# Supplementary material for: RNA promotes phase separation of glycolysis enzymes into yeast G bodies in hypoxia
Source: eLife. 2020 Apr 16;9:e48480. doi: 10.7554/eLife.48480 (PMC7162659; doi:10.7554/eLife.48480)
Supplement: Figure 1—figure supplement 1—source data 1. [file elife-48480-fig1-figsupp1-data1.xlsx]

## Sheet: Sheet1
Source data for Figure 1 Figure Supplement 1E
Binding site RPM/Gene RPKM	Gene RPKM	CHR	START	STOP	Binding site RPM	Gene	LOG(Binding site RPM/Gene RPKM)	Identical site	Overlapping site	Unique site	LOG(binding site)	Proteins with binding site
0.0025355	4941	11	163588	163616	12.5279	YKL152C	-2.59594	Yes	No	No	1.09788	PFK2	FBA1	ENO1
0.0436928	4419.02	12	368817	368837	193.08	YLR109W	-1.35959	Yes	No	No	2.28574	PFK2	FBA1	ENO1
0.473901	339.185	12	639615	639635	160.74	YLR249W	-0.324313	Yes	Yes	No	2.20612	PFK2	ENO1
0.0304698	758.117	12	820180	820214	23.0997	YLR344W	-1.51613	Yes	No	No	1.36361	PFK2	FBA1
1.46517	148.796	12	868441	868466	218.011	YLR372W	0.165888	Yes	No	No	2.33848	PFK2	ENO1
0.402626	262.672	12	904351	904368	105.758	YLR390W-A	-0.395098	Yes	No	No	2.02432	PFK2	FBA1	ENO1
0.401233	707.145	12	40144	40169	283.73	YLL050C	-0.396604	Yes	No	No	2.45291	PFK2	ENO1
0.0589676	178.574	12	224648	224678	10.5301	YLR038C	-1.22939	Yes	No	No	1.02243	PFK2	ENO1
5.71054	10.1236	12	357219	357239	57.8115	YLR106C	0.756677	Yes	No	No	1.76201	PFK2	ENO1
0.00103466	93527	12	369886	369907	96.7687	YLR110C	-2.9852	Yes	No	No	1.98573	PFK2	FBA1	ENO1
0.21992	460.46	12	709483	709508	101.264	YLR286C	-0.657736	Yes	Yes	No	2.00546	PFK2	ENO1
0.0782955	1347.04	12	1018017	1018042	105.467	YLR441C	-1.10626	Yes	Yes	No	2.02312	PFK2	ENO1
0.0356873	1347.04	12	1018059	1018089	48.0722	YLR441C	-1.44749	Yes	Yes	No	1.68189	PFK2	ENO1
0.0392096	1347.04	12	1018274	1018300	52.817	YLR441C	-1.40661	Yes	No	No	1.72277	PFK2	ENO1
0.189552	32.0583	13	285676	285695	6.0767	YMR010W	-0.722273	Yes	No	No	0.783668	PFK2	FBA1
0.636739	358.008	13	633673	633692	227.958	YMR186W	-0.196039	Yes	No	No	2.35785	PFK2	ENO1
0.0382684	2924.57	2	681344	681363	111.919	LSR1	-1.41716	Yes	No	No	2.0489	PFK2	ENO1
2.75287	46.6424	14	140191	140213	128.401	YNL268W	0.439786	Yes	No	No	2.10857	PFK2	FBA1
0.126418	2924.57	2	681762	681780	369.719	LSR1	-0.89819	Yes	Yes	No	2.56787	PFK2	FBA1
1.98167	77.1859	14	604465	604489	152.957	YNL016W	0.297031	Yes	No	No	2.18457	PFK2	ENO1
2.91942	24.778	14	704883	704901	72.3373	YNR044W	0.465297	Yes	No	No	1.85936	PFK2	FBA1
0.407763	238.337	14	196590	196614	97.185	YNL241C	-0.389593	Yes	No	No	1.9876	PFK2	FBA1
1.12864	95.2167	14	470515	470539	107.465	YNL084C	0.0525537	Yes	No	No	2.03127	PFK2	ENO1
0.0373017	136.125	14	506799	506819	5.0777	YNL064C	-1.42827	Yes	No	No	0.705667	PFK2	FBA1
0.536433	138.107	14	630893	630917	74.0853	YNR001C	-0.270484	Yes	No	No	1.86973	PFK2	ENO1
2.10142	76.8282	14	659868	659886	161.448	YNR016C	0.322512	Yes	No	No	2.20803	PFK2	ENO1
0.054172	1860.08	15	110670	110700	100.764	YOL109W	-1.26622	Yes	No	No	2.00331	PFK2	ENO1
0.0712334	3640.13	15	445862	445883	259.299	YOR063W	-1.14732	Yes	No	No	2.4138	PFK2	ENO1
7.80542	66.1261	15	780493	780510	516.142	snR17a	0.892396	Yes	Yes	No	2.71277	PFK2	FBA1
0.160187	1164.29	15	867959	867979	186.504	YOR293W	-0.795373	Yes	No	No	2.27069	PFK2	ENO1
0.0999182	4314.22	15	253096	253115	431.069	YOL040C	-1.00036	Yes	No	No	2.63455	PFK2	ENO1
3.87357	263.443	16	702039	702058	1020.46	YPR080W	0.588112	Yes	No	No	3.0088	PFK2	FBA1	ENO1
0.0404211	795.946	16	731173	731204	32.173	YPR102C	-1.39339	Yes	No	No	1.50749	PFK2	ENO1
4766	0.0204	mt	59125	59145	97.2265	NULL	3.67815	Yes	No	No	1.98778	PFK2	ENO1	*
3511.25	0.0204	mt	62173	62200	71.6295	NULL	3.54546	Yes	No	No	1.85509	PFK2	FBA1	*
0.742689	208.585	4	45911	45929	154.914	YDL229W	-0.129193	Yes	No	No	2.19009	PFK2	ENO1
0.0845388	228.933	4	78522	78557	19.3537	YDL212W	-1.07294	Yes	Yes	No	1.28676	PFK2	ENO1
0.0188886	268.829	1	140171	140192	5.0778	YAL005C	-1.7238	Yes	No	No	0.705676	PFK2	FBA1	ENO1
0.264371	199.154	4	427332	427360	52.6506	YDL014W	-0.577786	Yes	No	No	1.7214	PFK2	FBA1
0.484763	134.883	4	472955	472982	65.3865	YDR012W	-0.314471	Yes	No	No	1.81549	PFK2	FBA1
0.245105	411.617	4	508286	508307	100.889	YDR033W	-0.610648	Yes	No	No	2.00385	PFK2	ENO1
0.16856	411.617	4	509300	509320	69.3822	YDR033W	-0.773246	Yes	No	No	1.84125	PFK2	ENO1
0.136969	932.587	4	602009	602029	127.735	YDR077W	-0.863379	Yes	No	No	2.10631	PFK2	ENO1
0.0426212	932.587	4	602100	602130	39.748	YDR077W	-1.37037	Yes	No	No	1.59932	PFK2	ENO1
0.961707	112.61	4	654609	654633	108.297	YDR099W	-0.0169572	Yes	No	No	2.03462	PFK2	ENO1
0.00910062	1618.99	4	1302118	1302154	14.7338	YDR418W	-2.04093	Yes	Yes	No	1.16831	PFK2	FBA1
5.78366	57.2826	4	1322877	1322894	331.303	YDR427W	0.762203	Yes	No	No	2.52023	PFK2	ENO1
0.0118048	11085	4	130243	130258	130.857	YDL184C	-1.92794	Yes	No	No	2.1168	PFK2	ENO1
0.00326953	16103.4	4	221644	221672	52.6506	YDL133C-A	-2.48551	Yes	Yes	No	1.7214	PFK2	FBA1
0.11097	483.082	4	323401	323422	53.6078	snR63	-0.954793	Yes	No	No	1.72923	PFK2	FBA1	ENO1
0.0982654	1308.79	4	340586	340604	128.609	YDL061C	-1.0076	Yes	No	No	2.10927	PFK2	ENO1
38.7971	4.64945	4	665509	665529	180.385	YDR104C	1.5888	Yes	No	No	2.2562	PFK2	ENO1
0.113945	831.361	4	720973	720991	94.7294	YDR133C	-0.943305	Yes	No	No	1.97648	PFK2	ENO1
0.0058265	1271.52	4	768450	768473	7.4085	YDR155C	-2.23459	Yes	No	No	0.86973	PFK2	FBA1	ENO1
0.0480908	312.432	4	929395	929425	15.0251	YDR233C	-1.31794	Yes	No	No	1.17682	PFK2	ENO1
0.423543	16.5093	4	1154189	1154208	6.9924	YDR342C	-0.373102	Yes	No	No	0.844626	PFK2	FBA1	ENO1
0.0852138	1043.29	4	1445487	1445510	88.9025	YDR497C	-1.06949	Yes	No	No	1.94891	PFK2	ENO1
0.223364	940.257	2	333905	333928	210.019	YBR048W	-0.650987	Yes	No	No	2.32226	PFK2	ENO1
0.02516	15071.9	4	1489487	1489508	379.209	YDR524C-B	-1.59929	Yes	No	No	2.57888	PFK2	FBA1	ENO1
0.189661	1023.07	5	397668	397689	194.037	YER117W	-0.722023	Yes	No	No	2.28788	PFK2	ENO1
0.499163	331.859	2	393098	393119	165.652	YBR078W	-0.301758	Yes	No	No	2.2192	PFK2	ENO1
0.141146	1167.13	5	442417	442446	164.736	SCR1	-0.85033	Yes	Yes	No	2.21679	PFK2	FBA1
0.147563	1458.23	1	73393	73419	215.18	YAL038W	-0.831023	Yes	No	No	2.3328	PFK2	ENO1
0.0427126	3729.2	6	75998	76017	159.284	YFL031W	-1.36944	Yes	No	No	2.20217	PFK2	ENO1
0.224759	611.096	6	220437	220459	137.349	YFR031C-A	-0.648283	Yes	No	No	2.13783	PFK2	FBA1
0.933354	355.539	7	22139	22159	331.844	YGL255W	-0.0299535	Yes	No	No	2.52093	PFK2	ENO1
0.160639	41.7146	7	274692	274726	6.701	YGL125W	-0.794149	Yes	No	No	0.82614	PFK2	ENO1
0.358488	318.156	7	479546	479566	114.055	YGL008C	-0.445525	Yes	Yes	No	2.05712	PFK2	ENO1
0.211796	318.156	7	482083	482108	67.3843	YGL008C	-0.674082	Yes	No	No	1.82856	PFK2	ENO1
0.121059	4930.59	7	882727	882750	596.894	YGR192C	-0.917001	Yes	No	No	2.7759	PFK2	FBA1	ENO1
2.49785	82.9306	7	973820	973842	207.148	YGR240C	0.397566	Yes	No	No	2.31628	PFK2	FBA1	ENO1
0.162786	498.319	7	1057671	1057697	81.1192	YGR282C	-0.788384	Yes	No	No	1.90912	PFK2	ENO1
2.34375	42.4068	8	445409	445431	99.391	YHR170W	0.369911	Yes	No	No	1.99735	PFK2	FBA1
4.33272	36.859	8	467033	467054	159.7	YHR180W-A	0.636761	Yes	Yes	No	2.2033	PFK2	FBA1
2.86041	72.6081	8	485922	485941	207.689	YHR190W	0.456428	Yes	No	No	2.31741	PFK2	ENO1
8.73381	17.58	2	213990	214009	153.54	YBL007C	0.941204	Yes	No	No	2.18622	PFK2	ENO1
0.710441	354.848	10	121765	121785	252.098	YJL159W	-0.148472	Yes	Yes	No	2.40157	PFK2	FBA1
0.20397	549.521	10	339360	339377	112.086	YJL052W	-0.690434	Yes	No	No	2.04955	PFK2	ENO1
0.132839	1556.88	10	228172	228199	206.815	snR37	-0.876673	Yes	No	No	2.31558	PFK2	ENO1
0.171285	139.721	10	521346	521378	23.9321	YJR045C	-0.766282	Yes	No	No	1.37898	PFK2	ENO1
0.012489	12400.7	11	259439	259459	154.871	YKL096W-A	-1.90347	Yes	No	No	2.18997	PFK2	ENO1
0.804261	85.3369	11	341901	341926	68.6331	YKL051W	-0.0946032	Yes	No	No	1.83653	PFK2	ENO1
1.03462	136.125	14	506799	506819	140.838	YNL064C	0.0147815	Yes	No	No	2.14872	FBA1	PFK2
1.44877	76.8282	14	656395	656418	111.306	YNR016C	0.160999	Yes	No	No	2.04652	FBA1	ENO1
0.0389128	2924.57	2	681762	681780	113.803	LSR1	-1.40991	Yes	Yes	No	2.05615	FBA1	PFK2
0.0183075	5007.07	15	254678	254706	91.6668	YOL039W	-1.73737	Yes	No	No	1.96221	FBA1	ENO1
0.389223	66.1261	15	780493	780510	25.7378	snR17a	-0.409801	Yes	Yes	No	1.41057	FBA1	PFK2
8.75429	170.221	15	409821	409845	1490.16	snR62	0.942221	Yes	Yes	No	3.17323	FBA1	ENO1
0.128087	8793.58	15	759484	759508	1126.34	snR35	-0.892495	Yes	No	No	3.05167	FBA1	ENO1
0.0160577	38.8723	15	822820	822845	0.6242	YOR267C	-1.79432	Yes	No	No	-0.204676	FBA1	ENO1
11.6549	11.8615	15	993748	993770	138.244	YOR350C	1.06651	Yes	No	No	2.14065	FBA1	ENO1
1.16967	123.322	16	110500	110522	144.247	YPL231W	0.0680652	Yes	No	No	2.15911	FBA1	ENO1
5.09556	52.6116	16	173826	173855	268.085	YPL198W	0.707192	Yes	No	No	2.42827	FBA1	ENO1
0.101055	2543.58	16	303305	303330	257.042	YPL131W	-0.995442	Yes	No	No	2.41	FBA1	ENO1
0.244622	69.2923	3	217537	217557	16.9504	YCR053W	-0.611505	Yes	No	No	1.22918	FBA1	ENO1
0.997391	263.443	16	702039	702058	262.756	YPR080W	-0.00113435	Yes	No	No	2.41955	FBA1	PFK2	ENO1
1.17997	186.462	16	732277	732300	220.019	YPR103W	0.0718709	Yes	No	No	2.34246	FBA1	ENO1
0.66772	285.642	16	829776	829797	190.728	YPR149W	-0.175406	Yes	No	No	2.28042	FBA1	ENO1
0.577473	45.1517	16	839872	839900	26.0739	YPR156C	-0.238468	Yes	No	No	1.41621	FBA1	ENO1
30.5931	0.0204	mt	62173	62200	0.6241	NULL	1.48562	Yes	No	No	-0.204746	FBA1	PFK2	*
0.144268	2113.55	3	178629	178660	304.916	snR189	-0.840831	Yes	Yes	No	2.48418	FBA1	ENO1
0.923697	199.154	4	427332	427360	183.958	YDL014W	-0.0344703	Yes	No	No	2.26472	FBA1	PFK2
1.45959	134.883	4	472955	472982	196.875	YDR012W	0.164232	Yes	No	No	2.29419	FBA1	PFK2
0.305641	411.617	4	509133	509162	125.807	YDR033W	-0.514788	Yes	No	No	2.09971	FBA1	ENO1
0.338474	222.447	4	807434	807454	75.2925	YDR171W	-0.470475	Yes	No	No	1.87675	FBA1	ENO1
0.815401	268.829	1	140171	140192	219.203	YAL005C	-0.0886288	Yes	No	No	2.34085	FBA1	PFK2	ENO1
3.94449	49.3757	4	1020649	1020674	194.762	YDR280W	0.595991	Yes	No	No	2.2895	FBA1	ENO1
0.032833	1618.99	4	1302118	1302154	53.1562	YDR418W	-1.48369	Yes	Yes	No	1.72555	FBA1	PFK2
0.0191555	16103.4	4	221644	221672	308.469	YDL133C-A	-1.71771	Yes	Yes	No	2.48921	FBA1	PFK2
0.684865	483.082	4	323349	323369	330.846	snR63	-0.164395	Yes	No	No	2.51963	FBA1	ENO1
1.3091	483.082	4	323401	323422	632.401	snR63	0.116972	Yes	No	No	2.80099	FBA1	PFK2	ENO1
0.0966234	823.467	4	356763	356795	79.5662	YDL055C	-1.01492	Yes	No	No	1.90073	FBA1	ENO1
1.12088	114.211	4	550579	550604	128.017	YDR046C	0.0495582	Yes	No	No	2.10727	FBA1	ENO1
0.00854828	831.361	4	720844	720869	7.1067	YDR133C	-2.06812	Yes	No	No	0.851668	FBA1	ENO1
0.161708	1271.52	4	768450	768473	205.615	YDR155C	-0.791268	Yes	No	No	2.31305	FBA1	PFK2	ENO1
5.74149	16.5093	4	1154189	1154208	94.788	YDR342C	0.759025	Yes	No	No	1.97675	FBA1	PFK2	ENO1
1.13035	301.657	4	1162846	1162867	340.978	YDR345C	0.0532126	Yes	No	No	2.53273	FBA1	ENO1
0.0157373	15071.9	4	1489487	1489508	237.191	YDR524C-B	-1.80307	Yes	No	No	2.3751	FBA1	PFK2	ENO1
0.419791	339.956	5	363735	363755	142.71	YER102W	-0.376967	Yes	No	No	2.15446	FBA1	ENO1
0.180573	1167.13	5	442323	442347	210.752	SCR1	-0.743347	Yes	No	No	2.32377	FBA1	ENO1
0.0960264	1167.13	5	442417	442446	112.075	SCR1	-1.01761	Yes	Yes	No	2.04951	FBA1	PFK2
0.232847	121.465	5	223728	223746	28.2828	YER036C	-0.63293	Yes	No	No	1.45152	FBA1	ENO1
1.33816	126.706	5	334094	334118	169.553	YER088C	0.126507	Yes	No	No	2.22931	FBA1	ENO1
0.375599	611.096	6	220437	220459	229.527	YFR031C-A	-0.425275	Yes	No	No	2.36083	FBA1	PFK2
0.329258	143.588	6	253455	253482	47.2773	YFR052C-A	-0.482464	Yes	No	No	1.67465	FBA1	ENO1
7.69478	30.2096	7	169235	169256	232.456	YGL178W	0.886196	Yes	No	No	2.36634	FBA1	ENO1
0.811113	1458.23	1	73361	73383	1182.79	YAL038W	-0.0909189	Yes	No	No	3.07291	FBA1	ENO1
0.916543	86.3921	7	600798	600825	79.1821	YGR055W	-0.037847	Yes	No	No	1.89863	FBA1	ENO1
4.51256	31.0398	7	724785	724810	140.069	YGR116W	0.654423	Yes	No	No	2.14634	FBA1	ENO1
0.64669	177.835	7	800140	800169	115.004	YGR155W	-0.189304	Yes	No	No	2.06071	FBA1	ENO1
14.1191	12.9406	7	932476	932499	182.709	YGR218W	1.14981	Yes	No	No	2.26176	FBA1	ENO1
0.299084	331.859	2	394636	394657	99.2537	YBR078W	-0.524206	Yes	No	No	1.99675	FBA1	ENO1
1.27518	318.156	7	481915	481938	405.707	YGL008C	0.105572	Yes	No	No	2.60821	FBA1	ENO1
0.747238	318.156	7	482816	482838	237.738	YGL008C	-0.126541	Yes	No	No	2.3761	FBA1	ENO1
0.374703	528.106	7	508412	508435	197.883	YGR008C	-0.426312	Yes	No	No	2.29641	FBA1	ENO1
0.0722115	1240.16	7	559593	559617	89.5541	YGR037C	-1.14139	Yes	No	No	1.95209	FBA1	ENO1
0.170249	1240.16	7	560016	560034	211.136	YGR037C	-0.768916	Yes	No	No	2.32456	FBA1	ENO1
0.0432693	4930.59	7	882727	882750	213.343	YGR192C	-1.36382	Yes	No	No	2.32908	FBA1	PFK2	ENO1
0.147363	4930.59	7	882931	882950	726.586	YGR192C	-0.831611	Yes	Yes	No	2.86129	FBA1	ENO1
0.0485481	4930.59	7	883182	883204	239.371	YGR192C	-1.31383	Yes	No	No	2.37907	FBA1	ENO1
0.197986	939.577	7	939488	939509	186.023	snR7-L	-0.703365	Yes	No	No	2.26957	FBA1	ENO1
2.5002	82.9306	7	973820	973842	207.343	YGR240C	0.397975	Yes	No	No	2.31669	FBA1	PFK2	ENO1
3.36979	42.4068	8	445409	445431	142.902	YHR170W	0.527603	Yes	No	No	2.15504	FBA1	PFK2
4.49712	36.859	8	467033	467054	165.759	YHR180W-A	0.652934	Yes	Yes	No	2.21948	FBA1	PFK2
2.37729	68.3309	8	124021	124048	162.443	YHR009C	0.376083	Yes	No	No	2.2107	FBA1	ENO1
0.117687	209.721	9	128505	128530	24.6814	YIL123W	-0.929272	Yes	No	No	1.39237	FBA1	ENO1
1.8474	86.1386	9	214523	214547	159.132	YIL078W	0.26656	Yes	No	No	2.20176	FBA1	ENO1
0.116105	676.612	9	317205	317228	78.5579	YIL018W	-0.93515	Yes	No	No	1.89519	FBA1	ENO1
1.33224	47.1085	2	84225	84244	62.7598	YBL076C	0.124582	Yes	No	No	1.79768	FBA1	ENO1
0.22054	354.848	10	121765	121785	78.2583	YJL159W	-0.656512	Yes	Yes	No	1.89353	FBA1	PFK2
7.45802	13.0443	2	94124	94150	97.285	YBL067C	0.872623	Yes	No	No	1.98805	FBA1	ENO1
0.0970411	2993.68	10	74856	74879	290.51	YJL190C	-1.01304	Yes	Yes	No	2.46316	FBA1	ENO1
3.65235	46.0942	10	153360	153380	168.352	YJL138C	0.562572	Yes	No	No	2.22622	FBA1	ENO1
3.55366	17.6607	10	212422	212444	62.7599	YJL109C	0.550676	Yes	No	No	1.79768	FBA1	ENO1
3.27264	321.03	10	349129	349155	1050.62	YJL047C-A	0.514899	Yes	No	No	3.02144	FBA1	ENO1
1.11709	122.25	11	103562	103589	136.564	YKL182W	0.0480864	Yes	No	No	2.13534	FBA1	ENO1
0.0937607	1652.16	11	110165	110187	154.907	YKL180W	-1.02798	Yes	No	No	2.19007	FBA1	ENO1
6.31145	22.9232	11	554690	554718	144.679	YKR058W	0.800129	Yes	No	No	2.16041	FBA1	ENO1
0.0288537	4941	11	163588	163616	142.566	YKL152C	-1.5398	Yes	No	No	2.15402	FBA1	PFK2	ENO1
0.153929	1456.49	12	366244	366263	224.197	snR6	-0.812678	Yes	No	No	2.35063	FBA1	ENO1
0.0207654	4419.02	12	368817	368837	91.7629	YLR109W	-1.68266	Yes	No	No	1.96267	FBA1	PFK2	ENO1
0.00171003	758.117	12	820180	820214	1.2964	YLR344W	-2.767	Yes	No	No	0.112739	FBA1	PFK2
0.215529	262.672	12	904351	904368	56.6135	YLR390W-A	-0.666493	Yes	No	No	1.75292	FBA1	PFK2	ENO1
6.68685	22.2682	12	1057919	1057944	148.904	YLR459W	0.825221	Yes	No	No	2.17291	FBA1	ENO1
0.356277	2410.9	12	233176	233196	858.951	YLR044C	-0.448212	Yes	Yes	No	2.93397	FBA1	ENO1
0.219792	198.809	12	257911	257937	43.6966	YLR058C	-0.657987	Yes	No	No	1.64045	FBA1	ENO1
0.000953927	93527	12	369886	369907	89.2179	YLR110C	-3.02048	Yes	No	No	1.95045	FBA1	PFK2	ENO1
0.0260938	1347.04	12	1018423	1018441	35.1494	YLR441C	-1.58346	Yes	No	No	1.54592	FBA1	ENO1
7.38116	13.3819	13	105854	105874	98.7736	YML081W	0.868125	Yes	No	No	1.99464	FBA1	ENO1
3.65026	32.0583	13	285676	285695	117.021	YMR010W	0.562323	Yes	No	No	2.06826	FBA1	PFK2
0.415836	233.835	13	298172	298208	97.2369	snR74	-0.381078	Yes	No	No	1.98783	FBA1	ENO1
0.211191	268.068	2	612206	612226	56.6135	YBR196C	-0.675324	Yes	No	No	1.75292	FBA1	ENO1
0.232149	268.068	2	612624	612644	62.2316	YBR196C	-0.634233	Yes	No	No	1.79401	FBA1	ENO1
3.31529	44.0309	13	11754	11775	145.975	YML130C	0.520521	Yes	No	No	2.16428	FBA1	ENO1
0.473916	132.225	13	755256	755276	62.6637	YMR243C	-0.324298	Yes	No	No	1.79702	FBA1	ENO1
4.68215	46.6424	14	140191	140213	218.387	YNL268W	0.670445	Yes	No	No	2.33923	FBA1	PFK2
0.442439	2924.57	2	681017	681038	1293.94	LSR1	-0.354146	Yes	No	No	3.11192	FBA1	ENO1
1.51354	24.778	14	704883	704901	37.5023	YNR044W	0.179993	Yes	No	No	1.57406	FBA1	PFK2
0.173238	842.071	14	61873	61891	145.879	YNL302C	-0.761356	Yes	No	No	2.16399	FBA1	ENO1
0.332108	842.071	14	61900	61929	279.658	YNL302C	-0.478721	Yes	No	No	2.44663	FBA1	ENO1
10.9789	2924.57	2	681116	681137	32108.5	LSR1	1.04056	Yes	No	No	4.50662	FBA1	ENO1
0.623155	238.337	14	196590	196614	148.521	YNL241C	-0.205404	Yes	No	No	2.17179	FBA1	PFK2
0.0238121	116.962	14	316710	316738	2.7851	YNL169C	-1.6232	Yes	No	No	0.444841	FBA1	ENO1
2.28674	122.25	11	103562	103589	279.554	YKL182W	0.359217	Yes	No	No	2.44647	ENO1	FBA1
0.110809	1652.16	11	110165	110187	183.073	YKL180W	-0.955427	Yes	No	No	2.26262	ENO1	FBA1
0.00689965	12400.7	11	259439	259459	85.5602	YKL096W-A	-2.16117	Yes	No	No	1.93227	ENO1	PFK2
0.892781	85.3369	11	341901	341926	76.1872	YKL051W	-0.0492548	Yes	No	No	1.88188	ENO1	PFK2
4.24638	22.9232	11	554690	554718	97.3408	YKR058W	0.628019	Yes	No	No	1.98829	ENO1	FBA1
0.0164114	4941	11	163588	163616	81.0887	YKL152C	-1.78485	Yes	No	No	1.90896	ENO1	PFK2	FBA1
0.0464639	1456.49	12	366244	366263	67.6742	snR6	-1.33288	Yes	No	No	1.83042	ENO1	FBA1
0.0586497	4419.02	12	368817	368837	259.174	YLR109W	-1.23173	Yes	No	No	2.41359	ENO1	PFK2	FBA1
0.772981	339.185	12	639615	639635	262.183	YLR249W	-0.111831	Yes	Yes	No	2.41861	ENO1	PFK2
0.309758	148.796	12	868441	868466	46.0907	YLR372W	-0.508977	Yes	No	No	1.66361	ENO1	PFK2
0.107704	262.672	12	904351	904368	28.2908	YLR390W-A	-0.967768	Yes	No	No	1.45165	ENO1	PFK2	FBA1
4.17434	22.2682	12	1057919	1057944	92.9553	YLR459W	0.620588	Yes	No	No	1.96827	ENO1	FBA1
0.00595846	707.145	12	40144	40169	4.2135	YLL050C	-2.22487	Yes	No	No	0.624643	ENO1	PFK2
0.708822	178.574	12	224648	224678	126.577	YLR038C	-0.149463	Yes	No	No	2.10236	ENO1	PFK2
0.230069	2410.9	12	233176	233196	554.674	YLR044C	-0.638143	Yes	Yes	No	2.74404	ENO1	FBA1
1.12241	198.809	12	257911	257937	223.144	YLR058C	0.0501509	Yes	No	No	2.34859	ENO1	FBA1
7.15194	10.1236	12	357219	357239	72.4037	YLR106C	0.854424	Yes	No	No	1.85976	ENO1	PFK2
0.0121087	93527	12	369886	369907	1132.49	YLR110C	-1.9169	Yes	No	No	3.05403	ENO1	PFK2	FBA1
0.208224	460.46	12	709483	709508	95.879	YLR286C	-0.681468	Yes	Yes	No	1.98172	ENO1	PFK2
0.0687517	1347.04	12	1018017	1018042	92.6114	YLR441C	-1.16272	Yes	Yes	No	1.96666	ENO1	PFK2
0.0592401	1347.04	12	1018059	1018089	79.7989	YLR441C	-1.22738	Yes	Yes	No	1.902	ENO1	PFK2
0.0665813	1347.04	12	1018274	1018300	89.6877	YLR441C	-1.17665	Yes	No	No	1.95273	ENO1	PFK2
0.0324927	1347.04	12	1018423	1018441	43.769	YLR441C	-1.48821	Yes	No	No	1.64117	ENO1	FBA1
4.95435	13.3819	13	105854	105874	66.2984	YML081W	0.694987	Yes	No	No	1.8215	ENO1	FBA1
0.700543	233.835	13	298172	298208	163.811	snR74	-0.154565	Yes	No	No	2.21434	ENO1	FBA1
0.18927	358.008	13	633673	633692	67.7602	YMR186W	-0.722918	Yes	No	No	1.83097	ENO1	PFK2
1.99396	44.0309	13	11754	11775	87.7959	YML130C	0.299717	Yes	Yes	No	1.94347	ENO1	FBA1
0.655349	268.068	2	612206	612226	175.678	YBR196C	-0.183527	Yes	No	No	2.24472	ENO1	FBA1
0.28036	268.068	2	612624	612644	75.1553	YBR196C	-0.552285	Yes	No	No	1.87596	ENO1	FBA1
0.583997	132.225	13	755256	755276	77.2191	YMR243C	-0.233589	Yes	No	No	1.88772	ENO1	FBA1
0.454564	2924.57	2	681017	681038	1329.4	LSR1	-0.342405	Yes	No	No	3.12366	ENO1	FBA1
3.53345	77.1859	14	604465	604489	272.733	YNL016W	0.5482	Yes	No	No	2.43574	ENO1	PFK2
0.0531011	842.071	14	61873	61891	44.7149	YNL302C	-1.2749	Yes	No	No	1.65045	ENO1	FBA1
0.32116	842.071	14	61900	61929	270.439	YNL302C	-0.493279	Yes	No	No	2.43207	ENO1	FBA1
1.99204	2924.57	2	681116	681137	5825.86	LSR1	0.299298	Yes	No	No	3.76536	ENO1	FBA1
0.0230811	2924.57	2	681344	681363	67.5022	LSR1	-1.63674	Yes	No	No	1.82932	ENO1	PFK2
1.6542	116.962	14	316710	316738	193.478	YNL169C	0.218588	Yes	No	No	2.28663	ENO1	FBA1
0.992506	95.2167	14	470515	470539	94.5031	YNL084C	-0.00326684	Yes	No	No	1.97545	ENO1	PFK2
0.762103	138.107	14	630893	630917	105.252	YNR001C	-0.117986	Yes	No	No	2.02223	ENO1	PFK2
1.20879	76.8282	14	656395	656418	92.8693	YNR016C	0.0823515	Yes	No	No	1.96787	ENO1	FBA1
3.35104	76.8282	14	659868	659886	257.454	YNR016C	0.525179	Yes	No	No	2.4107	ENO1	PFK2
0.0410053	1860.08	15	110670	110700	76.2732	YOL109W	-1.38716	Yes	No	No	1.88237	ENO1	PFK2
0.0153533	5007.07	15	254678	254706	76.8752	YOL039W	-1.8138	Yes	No	No	1.88579	ENO1	FBA1
0.000236255	3640.13	15	445862	445883	0.86	YOR063W	-3.62662	Yes	No	No	-0.0655015	ENO1	PFK2
0.249561	1164.29	15	867959	867979	290.561	YOR293W	-0.602824	Yes	No	No	2.46324	ENO1	PFK2
0.0156465	4314.22	15	253096	253115	67.5023	YOL040C	-1.80558	Yes	No	No	1.82932	ENO1	PFK2
1.35977	170.221	15	409821	409845	231.461	snR62	0.133465	Yes	Yes	No	2.36448	ENO1	FBA1
0.0316996	8793.58	15	759484	759508	278.753	snR35	-1.49895	Yes	No	No	2.44522	ENO1	FBA1
4.55476	38.8723	15	822820	822845	177.054	YOR267C	0.658465	Yes	No	No	2.2481	ENO1	FBA1
3.52326	11.8615	15	993748	993770	41.7912	YOR350C	0.546945	Yes	No	No	1.62108	ENO1	FBA1
1.68602	123.322	16	110500	110522	207.924	YPL231W	0.226863	Yes	No	No	2.3179	ENO1	FBA1
0.899322	52.6116	16	173826	173855	47.3147	YPL198W	-0.046085	Yes	No	No	1.675	ENO1	FBA1
0.112441	2543.58	16	303305	303330	286.003	YPL131W	-0.949074	Yes	No	No	2.45637	ENO1	FBA1
1.25835	69.2923	3	217537	217557	87.194	YCR053W	0.0998016	Yes	No	No	1.94049	ENO1	FBA1
2.11709	263.443	16	702039	702058	557.732	YPR080W	0.325739	Yes	No	No	2.74643	ENO1	PFK2	FBA1
0.5059	186.462	16	732277	732300	94.3311	YPR103W	-0.295935	Yes	No	No	1.97465	ENO1	FBA1
0.31489	285.642	16	829776	829797	89.9456	YPR149W	-0.501841	Yes	No	No	1.95398	ENO1	FBA1
0.220175	795.946	16	731173	731204	175.248	YPR102C	-0.657231	Yes	No	No	2.24365	ENO1	PFK2
0.912243	45.1517	16	839872	839900	41.1893	YPR156C	-0.0398897	Yes	No	No	1.61478	ENO1	FBA1
2701.95	0.0204	mt	59125	59145	55.1197	NULL	3.43168	Yes	No	No	1.74131	ENO1	PFK2	*
0.000244092	2113.55	3	178629	178660	0.5159	snR189	-3.61245	Yes	Yes	No	-0.287434	ENO1	FBA1
0.703307	208.585	4	45911	45929	146.699	YDL229W	-0.152855	Yes	No	No	2.16643	ENO1	PFK2
0.36472	228.933	4	78522	78557	83.4964	YDL212W	-0.43804	Yes	Yes	No	1.92167	ENO1	PFK2
0.473384	411.617	4	508286	508307	194.853	YDR033W	-0.324786	Yes	No	No	2.28971	ENO1	PFK2
0.405908	411.617	4	509133	509162	167.079	YDR033W	-0.391572	Yes	No	No	2.22292	ENO1	FBA1
0.423665	411.617	4	509300	509320	174.388	YDR033W	-0.372977	Yes	No	No	2.24152	ENO1	PFK2
0.100689	932.587	4	602009	602029	93.9012	YDR077W	-0.997018	Yes	No	No	1.97267	ENO1	PFK2
0.0934047	932.587	4	602100	602130	87.108	YDR077W	-1.02963	Yes	No	No	1.94006	ENO1	PFK2
1.63413	112.61	4	654609	654633	184.019	YDR099W	0.213287	Yes	No	No	2.26486	ENO1	PFK2
0.339403	222.447	4	807434	807454	75.4993	YDR171W	-0.469284	Yes	No	No	1.87794	ENO1	FBA1
0.365611	268.829	1	140171	140192	98.2867	YAL005C	-0.436981	Yes	No	No	1.99249	ENO1	PFK2	FBA1
2.00974	49.3757	4	1020649	1020674	99.2326	YDR280W	0.303141	Yes	No	No	1.99665	ENO1	FBA1
7.19956	57.2826	4	1322877	1322894	412.409	YDR427W	0.857306	Yes	No	No	2.61533	ENO1	PFK2
0.000682644	11085	4	130243	130258	7.5671	YDL184C	-3.16581	Yes	No	No	0.878929	ENO1	PFK2
0.32272	483.082	4	323349	323369	155.9	snR63	-0.491174	Yes	No	No	2.19285	ENO1	FBA1
0.215028	483.082	4	323401	323422	103.876	snR63	-0.667505	Yes	No	No	2.01652	ENO1	PFK2	FBA1
0.0392898	1308.79	4	340586	340604	51.4221	YDL061C	-1.40572	Yes	No	No	1.71115	ENO1	PFK2
0.193812	823.467	4	356763	356795	159.598	YDL055C	-0.71262	Yes	No	No	2.20303	ENO1	FBA1
0.806362	114.211	4	550579	550604	92.0954	YDR046C	-0.0934698	Yes	No	No	1.96424	ENO1	FBA1
5.27099	4.64945	4	665509	665529	24.5072	YDR104C	0.721892	Yes	No	No	1.38929	ENO1	PFK2
0.10002	831.361	4	720844	720869	83.1524	YDR133C	-0.999915	Yes	No	No	1.91987	ENO1	FBA1
0.000620549	831.361	4	720973	720991	0.5159	YDR133C	-3.20722	Yes	No	No	-0.287434	ENO1	PFK2
0.283429	1271.52	4	768450	768473	360.384	YDR155C	-0.547556	Yes	No	No	2.55677	ENO1	PFK2	FBA1
0.284036	312.432	4	929395	929425	88.7418	YDR233C	-0.546627	Yes	No	No	1.94813	ENO1	PFK2
4.55751	16.5093	4	1154189	1154208	75.2413	YDR342C	0.658728	Yes	No	No	1.87646	ENO1	PFK2	FBA1
0.254558	301.657	4	1162846	1162867	76.7892	YDR345C	-0.594214	Yes	No	No	1.8853	ENO1	FBA1
0.320706	1043.29	4	1445487	1445510	334.588	YDR497C	-0.493893	Yes	No	No	2.52451	ENO1	PFK2
0.110132	15071.9	4	1489487	1489508	1659.9	YDR524C-B	-0.958085	Yes	No	No	3.22008	ENO1	PFK2	FBA1
0.272169	339.956	5	363735	363755	92.5254	YER102W	-0.565162	Yes	No	No	1.96626	ENO1	FBA1
0.222399	1023.07	5	397668	397689	227.53	YER117W	-0.652868	Yes	No	No	2.35704	ENO1	PFK2
0.0699191	1167.13	5	442323	442347	81.6046	SCR1	-1.1554	Yes	No	No	1.91171	ENO1	FBA1
0.16544	940.257	2	333905	333928	155.556	YBR048W	-0.781359	Yes	No	No	2.19189	ENO1	PFK2
0.385827	121.465	5	223728	223746	46.8646	YER036C	-0.413607	Yes	No	No	1.67084	ENO1	FBA1
0.753987	126.706	5	334094	334118	95.535	YER088C	-0.122636	Yes	No	No	1.98016	ENO1	FBA1
0.354471	331.859	2	393098	393119	117.634	YBR078W	-0.450419	Yes	No	No	2.07053	ENO1	PFK2
0.01455	3729.2	6	75998	76017	54.2598	YFL031W	-1.83714	Yes	No	No	1.73448	ENO1	PFK2
0.236833	331.859	2	394636	394657	78.595	YBR078W	-0.625558	Yes	No	No	1.89539	ENO1	FBA1
0.656318	143.588	6	253455	253482	94.2391	YFR052C-A	-0.182886	Yes	No	No	1.97423	ENO1	FBA1
0.0824736	355.539	7	22139	22159	29.3226	YGL255W	-1.08369	Yes	No	No	1.4672	ENO1	PFK2
1.54277	30.2096	7	169235	169256	46.6066	YGL178W	0.188302	Yes	No	No	1.66845	ENO1	FBA1
1.24714	41.7146	7	274692	274726	52.0241	YGL125W	0.095916	Yes	No	No	1.7162	ENO1	PFK2
0.00696707	86.3921	7	600798	600825	0.6019	YGR055W	-2.15695	Yes	No	No	-0.220476	ENO1	FBA1
3.04458	31.0398	7	724785	724810	94.5031	YGR116W	0.483527	Yes	No	No	1.97545	ENO1	FBA1
1.02269	177.835	7	800140	800169	181.869	YGR155W	0.00974204	Yes	No	No	2.25976	ENO1	FBA1
5.18309	12.9406	7	932476	932499	67.0723	YGR218W	0.714589	Yes	No	No	1.82654	ENO1	FBA1
0.439757	1458.23	1	73361	73383	641.266	YAL038W	-0.356787	Yes	No	No	2.80704	ENO1	FBA1
2.25058	318.156	7	479546	479566	716.035	YGL008C	0.352294	Yes	Yes	No	2.85493	ENO1	PFK2
0.218383	318.156	7	481915	481938	69.48	YGL008C	-0.660781	Yes	No	No	1.84186	ENO1	FBA1
1.94437	318.156	7	482083	482108	618.613	YGL008C	0.288779	Yes	No	No	2.79142	ENO1	PFK2
0.222438	318.156	7	482816	482838	70.7699	YGL008C	-0.652792	Yes	No	No	1.84985	ENO1	FBA1
0.0706671	528.106	7	508412	508435	37.3197	YGR008C	-1.15078	Yes	No	No	1.57194	ENO1	FBA1
0.201079	1240.16	7	559593	559617	249.371	YGR037C	-0.696633	Yes	No	No	2.39685	ENO1	FBA1
0.0664949	1240.16	7	560016	560034	82.4645	YGR037C	-1.17721	Yes	No	No	1.91627	ENO1	FBA1
0.927708	4930.59	7	882727	882750	4574.14	YGR192C	-0.0325886	Yes	No	No	3.66031	ENO1	PFK2	FBA1
0.0709387	4930.59	7	882931	882950	349.769	YGR192C	-1.14912	Yes	Yes	No	2.54378	ENO1	FBA1
0.0765448	4930.59	7	883182	883204	377.411	YGR192C	-1.11608	Yes	No	No	2.57681	ENO1	FBA1
0.100664	939.577	7	939488	939509	94.5814	snR7-L	-0.997127	Yes	No	No	1.97581	ENO1	FBA1
1.50557	82.9306	7	973820	973842	124.858	YGR240C	0.177701	Yes	No	No	2.09642	ENO1	PFK2	FBA1
0.386018	498.319	7	1057671	1057697	192.36	YGR282C	-0.413393	Yes	No	No	2.28411	ENO1	PFK2
0.898452	1458.23	1	73393	73419	1310.15	YAL038W	-0.046505	Yes	No	No	3.11732	ENO1	PFK2
0.087639	72.6081	8	485922	485941	6.3633	YHR190W	-1.0573	Yes	No	No	0.803682	ENO1	PFK2
1.28482	68.3309	8	124021	124048	87.7928	YHR009C	0.108842	Yes	No	No	1.94346	ENO1	FBA1
0.00287048	209.721	9	128505	128530	0.602	YIL123W	-2.54205	Yes	No	No	-0.220404	ENO1	FBA1
1.07015	86.1386	9	214523	214547	92.1814	YIL078W	0.0294452	Yes	No	No	1.96464	ENO1	FBA1
1.3745	47.1085	2	84225	84244	64.7505	YBL076C	0.138144	Yes	No	No	1.81124	ENO1	FBA1
0.215162	676.612	9	317205	317228	145.581	YIL018W	-0.667234	Yes	No	No	2.16311	ENO1	FBA1
6.11091	13.0443	2	94124	94150	79.7129	YBL067C	0.786106	Yes	No	No	1.90153	ENO1	FBA1
0.239887	549.521	10	339360	339377	131.823	YJL052W	-0.619994	Yes	No	No	2.11999	ENO1	PFK2
0.0660337	2993.68	10	74856	74879	197.684	YJL190C	-1.18023	Yes	Yes	No	2.29597	ENO1	FBA1
5.22347	46.0942	10	153360	153380	240.772	YJL138C	0.71796	Yes	No	No	2.38161	ENO1	FBA1
5.81847	17.6607	10	212422	212444	102.758	YJL109C	0.764809	Yes	No	No	2.01182	ENO1	FBA1
0.430869	1556.88	10	228172	228199	670.81	snR37	-0.365655	Yes	No	No	2.8266	ENO1	PFK2
4.72994	17.58	2	213990	214009	83.1524	YBL007C	0.674856	Yes	No	No	1.91987	ENO1	PFK2
0.28125	321.03	10	349129	349155	90.2896	YJL047C-A	-0.550908	Yes	No	No	1.95564	ENO1	FBA1
0.685601	139.721	10	521346	521378	95.793	YJR045C	-0.163929	Yes	No	No	1.98133	ENO1	PFK2
5.45834	156.759	11	46741	46761	855.644	tT(CGU)K	0.737061	No	Yes	No	2.93229	PFK2
0.00178055	3436.19	11	327358	327374	6.1183	YKL060C	-2.74945	No	Yes	No	0.786631	PFK2
0.129898	1266.59	11	559217	559234	164.528	snR42	-0.886396	No	Yes	No	2.21624	PFK2
0.0458034	2305.34	12	199021	199047	105.592	snR30	-1.3391	No	Yes	No	2.02363	PFK2
0.0378596	2305.34	12	199321	199337	87.2792	snR30	-1.42182	No	Yes	No	1.94091	PFK2
0.0866985	1013.42	12	441345	441371	87.862	YLR150W	-1.06199	No	Yes	No	1.9438	PFK2
0.473901	339.185	12	639615	639635	160.74	YLR249W	-0.324313	Yes	Yes	No	2.20612	PFK2	ENO1
0.301727	561.84	12	856816	856836	169.522	YLR367W	-0.520386	No	Yes	No	2.22923	PFK2
0.144389	2638.91	12	899181	899203	381.031	snR34	-0.840465	No	Yes	No	2.58096	PFK2
0.0508506	794.76	12	1029960	1029989	40.414	YLR448W	-1.2937	No	Yes	No	1.60653	PFK2
0.309541	2410.9	12	232367	232385	746.273	YLR044C	-0.509282	No	Yes	No	2.8729	PFK2
0.106845	2410.9	12	233175	233196	257.592	YLR044C	-0.971248	No	Yes	No	2.41093	PFK2
0.00231139	93527	12	369655	369674	216.177	YLR110C	-2.63613	No	Yes	No	2.33481	PFK2
0.000480173	93527	12	369979	369994	44.9091	YLR110C	-3.3186	No	Yes	No	1.65233	PFK2
46.7933	2.96125	12	592567	592586	138.567	tL(UAG)L1	1.67018	No	Yes	No	2.14166	PFK2
0.21992	460.46	12	709483	709508	101.264	YLR286C	-0.657736	Yes	Yes	No	2.00546	PFK2	ENO1
0.0782955	1347.04	12	1018017	1018042	105.467	YLR441C	-1.10626	Yes	Yes	No	2.02312	PFK2	ENO1
0.0356873	1347.04	12	1018059	1018089	48.0722	YLR441C	-1.44749	Yes	Yes	No	1.68189	PFK2	ENO1
0.0448739	1202.98	13	220752	220779	53.9824	YML028W	-1.34801	No	Yes	No	1.73225	PFK2
0.0373279	989.179	13	226719	226745	36.924	YML024W	-1.42797	No	Yes	No	1.56731	PFK2
0.283854	252.347	2	591668	591694	71.6297	YBR181C	-0.546905	No	Yes	No	1.85509	PFK2
0.060228	2579.47	13	297764	297783	155.357	snR76	-1.2202	No	Yes	No	2.19133	PFK2
0.381091	358.008	13	632959	632978	136.434	YMR186W	-0.418971	No	Yes	No	2.13492	PFK2
0.249879	693.41	13	651946	651969	173.268	YMR194W	-0.602271	No	Yes	No	2.23872	PFK2
0.129342	4035.61	13	652441	652469	521.975	snR11	-0.88826	No	Yes	No	2.71765	PFK2
0.00396792	9692.2	13	775089	775111	38.4579	YMR251W-A	-2.40144	No	Yes	No	1.58499	PFK2
0.0485	2924.57	2	680717	680735	141.842	LSR1	-1.31426	No	Yes	No	2.1518	PFK2
0.0614017	2924.57	2	681077	681100	179.573	LSR1	-1.21182	No	Yes	No	2.25424	PFK2
0.608791	1282.56	13	808279	808299	780.813	tQ(CUG)M	-0.215532	No	Yes	No	2.89255	PFK2
0.0140881	3424.08	14	89260	89286	48.2387	snR40	-1.85115	No	Yes	No	1.6834	PFK2
0.393756	2924.57	2	681526	681546	1151.57	LSR1	-0.404773	No	Yes	No	3.06129	PFK2
0.134853	420.058	14	255062	255091	56.6462	YNL208W	-0.870138	No	Yes	No	1.75317	PFK2
0.14184	228	14	283457	283484	32.3394	YNL190W	-0.848202	No	Yes	No	1.50973	PFK2
0.126418	2924.57	2	681762	681780	369.719	LSR1	-0.89819	Yes	Yes	No	2.56787	PFK2	FBA1
0.0124241	2924.57	2	681830	681858	36.3352	LSR1	-1.90573	No	Yes	No	1.56033	PFK2
0.616833	105.329	14	585897	585921	64.9703	NME1	-0.209832	No	Yes	No	1.81271	PFK2
0.37367	601.586	14	716248	716267	224.794	snR49	-0.427512	No	Yes	No	2.35179	PFK2
0.0740867	1860.08	15	110725	110746	137.807	YOL109W	-1.13026	No	Yes	No	2.13927	PFK2
7.80542	66.1261	15	780493	780510	516.142	snR17a	0.892396	Yes	Yes	No	2.71277	PFK2	FBA1
0.00811663	4363.82	15	832334	832349	35.4195	snR8	-2.09062	No	Yes	No	1.54924	PFK2
0.0780151	2445.56	15	842418	842443	190.791	snR5	-1.10782	No	Yes	No	2.28056	PFK2
0.0375133	7725.08	15	408003	408020	289.793	snR9	-1.42582	No	Yes	No	2.46209	PFK2
0.00111797	7725.08	15	408107	408124	8.6364	snR9	-2.95157	No	Yes	No	0.936333	PFK2
0.23584	170.221	15	409822	409845	40.145	snR62	-0.627382	No	Yes	No	1.60363	PFK2
0.0685007	1696.42	3	137712	137737	116.206	YCR012W	-1.1643	No	Yes	No	2.06523	PFK2
0.467129	580.874	15	594383	594403	271.343	tG(CCC)O	-0.330564	No	Yes	No	2.43352	PFK2
0.0070989	7768.5	15	648747	648773	55.1478	YOR167C	-2.14881	No	Yes	No	1.74153	PFK2
0.147132	498.156	16	624309	624331	73.2945	YPR028W	-0.832294	No	Yes	No	1.86507	PFK2
1.4565	263.443	16	701997	702027	383.704	YPR080W	0.16331	No	Yes	No	2.584	PFK2
0.152567	69.2923	3	218016	218043	10.5717	YCR053W	-0.81654	No	Yes	No	1.02414	PFK2
0.355969	285.642	16	830291	830308	101.68	YPR149W	-0.448588	No	Yes	No	2.00723	PFK2
1.98913	26.3225	16	45041	45070	52.3591	YPL263C	0.298664	No	Yes	No	1.71899	PFK2
0.0214823	765.297	16	718702	718737	16.4403	snR51	-1.66792	No	Yes	No	1.21591	PFK2
0.247454	765.297	16	718777	718796	189.376	snR51	-0.606505	No	Yes	No	2.27732	PFK2
0.0744476	1804.08	16	719205	719228	134.309	snR41	-1.12815	No	Yes	No	2.12811	PFK2
9770.72	0.0204	mt	8168	8193	199.323	NULL	3.98993	No	Yes	No	2.29956	PFK2	*
10646	0.0204	mt	58183	58207	217.178	NULL	4.02719	No	Yes	No	2.33682	PFK2	*
0.140158	950.865	3	163068	163085	133.271	YCR024C-B	-0.853383	No	Yes	No	2.12474	PFK2
0.0404324	2113.55	3	178630	178645	85.4558	snR189	-1.39327	No	Yes	No	1.93174	PFK2
0.0845388	228.933	4	78522	78557	19.3537	YDL212W	-1.07294	Yes	Yes	No	1.28676	PFK2	ENO1
1.02165	224.184	4	118525	118551	229.037	YDL191W	0.00930227	No	Yes	No	2.35991	PFK2
0.142384	562.121	4	309452	309476	80.0372	YDL082W	-0.846538	No	Yes	No	1.90329	PFK2
0.757572	90.0466	4	523038	523062	68.2168	YDR035W	-0.120576	No	Yes	No	1.83389	PFK2
20.0673	2.20075	4	884464	884488	44.1632	tI(UAU)D	1.30249	No	Yes	No	1.64506	PFK2
0.00971044	12112.9	4	1239859	1239875	117.621	YDR382W	-2.01276	No	Yes	No	2.07049	PFK2
0.00910062	1618.99	4	1302118	1302154	14.7338	YDR418W	-2.04093	Yes	Yes	No	1.16831	PFK2	FBA1
0.119877	1458.23	1	73326	73353	174.808	YAL038W	-0.921263	No	Yes	No	2.24256	PFK2
0.159509	1965.49	4	1402925	1402942	313.512	snR13	-0.797216	No	Yes	No	2.49625	PFK2
0.0466292	1965.49	4	1403016	1403038	91.6493	snR13	-1.33134	No	Yes	No	1.96213	PFK2
0.0213354	16103.4	4	221566	221584	343.572	YDL133C-A	-1.6709	No	Yes	No	2.53602	PFK2
0.00326953	16103.4	4	221644	221672	52.6506	YDL133C-A	-2.48551	Yes	Yes	No	1.7214	PFK2	FBA1
0.0065328	9863.19	4	309737	309761	64.4343	YDL081C	-2.1849	No	Yes	No	1.80912	PFK2
0.197128	483.082	4	323444	323470	95.2288	snR63	-0.705252	No	Yes	No	1.97877	PFK2
0.580461	254.691	4	330465	330487	147.838	YDL072C	-0.236227	No	Yes	No	2.16979	PFK2
0.0106851	1308.79	4	340543	340572	13.9845	YDL061C	-1.97122	No	Yes	No	1.14565	PFK2
0.0183368	4875.55	4	556429	556445	89.4019	YDR050C	-1.73668	No	Yes	No	1.95135	PFK2
1.55628	105.557	4	713366	713384	164.276	YDR129C	0.192087	No	Yes	No	2.21557	PFK2
0.101238	936.529	4	1257040	1257056	94.8126	tG(CCC)D	-0.994655	No	Yes	No	1.97687	PFK2
0.0188019	15071.9	4	1489554	1489573	283.381	YDR524C-B	-1.7258	No	Yes	No	2.45237	PFK2
0.891834	452.134	4	1492666	1492686	403.229	snR84	-0.0497159	No	Yes	No	2.60555	PFK2
1.65753	46.0451	5	330297	330317	76.321	YER086W	0.219461	No	Yes	No	1.88264	PFK2
0.0373747	4087.75	5	424748	424764	152.779	snR4	-1.42742	No	Yes	No	2.18406	PFK2
0.0399047	1167.13	5	441993	442019	46.5739	SCR1	-1.39898	No	Yes	No	1.66814	PFK2
0.141146	1167.13	5	442417	442446	164.736	SCR1	-0.85033	Yes	Yes	No	2.21679	PFK2	FBA1
0.153294	1054.28	5	139264	139283	161.615	YEL009C	-0.814475	No	Yes	No	2.20848	PFK2
0.780315	155.198	2	479076	479099	121.103	YBR119W	-0.10773	No	Yes	No	2.08316	PFK2
0.0312619	5766.15	5	431184	431204	180.26	snR52	-1.50499	No	Yes	No	2.2559	PFK2
0.0179578	3729.2	6	75568	75585	66.9682	YFL031W	-1.74575	No	Yes	No	1.82587	PFK2
3.4197	8.10585	6	84002	84031	27.7196	YFL026W	0.533988	No	Yes	No	1.44279	PFK2
0.0116729	6132.86	6	107638	107658	71.5881	YFL014W	-1.93282	No	Yes	No	1.85484	PFK2
0.912427	121.612	2	557941	557963	110.962	YBR158W	-0.0398018	No	Yes	No	2.04517	PFK2
0.359664	133.513	7	316964	316994	48.0198	YGL098W	-0.444103	No	Yes	No	1.68142	PFK2
0.0756704	2403.59	2	605532	605557	181.88	YBR189W	-1.12107	No	Yes	No	2.25979	PFK2
0.0135575	9268.22	7	439062	439084	125.654	YGL030W	-1.86782	No	Yes	No	2.09917	PFK2
0.0144287	9268.22	7	439685	439711	133.728	YGL030W	-1.84077	No	Yes	No	2.12622	PFK2
0.158823	1186.6	7	545534	545557	188.46	snR46	-0.799086	No	Yes	No	2.27522	PFK2
0.0271722	2271.58	7	556737	556762	61.7238	YGR034W	-1.56588	No	Yes	No	1.79045	PFK2
1.0411	86.3921	7	601206	601228	89.9429	YGR055W	0.0174929	No	Yes	No	1.95397	PFK2
0.0851561	353.863	7	365162	365188	30.1336	YGL076C	-1.06978	No	Yes	No	1.47905	PFK2
0.117108	43.3599	7	442971	442993	5.0778	YGL028C	-0.931413	No	Yes	No	0.705676	PFK2
0.358488	318.156	7	479546	479566	114.055	YGL008C	-0.445525	Yes	Yes	No	2.05712	PFK2	ENO1
0.0494496	318.156	7	479807	479841	15.7327	YGL008C	-1.30584	No	Yes	No	1.1968	PFK2
0.592002	368.864	7	649506	649533	218.369	YGR086C	-0.227677	No	Yes	No	2.33919	PFK2
0.341625	4930.59	7	882765	882788	1684.41	YGR192C	-0.46645	No	Yes	No	3.22645	PFK2
0.0147133	4930.59	7	882930	882950	72.5454	YGR192C	-1.83229	No	Yes	No	1.86061	PFK2
0.0801319	939.577	7	939560	939578	75.2901	snR7-L	-1.09619	No	Yes	No	1.87674	PFK2
0.0104109	17110.8	8	75859	75877	178.138	YHL015W	-1.98251	No	Yes	No	2.25076	PFK2
0.0444697	1726.81	8	451972	451989	76.7907	YHR174W	-1.35194	No	Yes	No	1.88531	PFK2
4.33272	36.859	8	467033	467054	159.7	YHR180W-A	0.636761	Yes	Yes	No	2.2033	PFK2	FBA1
0.710441	354.848	10	121765	121785	252.098	YJL159W	-0.148472	Yes	Yes	No	2.40157	PFK2	FBA1
0.158823	354.848	10	121912	121937	56.358	YJL159W	-0.799087	No	Yes	No	1.75096	PFK2
0.0122902	2993.68	10	74855	74879	36.7929	YJL190C	-1.91044	No	Yes	No	1.56576	PFK2
0.750384	1333.01	10	139818	139837	1000.27	snR190	-0.124716	No	Yes	No	3.00012	PFK2
0.0948345	1556.88	10	228424	228449	147.646	snR37	-1.02303	No	Yes	No	2.16922	PFK2
0.983242	122.25	11	101687	101708	120.201	YKL182W	-0.0073397	No	Yes	No	2.07991	PFK2
1.04078	122.25	11	105988	106007	127.235	YKL182W	0.0173584	No	Yes	No	2.10461	PFK2
0.000661199	12400.7	11	259617	259653	8.1993	YKL096W-A	-3.17967	No	Yes	No	0.913777	PFK2
0.00267897	573.541	14	518182	518213	1.5365	YNL055C	-2.57203	No	Yes	No	0.186533	FBA1
0.00543465	2924.57	2	681646	681681	15.894	LSR1	-2.26483	No	Yes	No	1.20123	FBA1
0.0389128	2924.57	2	681762	681780	113.803	LSR1	-1.40991	Yes	Yes	No	2.05615	FBA1	PFK2
0.0140874	2924.57	2	681793	681827	41.1997	LSR1	-1.85117	No	Yes	No	1.61489	FBA1
0.0318835	3640.13	15	445886	445913	116.06	YOR063W	-1.49643	No	Yes	No	2.06468	FBA1
3.3777	58.187	15	512815	512829	196.538	YOR099W	0.528622	No	Yes	No	2.29345	FBA1
1.77075	57.8689	15	577680	577699	102.471	YOR133W	0.248157	No	Yes	No	2.0106	FBA1
4.22182	37.4194	15	725000	725022	157.978	YOR204W	0.625499	No	Yes	No	2.1986	FBA1
0.389223	66.1261	15	780493	780510	25.7378	snR17a	-0.409801	Yes	Yes	No	1.41057	FBA1	PFK2
0.0438058	4363.82	15	832334	832363	191.161	snR8	-1.35847	No	Yes	No	2.2814	FBA1
0.0741566	2445.56	15	842419	842441	181.355	snR5	-1.12985	No	Yes	No	2.25853	FBA1
0.00233718	7725.08	15	408002	408020	18.0549	snR9	-2.63131	No	Yes	No	1.2566	FBA1
0.534989	7725.08	15	408109	408129	4132.83	snR9	-0.271655	No	Yes	No	3.61625	FBA1
8.75429	170.221	15	409821	409845	1490.16	snR62	0.942221	Yes	Yes	No	3.17323	FBA1	ENO1
0.393304	1156.11	15	680750	680777	454.704	snR36	-0.405271	No	Yes	No	2.65773	FBA1
0.00390412	1156.11	15	680837	680865	4.5136	snR36	-2.40848	No	Yes	No	0.654523	FBA1
2.02773	87.7371	15	718595	718622	177.907	YOR198C	0.307011	No	Yes	No	2.25019	FBA1
0.000152896	8793.58	15	759420	759448	1.3445	snR35	-3.8156	No	Yes	No	0.128561	FBA1
0.227937	167.69	16	24260	24279	38.2226	YPL274W	-0.642186	No	Yes	No	1.58232	FBA1
0.575882	123.322	16	109876	109905	71.0191	YPL231W	-0.239666	No	Yes	No	1.85138	FBA1
1.17084	123.322	16	110006	110025	144.391	YPL231W	0.0684985	No	Yes	No	2.15954	FBA1
1.06454	123.322	16	113702	113721	131.282	YPL231W	0.0271636	No	Yes	No	2.11821	FBA1
0.970705	123.322	16	113844	113869	119.71	YPL231W	-0.0129126	No	Yes	No	2.07813	FBA1
0.00741915	2543.58	16	303164	303181	18.8712	YPL131W	-2.12965	No	Yes	No	1.2758	FBA1
0.411113	362.431	16	465700	465721	149	YPL048W	-0.386038	No	Yes	No	2.17319	FBA1
0.314191	2447.33	16	821880	821901	768.931	snR45	-0.502806	No	Yes	No	2.88589	FBA1
6.87415	6.60115	16	478019	478038	45.3773	YPL040C	0.837219	No	Yes	No	1.65684	FBA1
0.234631	426.908	16	550830	550854	100.166	YPL004C	-0.629614	No	Yes	No	2.00072	FBA1
0.171729	765.297	16	718717	718738	131.424	snR51	-0.765156	No	Yes	No	2.11867	FBA1
0.343561	765.297	16	718766	718787	262.926	snR51	-0.463997	No	Yes	No	2.41983	FBA1
1.14134	1804.08	16	719159	719186	2059.07	snR41	0.057415	No	Yes	No	3.31367	FBA1
0.0945616	1804.08	16	719213	719242	170.596	snR41	-1.02429	No	Yes	No	2.23197	FBA1
9952.02	0.0204	mt	8167	8193	203.021	NULL	3.99791	No	Yes	No	2.30754	FBA1	*
0.144268	2113.55	3	178629	178660	304.916	snR189	-0.840831	Yes	Yes	No	2.48418	FBA1	ENO1
0.00293536	228.933	4	78523	78556	0.672	YDL212W	-2.53234	No	Yes	No	-0.172631	FBA1
3.04315	94.0435	4	129499	129522	286.188	YDL185W	0.483323	No	Yes	No	2.45665	FBA1
0.054204	2003.86	4	580456	580485	108.617	YDR064W	-1.26597	No	Yes	No	2.0359	FBA1
0.00390477	12112.9	4	1239852	1239875	47.2979	YDR382W	-2.4084	No	Yes	No	1.67484	FBA1
0.032833	1618.99	4	1302118	1302154	53.1562	YDR418W	-1.48369	Yes	Yes	No	1.72555	FBA1	PFK2
6.21184	16.4575	4	1385403	1385422	102.231	YDR461W	0.79322	No	Yes	No	2.00958	FBA1
0.0999705	1965.49	4	1402925	1402950	196.491	snR13	-1.00013	No	Yes	No	2.29334	FBA1
0.506615	1965.49	4	1403017	1403044	995.747	snR13	-0.295322	No	Yes	No	2.99815	FBA1
0.00993262	16103.4	4	221565	221588	159.949	YDL133C-A	-2.00294	No	Yes	No	2.20398	FBA1
0.0191555	16103.4	4	221644	221672	308.469	YDL133C-A	-1.71771	Yes	Yes	No	2.48921	FBA1	PFK2
0.0481551	1235.48	4	306840	306869	59.4946	YDL083C	-1.31736	No	Yes	No	1.77448	FBA1
0.353856	483.082	4	323445	323466	170.941	snR63	-0.451174	No	Yes	No	2.23285	FBA1
0.583893	254.691	4	330466	330487	148.712	YDL072C	-0.233667	No	Yes	No	2.17235	FBA1
0.0141232	4875.55	4	556429	556448	68.8582	YDR050C	-1.85007	No	Yes	No	1.83796	FBA1
17.3379	16.5093	4	1154137	1154159	286.237	YDR342C	1.239	No	Yes	No	2.45673	FBA1
0.23013	1043.29	4	1445218	1445241	240.092	YDR497C	-0.638027	No	Yes	No	2.38038	FBA1
0.0147879	15071.9	4	1489533	1489551	222.881	YDR524C-B	-1.83009	No	Yes	No	2.34807	FBA1
0.577748	452.134	4	1492666	1492687	261.219	snR84	-0.238262	No	Yes	No	2.41701	FBA1
0.0522584	3316.71	5	61392	61421	173.326	snR67	-1.28184	No	Yes	No	2.23886	FBA1
3.82932	46.0451	5	330297	330321	176.321	YER086W	0.583121	No	Yes	No	2.2463	FBA1
0.0150595	4087.75	5	424748	424763	61.5594	snR4	-1.82219	No	Yes	No	1.78929	FBA1
0.161641	4087.75	5	424859	424879	660.747	snR4	-0.791449	No	Yes	No	2.82004	FBA1
0.0485139	1167.13	5	441988	442004	56.622	SCR1	-1.31413	No	Yes	No	1.75299	FBA1
0.0960264	1167.13	5	442417	442446	112.075	SCR1	-1.01761	Yes	Yes	No	2.04951	FBA1	PFK2
0.188471	385.67	5	52232	52259	72.6875	snR80	-0.724756	No	Yes	No	1.86146	FBA1
0.0034868	330.475	5	207550	207570	1.1523	YER026C	-2.45757	No	Yes	No	0.0615656	FBA1
0.197244	317.94	5	236137	236156	62.7118	YER043C	-0.704996	No	Yes	No	1.79735	FBA1
0.160508	547.171	2	300993	301017	87.8254	YBR031W	-0.794503	No	Yes	No	1.94362	FBA1
0.0948635	5766.15	5	431146	431168	546.997	snR52	-1.0229	No	Yes	No	2.73798	FBA1
0.351024	5766.15	5	431174	431195	2024.06	snR52	-0.454663	No	Yes	No	3.30622	FBA1
0.0239252	116.405	6	57727	57752	2.785	YFL037W	-1.62115	No	Yes	No	0.444825	FBA1
0.0295641	3729.2	6	76203	76230	110.25	YFL031W	-1.52924	No	Yes	No	2.04238	FBA1
1.51652	8.10585	6	83996	84031	12.2927	YFL026W	0.180849	No	Yes	No	1.08965	FBA1
0.247469	143.588	6	253530	253561	35.5335	YFR052C-A	-0.606479	No	Yes	No	1.55064	FBA1
3.13878	44.1514	7	88183	88205	138.581	YGL215W	0.49676	No	Yes	No	2.1417	FBA1
3.43639	73.0533	7	214382	214404	251.04	YGL155W	0.536102	No	Yes	No	2.39974	FBA1
3.05851	41.7146	7	273824	273857	127.585	YGL125W	0.485509	No	Yes	No	2.1058	FBA1
1.68363	133.513	7	316919	316943	224.786	YGL098W	0.226247	No	Yes	No	2.35177	FBA1
0.194019	3595.62	7	346102	346125	697.618	YGL088W	-0.712157	No	Yes	No	2.84362	FBA1
0.0345205	9268.22	7	439063	439084	319.943	YGL030W	-1.46192	No	Yes	No	2.50507	FBA1
1.14747	1191.85	7	609614	609635	1367.61	snR48	0.0597407	No	Yes	No	3.13596	FBA1
0.410356	331.859	2	394008	394031	136.18	YBR078W	-0.386839	No	Yes	No	2.13411	FBA1
0.350235	353.863	7	365160	365188	123.935	YGL076C	-0.45564	No	Yes	No	2.0932	FBA1
1.32247	523.342	7	366381	366406	692.105	snR39B	0.121386	No	Yes	No	2.84017	FBA1
0.050189	523.342	7	366430	366467	26.266	snR39B	-1.29939	No	Yes	No	1.41939	FBA1
3.63238	43.3599	7	442972	442993	157.5	YGL028C	0.560192	No	Yes	No	2.19728	FBA1
0.581822	318.156	7	479424	479453	185.11	YGL008C	-0.23521	No	Yes	No	2.26743	FBA1
0.266536	318.156	7	479469	479495	84.8002	YGL008C	-0.574243	No	Yes	No	1.9284	FBA1
0.829945	318.156	7	479545	479566	264.052	YGL008C	-0.0809505	No	Yes	No	2.42169	FBA1
0.00180195	318.156	7	480001	480017	0.5733	YGL008C	-2.74426	No	Yes	No	-0.241618	FBA1
0.272875	318.156	7	482630	482658	86.8169	YGL008C	-0.564036	No	Yes	No	1.9386	FBA1
1.91333	121.612	2	557942	557963	232.684	YBR158W	0.28179	No	Yes	No	2.36677	FBA1
8.10208	12.4753	7	850220	850240	101.076	YGR177C	0.908597	No	Yes	No	2.00465	FBA1
0.122495	4930.59	7	882765	882789	603.971	YGR192C	-0.911882	No	Yes	No	2.78102	FBA1
0.147363	4930.59	7	882931	882950	726.586	YGR192C	-0.831611	Yes	Yes	No	2.86129	FBA1	ENO1
0.200694	939.577	7	939544	939567	188.568	snR7-L	-0.697465	No	Yes	No	2.27547	FBA1
0.17182	764.907	7	1048695	1048712	131.426	YGR279C	-0.764926	No	Yes	No	2.11868	FBA1
0.00456307	17110.8	8	75858	75877	78.0777	YHL015W	-2.34074	No	Yes	No	1.89253	FBA1
4.49712	36.859	8	467033	467054	165.759	YHR180W-A	0.652934	Yes	Yes	No	2.21948	FBA1	PFK2
0.204674	438.952	2	775134	775155	89.8421	YBR286W	-0.688937	No	Yes	No	1.95348	FBA1
0.22054	354.848	10	121765	121785	78.2583	YJL159W	-0.656512	Yes	Yes	No	1.89353	FBA1	PFK2
0.640577	141.676	10	383440	383467	90.7544	YJL034W	-0.193429	No	Yes	No	1.95787	FBA1
0.253913	2066.99	1	142376	142405	524.836	YAL003W	-0.595316	No	Yes	No	2.72002	FBA1
0.0422697	7628.23	10	663837	663859	322.443	snR3	-1.37397	No	Yes	No	2.50845	FBA1
0.0970411	2993.68	10	74856	74879	290.51	YJL190C	-1.01304	Yes	Yes	No	2.46316	FBA1	ENO1
0.0909395	3005.7	10	139591	139615	273.337	snR128	-1.04125	No	Yes	No	2.4367	FBA1
0.00582942	3005.7	10	139643	139670	17.5215	snR128	-2.23437	No	Yes	No	1.24357	FBA1
0.074242	1333.01	10	139817	139837	98.9656	snR190	-1.12935	No	Yes	No	1.99548	FBA1
1.39955	1333.01	10	139908	139930	1865.62	snR190	0.145989	No	Yes	No	3.27082	FBA1
0.0557635	1556.88	10	228203	228233	86.817	snR37	-1.25365	No	Yes	No	1.9386	FBA1
0.0885184	1556.88	10	228285	228316	137.812	snR37	-1.05297	No	Yes	No	2.13929	FBA1
0.0167395	1556.88	10	228419	228441	26.0614	snR37	-1.77626	No	Yes	No	1.416	FBA1
0.124487	77.1463	10	433534	433569	9.6037	YJL002C	-0.904877	No	Yes	No	0.982439	FBA1
0.205575	520.625	10	453802	453821	107.028	YJR009C	-0.68703	No	Yes	No	2.0295	FBA1
0.126694	2839.77	11	38840	38861	359.781	snR64	-0.897245	No	Yes	No	2.55604	FBA1
0.199535	122.25	11	105976	106007	24.3932	YKL182W	-0.69998	No	Yes	No	1.38727	FBA1
0.159586	1652.16	11	110205	110228	263.661	YKL180W	-0.797006	No	Yes	No	2.42105	FBA1
1.0561	328.16	11	283240	283261	346.57	YKL081W	0.0237045	No	Yes	No	2.53979	FBA1
5.50723	15.2498	2	191719	191738	83.9839	YBL017C	0.740933	No	Yes	No	1.9242	FBA1
0.101171	2066.99	1	143164	143197	209.12	YAL003W	-0.994944	No	Yes	No	2.3204	FBA1
0.0947394	1266.59	11	559218	559248	119.996	snR42	-1.02347	No	Yes	No	2.07917	FBA1
0.15401	1266.59	11	559265	559283	195.068	snR42	-0.81245	No	Yes	No	2.29019	FBA1
0.01231	2305.34	12	198871	198886	28.3788	snR30	-1.90974	No	Yes	No	1.45299	FBA1
0.167153	2305.34	12	199022	199045	385.344	snR30	-0.776885	No	Yes	No	2.58585	FBA1
0.471573	2305.34	12	199197	199217	1087.14	snR30	-0.326451	No	Yes	No	3.03628	FBA1
0.0375342	2305.34	12	199304	199337	86.5289	snR30	-1.42557	No	Yes	No	1.93716	FBA1
0.0247206	4419.02	12	369339	369363	109.241	YLR109W	-1.60694	No	Yes	No	2.03839	FBA1
4.25381	21.7832	12	411607	411627	92.6615	YLR134W	0.628778	No	Yes	No	1.9669	FBA1
0.574915	339.185	12	638557	638573	195.002	YLR249W	-0.240396	No	Yes	No	2.29004	FBA1
0.48232	339.185	12	639616	639635	163.596	YLR249W	-0.316664	No	Yes	No	2.21377	FBA1
0.363403	561.84	12	856823	856844	204.174	YLR367W	-0.439612	No	Yes	No	2.31	FBA1
0.123931	2638.91	12	899289	899308	327.043	snR34	-0.90682	No	Yes	No	2.5146	FBA1
0.0691648	794.76	12	1029961	1029985	54.9694	YLR448W	-1.16012	No	Yes	No	1.74012	FBA1
0.356277	2410.9	12	233176	233196	858.951	YLR044C	-0.448212	Yes	Yes	No	2.93397	FBA1	ENO1
4.6376	2.96125	12	592558	592577	13.7331	tL(UAG)L1	0.666294	No	Yes	No	1.13777	FBA1
1.08559	460.46	12	709484	709508	499.869	YLR286C	0.0356642	No	Yes	No	2.69886	FBA1
0.168957	1511.1	12	794544	794561	255.311	snR61	-0.772224	No	Yes	No	2.40707	FBA1
0.332231	1347.04	12	1018018	1018042	447.529	YLR441C	-0.47856	No	Yes	No	2.65082	FBA1
0.222817	1347.04	12	1018064	1018089	300.144	YLR441C	-0.652051	No	Yes	No	2.47733	FBA1
0.014569	46.146	13	70708	70736	0.6723	YML100W	-1.83657	No	Yes	No	-0.172437	FBA1
0.0532961	2579.47	13	297779	297808	137.476	snR76	-1.2733	No	Yes	No	2.13823	FBA1
0.116953	1307.28	13	298362	298383	152.89	snR73	-0.931989	No	Yes	No	2.18438	FBA1
3.88357	57.7916	13	426147	426171	224.437	YMR079W	0.589231	No	Yes	No	2.3511	FBA1
0.00119859	841.153	13	552926	552948	1.0082	YMR143W	-2.92133	No	Yes	No	0.00354669	FBA1
0.527172	268.068	2	613867	613896	141.318	YBR196C	-0.278048	No	Yes	No	2.1502	FBA1
7.40847	10.8951	13	65180	65197	80.716	YML103C	0.869728	No	Yes	No	1.90696	FBA1
15.7672	15.1024	13	117625	117648	238.123	YML075C	1.19775	No	Yes	No	2.3768	FBA1
1.13702	237.15	13	163532	163553	269.644	YML056C	0.0557668	No	Yes	No	2.43079	FBA1
5.06639	237.15	13	163583	163608	1201.5	YML056C	0.704699	No	Yes	No	3.07972	FBA1
0.104435	864.405	13	762169	762188	90.2744	snR86	-0.981153	No	Yes	No	1.95556	FBA1
0.462348	864.405	13	762499	762519	399.656	snR86	-0.335031	No	Yes	No	2.60169	FBA1
0.301973	864.405	13	763031	763051	261.027	snR86	-0.520031	No	Yes	No	2.41669	FBA1
0.000898434	1282.56	13	808265	808298	1.1523	tQ(CUG)M	-3.04651	No	Yes	No	0.0615656	FBA1
0.140083	3424.08	14	89233	89246	479.654	snR40	-0.853616	No	Yes	No	2.68093	FBA1
0.261419	3424.08	14	89264	89273	895.118	snR40	-0.582663	No	Yes	No	2.95188	FBA1
5.43975	2924.57	2	680712	680733	15908.9	LSR1	0.735579	No	Yes	No	4.20164	FBA1
8.08379	19.7745	14	93103	93126	159.852	YNL287W	0.907615	No	Yes	No	2.20372	FBA1
0.418686	228	14	283456	283484	95.4603	YNL190W	-0.378111	No	Yes	No	1.97982	FBA1
0.0447579	2924.57	2	680885	680904	130.898	LSR1	-1.34913	No	Yes	No	2.11693	FBA1
3.63891	105.329	14	585768	585790	383.282	NME1	0.560971	No	Yes	No	2.58352	FBA1
2.22256	105.329	14	585898	585923	234.1	NME1	0.346854	No	Yes	No	2.3694	FBA1
0.0541568	917.581	14	586159	586175	49.6933	snR66	-1.26635	No	Yes	No	1.6963	FBA1
0.194104	2924.57	2	681076	681100	567.672	LSR1	-0.711964	No	Yes	No	2.7541	FBA1
0.683015	601.586	14	716166	716191	410.892	snR49	-0.16557	No	Yes	No	2.61373	FBA1
0.0066999	3934.68	14	230347	230383	26.362	snR19	-2.17393	No	Yes	No	1.42098	FBA1
0.000170814	3934.68	14	230386	230414	0.6721	snR19	-3.76748	No	Yes	No	-0.172566	FBA1
0.0151693	3934.68	14	230562	230591	59.6866	snR19	-1.81903	No	Yes	No	1.77588	FBA1
0.0174319	77.1286	14	292114	292134	1.3445	YNL185C	-1.75865	No	Yes	No	0.128561	FBA1
0.0618634	2839.77	11	38846	38871	175.678	snR64	-1.20857	No	Yes	No	2.24472	ENO1
0.757557	122.25	11	101687	101707	92.6114	YKL182W	-0.120584	No	Yes	No	1.96666	ENO1
0.0643826	1652.16	11	110204	110228	106.37	YKL180W	-1.19123	No	Yes	No	2.02682	ENO1
0.0701704	12400.7	11	259630	259653	870.159	YKL096W-A	-1.15385	No	Yes	No	2.9396	ENO1
0.533245	328.16	11	283216	283241	174.99	YKL081W	-0.273073	No	Yes	No	2.24301	ENO1
11.4959	156.759	11	46740	46761	1802.09	tT(CGU)K	1.06054	No	Yes	No	3.25578	ENO1
0.00199803	3436.19	11	327358	327376	6.8656	YKL060C	-2.6994	No	Yes	No	0.836678	ENO1
0.354895	1266.59	11	559218	559241	449.506	snR42	-0.4499	No	Yes	No	2.65274	ENO1
0.205981	1266.59	11	559265	559285	260.894	snR42	-0.686172	No	Yes	No	2.41646	ENO1
0.0744837	2305.34	12	198875	198902	171.71	snR30	-1.12794	No	Yes	No	2.2348	ENO1
0.058733	2305.34	12	199018	199039	135.399	snR30	-1.23112	No	Yes	No	2.13162	ENO1
0.306199	2305.34	12	199196	199217	705.892	snR30	-0.513996	No	Yes	No	2.84874	ENO1
0.0210742	4419.02	12	369340	369363	93.1273	YLR109W	-1.67625	No	Yes	No	1.96908	ENO1
3.63964	21.7832	12	411606	411627	79.2831	YLR134W	0.561059	No	Yes	No	1.89918	ENO1
0.0899425	1013.42	12	441352	441371	91.1496	YLR150W	-1.04603	No	Yes	No	1.95975	ENO1
0.695913	339.185	12	638548	638573	236.043	YLR249W	-0.157445	No	Yes	No	2.37299	ENO1
0.772981	339.185	12	639615	639635	262.183	YLR249W	-0.111831	Yes	Yes	No	2.41861	ENO1	PFK2
0.0222884	2638.91	12	899180	899203	58.8172	snR34	-1.65192	No	Yes	No	1.7695	ENO1
0.0618332	2638.91	12	899285	899305	163.172	snR34	-1.20878	No	Yes	No	2.21265	ENO1
0.0978706	2410.9	12	232366	232385	235.957	YLR044C	-1.00935	No	Yes	No	2.37283	ENO1
0.230069	2410.9	12	233176	233196	554.674	YLR044C	-0.638143	Yes	Yes	No	2.74404	ENO1	FBA1
0.00941045	93527	12	369648	369673	880.131	YLR110C	-2.02639	No	Yes	No	2.94455	ENO1
7.61278e-05	93527	12	369978	369997	7.12	YLR110C	-4.11846	No	Yes	No	0.85248	ENO1
1.01636	2.96125	12	592557	592577	3.0097	tL(UAG)L1	0.00704813	No	Yes	No	0.478523	ENO1
0.208224	460.46	12	709483	709508	95.879	YLR286C	-0.681468	Yes	Yes	No	1.98172	ENO1	PFK2
0.192357	1511.1	12	794545	794574	290.67	snR61	-0.715893	No	Yes	No	2.4634	ENO1
0.0687517	1347.04	12	1018017	1018042	92.6114	YLR441C	-1.16272	Yes	Yes	No	1.96666	ENO1	PFK2
0.0592401	1347.04	12	1018059	1018089	79.7989	YLR441C	-1.22738	Yes	Yes	No	1.902	ENO1	PFK2
0.461911	1202.98	13	220753	220779	555.669	YML028W	-0.335442	No	Yes	No	2.74482	ENO1
0.230628	989.179	13	226712	226744	228.132	YML024W	-0.637089	No	Yes	No	2.35819	ENO1
0.0795201	2579.47	13	297771	297793	205.12	snR76	-1.09952	No	Yes	No	2.31201	ENO1
0.0786044	1307.28	13	298356	298383	102.758	snR73	-1.10455	No	Yes	No	2.01182	ENO1
0.858539	57.7916	13	426146	426171	49.6163	YMR079W	-0.06624	No	Yes	No	1.69562	ENO1
0.215285	841.153	13	552927	552948	181.088	YMR143W	-0.666986	No	Yes	No	2.25789	ENO1
0.243793	358.008	13	632958	632978	87.28	YMR186W	-0.612978	No	Yes	No	1.94091	ENO1
0.0319723	693.41	13	651948	651969	22.1699	YMR194W	-1.49523	No	Yes	No	1.34576	ENO1
0.0420403	4035.61	13	652439	652463	169.659	snR11	-1.37633	No	Yes	No	2.22958	ENO1
10.0846	8.65475	13	707353	707378	87.28	YMR219W	1.00366	No	Yes	No	1.94091	ENO1
0.0634	9692.2	13	775089	775113	614.486	YMR251W-A	-1.19791	No	Yes	No	2.78851	ENO1
1.99396	44.0309	13	11754	11775	87.7959	YML130C	0.299717	Yes	Yes	No	1.94347	ENO1	FBA1
0.347665	237.15	13	163535	163556	82.4489	YML056C	-0.458839	No	Yes	No	1.91618	ENO1
0.66819	237.15	13	163584	163611	158.461	YML056C	-0.1751	No	Yes	No	2.19992	ENO1
0.979179	252.347	2	591669	591688	247.093	YBR181C	-0.00913806	No	Yes	No	2.39286	ENO1
0.0600852	864.405	13	762161	762188	51.938	snR86	-1.22123	No	Yes	No	1.71549	ENO1
0.165279	864.405	13	762500	762519	142.868	snR86	-0.781782	No	Yes	No	2.15494	ENO1
0.457467	864.405	13	763031	763055	395.437	snR86	-0.33964	No	Yes	No	2.59708	ENO1
0.549692	268.068	2	613868	613896	147.355	YBR196C	-0.259881	No	Yes	No	2.16836	ENO1
0.15929	1282.56	13	808256	808280	204.299	tQ(CUG)M	-0.797813	No	Yes	No	2.31027	ENO1
0.057183	3424.08	14	89234	89245	195.799	snR40	-1.24273	No	Yes	No	2.29181	ENO1
0.174388	3424.08	14	89262	89287	597.119	snR40	-0.758483	No	Yes	No	2.77606	ENO1
4.73991	19.7745	14	93104	93126	93.7292	YNL287W	0.67577	No	Yes	No	1.97187	ENO1
1.37661	420.058	14	255063	255091	578.254	YNL208W	0.13881	No	Yes	No	2.76212	ENO1
0.68764	2924.57	2	680705	680722	2011.05	LSR1	-0.162639	No	Yes	No	3.30342	ENO1
0.0501714	2066.99	1	142368	142389	103.704	YAL003W	-1.29954	No	Yes	No	2.0158	ENO1
0.0704649	2924.57	2	680883	680904	206.079	LSR1	-1.15203	No	Yes	No	2.31403	ENO1
0.813947	105.329	14	585761	585791	85.7321	NME1	-0.0894037	No	Yes	No	1.93314	ENO1
0.16681	917.581	14	586141	586165	153.062	snR66	-0.777777	No	Yes	No	2.18487	ENO1
0.094265	2924.57	2	681085	681085	275.684	LSR1	-1.02565	No	Yes	No	2.44041	ENO1
0.17217	601.586	14	716167	716190	103.575	snR49	-0.764043	No	Yes	No	2.01525	ENO1
0.0753289	601.586	14	716249	716267	45.3168	snR49	-1.12304	No	Yes	No	1.65626	ENO1
0.013654	3934.68	14	230369	230394	53.724	snR19	-1.86474	No	Yes	No	1.73017	ENO1
0.380788	3934.68	14	230560	230590	1498.28	snR19	-0.419317	No	Yes	No	3.17559	ENO1
0.966614	77.1286	14	292114	292135	74.5535	YNL185C	-0.0147471	No	Yes	No	1.87247	ENO1
0.00179917	573.541	14	518196	518215	1.0319	YNL055C	-2.74493	No	Yes	No	0.0136376	ENO1
0.760323	2924.57	2	681526	681545	2223.62	LSR1	-0.119002	No	Yes	No	3.34706	ENO1
0.0481181	2924.57	2	681647	681669	140.725	LSR1	-1.31769	No	Yes	No	2.14837	ENO1
0.0951398	1860.08	15	110725	110751	176.968	YOL109W	-1.02164	No	Yes	No	2.24789	ENO1
0.0725659	2924.57	2	681763	681776	212.224	LSR1	-1.13927	No	Yes	No	2.32679	ENO1
0.0515923	3640.13	15	445887	445913	187.802	YOR063W	-1.28742	No	Yes	No	2.2737	ENO1
1.92117	58.187	15	512806	512829	111.787	YOR099W	0.283566	No	Yes	No	2.04839	ENO1
0.0786584	2924.57	2	681792	681805	230.042	LSR1	-1.10425	No	Yes	No	2.36181	ENO1
1.84258	57.8689	15	577679	577699	106.628	YOR133W	0.265426	No	Yes	No	2.02787	ENO1
0.0643382	2924.57	2	681837	681858	188.161	LSR1	-1.19153	No	Yes	No	2.27453	ENO1
4.54086	37.4194	15	724999	725022	169.917	YOR204W	0.657138	No	Yes	No	2.23024	ENO1
1.47549	66.1261	15	780494	780510	97.5684	snR17a	0.168937	No	Yes	No	1.98931	ENO1
0.109933	7725.08	15	407993	408020	849.239	snR9	-0.958873	No	Yes	No	2.92903	ENO1
0.107594	7725.08	15	408110	408130	831.176	snR9	-0.96821	No	Yes	No	2.91969	ENO1
1.35977	170.221	15	409821	409845	231.461	snR62	0.133465	Yes	Yes	No	2.36448	ENO1	FBA1
0.00058244	2066.99	1	143169	143197	1.2039	YAL003W	-3.23475	No	Yes	No	0.0805904	ENO1
0.487631	580.874	15	594382	594402	283.252	tG(CCC)O	-0.311909	No	Yes	No	2.45217	ENO1
0.0480798	7768.5	15	648748	648773	373.508	YOR167C	-1.31804	No	Yes	No	2.5723	ENO1
0.16103	1156.11	15	680754	680777	186.169	snR36	-0.793093	No	Yes	No	2.26991	ENO1
0.0402389	1156.11	15	680836	680865	46.5207	snR36	-1.39535	No	Yes	No	1.66765	ENO1
1.78768	87.7371	15	718594	718622	156.846	YOR198C	0.25229	No	Yes	No	2.19547	ENO1
0.0100134	8793.58	15	759420	759443	88.0539	snR35	-1.99942	No	Yes	No	1.94475	ENO1
0.478949	167.69	16	24257	24279	80.3148	YPL274W	-0.319711	No	Yes	No	1.9048	ENO1
0.142713	1409.34	16	30309	30330	201.131	YPL271W	-0.845535	No	Yes	No	2.30348	ENO1
0.0461272	1696.42	3	137712	137739	78.251	YCR012W	-1.33604	No	Yes	No	1.89349	ENO1
1.33846	71.5051	16	47781	47810	95.707	YPL262W	0.126607	No	Yes	No	1.98094	ENO1
1.20908	123.322	16	109877	109905	149.107	YPL231W	0.0824561	No	Yes	No	2.1735	ENO1
0.588504	123.322	16	110005	110025	72.5757	YPL231W	-0.23025	No	Yes	No	1.86079	ENO1
0.628249	123.322	16	113701	113721	77.4771	YPL231W	-0.201868	No	Yes	No	1.88917	ENO1
1.42251	123.322	16	113845	113869	175.427	YPL231W	0.153054	No	Yes	No	2.2441	ENO1
0.243191	362.431	16	465702	465721	88.1399	YPL048W	-0.614053	No	Yes	No	1.94517	ENO1
0.0838918	498.156	16	624308	624331	41.7912	YPR028W	-1.07628	No	Yes	No	1.62108	ENO1
4.69455	263.443	16	702004	702027	1236.75	YPR080W	0.671594	No	Yes	No	3.09228	ENO1
1.22981	69.2923	3	218018	218042	85.2162	YCR053W	0.0898372	No	Yes	No	1.93052	ENO1
0.0673646	2447.33	16	821881	821901	164.864	snR45	-1.17157	No	Yes	No	2.21712	ENO1
0.141791	285.642	16	830290	830308	40.5013	YPR149W	-0.848352	No	Yes	No	1.60747	ENO1
13.998	11.6533	16	450416	450440	163.123	YPL058C	1.14607	No	Yes	No	2.21252	ENO1
0.244127	426.908	16	550829	550854	104.22	YPL004C	-0.612384	No	Yes	No	2.01795	ENO1
1.16571	765.297	16	718777	718806	892.114	snR51	0.0665902	No	Yes	No	2.95042	ENO1
0.263489	1804.08	16	719158	719186	475.354	snR41	-0.579238	No	Yes	No	2.67702	ENO1
0.577541	1804.08	16	719205	719241	1041.93	snR41	-0.238417	No	Yes	No	3.01784	ENO1
33.7255	0.0204	mt	58182	58207	0.688	NULL	1.52796	No	Yes	No	-0.162412	ENO1	*
0.152652	950.865	3	163064	163085	145.151	YCR024C-B	-0.816297	No	Yes	No	2.16182	ENO1
0.000244092	2113.55	3	178629	178660	0.5159	snR189	-3.61245	Yes	Yes	No	-0.287434	ENO1	FBA1
0.36472	228.933	4	78522	78557	83.4964	YDL212W	-0.43804	Yes	Yes	No	1.92167	ENO1	PFK2
0.808564	224.184	4	118524	118551	181.267	YDL191W	-0.0922856	No	Yes	No	2.25832	ENO1
1.76055	94.0435	4	129499	129523	165.569	YDL185W	0.245649	No	Yes	No	2.21898	ENO1
0.358113	562.121	4	309453	309476	201.303	YDL082W	-0.44598	No	Yes	No	2.30385	ENO1
0.669421	90.0466	4	523038	523063	60.2791	YDR035W	-0.174301	No	Yes	No	1.78017	ENO1
0.503447	2003.86	4	580464	580485	1008.84	YDR064W	-0.298047	No	Yes	No	3.00382	ENO1
45.0513	2.20075	4	884462	884488	99.1466	tI(UAU)D	1.65371	No	Yes	No	1.99628	ENO1
0.0315768	12112.9	4	1239854	1239875	382.485	YDR382W	-1.50063	No	Yes	No	2.58261	ENO1
0.102297	1618.99	4	1302126	1302150	165.617	YDR418W	-0.990139	No	Yes	No	2.2191	ENO1
5.96172	16.4575	4	1385399	1385422	98.1147	YDR461W	0.775372	No	Yes	No	1.99173	ENO1
0.209975	1965.49	4	1402925	1402952	412.703	snR13	-0.677833	No	Yes	No	2.61564	ENO1
0.0341603	1965.49	4	1403017	1403042	67.1418	snR13	-1.46648	No	Yes	No	1.82699	ENO1
0.0254189	16103.4	4	221566	221588	409.332	YDL133C-A	-1.59484	No	Yes	No	2.61208	ENO1
0.0577131	16103.4	4	221645	221672	929.377	YDL133C-A	-1.23873	No	Yes	No	2.96819	ENO1
0.257801	1235.48	4	306841	306861	318.508	YDL083C	-0.588715	No	Yes	No	2.50312	ENO1
0.0112569	9863.19	4	309736	309763	111.029	YDL081C	-1.94858	No	Yes	No	2.04543	ENO1
0.086201	1308.79	4	340543	340575	112.819	YDL061C	-1.06449	No	Yes	No	2.05238	ENO1
2.50092	105.557	4	713365	713384	263.99	YDR129C	0.3981	No	Yes	No	2.42159	ENO1
7.95351	16.5093	4	1154130	1154159	131.307	YDR342C	0.900559	No	Yes	No	2.11829	ENO1
0.102285	936.529	4	1257036	1257056	95.793	tG(CCC)D	-0.990188	No	Yes	No	1.98133	ENO1
0.636912	1043.29	4	1445218	1445240	664.482	YDR497C	-0.19592	No	Yes	No	2.82248	ENO1
0.00856555	15071.9	4	1489533	1489569	129.099	YDR524C-B	-2.06724	No	Yes	No	2.11092	ENO1
0.238133	3316.71	5	61399	61420	789.819	snR67	-0.62318	No	Yes	No	2.89753	ENO1
4.53434	46.0451	5	330296	330321	208.784	YER086W	0.656514	No	Yes	No	2.3197	ENO1
0.16547	547.171	2	300994	301017	90.5404	YBR031W	-0.781281	No	Yes	No	1.95684	ENO1
0.0508715	4087.75	5	424860	424882	207.95	snR4	-1.29353	No	Yes	No	2.31796	ENO1
0.09659	1167.13	5	442416	442446	112.733	SCR1	-1.01507	No	Yes	No	2.05205	ENO1
0.173911	385.67	5	52228	52259	67.0723	snR80	-0.759673	No	Yes	No	1.82654	ENO1
0.181233	1054.28	5	139264	139288	191.07	YEL009C	-0.741764	No	Yes	No	2.28119	ENO1
0.63255	330.475	5	207550	207571	209.042	YER026C	-0.198905	No	Yes	No	2.32023	ENO1
0.00189312	317.94	5	236137	236154	0.6019	YER043C	-2.72282	No	Yes	No	-0.220476	ENO1
0.0553131	5766.15	5	431143	431168	318.944	snR52	-1.25717	No	Yes	No	2.50371	ENO1
0.0709613	5766.15	5	431174	431194	409.173	snR52	-1.14898	No	Yes	No	2.61191	ENO1
0.0103424	116.405	6	57718	57752	1.2039	YFL037W	-1.98538	No	Yes	No	0.0805904	ENO1
0.00115293	3729.2	6	75571	75585	4.2995	YFL031W	-2.9382	No	Yes	No	0.633418	ENO1
0.0369449	3729.2	6	76208	76230	137.775	YFL031W	-1.43244	No	Yes	No	2.13917	ENO1
0.490508	331.859	2	394009	394031	162.779	YBR078W	-0.309354	No	Yes	No	2.2116	ENO1
8.41206e-05	6132.86	6	107637	107658	0.5159	YFL014W	-4.0751	No	Yes	No	-0.287434	ENO1
0.63478	143.588	6	253534	253561	91.1465	YFR052C-A	-0.197377	No	Yes	No	1.95974	ENO1
2.73264	1458.23	1	73327	73351	3984.81	YAL038W	0.436583	No	Yes	No	3.60041	ENO1
0.145841	355.539	7	21435	21466	51.8521	YGL255W	-0.836121	No	Yes	No	1.71477	ENO1
1.96038	41.7146	7	273825	273857	81.7766	YGL125W	0.29234	No	Yes	No	1.91263	ENO1
4.80727	155.198	2	479063	479093	746.08	YBR119W	0.681899	No	Yes	No	2.87279	ENO1
0.339419	133.513	7	316917	316942	45.3168	YGL098W	-0.469264	No	Yes	No	1.65626	ENO1
1.38601	133.513	7	316963	316996	185.051	YGL098W	0.141767	No	Yes	No	2.26729	ENO1
0.0244892	3595.62	7	346102	346132	88.0539	YGL088W	-1.61103	No	Yes	No	1.94475	ENO1
0.0134252	9268.22	7	439686	439711	124.428	YGL030W	-1.87208	No	Yes	No	2.09492	ENO1
0.0542781	1186.6	7	545534	545565	64.4066	snR46	-1.26538	No	Yes	No	1.80893	ENO1
0.0996533	2271.58	7	556738	556762	226.371	YGR034W	-1.00151	No	Yes	No	2.35482	ENO1
1.00829	86.3921	7	601204	601228	87.108	YGR055W	0.00358401	No	Yes	No	1.94006	ENO1
0.0232318	1191.85	7	609615	609634	27.6889	snR48	-1.63392	No	Yes	No	1.44231	ENO1
1.09248	44.9439	7	881815	881836	49.1003	YGR191W	0.0384134	No	Yes	No	1.69108	ENO1
0.0372426	2403.59	2	605531	605561	89.5157	YBR189W	-1.42896	No	Yes	No	1.9519	ENO1
0.151847	523.342	7	366383	366408	79.4681	snR39B	-0.818593	No	Yes	No	1.90019	ENO1
0.153447	523.342	7	366429	366456	80.3055	snR39B	-0.81404	No	Yes	No	1.90475	ENO1
0.695668	318.156	7	479425	479447	221.331	YGL008C	-0.157598	No	Yes	No	2.34504	ENO1
2.17105	318.156	7	479470	479495	690.732	YGL008C	0.33667	No	Yes	No	2.83931	ENO1
2.25058	318.156	7	479546	479566	716.035	YGL008C	0.352294	Yes	Yes	No	2.85493	ENO1	PFK2
0.48205	318.156	7	479808	479829	153.367	YGL008C	-0.316908	No	Yes	No	2.18573	ENO1
0.278114	318.156	7	480015	480037	88.4838	YGL008C	-0.555777	No	Yes	No	1.94686	ENO1
0.716773	318.156	7	482629	482658	228.046	YGL008C	-0.144618	No	Yes	No	2.35802	ENO1
0.367865	368.864	7	649522	649536	135.692	YGR086C	-0.434311	No	Yes	No	2.13256	ENO1
6.45168	12.4753	7	850219	850245	80.4867	YGR177C	0.809673	No	Yes	No	1.90572	ENO1
0.728857	4930.59	7	882765	882790	3593.69	YGR192C	-0.137358	No	Yes	No	3.55554	ENO1
0.0709387	4930.59	7	882931	882950	349.769	YGR192C	-1.14912	Yes	Yes	No	2.54378	ENO1	FBA1
0.196302	438.952	2	775139	775155	86.1672	YBR286W	-0.707075	No	Yes	No	1.93534	ENO1
0.0538488	764.907	7	1048694	1048712	41.1893	YGR279C	-1.26882	No	Yes	No	1.61478	ENO1
2.51376	7.5257	2	19162	19179	18.9178	YBL104C	0.400324	No	Yes	No	1.27687	ENO1
0.0705624	1726.81	8	451964	451989	121.848	YHR174W	-1.15143	No	Yes	No	2.08582	ENO1
0.0183863	36.859	8	467032	467056	0.6777	YHR180W-A	-1.73551	No	Yes	No	-0.168963	ENO1
0.283282	354.848	10	121764	121785	100.522	YJL159W	-0.547781	No	Yes	No	2.00226	ENO1
0.259777	354.848	10	121912	121936	92.1814	YJL159W	-0.585399	No	Yes	No	1.96464	ENO1
1.5811	141.676	10	383439	383467	224.004	YJL034W	0.198959	No	Yes	No	2.35026	ENO1
0.0184219	7628.23	10	663838	663860	140.526	snR3	-1.73467	No	Yes	No	2.14776	ENO1
0.0660337	2993.68	10	74856	74879	197.684	YJL190C	-1.18023	Yes	Yes	No	2.29597	ENO1	FBA1
0.0296339	3005.7	10	139591	139618	89.0706	snR128	-1.52821	No	Yes	No	1.94973	ENO1
0.00434857	3005.7	10	139635	139656	13.0705	snR128	-2.36165	No	Yes	No	1.11629	ENO1
0.179139	1333.01	10	139907	139930	238.794	snR190	-0.746811	No	Yes	No	2.37802	ENO1
0.111995	1556.88	10	228214	228233	174.362	snR37	-0.950802	No	Yes	No	2.24145	ENO1
0.359343	1556.88	10	228286	228313	559.453	snR37	-0.444491	No	Yes	No	2.74776	ENO1
0.208644	1556.88	10	228421	228448	324.834	snR37	-0.680593	No	Yes	No	2.51166	ENO1
0.493784	77.1463	10	433549	433569	38.0936	YJL002C	-0.306463	No	Yes	No	1.58085	ENO1
0.073169	520.625	10	453801	453821	38.0936	YJR009C	-1.13567	No	Yes	No	1.58085	ENO1
0.085256	2066.99	1	143002	143022	176.224	YAL003W	-1.06928	No	No	Yes	2.24606	PFK2
4.84632	29.7494	2	421936	421956	144.175	YBR086C	0.685412	No	No	Yes	2.15889	PFK2
0.232406	22.9232	11	553286	553306	5.3275	YKR058W	-0.633753	No	No	Yes	0.726523	PFK2
11.1835	11.8794	11	564918	564934	132.854	YKR064W	1.04858	No	No	Yes	2.12337	PFK2
6.73224	29.7494	2	422342	422361	200.28	YBR086C	0.82816	No	No	Yes	2.30164	PFK2
2.64866	31.9152	11	38117	38136	84.5323	YKL211C	0.423026	No	No	Yes	1.92702	PFK2
2.61969	4.86165	11	57033	57051	12.736	YKL203C	0.418249	No	No	Yes	1.10503	PFK2
0.584126	44.1059	11	70065	70080	25.7634	YKL198C	-0.233494	No	No	Yes	1.411	PFK2
1.50858	116.207	11	141596	141617	175.307	YKL164C	0.178569	No	No	Yes	2.2438	PFK2
0.0806708	68.1039	11	195638	195657	5.494	YKL130C	-1.09328	No	No	Yes	0.739889	PFK2
0.574796	320.341	11	417657	417681	184.131	YKL013C	-0.240487	No	No	Yes	2.26513	PFK2
0.254485	274.11	12	90444	90461	69.7568	YLL026W	-0.594338	No	No	Yes	1.84359	PFK2
0.200828	618.53	12	243454	243475	124.218	YLR048W	-0.697177	No	No	Yes	2.09418	PFK2
0.522555	116.367	12	254976	255000	60.8083	YLR056W	-0.281868	No	No	Yes	1.78396	PFK2
7.91435	5.71645	12	255324	255339	45.242	YLR057W	0.898415	No	No	Yes	1.65554	PFK2
1.28776	60.1162	12	262821	262844	77.4151	YLR060W	0.109834	No	No	Yes	1.88883	PFK2
0.0103091	2632.33	12	263412	263428	27.1369	YLR061W	-1.98678	No	No	Yes	1.43356	PFK2
1.23321	21.0601	12	502578	502593	25.9715	YLR173W	0.0910376	No	No	Yes	1.4145	PFK2
0.561487	115.267	12	547234	547250	64.7207	YLR197W	-0.25066	No	No	Yes	1.81104	PFK2
3.95643	9.36265	12	620196	620224	37.0427	YLR240W	0.597304	No	No	Yes	1.5687	PFK2
12.8962	9.36265	12	620226	620247	120.743	YLR240W	1.11046	No	No	Yes	2.08186	PFK2
0.37647	339.185	12	638835	638857	127.693	YLR249W	-0.42427	No	No	Yes	2.10617	PFK2
3.12297	8.3029	12	693953	693985	25.9297	YLR274W	0.494568	No	No	Yes	1.4138	PFK2
2.31569	58.6118	12	724281	724304	135.726	YLR297W	0.36468	No	No	Yes	2.13266	PFK2
0.428398	162.929	12	730230	730255	69.7984	YLR300W	-0.368153	No	No	Yes	1.84385	PFK2
3.8915	58.9207	12	784796	784815	229.29	YLR328W	0.590117	No	No	Yes	2.36039	PFK2
0.0610726	2066.99	1	143313	143331	126.237	YAL003W	-1.21415	No	No	Yes	2.10119	PFK2
0.521001	60.0745	12	812133	812151	31.2989	YLR342W	-0.283161	No	No	Yes	1.49553	PFK2
2.3355	60.0745	12	813853	813872	140.304	YLR342W	0.36838	No	No	Yes	2.14707	PFK2
1.05101	60.0745	12	814171	814193	63.139	YLR342W	0.0216075	No	No	Yes	1.8003	PFK2
0.225446	252.555	2	489210	489227	56.9375	YBR126C	-0.646958	No	No	Yes	1.7554	PFK2
0.0447443	1493.9	12	898823	898840	66.8433	YLR388W	-1.34926	No	No	Yes	1.82506	PFK2
19.8691	11.6972	12	908674	908696	232.412	YLR394W	1.29818	No	No	Yes	2.36626	PFK2
4.06418	23.8614	12	925047	925065	96.977	YLR402W	0.608973	No	No	Yes	1.98667	PFK2
0.951832	16.3977	12	990492	990517	15.6079	YLR427W	-0.0214398	No	No	Yes	1.19334	PFK2
13.9403	12.7727	2	499616	499635	178.055	YBR132C	1.14427	No	No	Yes	2.25055	PFK2
2.0982	52.3684	12	1006736	1006757	109.879	YLR435W	0.321847	No	No	Yes	2.04092	PFK2
0.0763385	707.145	12	39735	39754	53.9824	YLL050C	-1.11726	No	No	Yes	1.73225	PFK2
7.45141	9.2666	12	57000	57023	69.0492	YLL040C	0.872238	No	No	Yes	1.83916	PFK2
2.30486	28.1523	12	179166	179188	64.8872	YLR018C	0.362644	No	No	Yes	1.81216	PFK2
0.035224	3192.71	12	202592	202609	112.46	YLR029C	-1.45316	No	No	Yes	2.051	PFK2
0.382946	101.622	12	560761	560792	38.9156	YLR209C	-0.416862	No	No	Yes	1.59012	PFK2
4.44367	36.8655	12	605723	605742	163.818	YLR231C	0.647742	No	No	Yes	2.21436	PFK2
13.3625	17.8544	12	696202	696222	238.579	YLR276C	1.12589	No	No	Yes	2.37763	PFK2
0.374626	335.966	2	564627	564645	125.862	YBR162C	-0.426402	No	No	Yes	2.09989	PFK2
0.953698	163.932	12	708277	708295	156.342	YLR285C-A	-0.0205889	No	No	Yes	2.19407	PFK2
0.187633	1777.17	12	712404	712423	333.455	YLR287C-A	-0.726691	No	No	Yes	2.52304	PFK2
0.407865	286.138	12	965567	965584	116.706	YLR421C	-0.389483	No	No	Yes	2.06709	PFK2
0.0699449	1347.04	12	1017972	1017993	94.2187	YLR441C	-1.15524	No	No	Yes	1.97414	PFK2
1.96115	29.245	2	581438	581454	57.3538	YBR172C	0.292511	No	No	Yes	1.75856	PFK2
28.3833	6.44185	13	49242	49260	182.841	YML111W	1.45306	No	No	Yes	2.26207	PFK2
0.784489	89.6626	13	179000	179025	70.3394	YML048W	-0.105413	No	No	Yes	1.8472	PFK2
0.582724	145.992	13	229668	229685	85.0733	YML022W	-0.234537	No	No	Yes	1.92979	PFK2
11.3403	12.7905	13	237654	237672	145.049	YML017W	1.05463	No	No	Yes	2.16151	PFK2
7.57702	16.1385	13	250986	251005	122.282	YML010W	0.879498	No	No	Yes	2.08736	PFK2
14.1878	10.3907	13	251036	251056	147.421	YML009W-B	1.15192	No	No	Yes	2.16856	PFK2
0.59872	58.4633	13	289768	289791	35.0032	YMR011W	-0.222776	No	No	Yes	1.54411	PFK2
6.60182	21.473	13	291574	291594	141.761	YMR012W	0.819664	No	No	Yes	2.15156	PFK2
0.237842	25.0241	13	338512	338530	5.9518	YMR033W	-0.623711	No	No	Yes	0.774648	PFK2
1.17505	90.7835	13	353581	353606	106.675	YMR043W	0.0700557	No	No	Yes	2.02806	PFK2
0.626952	268.068	2	612124	612145	168.066	YBR196C	-0.202765	No	No	Yes	2.22548	PFK2
37.8166	5.4887	13	403656	403674	207.564	YMR066W	1.57768	No	No	Yes	2.31715	PFK2
0.196749	161.62	13	435622	435638	31.7985	YMR083W	-0.706088	No	No	Yes	1.50241	PFK2
3.389	15.1059	13	466044	466072	51.1938	YMR100W	0.530072	No	No	Yes	1.70922	PFK2
3.20165	15.1059	13	467287	467303	48.3636	YMR100W	0.505373	No	No	Yes	1.68452	PFK2
6.81166	13.076	13	487887	487905	89.0689	YMR109W	0.833253	No	No	Yes	1.94973	PFK2
2.7281	16.9957	13	541862	541884	46.3658	YMR136W	0.43586	No	No	Yes	1.6662	PFK2
4.64658	17.2876	13	560440	560470	80.3284	YMR147W	0.667133	No	No	Yes	1.90487	PFK2
34.5971	6.94865	13	618159	618178	240.403	YMR177W	1.53904	No	No	Yes	2.38094	PFK2
0.0438289	358.008	13	633585	633599	15.6911	YMR186W	-1.35824	No	No	Yes	1.19565	PFK2
2.99296	13.058	13	639989	640004	39.0821	YMR189W	0.476101	No	No	Yes	1.59198	PFK2
0.0219687	693.41	13	651721	651740	15.2333	YMR194W	-1.6582	No	No	Yes	1.18279	PFK2
2.92287	47.9879	13	664716	664735	140.262	YMR200W	0.46581	No	No	Yes	2.14694	PFK2
0.152281	523.948	13	667840	667869	79.7874	YMR202W	-0.817354	No	No	Yes	1.90193	PFK2
8.45251	21.4937	13	697913	697932	181.676	YMR215W	0.926986	No	No	Yes	2.2593	PFK2
1.62068	137.958	2	665030	665049	223.586	YBR221C	0.209698	No	No	Yes	2.34944	PFK2
6.64333	29.1453	13	747514	747534	193.621	YMR238W	0.822386	No	No	Yes	2.28695	PFK2
15.7708	13.7207	13	798864	798882	216.387	YMR266W	1.19786	No	No	Yes	2.33523	PFK2
1.66651	44.0309	13	12558	12583	73.3778	YML130C	0.221807	No	No	Yes	1.86556	PFK2
2.02303	37.5057	13	41656	41676	75.8751	YML115C	0.306001	No	No	Yes	1.8801	PFK2
0.354202	15.0409	13	239412	239431	5.3275	YML016C	-0.450749	No	No	Yes	0.726523	PFK2
4.54924	40.3197	13	627414	627435	183.424	YMR183C	0.657939	No	No	Yes	2.26346	PFK2
0.111062	811.341	13	753183	753200	90.1095	YMR242C	-0.954433	No	No	Yes	1.95477	PFK2
0.719075	156.801	13	879036	879054	112.751	YMR304C-A	-0.143226	No	No	Yes	2.05212	PFK2
5.4077	5.53385	14	153446	153470	29.9254	YNL262W	0.733013	No	No	Yes	1.47604	PFK2
1.8986	69.427	14	201976	201997	131.814	YNL239W	0.278433	No	No	Yes	2.11996	PFK2
3.98245	54.2205	14	211550	211568	215.93	YNL234W	0.60015	No	No	Yes	2.33431	PFK2
3.51241	15.2032	14	278881	278909	53.3998	YNL192W	0.545605	No	No	Yes	1.72754	PFK2
0.413107	228	14	282224	282247	94.1882	YNL190W	-0.383938	No	No	Yes	1.974	PFK2
0.799378	228	14	283335	283354	182.258	YNL190W	-0.0972477	No	No	Yes	2.26069	PFK2
4.41153	17.6804	14	395185	395210	77.9977	YNL123W	0.64459	No	No	Yes	1.89208	PFK2
0.258599	36.8571	14	481298	481318	9.5312	YNL077W	-0.587374	No	No	Yes	0.979148	PFK2
5.35784	27.0334	14	529617	529633	144.841	YNL053W	0.72899	No	No	Yes	2.16089	PFK2
2.02503	52.4314	14	574469	574492	106.175	YNL032W	0.306432	No	No	Yes	2.02602	PFK2
0.635465	9.5626	14	710933	710951	6.0767	YNR047W	-0.196908	No	No	Yes	0.783668	PFK2
6.44111	20.8198	14	711383	711405	134.103	YNR048W	0.808961	No	No	Yes	2.12744	PFK2
1.0218	428.145	1	58354	58371	437.479	YAL044C	0.00936573	No	No	Yes	2.64096	PFK2
0.663103	92.3423	2	726844	726874	61.2325	YBR255C-A	-0.178419	No	No	Yes	1.78698	PFK2
9.14132	17.5248	14	158446	158470	160.199	YNL258C	0.961009	No	No	Yes	2.20466	PFK2
0.00657949	3934.68	14	230452	230484	25.8882	snR19	-2.18181	No	No	Yes	1.4131	PFK2
3.64721	33.4479	14	264878	264896	121.991	YNL199C	0.561961	No	No	Yes	2.08633	PFK2
24.8316	6.69445	14	267044	267062	166.234	YNL197C	1.395	No	No	Yes	2.22072	PFK2
0.263842	133.93	14	380483	380498	35.3362	YNL130C	-0.578657	No	No	Yes	1.54822	PFK2
4.71649	17.5433	14	390078	390097	82.7425	YNL125C	0.673619	No	No	Yes	1.91773	PFK2
8.455	13.0844	14	405166	405184	110.628	YNL118C	0.927114	No	No	Yes	2.04387	PFK2
0.184409	928.75	14	494945	494963	171.27	YNL069C	-0.734217	No	No	Yes	2.23368	PFK2
2.1649	136.125	14	506096	506119	294.697	YNL064C	0.335437	No	No	Yes	2.46938	PFK2
9.41673	15.4431	14	590831	590859	145.424	YNL023C	0.9739	No	No	Yes	2.16264	PFK2
0.578023	138.107	14	630289	630317	79.8291	YNR001C	-0.238055	No	No	Yes	1.90216	PFK2
1.80671	76.8282	14	661752	661771	138.806	YNR016C	0.256888	No	No	Yes	2.14241	PFK2
0.597339	8.7098	14	682097	682118	5.2027	YNR031C	-0.223779	No	No	Yes	0.716229	PFK2
11.8795	13.1875	14	698464	698484	156.661	YNR039C	1.0748	No	No	Yes	2.19496	PFK2
2.41552	2.4812	14	754311	754330	5.9934	YNR066C	0.383011	No	No	Yes	0.777673	PFK2
7.34352	24.836	14	759064	759083	182.383	YNR067C	0.865905	No	No	Yes	2.26099	PFK2
0.0879535	541.359	15	185680	185710	47.6144	YOL077W-A	-1.05575	No	No	Yes	1.67774	PFK2
0.174343	143.716	15	220532	220546	25.0558	YOL058W	-0.758596	No	No	Yes	1.39891	PFK2
23.9939	7.3844	15	244860	244882	177.181	YOL045W	1.3801	No	No	Yes	2.24842	PFK2
34.8354	5.90585	15	260949	260967	205.733	YOL034W	1.54202	No	No	Yes	2.3133	PFK2
2.72182	49.4837	15	305324	305345	134.686	YOL011W	0.434859	No	No	Yes	2.12932	PFK2
7.07128	18.1521	15	329049	329071	128.359	YOR001W	0.849498	No	No	Yes	2.10843	PFK2
0.0153558	3640.13	15	445782	445804	55.897	YOR063W	-1.81373	No	No	Yes	1.74739	PFK2
4.39906	8.81795	15	465732	465756	38.7907	YOR073W	0.64336	No	No	Yes	1.58873	PFK2
1.27857	32.0643	15	524677	524705	40.9966	YOR108W	0.106725	No	No	Yes	1.61275	PFK2
1.59693	23.978	15	961500	961523	38.2913	YOR341W	0.203286	No	No	Yes	1.5831	PFK2
4.67621	23.978	15	966225	966246	112.126	YOR341W	0.669894	No	No	Yes	2.04971	PFK2
4.93916	10.6683	15	1038657	1038673	52.6922	YOR373W	0.693653	No	No	Yes	1.72175	PFK2
0.00401126	1535.65	15	93922	93941	6.1599	YOL120C	-2.39672	No	No	Yes	0.789574	PFK2
0.499733	2729.85	15	159508	159525	1364.2	YOL086C	-0.301262	No	No	Yes	3.13488	PFK2
1.52491	78.2242	15	186377	186396	119.285	YOL077C	0.183245	No	No	Yes	2.07659	PFK2
26.0655	4.4742	15	189974	189996	116.622	YOL075C	1.41607	No	No	Yes	2.06678	PFK2
4.99709	21.4639	15	312402	312418	107.257	YOL007C	0.698717	No	No	Yes	2.03043	PFK2
3.29334	34.9059	15	322076	322100	114.957	YOL003C	0.517636	No	No	Yes	2.06054	PFK2
7.11561	10.8971	15	397575	397591	77.5399	YOR034C-A	0.852212	No	No	Yes	1.88953	PFK2
1.52461	49.0299	3	128794	128814	74.7513	YCR008W	0.183158	No	No	Yes	1.87362	PFK2
3.7778	23.9516	15	582174	582190	90.4841	YOR137C	0.577239	No	No	Yes	1.95657	PFK2
2.70198	26.5255	15	585384	585400	71.6714	YOR138C	0.431682	No	No	Yes	1.85535	PFK2
0.701625	60.6853	15	638639	638670	42.5783	YOR161C	-0.153895	No	No	Yes	1.62919	PFK2
0.0167326	1696.42	3	138844	138873	28.3855	YCR012W	-1.77644	No	No	Yes	1.4531	PFK2
0.15528	706.279	15	877078	877093	109.671	YOR298C-A	-0.808885	No	No	Yes	2.04009	PFK2
4.8268	25.6013	15	948802	948824	123.572	YOR335C	0.683659	No	No	Yes	2.09192	PFK2
0.00699238	1696.42	3	139020	139056	11.862	YCR012W	-2.15537	No	No	Yes	1.07416	PFK2
0.00334934	21125.3	15	1028333	1028350	70.7557	YOR369C	-2.47504	No	No	Yes	1.84976	PFK2
0.00223617	21125.3	15	1028668	1028683	47.2398	YOR369C	-2.65049	No	No	Yes	1.67431	PFK2
0.708863	167.69	16	23346	23366	118.869	YPL274W	-0.149438	No	No	Yes	2.07507	PFK2
4.91795	51.8448	16	104145	104162	254.97	YPL235W	0.691784	No	No	Yes	2.40649	PFK2
0.87952	123.322	16	110416	110438	108.464	YPL231W	-0.0557544	No	No	Yes	2.03529	PFK2
1.57928	40.823	16	124215	124232	64.4709	YPL226W	0.198459	No	No	Yes	1.80936	PFK2
1.87495	40.823	16	124794	124811	76.541	YPL226W	0.272989	No	No	Yes	1.88389	PFK2
0.39433	407.206	16	139218	139238	160.573	YPL218W	-0.40414	No	No	Yes	2.20567	PFK2
1.77382	23.464	16	208572	208593	41.621	YPL179W	0.24891	No	No	Yes	1.61931	PFK2
5.33213	23.464	16	209534	209553	125.113	YPL179W	0.726901	No	No	Yes	2.0973	PFK2
0.578774	190.137	16	298347	298373	110.046	YPL135W	-0.237491	No	No	Yes	2.04158	PFK2
0.0862175	2543.58	16	304056	304075	219.301	YPL131W	-1.0644	No	No	Yes	2.34104	PFK2
0.0272282	2543.58	16	304089	304113	69.2572	YPL131W	-1.56498	No	No	Yes	1.84046	PFK2
0.245101	150.113	16	498645	498676	36.793	YPL028W	-0.610654	No	No	Yes	1.56577	PFK2
0.700691	181.289	16	535092	535111	127.027	YPL010W	-0.154473	No	No	Yes	2.1039	PFK2
6.15289	29.5607	16	610428	610450	181.884	YPR024W	0.789079	No	No	Yes	2.25979	PFK2
6.71771	15.1795	16	714260	714287	101.972	YPR089W	0.827221	No	No	Yes	2.00848	PFK2
0.920318	62.3195	16	786768	786795	57.3537	YPR124W	-0.0360622	No	No	Yes	1.75856	PFK2
3.14164	44.6992	16	896936	896959	140.429	YPR180W	0.497157	No	No	Yes	2.14746	PFK2
17.6464	7.62775	16	917008	917030	134.602	YPR189W	1.24666	No	No	Yes	2.12905	PFK2
0.812111	106.652	16	919538	919564	86.6133	YPR191W	-0.0903846	No	No	Yes	1.93758	PFK2
0.371325	409.457	16	105445	105463	152.041	YPL234C	-0.430246	No	No	Yes	2.18196	PFK2
0.211503	32.2728	16	128104	128123	6.8258	YPL224C	-0.674684	No	No	Yes	0.834154	PFK2
1.89163	47.68	16	256240	256257	90.1927	YPL156C	0.276835	No	No	Yes	1.95517	PFK2
0.398149	48.8184	16	278694	278729	19.437	YPL145C	-0.399955	No	No	Yes	1.28863	PFK2
0.708872	98.2292	16	328790	328813	69.632	YPL117C	-0.149432	No	No	Yes	1.84281	PFK2
13.5449	8.24435	16	602078	602095	111.669	YPR021C	1.13178	No	No	Yes	2.04793	PFK2
8.57993	11.7151	1	89336	89353	100.515	YAL029C	0.933484	No	No	Yes	2.00223	PFK2
2.89377	34.0301	16	675584	675605	98.4752	YPR060C	0.461464	No	No	Yes	1.99333	PFK2
7922.29	0.0204	mt	7583	7602	161.615	NULL	3.89885	No	No	Yes	2.20848	PFK2	*
2360.56	0.0204	mt	8006	8022	48.1555	NULL	3.37302	No	No	Yes	1.68265	PFK2	*
6928.69	0.0204	mt	17200	17219	141.345	NULL	3.84065	No	No	Yes	2.15028	PFK2	*
4378.36	0.0204	mt	18391	18417	89.3186	NULL	3.64131	No	No	Yes	1.95094	PFK2	*
6273.77	0.0204	mt	19853	19870	127.985	NULL	3.79753	No	No	Yes	2.10716	PFK2	*
2315.68	0.0204	mt	58735	58766	47.2398	NULL	3.36468	No	No	Yes	1.67431	PFK2	*
5339.31	0.0204	mt	58795	58811	108.922	NULL	3.72749	No	No	Yes	2.03712	PFK2	*
2132.05	0.0204	mt	59246	59276	43.4939	NULL	3.3288	No	No	Yes	1.63843	PFK2	*
4451.81	0.0204	mt	59368	59387	90.817	NULL	3.64854	No	No	Yes	1.95817	PFK2	*
332.559	0.0204	mt	59758	59785	6.7842	NULL	2.52187	No	No	Yes	0.831499	PFK2	*
758.971	0.0204	mt	62410	62443	15.483	NULL	2.88022	No	No	Yes	1.18986	PFK2	*
973.196	0.0204	mt	78128	78161	19.8532	NULL	2.9882	No	No	Yes	1.29783	PFK2	*
2.47864	39.8807	3	175780	175803	98.8499	YCR030C	0.394214	No	No	Yes	1.99498	PFK2
0.0748529	1689.79	3	177426	177442	126.486	YCR031C	-1.12579	No	No	Yes	2.10204	PFK2
12.3043	9.7859	4	92166	92188	120.409	YDL206W	1.09006	No	No	Yes	2.08066	PFK2
0.363794	94.0435	4	128226	128241	34.2125	YDL185W	-0.439144	No	No	Yes	1.53418	PFK2
5.42586	5.3696	4	176422	176453	29.1347	YDL156W	0.734469	No	No	Yes	1.46441	PFK2
9.89311	13.3616	4	225690	225715	132.188	YDL132W	0.995333	No	No	Yes	2.12119	PFK2
0.164007	555.26	4	241234	241250	91.0668	YDL124W	-0.785136	No	No	Yes	1.95936	PFK2
0.621976	74.4791	4	331311	331327	46.3242	YDL070W	-0.206226	No	No	Yes	1.66581	PFK2
4.61365	16.5811	4	414745	414768	76.4994	YDL021W	0.664045	No	No	Yes	1.88366	PFK2
0.065523	411.617	4	508354	508370	26.9704	YDR033W	-1.18361	No	No	Yes	1.43089	PFK2
0.276773	411.617	4	509408	509429	113.924	YDR033W	-0.557877	No	No	Yes	2.05662	PFK2
0.292552	134.017	4	527126	527141	39.207	YDR037W	-0.533797	No	No	Yes	1.59336	PFK2
0.021082	2003.86	4	580039	580054	42.2453	YDR064W	-1.67609	No	No	Yes	1.62578	PFK2
1.04083	5.9982	4	637205	637225	6.2431	YDR096W	0.0173793	No	No	Yes	0.7954	PFK2
0.281638	112.61	4	652826	652846	31.7152	YDR099W	-0.550308	No	No	Yes	1.50127	PFK2
1.11037	7.64675	4	671721	671742	8.4907	YDR108W	0.0454666	No	No	Yes	0.928943	PFK2
14.1603	7.6509	2	78322	78341	108.339	YBL079W	1.15107	No	No	Yes	2.03478	PFK2
0.444936	222.447	4	807336	807352	98.9747	YDR171W	-0.351703	No	No	Yes	1.99552	PFK2
3.5834	14.7162	4	838758	838786	52.7338	YDR189W	0.554295	No	No	Yes	1.72209	PFK2
1.54127	92.6249	4	856836	856857	142.76	YDR201W	0.187879	No	No	Yes	2.15461	PFK2
0.0681873	81.1822	2	111413	111433	5.5356	YBL058W	-1.1663	No	No	Yes	0.743165	PFK2
1.0015	122.141	4	1109266	1109284	122.324	YDR321W	0.000652512	No	No	Yes	2.08751	PFK2
0.672339	24.8856	4	1110677	1110702	16.7316	YDR322W	-0.172412	No	No	Yes	1.22354	PFK2
6.09484	18.3834	4	1219728	1219749	112.044	YDR371W	0.784962	No	No	Yes	2.04939	PFK2
1.7774	27.9596	4	1367836	1367865	49.6954	YDR456W	0.249784	No	No	Yes	1.69632	PFK2
0.112851	659.069	4	1402248	1402267	74.3768	YDR471W	-0.947493	No	No	Yes	1.87144	PFK2
0.0606901	1965.49	4	1402968	1402998	119.286	snR13	-1.21688	No	No	Yes	2.07659	PFK2
5.26556	18.5986	4	34500	34519	97.9321	YDL234C	0.721445	No	No	Yes	1.99093	PFK2
0.0147673	11085	4	130303	130323	163.695	YDL184C	-1.8307	No	No	Yes	2.21404	PFK2
7.42034	14.6452	4	206033	206053	108.672	YDL140C	0.870424	No	No	Yes	2.03612	PFK2
0.336275	134.539	4	237823	237843	45.242	YDL126C	-0.473305	No	No	Yes	1.65554	PFK2
0.400844	118.889	4	285600	285622	47.656	YDL097C	-0.397024	No	No	Yes	1.67812	PFK2
1.07818	30.3419	4	323977	324004	32.7141	YDL074C	0.0326922	No	No	Yes	1.51473	PFK2
0.323656	1390.25	2	169431	169449	449.964	YBL027W	-0.489916	No	No	Yes	2.65318	PFK2
0.159162	823.467	4	356807	356830	131.065	YDL055C	-0.798161	No	No	Yes	2.11749	PFK2
5.82866	10.1898	4	418733	418750	59.3932	YDL019C	0.765569	No	No	Yes	1.77374	PFK2
3.03989	35.1191	2	172714	172733	106.758	YBL024W	0.482857	No	No	Yes	2.0284	PFK2
2.50668	60.6878	4	484024	484044	152.125	YDR019C	0.399098	No	No	Yes	2.1822	PFK2
180.878	1.45035	4	527327	527347	262.337	YDR038C	2.25739	No	No	Yes	2.41886	PFK2
0.0136075	4875.55	4	556246	556263	66.3439	YDR050C	-1.86622	No	No	Yes	1.8218	PFK2
21.1557	6.55325	4	607849	607868	138.639	YDR081C	1.32543	No	No	Yes	2.14189	PFK2
11.7934	13.3579	4	674592	674613	157.535	YDR109C	1.07164	No	No	Yes	2.19738	PFK2
0.289809	105.557	4	714766	714781	30.5914	YDR129C	-0.537888	No	No	Yes	1.4856	PFK2
0.825143	7.5662	4	738526	738546	6.2432	YDR141C	-0.0834706	No	No	Yes	0.795407	PFK2
4.1558	29.8551	4	810960	810978	124.072	YDR173C	0.618655	No	No	Yes	2.09367	PFK2
4.84939	34.8202	4	846702	846722	168.857	YDR194C	0.685687	No	No	Yes	2.22752	PFK2
0.100845	312.432	4	929917	929948	31.5071	YDR233C	-0.996347	No	No	Yes	1.49841	PFK2
1.60913	49.0151	4	971917	971934	78.8718	YDR258C	0.206592	No	No	Yes	1.89692	PFK2
3.31629	22.39	4	997773	997795	74.2518	YDR264C	0.520652	No	No	Yes	1.87071	PFK2
6.89689	28.5504	4	1044482	1044499	196.909	YDR292C	0.838653	No	No	Yes	2.29426	PFK2
0.0967497	52.0528	4	1167127	1167145	5.0361	YDR346C	-1.01435	No	No	Yes	0.702094	PFK2
2.92498	29.5974	4	1457099	1457117	86.5717	YDR504C	0.466122	No	No	Yes	1.93738	PFK2
11.8756	9.9044	5	72632	72650	117.621	YEL043W	1.07466	No	No	Yes	2.07048	PFK2
0.11835	949.527	5	86322	86340	112.376	YEL034W	-0.926832	No	No	Yes	2.05068	PFK2
0.0659828	1305.73	5	102307	102323	86.1555	YEL026W	-1.18057	No	No	Yes	1.93528	PFK2
0.677775	67.856	5	197190	197222	45.9911	YER021W	-0.168914	No	No	Yes	1.66267	PFK2
0.0981402	67.856	5	198141	198160	6.6594	YER021W	-1.00815	No	No	Yes	0.823435	PFK2
1.60376	8.30465	5	230552	230580	13.3187	YER040W	0.205141	No	No	Yes	1.12446	PFK2
0.88436	201.291	2	344162	344182	178.013	YBR054W	-0.0533707	No	No	Yes	2.25045	PFK2
1.31919	30.6985	5	406614	406632	40.4972	YER123W	0.120309	No	No	Yes	1.60742	PFK2
5.98873	17.4929	5	410410	410431	104.76	YER125W	0.777335	No	No	Yes	2.0202	PFK2
11.6039	17.4929	5	412938	412956	202.985	YER125W	1.0646	No	No	Yes	2.30746	PFK2
2.74019	56.0175	5	440699	440719	153.499	YER136W	0.43778	No	No	Yes	2.1861	PFK2
0.0196136	1167.13	5	442294	442319	22.8916	SCR1	-1.70744	No	No	Yes	1.35968	PFK2
5.61391	30.9013	2	409669	409686	173.477	YBR083W	0.749265	No	No	Yes	2.23924	PFK2
39.8585	3.14415	2	437553	437574	125.321	YBR097W	1.60052	No	No	Yes	2.09802	PFK2
0.280897	67.566	5	39913	39947	18.9791	YEL060C	-0.551452	No	No	Yes	1.27828	PFK2
0.0729531	385.67	5	52164	52193	28.1358	snR80	-1.13696	No	No	Yes	1.44926	PFK2
0.106839	385.67	5	52260	52291	41.2047	snR80	-0.971269	No	No	Yes	1.61495	PFK2
2.80871	45.9521	5	65947	65969	129.066	YEL047C	0.448507	No	No	Yes	2.11081	PFK2
0.578749	121.465	5	223992	224008	70.2979	YER036C	-0.23751	No	No	Yes	1.84694	PFK2
0.0642756	317.94	5	235722	235747	20.4358	YER043C	-1.19195	No	No	Yes	1.31039	PFK2
0.18602	317.94	5	236014	236030	59.1434	YER043C	-0.730439	No	No	Yes	1.77191	PFK2
2.40642	52.9078	5	358115	358135	127.319	YER099C	0.381372	No	No	Yes	2.10489	PFK2
0.273576	142.705	5	395129	395146	39.0405	YER115C	-0.562923	No	No	Yes	1.59152	PFK2
0.0244336	212.928	2	541028	541049	5.2026	YBR149W	-1.61201	No	No	Yes	0.71622	PFK2
0.0299112	3729.2	6	76043	76068	111.545	YFL031W	-1.52417	No	No	Yes	2.04745	PFK2
15.4092	8.10585	6	82967	82984	124.905	YFL026W	1.18778	No	No	Yes	2.09658	PFK2
3.7697	34.2711	6	157270	157291	129.192	YFR006W	0.576306	No	No	Yes	2.11123	PFK2
0.175948	355.539	7	22059	22075	62.5563	YGL255W	-0.754617	No	No	Yes	1.79627	PFK2
1.71714	70.5583	7	117006	117026	121.159	YGL202W	0.234806	No	No	Yes	2.08335	PFK2
0.11651	49.6549	7	131093	131112	5.7853	YGL196W	-0.933636	No	No	Yes	0.762326	PFK2
1.80209	30.2096	7	168937	168963	54.4403	YGL178W	0.255776	No	No	Yes	1.73592	PFK2
9.73389	6.8799	7	231090	231106	66.9682	YGL145W	0.988287	No	No	Yes	1.82587	PFK2
0.0371254	4484.3	7	278390	278408	166.482	YGL123W	-1.43033	No	No	Yes	2.22137	PFK2
0.22975	133.513	7	316792	316812	30.6746	YGL098W	-0.638745	No	No	Yes	1.48678	PFK2
11.8475	16.3955	7	370270	370291	194.245	YGL073W	1.07363	No	No	Yes	2.28835	PFK2
16.5048	8.71515	7	391698	391717	143.842	YGL060W	1.21761	No	No	Yes	2.15789	PFK2
4.40297	26.6574	7	392748	392766	117.371	YGL059W	0.643745	No	No	Yes	2.06956	PFK2
0.772487	177.316	7	399423	399441	136.974	YGL055W	-0.112109	No	No	Yes	2.13664	PFK2
7.86303	23.0362	7	414821	414843	181.134	YGL045W	0.89559	No	No	Yes	2.258	PFK2
14.2027	8.5219	7	429240	429258	121.034	YGL036W	1.15237	No	No	Yes	2.08291	PFK2
1.06786	73.7039	7	473326	473344	78.7053	YGL012W	0.0285135	No	No	Yes	1.896	PFK2
8.90205	12.8668	7	520323	520345	114.541	YGR014W	0.94949	No	No	Yes	2.05896	PFK2
0.187237	156.492	7	523655	523679	29.3012	YGR017W	-0.727608	No	No	Yes	1.46689	PFK2
0.804433	138.766	7	543417	543435	111.628	YGR029W	-0.0945099	No	No	Yes	2.04777	PFK2
8.16532	20.5879	2	608971	608991	168.107	YBR192W	0.911973	No	No	Yes	2.22559	PFK2
10.5447	27.3088	7	577144	577164	287.964	YGR040W	1.02303	No	No	Yes	2.45934	PFK2
0.258079	22.578	7	585880	585899	5.8269	YGR046W	-0.588247	No	No	Yes	0.765438	PFK2
4.83164	22.578	7	586317	586342	109.088	YGR046W	0.684094	No	No	Yes	2.03778	PFK2
0.308478	45.1993	2	634073	634099	13.943	YBR205W	-0.510775	No	No	Yes	1.14436	PFK2
0.232972	1121.58	7	727778	727796	261.296	YGR118W	-0.632697	No	No	Yes	2.41713	PFK2
0.0450238	206.144	7	773725	773745	9.2814	YGR142W	-1.34656	No	No	Yes	0.967613	PFK2
2.61349	20.2413	7	777649	777665	52.9003	YGR143W	0.417221	No	No	Yes	1.72346	PFK2
0.333869	152.837	7	803034	803048	51.0274	YGR157W	-0.476424	No	No	Yes	1.7078	PFK2
2.99557	34.4993	2	635175	635194	103.345	YBR207W	0.476479	No	No	Yes	2.01429	PFK2
3.00499	28.4215	7	826978	827000	85.4063	YGR162W	0.477844	No	No	Yes	1.93149	PFK2
1.21294	56.7897	7	907524	907540	68.8828	YGR204W	0.0838408	No	No	Yes	1.83811	PFK2
1.92169	73.8558	7	916165	916185	141.928	YGR211W	0.283683	No	No	Yes	2.15207	PFK2
0.0999706	713.177	7	921343	921366	71.2967	YGR214W	-1.00013	No	No	Yes	1.85307	PFK2
7.28494	12.9406	7	932598	932615	94.2715	YGR218W	0.862426	No	No	Yes	1.97438	PFK2
3.69619	19.0753	7	988947	988971	70.5059	YGR249W	0.567754	No	No	Yes	1.84823	PFK2
0.479589	19.0753	7	989601	989620	9.1483	YGR249W	-0.319131	No	No	Yes	0.96134	PFK2
0.29127	753.2	7	1002283	1002303	219.385	YGR254W	-0.535704	No	No	Yes	2.34121	PFK2
2.99622	60.274	7	164211	164230	180.594	YGL179C	0.476573	No	No	Yes	2.2567	PFK2
5.6537	19.9945	7	178651	178675	113.043	YGL173C	0.752333	No	No	Yes	2.05324	PFK2
1.13747	15.2218	7	236300	236329	17.3143	YGL142C	0.0559389	No	No	Yes	1.2384	PFK2
0.204653	26.4384	7	426144	426164	5.4107	YGL038C	-0.688983	No	No	Yes	0.733253	PFK2
2.43387	58.9627	7	446615	446636	143.507	YGL026C	0.386297	No	No	Yes	2.15687	PFK2
0.47082	318.156	7	479514	479531	149.794	YGL008C	-0.327145	No	No	Yes	2.1755	PFK2
0.749975	318.156	7	479876	479894	238.609	YGL008C	-0.124953	No	No	Yes	2.37769	PFK2
0.100567	318.156	7	480199	480214	31.9961	YGL008C	-0.997543	No	No	Yes	1.5051	PFK2
1.57062	69.5864	7	490224	490239	109.294	YGL005C	0.196072	No	No	Yes	2.0386	PFK2
0.0521872	1240.16	7	559653	559679	64.7206	YGR037C	-1.28244	No	No	Yes	1.81104	PFK2
23.9401	3.8248	7	700995	701016	91.5662	tK(UUU)G2	1.37913	No	No	Yes	1.96174	PFK2
1.65226	34.4603	7	753824	753840	56.9375	YGR130C	0.218079	No	No	Yes	1.7554	PFK2
1.21112	148.254	7	806343	806364	179.553	YGR159C	0.0831877	No	No	Yes	2.25419	PFK2
0.0607279	82.9306	7	973361	973384	5.0362	YGR240C	-1.21661	No	No	Yes	0.702103	PFK2
0.0709108	498.319	7	1057642	1057669	35.3362	YGR282C	-1.14929	No	No	Yes	1.54822	PFK2
0.235951	498.319	7	1057755	1057778	117.579	YGR282C	-0.627178	No	No	Yes	2.07033	PFK2
0.00521121	17110.8	8	75785	75808	89.1678	YHL015W	-2.28306	No	No	Yes	1.95021	PFK2
0.203824	329.375	8	161076	161100	67.1346	YHR026W	-0.690744	No	No	Yes	1.82695	PFK2
0.103748	489.431	2	88449	88466	50.7776	YBL072C	-0.984019	No	No	Yes	1.70567	PFK2
1.63944	78.447	8	233335	233352	128.609	YHR068W	0.214695	No	No	Yes	2.10927	PFK2
0.559667	10.5602	8	319164	319181	5.9102	YHR102W	-0.25207	No	No	Yes	0.771602	PFK2
0.943935	5.688	8	330706	330726	5.3691	YHR109W	-0.0250581	No	No	Yes	0.729901	PFK2
6.26966	30.9817	8	361770	361792	194.245	YHR127W	0.797244	No	No	Yes	2.28835	PFK2
0.0036372	4942.59	8	381546	381572	17.9772	snR32	-2.43923	No	No	Yes	1.25472	PFK2
0.254623	352.586	8	385591	385608	89.7765	YHR143W	-0.594102	No	No	Yes	1.95316	PFK2
0.435232	352.586	8	386620	386640	153.457	YHR143W	-0.361279	No	No	Yes	2.18599	PFK2
0.195618	1726.81	8	452674	452691	337.796	YHR174W	-0.70859	No	No	Yes	2.52865	PFK2
0.629134	120.867	8	81324	81347	76.0416	YHL011C	-0.201257	No	No	Yes	1.88105	PFK2
0.223155	69.0095	8	121553	121583	15.3998	YHR007C	-0.651394	No	No	Yes	1.18752	PFK2
2.14337	55.3233	8	392562	392583	118.578	YHR147C	0.331096	No	No	Yes	2.074	PFK2
22.2045	5.73015	9	264695	264712	127.235	YIL048W	1.34644	No	No	Yes	2.10461	PFK2
0.382449	62.2494	9	204655	204681	23.8072	YIL083C	-0.417427	No	No	Yes	1.37671	PFK2
0.0312904	548.021	9	231460	231482	17.1478	YIL069C	-1.50459	No	No	Yes	1.23421	PFK2
0.0258294	2088.35	9	256480	256507	53.9408	YIL052C	-1.58789	No	No	Yes	1.73192	PFK2
0.580333	140.498	10	189719	189740	81.5355	YJL122W	-0.236323	No	No	Yes	1.91135	PFK2
2.01559	141.676	10	383262	383281	285.561	YJL034W	0.304403	No	No	Yes	2.4557	PFK2
42.8936	5.04475	10	561678	561698	216.388	YJR066W	1.63239	No	No	Yes	2.33523	PFK2
0.110787	502.79	2	372076	372096	55.7028	YBR067C	-0.95551	No	No	Yes	1.74588	PFK2
0.0156806	2338.43	10	652617	652646	36.668	YJR123W	-1.80464	No	No	Yes	1.56429	PFK2
0.0603074	2066.99	1	142503	142523	124.655	YAL003W	-1.21963	No	No	Yes	2.09571	PFK2
0.307624	16.6417	10	127282	127300	5.1194	YJL156C	-0.51198	No	No	Yes	0.709219	PFK2
5.77508	20.4534	10	165654	165672	118.12	YJL130C	0.761558	No	No	Yes	2.07232	PFK2
5.63876	20.4534	10	168077	168099	115.332	YJL130C	0.751184	No	No	Yes	2.06195	PFK2
3.75544	22.9637	10	288142	288162	86.2387	YJL080C	0.574661	No	No	Yes	1.9357	PFK2
0.797217	189.41	10	315007	315027	151.001	YJL065C	-0.0984235	No	No	Yes	2.17898	PFK2
1.83275	106.917	10	458037	458060	195.952	YJR010C-A	0.263103	No	No	Yes	2.29215	PFK2
0.909046	132.319	10	577114	577132	120.284	YJR077C	-0.0414141	No	No	Yes	2.08021	PFK2
0.361219	15.4399	10	632643	632663	5.5772	YJR109C	-0.44223	No	No	Yes	0.746416	PFK2
1.99861	67.2852	10	643804	643825	134.477	YJR118C	0.300729	No	No	Yes	2.12865	PFK2
0.155478	205.859	10	690361	690378	32.0066	YJR139C	-0.808331	No	No	Yes	1.50524	PFK2
0.248481	205.859	10	690380	690395	51.1522	YJR139C	-0.604706	No	No	Yes	1.70886	PFK2
0.114142	575.769	10	702775	702790	65.7196	YJR145C	-0.942553	No	No	Yes	1.81769	PFK2
0.0152947	380.975	11	26346	26366	5.8269	YKL216W	-1.81546	No	No	Yes	0.765438	PFK2
5.22546	28.3873	11	39385	39407	148.337	YKL210W	0.718125	No	No	Yes	2.17125	PFK2
0.0458466	1179.27	11	159365	159388	54.0657	YKL156W	-1.33869	No	No	Yes	1.73292	PFK2
0.554723	175.796	11	179890	179908	97.518	YKL141W	-0.255924	No	No	Yes	1.98908	PFK2
0.153419	175.796	11	180278	180308	26.9704	YKL141W	-0.814121	No	No	Yes	1.43089	PFK2
0.0059441	12400.7	11	259326	259342	73.7108	YKL096W-A	-2.22591	No	No	Yes	1.86753	PFK2
0.0980191	59.0222	11	291469	291490	5.7853	YKL077W	-1.00869	No	No	Yes	0.762326	PFK2
1.79293	15.3212	11	299933	299961	27.4699	YKL072W	0.253564	No	No	Yes	1.43886	PFK2
5.59017	14.8089	11	324209	324229	82.7842	YKL062W	0.747425	No	No	Yes	1.91795	PFK2
0.887236	144.204	11	426751	426769	127.943	YKL009W	-0.0519611	No	No	Yes	2.10702	PFK2
0.100558	1472.25	11	432759	432776	148.046	YKL006W	-0.997585	No	No	Yes	2.1704	PFK2
0.10788	2481.64	11	520763	520781	267.72	YKR042W	-0.967059	No	No	Yes	2.42768	PFK2
0.162924	468.028	14	349690	349715	76.253	YNL149C	-0.788015	No	No	Yes	1.88226	FBA1
6.87297	17.5433	14	390810	390830	120.574	YNL125C	0.837145	No	No	Yes	2.08125	FBA1
2.57302	24.6341	14	488072	488091	63.3841	YNL074C	0.410444	No	No	Yes	1.80198	FBA1
1.63565	21.6951	14	497403	497421	35.4855	YNL068C	0.213689	No	No	Yes	1.55005	FBA1
9.08848	12.5006	14	535558	535578	113.611	YNL049C	0.958491	No	No	Yes	2.05542	FBA1
0.00404287	190.038	14	618618	618642	0.7683	YNL007C	-2.39331	No	No	Yes	-0.114469	FBA1
4.4913	76.8282	14	656043	656065	345.058	YNR016C	0.652372	No	No	Yes	2.53789	FBA1
0.00999893	76.8282	14	657203	657227	0.7682	YNR016C	-2.00005	No	No	Yes	-0.114526	FBA1
2.42628	76.8282	14	661457	661481	186.407	YNR016C	0.384942	No	No	Yes	2.27046	FBA1
6.82525	8.7098	14	683270	683300	59.4466	YNR031C	0.834119	No	No	Yes	1.77413	FBA1
6.45545	8.7098	14	684825	684850	56.2257	YNR031C	0.809927	No	No	Yes	1.74993	FBA1
3.06428	48.3586	14	701118	701141	148.184	YNR041C	0.486329	No	No	Yes	2.1708	FBA1
0.347654	108.011	14	717445	717461	37.5503	YNR051C	-0.458853	No	No	Yes	1.57461	FBA1
1.25858	108.011	14	717889	717910	135.94	YNR051C	0.0998812	No	No	Yes	2.13335	FBA1
1.40617	50.0954	14	721954	721974	70.4427	YNR053C	0.148039	No	No	Yes	1.84784	FBA1
3.85262	50.0954	14	722055	722076	192.999	YNR053C	0.585757	No	No	Yes	2.28555	FBA1
0.231684	44.5607	14	730033	730058	10.324	YNR055C	-0.635104	No	No	Yes	1.01385	FBA1
0.0160903	2435.19	15	80584	80602	39.1829	YOL127W	-1.79344	No	No	Yes	1.5931	FBA1
2.28573	6.4284	15	149426	149442	14.6936	YOL090W	0.359025	No	No	Yes	1.16713	FBA1
10.6489	7.90465	15	172006	172025	84.176	YOL081W	1.02731	No	No	Yes	1.92519	FBA1
5.74666	7.90465	15	179878	179898	45.4253	YOL081W	0.759415	No	No	Yes	1.6573	FBA1
1.35004	51.1823	15	217276	217295	69.0984	YOL059W	0.130348	No	No	Yes	1.83947	FBA1
0.558466	384.772	15	259523	259547	214.882	snR50	-0.253003	No	No	Yes	2.3322	FBA1
35.3171	5.5337	15	294721	294745	195.434	YOL017W	1.54798	No	No	Yes	2.291	FBA1
1.16085	52.6985	15	330001	330019	61.1753	YOR002W	0.0647779	No	No	Yes	1.78658	FBA1
0.0149722	3640.13	15	445071	445087	54.5007	YOR063W	-1.82471	No	No	Yes	1.7364	FBA1
0.00571186	3640.13	15	445509	445527	20.7919	YOR063W	-2.24322	No	No	Yes	1.31789	FBA1
0.254688	97.2853	15	448505	448542	24.7774	YOR065W	-0.593991	No	No	Yes	1.39406	FBA1
1.60381	6.07785	2	695450	695465	9.7477	YBR238C	0.205152	No	No	Yes	0.988902	FBA1
4.88502	23.4243	15	476903	476919	114.428	YOR080W	0.688867	No	No	Yes	2.05853	FBA1
1.55979	73.176	15	516302	516322	114.139	YOR101W	0.193067	No	No	Yes	2.05744	FBA1
3.56418	32.0643	15	524425	524448	114.283	YOR108W	0.55196	No	No	Yes	2.05798	FBA1
0.720326	32.0643	15	524626	524640	23.0968	YOR108W	-0.142471	No	No	Yes	1.36355	FBA1
0.192801	108.09	15	593553	593590	20.8399	YOR142W	-0.71489	No	No	Yes	1.3189	FBA1
8.60497	17.2207	15	608229	608253	148.184	YOR147W	0.934749	No	No	Yes	2.1708	FBA1
0.581024	27.9336	15	621314	621333	16.2301	YOR153W	-0.235806	No	No	Yes	1.21032	FBA1
0.147379	295.188	2	735696	735714	43.5045	YBR262C	-0.831565	No	No	Yes	1.63853	FBA1
9.08154	27.9336	15	623466	623492	253.68	YOR153W	0.95816	No	No	Yes	2.40429	FBA1
1.68651	18.5353	15	682584	682602	31.2598	YOR186W	0.226988	No	No	Yes	1.49499	FBA1
1.18443	37.4194	15	724899	724929	44.3207	YOR204W	0.0735092	No	No	Yes	1.64661	FBA1
0.0838912	12.018	15	766154	766180	1.0082	YOR227W	-1.07628	No	No	Yes	0.00354669	FBA1
12.5061	12.018	15	766699	766722	150.297	YOR227W	1.09712	No	No	Yes	2.17695	FBA1
0.86552	21.304	15	768488	768505	18.439	YOR229W	-0.0627228	No	No	Yes	1.26574	FBA1
2.23424	29.53	15	833944	833973	65.977	YOR272W	0.349129	No	No	Yes	1.81939	FBA1
1.81816	222.243	15	841310	841329	404.074	YOR276W	0.259632	No	No	Yes	2.60646	FBA1
0.00225797	2445.56	15	842480	842503	5.522	snR5	-2.64628	No	No	Yes	0.742096	FBA1
0.0575195	2445.56	15	842578	842599	140.667	snR5	-1.24018	No	No	Yes	2.14819	FBA1
1.073	77.9569	15	868316	868338	83.6478	YOR294W	0.0306002	No	No	Yes	1.92245	FBA1
0.00739255	77.9569	15	868628	868652	0.5763	YOR294W	-2.13121	No	No	Yes	-0.239351	FBA1
13.9118	9.6921	15	884847	884875	134.835	YOR304W	1.14338	No	No	Yes	2.1298	FBA1
1.89603	78.94	15	910669	910690	149.673	YOR317W	0.277846	No	No	Yes	2.17514	FBA1
0.689191	78.94	15	911098	911117	54.4047	YOR317W	-0.161661	No	No	Yes	1.73564	FBA1
5.39404	19.9674	15	926706	926727	107.705	YOR326W	0.731914	No	No	Yes	2.03224	FBA1
19.9693	6.54535	15	934938	934958	130.706	YOR328W	1.30036	No	No	Yes	2.1163	FBA1
8.8932	6.6413	15	950053	950071	59.0624	YOR336W	0.949058	No	No	Yes	1.77131	FBA1
1.35575	23.978	15	966078	966106	32.5083	YOR341W	0.13218	No	No	Yes	1.51199	FBA1
2.92548	87.0917	15	1026277	1026298	254.785	YOR367W	0.466198	No	No	Yes	2.40617	FBA1
1.89373	105.888	15	1040717	1040739	200.524	YOR374W	0.277318	No	No	Yes	2.30217	FBA1
3.50771	26.6532	15	1046441	1046465	93.4916	YOR377W	0.545023	No	No	Yes	1.97077	FBA1
17.6252	7.49485	15	1062476	1062497	132.098	YOR384W	1.24613	No	No	Yes	2.1209	FBA1
4.92706	13.342	15	1068211	1068239	65.7369	YOR386W	0.692588	No	No	Yes	1.81781	FBA1
2.5653	15.686	15	115609	115639	40.2393	YOL105C	0.409138	No	No	Yes	1.60465	FBA1
0.156679	18.3886	15	135766	135803	2.8811	YOL098C	-0.80499	No	No	Yes	0.459558	FBA1
0.365828	1149.04	15	136162	136183	420.352	snR58	-0.436723	No	No	Yes	2.62361	FBA1
0.619951	65.4494	15	210679	210706	40.5754	YOL062C	-0.207643	No	No	Yes	1.60826	FBA1
0.0581658	37.1489	15	270142	270159	2.1608	YOL029C	-1.23533	No	No	Yes	0.334615	FBA1
9.18136	9.1786	15	397107	397126	84.272	YOR034C	0.962907	No	No	Yes	1.92568	FBA1
0.0059051	7725.08	15	408028	408061	45.6174	snR9	-2.22877	No	No	Yes	1.65913	FBA1
13.4928	4.69405	3	180613	180636	63.3361	YCR032W	1.1301	No	No	Yes	1.80165	FBA1
3.07241	26.5691	15	459754	459777	81.6309	YOR071C	0.487479	No	No	Yes	1.91185	FBA1
3.78078	18.3651	15	484414	484445	69.4344	YOR086C	0.577581	No	No	Yes	1.84157	FBA1
6.75363	18.3651	15	484797	484824	124.031	YOR086C	0.829537	No	No	Yes	2.09353	FBA1
0.00127786	826.693	15	552365	552382	1.0564	YOR122C	-2.89352	No	No	Yes	0.0238284	FBA1
7.79574	11.0318	15	556220	556245	86.0006	YOR124C	0.891857	No	No	Yes	1.9345	FBA1
2.89695	23.9516	15	582732	582757	69.3864	YOR137C	0.461941	No	No	Yes	1.84127	FBA1
1.79772	50.7501	1	81067	81094	91.2347	YAL034C	0.254723	No	No	Yes	1.96016	FBA1
0.51787	22.9025	15	616284	616304	11.8605	YOR151C	-0.285779	No	No	Yes	1.0741	FBA1
9.52624	13.5945	15	640892	640914	129.505	YOR162C	0.978922	No	No	Yes	2.11229	FBA1
7.16751	7.79145	15	741637	741657	55.8453	YOR211C	0.855368	No	No	Yes	1.74699	FBA1
0.0107137	8793.58	15	759326	759354	94.2119	snR35	-1.97006	No	No	Yes	1.97411	FBA1
0.387797	317.236	3	214797	214819	123.023	YCR051W	-0.411395	No	No	Yes	2.08999	FBA1
9.68957	38.8723	15	822552	822570	376.655	YOR267C	0.986304	No	No	Yes	2.57594	FBA1
0.597188	44.9477	15	828512	828529	26.8422	YOR270C	-0.223889	No	No	Yes	1.42882	FBA1
2.07574	44.9477	15	830648	830672	93.2996	YOR270C	0.317173	No	No	Yes	1.96988	FBA1
1.00008	90.3149	15	834858	834885	90.3223	YOR273C	3.58231e-05	No	No	Yes	1.95579	FBA1
0.043066	90.3149	15	836014	836032	3.8895	YOR273C	-1.36587	No	No	Yes	0.589894	FBA1
3.83289	20.8465	15	839721	839741	79.9024	YOR275C	0.583527	No	No	Yes	1.90256	FBA1
12.7937	13.1214	15	859801	859824	167.872	YOR290C	1.107	No	No	Yes	2.22498	FBA1
3.75187	30.4475	15	891544	891564	114.235	YOR306C	0.574248	No	No	Yes	2.0578	FBA1
0.117043	864.006	15	900304	900328	101.126	YOR312C	-0.931654	No	No	Yes	2.00486	FBA1
35.3183	7.0549	15	936740	936761	249.167	YOR329C	1.548	No	No	Yes	2.39649	FBA1
8.80091	11.8615	15	993034	993052	104.392	YOR350C	0.944528	No	No	Yes	2.01867	FBA1
0.641302	54.1355	15	1015827	1015844	34.7172	YOR361C	-0.192937	No	No	Yes	1.54054	FBA1
1.31779	167.69	16	23610	23633	220.98	YPL274W	0.119847	No	No	Yes	2.34435	FBA1
0.687825	278.13	16	25762	25784	191.305	YPL273W	-0.162522	No	No	Yes	2.28173	FBA1
0.616753	69.2923	3	217381	217401	42.7362	YCR053W	-0.209889	No	No	Yes	1.6308	FBA1
0.684025	278.13	16	26123	26151	190.248	YPL273W	-0.164928	No	No	Yes	2.27932	FBA1
0.148382	313.257	16	101143	101160	46.4817	YPL237W	-0.828619	No	No	Yes	1.66728	FBA1
0.868768	51.8448	16	104689	104707	45.0411	YPL235W	-0.0610962	No	No	Yes	1.65361	FBA1
1.1498	123.322	16	109811	109837	141.796	YPL231W	0.0606211	No	No	Yes	2.15166	FBA1
0.345373	123.322	16	110263	110280	42.5922	YPL231W	-0.461712	No	No	Yes	1.62933	FBA1
0.00852725	123.322	16	110798	110817	1.0516	YPL231W	-2.06919	No	No	Yes	0.0218506	FBA1
2.53145	69.2923	3	217449	217476	175.41	YCR053W	0.40337	No	No	Yes	2.24406	FBA1
3.73108	40.823	16	122325	122350	152.314	YPL226W	0.571835	No	No	Yes	2.18274	FBA1
3.26562	52.6116	16	173124	173145	171.809	YPL198W	0.513965	No	No	Yes	2.23505	FBA1
0.0326208	17.6667	16	178674	178705	0.5763	YPL195W	-1.48651	No	No	Yes	-0.239351	FBA1
3.95764	53.0094	16	191664	191684	209.792	YPL188W	0.597437	No	No	Yes	2.32179	FBA1
0.522013	190.137	16	298174	298199	99.2537	YPL135W	-0.282319	No	No	Yes	1.99675	FBA1
3.74328	9.762	16	388730	388746	36.5419	YPL085W	0.573252	No	No	Yes	1.56279	FBA1
9.71481	9.762	16	391180	391204	94.836	YPL085W	0.987434	No	No	Yes	1.97697	FBA1
4.28436	9.762	16	392416	392433	41.8239	YPL085W	0.631886	No	No	Yes	1.62142	FBA1
6.44566	14.9665	16	416830	416855	96.4687	YPL074W	0.809268	No	No	Yes	1.98439	FBA1
2.87862	57.6829	16	427313	427334	166.047	YPL066W	0.459184	No	No	Yes	2.22023	FBA1
9.98804	18.0284	16	456491	456515	180.068	YPL054W	0.99948	No	No	Yes	2.25544	FBA1
9.85035	13.391	16	521950	521976	131.906	YPL016W	0.993452	No	No	Yes	2.12026	FBA1
0.350722	64.075	3	227998	228015	22.4725	tS(CGA)C	-0.455037	No	No	Yes	1.35165	FBA1
5.49391	12.516	16	532521	532540	68.7621	YPL012W	0.739882	No	No	Yes	1.83735	FBA1
21.3611	7.24725	16	598911	598935	154.809	YPR019W	1.32962	No	No	Yes	2.1898	FBA1
0.0676858	172.391	16	644066	644096	11.6684	YPR036W	-1.1695	No	No	Yes	1.06701	FBA1
0.00449675	1804.66	16	646285	646305	8.1151	YPR036W-A	-2.3471	No	No	Yes	0.909294	FBA1
0.328793	19.2778	16	726076	726094	6.3384	YPR097W	-0.483078	No	No	Yes	0.80198	FBA1
4.50359	11.5259	3	233088	233119	51.9077	YCR066W	0.653559	No	No	Yes	1.71523	FBA1
1.53638	186.462	16	732935	732955	286.477	YPR103W	0.186499	No	No	Yes	2.45709	FBA1
0.379098	314.248	16	752761	752781	119.131	YPR113W	-0.421248	No	No	Yes	2.07602	FBA1
0.00962649	314.248	16	752790	752811	3.0251	YPR113W	-2.01653	No	No	Yes	0.48074	FBA1
0.55743	314.248	16	752928	752955	175.171	YPR113W	-0.25381	No	No	Yes	2.24346	FBA1
5.24952	15.7972	16	755188	755208	82.9275	YPR115W	0.72012	No	No	Yes	1.9187	FBA1
0.0993786	1508.02	16	795838	795862	149.865	YPR132W	-1.00271	No	No	Yes	2.1757	FBA1
0.0773839	2447.33	16	821745	821772	189.384	snR45	-1.11135	No	No	Yes	2.27734	FBA1
0.245229	2447.33	16	821776	821801	600.157	snR45	-0.610428	No	No	Yes	2.77826	FBA1
3.01252	5.86575	3	283894	283909	17.6707	YCR093W	0.47893	No	No	Yes	1.24725	FBA1
0.0511708	2447.33	16	821838	821866	125.232	snR45	-1.29098	No	No	Yes	2.09772	FBA1
0.185758	285.642	16	830543	830562	53.0602	YPR149W	-0.731052	No	No	Yes	1.72477	FBA1
3.28599	34.3991	16	857667	857693	113.035	YPR159W	0.516666	No	No	Yes	2.05321	FBA1
0.643527	34.9956	16	862575	862592	22.5206	YPR160W	-0.191433	No	No	Yes	1.35258	FBA1
15.5855	6.2944	16	874278	874308	98.1012	YPR164W	1.19272	No	No	Yes	1.99167	FBA1
2.07895	11.4332	16	908828	908845	23.7691	YPR185W	0.317845	No	No	Yes	1.37601	FBA1
8.2094	15.822	3	47416	47439	129.889	YCL044C	0.914311	No	No	Yes	2.11357	FBA1
3.77507	96.8107	16	74240	74262	365.467	YPL250C	0.576925	No	No	Yes	2.56285	FBA1
3.73019	24.9992	16	196644	196673	93.2515	YPL184C	0.571731	No	No	Yes	1.96966	FBA1
5.45402	33.7281	16	250752	250773	183.954	YPL159C	0.736717	No	No	Yes	2.26471	FBA1
5.00559	48.8184	16	278056	278080	244.365	YPL145C	0.699456	No	No	Yes	2.38804	FBA1
0.776067	48.8184	16	278282	278301	37.8864	YPL145C	-0.110101	No	No	Yes	1.57848	FBA1
5.49641	48.8184	16	279027	279048	268.326	YPL145C	0.740079	No	No	Yes	2.42866	FBA1
5.15904	48.8184	16	279407	279434	251.856	YPL145C	0.712569	No	No	Yes	2.40115	FBA1
0.0949096	16.1901	16	281126	281149	1.5366	snR17b	-1.02269	No	No	Yes	0.186561	FBA1
9.08841	12.7859	16	308089	308111	116.204	YPL128C	0.958488	No	No	Yes	2.06522	FBA1
13.036	6.3467	1	86588	86611	82.7355	YAL031C	1.11514	No	No	Yes	1.91769	FBA1
0.924118	174.174	16	350985	351009	160.957	YPL106C	-0.0342728	No	No	Yes	2.20671	FBA1
0.255802	174.174	16	351113	351133	44.5541	YPL106C	-0.592096	No	No	Yes	1.64889	FBA1
1.18134	35.7695	16	355198	355216	42.2561	YPL105C	0.0723765	No	No	Yes	1.62589	FBA1
1.53711	281.623	16	377234	377257	432.884	YPL090C	0.186704	No	No	Yes	2.63637	FBA1
1.78322	18.0586	16	380019	380037	32.2025	YPL089C	0.251206	No	No	Yes	1.50789	FBA1
11.5986	18.0586	16	380936	380959	209.455	YPL089C	1.06441	No	No	Yes	2.32109	FBA1
9.84424	8.47275	16	403951	403971	83.4078	YPL082C	0.993182	No	No	Yes	1.92121	FBA1
0.821385	161.408	3	120914	120940	132.578	YCR005C	-0.0854533	No	No	Yes	2.12247	FBA1
1.96925	86.2709	16	564811	564830	169.889	YPR004C	0.294301	No	No	Yes	2.23017	FBA1
1.88376	34.0301	16	675537	675555	64.1044	YPR060C	0.275025	No	No	Yes	1.80689	FBA1
0.54174	161.408	3	121492	121510	87.4412	YCR005C	-0.266209	No	No	Yes	1.94172	FBA1
4.55619	31.6701	16	820143	820164	144.295	YPR144C	0.658602	No	No	Yes	2.15925	FBA1
0.728489	45.1517	16	839680	839698	32.8925	YPR156C	-0.137577	No	No	Yes	1.5171	FBA1
2.25033	45.1517	16	839952	839980	101.606	YPR156C	0.352247	No	No	Yes	2.00692	FBA1
2.97158	40.7857	16	897765	897794	121.198	YPR181C	0.472987	No	No	Yes	2.08349	FBA1
5.53338	14.5355	16	918423	918447	80.4305	YPR190C	0.742991	No	No	Yes	1.90542	FBA1
8264.34	0.0204	mt	26639	26662	168.593	NULL	3.91721	No	No	Yes	2.22684	FBA1	*
0.699812	150.338	3	142379	142402	105.208	YCR015C	-0.155019	No	No	Yes	2.02205	FBA1
42.3676	0.0204	mt	58825	58848	0.8643	NULL	1.62703	No	No	Yes	-0.0633355	FBA1	*
16561.6	0.0204	mt	62279	62308	337.856	NULL	4.2191	No	No	Yes	2.52873	FBA1	*
8.85985	20.232	3	146183	146204	179.252	YCR017C	0.947427	No	No	Yes	2.25346	FBA1
0.00653528	249.798	3	162807	162836	1.6325	YCR024C-A	-2.18474	No	No	Yes	0.212853	FBA1
0.000808107	950.865	3	163086	163106	0.7684	YCR024C-B	-3.09253	No	No	Yes	-0.114413	FBA1
0.0430346	2113.55	3	178762	178782	90.9557	snR189	-1.36618	No	No	Yes	1.95883	FBA1
23.3204	6.4593	1	96534	96556	150.633	YAL026C	1.36774	No	No	Yes	2.17792	FBA1
15.6893	10.4947	3	235749	235772	164.654	YCR067C	1.1956	No	No	Yes	2.21657	FBA1
0.746031	224.184	4	118595	118615	167.248	YDL191W	-0.127243	No	No	Yes	2.22336	FBA1
1.12739	94.0435	4	127411	127432	106.024	YDL185W	0.0520752	No	No	Yes	2.0254	FBA1
11.2111	10.7421	4	204711	204734	120.43	YDL141W	1.04965	No	No	Yes	2.08074	FBA1
0.314789	329.796	4	218376	218394	103.816	YDL136W	-0.501981	No	No	Yes	2.01626	FBA1
0.0357155	555.26	4	241049	241080	19.8314	YDL124W	-1.44714	No	No	Yes	1.29735	FBA1
4.26349	46.5369	1	106205	106231	198.409	YAL023C	0.629765	No	No	Yes	2.29756	FBA1
48.8881	3.7039	4	279236	279258	181.077	YDL102W	1.6892	No	No	Yes	2.25786	FBA1
2.3714	57.486	4	288094	288117	136.322	YDL095W	0.375004	No	No	Yes	2.13457	FBA1
10.3425	16.2685	4	290932	290954	168.256	YDL093W	1.01462	No	No	Yes	2.22597	FBA1
0.518776	562.121	4	308592	308616	291.615	YDL082W	-0.28502	No	No	Yes	2.46481	FBA1
0.00333149	562.121	4	309430	309451	1.8727	YDL082W	-2.47736	No	No	Yes	0.272468	FBA1
2.20623	74.4791	4	332866	332892	164.318	YDL070W	0.343651	No	No	Yes	2.21569	FBA1
0.880179	107.692	4	335855	335875	94.788	YDL066W	-0.0554289	No	No	Yes	1.97675	FBA1
3.13544	16.203	4	341865	341882	50.8033	YDL060W	0.496298	No	No	Yes	1.70589	FBA1
1.2124	46.5369	1	107468	107487	56.4214	YAL023C	0.0836469	No	No	Yes	1.75144	FBA1
4.70933	11.8992	4	445300	445316	56.0373	YDL003W	0.672959	No	No	Yes	1.74848	FBA1
0.0204316	427.734	4	453716	453736	8.7393	YDR002W	-1.6897	No	No	Yes	0.941477	FBA1
0.00534016	134.883	4	472680	472704	0.7203	YDR012W	-2.27245	No	No	Yes	-0.142487	FBA1
0.30541	411.617	4	508189	508212	125.712	YDR033W	-0.515116	No	No	Yes	2.09938	FBA1
0.00128323	411.617	4	509088	509108	0.5282	YDR033W	-2.8917	No	No	Yes	-0.277202	FBA1
6.09877	10.7236	1	111435	111461	65.4008	YAL021C	0.785242	No	No	Yes	1.81558	FBA1
1.35373	51.2167	4	578398	578417	69.3336	YDR062W	0.131533	No	No	Yes	1.84094	FBA1
0.123169	2003.86	4	579688	579711	246.814	YDR064W	-0.909497	No	No	Yes	2.39237	FBA1
0.0392857	78.2269	4	594742	594762	3.0732	YDR074W	-1.40577	No	No	Yes	0.487591	FBA1
0.0313055	932.587	4	600883	600915	29.1951	YDR077W	-1.50438	No	No	Yes	1.46531	FBA1
0.0446412	932.587	4	600922	600939	41.6318	YDR077W	-1.35026	No	No	Yes	1.61943	FBA1
0.0322323	932.587	4	601842	601859	30.0594	YDR077W	-1.49171	No	No	Yes	1.47798	FBA1
8.90717	13.6822	4	631903	631922	121.87	YDR093W	0.94974	No	No	Yes	2.0859	FBA1
6.85411	13.6822	4	635205	635224	93.7797	YDR093W	0.835951	No	No	Yes	1.97211	FBA1
1.12665	137.025	1	137720	137746	154.378	YAL007C	0.0517882	No	No	Yes	2.18859	FBA1
0.152112	5.9982	4	639988	640010	0.9124	YDR096W	-0.817836	No	No	Yes	-0.0398147	FBA1
0.770103	112.61	4	654101	654120	86.721	YDR099W	-0.113451	No	No	Yes	1.93812	FBA1
0.00721549	93.1745	4	682219	682243	0.6723	YDR115W	-2.14173	No	No	Yes	-0.172437	FBA1
7.73778	17.6178	4	706459	706486	136.323	YDR127W	0.888616	No	No	Yes	2.13457	FBA1
0.885921	120.165	4	837691	837712	106.457	YDR188W	-0.0526052	No	No	Yes	2.02717	FBA1
0.622418	28.0819	4	896889	896905	17.4787	YDR216W	-0.205918	No	No	Yes	1.24251	FBA1
0.923365	28.0819	4	897769	897788	25.9299	YDR216W	-0.0346264	No	No	Yes	1.4138	FBA1
9.39738	10.3473	4	921194	921215	97.237	YDR227W	0.973007	No	No	Yes	1.98783	FBA1
0.0172007	61.4103	4	927983	928002	1.0563	YDR232W	-1.76445	No	No	Yes	0.0237873	FBA1
0.762377	61.4103	4	928790	928814	46.8178	YDR232W	-0.11783	No	No	Yes	1.67041	FBA1
9.43394	17.4688	4	960778	960798	164.799	YDR251W	0.974693	No	No	Yes	2.21695	FBA1
0.384768	8.23665	4	1005598	1005627	3.1692	YDR270W	-0.414801	No	No	Yes	0.50095	FBA1
5.13841	7.9806	4	1041781	1041798	41.0076	YDR291W	0.710829	No	No	Yes	1.61286	FBA1
0.171603	374.961	4	1184281	1184297	64.3445	YDR353W	-0.765474	No	No	Yes	1.80851	FBA1
0.134508	143.153	2	24826	24851	19.2553	YBL102W	-0.871251	No	No	Yes	1.28455	FBA1
0.0978188	12.2706	4	1291879	1291909	1.2003	YDR409W	-1.00958	No	No	Yes	0.0792898	FBA1
9.32167	4.91945	4	1308745	1308765	45.8575	YDR420W	0.969494	No	No	Yes	1.66141	FBA1
18.6592	7.73835	4	1373317	1373338	144.391	YDR457W	1.27089	No	No	Yes	2.15954	FBA1
14.663	7.73835	4	1374126	1374145	113.467	YDR457W	1.16622	No	No	Yes	2.05487	FBA1
13.9866	7.73835	4	1374162	1374182	108.233	YDR457W	1.14571	No	No	Yes	2.03436	FBA1
0.118268	29.6385	4	1413185	1413203	3.5053	YDR477W	-0.927132	No	No	Yes	0.544725	FBA1
0.203791	116.634	1	34748	34774	23.769	YAL061W	-0.690814	No	No	Yes	1.37601	FBA1
0.0864306	219.45	2	38515	38531	18.9672	YBL099W	-1.06333	No	No	Yes	1.278	FBA1
0.105004	546.475	4	1469376	1469394	57.3818	YDR510W	-0.978796	No	No	Yes	1.75877	FBA1
1.17659	38.8526	4	1498633	1498651	45.7134	YDR531W	0.0706234	No	No	Yes	1.66004	FBA1
7.28359	7.58815	4	28123	28146	55.269	YDL239C	0.862346	No	No	Yes	1.74248	FBA1
5.23077	18.5986	4	35063	35084	97.285	YDL234C	0.718566	No	No	Yes	1.98805	FBA1
3.92483	59.7165	4	61835	61858	234.377	YDL222C	0.593821	No	No	Yes	2.36992	FBA1
10.5263	23.0642	4	119966	119988	242.781	YDL190C	1.02228	No	No	Yes	2.38521	FBA1
0.00447044	11085	4	130377	130393	49.5548	YDL184C	-2.34965	No	No	Yes	1.69509	FBA1
3.01355	27.343	4	171982	172009	82.3994	YDL160C	0.479078	No	No	Yes	1.91592	FBA1
8.27497	27.343	4	172102	172123	226.262	YDL160C	0.917766	No	No	Yes	2.35461	FBA1
2.2974	19.668	4	189053	189071	45.1851	YDL148C	0.361236	No	No	Yes	1.655	FBA1
2.8447	16.3566	4	195935	195967	46.5297	YDL145C	0.454036	No	No	Yes	1.66773	FBA1
1.04008	105.817	4	316230	316257	110.058	YDL078C	0.0170676	No	No	Yes	2.04162	FBA1
27.1506	7.6509	2	76329	76351	207.727	YBL079W	1.43378	No	No	Yes	2.31749	FBA1
0.879912	30.3419	4	324448	324472	26.6982	YDL074C	-0.0555608	No	No	Yes	1.42648	FBA1
0.0333547	823.467	4	356847	356863	27.4665	YDL055C	-1.47684	No	No	Yes	1.4388	FBA1
0.0268228	184.392	4	367314	367337	4.9459	YDL048C	-1.5715	No	No	Yes	0.694245	FBA1
0.290883	184.392	4	367781	367814	53.6364	YDL048C	-0.536281	No	No	Yes	1.72946	FBA1
0.0792488	2070.69	2	88218	88237	164.1	snR56	-1.10101	No	No	Yes	2.21511	FBA1
3.05063	21.0764	4	380284	380302	64.2964	YDL040C	0.48439	No	No	Yes	1.80819	FBA1
5.57202	30.2483	4	403634	403656	168.544	YDL027C	0.746013	No	No	Yes	2.22671	FBA1
1.26204	30.2483	4	404514	404540	38.1745	YDL027C	0.101072	No	No	Yes	1.58177	FBA1
4.24179	36.9042	4	405920	405942	156.54	YDL025C	0.627549	No	No	Yes	2.19462	FBA1
2.62077	34.7206	4	415466	415491	90.9946	YDL020C	0.418429	No	No	Yes	1.95902	FBA1
3.01595	7.7378	4	480270	480297	23.3368	YDR017C	0.479424	No	No	Yes	1.36804	FBA1
0.0278097	2867.47	4	541626	541654	79.7435	snR47	-1.5558	No	No	Yes	1.9017	FBA1
1.50053	114.211	4	549831	549855	171.377	YDR046C	0.176246	No	No	Yes	2.23395	FBA1
3.13751	13.2232	2	108598	108617	41.4878	YBL060W	0.496585	No	No	Yes	1.61792	FBA1
1.28292	58.4999	4	583398	583425	75.0509	YDR067C	0.1082	No	No	Yes	1.87536	FBA1
14.295	6.55325	4	609148	609166	93.6785	YDR081C	1.15518	No	No	Yes	1.97164	FBA1
2.40032	16.6441	4	725783	725800	39.9512	YDR135C	0.38027	No	No	Yes	1.60153	FBA1
16.9069	7.5662	4	737396	737416	127.921	YDR141C	1.22806	No	No	Yes	2.10694	FBA1
6.19451	18.2786	4	745147	745174	113.227	YDR144C	0.792007	No	No	Yes	2.05395	FBA1
0.138294	1271.52	4	768768	768790	175.843	YDR155C	-0.859198	No	No	Yes	2.24512	FBA1
1.33488	22.9142	4	800598	800634	30.5876	YDR170C	0.125441	No	No	Yes	1.48555	FBA1
3.53313	23.7976	4	830651	830671	84.08	YDR184C	0.54816	No	No	Yes	1.92469	FBA1
5.43746	8.41595	4	844308	844326	45.7614	YDR192C	0.735396	No	No	Yes	1.6605	FBA1
0.103257	1148.17	4	914570	914596	118.557	YDR224C	-0.98608	No	No	Yes	2.07393	FBA1
0.462821	312.432	4	929442	929464	144.6	YDR233C	-0.334587	No	No	Yes	2.16017	FBA1
5.05568	14.9781	4	1001042	1001061	75.7247	YDR266C	0.703779	No	No	Yes	1.87924	FBA1
2.53573	49.1026	4	1031065	1031086	124.511	YDR284C	0.404103	No	No	Yes	2.09521	FBA1
18.161	9.51055	2	229607	229636	172.721	YBL004W	1.25914	No	No	Yes	2.23735	FBA1
7.14928	11.7942	4	1045487	1045507	84.32	YDR293C	0.854262	No	No	Yes	1.92593	FBA1
4.95483	11.7942	4	1048665	1048685	58.4382	YDR293C	0.695028	No	No	Yes	1.7667	FBA1
2.59147	11.8588	4	1114340	1114357	30.7317	YDR324C	0.413546	No	No	Yes	1.48759	FBA1
17.7308	8.742	4	1123809	1123834	155.003	YDR326C	1.24873	No	No	Yes	2.19034	FBA1
1.70451	109.418	4	1233221	1233244	186.503	YDR379C-A	0.2316	No	No	Yes	2.27069	FBA1
5.80966	42.4338	4	1344741	1344763	246.526	YDR441C	0.764151	No	No	Yes	2.39186	FBA1
0.000874352	1043.29	4	1444695	1444717	0.9122	YDR497C	-3.05831	No	No	Yes	-0.0399099	FBA1
0.074424	1043.29	4	1445086	1445117	77.6456	YDR497C	-1.12829	No	No	Yes	1.89012	FBA1
7.78223	8.5026	4	1462505	1462523	66.1692	YDR507C	0.891104	No	No	Yes	1.82066	FBA1
2.06768	52.2291	4	1466642	1466664	107.993	YDR508C	0.315483	No	No	Yes	2.0334	FBA1
7.80062	9.51055	2	231679	231708	74.1882	YBL004W	0.892129	No	No	Yes	1.87033	FBA1
4.03051	6.5287	5	29127	29141	26.314	YEL065W	0.60536	No	No	Yes	1.42019	FBA1
23.808	6.5287	5	29262	29286	155.435	YEL065W	1.37672	No	No	Yes	2.19155	FBA1
12.6017	22.5084	5	92781	92799	283.644	YEL031W	1.10043	No	No	Yes	2.45277	FBA1
19.2936	14.8359	5	141686	141710	286.236	YEL007W	1.28541	No	No	Yes	2.45672	FBA1
2.30739	46.4911	5	163949	163973	107.273	YER006W	0.363121	No	No	Yes	2.03049	FBA1
10.7341	9.51055	2	233191	233216	102.087	YBL004W	1.03077	No	No	Yes	2.00897	FBA1
0.214565	147.032	5	251235	251269	31.5479	YER048W-A	-0.668441	No	No	Yes	1.49897	FBA1
6.14245	26.1962	5	324143	324163	160.909	YER081W	0.788341	No	No	Yes	2.20658	FBA1
2.26084	46.0451	5	329237	329256	104.101	YER086W	0.35427	No	No	Yes	2.01745	FBA1
0.692454	46.0451	5	330033	330055	31.8841	YER086W	-0.159609	No	No	Yes	1.50357	FBA1
0.00387389	743.723	2	237032	237063	2.8811	YBL002W	-2.41185	No	No	Yes	0.459558	FBA1
0.167431	1073.76	5	424174	424200	179.78	YER131W	-0.776164	No	No	Yes	2.25474	FBA1
0.0311996	4087.75	5	424833	424852	127.536	snR4	-1.50585	No	No	Yes	2.10563	FBA1
0.000905127	1167.13	5	442122	442144	1.0564	SCR1	-3.04329	No	No	Yes	0.0238284	FBA1
1.67697	1167.13	5	442201	442220	1957.24	SCR1	0.224525	No	No	Yes	3.29164	FBA1
3.06892	88.4973	2	247024	247045	271.591	YBR006W	0.486986	No	No	Yes	2.43392	FBA1
0.253896	777.307	5	510241	510262	197.355	YER165W	-0.595344	No	No	Yes	2.29525	FBA1
7.75889	12.7053	5	515847	515865	98.579	YER166W	0.889799	No	No	Yes	1.99378	FBA1
0.0397383	16.9182	5	525429	525449	0.6723	YER169W	-1.40079	No	No	Yes	-0.172437	FBA1
1.35548	27.3128	5	32056	32073	37.022	YEL063C	0.132094	No	No	Yes	1.56846	FBA1
0.476443	27.3128	5	33124	33139	13.013	YEL063C	-0.321989	No	No	Yes	1.11438	FBA1
24.1862	6.9051	5	37541	37562	167.008	YEL061C	1.38357	No	No	Yes	2.22274	FBA1
65.9069	0.0204	2	260528	260549	1.3445	YBRWTy1-2	1.81893	No	No	Yes	0.128561	FBA1	*
0.126394	208.95	5	67413	67450	26.4101	YEL046C	-0.898272	No	No	Yes	1.42177	FBA1
0.467593	80.1	5	81362	81379	37.4542	YEL037C	-0.330132	No	No	Yes	1.5735	FBA1
4.20423	39.8608	5	83706	83729	167.584	YEL036C	0.623686	No	No	Yes	2.22423	FBA1
4.35481	39.8608	5	84587	84611	173.586	YEL036C	0.638969	No	No	Yes	2.23952	FBA1
2.16378	16.0891	5	170173	170191	34.8133	YER008C	0.335213	No	No	Yes	1.54175	FBA1
1.0524	16.2889	5	191051	191068	17.1425	YER017C	0.0221811	No	No	Yes	1.23407	FBA1
15.3001	7.6295	2	281449	281470	116.732	YBR021W	1.18469	No	No	Yes	2.06719	FBA1
3.28456	33.8584	5	256943	256966	111.21	YER052C	0.516477	No	No	Yes	2.04614	FBA1
0.401332	126.706	5	333961	333980	50.8513	YER088C	-0.396497	No	No	Yes	1.7063	FBA1
0.299668	132.677	5	339680	339709	39.7591	YER091C	-0.52336	No	No	Yes	1.59944	FBA1
1.22364	132.677	5	340197	340219	162.35	YER091C	0.087655	No	No	Yes	2.21045	FBA1
9.4038	13.3478	5	368201	368220	125.52	YER105C	0.973303	No	No	Yes	2.09871	FBA1
1.01521	40.346	5	373701	373718	40.9596	YER107C	0.00655468	No	No	Yes	1.61236	FBA1
4.97122	17.5412	5	381393	381411	87.2012	YER110C	0.696463	No	No	Yes	1.94052	FBA1
3.2238	17.5412	5	381631	381651	56.5494	YER110C	0.508369	No	No	Yes	1.75243	FBA1
26.1016	5.5043	5	391050	391077	143.671	YER114C	1.41667	No	No	Yes	2.15737	FBA1
3.84727	133.249	5	421812	421835	512.644	YER130C	0.585153	No	No	Yes	2.70982	FBA1
0.637338	10.3971	5	470320	470346	6.6265	YER151C	-0.19563	No	No	Yes	0.821284	FBA1
0.0430012	547.171	2	301028	301044	23.529	YBR031W	-1.36652	No	No	Yes	1.3716	FBA1
7.17482	11.9129	5	479495	479514	85.4725	YER155C	0.855811	No	No	Yes	1.93183	FBA1
18.9525	11.9129	5	480072	480094	225.778	YER155C	1.27767	No	No	Yes	2.35368	FBA1
10.0175	28.732	5	539508	539530	287.821	YER175C	1.00076	No	No	Yes	2.45912	FBA1
0.691781	116.405	6	57440	57460	80.5266	YFL037W	-0.160031	No	No	Yes	1.90594	FBA1
0.00703047	3729.2	6	75227	75246	26.218	YFL031W	-2.15302	No	No	Yes	1.4186	FBA1
0.0155932	3729.2	6	75360	75379	58.1501	YFL031W	-1.80706	No	No	Yes	1.76455	FBA1
0.0324998	3729.2	6	76164	76182	121.198	YFL031W	-1.48812	No	No	Yes	2.0835	FBA1
0.130456	551.016	2	308018	308039	71.8833	TLC1	-0.884536	No	No	Yes	1.85663	FBA1
14.2647	8.10585	6	83213	83232	115.628	YFL026W	1.15426	No	No	Yes	2.06306	FBA1
11.2824	13.5682	6	150424	150453	153.082	YFR002W	1.0524	No	No	Yes	2.18492	FBA1
6.18915	23.0737	6	164382	164407	142.806	YFR009W	0.791631	No	No	Yes	2.15475	FBA1
2.08689	32.9496	6	195078	195098	68.7621	YFR021W	0.3195	No	No	Yes	1.83735	FBA1
7.0571	10.6486	6	213629	213649	75.1486	YFR030W	0.848626	No	No	Yes	1.87592	FBA1
1.91053	28.7024	6	239086	239105	54.8369	YFR042W	0.281155	No	No	Yes	1.73907	FBA1
0.072644	501.043	6	53306	53339	36.3978	YFL039C	-1.1388	No	No	Yes	1.56108	FBA1
0.013513	501.043	6	53538	53563	6.7706	YFL039C	-1.86925	No	No	Yes	0.830627	FBA1
0.013513	501.043	6	53678	53695	6.7706	YFL039C	-1.86925	No	No	Yes	0.830627	FBA1
0.0951656	501.043	6	53777	53796	47.6821	YFL039C	-1.02152	No	No	Yes	1.67836	FBA1
1.3101	84.081	6	94355	94375	110.154	YFL022C	0.117303	No	No	Yes	2.042	FBA1
0.25528	84.081	6	94437	94454	21.4642	YFL022C	-0.592983	No	No	Yes	1.33171	FBA1
16.7237	6.09	6	135776	135806	101.847	YFL003C	1.22333	No	No	Yes	2.00795	FBA1
1.13155	54.6572	6	176361	176380	61.8475	YFR015C	0.0536752	No	No	Yes	1.79132	FBA1
0.0571283	32.7806	6	250705	250731	1.8727	YFR051C	-1.24315	No	No	Yes	0.272468	FBA1
0.233781	201.291	2	342965	343000	47.0579	YBR054W	-0.631191	No	No	Yes	1.67263	FBA1
0.599131	175.44	7	25074	25094	105.112	YGL253W	-0.222478	No	No	Yes	2.02165	FBA1
0.628905	86.4306	7	40113	40133	54.3567	YGL245W	-0.201415	No	No	Yes	1.73525	FBA1
1.3958	70.5583	7	116545	116567	98.4853	YGL202W	0.144824	No	No	Yes	1.99337	FBA1
11.263	14.0051	7	136214	136238	157.74	YGL195W	1.05166	No	No	Yes	2.19794	FBA1
0.0466908	185.118	7	145413	145432	8.6433	YGL191W	-1.33077	No	No	Yes	0.93668	FBA1
1.34018	30.3835	7	186133	186154	40.7194	YGL169W	0.127163	No	No	Yes	1.6098	FBA1
0.0299295	41.7146	7	273218	273244	1.2485	YGL125W	-1.5239	No	No	Yes	0.0963885	FBA1
0.0368778	4484.3	7	278441	278465	165.371	YGL123W	-1.43323	No	No	Yes	2.21846	FBA1
1.72978	63.3476	7	292690	292710	109.577	YGL115W	0.23799	No	No	Yes	2.03972	FBA1
0.000691809	3470.46	7	311311	311333	2.4009	YGL103W	-3.16001	No	No	Yes	0.380374	FBA1
0.00610181	3470.46	7	311673	311690	21.1761	YGL103W	-2.21454	No	No	Yes	1.32585	FBA1
1.89573	133.513	7	317031	317054	253.104	YGL098W	0.277775	No	No	Yes	2.4033	FBA1
0.00583666	3891.37	7	346192	346229	22.7126	snR10	-2.23384	No	No	Yes	1.35627	FBA1
15.344	16.3827	7	377767	377787	251.376	YGL066W	1.18594	No	No	Yes	2.40032	FBA1
1.42369	23.0362	7	414852	414886	32.7964	YGL045W	0.153415	No	No	Yes	1.51583	FBA1
4.01718	53.5027	7	417906	417927	214.93	YGL043W	0.603921	No	No	Yes	2.3323	FBA1
6.56078	12.8668	7	519295	519322	84.4162	YGR014W	0.816955	No	No	Yes	1.92643	FBA1
0.24062	331.859	2	393704	393722	79.8518	YBR078W	-0.618668	No	No	Yes	1.90228	FBA1
0.162476	130.63	7	533921	533955	21.2241	YGR026W	-0.789212	No	No	Yes	1.32683	FBA1
0.0385246	1186.6	7	545427	545443	45.7134	snR46	-1.41426	No	No	Yes	1.66004	FBA1
0.0462538	1186.6	7	545472	545489	54.8849	snR46	-1.33485	No	No	Yes	1.73945	FBA1
9.13026	22.578	7	586126	586149	206.143	YGR046W	0.960483	No	No	Yes	2.31417	FBA1
0.279272	115.2	7	593516	593532	32.1722	YGR052W	-0.553972	No	No	Yes	1.50748	FBA1
4.94456	24.6182	7	597314	597343	121.726	YGR054W	0.694127	No	No	Yes	2.08538	FBA1
1.0077	86.3921	7	599987	600006	87.0571	YGR055W	0.00333017	No	No	Yes	1.9398	FBA1
0.0782538	8.59	7	658788	658813	0.6722	YGR089W	-1.10649	No	No	Yes	-0.172501	FBA1
0.190274	331.859	2	393840	393860	63.1441	YBR078W	-0.72062	No	No	Yes	1.80033	FBA1
3.46871	9.42725	7	663602	663619	32.7004	YGR090W	0.540168	No	No	Yes	1.51455	FBA1
4.43089	26.6162	7	671612	671635	117.933	YGR093W	0.646491	No	No	Yes	2.07164	FBA1
22.4291	7.21695	7	680291	680314	161.869	YGR097W	1.35081	No	No	Yes	2.20916	FBA1
3.81913	7.21695	7	681393	681421	27.5625	YGR097W	0.581965	No	No	Yes	1.44032	FBA1
0.110499	9.125	7	690703	690729	1.0083	YGR100W	-0.956643	No	No	Yes	0.00358977	FBA1
0.0123457	206.144	7	773746	773772	2.545	YGR142W	-1.90848	No	No	Yes	0.405688	FBA1
0.158229	177.835	7	799129	799146	28.1387	YGR155W	-0.800713	No	No	Yes	1.4493	FBA1
0.1639	177.835	7	800015	800030	29.1471	YGR155W	-0.785422	No	No	Yes	1.4646	FBA1
0.290617	152.837	7	802685	802705	44.4169	YGR157W	-0.536679	No	No	Yes	1.64755	FBA1
0.604563	56.7897	7	907056	907090	34.333	YGR204W	-0.218558	No	No	Yes	1.53571	FBA1
0.843853	56.7897	7	908567	908588	47.9222	YGR204W	-0.0737332	No	No	Yes	1.68054	FBA1
7.17272	12.9406	7	932373	932391	92.8193	YGR218W	0.855684	No	No	Yes	1.96764	FBA1
3.63155	7.19305	7	29024	29043	26.1219	YGL251C	0.560092	No	No	Yes	1.417	FBA1
0.470876	12.6451	7	102483	102502	5.9543	YGL206C	-0.327093	No	No	Yes	0.774831	FBA1
7.21436	19.9945	7	176960	176988	144.247	YGL173C	0.858198	No	No	Yes	2.15911	FBA1
1.46372	15.2218	7	236244	236260	22.2805	YGL142C	0.165459	No	No	Yes	1.34792	FBA1
2.18988	58.9627	7	447936	447957	129.121	YGL026C	0.34042	No	No	Yes	2.111	FBA1
0.241784	318.156	7	479857	479875	76.9252	YGL008C	-0.616572	No	No	Yes	1.88607	FBA1
0.012376	318.156	7	481567	481587	3.9375	YGL008C	-1.90742	No	No	Yes	0.595221	FBA1
0.21658	318.156	7	481861	481881	68.9062	YGL008C	-0.664382	No	No	Yes	1.83826	FBA1
0.541518	318.156	7	482288	482311	172.287	YGL008C	-0.266387	No	No	Yes	2.23625	FBA1
1.32314	16.9117	7	616021	616046	22.3765	YGR061C	0.121605	No	No	Yes	1.34979	FBA1
6.37274	5.53065	7	632081	632115	35.2454	YGR071C	0.804326	No	No	Yes	1.5471	FBA1
1.54998	26.4568	7	637499	637531	41.0076	YGR077C	0.190326	No	No	Yes	1.61286	FBA1
0.762745	93.9912	7	784521	784542	71.6913	YGR146C	-0.117621	No	No	Yes	1.85547	FBA1
0.237532	12.9381	7	861303	861330	3.0732	YGR184C	-0.624278	No	No	Yes	0.487591	FBA1
0.0135592	77.9102	7	877109	877143	1.0564	YGR189C	-1.86777	No	No	Yes	0.0238284	FBA1
2.43142	77.9102	7	877989	878010	189.432	YGR189C	0.38586	No	No	Yes	2.27745	FBA1
0.0117061	4930.59	7	883092	883112	57.718	YGR192C	-1.93159	No	No	Yes	1.76131	FBA1
1.34397	49.6629	7	903806	903824	66.7454	YGR202C	0.128389	No	No	Yes	1.82442	FBA1
6.67147	7.23355	7	955962	955987	48.2584	YGR233C	0.824221	No	No	Yes	1.68357	FBA1
23.014	5.27045	2	630379	630403	121.294	YBR203W	1.36199	No	No	Yes	2.08384	FBA1
1.92349	82.9306	7	971852	971877	159.516	YGR240C	0.284091	No	No	Yes	2.20281	FBA1
2.9329	87.8141	7	977973	977991	257.55	YGR244C	0.467298	No	No	Yes	2.41086	FBA1
0.798349	41.0804	7	1020941	1020960	32.7965	YGR264C	-0.0978072	No	No	Yes	1.51583	FBA1
0.301759	118.232	7	1025161	1025178	35.6775	YGR267C	-0.520339	No	No	Yes	1.55239	FBA1
0.038545	764.907	7	1048871	1048888	29.4833	YGR279C	-1.41403	No	No	Yes	1.46958	FBA1
0.181299	764.907	7	1049765	1049785	138.677	YGR279C	-0.741604	No	No	Yes	2.142	FBA1
5.60224	34.4993	2	636427	636447	193.274	YBR207W	0.748361	No	No	Yes	2.28617	FBA1
0.314809	498.319	7	1058455	1058478	156.875	YGR282C	-0.501952	No	No	Yes	2.19556	FBA1
13.8589	13.9319	8	22118	22140	193.081	YHL039W	1.14173	No	No	Yes	2.28574	FBA1
11.9761	5.1001	8	41629	41649	61.0793	YHL030W	1.07832	No	No	Yes	1.78589	FBA1
45.9178	5.1001	8	44164	44186	234.185	YHL030W	1.66198	No	No	Yes	2.36956	FBA1
1.84771	32.3291	8	51956	51976	59.7347	YHL027W	0.266633	No	No	Yes	1.77623	FBA1
0.464897	32.3291	8	52041	52059	15.0297	YHL027W	-0.332643	No	No	Yes	1.17695	FBA1
0.00752096	17110.8	8	75736	75759	128.689	YHL015W	-2.12373	No	No	Yes	2.10954	FBA1
0.00170624	17110.8	8	75808	75823	29.1951	YHL015W	-2.76796	No	No	Yes	1.46531	FBA1
8.62865	7.33465	2	649520	649539	63.2881	YBR212W	0.935943	No	No	Yes	1.80132	FBA1
0.111526	329.375	8	161140	161162	36.7339	YHR026W	-0.952623	No	No	Yes	1.56507	FBA1
7.90967	20.3798	8	181279	181301	161.197	YHR036W	0.898158	No	No	Yes	2.20736	FBA1
2.82948	69.3671	8	190879	190897	196.273	YHR042W	0.451707	No	No	Yes	2.29286	FBA1
3.55268	30.6813	8	208045	208069	109.001	YHR050W	0.550556	No	No	Yes	2.03743	FBA1
4.49172	30.6813	8	208689	208716	137.812	YHR050W	0.652413	No	No	Yes	2.13929	FBA1
3.7957	78.447	8	232867	232886	297.761	YHR068W	0.579292	No	No	Yes	2.47387	FBA1
3.75232	6.7184	8	303843	303860	25.2096	YHR099W	0.5743	No	No	Yes	1.40157	FBA1
1.36755	41.1871	2	651825	651846	56.3255	YBR214W	0.135944	No	No	Yes	1.75071	FBA1
14.0792	16.3366	8	338877	338897	230.007	YHR114W	1.14858	No	No	Yes	2.36174	FBA1
0.196369	75.3153	8	356092	356111	14.7896	YHR123W	-0.706926	No	No	Yes	1.16996	FBA1
0.032107	4942.59	8	381682	381705	158.692	snR32	-1.4934	No	No	Yes	2.20055	FBA1
0.0678221	352.586	8	385792	385811	23.9131	YHR143W	-1.16863	No	No	Yes	1.37864	FBA1
0.273195	352.586	8	386165	386183	96.3246	YHR143W	-0.563528	No	No	Yes	1.98374	FBA1
0.951008	352.586	8	386578	386600	335.312	YHR143W	-0.0218157	No	No	Yes	2.52545	FBA1
0.2909	352.586	8	386671	386691	102.567	YHR143W	-0.536257	No	No	Yes	2.01101	FBA1
0.120671	1229.86	8	411295	411315	148.408	snR71	-0.918397	No	No	Yes	2.17146	FBA1
0.0814343	314.877	8	423924	423939	25.6418	YHR163W	-1.08919	No	No	Yes	1.40895	FBA1
5.89107	41.1871	2	652195	652221	242.636	YBR214W	0.770194	No	No	Yes	2.38496	FBA1
0.0352321	1726.81	8	451429	451449	60.8392	YHR174W	-1.45306	No	No	Yes	1.78418	FBA1
3.23711	69.4513	8	467376	467397	224.821	YHR181W	0.510158	No	No	Yes	2.35184	FBA1
62.9738	1.8186	8	526245	526267	114.524	YHR211W	1.79916	No	No	Yes	2.0589	FBA1
0.0115209	120.867	8	81646	81670	1.3925	YHL011C	-1.93851	No	No	Yes	0.143795	FBA1
2.71646	23.4747	2	750981	751011	63.7682	YBR274W	0.434004	No	No	Yes	1.8046	FBA1
0.657376	132.869	8	141839	141864	87.3452	YHR019C	-0.182186	No	No	Yes	1.94124	FBA1
0.360936	36.0534	8	185675	185694	13.013	YHR039C	-0.442569	No	No	Yes	1.11438	FBA1
11.2587	13.0252	8	199179	199203	146.647	YHR047C	1.05149	No	No	Yes	2.16627	FBA1
37.0387	3.665	8	217275	217295	135.747	YHR056C	1.56866	No	No	Yes	2.13273	FBA1
0.531007	136.367	8	225914	225933	72.4116	YHR064C	-0.2749	No	No	Yes	1.85981	FBA1
6.1972	14.412	8	253535	253556	89.314	YHR077C	0.792195	No	No	Yes	1.95092	FBA1
0.338876	107.124	8	288309	288325	36.3018	YHR092C	-0.469959	No	No	Yes	1.55993	FBA1
0.610023	183.686	8	291752	291771	112.053	YHR094C	-0.214654	No	No	Yes	2.04942	FBA1
0.933325	20.7852	8	301805	301824	19.3993	YHR098C	-0.0299671	No	No	Yes	1.28779	FBA1
0.0900656	35.1877	8	368681	368700	3.1692	YHR132C	-1.04544	No	No	Yes	0.50095	FBA1
2.14303	34.3943	8	374252	374275	73.7081	YHR135C	0.331029	No	No	Yes	1.86752	FBA1
2.19845	42.8538	8	483810	483836	94.2118	YHR188C	0.342116	No	No	Yes	1.97411	FBA1
3.62714	14.1918	9	49992	50018	51.4756	YIL156W	0.559564	No	No	Yes	1.7116	FBA1
1.12415	372.735	9	97123	97151	419.011	snR68	0.0508252	No	No	Yes	2.62223	FBA1
6.92251	14.4696	9	122738	122763	100.166	YIL125W	0.840264	No	No	Yes	2.00072	FBA1
1.33937	47.1085	2	81714	81738	63.0959	YBL076C	0.126902	No	No	Yes	1.8	FBA1
3.37166	14.4696	9	124891	124911	48.7865	YIL125W	0.527843	No	No	Yes	1.6883	FBA1
13.2046	14.4696	9	125167	125188	191.065	YIL125W	1.12072	No	No	Yes	2.28118	FBA1
1.58918	17.1625	9	249889	249920	27.2743	YIL056W	0.201173	No	No	Yes	1.43575	FBA1
0.175345	836.613	9	255123	255143	146.696	YIL053W	-0.756106	No	No	Yes	2.16642	FBA1
0.572399	18.0362	9	347533	347554	10.3239	YIL005W	-0.242301	No	No	Yes	1.01384	FBA1
0.779774	47.1085	2	84095	84115	36.734	YBL076C	-0.108031	No	No	Yes	1.56507	FBA1
1.62309	54.8497	9	385354	385377	89.0258	YIR018W	0.210342	No	No	Yes	1.94952	FBA1
14.1827	5.11915	9	402038	402059	72.6036	YIR023W	1.15176	No	No	Yes	1.86096	FBA1
0.373901	377.827	9	423549	423576	141.27	YIR037W	-0.427243	No	No	Yes	2.15005	FBA1
1.84336	63.5346	9	76835	76853	117.117	YIL145C	0.265609	No	No	Yes	2.06862	FBA1
2.34032	6.34	9	110700	110732	14.8376	YIL129C	0.369274	No	No	Yes	1.17136	FBA1
21.7863	7.8663	9	148799	148820	171.377	YIL115C	1.33818	No	No	Yes	2.23395	FBA1
4.59014	27.9078	9	210881	210908	128.101	YIL079C	0.661826	No	No	Yes	2.10755	FBA1
106.019	1.7442	9	239426	239448	184.918	YIL066C	2.02538	No	No	Yes	2.26698	FBA1
9.73859	10.0242	9	281488	281509	97.6211	YIL038C	0.988496	No	No	Yes	1.98954	FBA1
21.3358	10.0242	9	281623	281645	213.873	YIL038C	1.32911	No	No	Yes	2.33016	FBA1
6.64135	7.43265	9	318635	318653	49.3628	YIL017C	0.822256	No	No	Yes	1.6934	FBA1
24.2321	7.4092	9	328512	328533	179.54	YIL013C	1.38439	No	No	Yes	2.25416	FBA1
16.3967	18.9183	9	352554	352575	310.198	YIL002C	1.21476	No	No	Yes	2.49164	FBA1
3.88597	18.9183	9	353372	353393	73.5159	YIL002C	0.589499	No	No	Yes	1.86638	FBA1
0.65544	40.2936	10	81227	81248	26.41	YJL186W	-0.183467	No	No	Yes	1.42177	FBA1
3.84804	40.2936	10	81447	81470	155.051	YJL186W	0.585239	No	No	Yes	2.19047	FBA1
15.413	13.0443	2	93575	93600	201.052	YBL067C	1.18789	No	No	Yes	2.30331	FBA1
0.67159	354.848	10	121938	121959	238.312	YJL159W	-0.172896	No	No	Yes	2.37715	FBA1
1.97836	34.9028	10	144342	144361	69.0502	YJL146W	0.296305	No	No	Yes	1.83916	FBA1
0.456407	289.851	10	151024	151046	132.29	YJL140W	-0.340648	No	No	Yes	2.12153	FBA1
20.4445	8.81945	10	430055	430081	180.309	YJL005W	1.31058	No	No	Yes	2.25602	FBA1
2.83743	37.6538	10	436850	436872	106.84	YJR001W	0.452925	No	No	Yes	2.02873	FBA1
0.937338	34.5791	10	439131	439149	32.4123	YJR002W	-0.0281038	No	No	Yes	1.51071	FBA1
0.0876857	300.094	10	647715	647735	26.314	YJR121W	-1.05707	No	No	Yes	1.42019	FBA1
0.534436	300.094	10	648252	648273	160.381	YJR121W	-0.272104	No	No	Yes	2.20515	FBA1
0.0179982	7628.23	10	663811	663829	137.294	snR3	-1.74477	No	No	Yes	2.13765	FBA1
0.0105315	50.1542	10	696538	696557	0.5282	YJR141W	-1.97751	No	No	Yes	-0.277202	FBA1
0.339189	61.2988	10	701085	701100	20.7919	YJR144W	-0.469558	No	No	Yes	1.31789	FBA1
5.25725	77.9016	10	705166	705187	409.548	YJR147W	0.720759	No	No	Yes	2.61231	FBA1
11.1235	6.00905	10	25404	25426	66.8414	YJL216C	1.04624	No	No	Yes	1.82505	FBA1
4.10333	5.47665	10	48326	48343	22.4725	YJL206C	0.613136	No	No	Yes	1.35165	FBA1
0.0319834	3005.7	10	139566	139587	96.1326	snR128	-1.49508	No	No	Yes	1.98287	FBA1
0.00298984	1333.01	10	139793	139813	3.9855	snR190	-2.52435	No	No	Yes	0.600483	FBA1
7.24262	20.4534	10	171331	171353	148.136	YJL130C	0.859896	No	No	Yes	2.17066	FBA1
5.54996	20.4534	10	172826	172846	113.516	YJL130C	0.74429	No	No	Yes	2.05506	FBA1
7.02288	17.6607	10	215221	215240	124.029	YJL109C	0.846515	No	No	Yes	2.09352	FBA1
0.00613767	1556.88	10	228254	228270	9.5556	snR37	-2.212	No	No	Yes	0.980258	FBA1
14.6733	13.7674	2	120244	120267	202.013	YBL052C	1.16653	No	No	Yes	2.30538	FBA1
0.954498	28.3733	10	234880	234900	27.0823	YJL101C	-0.0202251	No	No	Yes	1.43269	FBA1
0.119518	277.619	10	290801	290817	33.1806	YJL079C	-0.922566	No	No	Yes	1.52088	FBA1
1.75582	17.6942	10	400429	400446	31.0678	YJL020C	0.24448	No	No	Yes	1.49231	FBA1
0.0942609	520.625	10	453588	453605	49.0746	YJR009C	-1.02567	No	No	Yes	1.69086	FBA1
0.15744	520.625	10	454566	454583	81.9671	YJR009C	-0.802885	No	No	Yes	1.91364	FBA1
2.74747	63.2852	10	464386	464411	173.874	YJR016C	0.438932	No	No	Yes	2.24023	FBA1
3.51024	5.17085	10	512076	512094	18.1509	YJR041C	0.545336	No	No	Yes	1.2589	FBA1
0.940974	139.721	10	519557	519583	131.474	YJR045C	-0.0264224	No	No	Yes	2.11884	FBA1
5.84965	7.20725	10	592161	592198	42.1599	YJR090C	0.76713	No	No	Yes	1.6249	FBA1
7.51782	7.8691	10	598251	598270	59.1585	YJR091C	0.876092	No	No	Yes	1.77202	FBA1
0.734005	24.9247	10	636153	636171	18.2949	YJR111C	-0.134301	No	No	Yes	1.26233	FBA1
0.0984347	205.859	10	689797	689817	20.2637	YJR139C	-1.00685	No	No	Yes	1.30672	FBA1
0.558862	68.7372	2	134049	134067	38.4146	YBL045C	-0.252696	No	No	Yes	1.5845	FBA1
9.01335	4.5976	10	692932	692950	41.4398	YJR140C	0.954886	No	No	Yes	1.61742	FBA1
15.917	4.5976	10	693443	693474	73.1798	YJR140C	1.20186	No	No	Yes	1.86439	FBA1
0.56315	380.975	11	26268	26286	214.546	YKL216W	-0.249376	No	No	Yes	2.33152	FBA1
5.06445	28.3873	11	42211	42235	143.766	YKL210W	0.704533	No	No	Yes	2.15766	FBA1
9.94663	26.1945	11	54713	54735	260.548	YKL204W	0.997676	No	No	Yes	2.41589	FBA1
0.426564	61.9133	11	97350	97368	26.41	YKL184W	-0.370016	No	No	Yes	1.42177	FBA1
0.750272	68.7372	2	135104	135122	51.5716	YBL045C	-0.124781	No	No	Yes	1.71241	FBA1
0.0680349	9.8817	11	122822	122857	0.6723	YKL173W	-1.16727	No	No	Yes	-0.172437	FBA1
1.64515	27.8451	11	156219	156243	45.8094	YKL157W	0.216207	No	No	Yes	1.66095	FBA1
0.343118	266.179	11	178664	178684	91.3307	YKL142W	-0.464556	No	No	Yes	1.96062	FBA1
6.32611	17.6858	11	209324	209355	111.882	YKL125W	0.801137	No	No	Yes	2.04876	FBA1
4.1337	10.6173	11	250937	250954	43.8887	YKL101W	0.616339	No	No	Yes	1.64235	FBA1
12.9347	10.6173	11	253316	253337	137.332	YKL101W	1.11176	No	No	Yes	2.13777	FBA1
1.96635	27.9121	2	139673	139707	54.8849	YBL042C	0.29366	No	No	Yes	1.73945	FBA1
0.00897194	12400.7	11	259563	259580	111.258	YKL096W-A	-2.04711	No	No	Yes	2.04633	FBA1
0.435611	328.16	11	283189	283212	142.95	YKL081W	-0.360901	No	No	Yes	2.15519	FBA1
0.212904	328.16	11	283847	283869	69.8666	YKL081W	-0.671817	No	No	Yes	1.84427	FBA1
9.8506	14.8089	11	324089	324107	145.876	YKL062W	0.993463	No	No	Yes	2.16399	FBA1
0.463681	14.8089	11	324837	324865	6.8666	YKL062W	-0.333781	No	No	Yes	0.836742	FBA1
0.445951	156.346	11	364808	364826	69.7225	snR69	-0.350713	No	No	Yes	1.84337	FBA1
0.328968	173.7	11	370908	370938	57.1418	YKL035W	-0.482846	No	No	Yes	1.75695	FBA1
2.25453	15.2498	2	188447	188466	34.381	YBL017C	0.353056	No	No	Yes	1.53632	FBA1
0.0627114	2481.64	11	520711	520736	155.627	YKR042W	-1.20265	No	No	Yes	2.19209	FBA1
0.0325173	2268.89	11	552305	552330	73.7781	YKR057W	-1.48789	No	No	Yes	1.86793	FBA1
4.49303	20.8082	11	567854	567881	93.4916	YKR067W	0.652539	No	No	Yes	1.97077	FBA1
11.3279	15.985	11	625110	625134	181.077	YKR095W	1.05415	No	No	Yes	2.25786	FBA1
38.479	2.5657	11	656390	656411	98.7256	YKR103W	1.58522	No	No	Yes	1.99443	FBA1
11.1883	10.6523	11	4179	4210	119.181	YKL222C	1.04877	No	No	Yes	2.07621	FBA1
0.362534	6.49015	11	28121	28147	2.3529	YKL215C	-0.440651	No	No	Yes	0.371603	FBA1
2.43563	35.5853	11	229747	229772	86.6728	YKL110C	0.386612	No	No	Yes	1.93788	FBA1
4.32438	6.36265	11	241830	241852	27.5145	YKL105C	0.635924	No	No	Yes	1.43956	FBA1
0.130409	2887.52	11	334305	334328	376.559	YKL056C	-0.884692	No	No	Yes	2.57583	FBA1
14.3681	10.4604	11	347302	347321	150.297	YKL048C	1.1574	No	No	Yes	2.17695	FBA1
1.16469	51.0408	11	383438	383455	59.4466	YKL029C	0.0662091	No	No	Yes	1.77413	FBA1
9.09441	5.81325	11	415198	415219	52.8681	YKL014C	0.958775	No	No	Yes	1.72319	FBA1
5.78007	47.6024	11	427729	427748	275.145	YKL008C	0.761933	No	No	Yes	2.43956	FBA1
0.280886	544.656	11	431114	431134	152.986	snR87	-0.551471	No	No	Yes	2.18465	FBA1
0.25177	1266.59	11	559089	559110	318.89	snR42	-0.598996	No	No	Yes	2.50364	FBA1
0.164611	1266.59	11	559142	559168	208.495	snR42	-0.78354	No	No	Yes	2.3191	FBA1
0.0259545	1219.21	2	307228	307246	31.644	snR161	-1.58579	No	No	Yes	1.50029	FBA1
2.56705	52.6925	11	580132	580150	135.264	YKR075C	0.409435	No	No	Yes	2.13118	FBA1
0.465577	40.8422	11	603500	603519	19.0152	YKR087C	-0.332009	No	No	Yes	1.2791	FBA1
0.0528647	38.1484	12	30987	31004	2.0167	YLL055W	-1.27683	No	No	Yes	0.304641	FBA1
0.462472	274.11	12	89700	89725	126.768	YLL026W	-0.334914	No	No	Yes	2.10301	FBA1
0.00262778	274.11	12	89735	89755	0.7203	YLL026W	-2.58041	No	No	Yes	-0.142487	FBA1
0.19147	274.11	12	91275	91294	52.4839	YLL026W	-0.717898	No	No	Yes	1.72003	FBA1
6.80346	11.0527	12	104196	104213	75.1966	YLL021W	0.83273	No	No	Yes	1.8762	FBA1
5.9528	11.2931	12	115385	115409	67.2256	YLL016W	0.774722	No	No	Yes	1.82753	FBA1
2.18085	37.2987	12	181255	181276	81.3429	YLR019W	0.338625	No	No	Yes	1.91032	FBA1
0.0739854	2305.34	12	199120	199145	170.561	snR30	-1.13085	No	No	Yes	2.23188	FBA1
1.00809	116.367	12	254171	254191	117.309	YLR056W	0.00350112	No	No	Yes	2.06933	FBA1
0.297103	116.367	12	254229	254245	34.5731	YLR056W	-0.527092	No	No	Yes	1.53874	FBA1
4.06227	29.4801	2	352958	352984	119.756	YBR057C	0.608769	No	No	Yes	2.0783	FBA1
0.556657	116.367	12	254728	254757	64.7766	YLR056W	-0.254412	No	No	Yes	1.81142	FBA1
0.043762	2632.33	12	263693	263714	115.196	YLR061W	-1.3589	No	No	Yes	2.06144	FBA1
0.00197512	13736	12	499136	499152	27.1303	YLR167W	-2.70441	No	No	Yes	1.43345	FBA1
0.772317	126.649	2	375586	375605	97.8132	YBR068C	-0.112204	No	No	Yes	1.9904	FBA1
0.859226	57.1709	12	512574	512592	49.1227	YLR177W	-0.0658924	No	No	Yes	1.69128	FBA1
0.455224	283.959	12	515269	515288	129.265	YLR180W	-0.341775	No	No	Yes	2.11148	FBA1
40.3931	2.90655	12	526895	526915	117.404	YLR187W	1.60631	No	No	Yes	2.06968	FBA1
0.31839	339.185	12	637928	637951	107.993	YLR249W	-0.497041	No	No	Yes	2.0334	FBA1
0.112141	267.194	12	659226	659244	29.9634	YLR257W	-0.950235	No	No	Yes	1.47659	FBA1
0.0606074	4041.44	12	673670	673687	244.941	YLR264W	-1.21747	No	No	Yes	2.38906	FBA1
0.00456248	4041.44	12	673743	673760	18.439	YLR264W	-2.3408	No	No	Yes	1.26574	FBA1
0.410341	49.9678	12	681540	681559	20.5038	YLR270W	-0.386855	No	No	Yes	1.31183	FBA1
1.14068	21.6375	12	791095	791118	24.6814	YLR332W	0.0571627	No	No	Yes	1.39237	FBA1
0.0176204	3477.29	12	806864	806896	61.2713	YLR340W	-1.75398	No	No	Yes	1.78726	FBA1
2.82877	60.0745	12	815262	815285	169.937	YLR342W	0.451598	No	No	Yes	2.23029	FBA1
4.99999	34.0835	12	834630	834651	170.417	YLR353W	0.698969	No	No	Yes	2.23151	FBA1
0.90446	94.5542	12	845674	845693	85.5204	YLR359W	-0.0436109	No	No	Yes	1.93207	FBA1
431.615	0.5675	12	855631	855655	244.941	YLR366W	2.6351	No	No	Yes	2.38906	FBA1
0.00324737	561.84	12	856899	856918	1.8245	YLR367W	-2.48847	No	No	Yes	0.261144	FBA1
0.138767	148.796	12	867698	867712	20.6479	YLR372W	-0.857715	No	No	Yes	1.31488	FBA1
0.101476	21.7668	2	430482	430499	2.2088	YBR093C	-0.993638	No	No	Yes	0.344156	FBA1
4.9389	29.2743	12	952106	952127	144.583	YLR413W	0.69363	No	No	Yes	2.16012	FBA1
2.43999	94.8563	12	964139	964158	231.448	YLR420W	0.387388	No	No	Yes	2.36445	FBA1
0.413076	94.8563	12	964415	964438	39.1828	YLR420W	-0.38397	No	No	Yes	1.5931	FBA1
5.02127	8.3389	12	996242	996261	41.8719	YLR430W	0.700814	No	No	Yes	1.62192	FBA1
11.9944	17.9232	12	1034667	1034690	214.978	YLR450W	1.07898	No	No	Yes	2.33239	FBA1
8.46799	22.2682	12	1057844	1057869	188.567	YLR459W	0.927781	No	No	Yes	2.27547	FBA1
1.24423	174.632	2	483936	483958	217.283	YBR122C	0.0949015	No	No	Yes	2.33702	FBA1
7.55204	12.7037	12	38974	39004	95.9389	YLL051C	0.878065	No	No	Yes	1.98199	FBA1
12.9244	18.4094	12	42883	42902	237.931	YLL048C	1.11141	No	No	Yes	2.37645	FBA1
0.0391268	18.4094	12	46160	46183	0.7203	YLL048C	-1.40753	No	No	Yes	-0.142487	FBA1
0.205894	276.131	12	96225	96246	56.8536	YLL024C	-0.686357	No	No	Yes	1.75476	FBA1
1.23165	118.122	12	165846	165868	145.485	YLR008C	0.0904878	No	No	Yes	2.16282	FBA1
9.18559	6.2417	2	518782	518801	57.3337	YBR140C	0.963107	No	No	Yes	1.75841	FBA1
0.0173141	77.6534	12	200475	200498	1.3445	YLR028C	-1.7616	No	No	Yes	0.128561	FBA1
40.1358	5.65775	12	227708	227729	227.078	YLR039C	1.60353	No	No	Yes	2.35618	FBA1
0.0172084	2410.9	12	232865	232899	41.4877	YLR044C	-1.76426	No	No	Yes	1.61792	FBA1
0.000358455	2410.9	12	233513	233531	0.8642	YLR044C	-3.44557	No	No	Yes	-0.0633857	FBA1
9.02713	2.10645	12	240305	240324	19.0152	YLR047C	0.95555	No	No	Yes	1.2791	FBA1
0.291044	198.809	12	258257	258275	57.862	YLR058C	-0.536042	No	No	Yes	1.76239	FBA1
4.29807	7.06075	1	145452	145466	30.3476	YAL002W	0.633274	No	No	Yes	1.48212	FBA1
30.5418	6.2417	2	524003	524022	190.632	YBR140C	1.48489	No	No	Yes	2.2802	FBA1
0.00462842	134.884	12	259683	259702	0.6243	YLR059C	-2.33457	No	No	Yes	-0.204607	FBA1
1.24492	134.884	12	259761	259787	167.92	YLR059C	0.095141	No	No	Yes	2.2251	FBA1
3.51813	35.7463	12	294030	294051	125.76	YLR083C	0.546311	No	No	Yes	2.09954	FBA1
5.57264	4.95465	12	297293	297326	27.6105	YLR084C	0.746061	No	No	Yes	1.44107	FBA1
1.30735	20.0909	12	331872	331904	26.266	YLR095C	0.116393	No	No	Yes	1.41939	FBA1
2.58503	10.1236	12	353026	353059	26.1699	YLR106C	0.412465	No	No	Yes	1.4178	FBA1
12.1662	10.1236	12	356487	356507	123.166	YLR106C	1.08516	No	No	Yes	2.09049	FBA1
8.40491	10.1236	12	363437	363456	85.0884	YLR106C	0.924533	No	No	Yes	1.92987	FBA1
52.6749	6.2417	2	525437	525458	328.781	YBR140C	1.7216	No	No	Yes	2.51691	FBA1
3.57709	18.2832	12	382415	382435	65.4008	YLR117C	0.55353	No	No	Yes	1.81558	FBA1
2.24237	60.7949	12	386364	386386	136.325	YLR120C	0.350707	No	No	Yes	2.13457	FBA1
12.1545	4.9383	12	600828	600847	60.0228	YLR228C	1.08474	No	No	Yes	1.77832	FBA1
2.47753	108.67	12	663254	663276	269.234	YLR259C	0.394019	No	No	Yes	2.43013	FBA1
1.20946	112.755	2	548653	548677	136.372	YBR154C	0.0825904	No	No	Yes	2.13473	FBA1
4.14161	30.0983	12	676494	676518	124.655	YLR266C	0.617169	No	No	Yes	2.09571	FBA1
7.47755	30.0983	12	677083	677104	225.061	YLR266C	0.87376	No	No	Yes	2.3523	FBA1
18.2845	3.4324	12	689579	689611	62.7598	YLR273C	1.26208	No	No	Yes	1.79768	FBA1
5.22057	13.6129	12	700556	700574	71.0671	YLR278C	0.717718	No	No	Yes	1.85167	FBA1
4.35283	13.6129	12	702484	702501	59.2546	YLR278C	0.638771	No	No	Yes	1.77272	FBA1
0.221186	460.46	12	708372	708393	101.847	YLR286C	-0.655243	No	No	Yes	2.00795	FBA1
0.281356	460.46	12	708856	708878	129.553	YLR286C	-0.550744	No	No	Yes	2.11245	FBA1
0.069244	460.46	12	708892	708920	31.8841	YLR286C	-1.15962	No	No	Yes	1.50357	FBA1
0.142761	460.46	12	709009	709039	65.7355	YLR286C	-0.845392	No	No	Yes	1.8178	FBA1
0.47523	335.966	2	563396	563419	159.661	YBR162C	-0.323097	No	No	Yes	2.2032	FBA1
0.293348	460.46	12	709784	709807	135.075	YLR286C	-0.532617	No	No	Yes	2.13058	FBA1
0.141512	460.46	12	710225	710253	65.1608	YLR286C	-0.849205	No	No	Yes	1.81399	FBA1
0.661839	375.824	12	720703	720725	248.735	YLR293C	-0.179247	No	No	Yes	2.39574	FBA1
0.802951	8.43215	12	739545	739566	6.7706	YLR305C	-0.0953112	No	No	Yes	0.830627	FBA1
5.12519	8.43215	12	741688	741712	43.2164	YLR305C	0.70971	No	No	Yes	1.63565	FBA1
23.8373	8.94	12	755367	755388	213.105	YLR310C	1.37726	No	No	Yes	2.32859	FBA1
0.0719117	410.659	12	837873	837907	29.5312	YLR355C	-1.1432	No	No	Yes	1.47028	FBA1
0.21784	410.659	12	838344	838366	89.458	YLR355C	-0.661863	No	No	Yes	1.95162	FBA1
0.567544	89.8528	12	875831	875858	50.9954	YLR378C	-0.246001	No	No	Yes	1.70753	FBA1
0.0786091	335.966	2	564531	564548	26.41	YBR162C	-1.10453	No	No	Yes	1.42177	FBA1
2.94359	18.2704	12	890400	890418	53.7804	YLR384C	0.468877	No	No	Yes	1.73062	FBA1
21.754	9.35905	12	1010983	1011006	203.597	YLR436C	1.33754	No	No	Yes	2.30877	FBA1
13.0543	6.34885	12	1022007	1022026	82.8795	YLR442C	1.11575	No	No	Yes	1.91845	FBA1
1.13318	46.146	13	71851	71877	52.2919	YML100W	0.0543004	No	No	Yes	1.71843	FBA1
13.3308	29.245	2	579095	579115	389.86	YBR172C	1.12486	No	No	Yes	2.59091	FBA1
8.63955	32.0583	13	285040	285062	276.969	YMR010W	0.936491	No	No	Yes	2.44243	FBA1
1.1622	58.4633	13	288113	288143	67.9459	YMR011W	0.0652796	No	No	Yes	1.83216	FBA1
3.73956	58.4633	13	289041	289065	218.627	YMR011W	0.57282	No	No	Yes	2.3397	FBA1
4.53051	21.473	13	291728	291757	97.2834	YMR012W	0.656147	No	No	Yes	1.98804	FBA1
0.00888354	2529.69	13	297539	297554	22.4726	snR77	-2.05141	No	No	Yes	1.35165	FBA1
3.82698	8.41925	2	586767	586784	32.2203	YBR179C	0.582856	No	No	Yes	1.50813	FBA1
0.0269163	2529.69	13	297558	297576	68.0899	snR77	-1.56998	No	No	Yes	1.83308	FBA1
0.525545	269.354	13	297928	297948	141.558	snR75	-0.27939	No	No	Yes	2.15093	FBA1
0.00367312	1307.28	13	298316	298340	4.8018	snR73	-2.43496	No	No	Yes	0.681404	FBA1
0.180625	342.94	13	298554	298574	61.9435	snR72	-0.743222	No	No	Yes	1.792	FBA1
0.758725	342.94	13	298625	298648	260.197	snR72	-0.119916	No	No	Yes	2.4153	FBA1
4.26376	25.0241	13	338060	338083	106.697	YMR033W	0.629793	No	No	Yes	2.02815	FBA1
1.52438	90.7835	13	353441	353466	138.388	YMR043W	0.183093	No	No	Yes	2.1411	FBA1
4.66172	25.2879	13	486193	486212	117.885	YMR108W	0.668546	No	No	Yes	2.07146	FBA1
0.0120121	2258.58	13	511583	511600	27.1303	YMR122W-A	-1.92038	No	No	Yes	1.43345	FBA1
0.0604747	1085.43	13	626556	626575	65.641	snR83	-1.21843	No	No	Yes	1.81718	FBA1
0.177985	358.008	13	634514	634534	63.7202	YMR186W	-0.749616	No	No	Yes	1.80428	FBA1
13.8635	13.058	13	637360	637380	181.029	YMR189W	1.14187	No	No	Yes	2.25775	FBA1
3.15004	24.3441	13	645756	645785	76.6851	YMR191W	0.498316	No	No	Yes	1.88471	FBA1
0.0699419	693.41	13	651360	651392	48.4984	YMR194W	-1.15526	No	No	Yes	1.68573	FBA1
0.0142069	4035.61	13	652281	652301	57.3337	snR11	-1.8475	No	No	Yes	1.75841	FBA1
0.0362315	4035.61	13	652353	652380	146.216	snR11	-1.44091	No	No	Yes	2.165	FBA1
0.0131837	4035.61	13	652398	652416	53.2043	snR11	-1.87996	No	No	Yes	1.72595	FBA1
0.220184	4035.61	13	652508	652531	888.578	snR11	-0.657214	No	No	Yes	2.9487	FBA1
0.471044	301.132	13	654127	654146	141.846	YMR195W	-0.326938	No	No	Yes	2.15182	FBA1
0.0643024	920.004	13	733008	733026	59.1585	YMR230W	-1.19177	No	No	Yes	1.77202	FBA1
1.77599	60.7531	13	759721	759742	107.897	YMR246W	0.249441	No	No	Yes	2.03301	FBA1
2.02812	60.7531	13	761115	761142	123.215	YMR246W	0.307093	No	No	Yes	2.09066	FBA1
0.736108	78.9314	13	819966	819995	58.1021	YMR276W	-0.133058	No	No	Yes	1.76419	FBA1
35.0214	5.2157	13	875548	875574	182.661	YMR304W	1.54433	No	No	Yes	2.26165	FBA1
4.40462	10.3022	13	61495	61512	45.3773	YML104C	0.643909	No	No	Yes	1.65684	FBA1
0.111468	919.72	13	67781	67803	102.519	snR85	-0.952851	No	No	Yes	2.01081	FBA1
0.965199	27.213	13	96178	96196	26.266	YML086C	-0.0153833	No	No	Yes	1.41939	FBA1
4.8208	7.17165	13	113517	113534	34.5731	YML076C	0.683119	No	No	Yes	1.53874	FBA1
2.50745	23.6505	13	124939	124965	59.3025	YML072C	0.399232	No	No	Yes	1.77307	FBA1
0.0259727	22.181	2	617749	617779	0.5761	YBR198C	-1.58548	No	No	Yes	-0.239502	FBA1
3.20994	23.6505	13	128236	128256	75.9169	YML072C	0.506497	No	No	Yes	1.88034	FBA1
0.0196407	237.15	13	163773	163792	4.6578	YML056C	-1.70684	No	No	Yes	0.668181	FBA1
0.89012	54.7548	13	235448	235483	48.7384	YML018C	-0.0505513	No	No	Yes	1.68787	FBA1
4.16625	15.0409	13	241620	241638	62.6639	YML016C	0.619745	No	No	Yes	1.79702	FBA1
0.780502	109.756	13	252489	252505	85.6646	YML008C	-0.107626	No	No	Yes	1.9328	FBA1
14.2567	10.687	13	277731	277753	152.361	YMR006C	1.15402	No	No	Yes	2.18287	FBA1
1.27804	46.2886	13	281524	281541	59.1585	YMR008C	0.106543	No	No	Yes	1.77202	FBA1
2.13465	15.2514	13	339747	339764	32.5564	YMR034C	0.329327	No	No	Yes	1.51264	FBA1
9.43491	11.39	2	655455	655485	107.464	YBR216C	0.974738	No	No	Yes	2.03126	FBA1
9.43952	22.7131	13	428209	428230	214.401	YMR080C	0.97495	No	No	Yes	2.33123	FBA1
2.69549	31.086	13	448013	448033	83.7919	YMR089C	0.430637	No	No	Yes	1.9232	FBA1
0.095834	1203.26	13	499993	500014	115.313	YMR116C	-1.01848	No	No	Yes	2.06188	FBA1
0.242882	1203.26	13	500029	500048	292.251	YMR116C	-0.614604	No	No	Yes	2.46576	FBA1
2.59212	51.017	13	507418	507439	132.242	YMR120C	0.413654	No	No	Yes	2.12137	FBA1
3.17661	51.017	13	507987	508012	162.061	YMR120C	0.501965	No	No	Yes	2.20968	FBA1
1.30547	51.017	13	508955	508974	66.6013	YMR120C	0.115767	No	No	Yes	1.82348	FBA1
0.0239259	2416.29	13	550776	550800	57.812	YMR142C	-1.62113	No	No	Yes	1.76202	FBA1
1.48327	76.9835	13	555233	555252	114.187	YMR145C	0.171219	No	No	Yes	2.05762	FBA1
7.66531	15.1285	2	664101	664121	115.964	YBR220C	0.88453	No	No	Yes	2.06432	FBA1
0.0124715	76.9835	13	556044	556069	0.9601	YMR145C	-1.90408	No	No	Yes	-0.0176835	FBA1
1.69059	121.678	13	558074	558097	205.708	YMR146C	0.228039	No	No	Yes	2.31325	FBA1
18.4013	7.80765	13	567970	567992	143.671	YMR154C	1.26485	No	No	Yes	2.15737	FBA1
0.685276	129.212	13	623963	623983	88.5456	YMR181C	-0.164134	No	No	Yes	1.94717	FBA1
0.727511	62.5053	13	671787	671814	45.4733	YMR205C	-0.13816	No	No	Yes	1.65776	FBA1
10.1977	4.88765	13	705888	705905	49.843	YMR218C	1.0085	No	No	Yes	1.6976	FBA1
3.25434	19.1669	13	727057	727083	62.3757	YMR229C	0.512464	No	No	Yes	1.79502	FBA1
6.45359	19.1669	13	727850	727876	123.695	YMR229C	0.809801	No	No	Yes	2.09235	FBA1
0.852413	137.958	2	665337	665357	117.597	YBR221C	-0.0693502	No	No	Yes	2.0704	FBA1
0.0454959	864.405	13	762621	762638	39.3269	snR86	-1.34203	No	No	Yes	1.59469	FBA1
16.8366	8.7557	13	767875	767897	147.416	YMR247C	1.22625	No	No	Yes	2.16855	FBA1
4.7542	12.1101	13	790221	790241	57.5738	YMR261C	0.677077	No	No	Yes	1.76022	FBA1
3.21969	12.1101	13	793095	793118	38.9908	YMR261C	0.507814	No	No	Yes	1.59096	FBA1
0.457939	136.629	13	896862	896892	62.5678	YMR311C	-0.339192	No	No	Yes	1.79635	FBA1
6.59736	19.3096	14	25617	25640	127.392	YNL327W	0.81937	No	No	Yes	2.10514	FBA1
4.43638	19.3096	14	26051	26070	85.6645	YNL327W	0.647029	No	No	Yes	1.9328	FBA1
0.095372	6.5449	14	36134	36158	0.6242	YNL321W	-1.02058	No	No	Yes	-0.204676	FBA1
0.0702008	827.654	14	65875	65903	58.102	YNL300W	-1.15366	No	No	Yes	1.76419	FBA1
0.170048	827.654	14	66264	66294	140.741	YNL300W	-0.769428	No	No	Yes	2.14842	FBA1
0.516256	3424.08	14	89288	89306	1767.7	snR40	-0.287135	No	No	Yes	3.24741	FBA1
2.69524	24.8532	14	291751	291770	66.9855	YNL186W	0.430598	No	No	Yes	1.82598	FBA1
0.311062	24.8532	14	291895	291912	7.7309	YNL186W	-0.507153	No	No	Yes	0.88823	FBA1
3.11787	2.46415	14	312159	312191	7.6829	YNL172W	0.493858	No	No	Yes	0.885525	FBA1
3.36183	18.6827	14	333536	333554	62.808	YNL161W	0.526575	No	No	Yes	1.79801	FBA1
0.697192	220.396	14	379286	379309	153.658	YNL131W	-0.156648	No	No	Yes	2.18656	FBA1
1.3357	39.6887	14	448607	448641	53.0121	YNL094W	0.125708	No	No	Yes	1.72438	FBA1
4.31063	18.5695	14	457779	457808	80.0464	YNL088W	0.63454	No	No	Yes	1.90334	FBA1
3.88023	20.0105	14	468652	468672	77.6455	YNL085W	0.588857	No	No	Yes	1.89012	FBA1
0.00804752	179.024	14	493006	493029	1.4407	YNL071W	-2.09434	No	No	Yes	0.158574	FBA1
1.07721	155.75	14	502907	502928	167.775	YNL066W	0.0323005	No	No	Yes	2.22473	FBA1
2.01243	56.025	14	512431	512454	112.746	YNL061W	0.303721	No	No	Yes	2.0521	FBA1
6.38242	17.4922	14	533847	533866	111.643	YNL051W	0.804986	No	No	Yes	2.04783	FBA1
0.100367	33.4901	14	538910	538928	3.3613	YNL048W	-0.998409	No	No	Yes	0.526507	FBA1
0.00762827	201.435	14	545923	545947	1.5366	YNL044W	-2.11757	No	No	Yes	0.186561	FBA1
0.0140854	105.329	14	585650	585679	1.4836	NME1	-1.85123	No	No	Yes	0.171317	FBA1
0.586729	105.329	14	585727	585758	61.7995	NME1	-0.231562	No	No	Yes	1.79098	FBA1
2.09475	105.329	14	585806	585829	220.637	NME1	0.321132	No	No	Yes	2.34368	FBA1
1.04961	63.6363	14	669040	669060	66.7934	YNR021W	0.0210286	No	No	Yes	1.82473	FBA1
5.39326	17.3794	14	697074	697094	93.7317	YNR038W	0.731852	No	No	Yes	1.97189	FBA1
4.62392	24.778	14	705658	705687	114.571	YNR044W	0.66501	No	No	Yes	2.05908	FBA1
1.18841	60.6484	14	57267	57284	72.0754	YNL307C	0.0749677	No	No	Yes	1.85779	FBA1
0.50318	53.7268	14	106191	106208	27.0343	YNL283C	-0.298276	No	No	Yes	1.43192	FBA1
9.13968	9.07335	14	128489	128509	82.9275	YNL272C	0.960931	No	No	Yes	1.9187	FBA1
15.5706	8.16925	14	134513	134540	127.2	YNL271C	1.19231	No	No	Yes	2.10449	FBA1
0.78184	27.3921	14	181995	182012	21.4162	YNL248C	-0.106882	No	No	Yes	1.33074	FBA1
5.60788	14.9076	14	296460	296487	83.5998	YNL182C	0.748799	No	No	Yes	1.92221	FBA1
0.0850218	1101.4	2	235334	235355	93.6433	YBL003C	-1.07047	No	No	Yes	1.97148	ENO1
0.215213	2934.35	10	572287	572308	631.511	YJR073C	-0.667131	No	No	Yes	2.80038	ENO1
0.0286439	2934.35	10	572452	572473	84.0514	YJR073C	-1.54297	No	No	Yes	1.92454	ENO1
0.0203081	2934.35	10	572825	572844	59.5911	YJR073C	-1.69233	No	No	Yes	1.77518	ENO1
0.0133201	45.1874	10	582056	582071	0.6019	YJR080C	-1.87549	No	No	Yes	-0.220476	ENO1
0.0268114	3001.96	10	622807	622828	80.4867	YJR104C	-1.57168	No	No	Yes	1.90572	ENO1
5.44124	15.4399	10	630179	630200	84.0124	YJR109C	0.735698	No	No	Yes	1.92434	ENO1
4.20752	21.4795	10	661241	661260	90.3756	YJR127C	0.624026	No	No	Yes	1.95605	ENO1
0.469092	205.859	10	689764	689791	96.5669	YJR139C	-0.328742	No	No	Yes	1.98483	ENO1
0.369069	205.859	10	689978	689999	75.9762	YJR139C	-0.432893	No	No	Yes	1.88068	ENO1
0.0744429	1201.32	2	237153	237174	89.4297	YBL001C	-1.12818	No	No	Yes	1.95148	ENO1
0.158309	575.769	10	701993	702017	91.1495	YJR145C	-0.800494	No	No	Yes	1.95975	ENO1
18.8702	3.71845	10	714776	714796	70.1679	YJR151C	1.27578	No	No	Yes	1.84614	ENO1
1.9024	40.8163	11	36586	36619	77.6491	YKL212W	0.279303	No	No	Yes	1.89014	ENO1
7.65623	11.018	11	52322	52351	84.3563	YKL205W	0.884015	No	No	Yes	1.92612	ENO1
0.432771	48.6807	11	94506	94527	21.0676	YKL185W	-0.363742	No	No	Yes	1.32362	ENO1
0.970686	122.25	11	100773	100792	118.666	YKL182W	-0.0129211	No	No	Yes	2.07433	ENO1
1.14515	13.1409	2	248716	248738	15.0483	YBR007C	0.0588623	No	No	Yes	1.17749	ENO1
0.782879	122.25	11	101031	101054	95.707	YKL182W	-0.106305	No	No	Yes	1.98094	ENO1
0.168111	122.25	11	101193	101213	20.5516	YKL182W	-0.774403	No	No	Yes	1.31285	ENO1
2.2586	122.25	11	101355	101382	276.114	YKL182W	0.35384	No	No	Yes	2.44109	ENO1
0.815236	122.25	11	101565	101588	99.6626	YKL182W	-0.0887167	No	No	Yes	1.99853	ENO1
0.570454	122.25	11	101940	101965	69.738	YKL182W	-0.243779	No	No	Yes	1.84347	ENO1
0.765294	122.25	11	102360	102382	93.5572	YKL182W	-0.116172	No	No	Yes	1.97108	ENO1
0.635166	122.25	11	102996	103016	77.6491	YKL182W	-0.197112	No	No	Yes	1.89014	ENO1
1.50112	58.4297	2	253764	253787	87.7099	YBR008C	0.176415	No	No	Yes	1.94305	ENO1
0.0104615	1652.16	11	109284	109301	17.284	YKL180W	-1.98041	No	No	Yes	1.23764	ENO1
0.235356	404.091	11	153740	153762	95.1051	YKL160W	-0.628275	No	No	Yes	1.9782	ENO1
2.67744	27.8451	11	155549	155569	74.5535	YKL157W	0.42772	No	No	Yes	1.87247	ENO1
3.61931	27.8451	11	157361	157385	100.78	YKL157W	0.558626	No	No	Yes	2.00337	ENO1
3.784	50.0624	11	161541	161566	189.436	YKL154W	0.577951	No	No	Yes	2.27746	ENO1
0.0907601	1014.71	2	255236	255256	92.0954	YBR009C	-1.04211	No	No	Yes	1.96424	ENO1
1.06705	137.158	11	167504	167534	146.355	YKL150W	0.0281852	No	No	Yes	2.16541	ENO1
2.32038	24.9034	11	173442	173462	57.7854	YKL146W	0.365559	No	No	Yes	1.76182	ENO1
1.12922	83.7652	11	175368	175399	94.5891	YKL145W	0.0527775	No	No	Yes	1.97584	ENO1
0.577192	175.796	11	179993	180017	101.468	YKL141W	-0.23868	No	No	Yes	2.00633	ENO1
4.93988	11.8544	11	184464	184486	58.5593	YKL139W	0.693716	No	No	Yes	1.7676	ENO1
5.30941	17.6858	11	209386	209407	93.9012	YKL125W	0.725046	No	No	Yes	1.97267	ENO1
0.381291	435.486	11	221037	221059	166.047	YKL117W	-0.418743	No	No	Yes	2.22023	ENO1
0.286906	435.486	11	221098	221121	124.944	YKL117W	-0.54226	No	No	Yes	2.09671	ENO1
0.0159694	12400.7	11	259208	259229	198.031	YKL096W-A	-1.79671	No	No	Yes	2.29673	ENO1
0.0226405	12400.7	11	259541	259561	280.757	YKL096W-A	-1.64511	No	No	Yes	2.44833	ENO1
3.29709	20.3951	11	276108	276131	67.2443	YKL088W	0.518131	No	No	Yes	1.82766	ENO1
0.426596	328.16	11	284610	284633	139.992	YKL081W	-0.369983	No	No	Yes	2.1461	ENO1
1.00816	93.6525	11	285992	286012	94.4171	YKL080W	0.00353151	No	No	Yes	1.97505	ENO1
0.872274	93.6525	11	286131	286151	81.6906	YKL080W	-0.0593471	No	No	Yes	1.91217	ENO1
0.923217	49.7377	2	292953	292971	45.9187	YBR026C	-0.0346961	No	No	Yes	1.66199	ENO1
0.330655	285.026	11	314781	314805	94.2452	YKL067W	-0.480625	No	No	Yes	1.97426	ENO1
0.341516	285.026	11	315387	315412	97.3408	YKL067W	-0.466589	No	No	Yes	1.98829	ENO1
3.25753	14.8089	11	324023	324045	48.2404	YKL062W	0.512888	No	No	Yes	1.68341	ENO1
0.466337	173.7	11	369905	369929	81.0027	YKL035W	-0.3313	No	No	Yes	1.9085	ENO1
1.31548	173.7	11	371404	371429	228.499	YKL035W	0.119084	No	No	Yes	2.35888	ENO1
0.00297006	173.7	11	371475	371506	0.5159	YKL035W	-2.52723	No	No	Yes	-0.287434	ENO1
0.28318	340.705	11	465028	465051	96.4809	YKR013W	-0.547937	No	No	Yes	1.98444	ENO1
1.2021	79.831	2	309384	309409	95.965	YBR036C	0.0799416	No	No	Yes	1.98211	ENO1
21.6871	4.3893	11	481698	481719	95.191	YKR021W	1.3362	No	No	Yes	1.9786	ENO1
3.16535	27.3562	11	515152	515173	86.592	YKR039W	0.500422	No	No	Yes	1.93748	ENO1
10.2316	27.3562	11	516909	516938	279.898	YKR039W	1.00994	No	No	Yes	2.447	ENO1
0.0257107	2481.64	11	520052	520079	63.8047	YKR042W	-1.58989	No	No	Yes	1.80485	ENO1
0.0101873	2481.64	11	520444	520467	25.2811	YKR042W	-1.99194	No	No	Yes	1.4028	ENO1
0.02578	2481.64	11	520475	520494	63.9766	YKR042W	-1.58872	No	No	Yes	1.80602	ENO1
0.115767	2481.64	11	520808	520828	287.293	YKR042W	-0.936414	No	No	Yes	2.45833	ENO1
7.8165	9.989	11	549353	549380	78.079	YKR055W	0.893012	No	No	Yes	1.89253	ENO1
4.44212	22.1261	2	360826	360850	98.2867	YBR060C	0.64759	No	No	Yes	1.99249	ENO1
0.00788881	139.755	11	579721	579748	1.1025	YKR074W	-2.10299	No	No	Yes	0.0423786	ENO1
7.59204	11.3263	11	593945	593968	85.9901	YKR082W	0.880358	No	No	Yes	1.93445	ENO1
7.85777	11.3263	11	594829	594850	88.9998	YKR082W	0.895299	No	No	Yes	1.94939	ENO1
6.224	15.985	11	621209	621233	99.4906	YKR095W	0.794069	No	No	Yes	1.99778	ENO1
4.40787	5.52085	11	629458	629485	24.3352	YKR096W	0.644229	No	No	Yes	1.38623	ENO1
37.8052	2.5657	11	656090	656114	96.9968	YKR103W	1.57755	No	No	Yes	1.98676	ENO1
14.0821	4.97055	11	42872	42892	69.9959	YKL209C	1.14867	No	No	Yes	1.84507	ENO1
13.4247	4.97055	11	42978	43003	66.7283	YKL209C	1.12791	No	No	Yes	1.82431	ENO1
0.0665417	502.79	2	372049	372075	33.4565	YBR067C	-1.17691	No	No	Yes	1.52448	ENO1
19.1201	4.86165	11	60286	60316	92.9553	YKL203C	1.28149	No	No	Yes	1.96827	ENO1
0.199477	6.89705	11	139108	139133	1.3758	YKL165C	-0.700108	No	No	Yes	0.138555	ENO1
0.779858	121.4	11	200820	200841	94.6751	YKL128C	-0.107985	No	No	Yes	1.97624	ENO1
5.28129	20.5474	11	243050	243080	108.517	YKL104C	0.72274	No	No	Yes	2.0355	ENO1
3.75391	20.5474	11	244655	244675	77.1331	YKL104C	0.574484	No	No	Yes	1.88724	ENO1
1.44758	57.0266	11	254813	254838	82.5506	YKL100C	0.160643	No	No	Yes	1.91672	ENO1
0.191139	3436.19	11	326830	326856	656.789	YKL060C	-0.718651	No	No	Yes	2.81743	ENO1
0.0487985	3436.19	11	327058	327080	167.681	YKL060C	-1.31159	No	No	Yes	2.22448	ENO1
0.0472218	3436.19	11	327411	327431	162.263	YKL060C	-1.32586	No	No	Yes	2.21022	ENO1
18.3293	4.77115	11	343381	343413	87.4519	YKL050C	1.26315	No	No	Yes	1.94177	ENO1
9.40749	7.5867	11	398959	398980	71.3718	YKL020C	0.973474	No	No	Yes	1.85353	ENO1
8.04717	10.2797	11	421689	421709	82.7225	YKL010C	0.905643	No	No	Yes	1.91762	ENO1
5.89942	11.4422	11	458815	458838	67.5023	YKR010C	0.770809	No	No	Yes	1.82932	ENO1
0.66571	132.012	11	521512	521542	87.8819	YKR043C	-0.176715	No	No	Yes	1.9439	ENO1
1.41145	4.2037	11	540886	540915	5.9333	YKR054C	0.149665	No	No	Yes	0.773296	ENO1
23.8516	4.2037	11	546172	546198	100.265	YKR054C	1.37752	No	No	Yes	2.00115	ENO1
0.805931	126.649	2	375038	375061	102.07	YBR068C	-0.0937024	No	No	Yes	2.0089	ENO1
2.85858	27.8254	11	561480	561501	79.5409	YKR063C	0.45615	No	No	Yes	1.90059	ENO1
0.00533471	128.948	11	565434	565459	0.6879	YKR065C	-2.27289	No	No	Yes	-0.162475	ENO1
2.09166	35.52	11	640047	640069	74.2955	YKR100C	0.32049	No	No	Yes	1.87096	ENO1
2.49979	38.1484	12	31387	31411	95.363	YLL055W	0.397904	No	No	Yes	1.97938	ENO1
3.54279	29.1747	12	51552	51577	103.36	YLL043W	0.549345	No	No	Yes	2.01435	ENO1
0.716992	37.2987	12	181002	181024	26.7429	YLR019W	-0.144486	No	No	Yes	1.42721	ENO1
0.0419257	2305.34	12	199003	199011	96.653	snR30	-1.37752	No	No	Yes	1.98522	ENO1
0.303486	2305.34	12	199276	199300	699.637	snR30	-0.517862	No	No	Yes	2.84487	ENO1
0.133602	618.53	12	242904	242927	82.6365	YLR048W	-0.874189	No	No	Yes	1.91717	ENO1
0.145836	618.53	12	243478	243501	90.2036	YLR048W	-0.836137	No	No	Yes	1.95522	ENO1
[truncated: 1,007 more rows]
