# Supplementary material for: RNA promotes phase separation of glycolysis enzymes into yeast G bodies in hypoxia
Source: eLife. 2020 Apr 16;9:e48480. doi: 10.7554/eLife.48480 (PMC7162659; doi:10.7554/eLife.48480)
Supplement: Figure 2—figure supplement 1—source data 1. [file elife-48480-fig2-figsupp1-data1.xlsx]

## Sheet: Sheet1
Source data for Figure 2 Figure Supplement 1C. Data represent % of flowthrough for IP RNA for each replicate for each probe
	% of flowthrough
Replicate number	1	2	3	1	2	3	unpaired student's T Test
qPCR Probe	By4742			Pfk2-GFP-Flag::His3			p value	Bonferroni correction
AHP1	0.143034	0.942809	0.859725	2.65994	5.39655	3.73345	0.0435321	0.522386
RPL5	0.0147663	0.705503	0.948068	1.51392	3.42323	3.12263	0.051092	0.613104
CPR1	0.0343935	0.34365	0.247918	2.31818	2.53815	2.37318	8.09224e-05	0.000971069
TDH3	0.195153	1.42519	0.953845	4.89903	7.55195	5.77045	0.0108345	0.130014
YEF3	0.31771	1.12159	1.01972	5.34565	4.94753	6.67084	0.00412501	0.0495002
TPI1	0.184373	0.90059	1.01135	3.31615	5.25883	5.31921	0.0164856	0.197828
CUP1-2	0.15089	0.763446	0.7764	2.45621	2.30447	2.78323	0.0023796	0.0285552
TRX2	0.211306	1.34253	1.44411	2.93572	6.17987	4.51075	0.0472574	0.567089
OPI11	0.218732	1.15161	1.43076	2.94962	3.74774	4.08713	0.00602497	0.0722997
LEU1	0.0218057	0.876485	0.945367	2.75687	3.40444	4.98357	0.027406	0.328872
PAU5	0.0663159	0.803923	1.02967	1.70228	2.57721	2.3348	0.0162071	0.194485
SND3	0.199568	0.961417	0.946995	2.96452	3.35437	3.16919	0.00403168	0.0483802
