# Supplementary material for: RNA promotes phase separation of glycolysis enzymes into yeast G bodies in hypoxia
Source: eLife. 2020 Apr 16;9:e48480. doi: 10.7554/eLife.48480 (PMC7162659; doi:10.7554/eLife.48480)
Supplement: Figure 3—figure supplement 1—source data 1. [file elife-48480-fig3-figsupp1-data1.xlsx]

## Sheet: Sheet1
	mRNA	UTH1			YML133			FAS1			CDC19			OLE1
	GFP tagged protein	PFK2	FBA1	ENO2	PFK2	FBA1	ENO2	PFK2	FBA1	ENO2	PFK2	FBA1	ENO2	PFK2	FBA1	ENO2
number of foci	q1	17	31	16.5	16	16	23	20	29	23	35	53	36	48	44.25	61
	min	2	5	2	3	5	3	2	4	7	4	15	8	14	16	29
	max	22.5	40	22	20	23	30.5	27	44.5	32	51	66	46	60.5	58	81
	med	72	117	64	59	54	62	81	96	78	130	101	114	193	141	168
	q3	32.25	49	31	27	31	36	37	58	40	70	80	54	87	70	105
