# Supplementary material for: RNA promotes phase separation of glycolysis enzymes into yeast G bodies in hypoxia
Source: eLife. 2020 Apr 16;9:e48480. doi: 10.7554/eLife.48480 (PMC7162659; doi:10.7554/eLife.48480)
Supplement: Figure 3—figure supplement 1—source data 2. [file elife-48480-fig3-figsupp1-data2.xlsx]

## Sheet: Sheet1
	RPKM	RPKM stdev	Number of mRNAs	number of mRNAs stdev
YML133C	1.19749	0.0102853	25.5973	10.2859
FAS1	52.4876	1.62561	34.1945	17.3656
UTH1	15.175	3.31744	29.554	14.6275
CDC19	102.065	4.88978	52.9488	22.755
OLE1	284.118	58.6792	69.0657	29.3464
