# Supplementary material for: RNA promotes phase separation of glycolysis enzymes into yeast G bodies in hypoxia
Source: eLife. 2020 Apr 16;9:e48480. doi: 10.7554/eLife.48480 (PMC7162659; doi:10.7554/eLife.48480)
Supplement: Figure 3—figure supplement 1—source data 3. [file elife-48480-fig3-figsupp1-data3.xlsx]

## Sheet: Sheet1
CDC19					OLE1					FAS1					UTH1					YML133C
distance from G body center	angle	x coordinate	y coordinate		distance from G body center	angle	x coordinate	y coordinate		distance from G body center	angle	x coordinate	y coordinate		distance from G body center	angle	x coordinate	y coordinate		distance from G body center	angle	x coordinate	y coordinate
1.12609	111.38	-0.410515	1.0486		1.96374	-94.8405	-0.165706	-1.95674		2.18077	-109.301	-0.720819	-2.0582		0.0338974	84.4652	0.0032694	0.0337393		1.59715	-155.965	-1.45867	-0.650523
1.59832	-17.3115	1.52592	-0.475607		1.34403	-114.042	-0.547567	-1.22743		1.94153	-92.7409	-0.0928431	-1.93931		3.11293	16.9127	2.97829	0.905598		2.12606	-164.014	-2.04385	-0.585504
3.12868	-8.79756	3.09187	-0.478512		1.30049	-63.6312	0.57761	-1.16518		3.24479	-146.205	-2.69652	-1.80483		1.62943	48.5941	1.07769	1.22214		0.2233	130.685	-0.145568	0.16933
0.229339	108.108	-0.071279	0.217981		1.47064	-28.5596	1.29169	-0.703072		2.92351	-160.839	-2.76154	-0.959574		2.5804	-45.3317	1.81402	-1.83515		2.39382	161.298	-2.26743	0.767553
2.6973	9.7857	2.65805	0.458443		1.47131	-146.021	-1.22007	-0.822306		0.655094	-137.873	-0.48586	-0.439418		1.13533	-48.6116	0.750632	-0.851771		0.13632	-55.7968	0.0766297	-0.112744
1.75728	37.0904	1.40176	1.05977		1.4065	-14.7567	1.36011	-0.358258		1.69002	-160.309	-1.59119	-0.569457		2.96257	-12.0178	2.89764	-0.616855		1.67589	152.484	-1.48631	0.774259
2.85628	27.4687	2.53428	1.3175		0.570339	177.694	-0.569877	0.0229481		0.324929	-32.6989	0.273434	-0.175535		0.19133	-15.1278	0.184699	-0.049932		2.58519	157.979	-2.39658	0.969318
3.00135	157.028	-2.76333	1.17136		1.05586	1.10881	1.05566	0.0204322		1.20118	179.25	-1.20107	0.015719		1.78399	-3.25081	1.78112	-0.101165		1.572	62.1856	0.733507	1.39037
1.65408	127.911	-1.01633	1.30501		0.298489	142.624	-0.237201	0.181195		0.125241	139.86	-0.095743	0.0807385		2.56496	1.57366	2.56399	0.0704394		2.69401	66.0853	1.09209	2.46273
4.25643	160.297	-4.00722	1.43505		0.45601	14.9314	0.440613	0.117497		0.213005	56.0612	0.118922	0.176716		2.10692	-34.9211	1.72755	-1.2061		2.90226	108.309	-0.911702	2.75534
2.74965	113.392	-1.09165	2.52366		1.34543	-88.9874	0.0237768	-1.34522		3.6876	173.693	-3.66528	0.405114		2.63272	-4.64471	2.62407	-0.213189		0.387933	1.10228	0.387861	0.00746275
4.21925	128.253	-2.6123	3.31331		1.3906	-129.275	-0.880307	-1.07648		2.86551	161.463	-2.71684	0.911003		0.712017	-3.91076	0.710359	-0.0485614		1.43559	10.748	1.41041	0.267722
5.04368	132.682	-3.41928	3.70773		1.06381	-25.1296	0.963122	-0.451765		1.97329	166.195	-1.91629	0.470856		0.637713	48.0396	0.426386	0.474208		0.971979	144.486	-0.79117	0.564618
3.94812	112.635	-1.51946	3.64402		1.25112	0.94435	1.25095	0.0206201		0.918469	144.307	-0.745938	0.535875		2.01473	-137.287	-1.48035	-1.36664		2.88236	17.745	2.74522	0.878489
5.21828	126.096	-3.0743	4.21653		1.52924	5.78145	1.52146	0.154046		3.70813	163.681	-3.55873	1.04196		0.0151495	69.5336	0.00529717	0.0141933		0.648831	49.0035	0.425642	0.489705
1.78604	-129.143	-1.12744	-1.38521		0.972697	28.3008	0.856432	0.461156		1.416	-25.7505	1.27538	-0.615185		0.916726	147.991	-0.77735	0.485916		1.62546	126.774	-0.973102	1.30199
3.15472	-15.7894	3.03569	-0.858407		1.02091	140.547	-0.788297	0.648733		1.86298	-2.64683	1.861	-0.0860314		0.790888	59.5098	0.401289	0.681521		1.32762	55.12	0.759215	1.08912
4.11973	-17.1836	3.93584	-1.21711		0.620941	118.795	-0.29909	0.544163		0.806002	177.51	-0.805242	0.0350105		0.583187	52.9613	0.351285	0.465516		1.51104	87.8162	0.0575775	1.50994
0.878604	-40.0079	0.672972	-0.564849		1.49535	55.4547	0.847947	1.23168		0.255468	11.4212	0.25041	0.0505878		2.24034	32.6087	1.8872	1.20732		1.9689	85.3167	0.160758	1.96232
2.79509	-6.62667	2.77641	-0.322552		1.49264	-102.942	-0.334292	-1.45473		2.35439	14.2105	2.28235	0.577971		3.5363	27.6954	3.13115	1.64357		1.7412	-79.2146	0.325834	-1.71045
0.476874	-77.1975	0.105671	-0.465018		1.08028	-47.7774	0.725962	-0.79999		0.643077	67.4727	0.246378	0.594008		3.21408	34.6877	2.64283	1.82914		1.95479	-44.2493	1.40024	-1.36402
1.12762	-178.994	-1.12744	-0.0198029		2.2725	-19.038	2.1482	-0.741279		1.1113	44.8814	0.787434	0.78418		2.40507	112.331	-0.913832	2.22469		1.36986	-66.1686	0.553487	-1.25306
0.0503343	46.5018	0.0346467	0.0365123		3.15116	-9.34972	3.10929	-0.511937		3.2446	32.6052	2.73326	1.74835		0.663048	121.973	-0.351093	0.562465		1.28635	-115.868	-0.561227	-1.15746
0.522072	34.7265	0.429081	0.297403		0.33973	-29.936	0.294404	-0.169536		2.47079	50.718	1.56435	1.91248		0.560704	-101.129	-0.108222	-0.550161		0.502262	-89.7649	0.00206125	-0.502258
4.52853	6.55612	4.49892	0.517051		0.300227	51.7513	0.185864	0.235778		3.08745	40.8608	2.33504	2.01988		0.664756	58.0998	0.351285	0.564358		1.36946	-13.3604	1.33239	-0.316448
1.75293	138.977	-1.3225	1.15055		1.07463	153.267	-0.959768	0.483405		2.18102	88.9488	0.040012	2.18065		1.81005	21.3563	1.68576	0.659158		2.86386	3.01117	2.8599	0.15044
1.6044	-111.474	-0.587334	-1.49302		3.69703	13.9552	3.58791	0.89159		4.39873	-162.969	-4.20583	-1.28832		1.93849	-61.1798	0.934473	-1.69838		0.994051	53.9201	0.585409	0.803388
3.00072	-152.858	-2.67028	-1.3689		1.2548	59.265	0.641286	1.07855		3.12781	-158.265	-2.90544	-1.15828		1.50597	-86.6036	0.0892196	-1.50332		0.93169	109.821	-0.31592	0.876493
1.7744	-143.967	-1.43491	-1.0438		1.46737	119.583	-0.724409	1.27609		2.44792	-153.474	-2.19023	-1.09326		0.236009	-178.088	-0.235878	-0.00787232		1.70533	28.5305	1.49824	0.814514
0.146608	-69.0878	0.0523299	-0.136951		2.36845	45.752	1.65262	1.69658		2.96252	-145.929	-2.45398	-1.65967		1.3523	158.129	-1.25496	0.503762		1.13316	-146.149	-0.941072	-0.631218
0.611462	-16.2239	0.587112	-0.170837		1.1934	-101.122	-0.230213	-1.17099		3.06864	-172.052	-3.03916	-0.424303		1.06568	24.8079	0.967339	0.447135		1.01707	171.575	-1.00609	0.149016
1.82986	-29.3479	1.59501	-0.896832		2.00432	-141.128	-1.56047	-1.25788		2.17792	-177.086	-2.17511	-0.110736		2.54997	-53.8557	1.50402	-2.05919		0.935951	60.8572	0.455797	0.817468
1.09921	-26.7749	0.981357	-0.49518		1.3355	-122.381	-0.715215	-1.12784		3.51711	171.177	-3.4755	0.539459		1.92209	-50.891	1.21245	-1.49144		1.85783	143.623	-1.49579	1.10187
0.666009	-93.9894	-0.0463357	-0.664395		0.8261	-98.5227	-0.122429	-0.816977		3.08814	146.974	-2.58916	1.6831		0.740903	-105.39	-0.196633	-0.714334		0.396671	174.787	-0.39503	0.036042
0.530714	-49.6262	0.343781	-0.404317		0.740581	-72.0483	0.228258	-0.704527		2.56011	135.158	-1.81525	1.80528		2.27527	-19.7789	2.14105	-0.769934		1.00245	73.1694	0.290252	0.95951
2.44803	-8.99415	2.41793	-0.38271		2.40812	177.441	-2.40572	0.107532		1.28732	-44.4872	0.918385	-0.902091		1.65786	-155.445	-1.50793	-0.688947		0.318257	168.707	-0.312095	0.0623231
0.51548	-147.854	-0.436453	-0.274278		2.29571	170.824	-2.26633	0.3661		1.54681	-91.392	-0.0375749	-1.54635		0.617761	165.344	-0.597659	0.156307		0.141121	77.4804	0.0305915	0.137766
1.9043	-2.23008	1.90286	-0.0741011		0.836855	158.803	-0.780234	0.302591		2.03781	-119.876	-1.01507	-1.767		1.3857	-61.4284	0.662718	-1.21695		1.44688	167.192	-1.41089	0.320744
0.306743	170.583	-0.302609	0.0501888		1.4177	141.23	-1.10533	0.887766		2.51071	-144.949	-2.05538	-1.4419		2.06511	-137.414	-1.52046	-1.39746		0.641844	60.9187	0.311968	0.560927
2.56084	5.49807	2.54906	0.24536		2.34553	152.506	-2.08062	1.08282		2.41295	-17.5274	2.30093	-0.726689		0.877665	-91.6328	-0.0250075	-0.877309		2.05028	98.5999	-0.306587	2.02723
1.57703	16.2363	1.51413	0.440937		1.67373	-78.507	0.333487	-1.64017		2.75695	-108.526	-0.875999	-2.61408		1.03068	-147.603	-0.870261	-0.552211		2.80838	128.573	-1.75104	2.19565
1.22552	141.313	-0.956609	0.766034		1.3244	-122.255	-0.706825	-1.12001		1.45973	-86.4705	0.0898648	-1.45696		0.539064	-13.0738	0.525091	-0.12194		3.17108	74.7221	0.835583	3.05901
2.54255	16.6931	2.4354	0.730334		0.992692	-85.7591	0.0734091	-0.989974		1.01592	-45	0.718365	-0.718365		0.237439	-80.8935	0.0375792	-0.234446		3.20035	93.1276	-0.17461	3.19559
2.76849	18.8849	2.61946	0.896073		0.539852	-71.2651	0.173395	-0.511248		0.820825	-44.9114	0.581308	-0.579513		1.39451	25.2294	1.26149	0.594401		1.81937	-122.522	-0.978138	-1.53406
1.38443	118.438	-0.659266	1.21738		0.982682	-35.0958	0.804022	-0.564989		0.0282095	-25.4298	0.0254764	-0.0121133		1.4113	90.6544	-0.0161195	1.41121		0.838571	-134.605	-0.588856	-0.597034
1.31738	118.644	-0.631511	1.15615		1.46798	-12.7317	1.43189	-0.323522		1.80551	-4.9674	1.79873	-0.156337		2.01622	101.581	-0.404767	1.97517		1.69502	176.01	-1.69091	0.117952
1.27641	106.108	-0.354137	1.2263		0.187245	-175.503	-0.186669	-0.0146818		0.430261	40.2998	0.328148	0.278287		2.89443	109.667	-0.974142	2.72558		2.80303	-34.8312	2.30084	-1.60098
1.61346	81.2271	0.246082	1.59458		0.538841	-30.6578	0.463526	-0.27476		3.00576	-80.0335	0.520213	-2.9604		2.33431	-40.073	1.78628	-1.50275		0.923981	-66.2678	0.371867	-0.845846
1.98679	116.27	-0.879366	1.78158		0.56756	154.382	-0.511766	0.245396		3.03551	-3.7292	3.02908	-0.197432		3.38074	-71.9598	1.04696	-3.21455		1.28246	-17.8181	1.22095	-0.392428
2.6247	47.2648	1.78115	1.92784		0.920041	9.75938	0.906726	0.155957		0.438843	3.81829	0.437869	0.0292236		3.33566	-49.8989	2.14863	-2.55148		1.72751	-17.9466	1.64346	-0.5323
2.28953	53.1903	1.3718	1.83307		0.855445	113.085	-0.335419	0.786944		2.82935	-0.124084	2.82934	-0.00612744		1.82846	-39.4691	1.41151	-1.16228		2.18994	-4.80369	2.18225	-0.18339
2.06694	84.4419	0.200193	2.05723		1.28549	-99.7905	-0.218592	-1.26677		2.63863	-141.819	-2.07412	-1.63106		2.1794	-94.5434	-0.172638	-2.17255		0.399259	-176.728	-0.398608	-0.0227903
1.08887	-141.416	-0.851164	-0.679093		1.09904	-90.8742	-0.0167674	-1.09891		1.42508	-129.13	-0.899342	-1.10546		1.91333	-105.078	-0.497736	-1.84745		0.817751	121.471	-0.426915	0.697467
1.28739	-23.5976	1.17974	-0.515358		1.01131	-117.869	-0.472746	-0.894018		3.63499	-157.889	-3.36767	-1.3682		3.15229	-146.988	-2.64338	-1.71741		2.73037	11.4071	2.67644	0.540008
0.602625	15.3992	0.58099	0.160022		2.56121	-161.115	-2.42333	-0.828999		3.82132	-170.119	-3.76463	-0.655768		2.67037	-136.225	-1.92816	-1.84745		1.05839	52.884	0.638666	0.843977
1.54116	-38.0125	1.21424	-0.949096		1.02558	-57.5906	0.549677	-0.865839		2.81726	-171.926	-2.78934	-0.39569		1.32167	40.2237	1.00914	0.8535		2.2138	49.8343	1.42791	1.69175
0.733609	-79.3528	0.135542	-0.720979		0.545166	21.6704	0.506636	0.201312		1.80868	-165.243	-1.74902	-0.46071		2.11586	147.949	-1.79335	1.12284		0.998423	-79.0658	0.189382	-0.980297
1.95757	-145.141	-1.6063	-1.11888		1.13243	172.577	-1.12294	0.146294		3.40901	158.854	-3.17945	1.2298		0.707517	-104.74	-0.180014	-0.684233		3.72439	-67.8673	1.40318	-3.44996
2.02443	-152.849	-1.80136	-0.923819		0.421638	60.1773	0.209688	0.3658		3.78313	156.968	-3.48158	1.48011		0.760413	120.164	-0.382085	0.65745		3.28401	-71.8069	1.02534	-3.11984
0.968902	-12.3037	0.946648	-0.206467		0.961034	106.109	-0.26666	0.923298		1.98998	-76.9497	0.44935	-1.93859		1.18807	144.119	-0.962623	0.69633		2.33669	-99.8231	-0.398657	-2.30243
1.55203	-12.814	1.51338	-0.344221		2.11673	154.042	-1.90318	0.926528		3.04313	-19.8714	2.86194	-1.03439		2.74423	32.6039	2.31178	1.47867		1.88798	-80.9612	0.296607	-1.86453
1.67537	169.441	-1.647	0.307019		3.11684	-90.7162	-0.0389575	-3.1166		0.750281	-33.2037	0.627782	-0.410867		1.93241	91.5524	-0.0523503	1.9317		2.10544	-112.191	-0.79521	-1.94949
0.56907	18.6003	0.539346	0.181513		2.89482	-79.4504	0.530003	-2.84588		2.05542	-18.4457	1.94982	-0.650348		3.28911	127.999	-2.02495	2.59187		2.0841	-51.3629	1.30128	-1.62792
0.288179	69.4539	0.10114	0.269848		3.33048	-118.748	-1.60184	-2.91997		3.17015	-4.20444	3.16161	-0.232421		0.363672	163.33	-0.348388	0.104322		1.61566	-53.5317	0.960316	-1.29929
0.936688	148.48	-0.798486	0.489697		2.75782	-69.4161	0.969591	-2.58175		2.84735	6.47854	2.82916	0.321269		0.549364	31.8244	0.466777	0.28969		2.52504	-158.896	-2.35568	-0.909177
2.06493	-77.7711	0.43739	-2.01808		2.58094	-119.358	-1.26534	-2.24949		1.5751	27.7829	1.39352	0.734188		1.30804	114.427	-0.540912	1.19095		1.55417	-152.646	-1.38039	-0.714119
2.21444	-113.786	-0.893115	-2.02635		2.05353	-130.798	-1.34177	-1.55456		3.57625	18.6102	3.38925	1.14128		2.47151	-10.1674	2.4327	-0.436281		1.06719	-20.1653	1.00177	-0.367893
1.78921	-62.1363	0.836222	-1.58177		1.18106	-100.351	-0.212209	-1.16184		1.17431	93.7492	-0.0767882	1.1718		1.17292	-20.0433	1.10188	-0.401996		1.50331	-10.0057	1.48044	-0.261195
2.66836	-29.8949	2.31331	-1.32994		1.63815	-149.178	-1.40679	-0.839343		2.91715	-103.878	-0.699688	-2.83199		3.07118	-7.07115	3.04782	-0.378068		3.02115	-7.15781	2.9976	-0.376443
3.74414	-26.2047	3.35933	-1.65334		0.888598	-40.684	0.673839	-0.579265		3.49497	-117.47	-1.61215	-3.10093		2.39032	2.9812	2.38708	0.124316		0.0238027	17.0358	0.0227583	0.00697343
1.69377	-39.6146	1.3048	-1.07999		1.11945	-57.0332	0.60915	-0.939199		3.84099	-62.7281	1.75999	-3.41403		1.72908	47.7196	1.16325	1.27928		0.925371	12.6521	0.902901	0.202685
1.46816	-151.973	-1.29598	-0.689868		0.718969	155.763	-0.655598	0.29514		3.17574	-85.6729	0.239609	-3.16669		3.55242	-140.239	-2.73082	-2.27207		3.04037	7.58508	3.01376	0.401323
2.0982	-9.36797	2.07022	-0.341534		1.36238	33.1297	1.1409	0.744589		2.82603	-65.8654	1.15551	-2.579		3.40234	-151.53	-2.9909	-1.62188		2.11676	16.6214	2.02831	0.60549
0.217504	-151.227	-0.19065	-0.104692		1.16178	57.4348	0.625341	0.979127		0.281262	-23.5149	0.257905	-0.11222		1.83852	-171.981	-1.82055	-0.256466		0.488028	97.4297	-0.0631067	0.483931
1.13142	6.79125	1.12348	0.133792		0.983355	101.589	-0.197545	0.963308		1.93549	15.2258	1.86755	0.508306		0.39492	-171.055	-0.390117	-0.0614073		1.28968	-134.566	-0.905006	-0.918831
2.09081	2.14726	2.08935	0.0783385		1.95138	125.643	-1.13714	1.58582		0.943244	134.169	-0.657231	0.676578		1.22373	8.35164	1.21075	0.177745		0.70626	-37.1926	0.562612	-0.426932
3.24573	-135.938	-2.33235	-2.25719		2.1865	-8.24632	2.1639	-0.313608		2.42673	110.739	-0.859322	2.26949		1.19893	76.6807	0.276208	1.16668		0.434136	-4.23136	0.432953	-0.0320323
1.97981	-68.8167	0.715411	-1.84603		0.187087	-123.802	-0.104081	-0.155463		2.66239	57.5211	1.42967	2.24597		0.592326	-166.718	-0.576481	-0.136087		1.91468	175.259	-1.90813	0.158244
1.81529	-108.37	-0.572094	-1.72279		0.116102	40.6013	0.0881511	0.0755581		3.00703	95.3688	-0.281357	2.99384		1.70406	-18.9555	1.61165	-0.553536		0.67335	177.599	-0.672759	0.0282048
2.10459	-136.421	-1.52463	-1.4508		0.578263	171.476	-0.571876	0.0857075		2.41376	-150.155	-2.09363	-1.20124		1.67229	27.9467	1.47727	0.783719		0.955432	24.0557	0.872452	0.389458
3.16113	-157.359	-2.91753	-1.21688		2.24187	22.1323	2.07668	0.844616		2.18476	-158.207	-2.02861	-0.811118		1.3373	-69.2777	0.47319	-1.25079		1.4763	22.9394	1.35955	0.575399
0.681806	4.05265	0.680101	0.0481853		2.85861	20.6913	2.67422	1.01004		1.22025	-149.678	-1.05332	-0.61606		0.368346	-46.2419	0.254754	-0.266044		1.53145	145.225	-1.25793	0.873458
1.19492	166.519	-1.162	0.27857		1.99886	27.7585	1.76883	0.930961		2.55975	-156.854	-2.35371	-1.00618		3.96709	163.4	-3.80174	1.13338		0.877838	84.2563	0.0878528	0.873431
2.76236	-113.043	-1.08125	-2.54195		3.33037	17.6764	3.17313	1.01123		0.591714	-115.382	-0.25364	-0.534596		2.13759	125.657	-1.24608	1.73683		1.62421	69.2166	0.576328	1.51852
2.0925	-77.8021	0.442124	-2.04526		1.61696	75.6869	0.399746	1.56677		1.16686	-161.944	-1.1094	-0.361671		2.52651	124.157	-1.41855	2.09068		1.67882	101.029	-0.321169	1.64781
1.13554	-71.7848	0.354956	-1.07864		2.75485	38.8128	2.14658	1.72668		1.49978	178.913	-1.49951	0.028446		3.41767	168.389	-3.34774	0.68784		1.97425	68.0739	0.737205	1.83144
2.05742	-137.404	-1.51457	-1.3925		3.40102	30.2081	2.93918	1.7112		1.18573	159.329	-1.1094	0.418563		1.50202	121.585	-0.786698	1.27953		2.65078	-15.5128	2.55422	-0.70896
1.92224	-138.946	-1.44955	-1.26246		2.32708	98.6005	-0.348003	2.30091		1.3005	148.545	-1.1094	0.678641		1.89761	120.496	-0.962996	1.63511		0.723317	-111.591	-0.266162	-0.672566
1.04323	-16.1494	1.00206	-0.290167		2.70505	63.3833	1.21192	2.41838		2.26037	155.758	-2.06105	0.928077		1.10037	-95.3234	-0.102089	-1.09562		2.97213	-2.47796	2.96935	-0.1285
0.0940752	-6.41504	0.0934861	-0.010511		0.919515	-39.8594	0.705838	-0.589323		1.37401	54.9429	0.78922	1.12473		1.35929	23.3775	1.24771	0.53935		0.49981	-58.2424	0.263064	-0.42498
1.08408	149.016	-0.929396	0.558084		0.508772	-140.185	-0.390794	-0.325775		2.90636	145.537	-2.39626	1.64465		1.26371	119.921	-0.630341	1.09528		0.706102	-24.7777	0.641099	-0.295926
0.814629	47.2544	0.552925	0.598243		1.2766	10.2833	1.2561	0.227894		3.10571	135.515	-2.21573	2.17623		0.63848	-93.6035	-0.0401298	-0.637217		0.847205	-157.065	-0.780234	-0.330138
1.76856	145.047	-1.44955	1.01322		1.16341	150.687	-1.01444	0.56959		2.21037	69.4098	0.777348	2.06917		1.31599	178.974	-1.31578	0.0235578		0.910287	3.29974	0.908778	0.0523956
1.44185	43.3207	1.04898	0.989227		1.1622	27.8844	1.02726	0.543546		3.09437	123.792	-1.72103	2.57161		0.896742	132.269	-0.603162	0.663582		1.36657	82.1259	0.187216	1.35369
1.48358	-116.869	-0.670514	-1.32342		1.72802	160.23	-1.62616	0.584498		3.19743	113.366	-1.2681	2.93521		1.22168	112.627	-0.47001	1.12765		1.895	125.838	-1.10952	1.53623
1.32031	-64.548	0.567408	-1.19217		1.33857	113.233	-0.528025	1.23002		3.01237	-31.6212	2.56513	-1.57939		1.34079	-27.6971	1.18716	-0.623195		2.82836	58.7632	1.46672	2.41834
0.933522	-91.2472	-0.0203186	-0.933301		1.99039	141.66	-1.56115	1.23469		0.784889	-93.2687	-0.0447537	-0.783612		0.840711	155.241	-0.763428	0.352097		2.55152	80.7375	0.410688	2.51825
1.72467	-172.735	-1.71083	-0.218086		2.8883	145.973	-2.39373	1.61626		2.91738	-11.104	2.86277	-0.561857		1.70737	33.5533	1.42287	0.943684		1.78258	-25.727	1.60588	-0.77379
0.636001	-1.59897	0.635753	-0.0177468		3.04002	138.486	-2.27636	2.01493		1.39981	-0.113121	1.39981	-0.00276369		2.43278	88.2165	0.0757167	2.4316		0.6751	-141.456	-0.528019	-0.420661
0.874179	39.9373	0.670275	0.561178		2.79644	125.557	-1.62616	2.27501		0.044881	24.3138	0.0409002	0.018479		1.43845	-30.724	1.23654	-0.734907		0.912383	-32.4747	0.769713	-0.489883
1.41802	106.526	-0.403352	1.35945		3.31025	131.837	-2.20797	2.4663		2.7992	10.7098	2.75044	0.520191		1.99009	-9.67163	1.9618	-0.334337		1.94507	-3.93779	1.94048	-0.133575
2.54015	136.676	-1.84792	1.74285		2.46051	70.2619	0.830967	2.31594		1.31702	127.331	-0.798672	1.04721		2.28212	-17.859	2.17216	-0.699871		0.443863	-7.6941	0.439867	-0.0594263
1.6203	78.7702	0.315543	1.58927		3.33412	-111.641	-1.22958	-3.09911		0.887326	68.4081	0.326531	0.825061		0.808018	-67.1982	0.313142	-0.744872		1.03215	29.4499	0.898781	0.507468
2.54046	-114.07	-1.03614	-2.31956		3.66823	-122.265	-1.95823	-3.10181		1.23216	75.235	0.314022	1.19147		0.0165179	-12.2488	0.0161418	-0.00350438		1.92973	29.7866	1.67477	0.958632
2.19565	-80.7659	0.352335	-2.1672		3.67365	-132.426	-2.47839	-2.7117		3.5926	-87.7526	0.140884	-3.58984		1.48347	-63.4909	0.662132	-1.3275		1.23287	49.6765	0.797795	0.939947
2.54885	-149.748	-2.20174	-1.28414		2.93897	-131.782	-1.95823	-2.19154		2.68614	-86.9367	0.143543	-2.6823		1.34259	-108.754	-0.431643	-1.27131		1.50756	-71.0093	0.490583	-1.42551
1.26953	-131.09	-0.83439	-0.956814		2.29119	-109.247	-0.755261	-2.16313		3.02202	-70.295	1.01896	-2.84505		2.22359	-25.942	1.99954	-0.972733		2.38408	-31.0046	2.04345	-1.22805
0.571679	-83.347	0.0662325	-0.56783		2.22466	-80.1004	0.382468	-2.19154		3.51652	-41.52	2.63291	-2.33104		1.44366	-167.9	-1.41159	-0.302614		1.21497	-13.7233	1.18029	-0.288232
1.08102	-31.14	0.925248	-0.559027		3.42768	-143.028	-2.73847	-2.0615		2.06297	-51.8324	1.27484	-1.62192		0.482639	-50.5889	0.306418	-0.372892		2.19267	-4.1811	2.18684	-0.159866
1.82796	-172.335	-1.81162	-0.243823		2.71267	-130.54	-1.76318	-2.0615		1.84304	-105.956	-0.506652	-1.77203		1.32579	-165.823	-1.28542	-0.324703		0.181082	127.338	-0.109829	0.143973
1.86787	-101.019	-0.357022	-1.83343		2.47706	-137.566	-1.8282	-1.67138		1.37736	-58.9212	0.711017	-1.17965		1.56758	74.4628	0.419899	1.5103		0.882536	3.88547	0.880507	0.0598026
1.87299	-109.237	-0.6171	-1.76841		1.87801	-136.981	-1.37306	-1.28127		1.49514	-33.8787	1.2413	-0.833448		1.01917	-173.855	-1.01331	-0.109101		3.02549	1.29763	3.02471	0.0685149
2.10604	-139.122	-1.59239	-1.3783		1.3731	-131.952	-0.917922	-1.02119		1.9191	-11.0318	1.88364	-0.367227		1.39115	-58.688	0.722977	-1.18852		3.74677	10.3706	3.68556	0.674474
1.25872	-97.3929	-0.161963	-1.24826		0.699874	-95.9598	-0.0726689	-0.696091		1.18934	-156.637	-1.09183	-0.471641		2.15966	-30.7864	1.85532	-1.1054		3.01998	16.5846	2.89434	0.861997
1.27956	-112.374	-0.487061	-1.18324		2.15615	-177.051	-2.15329	-0.110916		3.07152	-0.278583	3.07148	-0.0149343		2.26697	-20.266	2.12663	-0.785229		3.51232	17.2014	3.35522	1.0387
2.15222	-162.056	-2.04753	-0.663082		1.1268	-171.017	-1.11298	-0.175935		3.62284	-71.5115	1.14886	-3.43586		0.788798	-51.1901	0.49437	-0.614655		2.40137	32.8165	2.01813	1.30142
1.04468	-14.9199	1.00946	-0.268972		0.463181	177.634	-0.462786	0.0191234		4.5054	-50.5051	2.86547	-3.47673		2.48458	-6.07446	2.47063	-0.26292		1.47665	75.5362	0.36882	1.42985
1.82028	-11.4839	1.78383	-0.362403		2.07064	-60.8708	1.00795	-1.80875		2.87554	-57.0992	1.56196	-2.41434		0.692128	138.199	-0.515954	0.461338		0.983772	-55.7636	0.553479	-0.813307
2.30764	-179.68	-2.30761	-0.0128867		1.97877	-40.4485	1.50582	-1.28375		3.69287	-43.2892	2.68805	-2.53213		1.12716	64.3891	0.487224	1.01642		0.3224	-72.5419	0.0967223	-0.307549
1.40579	-5.83531	1.39851	-0.142926		2.34791	-29.119	2.05116	-1.14255		3.96357	-36.711	3.17744	-2.36934		2.46226	127.936	-1.51376	1.94197		1.22141	-12.2529	1.19358	-0.259215
2.05678	4.77958	2.04963	0.171377		1.43867	-32.5486	1.2127	-0.774026		1.47583	-58.6846	0.767061	-1.26083		2.85102	-39.6055	2.19658	-1.81752		1.38331	142.796	-1.10179	0.836418
0.184948	56.459	0.10219	0.154152		2.12982	-9.14219	2.10276	-0.338396		3.0916	-121.512	-1.61591	-2.63569		2.21074	-109.235	-0.72833	-2.08732		1.76888	-95.9005	-0.181845	-1.75951
2.01808	169.227	-1.98251	0.37723		0.141342	94.0496	-0.0099815	0.140989		2.64362	-84.1583	0.269067	-2.62989		1.92851	-56.2106	1.07253	-1.60276		1.56609	-133.035	-1.06878	-1.14471
1.2279	140.43	-0.946521	0.782207		0.937557	26.2303	0.841012	0.414382		3.52813	-140.471	-2.72124	-2.24557		0.436147	55.2743	0.24845	0.358464		0.0138015	-16.7826	0.0132136	-0.00398507
1.89424	-134.611	-1.3303	-1.3485		1.50727	-103.583	-0.353995	-1.46511		2.5522	-131.195	-1.68093	-1.92047		1.80341	101.621	-0.363261	1.76644		1.31467	-59.02	0.676713	-1.12713
1.22878	-93.5192	-0.075427	-1.22646		1.79954	-37.3924	1.42973	-1.09281		1.53726	-70.9065	0.502854	-1.45269		1.9369	-17.2755	1.84952	-0.575194		1.58017	-34.3638	1.30439	-0.89192
2.55046	-151.462	-2.24057	-1.21847		1.36175	-65.0442	0.574546	-1.23461		1.44323	-135.576	-1.03073	-1.0102		0.779949	154.625	-0.704699	0.334245		2.06402	-8.15249	2.04317	-0.292695
1.34255	-134.451	-0.940182	-0.958388		1.03077	-155.662	-0.939171	-0.424794		0.259859	26.0085	0.233543	0.11395		1.38627	35.7678	1.12481	0.810277		0.43189	-25.1333	0.391	-0.183435
1.07178	-129.387	-0.680104	-0.828349		0.3746	-28.3239	0.329752	-0.177731		1.87485	161.234	-1.77519	0.603134		0.741404	-4.19082	0.739422	-0.0541807		2.64023	25.8932	2.37517	1.15297
0.728564	-58.6612	0.378925	-0.622272		0.101974	29.8521	0.0884434	0.0507588		0.459343	108.627	-0.146718	0.435281		2.66216	-64.5899	1.14232	-2.40462		1.61922	72.2237	0.494352	1.54191
1.855	-164.259	-1.78544	-0.503251		2.44371	3.39699	2.43941	0.144799		3.58699	-90.9172	-0.057421	-3.58653		0.90543	-131.835	-0.603914	-0.674605		1.49539	-164.507	-1.44105	-0.399452
2.04715	177.706	-2.04551	0.0819246		1.22735	16.4155	1.17732	0.346851		3.71144	-101.022	-0.709561	-3.64298		0.826612	-20.2563	0.775488	-0.28619		0.966017	79.8574	0.170115	0.95092
2.00787	157.405	-1.85375	0.771454		0.970014	150.953	-0.848011	0.470961		2.54223	-74.1418	0.694687	-2.44548		0.732232	122.112	-0.389232	0.620211		1.19208	-146.491	-0.99395	-0.65811
1.53109	141.897	-1.20483	0.944794		2.54186	-135.912	-1.82575	-1.76853		2.53132	-119.065	-1.22972	-2.21255		0.398385	-28.8856	0.34882	-0.192445		0.934095	74.3983	0.251224	0.899678
1.11265	114.645	-0.463976	1.01129		1.8212	-127.574	-1.11053	-1.44343		3.27723	-113.935	-1.32955	-2.99542		2.44907	-11.3979	2.40077	-0.483991		1.63851	39.1753	1.2702	1.03504
1.85304	-129.108	-1.16886	-1.43789		1.20545	-66.483	0.481001	-1.10533		2.51851	-47.7837	1.69227	-1.86525		2.16397	5.78638	2.15294	0.218171		1.49934	108.421	-0.473794	1.42251
1.1626	-123.428	-0.640467	-0.970277		2.07607	-147.578	-1.75246	-1.11309		1.71141	-127.97	-1.05295	-1.34915		2.38554	-51.918	1.47137	-1.87773		2.08662	67.6223	0.794396	1.92948
1.80904	-149.516	-1.55898	-0.917734		1.06228	-119.64	-0.525358	-0.923277		1.69653	-63.5691	0.755154	-1.51919		1.21129	-50.5359	0.76989	-0.935143		2.26019	107.463	-0.678262	2.15602
0.596357	-53.3216	0.356218	-0.478279		1.6534	-170.493	-1.63069	-0.273082		0.381843	-83.1944	0.0452487	-0.379153		1.68797	-133.983	-1.17221	-1.21456		2.62935	80.4445	0.436479	2.59286
0.648746	-179.341	-0.648703	-0.00746125		0.135241	28.2854	0.119093	0.0640857		2.743	-94.2612	-0.203815	-2.73542		2.79983	-177.764	-2.7977	-0.109233		3.03036	70.2973	1.02165	2.85294
2.3703	170.71	-2.33921	0.382656		3.2909	-82.0844	0.453204	-3.25955		1.96021	-92.2226	-0.0760192	-1.95874		2.86227	155.408	-2.60264	1.19116		1.84572	-70.777	0.607696	-1.74281
0.962087	46.7086	0.659712	0.700279		3.26216	-73.4271	0.930482	-3.12665		2.74103	-141.96	-2.15879	-1.68905		2.039	122.983	-1.11003	1.71037		1.33343	-12.1339	1.30364	-0.280282
2.32154	148.124	-1.97144	1.22596		3.1107	-64.1575	1.35595	-2.79961		0.875499	-28.1222	0.772142	-0.41267		2.56935	-129.444	-1.63237	-1.98417		0.500377	-174	-0.497635	-0.0523062
1.16512	104.049	-0.282839	1.13027		2.96242	-102.659	-0.64921	-2.89041		1.57886	-175.329	-1.57362	-0.128578		1.18199	-131.735	-0.78684	-0.88203		1.10256	165.86	-1.06916	0.269352
1.85272	125.404	-1.07336	1.51012		3.38058	-54.7399	1.95157	-2.76037		0.601692	-173.936	-0.598326	-0.0635584		1.14815	146.238	-0.954517	0.638081		2.68849	-69.5811	0.937965	-2.51956
0.679222	-56.4727	0.375157	-0.566215		1.94268	-72.9822	0.568562	-1.85762		0.156366	-42.5974	0.115106	-0.105835		1.98036	38.4242	1.55148	1.23075		2.92131	-59.0716	1.50146	-2.50593
0.389502	-134.3	-0.272036	-0.278762		2.00751	-109.834	-0.681147	-1.88842		0.620791	-171.921	-0.614629	-0.0872484		1.445	-28.3213	1.27204	-0.685531		2.75581	-48.0079	1.84372	-2.04823
0.703505	2.42667	0.702874	0.0297869		2.32047	-44.3993	1.65793	-1.62353		1.73999	23.4701	1.59603	0.692986		1.10189	8.02573	1.0911	0.153844		1.9669	-34.8227	1.61467	-1.12318
1.83967	-95.1699	-0.165772	-1.83218		1.525	-80.6759	0.24708	-1.50485		4.16869	-58.0373	2.20677	-3.53668		0.475643	128.005	-0.292868	0.374787		0.883306	-85.3878	0.0710279	-0.880446
1.84171	-66.4273	0.736521	-1.68802		1.10126	-76.287	0.261063	-1.06987		3.56852	-71.8261	1.11303	-3.3905		4.1332	-62.9384	1.88039	-3.68069		0.758852	-139.748	-0.579167	-0.490329
1.23476	-142.344	-0.977554	-0.754329		0.84804	-133.541	-0.58419	-0.61473		4.30566	-45.1312	3.03758	-3.05153		4.09266	-36.8135	3.27654	-2.45237		1.41802	-15.19	1.36848	-0.371551
0.346918	-30.3008	0.299525	-0.175034		1.50764	-36.1371	1.21758	-0.889084		2.82455	-89.7313	0.0132487	-2.82452		2.72477	-34.6678	2.24103	-1.5499		1.86372	-166.809	-1.81454	-0.425309
1.13982	140.781	-0.883049	0.720697		0.595212	-132.025	-0.398466	-0.442157		3.3218	-57.587	1.78055	-2.80429		1.71278	-31.4138	1.46173	-0.892725		0.995115	1.18957	0.9949	0.020659
0.767622	41.487	0.575031	0.508511		0.40082	-26.464	0.35882	-0.17862		1.93847	-114.99	-0.818918	-1.757		2.2562	-21.2916	2.1022	-0.81926		0.524993	73.087	0.15273	0.502286
1.8802	-77.0699	0.420719	-1.83253		0.164152	-174.806	-0.163478	-0.0148616		3.57587	-23.8717	3.26997	-1.44712		0.999348	-81.8379	0.141882	-0.989225		2.48891	14.9781	2.40435	0.643257
2.98524	-30.6679	2.56772	-1.52266		1.59212	-0.476461	1.59206	-0.0132396		1.83443	-19.9732	1.7241	-0.626606		0.352781	-112.449	-0.134711	-0.326047		2.31167	157.756	-2.13964	0.875081
1.42221	-104.445	-0.354779	-1.37725		0.943189	2.85186	0.94202	0.0469272		0.566966	-40.0764	0.433835	-0.365018		2.1316	0.933001	2.13132	0.0347093		2.15338	-34.9991	1.76396	-1.2351
2.02352	-11.6122	1.98211	-0.40731		0.519004	20.316	0.486717	0.180197		0.912194	-30.0098	0.789905	-0.456232		1.50346	112.53	-0.576084	1.38871		0.516925	-2.64398	0.516375	-0.0238457
0.840222	108.182	-0.262186	0.798268		1.07047	151.834	-0.943712	0.505294		1.88194	-13.9084	1.82677	-0.452363		1.71464	-50.0398	1.10123	-1.31426		0.340719	9.50867	0.336037	0.0562856
2.07146	30.2722	1.789	1.04424		0.673651	119.437	-0.331079	0.586679		0.347154	-101.063	-0.0666118	-0.340703		0.788403	-57.5528	0.422996	-0.665323		2.54447	3.35779	2.5401	0.149032
1.72943	65.4472	0.718631	1.57305		1.14141	57.1253	0.619561	0.958624		1.82684	26.0683	1.641	0.802791		1.32866	-7.97144	1.31582	-0.184258		0.217891	64.6278	0.0933658	0.196874
1.11626	-121.824	-0.588616	-0.948459		1.39148	43.6477	1.00687	0.960431		1.41816	109.853	-0.481627	1.33387		0.180255	-11.4729	0.176653	-0.0358535		1.16271	17.564	1.1085	0.350872
1.33751	-167.115	-1.30383	-0.298264		1.72422	49.666	1.11599	1.31435		1.25951	90.3742	-0.00822517	1.25948		0.399467	-149.007	-0.342436	-0.205698		1.96613	20.8447	1.83744	0.69962
0.0270531	40.8471	0.0204645	0.0176939		1.46929	-70.3192	0.494827	-1.38346		2.21178	41.0397	1.66825	1.45221		2.39252	-0.235964	2.3925	-0.0098532		1.53665	-34.3074	1.26931	-0.866107
1.65889	143.792	-1.33853	0.979928		1.79187	-52.05	1.10195	-1.41297		1.95083	62.1575	0.911119	1.72499		0.395859	59.9672	0.198126	0.342711		2.64598	-10.4647	2.60197	-0.480589
2.54861	147.064	-2.13898	1.3857		3.49252	-87.5786	0.147557	-3.4894		3.12563	43.6182	2.26281	2.15622		2.66143	17.0969	2.54382	0.782429		0.963257	22.2974	0.891231	0.365473
1.5929	92.1996	-0.0611377	1.59173		3.48067	-60.6472	1.70617	-3.03382		1.35813	75.1076	0.349046	1.31251		0.488268	134.055	-0.339514	0.350907		2.01644	52.0788	1.23926	1.59068
2.14991	-66.9833	0.840611	-1.97875		3.37795	-51.5985	2.09827	-2.64722		1.80455	6.75145	1.79203	0.212147		0.0177299	3.71601	0.0176926	0.0011491		1.06502	-37.9673	0.839618	-0.655211
2.04909	-107.583	-0.618995	-1.95336		2.73213	-109.069	-0.892625	-2.5822		0.478055	56.8804	0.261204	0.400387		0.99696	55.4156	0.565894	0.820788		1.73106	-63.3724	0.775843	-1.54746
1.53772	-91.7186	-0.0461185	-1.53703		2.98784	-46.2158	2.06741	-2.15707		2.20044	118.704	-1.05685	1.93003		1.56437	70.5427	0.5211	1.47503		0.859301	-76.6618	0.19824	-0.836121
1.28446	-39.9381	0.984847	-0.824572		2.36014	-115.678	-1.02266	-2.12707		2.70312	52.5428	1.64395	2.14576		1.87491	98.9754	-0.292506	1.85196		0.7982	-15.4725	0.769272	-0.21294
2.68148	-75.2771	0.681481	-2.59343		1.81162	-112.647	-0.697566	-1.67193		3.34022	116.093	-1.46913	2.99979		1.37459	-96.8496	-0.163937	-1.36478		0.468993	-122.048	-0.248863	-0.39752
3.13246	-55.1396	1.79044	-2.57033		2.47537	-32.3582	2.09099	-1.32484		3.28245	78.6175	0.647815	3.21789		0.0353379	62.0764	0.0165485	0.0312236		2.08045	171.413	-2.05713	0.310624
2.85543	-27.8178	2.52544	-1.33252		1.91428	-140.533	-1.4778	-1.21679		1.91866	-160.078	-1.80384	-0.653774		1.53453	130.205	-0.990569	1.17199		0.620952	15.1045	0.599499	0.161808
1.77712	-18.5301	1.68499	-0.564774		1.29636	-49.8174	0.836447	-0.990411		0.429692	-4.91977	0.428109	-0.0368507		1.03104	-85.208	0.0861323	-1.02744		0.97802	157.267	-0.902041	0.377948
2.54178	-9.00037	2.51049	-0.397639		1.49498	-14.879	1.44486	-0.383879		1.41539	-177.222	-1.41373	-0.0685986		1.7386	-162.952	-1.6622	-0.509716		0.508054	78.8734	0.0980428	0.498504
1.98271	-3.22583	1.97957	-0.11157		0.240141	-27.2442	0.213501	-0.109933		1.67372	153.293	-1.49516	0.752204		0.82861	-41.4634	0.620943	-0.548658		0.860496	138.248	-0.641963	0.573007
0.788918	34.7187	0.648458	0.449326		1.15285	172.653	-1.14339	0.147415		1.68099	20.045	1.57916	0.576173		0.734992	166.252	-0.713933	0.174678		2.76966	-151.585	-2.43599	-1.31795
1.08808	103.302	-0.250349	1.05888		3.61319	-79.8464	0.636959	-3.5566		0.648419	75.0522	0.167253	0.626477		1.20396	-42.1802	0.89218	-0.808417		1.33515	-143.306	-1.07058	-0.797797
0.638587	-40.9708	0.482162	-0.418705		3.2722	-95.5095	-0.314164	-3.25708		1.3782	77.2014	0.305304	1.34395		0.471553	-169.851	-0.464174	-0.0830944		1.92151	-175.594	-1.91583	-0.147602
0.528669	-167.698	-0.51653	-0.112636		3.2722	-82.0047	0.455137	-3.24039		3.58993	21.6602	3.33644	1.32505		2.48239	-41.3826	1.86257	-1.64107		1.07163	170.586	-1.0572	0.175277
1.30662	-1.44382	1.3062	-0.0329225		3.36225	-70.5024	1.12221	-3.16945		3.65432	49.3858	2.37883	2.77403		1.57381	-137.861	-1.16701	-1.05592		1.90612	-20.0332	1.79079	-0.652967
2.07379	15.4873	1.99848	0.553754		4.27982	-47.9199	2.8682	-3.17652		1.30373	36.8909	1.0427	0.78262		0.21069	-89.0906	0.00334386	-0.210663		0.801475	-42.4367	0.591507	-0.540816
1.11326	123.077	-0.607583	0.932839		3.67139	-57.9071	1.95059	-3.11035		3.43865	-81.8158	0.489511	-3.40363		2.08403	154.577	-1.88222	0.894668		0.0900924	72.6014	0.0269392	0.0859704
1.03491	-58.7888	0.536283	-0.885118		2.84233	-109.724	-0.959276	-2.67556		3.449	-100.899	-0.652157	-3.38678		1.79557	138.004	-1.33445	1.20139		1.92713	2.0381	1.92591	0.0685367
0.450516	-115.907	-0.196832	-0.405243		2.66792	-81.8387	0.37874	-2.6409		3.86782	-59.2052	1.98019	-3.32248		1.23027	-5.66813	1.22425	-0.121509		2.238	150.481	-1.94749	1.10269
1.11082	10.2081	1.09324	0.196864		2.91332	-57.6132	1.56047	-2.46016		3.34689	-115.736	-1.45332	-3.01488		0.116757	117.027	-0.053055	0.104007		1.1924	96.384	-0.132584	1.18501
2.16883	11.4311	2.1258	0.429837		3.39577	-44.133	2.43723	-2.36456		2.36374	-63.348	1.0603	-2.11258		1.73717	106.931	-0.505893	1.66188		1.61314	-94.2128	-0.118502	-1.60879
0.921811	30.1484	0.797115	0.462971		2.32406	-77.0669	0.520156	-2.2651		2.09074	152.796	-1.85947	0.95582		2.71787	111.954	-1.01611	2.52078		1.84423	-50.3886	1.17584	-1.42077
1.59747	35.5513	1.29969	0.928819		2.55565	-120.586	-1.30039	-2.20008		1.65339	143.01	-1.32063	0.9948		2.56101	69.6063	0.89243	2.40049		1.37118	-67.6084	0.52233	-1.2678
1.46267	51.359	0.913349	1.14246		2.80081	-40.3031	2.13599	-1.81165		1.46043	45.6371	1.02113	1.0441		1.69177	-85.3363	0.137552	-1.68617		2.27049	-51.7081	1.40695	-1.78202
1.67041	90.1506	-0.00439194	1.6704		2.28179	-55.2568	1.30039	-1.87498		1.12219	97.886	-0.153966	1.11157		0.676883	-68.4196	0.248962	-0.629435		0.918585	-132.519	-0.620808	-0.677049
1.85014	59.6022	0.936173	1.59581		1.50747	-80.0653	0.260078	-1.48486		2.14941	47.6258	1.44864	1.58789		1.70364	168.925	-1.67191	0.327263		0.351895	140.461	-0.271379	0.224018
1.44853	-155.624	-1.3194	-0.597851		1.95977	-32.9265	1.64497	-1.06526		2.42907	69.4812	0.851422	2.27496		1.70188	-134.053	-1.18336	-1.22313		2.25963	13.4799	2.19738	0.526728
0.491713	-107.898	-0.151112	-0.467918		1.21782	-57.7307	0.650195	-1.02973		0.460432	-31.5333	0.392443	-0.240803		0.258872	20.2211	0.242916	0.0894775		0.527507	89.8772	0.00113077	0.527506
0.394614	33.6901	0.328339	0.218892		1.4252	-33.9965	1.18159	-0.796889		3.65083	6.73883	3.62561	0.428402		2.74461	166.11	-2.66436	0.658861		0.880977	49.5853	0.571151	0.670751
2.50928	172.848	-2.48975	0.312422		1.18791	-44.6649	0.844876	-0.835052		4.15185	9.9813	4.089	0.719626		3.31028	-82.2037	0.449046	-3.27968		2.53415	25.475	2.28777	1.08999
0.924268	128.208	-0.57168	0.72626		1.02535	-175.785	-1.02258	-0.0753635		0.599184	63.1266	0.270844	0.534477		3.41473	-68.7847	1.2357	-3.18331		1.62252	-64.0634	0.709653	-1.4591
0.66138	67.0039	0.25838	0.608821		1.28382	174.669	-1.27827	0.119285		2.29354	30.0568	1.98512	1.14874		2.94001	-101.936	-0.608062	-2.87644		2.54336	-50.8757	1.60487	-1.97308
3.47115	163.9	-3.33501	0.962617		0.674307	68.4891	0.247253	0.62734		2.1482	55.3887	1.22019	1.76802		3.55715	-121.768	-1.87274	-3.02426		0.912393	-116.595	-0.408458	-0.815857
3.6178	153.747	-3.24462	1.6003		1.50321	127.039	-0.905484	1.1999		3.70004	34.4528	3.05102	2.09321		2.46414	-80.5149	0.406066	-2.43045		0.136217	148.684	-0.116372	0.0707999
1.55777	76.4373	0.365312	1.51433		3.14651	159.782	-2.95263	1.08743		3.04885	48.8446	2.00646	2.29556		2.79805	-67.5005	1.07075	-2.58507		2.42588	8.543	2.39896	0.360368
3.31481	135.387	-2.35972	2.32803		3.02394	158.937	-2.82189	1.08681		5.41272	26.8288	4.83009	2.4429		3.53494	-34.8807	2.89986	-2.02152		0.343383	59.2486	0.175576	0.295101
2.56725	95.8624	-0.262219	2.55382		2.48177	155.48	-2.25795	1.02997		4.13696	51.6867	2.56475	3.24599		2.54958	-143.211	-2.04183	-1.52685		0.885858	36.5358	0.711774	0.527373
4.7102	135.254	-3.34532	3.31584		3.33625	152.464	-2.95831	1.54238		2.37097	-94.606	-0.190395	-2.36331		0.357463	-84.7422	0.0327569	-0.355959		2.64158	20.2704	2.47799	0.915178
4.28103	118.773	-2.06064	3.75246		2.77833	149.261	-2.38799	1.42009		2.47991	-73.6983	0.696098	-2.38021		1.38059	-140.581	-1.06654	-0.876655		0.722908	-69.0151	0.258889	-0.674961
3.96766	107.603	-1.19992	3.78187		1.58213	112.196	-0.597685	1.46489		1.71537	-71.9146	0.53251	-1.63062		2.18798	-75.6466	0.542406	-2.11969		0.935257	-27.2921	0.831144	-0.428841
2.92918	-106.629	-0.838251	-2.80667		2.69652	131.05	-1.77083	2.03356		2.48255	-123.38	-1.36587	-2.07303		2.44836	-35.2922	1.99839	-1.41453		1.58739	4.45095	1.5826	0.12319
2.26442	-53.4139	1.34966	-1.81825		2.17964	101.577	-0.437404	2.1353		1.70536	-45.3414	1.19867	-1.21304		0.503251	-42.6338	0.370241	-0.340857		0.145148	67.0922	0.0564987	0.133701
2.78733	-40.1121	2.13171	-1.79583		2.6293	113.3	-1.03999	2.41488		1.59825	-121.932	-0.845339	-1.3564		1.37186	-16.6953	1.31403	-0.394109		2.5107	38.322	1.96974	1.55684
2.38995	-125.504	-1.38798	-1.9456		1.58162	-130.515	-1.02749	-1.2024		1.94161	-147.374	-1.63524	-1.04681		2.05167	-67.3857	0.78892	-1.89393		2.02395	87.716	0.0806617	2.02234
2.5656	-26.9832	2.28631	-1.16409		1.36952	-153.212	-1.22255	-0.617227		1.05611	-90.5026	-0.00926374	-1.05607		1.41052	-1.33124	1.41014	-0.0327698		1.62171	-117.911	-0.759111	-1.43307
1.92372	-22.5471	1.77668	-0.737638		3.45174	-174.061	-3.43321	-0.357149		0.266758	-57.742	0.142377	-0.225585		0.721807	138.965	-0.544465	0.473881		1.63074	-42.0526	1.21087	-1.09229
0.351481	-55.8182	0.197469	-0.290766		2.72747	-175.224	-2.718	-0.22711		0.534714	-172.313	-0.529909	-0.0715215		2.73071	-112.114	-1.02799	-2.52983		1.89662	-144.255	-1.53935	-1.10797
0.761506	-129.397	-0.483322	-0.588465		1.71547	165.846	-1.66339	0.41948		1.41106	172.485	-1.39894	0.184546		3.12602	-121.628	-1.63928	-2.66172		1.00122	-139.304	-0.759111	-0.652835
0.489095	165.665	-0.473866	0.121099		2.49407	168.768	-2.4463	0.485796		0.643337	150.632	-0.56066	0.315504		2.42102	-140.312	-1.86305	-1.54608		0.909732	167.789	-0.88915	0.192418
1.34078	9.05169	1.32409	0.210939		1.11119	146.381	-0.925325	0.615234		1.00855	29.9287	0.874056	0.503188		1.73706	-158.229	-1.61317	-0.644263		0.765492	130.585	-0.498013	0.581344
2.83556	-88.4425	0.0770705	-2.83451		3.40338	171.754	-3.36819	0.488104		2.19578	159.454	-2.05611	0.770641		0.282617	109.576	-0.0946939	0.266281		1.9522	17.2363	1.86453	0.578461
2.97764	-119.336	-1.45885	-2.59578		0.993589	102.973	-0.223056	0.968228		2.7748	158.195	-2.57626	1.03072		0.310255	-30.1187	0.268367	-0.155684		1.60648	60.1473	0.79966	1.39331
2.65187	-110.999	-0.950316	-2.47574		1.63207	110.53	-0.572355	1.52842		1.57391	45.7316	1.09862	1.12704		2.10247	0.898629	2.10221	0.0329739		0.87644	-31.4544	0.747652	-0.457344
1.73884	-91.5768	-0.0478468	-1.73818		2.49819	118.586	-1.19532	2.19367		1.55107	84.5365	0.14768	1.54402		1.10572	-20.4548	1.036	-0.386413		1.23309	-17.2305	1.17775	-0.365261
2.59754	-150.628	-2.26363	-1.27405		1.08181	-104.948	-0.279036	-1.0452		2.69255	128.183	-1.66446	2.11645		0.131131	-44.2566	0.0939188	-0.0915128		0.250861	17.9691	0.238625	0.0773919
1.09978	-36.237	0.887058	-0.650109		0.674706	-59.003	0.34747	-0.578354		2.21312	62.1238	1.03478	1.95631		1.12474	148.227	-0.956182	0.592238		2.30425	7.7264	2.28333	0.309789
1.63028	-171.757	-1.61344	-0.233734		1.19146	-141.648	-0.934354	-0.739296		2.08264	83.948	0.219574	2.07103		1.67493	29.4201	1.45893	0.822741		1.07622	161.088	-1.01812	0.348813
2.85493	-52.0386	1.75616	-2.2509		1.41432	159.467	-1.32447	0.496075		3.25822	-62.3025	1.51443	-2.88487		1.42393	118.224	-0.673403	1.25464		0.480466	28.3441	0.422864	0.228109
2.36642	-58.3909	1.24029	-2.01535		0.609604	34.3442	0.503328	0.343916		2.33166	-92.329	-0.0947537	-2.32973		2.4091	-81.2838	0.365078	-2.38128		0.567861	76.2175	0.135286	0.551511
3.70275	-35.4102	3.01783	-2.14548		0.74727	112.35	-0.284159	0.691133		1.51968	-105.282	-0.400534	-1.46594		1.47723	-136.076	-1.06399	-1.02476		1.85826	151.722	-1.6365	0.880343
3.89816	-25.6433	3.51421	-1.687		1.44753	103.35	-0.33424	1.40842		0.641261	-56.346	0.355372	-0.533785		2.19677	-173.534	-2.1828	-0.247384		1.68781	134.422	-1.18136	1.20544
2.58881	-42.0821	1.92138	-1.73501		2.3658	-137.665	-1.74884	-1.59328		1.69231	-25.1242	1.5322	-0.718524		4.26413	178.956	-4.26342	0.0777138		2.28819	37.8801	1.80606	1.40498
1.77149	-56.4037	0.980231	-1.47558		1.61222	-100.869	-0.304011	-1.58329		3.16715	-9.48694	3.12383	-0.522019		4.12345	163.537	-3.9544	1.16858		1.36909	-59.0301	0.704519	-1.17391
1.0835	-91.0223	-0.0193316	-1.08332		2.04374	-122.518	-1.09865	-1.72332		0.464258	106.877	-0.134782	0.444263		1.92652	138.18	-1.43573	1.28458		0.948031	-90.9824	-0.0162549	-0.947892
3.73549	-17.26	3.56728	-1.10835		2.68384	-153.365	-2.39904	-1.20316		0.563429	68.2185	0.20907	0.523204		2.5758	138.345	-1.92453	1.71199		1.16611	-25.7945	1.04992	-0.507425
3.47106	-6.02143	3.45191	-0.364116		0.878093	-82.2764	0.11801	-0.870127		2.04613	134.629	-1.43742	1.45618		1.47233	-134.18	-1.02609	-1.05589		1.41126	168.246	-1.38166	0.287479
0.882193	-168.9	-0.865688	-0.169847		0.4825	-126.975	-0.290208	-0.385468		2.49868	74.365	0.673417	2.40623		0.021094	-1.66975	0.021085	-0.000614645		2.53327	161.558	-2.40318	0.801366
0.327926	-148.806	-0.280513	-0.169847		2.00918	179.082	-2.00892	0.0322059		2.66482	102.638	-0.583055	2.60025		1.3063	-125.601	-0.760445	-1.06214		1.34126	40.0164	1.02722	0.862441
2.19572	3.6254	2.19133	0.138842		2.26923	179.187	-2.269	0.0322059		2.64505	86.8069	0.147335	2.64095		1.00482	-35.9456	0.813477	-0.589847		1.49298	119.763	-0.741144	1.29603
0.699629	149.953	-0.60561	0.350309		2.35149	160.3	-2.21385	0.792695		3.74292	117.001	-1.69928	3.33495		1.18098	0.934835	1.18082	0.0192679		0.0918467	97.2532	-0.011596	0.0911117
1.00071	91.0355	-0.018085	1.00055		0.386831	117.799	-0.180405	0.342188		3.57027	72.6893	1.06234	3.40856		1.32878	2.19746	1.32781	0.0509502		2.04695	25.6948	1.84454	0.887513
1.42433	-48.3887	0.945858	-1.06492		0.490821	96.8259	-0.0583353	0.487342		3.4991	-66.9952	1.36747	-3.22082		1.40425	-91.2717	-0.0311654	-1.4039		1.09887	46.2638	0.759689	0.793964
0.737936	-93.0539	-0.0393141	-0.736888		0.680114	52.3305	0.415622	0.538343		4.97496	-37.3448	3.95509	-3.01786		0.853688	-160.023	-0.80232	-0.291659		1.31595	122.117	-0.699632	1.11456
0.413663	-80.4945	0.0683134	-0.407983		1.18485	142.345	-0.938047	0.723838		2.63417	-83.3489	0.305098	-2.61644		0.51251	-44.2391	0.36718	-0.357554		3.35221	-63.6568	1.48753	-3.00409
0.501242	-55.2393	0.285783	-0.41179		0.812419	95.8567	-0.0829005	0.808178		2.81219	-54.9656	1.61439	-2.30264		1.50804	-78.9368	0.289381	-1.48001		2.43209	-86.4101	0.152283	-2.42732
0.504208	-17.7788	0.480128	-0.153956		2.30863	150.48	-2.00892	1.13754		2.98521	-34.2265	2.46823	-1.67908		2.76792	-164.781	-2.67084	-0.726612		2.96611	-36.4365	2.38628	-1.76167
0.949835	177.386	-0.948846	0.0433125		2.95334	-55.1657	1.68696	-2.42412		0.304417	-76.3344	0.0719198	-0.295799		0.0538592	-38.8058	0.0419711	-0.0337526		1.9272	-62.9663	0.87594	-1.71664
0.669894	128.893	-0.420602	0.521394		4.04077	-29.9444	3.50137	-2.01699		1.5543	-171.177	-1.53591	-0.238405		1.76139	178.255	-1.76057	0.0536224		1.14292	-53.3197	0.682725	-0.916603
0.682086	19.4289	0.643245	0.226887		2.12329	-64.4178	0.916849	-1.91514		0.890945	157.094	-0.820691	0.346771		0.636978	-95.7843	-0.0641965	-0.633734		1.31171	-105.903	-0.35943	-1.2615
0.405501	80.8538	0.0644564	0.400346		2.70697	-42.3384	2.00094	-1.82316		0.670288	62.5062	0.30944	0.594586		1.46254	-167.817	-1.42961	-0.308637		1.24112	-131.02	-0.814567	-0.936402
0.871755	70.9971	0.283857	0.824246		2.41427	-53.9509	1.42075	-1.95197		0.934434	46.8421	0.639164	0.681643		2.01485	174.007	-2.00384	0.21037		0.422036	-148.392	-0.35943	-0.221188
1.41714	64.4648	0.610881	1.27872		3.97566	-26.2262	3.56639	-1.75691		1.58233	86.887	0.0859297	1.58		1.54837	136.193	-1.11743	1.07182		0.475394	-14.229	0.46081	-0.116851
1.60875	119.078	-0.781851	1.40599		1.58148	-67.7016	0.600063	-1.46322		3.01616	-88.4286	0.0827123	-3.01502		0.757442	60.9909	0.367321	0.662415		3.99112	-54.5704	2.31366	-3.25208
2.24895	-84.5262	0.21453	-2.2387		3.01746	-26.665	2.69654	-1.35416		3.17678	-58.4069	1.66426	-2.70595		0.988023	119.266	-0.483008	0.861913		3.77526	-30.9989	3.23606	-1.94434
2.34357	-63.2873	1.05347	-2.09344		2.81391	-15.0041	2.71798	-0.72849		2.77947	-104.495	-0.695709	-2.69099		3.62324	158.715	-3.37609	1.31525		2.0995	-119.605	-1.03718	-1.82541
2.08402	-103.513	-0.486956	-2.02633		0.637769	-51.9234	0.393321	-0.502043		3.61772	-44.36	2.58653	-2.52938		2.31122	132.516	-1.56193	1.70356		1.62929	-98.9563	-0.25365	-1.60942
1.49693	-126.177	-0.883619	-1.20831		0.586639	-90.9458	-0.00968376	-0.586559		2.8439	-119.479	-1.39949	-2.47572		0.246967	-98.8178	-0.0378584	-0.244048		2.07906	-38.7105	1.62232	-1.30022
1.57324	-69.0547	0.562395	-1.46928		1.45258	-23.6797	1.33028	-0.583392		3.00877	-32.9214	2.52561	-1.63523		1.51547	132.275	-1.01943	1.12134		3.31547	-20.1271	3.113	-1.14087
1.24108	-34.354	1.0246	-0.70035		2.42781	-8.59209	2.40056	-0.362712		1.73833	-76.572	0.40368	-1.69081		0.916185	-55.5266	0.518582	-0.755293		1.57159	-46.6744	1.07834	-1.14328
1.68111	-155.836	-1.53381	-0.688157		0.857722	9.4734	0.846024	0.141172		3.35263	-28.224	2.95402	-1.58552		2.43019	172.053	-2.40685	0.335987		1.11192	-93.1908	-0.0618902	-1.1102
0.689092	172.383	-0.683012	0.0913354		2.27426	8.97593	2.24641	0.354829		0.583331	-45.3413	0.410013	-0.414927		1.3904	150.956	-1.21556	0.675017		2.63771	-18.9262	2.49511	-0.85554
0.684638	-6.73601	0.679912	-0.0803046		1.84815	-107.532	-0.55673	-1.7623		2.18241	-89.4967	0.0191724	-2.18232		1.33669	24.9826	1.21162	0.564539		0.763443	-31.1562	0.653324	-0.394985
0.427129	64.9045	0.181157	0.386809		1.82744	-72.7087	0.543171	-1.74485		2.68088	-24.2063	2.44516	-1.09922		1.18643	-53.7099	0.702219	-0.956302		2.12931	-26.3364	1.90829	-0.944647
2.85131	-69.5238	0.997442	-2.67116		1.5675	-86.5871	0.0933151	-1.56472		1.14217	-89.0382	0.0191724	-1.14201		0.360966	-173.367	-0.35855	-0.0416973		0.818977	-22.1933	0.758303	-0.309355
2.72686	-72.8873	0.802384	-2.60614		1.96291	-130.255	-1.26841	-1.49805		2.03732	0.707576	2.03716	0.0251593		1.20179	7.50766	1.19149	0.157024		2.06901	13.6899	2.01023	0.489666
2.39412	-76.9844	0.539196	-2.33261		1.26662	-40.6312	0.961259	-0.824806		0.0888343	62.8897	0.0404822	0.0790742		0.444591	44.6144	0.316482	0.312251		1.07434	66.8293	0.422721	0.987676
2.73975	-56.3638	1.5176	-2.28104		0.793204	-149.976	-0.686769	-0.39689		1.45834	27.1067	1.29815	0.664491		3.80839	-141.004	-2.95985	-2.39648		1.49754	73.8169	0.417377	1.4382
2.02284	-85.9529	0.142764	-2.0178		1.59706	177.911	-1.59599	0.0582085		2.61963	-65.072	1.10412	-2.37559		2.93388	-154.908	-2.65701	-1.24416		2.22583	43.3251	1.61923	1.52723
1.86261	-101.394	-0.367968	-1.8259		0.0937106	28.0383	0.0827121	0.0440498		1.44774	-84.0524	0.150013	-1.43994		3.54176	-166.046	-3.43725	-0.85404		2.33494	102.621	-0.510199	2.27852
2.92593	-40.2606	2.23281	-1.89092		0.6985	127.387	-0.42413	0.554992		0.747738	-158.237	-0.694444	-0.277236		0.827656	-134.14	-0.576389	-0.593962		3.70923	-153.311	-3.31405	-1.66598
2.6407	-43.7447	1.90772	-1.8259		2.44648	-59.9924	1.22352	-2.11855		1.531	-7.9676	1.51622	-0.212216		3.93744	-171.324	-3.89238	-0.593962		1.82436	-157.754	-1.68856	-0.690686
1.64525	-82.4136	0.217208	-1.63085		1.99578	-75.8572	0.487646	-1.93529		1.58233	28.6415	1.38871	0.758457		2.95375	-170.964	-2.91709	-0.463923		2.73091	-177.786	-2.72887	-0.105511
3.11077	-29.6302	2.70399	-1.53797		1.5393	-71.7234	0.482734	-1.46165		3.7272	-83.1274	0.446004	-3.70042		0.269008	-74.6499	0.071211	-0.259411		1.43863	-173.192	-1.42848	-0.17053
1.68339	-46.0779	1.16773	-1.21252		1.94402	-46.714	1.3329	-1.41513		3.26142	-92.4176	-0.137578	-3.25851		2.36579	-170.293	-2.33192	-0.398903		4.16027	176.978	-4.15448	0.219332
2.09373	-39.7591	1.60953	-1.33907		1.57587	-53.7351	0.932155	-1.27061		3.23831	-115.621	-1.4003	-2.9199		4.02282	179.199	-4.02242	0.0562331		2.77169	149.962	-2.39944	1.38743
1.33294	-118.11	-0.628046	-1.17571		1.25605	-39.8357	0.964502	-0.804612		2.99931	-91.3862	-0.072558	-2.99844		2.09584	167.842	-2.04884	0.441395		1.87285	-26.8218	1.67136	-0.845064
1.42342	-55.6877	0.802384	-1.17571		2.01277	-29.268	1.75582	-0.984032		3.44369	-127.328	-2.08816	-2.73836		2.71881	167.76	-2.65701	0.576389		0.0195681	1.90915	0.0195573	0.000651909
2.8484	-21.2571	2.6546	-1.0327		1.05188	-68.1551	0.3914	-0.976348		3.24984	-128.502	-2.02314	-2.5433		2.24205	145.464	-1.84694	1.27107		2.02949	6.74165	2.01546	0.238247
2.81559	-13.0959	2.74237	-0.637962		1.54766	-25.4116	1.39792	-0.664128		2.13881	-100.163	-0.377406	-2.10524		1.83261	-85.5171	0.14324	-1.82701		0.425466	104.417	-0.10593	0.412068
0.749165	-22.384	0.692718	-0.285291		0.69772	-10.0453	0.687024	-0.121701		2.81856	-137.805	-2.08816	-1.8931		1.47347	-98.9077	-0.228157	-1.4557		0.800768	25.6663	0.721758	0.346836
2.00022	-5.12912	1.99221	-0.178821		1.11945	-57.0332	0.60915	-0.939199		0.963119	-57.8152	0.513007	-0.815121		2.83522	-155.355	-2.57696	-1.18226		2.08136	26.1563	1.86822	0.917509
2.37134	-4.84823	2.36285	-0.200417		0.718969	155.763	-0.655598	0.29514		1.57524	-52.095	0.967754	-1.24291		2.14352	-158.312	-1.99178	-0.792146		0.979551	65.7514	0.402298	0.893127
0.546853	-6.61009	0.543218	-0.0629494		1.36238	38.7035	1.06319	0.851881		0.61008	-130.678	-0.397656	-0.462675		0.759357	-64.3654	0.328521	-0.684614		2.54268	-69.436	0.893125	-2.38066
0.35411	73.5308	0.10039	0.339582		1.16178	57.4348	0.625341	0.979127		1.51057	-162.164	-1.43797	-0.462675		0.33304	-154.772	-0.301274	-0.141951		1.6919	-90.2857	-0.0084378	-1.69188
1.39676	-122.021	-0.740611	-1.18425		0.983355	101.589	-0.197545	0.963308		0.323762	-27.9038	0.28612	-0.151517		1.26031	4.44594	1.25652	0.0976975		2.87778	-32.1475	2.43656	-1.53127
1.75198	-139.651	-1.33521	-1.1343		1.95138	125.643	-1.13714	1.58582		3.24143	-83.7994	0.350105	-3.22247		1.70116	153.435	-1.52157	0.760784		2.67764	-31.4541	2.28419	-1.39723
2.14398	-157.825	-1.98541	-0.8092		3.00331	-145.86	-2.48575	-1.68551		3.21875	-98.7355	-0.48884	-3.18141		1.93815	23.7733	1.77369	0.781304		4.10701	-19.5236	3.87087	-1.37254
0.549423	-44.9159	0.389071	-0.38793		2.15606	-141.422	-1.68553	-1.34447		2.75748	-71.3419	0.882176	-2.61256		1.17013	121.727	-0.615333	0.995274		2.66495	-23.0184	2.45277	-1.04207
1.50742	-166.415	-1.46525	-0.354064		2.79064	-163.871	-2.6808	-0.775233		1.88493	-91.117	-0.0367452	-1.88457		1.75941	41.5412	1.31688	1.16677		2.39711	-1.44995	2.39634	-0.0606558
1.99234	169.69	-1.96018	0.356561		1.64248	-156.87	-1.51045	-0.645194		2.18815	-37.4401	1.73736	-1.33024		2.97012	-54.1118	1.7411	-2.40628		0.425621	120.388	-0.215303	0.367148
1.59387	7.11797	1.58159	0.197501		2.39833	-169.182	-2.35571	-0.450135		1.59797	-15.4361	1.54033	-0.425321		2.31033	-124.103	-1.29535	-1.91303		2.74131	8.40047	2.7119	0.400481
0.919748	137.796	-0.681307	0.617865		2.69098	154.102	-2.42073	1.17535		0.796491	61.2106	0.383583	0.698041		1.21894	-111.669	-0.450092	-1.1328		1.7018	13.7616	1.65294	0.404826
0.423849	33.2735	0.354364	0.232539		2.98425	-114.871	-1.2551	-2.70748		0.702681	-108.281	-0.220419	-0.667215		2.23812	-28.5079	1.96675	-1.06821		1.70622	-49.3803	1.11081	-1.2951
1.78039	145.386	-1.46525	1.01135		3.47426	-133.056	-2.37191	-2.53861		1.09236	-170.423	-1.07713	-0.181741		2.70243	-135.253	-1.91933	-1.90245		0.858298	-91.102	-0.0165075	-0.858139
1.34602	71.6879	0.422908	1.27785		2.21705	-92.5213	-0.0975293	-2.2149		1.66456	163.655	-1.59729	0.468454		3.06306	-151.803	-2.69956	-1.44731		1.13309	-144.966	-0.927789	-0.65046
2.95632	-159.381	-2.76696	-1.04106		1.76726	-84.7226	0.162549	-1.75977		0.581688	102.9	-0.129863	0.567006		1.93597	-142.175	-1.52921	-1.18723		0.189166	-11.9833	0.185043	-0.0392758
2.02548	-168.867	-1.98736	-0.391102		2.00577	-119.799	-0.996797	-1.74055		0.911841	46.8683	0.623405	0.665447		3.96693	-163.567	-3.80489	-1.12221		1.0228	3.04359	1.02135	0.054306
3.2113	165.031	-3.10233	0.82946		2.44772	-156.41	-2.24317	-0.979533		2.07432	147.491	-1.7493	1.1148		3.27363	-157.51	-3.02466	-1.25225		0.539066	22.3257	0.498657	0.204776
2.25926	165.014	-2.18242	0.58419		3.15403	178.896	-3.15345	0.0607791		1.89232	110.338	-0.657677	1.77436		0.93288	-56.3813	0.516501	-0.776847		1.81892	-73.2001	0.525721	-1.74129
1.29238	146.451	-1.07709	0.714229		2.13735	171.366	-2.11313	0.320857		1.46028	-139.971	-1.11816	-0.939215		0.636134	-166.647	-0.618936	-0.146919		1.52096	-74.3279	0.41086	-1.46442
1.50615	-136.944	-1.10052	-1.02827		1.79819	171.857	-1.78006	0.254696		3.67627	-178.265	-3.67459	-0.111321		1.03135	142.116	-0.813994	0.633315		3.54468	-22.5009	3.27483	-1.35654
0.600634	-122.225	-0.320281	-0.508115		3.01489	167.683	-2.94549	0.643139		2.11877	163.579	-2.03235	0.598957		0.634086	87.1743	0.0312594	0.633315		1.25469	-100.62	-0.231241	-1.23319
2.58629	162.618	-2.46819	0.77263		1.26339	138.265	-0.942783	0.841013		1.75481	155.277	-1.59396	0.733932		3.25477	159.528	-3.0492	1.13836		2.13274	-32.7883	1.79295	-1.15496
0.594476	51.5952	0.369297	0.465856		2.9395	154.342	-2.64966	1.27278		0.78974	65.5881	0.326394	0.719135		2.23926	148.995	-1.91933	1.15347		1.62933	-28.0658	1.43773	-0.766575
1.54276	144.553	-1.25682	0.894722		1.55065	126.031	-0.912131	1.25401		3.96544	160.57	-3.73961	1.31911		2.28061	-93.5959	-0.143038	-2.27612		0.0289191	-47.6245	0.0194911	-0.0213638
2.12652	-80.1317	0.364453	-2.09506		1.28202	99.0659	-0.202008	1.266		2.96023	155.598	-2.69578	1.223		2.16896	-60.7733	1.05903	-1.89284		2.24038	-1.4037	2.23971	-0.054882
2.34307	-49.0611	1.5353	-1.76997		3.01054	-107.571	-0.908822	-2.87009		2.23835	145.925	-1.85404	1.25409		2.63344	-138.336	-1.96733	-1.7506		1.75022	8.0711	1.73288	0.245733
1.55146	-94.9743	-0.134525	-1.54562		2.71721	-73.6992	0.762667	-2.60798		1.87874	138.124	-1.3989	1.25409		1.46259	-111.536	-0.536903	-1.36048		1.50805	-50.7237	0.95469	-1.16739
1.41284	-112.898	-0.549721	-1.30151		2.36355	-107.821	-0.723342	-2.25014		1.2578	79.0993	0.23786	1.2351		1.9423	-138.166	-1.44718	-1.29546		1.83928	-32.5958	1.54958	-0.990834
0.74327	-90.6115	-0.00793287	-0.743228		2.56732	-127.616	-1.56699	-2.03364		2.97846	142.235	-2.35457	1.82406		1.41042	-41.9087	1.04965	-0.942087		0.595353	-20.6404	0.557138	-0.209863
1.58023	-9.16109	1.56007	-0.251589		2.4363	-120.393	-1.23259	-2.1015		3.59245	135.161	-2.54738	2.53309		0.949022	-147.118	-0.796982	-0.51523		0.633921	-145.518	-0.522544	-0.358893
1.03108	-4.53276	1.02786	-0.0814856		2.04042	-16.2901	1.95851	-0.57234		2.43918	102.538	-0.529532	2.38101		1.86498	-170.115	-1.83729	-0.320172		0.116992	35.866	0.0948091	0.0685446
1.57011	179.177	-1.56994	0.0225445		0.693539	-96.0542	-0.0731469	-0.689671		2.44191	81.8477	0.346276	2.41724		1.31404	-141.22	-1.02437	-0.823021		2.01564	-8.72587	1.99231	-0.305787
0.495949	21.8243	0.460403	0.184374		0.448749	-3.91353	0.447702	-0.0306275		3.0239	94.1635	-0.219546	3.01592		3.75468	-169.364	-3.69017	-0.692982		1.17344	131.997	-0.78514	0.872075
1.22288	28.7568	1.07206	0.588317		1.74043	-115.301	-0.743823	-1.57347		3.94997	123.429	-2.17603	3.29653		0.642248	-109.407	-0.213408	-0.605756		0.758095	90.1359	-0.00179839	0.758092
2.01594	15.8806	1.939	0.551627		1.60116	-77.0607	0.358529	-1.56051		2.05165	-105.203	-0.538036	-1.97984		3.95622	175.912	-3.94616	0.282018		1.07861	71.1632	0.348256	1.02085
1.64806	60.9526	0.800186	1.44076		2.82424	-155.229	-2.56437	-1.18336		1.38077	-68.7618	0.500178	-1.28699		3.61158	169.304	-3.54883	0.670293		3.28144	19.8491	3.08649	1.11419
2.33938	-112.773	-0.905515	-2.15702		1.38159	-93.8858	-0.0936281	-1.37841		3.14427	-156.284	-2.87874	-1.26463		0.78741	68.5385	0.288094	0.732814		1.71847	62.097	0.804204	1.51868
2.53338	-130.831	-1.65639	-1.91687		1.96311	-138.007	-1.45904	-1.31339		1.64337	-133.116	-1.12321	-1.19961		2.31287	125.129	-1.33087	1.8916		1.81651	95.6896	-0.180086	1.80757
1.35127	-75.2008	0.345158	-1.30645		1.00086	-39.5553	0.771677	-0.637373		1.4577	-149.288	-1.25325	-0.744473		2.0201	114.229	-0.829028	1.84214		1.49841	-128.066	-0.923872	-1.1797
1.73853	-122.777	-0.941177	-1.46173		0.89829	-166.608	-0.873862	-0.208062		3.10227	-172.231	-3.0738	-0.419376		3.60599	144.745	-2.94463	2.08142		2.37315	-155.486	-2.15924	-0.984642
2.13921	-143.297	-1.71511	-1.27853		1.7934	172.116	-1.77645	0.246009		0.471461	-39.0216	0.366282	-0.296839		1.33968	-66.4188	0.535938	-1.22781		0.691264	-7.27594	0.685698	-0.0875472
1.09518	-98.0593	-0.153542	-1.08437		0.184289	66.1843	0.074415	0.168596		0.357182	-141.096	-0.277958	-0.224317		2.95718	-19.2403	2.79201	-0.974483		0.996229	154.242	-0.897239	0.432937
1.42553	-49.0264	0.934738	-1.07629		0.954688	129.202	-0.603411	0.739814		3.33407	178.269	-3.33254	0.10074		2.34744	-13.571	2.28189	-0.550826		2.29759	165.486	-2.22426	0.575826
1.01882	-142.764	-0.811138	-0.616481		3.46292	-40.758	2.62307	-2.26082		0.798651	-177.9	-0.798114	-0.0292588		0.282849	-32.6405	0.238179	-0.152559		0.847324	123.586	-0.468735	0.705865
2.39824	-171.454	-2.37161	-0.356403		1.10898	-43.8356	0.799943	-0.768073		1.65293	158.525	-1.53817	0.605131		0.162701	96.0171	-0.0170551	0.161805		1.16366	85.0923	0.0995531	1.15939
0.295766	23.2351	0.271778	0.116681		2.36048	-18.9198	2.23296	-0.765372		2.2534	146.265	-1.87396	1.25144		3.03922	8.39577	3.00665	0.443756		2.00289	34.1844	1.65686	1.12534
1.0226	7.35008	1.0142	0.130823		0.260297	-39.6608	0.200386	-0.166132		3.78815	-57.0337	2.0613	-3.17822		1.37938	48.5597	0.912927	1.03404		1.5016	52.5026	0.91406	1.19134
1.15201	148.405	-0.981257	0.603549		2.2428	4.8131	2.23489	0.188184		4.30212	-50.4808	2.73759	-3.3187		1.95636	-45.1589	1.37951	-1.38719		1.89959	71.2889	0.609383	1.79919
1.93252	161.517	-1.83283	0.612666		1.64854	2.39755	1.6471	0.0689633		3.23412	-61.8464	1.52597	-2.85147		3.20171	-27.5146	2.83957	-1.47911		2.51627	48.9222	1.6534	1.89681
2.2973	-162.99	-2.19681	-0.672046		1.18437	179.326	-1.18428	0.0139328		5.52771	-30.3877	4.76833	-2.79619		0.844913	-95.5722	-0.082041	-0.840921		2.8354	62.0161	1.33044	2.50389
3.11541	-167.542	-3.04206	-0.672046		0.490667	129.999	-0.31539	0.375876		2.50509	-78.2732	0.509147	-2.4528		1.13233	-74.4951	0.302696	-1.09113		1.31076	-123.986	-0.732708	-1.08684
2.57949	-167.871	-2.5219	-0.542007		0.920382	20.3152	0.863132	0.319542		3.54282	-32.5285	2.98704	-1.90505		1.49221	-40.2294	1.13925	-0.963745		1.34426	-69.0809	0.479967	-1.25565
3.258	172.376	-3.2292	0.432226		1.24016	151.841	-1.09338	0.585254		2.62768	-43.9348	1.89227	-1.82319		1.50752	-146.546	-1.25777	-0.831048		1.60541	-161.34	-1.52102	-0.513654
1.95941	157.229	-1.80669	0.758383		0.957054	123.921	-0.534089	0.794167		2.27832	-20.5593	2.13322	-0.800095		2.40351	-3.91389	2.39791	-0.164057		0.392447	-36.5634	0.315213	-0.233786
2.51461	155.031	-2.27959	1.06148		2.43239	152.603	-2.15958	1.11926		1.59062	-12.1325	1.55509	-0.334304		3.03355	0.252104	3.03352	0.0133477		2.19434	-149.181	-1.88448	-1.12422
1.70755	146.057	-1.41657	0.953442		1.3671	72.2623	0.416499	1.30211		0.606798	-121.106	-0.313489	-0.519546		1.32516	176.573	-1.32279	0.0792254		1.05697	-149.337	-0.909183	-0.539044
4.1783	164.046	-4.01735	1.1485		1.4204	103.21	-0.324583	1.38281		1.23999	-173.393	-1.23176	-0.142682		2.4324	175.074	-2.42342	0.208859		0.813534	135.886	-0.584086	0.566287
4.11295	158.073	-3.81543	1.53585		0.668293	-101.1	-0.128657	-0.655792		1.0505	11.2939	1.03016	0.205732		0.226791	112.673	-0.0874212	0.209264		2.14362	152.348	-1.89878	0.994852
2.0487	139.019	-1.54661	1.34356		1.50316	177.014	-1.50112	0.0783025		1.63102	136.775	-1.18848	1.11703		1.05455	142.557	-0.837274	0.641137		2.81758	157.319	-2.59969	1.08644
3.38018	153.171	-3.01632	1.5256		0.138338	174.447	-0.137688	0.0133864		1.92121	52.1464	1.17894	1.51695		1.4715	28.3388	1.29515	0.698497		3.26463	154.727	-2.95216	1.39377
1.97715	125.798	-1.15649	1.60364		1.56468	146.718	-1.30804	0.85864		2.00724	121.358	-1.04453	1.71405		1.50238	95.766	-0.150938	1.49478		3.11157	145.277	-2.55744	1.77238
2.31844	123.705	-1.28653	1.92873		2.42866	155.978	-2.21831	0.988679		1.51532	-153.934	-1.3612	-0.665848		2.27859	-70.723	0.752243	-2.15084		2.60436	-46.1036	1.80575	-1.87668
2.75718	125.869	-1.61552	2.23431		1.83706	118.312	-0.871277	1.61731		2.52405	-167.744	-2.46653	-0.535809		2.43949	-57.1672	1.32267	-2.0498		1.54037	-77.4902	0.333654	-1.5038
3.24173	131.894	-2.16468	2.41308		2.10262	-106.705	-0.604401	-2.01388		2.79397	176.323	-2.78822	0.179187		2.06905	-86.0835	0.141321	-2.06421		3.69802	-17.4281	3.52826	-1.10759
4.09862	140.189	-3.14839	2.62418		1.70727	-131.741	-1.13664	-1.2739		3.32621	174.662	-3.31178	0.309445		1.79943	-101.419	-0.35626	-1.76381		3.01287	-13.796	2.92596	-0.718466
2.11875	-87.596	0.0888725	-2.11689		1.29386	-100.076	-0.226364	-1.2739		1.00242	133.089	-0.684785	0.732066		2.51225	-31.3496	2.14548	-1.30702		2.15643	-17.2805	2.05909	-0.640568
2.1713	-64.6158	0.930806	-1.96167		1.45408	-145.731	-1.20166	-0.818764		3.40461	162.485	-3.24676	1.02466		1.32305	-115.112	-0.56149	-1.198		0.839921	-4.66645	0.837137	-0.0683318
2.00548	-107.961	-0.618425	-1.90774		1.40546	173.606	-1.39672	0.156528		1.82772	132.61	-1.23736	1.34517		0.653644	-151.341	-0.573565	-0.313487		1.7085	-2.42503	1.70697	-0.0722903
1.47992	-133.231	-1.01366	-1.07827		1.36453	15.8831	1.31244	0.373441		4.00144	160.286	-3.76692	1.34976		1.65009	10.4134	1.62291	0.298254		4.43287	2.12637	4.42982	0.164476
1.42078	-71.8349	0.442935	-1.34997		1.23624	127.261	-0.748479	0.983906		3.8133	147.543	-3.21765	2.04646		0.466892	70.8989	0.152784	0.441186		3.14138	3.88584	3.13416	0.212888
1.05719	-32.8206	0.888429	-0.573007		1.46737	59.3104	0.748928	1.26186		0.980496	-27.3166	0.871155	-0.449956		1.9269	21.9766	1.78689	0.721099		0.480857	61.874	0.226682	0.424074
1.75497	-161.457	-1.66385	-0.558118		1.76794	-11.7325	1.731	-0.359498		1.31733	-8.60625	1.3025	-0.19713		1.47715	25.7471	1.3305	0.641675		0.512183	-103.051	-0.115656	-0.498954
0.823762	164.819	-0.795016	0.215717		0.330536	-37.2301	0.263177	-0.19998		0.269501	156.47	-0.247091	0.107594		0.704411	-10.5392	0.692528	-0.128842		3.08625	-178.148	-3.08464	-0.0997387
0.547479	2.08879	0.547115	0.0199547		0.916118	5.02336	0.9126	0.0802171		0.957285	18.9171	0.905581	0.310351		1.27412	-3.69139	1.27148	-0.0820307		1.87163	152.108	-1.65421	0.875554
0.547863	78.0799	0.113159	0.536049		0.858736	42.3088	0.635059	0.578038		3.74512	9.26241	3.69629	0.6028		0.368666	-164.466	-0.355199	-0.0987333		1.98602	167.857	-1.94158	0.417774
0.615277	-111.628	-0.226775	-0.57196		2.89947	24.2179	2.6443	1.18939		3.35084	13.3254	3.26062	0.772301		1.45775	160.783	-1.37652	0.479824		2.5082	141.765	-1.97013	1.55231
0.0343599	4.62551	0.034248	0.00277087		2.24968	39.4045	1.73829	1.42807		1.7801	35.4883	1.44942	1.03341		1.91788	146.031	-1.59057	1.07162		1.46235	90.1122	-0.00286286	1.46235
0.674719	143.839	-0.544743	0.398121		1.84302	50.2677	1.17806	1.41736		1.37637	94.4257	-0.106209	1.37227		1.11021	101.205	-0.215733	1.08905		0.578457	-92.7576	-0.0278303	-0.577787
1.13793	120.351	-0.574991	0.981968		1.91301	57.2674	1.0344	1.60923		1.61419	59.6355	0.815973	1.39277		1.81538	37.6612	1.43712	1.10918		0.570681	-12.9303	0.55621	-0.127699
2.60761	133.267	-1.78724	1.89878		2.79263	40.9386	2.10958	1.82987		3.16237	37.1551	2.52042	1.90999		1.90268	122.866	-1.03252	1.59815		1.17472	131.366	-0.776335	0.881629
1.90124	85.397	0.152577	1.89511		2.31372	61.3283	1.1101	2.03002		2.22652	67.5891	0.848853	2.05836		2.51655	113.548	-1.00539	2.30699		0.601314	65.6742	0.247696	0.547928
2.13591	97.0664	-0.262759	2.11969		1.73287	-128.949	-1.08932	-1.34767		3.97763	52.3604	2.42911	3.14975		4.64184	-103.443	-1.07911	-4.51466		2.35789	-57.7276	1.25899	-1.99364
2.5839	79.6673	0.463459	2.542		2.26727	-162.669	-2.16434	-0.67539		0.614067	-19.6188	0.578419	-0.206179		4.52276	-108.785	-1.45639	-4.28186		2.87959	-24.633	2.61753	-1.20022
0.550849	-51.8334	0.340397	-0.433088		1.1454	-168.913	-1.12402	-0.220254		0.989031	-0.550183	0.988985	-0.00949702		4.15759	-123.67	-2.30501	-3.46013		0.996198	-39.0089	0.774094	-0.627048
0.421849	-153.893	-0.378809	-0.185635		1.77651	-177.089	-1.77422	-0.0902146		0.613206	144.65	-0.500152	0.354781		2.57361	-75.6071	0.639721	-2.49283		1.73517	-13.8905	1.68443	-0.416558
0.230682	97.6566	-0.030735	0.228625		1.0593	-178.637	-1.05901	-0.0251951		0.858251	41.641	0.64139	0.570275		2.92588	-55.8397	1.64291	-2.42107		0.674796	-8.37826	0.667595	-0.0983231
3.48453	-107.075	-1.02312	-3.33094		2.03469	171.614	-2.01293	0.296753		3.5361	13.8476	3.43333	0.846329		3.17382	-135.134	-2.24947	-2.23898		0.519704	-173.167	-0.516013	-0.0618323
2.81464	-82.2832	0.377943	-2.78915		0.560292	73.204	0.161905	0.53639		3.1752	18.5892	3.00955	1.01219		1.88194	-77.3096	0.413432	-1.83597		2.07843	165.416	-2.01146	0.523343
3.18212	-113.574	-1.27261	-2.91656		1.60502	152.479	-1.4234	0.741635		1.80445	46.2177	1.24853	1.30276		1.40246	-83.603	0.156257	-1.39372		1.24735	50.9695	0.7855	0.968956
2.11801	-64.6573	0.906575	-1.91418		1.95552	147.709	-1.65309	1.04468		1.69523	101.276	-0.331487	1.6625		2.04082	-32.0872	1.72906	-1.0841		1.9767	136.182	-1.42629	1.3686
1.38119	-73.9375	0.382155	-1.32726		1.4596	-143.879	-1.17902	-0.860425		1.7519	70.4443	0.586401	1.65084		0.953653	-92.0795	-0.0346045	-0.953025		2.16473	120.014	-1.08282	1.87444
2.84764	-149.498	-2.45355	-1.44538		1.24628	-39.8292	0.957091	-0.798246		3.11528	43.3713	2.26455	2.13933		2.54928	-155.217	-2.31448	-1.06863		3.00448	141.05	-2.33656	1.88875
0.661078	-37.6405	0.52348	-0.403724		1.12343	-172.573	-1.114	-0.14521		2.42104	75.363	0.61178	2.34247		0.973187	-116.151	-0.428919	-0.873569		2.75376	82.4985	0.359511	2.73019
1.44071	-12.1633	1.40837	-0.303557		0.242749	-61.2874	0.116621	-0.212901		4.04212	57.2561	2.18632	3.39982		1.44414	-34.7001	1.18729	-0.822119		1.61134	-25.336	1.45635	-0.689533
0.938726	-8.88488	0.927462	-0.144986		1.82928	178.439	-1.8286	0.0498315		1.67827	-42.6467	1.23444	-1.13699		0.546358	-45.1246	0.385493	-0.387173		1.5597	-143.921	-1.26055	-0.918515
0.124635	97.2654	-0.0157622	0.123634		1.42777	151.864	-1.25905	0.6733		2.75337	-20.709	2.57547	-0.973652		1.32917	-16.7349	1.27288	-0.382726		0.658421	-100.308	-0.117813	-0.647795
2.97593	176.534	-2.97049	0.179917		1.15521	137.908	-0.857254	0.774359		0.345583	-41.1859	0.260078	-0.227568		0.182757	-35.589	0.14862	-0.106359		0.308732	-8.41929	0.305405	-0.0452033
2.27969	167.391	-2.22471	0.497652		0.830297	54.3706	0.483682	0.674867		0.277763	-16.6992	0.266049	-0.0798147		0.0121223	0	0.0121223	0		1.38631	146.416	-1.1549	0.766854
1.97468	-168.552	-1.93539	-0.39194		0.967762	78.3578	0.195295	0.947852		0.117216	56.3099	0.0650195	0.0975293		0.900501	167.747	-0.879987	0.191114		1.66132	112.666	-0.640201	1.53301
0.865962	-101.988	-0.179867	-0.847077		1.78546	99.4724	-0.293837	1.76112		0.5332	115.201	-0.227035	0.482449		0.44776	171.651	-0.443014	0.0650195		1.49529	93.0693	-0.0800622	1.49314
1.61749	-156.228	-1.48026	-0.652018		2.14295	-106.598	-0.612135	-2.05366		0.670206	64.5367	0.288144	0.605102		0.936082	61.066	0.452878	0.819239		2.84093	-62.4849	1.31246	-2.51959
3.11677	-175.18	-3.10574	-0.261901		2.10274	-124.709	-1.19731	-1.72857		1.02651	96.1702	-0.110331	1.02056		2.20524	134.786	-1.5535	1.56517		1.81778	-86.2986	0.117351	-1.81399
2.03775	163.742	-1.95627	0.570479		1.47686	-96.1024	-0.156998	-1.46849		1.05894	70.0169	0.361885	0.995185		2.40696	84.1698	0.244499	2.39451		1.6225	-52.5522	0.986543	-1.28812
0.391478	88.3212	0.0114686	0.39131		2.46242	-148.859	-2.10758	-1.27343		3.12922	24.4919	2.84765	1.29726		3.74954	-82.7827	0.471066	-3.71983		1.12796	-55.871	0.632852	-0.933703
2.76254	158.117	-2.5635	1.02962		0.172354	-69.4919	0.0603825	-0.161431		2.27684	46.7357	1.56047	1.658		3.54697	-54.3364	2.06797	-2.88175		1.48812	-8.69274	1.47103	-0.224908
1.23888	95.3191	-0.114848	1.23355		1.17572	-155.198	-1.06727	-0.493197		1.86273	-134.692	-1.31005	-1.32421		2.24783	-84.3551	0.221104	-2.23693		1.20826	154.898	-1.09414	0.512586
3.50456	152.4	-3.10574	1.62366		0.362881	114.727	-0.151793	0.329608		0.544061	-91.017	-0.00965636	-0.543975		2.37129	-63.2476	1.0674	-2.11747		3.29709	-42.82	2.41839	-2.24102
2.70359	137.724	-2.00041	1.81872		3.36693	-101.863	-0.692143	-3.29502		1.12555	-172.143	-1.11499	-0.153858		1.9067	-64.9497	0.807326	-1.72735		1.42307	-32.2056	1.20412	-0.758436
1.21077	-165.052	-1.1698	-0.312316		2.73389	-103.03	-0.616398	-2.6635		3.53619	-123.343	-1.94366	-2.95412		1.38954	-114.984	-0.586892	-1.25952		3.1769	-7.91879	3.14661	-0.437679
0.372226	-150.68	-0.324542	-0.182277		3.18724	-53.9331	1.87642	-2.57634		2.11262	-125.554	-1.22844	-1.71875		2.3973	-27.6651	2.12323	-1.11307		1.19934	-7.99691	1.18767	-0.166851
1.17595	157.045	-1.08283	0.458623		3.37235	-133.412	-2.31763	-2.44977		1.15875	-107.729	-0.352857	-1.10372		1.82826	-27.982	1.61453	-0.857811		0.415838	33.961	0.344904	0.232299
0.896747	71.7586	0.2807	0.851682		2.44754	-112.896	-0.952221	-2.25471		2.40061	-177.773	-2.39879	-0.0932657		0.817958	-92.6577	-0.037928	-0.817078		0.569214	99.1484	-0.0905005	0.561973
1.5975	120.038	-0.799674	1.38294		2.76425	-44.3743	1.97585	-1.93316		2.72261	149.002	-2.33377	1.40218		2.74904	-76.2676	0.652587	-2.67046		2.29217	18.6493	2.17182	0.732977
1.33857	101.179	-0.259522	1.31317		1.4824	-74.9763	0.384266	-1.43173		0.654246	-109.29	-0.21613	-0.617516		2.8028	-52.8209	1.69376	-2.23313		1.10324	104.977	-0.285117	1.06576
3.17622	151.65	-2.79528	1.50823		2.41639	-140.424	-1.86249	-1.53949		0.5332	-19.179	0.503605	-0.175167		3.72786	-34.737	3.06347	-2.12417		1.05239	169.271	-1.03399	0.195914
1.64991	81.6155	0.240583	1.63227		1.33818	-111.232	-0.484623	-1.24734		1.47589	158.199	-1.37033	0.54813		3.62337	-24.8795	3.2871	-1.52439		1.96423	172.34	-1.94671	0.261811
2.57011	115.146	-1.09212	2.32653		2.09275	-148.899	-1.79193	-1.08101		0.936033	159.677	-0.877763	0.325098		1.39135	-91.0586	-0.0257054	-1.39112		0.563897	135.057	-0.399133	0.398337
2.47369	98.6908	-0.373778	2.44529		1.73879	-32.1474	1.4722	-0.925209		1.2358	56.6593	0.679215	1.03241		0.222255	-85.3258	0.0181114	-0.221516		0.860881	155.693	-0.784569	0.354356
3.50973	122.992	-1.91114	2.94377		1.21602	-24.3787	1.10759	-0.501931		2.14096	134.397	-1.49787	1.52974		1.14824	-3.87416	1.14561	-0.0775809		1.13242	36.4295	0.911135	0.67247
3.15788	107.278	-0.937927	3.01538		2.74099	-102.77	-0.605864	-2.67319		3.07677	120.669	-1.56939	2.64642		2.05508	0.972924	2.05478	0.0348951		1.36242	60.6586	0.667606	1.18765
3.18283	99.0458	-0.500415	3.14325		2.5455	-86.2679	0.165689	-2.5401		2.50072	105.446	-0.666029	2.41039		3.3757	13.4747	3.28277	0.786588		1.85965	-76.8719	0.422382	-1.81105
1.39587	-48.4408	0.926013	-1.04449		2.08977	-90.5344	-0.0194907	-2.08968		3.58802	92.5114	-0.157218	3.58458		0.898174	94.8035	-0.0752117	0.895019		1.17039	-29.9381	1.01422	-0.5841
1.65348	-43.4621	1.20014	-1.13738		2.18102	-131.627	-1.44881	-1.63028		2.48702	-105.442	-0.66221	-2.39724		1.08466	74.0456	0.298141	1.04288		2.53429	-18.3993	2.40474	-0.79992
1.44113	-25.3016	1.30288	-0.615914		2.3649	-134.114	-1.64618	-1.6979		2.1999	-122.207	-1.17249	-1.8614		1.84194	-104.655	-0.466018	-1.78202		0.143816	18.7463	0.136187	0.0462196
1.9823	-3.57293	1.97845	-0.123535		2.87097	-145.337	-2.36139	-1.63288		2.02764	-46.3517	1.39954	-1.46718		1.72471	-62.263	0.802706	-1.52653		0.262199	90.1032	-0.00047243	0.262199
0.103093	160.572	-0.0972229	0.0342902		1.64707	-97.5267	-0.215747	-1.63288		0.503032	-158.228	-0.467151	-0.186578		1.28784	-96.6533	-0.14921	-1.27917		1.70398	-16.1083	1.63708	-0.472777
1.71058	11.0427	1.67891	0.327646		1.39916	-135.385	-0.995981	-0.982681		1.12163	-108.379	-0.353653	-1.06442		1.55481	-48.866	1.02279	-1.17104		0.0478227	15.4831	0.0460872	0.0127665
0.739302	134.937	-0.522187	0.523344		1.00542	-114.116	-0.410805	-0.917662		1.19766	-137.105	-0.877414	-0.815191		1.37388	-145.154	-1.12753	-0.784992		2.00832	13.3332	1.95418	0.463146
1.13331	102.402	-0.243408	1.10686		1.26355	-173.756	-1.25606	-0.137428		2.27154	-170.88	-2.24282	-0.360054		1.61227	-18.1284	1.53224	-0.501654		0.700312	108.498	-0.222193	0.664129
2.1018	33.5262	1.75213	1.16086		1.66984	-4.36633	1.66499	-0.12713		0.105022	-45.3665	0.0737849	-0.0747349		0.953535	-40.8276	0.721522	-0.623407		1.9463	51.6192	1.20843	1.52571
2.73794	36.5189	2.20038	1.62931		1.75347	165.337	-1.69636	0.443867		1.79383	148.385	-1.52761	0.940336		1.25902	177.257	-1.25757	0.060262		1.78009	85.8195	0.129766	1.77536
1.98559	84.2388	0.199319	1.97556		1.7812	144.556	-1.45112	1.03292		1.3808	116.005	-0.605415	1.241		1.08352	34.9081	0.888564	0.620057		1.36695	-84.892	0.121703	-1.36152
3.57347	-59.8676	1.79388	-3.09058		1.96147	58.5285	1.02403	1.67293		2.66504	127.018	-1.60454	2.12788		3.44678	-72.4303	1.04047	-3.28599		1.55453	-41.9126	1.15683	-1.03842
3.69859	-33.5804	3.08134	-2.04572		1.03741	-87.6676	0.0422191	-1.03655		2.66346	56.4625	1.47151	2.22006		2.88124	-47.9672	1.92915	-2.14007		2.61182	-22.0269	2.42118	-0.979543
3.01304	-48.7909	1.98502	-2.26674		1.50825	-45.446	1.05816	-1.07477		3.41123	148.573	-2.91082	1.77867		2.49831	-111.222	-0.904362	-2.32888		1.04995	-106.842	-0.304211	-1.00491
1.67846	-83.9127	0.17799	-1.669		0.517451	-85.0377	0.04476	-0.515512		3.28246	144.899	-2.68552	1.88746		1.94273	-91.6897	-0.0572828	-1.94189		1.69756	-16.1505	1.63056	-0.472196
2.69023	-21.806	2.49774	-0.999325		1.90517	-8.88197	1.88232	-0.294157		0.752491	-59.2061	0.385239	-0.646401		1.72488	-54.3384	1.0056	-1.40142		0.674856	-151.578	-0.593511	-0.321207
1.99064	-28.2257	1.75394	-0.941464		0.0450011	1.01398	0.044994	0.000796354		1.54573	-19.4187	1.4578	-0.513907		1.38836	-53.6955	0.822016	-1.11886		2.43863	31.5138	2.07897	1.27468
1.37904	-40.6907	1.04565	-0.899104		0.695096	-4.29183	0.693147	-0.0520186		0.802658	-133.116	-0.548602	-0.585914		0.801484	-118.644	-0.384206	-0.703393		1.26173	-40.2773	0.962607	-0.815696
2.47226	-102.573	-0.53816	-2.41297		0.466076	98.2356	-0.0667627	0.46127		0.438518	-162.649	-0.418563	-0.130778		0.137864	-59.0362	0.0709304	-0.118217		3.44951	-172.72	-3.4217	-0.437099
1.88984	-53.3125	1.12908	-1.51547		0.822691	52.5695	0.500031	0.653291		0.635354	-11.8784	0.621749	-0.130778		1.63144	2.40908	1.63	0.068576		2.38146	173.339	-2.36538	0.276246
2.96616	-31.8107	2.52062	-1.5635		1.30788	137.461	-0.963675	0.884243		1.20692	2.62516	1.20566	0.0552792		0.207891	2.04541	0.207759	0.00741995		1.09181	-7.61128	1.08219	-0.144612
0.830131	-34.7454	0.682113	-0.473117		0.54871	13.7636	0.532955	0.130547		0.746434	170.137	-0.7354	0.127864		2.45716	-131.337	-1.62292	-1.84493		0.220129	29.3783	0.19182	0.107989
1.94449	-163.157	-1.86108	-0.563412		0.520193	126.452	-0.309075	0.418417		1.98716	4.32004	1.98151	0.149688		1.64658	-50.0945	1.05632	-1.2631		0.326338	71.8244	0.101795	0.310056
1.58865	-5.99573	1.57996	-0.165941		0.4542	65.6313	0.187406	0.413735		0.120221	28.2484	0.105903	0.0569001		1.1348	-65.1699	0.476537	-1.0299		1.70571	144.268	-1.38463	0.996127
1.21108	166.897	-1.17955	0.274549		1.24409	150.05	-1.07795	0.621107		2.94362	11.6229	2.88326	0.593047		1.53137	-31.6966	1.30296	-0.804616		1.24424	-64.2836	0.539896	-1.121
0.30096	66.4482	0.120257	0.275889		0.803163	62.9089	0.365766	0.715043		1.38259	32.9734	1.15989	0.752476		1.88016	-165.224	-1.81798	-0.479519		0.805977	-42.5226	0.594014	-0.544744
1.53644	-38.8605	1.19639	-0.963999		1.06683	114.602	-0.44413	0.969992		0.845306	70.6452	0.280148	0.797533		0.453594	126.824	-0.271868	0.363092		0.831546	176.794	-0.830245	0.0465028
0.655384	-66.7271	0.258949	-0.602058		1.60871	107.838	-0.492779	1.53138		2.24206	39.83	1.72179	1.43606		1.08816	46.0269	0.75553	0.783111		0.793698	148.091	-0.673759	0.419531
1.48749	160.033	-1.39808	0.507937		2.10709	124.981	-1.20799	1.72644		2.71856	31.0226	2.3297	1.40108		1.04559	121.495	-0.546243	0.891555		1.72399	146.546	-1.43837	0.950378
0.775271	89.0639	0.0126661	0.775168		2.12335	65.2087	0.890348	1.92766		1.95005	83.8364	0.209372	1.93878		1.07036	-25.4848	0.966217	-0.460547		2.09606	85.4867	0.164942	2.08956
1.18683	124.162	-0.666445	0.982044		0.809958	-19.2843	0.764512	-0.267493		2.88015	48.1352	1.92214	2.1449		0.45083	-52.9061	0.271906	-0.359604		1.50748	-75.8221	0.369233	-1.46156
1.04504	73.8355	0.290934	1.00372		0.0625659	157.797	-0.0579265	0.0236435		3.93671	41.516	2.94769	2.60936		0.135412	-162.272	-0.128982	-0.0412319		0.491218	-156.749	-0.451323	-0.193914
2.26947	-76.2312	0.540144	-2.20426		1.43812	0.829714	1.43797	0.020825		3.55848	53.0735	2.1379	2.84468		0.915647	14.39	0.88692	0.227557		0.149312	30.817	0.12823	0.0764922
1.70318	-98.3195	-0.246439	-1.68526		0.776676	29.8054	0.673936	0.386052		3.12464	81.5635	0.458424	3.09083		2.15783	8.96419	2.13147	0.336226		2.60028	175.679	-2.59289	0.195894
2.47506	-66.6994	0.97902	-2.2732		1.02558	136.299	-0.741444	0.708566		4.34991	48.6934	2.87133	3.2676		1.09431	136.396	-0.792418	0.754707		0.700762	124.719	-0.399117	0.575997
1.48471	-58.901	0.766881	-1.27132		1.89453	36.5622	1.52171	1.12856		1.75826	-114.879	-0.739702	-1.59509		1.75636	28.0017	1.55075	0.82461		2.90486	153.381	-2.59697	1.30153
2.4907	-37.9065	1.9652	-1.53022		1.23934	72.4899	0.372887	1.18192		1.58952	-74.2804	0.430649	-1.53007		1.39248	59.0421	0.716305	1.19412		2.30627	143.671	-1.85799	1.36629
2.52657	-33.5983	2.10447	-1.39812		1.89183	105.547	-0.50706	1.82261		1.53514	-161.396	-1.45492	-0.489757		2.29087	36.9923	1.82976	1.37844		3.94614	-121.694	-2.07324	-3.35763
2.39324	-19.7724	2.25215	-0.809595		2.1335	58.3371	1.11992	1.81593		0.286185	102.792	-0.0633648	0.279082		1.85833	123.264	-1.0193	1.55384		3.04833	-130.548	-1.98168	-2.3163
0.812619	141.046	-0.631934	0.510891		2.12816	98.1004	-0.299875	2.10693		1.43943	-138.084	-1.07111	-0.961604		1.46153	107.341	-0.435619	1.3951		2.23328	-103.823	-0.533577	-2.1686
1.75563	15.356	1.69296	0.46492		2.41033	-120.506	-1.22355	-2.07668		2.06996	-171.347	-2.0464	-0.311409		2.49164	53.7288	1.47408	2.00882		3.10909	-147.633	-2.62605	-1.66441
0.622084	75.8018	0.152583	0.603081		1.97406	-65.5109	0.818289	-1.79647		0.769626	41.8272	0.573494	0.513253		3.10034	42.8736	2.2721	2.10942		1.08989	-91.7349	-0.0329961	-1.08939
2.37114	14.8053	2.29242	0.605911		1.86429	-110.024	-0.638373	-1.75159		1.15168	144.799	-0.941072	0.663883		2.70203	88.6259	0.0647969	2.70125		1.9206	-152.707	-1.70679	-0.880669
2.702	19.8187	2.54197	0.916102		1.34142	-58.0643	0.70957	-1.13839		1.38885	80.5607	0.227774	1.37004		2.24108	-50.4252	1.42776	-1.72741		0.519342	-23.5664	0.476027	-0.207639
1.28575	109.188	-0.422579	1.21433		1.59852	-136.448	-1.15853	-1.10139		3.27973	147.355	-2.76162	1.76921		1.79864	-22.3182	1.6639	-0.683031		1.54533	169.627	-1.52008	0.278236
2.89805	33.464	2.41765	1.59802		1.18424	-134.73	-0.833432	-0.841313		1.92192	80.5524	0.315475	1.89585		1.21677	-48.4095	0.807696	-0.910034		2.29484	-91.6013	-0.0641288	-2.29394
1.10096	-108.484	-0.349044	-1.04416		0.393747	-64.93	0.166841	-0.356652		2.98591	122.355	-1.59793	2.52236		2.98424	-15.724	2.87257	-0.808743		1.20773	-134.358	-0.844363	-0.863512
0.913259	-66.7597	0.360362	-0.839155		0.89453	-16.0388	0.859711	-0.247148		3.03275	102.015	-0.631333	2.96631		0.816706	-140.131	-0.626831	-0.523538		1.16439	-43.4619	0.845153	-0.800954
1.69207	-165.49	-1.63809	-0.423954		2.38227	-53.9959	1.4004	-1.9272		3.4961	-87.6551	0.143043	-3.49317		0.403302	-67.3539	0.155287	-0.372208		0.519029	-128.446	-0.322719	-0.406501
2.16051	-177.377	-2.15825	-0.0988562		2.38331	-70.5455	0.79378	-2.24724		3.434	-108.325	-1.07966	-3.25986		0.970097	-15.3855	0.935332	-0.257379		0.404959	148.148	-0.343978	0.213707
0.580595	10.9583	0.570009	0.110368		2.71447	-36.2638	2.18868	-1.60562		3.34956	-123.964	-1.8713	-2.77809		0.458634	-7.17287	0.455045	-0.0572666		0.863513	143.967	-0.698302	0.507965
1.27902	152.479	-1.13429	0.591001		1.73659	-87.5776	0.0734007	-1.73504		2.52433	-52.9655	1.52039	-2.0151		0.901418	28.6771	0.790848	0.432566		2.13944	166.432	-2.07973	0.501897
0.501847	122.913	-0.272684	0.4213		1.69621	-78.4837	0.338643	-1.66206		3.34131	-99.3545	-0.543104	-3.29687		0.842902	84.4337	0.0817599	0.838927		0.888013	58.1362	0.468784	0.754194
1.99573	139.753	-1.52327	1.28942		1.8063	-53.8583	1.06533	-1.4587		3.86658	-131.441	-2.55908	-2.89855		2.72365	28.023	2.40432	1.27964		0.144721	-48.6571	0.0955972	-0.108652
2.79862	160.633	-2.64026	0.928048		2.90733	-27.6211	2.57599	-1.3479		3.48356	-125.654	-2.03054	-2.83056		1.62227	82.6233	0.208288	1.60885		1.45905	119.07	-0.708907	1.27525
1.60487	102.702	-0.352884	1.56559		1.07967	-105.261	-0.284183	-1.04159		2.68409	-110.346	-0.933221	-2.51664		1.24108	-19.0316	1.17324	-0.404703		1.23338	69.8042	0.425799	1.15755
0.84939	5.04773	0.846096	0.074734		2.47137	-14.0509	2.39743	-0.60001		2.46765	-74.2318	0.670572	-2.37479		1.54653	-162.909	-1.47824	-0.454499		1.80859	49.2621	1.18028	1.37037
0.0273588	49.6965	0.0176967	0.0208646		0.477358	-130.742	-0.311552	-0.361671		2.3999	-104.678	-0.608124	-2.32158		1.27943	12.1525	1.25076	0.269337		1.81668	112.28	-0.688753	1.68106
0.794304	153.674	-0.711922	0.352258		0.0315066	-6.16405	0.0313244	-0.00338304		3.45553	-148.579	-2.94883	-1.80142		1.67161	155.115	-1.51641	0.703401		1.7319	77.481	0.375414	1.69073
0.622399	37.298	0.495115	0.37715		1.39827	0.956359	1.39808	0.0233384		1.60405	-60.8824	0.780536	-1.40133		1.18232	52.6614	0.717103	0.940018		3.70591	-64.454	1.59812	-3.34362
1.67349	137.412	-1.23208	1.13249		1.96447	-2.77737	1.96216	-0.0951891		1.73806	-117.524	-0.803182	-1.54134		2.66039	138.691	-1.99839	1.75616		2.75354	-96.9548	-0.333414	-2.73328
1.54153	57.271	0.83345	1.29679		0.800255	-6.74654	0.794713	-0.0940118		1.07783	-49.6426	0.697955	-0.82133		1.98987	45.903	1.3847	1.42905		2.24195	-70.7717	0.73835	-2.11688
3.09735	131.467	-2.05102	2.32097		3.65324	-112.259	-1.38381	-3.38101		1.42996	-138.036	-1.06326	-0.956169		1.89457	89.5109	0.0161718	1.8945		2.57049	-138.094	-1.91307	-1.71685
2.63132	87.0955	0.133331	2.62794		3.09136	-114.749	-1.29416	-2.80742		2.5723	-165.798	-2.49369	-0.631072		3.07822	128.036	-1.89668	2.42447		1.58294	-64.7362	0.675577	-1.43154
3.20142	96.4753	-0.361041	3.181		2.27576	-90.4633	-0.0184017	-2.27568		1.39278	-175.432	-1.38836	-0.110916		2.80068	59.189	1.43453	2.40539		2.14604	-26.007	1.92873	-0.940999
0.534317	-99.2789	-0.0861534	-0.527325		2.36773	-129.745	-1.51385	-1.82055		0.417574	-96.4521	-0.0469239	-0.414929		3.08083	116.799	-1.38904	2.74993		1.26438	-158.782	-1.17867	-0.457594
0.673687	-35.4582	0.548744	-0.390812		2.84967	-143.614	-2.29408	-1.69051		0.759619	-149.044	-0.651422	-0.39073		2.93562	107.711	-0.893062	2.79648		1.28532	-72.9702	0.376431	-1.22896
0.979542	-167.18	-0.955123	-0.217351		1.13791	-51.1006	0.714557	-0.885579		0.324486	36.2648	0.261631	0.191939		3.53061	-71.9157	1.09596	-3.3562		1.44562	-131.226	-0.952716	-1.08727
0.195473	-116.816	-0.0881841	-0.174451		1.15748	-107.263	-0.343499	-1.10533		1.27937	20.8491	1.19559	0.455336		2.96947	-69.3506	1.04718	-2.7787		0.376346	-52.0993	0.231187	-0.296966
1.78222	-2.53676	1.78047	-0.0788816		1.22041	-126.951	-0.733616	-0.975293		1.04795	90.0541	-0.0009891	1.04795		3.74964	-43.8278	2.70508	-2.5966		0.804182	-12.4735	0.7852	-0.173694
2.79086	17.9256	2.65538	0.858975		0.455508	-92.3153	-0.0184017	-0.455137		3.8671	-117.233	-1.76961	-3.43845		4.31594	-34.6183	3.55183	-2.45191		0.772985	153.644	-0.692638	0.343159
1.73564	31.0867	1.48638	0.89617		1.25964	-14.9566	1.21697	-0.325098		3.65844	-128.747	-2.28977	-2.85327		1.5886	-79.0341	0.302192	-1.5596		1.8748	8.99346	1.85175	0.293071
1.53315	126.771	-0.917767	1.22811		1.66434	171.01	-1.64389	0.260078		3.46867	-120.675	-1.76961	-2.98331		1.04237	-51.3799	0.650598	-0.814403		0.991303	46.7991	0.678604	0.722618
1.14824	86.3708	0.0726822	1.14593		2.35435	-69.2724	0.833267	-2.20196		3.5004	-136.756	-2.54985	-2.39814		3.16867	-13.6686	3.07893	-0.748774		0.940311	66.7903	0.370575	0.86421
2.83794	39.5682	2.18767	1.80775		2.1609	-99.8302	-0.368928	-2.12917		1.75387	-94.7137	-0.144127	-1.74794		0.812478	-117.212	-0.371527	-0.722556		1.02793	105.949	-0.282458	0.988363
2.49334	49.9316	1.60496	1.90809		2.68248	-54.5333	1.55645	-2.18476		1.80237	-113.43	-0.716667	-1.65377		2.50369	-0.602497	2.50355	-0.0263272		1.82426	32.1841	1.54395	0.971679
1.97674	99.8833	-0.339293	1.94741		1.11074	-77.1305	0.247397	-1.08284		1.18327	-39.2235	0.916664	-0.748238		0.118291	-48.9043	0.0777547	-0.0891455		2.71258	-62.1827	1.26583	-2.39912
2.32838	81.5295	0.342969	2.30298		2.57914	-35.5581	2.0982	-1.49984		1.08998	-148.001	-0.924361	-0.57759		4.21211	-68.9232	1.51475	-3.93032		3.24253	-28.9857	2.83637	-1.5713
2.8717	95.7399	-0.287205	2.8573		1.55393	-134.427	-1.08776	-1.10972		0.442686	16.2175	0.42507	0.123635		3.46534	-62.1513	1.61879	-3.064		2.38026	-10.8219	2.33793	-0.446908
3.08137	77.7416	0.654241	3.01111		1.53007	-20.4861	1.43331	-0.535495		1.00057	143.393	-0.803203	0.596665		2.55486	-103.116	-0.579765	-2.48821		0.491723	-155.872	-0.448762	-0.201008
0.439605	119.118	-0.213919	0.384046		0.403063	-78.1757	0.0825923	-0.39451		0.406632	98.0074	-0.0566443	0.402667		2.58792	-49.3425	1.68613	-1.96325		0.388618	82.9733	0.0475403	0.385699
1.36841	151.455	-1.20207	0.653895		0.634891	-0.271285	0.634884	-0.00300608		1.19924	127.705	-0.733458	0.9488		1.82438	-70.5576	0.607262	-1.72035		0.905261	-169.841	-0.891069	-0.159668
1.67492	101.067	-0.321514	1.64377		0.0769853	36.2803	0.0620603	0.0455549		1.20537	63.8532	0.531175	1.08202		2.06315	-92.1733	-0.0782391	-2.06167		0.999553	5.10241	0.995592	0.0888965
3.10611	133.689	-2.14551	2.24604		0.536257	125.841	-0.314001	0.434713		1.52354	102.405	-0.327285	1.48797		4.08972	-31.1113	3.50147	-2.11317		2.31461	16.7757	2.2161	0.668054
0.237737	21.8379	0.220677	0.0884339		2.01378	-43.1687	1.46873	-1.37772		3.8973	-100.617	-0.71806	-3.83058		2.10612	-68.2925	0.778986	-1.95676		1.19951	91.8733	-0.0392109	1.19887
0.503404	88.6139	0.0121773	0.503257		1.19654	-60.0262	0.597798	-1.03651		3.93852	-77.9667	0.8211	-3.85198		1.32019	-88.7641	0.0284746	-1.31988		2.13033	124.179	-1.19679	1.76239
1.54618	23.8309	1.41436	0.624718		2.89384	-21.9337	2.68438	-1.08095		3.70869	-55.1968	2.11677	-3.04527		2.50696	-25.3809	2.26499	-1.07457		2.84333	41.9689	2.11404	1.90142
1.36827	100.307	-0.24481	1.34619		1.65351	-34.3772	1.3647	-0.933637		3.66402	-122.052	-1.94446	-3.1055		1.15418	-28.0356	1.01875	-0.54249		1.37734	-22.3024	1.27431	-0.522694
1.98483	47.7756	1.33388	1.4698		0.818629	-37.5314	0.649189	-0.498705		1.48052	-66.4139	0.592395	-1.35683		0.690512	-172.983	-0.685341	-0.0843496		4.80281	-4.52766	4.78782	-0.379136
1.83879	115.549	-0.793026	1.65899		0.29093	-66.8949	0.114166	-0.267593		2.16538	-121.356	-1.12677	-1.84913		2.76628	6.03801	2.75093	0.29098		1.10535	-107.288	-0.328477	-1.05542
3.2156	42.229	2.38104	2.16119		1.14667	-27.5856	1.01632	-0.530993		1.84787	-54.3648	1.07661	-1.50184		2.37398	11.0456	2.33	0.454829		1.70424	-149.817	-1.47318	-0.856832
2.59621	77.1047	0.579395	2.53073		2.42688	-10.2503	2.38815	-0.431861		1.61379	-100.046	-0.281513	-1.58905		1.85939	37.403	1.47707	1.12943		1.42793	-13.6375	1.38768	-0.336676
1.61122	-177.513	-1.6097	-0.0699054		0.414254	-178.501	-0.414112	-0.0108366		2.55325	-27.9288	2.25587	-1.19587		2.08967	61.5134	0.996673	1.83667		2.25653	173.707	-2.24293	0.247343
0.6926	11.6048	0.678443	0.139323		2.31977	4.08929	2.31387	0.165425		0.959795	-129.199	-0.606611	-0.743795		2.39174	86.2677	0.15569	2.38667		0.840095	19.6082	0.791378	0.281924
2.02529	165.552	-1.96124	0.505329		3.11284	5.79423	3.09694	0.314261		0.549155	-70.6294	0.182142	-0.518069		3.34389	-86.9741	0.176515	-3.33923		2.3912	154.822	-2.16402	1.01727
1.2994	36.2848	1.04743	0.768986		0.607364	125.793	-0.355218	0.492658		0.475	54.151	0.278184	0.385018		3.83644	-110.049	-1.31525	-3.60394		0.870837	-31.2002	0.744882	-0.451119
1.1665	87.0264	0.0605124	1.16493		1.91386	12.9862	1.86491	0.430075		1.92494	15.6635	1.85346	0.519709		3.42249	-122.431	-1.83541	-2.88872		0.318431	-152.327	-0.282006	-0.147888
1.8892	95.095	-0.167774	1.88174		1.04094	98.5097	-0.154034	1.02948		1.48611	142.92	-1.1856	0.896025		2.60116	-77.458	0.564855	-2.53909		2.85911	36.8518	2.28783	1.71474
2.12771	63.0339	0.964838	1.89637		2.06803	36.3844	1.66488	1.22675		1.23299	51.8189	0.762172	0.969206		2.21239	-116.587	-0.990154	-1.97845		2.25951	90.4864	-0.0191817	2.25943
2.34856	91.0866	-0.0445353	2.34813		1.4864	119.823	-0.73921	1.28955		1.44269	85.2088	0.1205	1.43765		2.59269	-46.502	1.78463	-1.88073		0.598042	30.9296	0.513	0.307384
1.89862	-38.958	1.47638	-1.19376		2.97387	30.8166	2.55399	1.52349		2.87913	39.4426	2.22344	1.82913		2.20575	-64.8265	0.938239	-1.99625		2.00572	18.3035	1.90425	0.629897
2.03762	-30.2985	1.7593	-1.02799		1.53292	30.2564	1.32411	0.772396		2.01255	114.793	-0.843953	1.82705		2.29366	-137.035	-1.67844	-1.56325		1.22579	59.4208	0.623596	1.05532
0.784027	-32.7841	0.659145	-0.424531		1.79303	135.917	-1.28799	1.24742		3.08914	64.4682	1.33146	2.78747		3.06764	-168.472	-3.00576	-0.613041		2.01269	36.3346	1.62136	1.19252
0.636034	-109.094	-0.208062	-0.60104		1.36846	113.572	-0.547256	1.25427		3.32657	111.134	-1.19942	3.10281		1.83522	-158.317	-1.70537	-0.678061		3.26081	-34.9752	2.67191	-1.86917
1.74463	-22.4438	1.61248	-0.66606		1.84875	61.5845	0.879751	1.62602		1.66156	-39.7833	1.27686	-1.06321		1.44456	-9.3929	1.42519	-0.235757		2.02904	-25.2265	1.83553	-0.864771
1.91607	-9.98034	1.88707	-0.332074		2.25343	122.815	-1.22118	1.89384		0.724559	-21.0718	0.676109	-0.260507		0.635944	-1.92196	0.635586	-0.0213284		2.38024	-7.42456	2.36028	-0.307576
1.38078	-176.642	-1.37841	-0.0808843		1.93079	98.7336	-0.293172	1.9084		2.16011	-6.6888	2.1454	-0.251602		2.34285	167.87	-2.29054	0.492291		0.0815638	40.4801	0.06204	0.0529499
1.87321	10.9323	1.83921	0.355252		2.24226	118.331	-1.06409	1.97369		2.26242	3.95907	2.25702	0.156206		1.49	161.19	-1.41042	0.480414		2.88155	13.9788	2.79621	0.696076
1.78775	37.0999	1.42588	1.07838		2.46812	56.9343	1.34661	2.0684		0.688158	126.649	-0.410767	0.552115		1.95989	157.71	-1.81344	0.743365		1.22359	73.2918	0.35178	1.17193
1.93028	132.876	-1.31339	1.41456		1.2977	-26.3004	1.16336	-0.574981		0.793238	30.9908	0.680003	0.408439		3.01014	157.879	-2.78858	1.13349		2.30743	37.2604	1.83646	1.39701
1.75455	58.473	0.917454	1.49557		0.292155	-86.3537	0.01858	-0.291563		2.42882	20.5704	2.27396	0.853388		1.035	-4.89294	1.03123	-0.0882796		1.32133	-22.7341	1.21868	-0.510636
2.01495	71.7364	0.631464	1.91344		1.19007	155.925	-1.08655	0.485479		0.826384	78.4586	0.165339	0.809675		0.612319	151.572	-0.538484	0.291497		2.45283	-4.32114	2.44586	-0.184813
2.27799	60.1467	1.13394	1.97571		2.33267	12.7925	2.27477	0.516501		2.10973	39.439	1.62935	1.34022		1.08478	108.771	-0.349073	1.02708		0.486222	148.95	-0.416554	0.25079
2.25863	101.704	-0.458166	2.21167		1.66115	138.279	-1.23987	1.1055		2.19328	81.0241	0.342195	2.16642		1.76262	38.2457	1.3843	1.09113		3.17526	6.60367	3.1542	0.365158
2.69761	113.932	-1.09428	2.46569		0.893164	101.383	-0.176275	0.875596		2.87894	54.3033	1.67984	2.33804		1.46782	125.701	-0.856549	1.19198		1.89773	12.6334	1.85179	0.415056
2.68523	-72.1884	0.821383	-2.55652		1.40727	55.079	0.805588	1.15388		2.97308	62.3977	1.37752	2.6347		2.52333	64.4756	1.08729	2.27705		1.34972	19.1758	1.27483	0.443338
3.63484	-40.5842	2.76048	-2.3647		1.83239	39.234	1.41931	1.15897		3.01333	75.8214	0.7381	2.92154		2.72797	96.9258	-0.328947	2.70806		1.17017	47.3765	0.792414	0.861034
2.80319	-41.8758	2.08724	-1.87118		1.46833	80.0573	0.253526	1.44628		2.23032	168.953	-2.18899	0.427368		1.65095	-70.7866	0.543307	-1.55899		0.384287	-70.3384	0.129299	-0.361881
1.56672	-99.3101	-0.253461	-1.54608		1.74133	68.7565	0.630941	1.623		1.22517	172.152	-1.2137	0.16729		1.41472	-119.287	-0.692064	-1.23389		2.46199	-167.942	-2.40767	-0.514321
1.24197	-55.8367	0.69743	-1.02765		2.01543	94.6314	-0.162736	2.00885		3.04777	166.964	-2.96922	0.687446		1.89869	-8.48685	1.8779	-0.280213		0.948966	-17.5562	0.904764	-0.286247
0.974519	-113.174	-0.3835	-0.895888		3.00083	52.714	1.81789	2.38753		1.03233	135.213	-0.732672	0.727249		0.829125	142.993	-0.662111	0.499057		2.17908	1.33936	2.17848	0.050934
0.918287	-2.46342	0.917439	-0.0394694		1.75959	-151.455	-1.54569	-0.84082		2.24192	147.951	-1.90024	1.18965		1.31804	8.07438	1.30497	0.185129		0.852737	143.086	-0.681797	0.512165
2.11024	-9.34868	2.08221	-0.342792		2.38241	-167.498	-2.32593	-0.515723		1.54019	80.3826	0.257317	1.51854		1.26325	123.611	-0.699272	1.05205		2.95127	12.3898	2.88253	0.633227
0.653716	137.564	-0.482461	0.441107		2.86509	172.107	-2.83795	0.393424		3.62134	138.632	-2.71776	2.3933		2.3592	-81.4927	0.349007	-2.33324		1.7184	22.3054	1.58982	0.652208
1.44212	-91.2191	-0.0306833	-1.44179		2.21176	173.131	-2.19589	0.264511		3.23718	129.384	-2.05406	2.50204		1.75587	-86.8632	0.0960827	-1.75324		1.23193	32.681	1.03691	0.665197
0.665873	-70.8995	0.217892	-0.629214		3.74475	155.484	-3.40713	1.5539		0.235647	-29.1825	0.205737	-0.1149		2.55421	-41.3583	1.91717	-1.68774		1.22906	62.1234	0.574671	1.08644
0.383948	-18.1196	0.364908	-0.119409		4.06312	140.596	-3.13953	2.57921		1.45619	53.9441	0.857075	1.17725		1.53813	-68.3336	0.567883	-1.42946		0.516083	-67.8432	0.194637	-0.477973
0.693682	152.838	-0.61718	0.316675		2.11997	-53.213	1.26953	-1.69781		1.58626	120.107	-0.795699	1.37225		2.96771	-8.04353	2.93852	-0.415258		0.149551	33.1798	0.125168	0.0818448
0.50111	107.571	-0.151276	0.477731		3.44336	-29.5925	2.9942	-1.70043		1.94422	44.9062	1.37702	1.37252		1.03528	-131.093	-0.680463	-0.780234		1.92936	167.135	-1.88092	0.429593
0.891085	52.8537	0.538083	0.710281		1.70565	-57.614	0.913579	-1.44035		1.76275	57.7976	0.939392	1.49159		0.851122	-83.2681	0.0997713	-0.845254		0.924792	23.6721	0.846978	0.371306
1.23136	35.0293	1.00831	0.706792		3.62912	-15.9411	3.48956	-0.996737		2.71075	-114.709	-1.13311	-2.46256		0.539861	-111.06	-0.193993	-0.503802		2.40178	156.707	-2.20602	0.949749
1.63433	135.929	-1.17422	1.13677		1.61903	-43.6168	1.17213	-1.11686		3.66856	-144.801	-2.99779	-2.11461		0.542286	-40.5085	0.412305	-0.352248		0.822665	71.9988	0.254234	0.782396
1.71978	79.1992	0.32228	1.68932		2.04853	-28.3771	1.80238	-0.97361		1.48855	-100.332	-0.266974	-1.46442		0.754134	150.174	-0.65424	0.375083		1.27272	42.5821	0.937115	0.861183
1.34749	-39.2205	1.04392	-0.852026		2.64058	-16.8793	2.52682	-0.766709		3.99198	-168.231	-3.90807	-0.814222		1.50081	11.9944	1.46805	0.311893		1.21096	60.5482	0.595418	1.05447
0.458799	8.26233	0.454037	0.0659319		0.263571	-1.08547	0.263523	-0.00499308		4.10432	-178.618	-4.10312	-0.099007		3.73503	-126.051	-2.19806	-3.01976		1.45681	96.5243	-0.16553	1.44737
0.230899	51.8924	0.142497	0.181683		2.21399	-0.249351	2.21397	-0.00963527		0.0992468	-93.9843	-0.00689601	-0.099007		2.97548	-52.8217	1.79807	-2.37074		2.19986	68.9737	0.789302	2.05339
1.1308	137.237	-0.830203	0.767773		3.64441	-1.1374	3.64369	-0.072342		2.28503	166.042	-2.21756	0.551188		2.82677	-114.35	-1.16552	-2.5753		1.68952	177.361	-1.68773	0.0778011
1.38831	43.3778	1.00908	0.9535		2.6352	16.0984	2.53187	0.730709		1.6195	143.3	-1.29848	0.967852		2.27288	-94.5693	-0.181068	-2.26566		0.662982	162.202	-0.631252	0.202651
2.34285	49.6938	1.51552	1.78665		1.0304	83.4449	0.117629	1.02366		0.627254	115.756	-0.272564	0.564939		2.00299	-122.587	-1.07877	-1.68767		1.34083	128.66	-0.837607	1.04701
2.63903	112.29	-1.00097	2.44183		1.79481	-104.036	-0.435305	-1.74122		0.725974	54.4549	0.42204	0.590694		2.95928	-144.224	-2.40089	-1.73005		1.1652	51.5389	0.724732	0.912383
2.9331	57.8702	1.55994	2.48388		1.97105	-68.301	0.72876	-1.83138		0.913098	-119.575	-0.45067	-0.794131		1.70532	-68.5251	0.624307	-1.58694		3.34754	142.704	-2.66302	2.02839
2.55756	-114.152	-1.04646	-2.33368		1.45761	-112.556	-0.559115	-1.34612		0.85156	-146.579	-0.710748	-0.469034		0.920873	-100.617	-0.169659	-0.90511		2.37527	123.892	-1.32454	1.97168
2.10741	-92.2187	-0.081588	-2.10583		0.876127	-109.998	-0.29962	-0.823302		0.46633	21.682	0.433336	0.172288		1.96351	-36.9435	1.5693	-1.18012		2.50507	78.4367	0.502142	2.45423
1.42032	-77.552	0.306153	-1.38693		1.12599	-68.9922	0.403663	-1.05115		0.782085	132.385	-0.527208	0.577675		2.43713	-158.713	-2.27085	-0.884792		2.17462	-88.4129	0.0602291	-2.17379
0.60844	-43.9715	0.437885	-0.42244		0.760769	-119.669	-0.376571	-0.661032		2.23642	156.648	-2.05323	0.886476		2.00189	-147.356	-1.68567	-1.07985		2.32538	-111.308	-0.845018	-2.16641
3.68742	2.5174	3.68387	0.161962		0.321202	-140.133	-0.246532	-0.205895		1.20093	52.098	0.737744	0.947605		1.23226	-36.976	0.98444	-0.741182		2.57607	-150.976	-2.25255	-1.24986
0.192786	99.5582	-0.0320119	0.19011		0.398981	115.829	-0.17383	0.359122		1.96468	136.535	-1.42596	1.35151		0.537536	-26.9223	0.479279	-0.243386		1.27772	-117.407	-0.588141	-1.13431
1.8549	172.611	-1.83949	0.238561		0.898036	-154.826	-0.812744	-0.38199		1.75302	75.7567	0.431312	1.69913		2.3438	-127.096	-1.41367	-1.86948		1.10137	-57.8746	0.585678	-0.932733
1.41042	159.296	-1.31933	0.498639		1.40473	174.355	-1.39792	0.138166		2.26851	105.51	-0.606625	2.1859		1.8573	-56.7027	1.01963	-1.55239		0.670294	-141.301	-0.523122	-0.419091
1.89054	140.054	-1.44937	1.21385		2.90577	172.163	-2.87863	0.396216		0.0329371	81.4902	0.00487399	0.0325745		1.60927	-108.054	-0.498724	-1.53004		2.74354	173.818	-2.72758	0.295452
0.644025	115.226	-0.27448	0.582605		0.473419	86.8636	0.0259019	0.47271		1.5241	-179.383	-1.52401	-0.0164068		0.920282	-36.3387	0.741313	-0.54532		1.41523	162.701	-1.35122	0.420819
3.53985	24.3945	3.22382	1.46202		1.04034	121.038	-0.536412	0.891391		1.9346	161.081	-1.83009	0.62727		0.714373	-73.1447	0.207137	-0.683683		1.2064	87.4647	0.0533648	1.20522
3.03839	36.4445	2.44418	1.80494		2.01011	135.461	-1.43275	1.40988		0.614083	51.907	0.378853	0.48329		1.23169	-171.645	-1.21861	-0.178971		0.764654	-87.3558	0.0352756	-0.76384
2.62471	-63.623	1.16609	-2.35145		1.11393	91.6724	-0.0325098	1.11346		3.37716	153.883	-3.03235	1.48663		1.47121	-16.8768	1.40785	-0.427115		0.546083	-174.844	-0.543874	-0.0490713
2.56427	-41.2854	1.92687	-1.69193		1.34083	86.4421	0.083207	1.33825		3.90944	-59.0684	2.00951	-3.35345		0.458114	42.0349	0.340258	0.306745		1.21265	3.01599	1.21097	0.0638029
1.45991	-71.8848	0.453929	-1.38755		1.85193	96.4159	-0.206945	1.84033		2.67719	-92.1733	-0.101523	-2.67527		1.70023	113.895	-0.688688	1.55451		1.40073	105.313	-0.369917	1.351
1.55136	-42.2936	1.14755	-1.04395		5.39668	-122.794	-2.92292	-4.53659		3.6868	-36.2633	2.97269	-2.18073		2.38143	4.71042	2.37338	0.195562		3.20367	-175.243	-3.19263	-0.265701
2.08763	-160.094	-1.96289	-0.710796		4.37223	-90.8069	-0.0615746	-4.37179		1.55262	-65.7494	0.637706	-1.41562		2.56702	13.6522	2.49449	0.605889		2.67248	178.727	-2.67182	0.0593817
1.61646	-26.6164	1.44516	-0.7242		4.53125	-105.409	-1.20397	-4.36837		1.65124	-123.611	-0.914033	-1.37518		1.36891	112.84	-0.531356	1.26158		0.368654	96.347	-0.0407549	0.366394
1.75827	18.0591	1.67166	0.545061		4.8487	-119.706	-2.40277	-4.21149		2.37513	-32.2024	2.00976	-1.26573		0.873778	79.0207	0.166414	0.857784		3.56515	169.617	-3.50677	0.642563
1.31289	131.447	-0.869043	0.984102		4.09208	-78.2599	0.832627	-4.00648		2.184	-17.7705	2.07979	-0.666566		1.27306	-167.361	-1.24221	-0.278557		1.10204	87.5432	0.0472399	1.10103
1.98365	-43.2626	1.44453	-1.35948		3.46037	-105.085	-0.900551	-3.34113		1.06596	-162.243	-1.01518	-0.325098		2.60896	-178.166	-2.60762	-0.0834987		2.94072	151.346	-2.58058	1.41012
1.09297	-89.3701	0.0120156	-1.0929		4.28244	-129.568	-2.72786	-3.30122		2.65344	172.982	-2.63356	0.324223		1.66088	169.361	-1.63233	0.306618		3.87084	151.432	-3.39958	1.85101
1.0829	-4.82675	1.07906	-0.0911182		3.4279	-100.884	-0.64724	-3.36624		1.86845	-26.0044	1.67929	-0.819204		0.948336	44.5256	0.676104	0.664999		2.48961	127.062	-1.50043	1.98667
1.96478	-1.45269	1.96415	-0.0498101		3.6261	-56.1467	2.01999	-3.01136		2.69713	-10.8928	2.64854	-0.509684		1.3342	137.581	-0.984953	0.899977		4.37425	148.28	-3.72084	2.29987
1.26953	27.4979	1.12611	0.586161		3.04114	-86.3524	0.193476	-3.03498		0.609691	18.3334	0.578744	0.191776		2.6332	157.587	-2.43429	1.00398		3.78951	131.836	-2.52758	2.82342
1.4474	148.32	-1.23173	0.760139		3.52997	-132.896	-2.40277	-2.586		2.85106	14.0943	2.76523	0.694283		1.16715	75.3437	0.295312	1.12917		1.63458	-154.618	-1.47679	-0.700674
1.18036	104.594	-0.297414	1.14227		3.25609	-43.9704	2.3434	-2.26066		1.23643	71.6218	0.389831	1.17337		2.79149	144.853	-2.28253	1.60701		1.51459	-12.3934	1.47929	-0.325064
1.42571	49.8256	0.91975	1.08936		2.2918	-40.7736	1.73557	-1.49671		3.33079	29.2086	2.90728	1.6254		1.67082	69.2233	0.592683	1.56216		1.2168	179.315	-1.21672	0.0145402
2.42356	82.7839	0.304429	2.40436		2.30184	-122.961	-1.25237	-1.93133		3.14988	41.1859	2.37052	2.07421		2.00269	104.336	-0.495869	1.94033		0.864031	4.89525	0.86088	0.0737316
2.70222	105.253	-0.710907	2.60703		1.8113	-51.0211	1.13937	-1.40806		2.40627	73.4596	0.685044	2.30669		2.28408	109.643	-0.767829	2.15116		0.696711	178.804	-0.696559	0.0145402
3.0519	59.1436	1.56529	2.61992		1.02779	-70.1791	0.348502	-0.966897		2.84402	61.8789	1.34049	2.50829		2.57185	99.6662	-0.431833	2.53534		0.35284	8.39948	0.349055	0.0515407
1.40242	-109.908	-0.477536	-1.31862		1.78565	-36.0475	1.44375	-1.05078		1.69594	-121.078	-0.875465	-1.45251		3.12722	117.361	-1.43727	2.77736		2.11462	154.42	-1.90734	0.913043
2.27025	-145.711	-1.87569	-1.27899		3.98024	-63.9888	1.74552	-3.57707		2.17254	-35.4247	1.77035	-1.25927		4.18101	117.126	-1.90636	3.72111		0.877704	96.0276	-0.0921658	0.872851
0.737551	-100.301	-0.131886	-0.725663		4.1578	-56.9131	2.26978	-3.48358		1.98581	-20.4775	1.86033	-0.694717		3.77092	105.339	-0.99749	3.6366		0.872557	67.5608	0.333058	0.806491
2.20336	165.772	-2.13577	0.541555		3.02483	-81.5376	0.445134	-2.9919		1.57217	-10.0452	1.54807	-0.274226		2.12311	-129.559	-1.35215	-1.63685		1.56177	129.848	-1.00071	1.19904
0.813752	70.2244	0.275322	0.765761		3.15213	-57.7826	1.6805	-2.6668		2.38542	-8.54805	2.35892	-0.354566		1.31169	-146.363	-1.09208	-0.726577		1.45902	63.1046	0.660008	1.3012
1.76727	128.306	-1.09546	1.38681		2.12751	-52.6614	1.29039	-1.69151		2.5316	16.8348	2.42311	0.733183		3.75826	177.201	-3.75378	0.183496		2.1967	37.1921	1.74992	1.32788
1.70783	-96.6767	-0.198564	-1.69624		2.66024	-42.337	1.96644	-1.79164		0.903366	31.6749	0.768802	0.474357		1.09467	159.757	-1.02706	0.378754		2.64707	76.9992	0.595496	2.57922
1.56741	-71.0723	0.508428	-1.48266		2.61284	-29.1776	2.2813	-1.27381		1.46702	-139.314	-1.11242	-0.956378		3.3417	167.97	-3.26831	0.696514		2.66352	-42.0365	1.97824	-1.7835
1.519	-112.289	-0.576116	-1.40551		0.85007	-113.216	-0.335101	-0.781234		0.740834	-68.9515	0.266076	-0.691403		2.53916	164.018	-2.44101	0.699135		0.906937	-51.6177	0.563122	-0.710935
0.697586	-138.649	-0.523662	-0.460874		1.27201	-21.0318	1.18727	-0.456508		1.64575	-162.268	-1.56756	-0.501241		1.68896	93.8306	-0.112834	1.68518		2.87827	-7.38925	2.85436	-0.370172
0.0854303	59.0447	0.0439428	0.0732623		0.637342	-38.4159	0.49937	-0.396022		0.641885	14.3211	0.621938	0.158774		1.51865	167.741	-1.48402	0.322449		0.528009	-19.2824	0.498389	-0.174361
0.610416	103.307	-0.1405	0.594026		1.67653	-69.9125	0.575813	-1.57455		0.202466	108.625	-0.064661	0.191863		1.19591	126.897	-0.717996	0.95639		1.00992	8.63258	0.998475	0.151586
2.24036	23.1083	2.0606	0.879275		0.804316	-103.287	-0.184859	-0.782784		0.94967	56.2477	0.52764	0.7896		2.53968	137.057	-1.85913	1.73021		2.90694	8.1673	2.87745	0.412971
1.98397	32.2735	1.67746	1.05936		1.02798	-15.5113	0.99054	-0.274912		0.875384	-178.06	-0.874883	-0.0296291		1.86006	120.001	-0.93006	1.61084		0.69884	32.4392	0.589794	0.37486
1.48077	107.112	-0.435708	1.41522		0.565973	-23.8029	0.517831	-0.228422		1.7854	170.602	-1.76144	0.291543		3.10565	-177.315	-3.10224	-0.145481		0.65556	66.8915	0.25729	0.60296
2.07489	84.0577	0.214806	2.06374		0.21144	-26.2724	0.189598	-0.0935915		2.92414	-85.153	0.247074	-2.91369		2.4521	178.842	-2.4516	0.0495682		2.70509	23.5408	2.47996	1.08042
2.35023	67.9852	0.880975	2.17887		1.44626	4.83992	1.4411	0.122024		1.90364	-98.0191	-0.265563	-1.88503		1.80253	178.424	-1.80185	0.0495774		0.872471	-119.389	-0.42816	-0.760188
2.80353	-54.5344	1.62665	-2.28338		2.1904	13.1195	2.13323	0.497183		2.22498	-57.6292	1.19125	-1.87922		3.23266	177.969	-3.23063	0.114538		1.94666	36.1148	1.57258	1.14737
2.56525	-30.7018	2.2057	-1.30974		1.60727	26.3414	1.44038	0.713173		3.2783	-58.9194	1.6924	-2.80767		0.18776	42.0097	0.139511	0.125659		1.7737	104.139	-0.433269	1.71997
2.9341	-20.0876	2.75562	-1.00774		2.62016	19.6229	2.46799	0.879923		4.26009	-42.9115	3.12011	-2.90056		1.05722	29.8205	0.917231	0.525739		2.15914	57.9542	1.14563	1.83014
2.70503	-6.72658	2.68641	-0.316844		1.23404	89.5497	0.00969745	1.234		3.63282	-48.1624	2.42317	-2.70659		3.1887	158.765	-2.9722	1.15491		1.27656	-70.9558	0.41654	-1.20669
0.82294	173.616	-0.817837	0.0915062		1.70104	-84.1531	0.173286	-1.69219		2.75066	-49.4602	1.78786	-2.09038		1.25137	71.4861	0.397355	1.18661		1.63244	-127.491	-0.99357	-1.29525
0.101268	58.2587	0.0532755	0.0861216		1.67362	-113.85	-0.676732	-1.5307		3.5793	-36.9917	2.85887	-2.15366		2.75357	147.487	-2.32201	1.48001		1.41513	169.649	-1.3921	0.254255
2.05042	8.47354	2.02804	0.302135		1.76869	-140.924	-1.37306	-1.11489		2.76747	-57.9715	1.4677	-2.34622		1.67571	91.5842	-0.0463264	1.67507		1.68162	146.363	-1.40005	0.931501
0.67231	21.2571	0.626568	0.243748		0.673971	-101.788	-0.137688	-0.659757		4.34234	-28.3059	3.82312	-2.05905		2.45868	69.2758	0.870054	2.29959		1.91152	-93.9706	-0.132361	-1.90693
1.25378	37.4482	0.995382	0.762356		0.737064	-40.496	0.560501	-0.478646		1.44566	-81.201	0.22114	-1.42865		2.46714	95.4708	-0.235215	2.4559		2.23622	-50.9704	1.4082	-1.73714
0.22753	33.7816	0.189115	0.126514		0.562777	-55.6619	0.317448	-0.464698		1.24908	-155.112	-1.13308	-0.525675		1.97118	-39.0566	1.53067	-1.24202		1.38678	-87.4114	0.0626335	-1.38536
1.35667	147.089	-1.13894	0.737131		1.37309	-179.601	-1.37306	-0.00956169		3.11081	-7.82205	3.08187	-0.423372		1.48956	-53.1614	0.893086	-1.19214		0.0864143	-50.8599	0.0545463	-0.0670233
2.10851	130.339	-1.36485	1.60717		0.913355	-4.40736	0.910654	-0.0701888		0.494922	-50.1849	0.316904	-0.380157		1.18086	-42.5767	0.869554	-0.798942		1.9994	-15.801	1.92385	-0.54443
2.33071	-63.2925	1.0475	-2.08205		0.0732952	-172.504	-0.0726689	-0.00956169		0.739541	32.8226	0.621475	0.400861		2.48245	-21.3683	2.3118	-0.904507		0.801601	154.769	-0.725128	0.341692
1.90092	-86.7535	0.107653	-1.89787		0.803412	26.2237	0.720722	0.355009		1.03963	116.481	-0.463577	0.930548		0.608486	-71.543	0.192643	-0.577187		1.57633	9.76203	1.5535	0.267276
0.426036	2.19007	0.425724	0.0162808		1.77326	163.265	-1.69816	0.510594		2.0957	30.3691	1.80814	1.05952		2.82364	3.46472	2.81848	0.170644		3.26261	22.4761	3.01478	1.24729
2.22837	-23.6581	2.04109	-0.894197		1.72883	-106.833	-0.50065	-1.65475		1.44373	75.7314	0.355832	1.39919		0.845721	105.68	-0.228562	0.814251		1.45161	-159.705	-1.3615	-0.503489
2.16497	-6.9115	2.14924	-0.260525		1.01562	-77.9432	0.212144	-0.993218		2.50775	-89.1819	0.0358078	-2.50749		0.870612	58.515	0.454699	0.742438		2.88999	162.898	-2.7622	0.849881
0.867445	-174.806	-0.863883	-0.0785348		1.17502	-105.074	-0.305592	-1.13459		2.41155	-107.845	-0.738985	-2.29553		0.558449	122.216	-0.297714	0.472473		1.32943	122.565	-0.715574	1.12042
2.46448	4.1252	2.45809	0.177285		1.46025	-45.2339	1.02833	-1.03676		2.47405	-18.9311	2.34023	-0.802657		1.24824	126.972	-0.75073	0.997248		1.92676	104.832	-0.493212	1.86256
0.442014	86.2176	0.0291585	0.441051		1.23279	-41.0438	0.929779	-0.809493		1.74548	-25.4137	1.57658	-0.749074		1.74889	132.066	-1.17172	1.29834		3.90384	142.956	-3.11595	2.35176
1.77115	104.202	-0.434532	1.71702		0.292895	-86.8493	0.0160983	-0.292452		0.663393	-45.0393	0.468768	-0.469412		1.3244	98.1985	-0.188864	1.31086		3.68631	-66.9946	1.44068	-3.39313
2.11074	47.2248	1.43345	1.54933		0.501926	161.677	-0.476477	0.157794		3.53928	-132.173	-2.37615	-2.62305		1.75347	90.0447	-0.00136883	1.75347		3.49869	-119.592	-1.72771	-3.04234
1.00073	-48.2734	0.666061	-0.746873		2.56909	-109.753	-0.868281	-2.41791		3.12204	-172.351	-3.09425	-0.415573		2.44194	110.77	-0.865965	2.28323		3.01648	-88.6811	0.0694284	-3.01568
0.846134	-102.209	-0.178932	-0.826998		2.3904	-125.275	-1.38046	-1.9515		1.53033	156.958	-1.40823	0.59899		3.31111	133.492	-2.2789	2.4021		2.07647	-100.663	-0.384206	-2.04061
2.1425	-20.5607	2.00603	-0.752445		2.02801	-115.35	-0.868281	-1.83274		1.49821	124.724	-0.853411	1.23139		2.59873	88.6638	0.0606009	2.59802		1.91513	-127.447	-1.16444	-1.52046
0.0921973	18.0176	0.0876761	0.0285175		1.78231	-141.17	-1.38844	-1.11752		2.52578	143.227	-2.02319	1.51203		3.25921	84.4207	0.316873	3.24377		2.85459	-35.4261	2.3261	-1.65467
1.20728	141.642	-0.946677	0.749211		1.35874	-133.384	-0.933301	-0.987484		2.09347	-51.7311	1.2966	-1.64361		2.12338	173.071	-2.10787	0.256154		0.273055	-12.0562	0.267033	-0.0570333
0.807729	112.032	-0.303003	0.748743		1.79432	-162.741	-1.71353	-0.532347		1.53123	-30.7783	1.31556	-0.783557		2.19204	145.949	-1.81619	1.2274		0.786673	58.8336	0.407123	0.673131
2.03258	63.6941	0.900764	1.82209		1.33454	-153.409	-1.19338	-0.597367		1.31245	-12.9841	1.2789	-0.294884		1.86467	138.635	-1.39947	1.23227		2.1548	18.0823	2.04838	0.668813
1.66205	-144.311	-1.34991	-0.969622		0.784271	-149.138	-0.673223	-0.402308		2.23444	-5.84177	2.22284	-0.227425		2.53798	93.7071	-0.164097	2.53266		1.94669	114.805	-0.816709	1.76709
2.57224	-161.122	-2.43387	-0.832276		0.302316	-7.82061	0.299504	-0.0411367		0.964142	1.44606	0.963835	0.0243309		1.24639	-57.961	0.661207	-1.05655		0.9218	20.7756	0.861862	0.32697
1.19105	115.846	-0.519245	1.07191		0.757304	12.5388	0.739242	0.164411		0.975094	123.375	-0.536411	0.814292		0.735798	135.211	-0.522201	0.518368		2.49275	10.078	2.45429	0.436206
3.34424	158.217	-3.10544	1.24104		2.03252	143.065	-1.62463	1.22136		3.59411	19.5647	3.3866	1.20357		0.367999	93.9576	-0.0253984	0.367122		1.47384	137.406	-1.085	0.997487
3.79858	154.57	-3.43053	1.63116		2.67682	-106.404	-0.755958	-2.56786		2.91421	26.7244	2.60292	1.31052		0.856748	119.635	-0.423643	0.744677		3.15189	48.3792	2.09348	2.35622
3.24201	141.097	-2.52296	2.036		1.70504	-129.876	-1.09314	-1.30852		1.46458	75.7536	0.36042	1.41954		1.10898	49.1801	0.724919	0.839237		1.11346	-119.854	-0.554265	-0.9657
0.890457	-18.8641	0.842629	-0.287906		1.19258	-98.8204	-0.182867	-1.17848		1.08901	-95.2382	-0.0994232	-1.08446		1.17165	69.6184	0.408053	1.0983		1.73636	-162.9	-1.6596	-0.510563
0.26991	-16.889	0.258269	-0.0784137		2.23271	-162.851	-2.13345	-0.658322		1.59452	-48.336	1.05997	-1.19119		1.20028	80.7747	0.192426	1.18476		0.201028	0.583968	0.201017	0.00204887
1.84405	-1.64126	1.84329	-0.0528164		0.583551	-115.137	-0.247887	-0.528283		1.28988	-26.2401	1.15696	-0.570302		1.44024	103.801	-0.34358	1.39865		1.23248	74.9887	0.319224	1.19042
1.61699	19.903	1.52041	0.550469		1.78824	-167.132	-1.74334	-0.398244		1.53587	-150.743	-1.33995	-0.750621		2.73026	33.1186	2.28671	1.49175		1.96219	-19.6405	1.84803	-0.659526
0.875216	109.379	-0.290411	0.825629		0.70307	-179.338	-0.703023	-0.00812744		0.77868	-29.0367	0.680807	-0.377947		2.48022	49.5866	1.60792	1.8884		2.61717	-8.00887	2.59165	-0.364641
1.30808	76.3846	0.307926	1.27132		1.08195	-168.977	-1.06199	-0.20688		1.47042	-178.62	-1.46999	-0.0354061		2.7001	85.1953	0.226161	2.69061		0.104868	8.99287	0.103579	0.016392
2.87098	33.5308	2.39322	1.58588		2.49244	177.284	-2.48964	0.118086		1.39132	3.28063	1.38904	0.0796203		3.13368	-65.1935	1.31475	-2.84453		2.18685	17.4082	2.08669	0.654255
2.02226	83.1297	0.241906	2.00774		2.90399	164.745	-2.80166	0.764089		0.876507	119.486	-0.43143	0.762976		2.45976	-71.4063	0.78431	-2.33137		0.612236	39.9369	0.469433	0.39302
2.34141	102.805	-0.518945	2.28318		2.22659	156.202	-2.03728	0.898451		0.92241	30.4355	0.795301	0.467264		3.34691	-48.1554	2.23277	-2.49331		1.27471	146.83	-1.067	0.69742
2.77058	71.5778	0.875551	2.6286		1.57032	132.51	-1.0611	1.15757		1.54811	28.8831	1.35554	0.747775		2.59847	-110.545	-0.911906	-2.4332		1.24534	-21.2638	1.16056	-0.451639
0.9499	-48.7452	0.626372	-0.714121		3.88143	151.16	-3.40001	1.87227		2.22947	153.209	-1.99015	1.00491		2.52739	-48.0943	1.68806	-1.881		1.96475	49.7082	1.27057	1.49864
1.20472	-41.9838	0.895508	-0.80586		2.04165	116.452	-0.909456	1.8279		1.78165	-83.1336	0.213005	-1.76887		3.3089	-27.052	2.94688	-1.50488		1.62975	94.1927	-0.119152	1.62539
1.05143	-19.2918	0.992391	-0.34737		2.60444	122.677	-1.40615	2.19222		1.14502	-51.5192	0.712491	-0.896339		2.12983	-125.499	-1.23675	-1.73395		2.50869	-83.5541	0.28164	-2.49283
1.67952	4.37029	1.67464	0.127983		3.37274	134.64	-2.36985	2.39983		2.29049	-157.645	-2.11835	-0.871168		3.23251	-32.8273	2.7163	-1.75237		0.702179	-70.2887	0.236831	-0.661034
0.503169	137.496	-0.370953	0.33996		1.21881	-125.931	-0.715215	-0.986903		0.483122	-2.42284	0.48269	-0.0204234		1.19807	-106.223	-0.334718	-1.15036		1.67038	-36.8216	1.33715	-1.0011
1.55173	22.0277	1.43846	0.581983		0.726825	-80.674	0.117784	-0.717218		2.38005	155.08	-2.15847	1.00283		1.68205	-64.7334	0.717952	-1.52113		1.93953	-165.273	-1.87581	-0.493065
1.18819	133.967	-0.824896	0.855186		0.913493	-175.188	-0.910273	-0.0766301		0.646431	88.459	0.0173844	0.646197		2.70048	-14.9446	2.60914	-0.696412		0.446207	168.315	-0.43696	0.0903688
1.55612	109.679	-0.52402	1.46523		0.752343	149.794	-0.650195	0.378506		2.82088	-86.0258	0.195508	-2.8141		0.912511	-51.2907	0.570657	-0.712058		0.666345	26.084	0.598478	0.292984
2.09117	44.8132	1.48349	1.47385		0.819394	23.0905	0.75375	0.321353		3.6504	-46.6408	2.50625	-2.65407		0.971337	-152.269	-0.859772	-0.45198		2.48684	-138.759	-1.86998	-1.63938
2.73482	45.7945	1.90681	1.96044		0.605826	71.2178	0.195059	0.573565		2.29604	-57.4658	1.23482	-1.93573		2.65684	-111.053	-0.954409	-2.4795		2.57046	-159.961	-2.41484	-0.880802
2.32787	91.7004	-0.0690766	2.32684		1.58984	-91.7811	-0.0494148	-1.58908		2.77409	-27.5254	2.46008	-1.28202		3.21699	-125.504	-1.86828	-2.61889		1.08937	-136.435	-0.789349	-0.750763
1.51639	-149.693	-1.30914	-0.76523		0.99114	-20.908	0.925878	-0.353706		1.21326	-35.8852	0.982974	-0.711169		2.12118	-98.3439	-0.307814	-2.09873		1.4579	-170.899	-1.43954	-0.230607
1.83517	-164.022	-1.76428	-0.505152		0.0325877	34.8545	0.0267417	0.0186237		2.21064	-85.4517	0.175302	-2.20367		1.38	-65.443	0.573528	-1.25518		0.603296	146.181	-0.501219	0.335777
0.136657	-92.783	-0.00663524	-0.136496		0.92632	5.17046	0.92255	0.083479		2.42804	-105.498	-0.648782	-2.33976		3.09794	-168.771	-3.03863	-0.603282		2.28681	161.455	-2.16806	0.727336
2.09091	172.5	-2.07302	0.272929		0.355558	-74.5576	0.0946746	-0.342722		1.83194	-54.1976	1.07167	-1.48577		1.80934	-175.303	-1.80326	-0.148146		1.46191	-42.469	1.07837	-0.987066
1.16484	154.342	-1.04998	0.504369		0.641701	159.007	-0.599108	0.22989		1.42627	-40.0431	1.0919	-0.917609		0.451934	165.66	-0.437853	0.111932		1.26699	-129.256	-0.801732	-0.98106
1.40938	-1.33833	1.409	-0.0329177		0.532679	91.4381	-0.0133685	0.532511		0.924268	-42.4212	0.6823	-0.623488		0.710587	135.047	-0.502872	0.502049		0.66785	-128.049	-0.411615	-0.525924
2.63742	16.3667	2.53055	0.743185		1.43766	136.224	-1.03807	0.994624		1.27906	-156.05	-1.16894	-0.519214		2.32201	154.346	-2.09312	1.00528		0.747121	170.425	-0.736713	0.124271
1.52549	90.1272	-0.00338621	1.52549		1.034	46.6321	0.710029	0.751679		0.933758	15.2948	0.900686	0.246312		1.59149	-90.35	-0.00972254	-1.59146		0.764443	43.0772	0.558375	0.522102
2.34586	56.6544	1.28949	1.95966		1.02947	117.867	-0.481194	0.910084		0.820347	70.4793	0.274116	0.773194		2.61963	-128.625	-1.63521	-2.0466		1.77412	41.7506	1.32358	1.18137
2.55636	66.1887	1.03207	2.33877		1.73665	130.224	-1.12148	1.32598		1.84348	-172.483	-1.82764	-0.241163		2.67825	-148.575	-2.28541	-1.3964		1.95071	86.0756	0.133507	1.94614
2.61882	-96.0793	-0.277348	-2.60409		1.371	70.1238	0.466125	1.28933		0.412461	-164.37	-0.39721	-0.111124		4.46564	-164.394	-4.30101	-1.20134		0.965304	-53.5161	0.573966	-0.776128
2.24881	-51.8424	1.38938	-1.76827		1.79109	80.4795	0.296245	1.76642		2.28763	174.645	-2.27765	0.213492		1.32045	-130.352	-0.854976	-1.00628		1.07938	-28.1947	0.95131	-0.509975
3.32845	-33.058	2.78964	-1.81563		0.143291	1.10171	0.143265	0.00275509		0.671613	82.4627	0.0880969	0.66581		0.89563	-67.9948	0.335584	-0.830383		0.385179	-87.9482	0.0137904	-0.384932
1.19853	-36.855	0.959009	-0.718868		0.847056	0.48309	0.847026	0.00714187		1.21379	130.276	-0.784671	0.926053		4.13463	-173.248	-4.10595	-0.486127		0.162924	122.705	-0.0880296	0.137095
1.77357	-152.836	-1.57795	-0.80969		2.04069	22.2998	1.88807	0.774349		1.51608	86.4279	0.0944573	1.51313		0.363848	-101.854	-0.074742	-0.356088		1.02806	113.258	-0.405956	0.944518
1.88607	-12.6076	1.84059	-0.411677		1.1556	127.822	-0.708623	0.912833		0.618777	-155.638	-0.563682	-0.255242		0.79577	-173.07	-0.789957	-0.0960101		1.76654	-80.7129	0.285086	-1.74338
0.945502	178.385	-0.945126	0.0266521		1.69536	65.2888	0.708736	1.54011		1.22869	-171.094	-1.21388	-0.190222		2.50633	171.762	-2.48046	0.359126		2.97467	-162.427	-2.83585	-0.898127
0.0965076	41.6251	0.0721402	0.0641055		1.65512	77.4772	0.358875	1.61574		0.641237	-139.112	-0.484766	-0.419746		0.624111	38.1507	0.490794	0.385533		1.37905	-146.153	-1.14534	-0.768088
3.14046	-11.74	3.07477	-0.638995		1.76431	89.945	0.00169483	1.76431		1.39825	-176.119	-1.39504	-0.0946486		1.4225	157.071	-1.31011	0.554185		0.98832	-33.3632	0.825446	-0.543521
1.59534	-16.0419	1.53321	-0.440855		2.49015	45.1065	1.75753	1.76407		3.73467	-59.5491	1.89273	-3.21952		2.09861	159.083	-1.96031	0.749243		1.53551	177.123	-1.53357	0.0770712
0.465322	154.499	-0.419991	0.20033		2.07509	65.9094	0.847011	1.89435		2.55679	-94.8358	-0.215539	-2.54769		1.24499	73.3184	0.357378	1.19259		2.05565	179.661	-2.05562	0.0121465
0.399673	86.5936	0.023748	0.398967		2.18947	62.7625	1.00207	1.94669		3.51087	-35.6486	2.85296	-2.04618		3.06574	-93.9602	-0.21173	-3.05842		1.81606	171.379	-1.79554	0.272225
1.47534	36.3822	1.18776	0.875123		1.39921	-126.223	-0.826843	-1.12877		1.39322	-67.8236	0.525884	-1.29016		3.08157	-103.739	-0.731886	-2.9934		3.13277	165.349	-3.03091	0.792381
2.59269	26.3396	2.32351	1.15035		0.78526	-66.3808	0.314619	-0.719478		1.62796	-129.542	-1.03644	-1.2554		2.52637	-71.0547	0.820225	-2.38952		2.79037	-131.159	-1.83647	-2.10084
2.07193	-154.391	-1.86839	-0.895552		0.616277	-131.388	-0.407456	-0.462361		2.19795	-30.9909	1.88419	-1.13173		1.98167	-105.369	-0.525206	-1.9108		2.75035	-150.373	-2.39076	-1.35966
0.763201	178.895	-0.763059	0.0147214		2.10769	-174.493	-2.09796	-0.202283		2.02631	-15.3674	1.95386	-0.536985		1.91437	-59.7892	0.963277	-1.65436		1.44831	-121.897	-0.765274	-1.22962
1.88452	132.916	-1.28322	1.38013		1.5128	-179.726	-1.51279	-0.00722439		1.00119	-152.857	-0.890928	-0.456749		2.40569	-133.048	-1.64216	-1.75803		1.58332	-153.379	-1.41547	-0.709461
3.57123	137.452	-2.63096	2.41491		2.36551	173.88	-2.35203	0.252209		2.51969	175.604	-2.51228	0.193128		1.44875	-58.3323	0.760583	-1.23304		0.520259	-166.179	-0.505196	-0.124285
3.32662	-85.54	0.258689	-3.31655		0.670031	169.575	-0.658971	0.121239		0.767231	-161.192	-0.726262	-0.247359		1.77281	-26.0659	1.5925	-0.778982		2.19684	173.097	-2.18092	0.264042
3.32215	-113.07	-1.30178	-3.05647		0.193791	70.4783	0.0647582	0.182651		0.254172	28.1651	0.224076	0.119973		2.14538	-148.91	-1.83722	-1.10783		3.84111	-152.666	-3.41224	-1.76372
2.9979	-92.4622	-0.128791	-2.99513		1.59747	137.124	-1.17066	1.08695		1.39178	24.439	1.26708	0.575812		1.42331	-43.8386	1.02663	-0.985828		2.44813	-156.314	-2.24189	-0.983484
2.70469	-71.9948	0.836028	-2.57224		3.49534	-90.7738	-0.0472059	-3.49502		1.27804	91.9835	-0.0442345	1.27727		1.30092	-135.441	-0.926945	-0.912774		1.42132	-132.111	-0.953085	-1.0544
2.9051	-45.8808	2.02239	-2.08555		4.19981	-52.9905	2.52807	-3.3537		2.50728	48.0854	1.67492	1.86577		0.77386	-149.513	-0.666867	-0.392618		2.66969	170.362	-2.63201	0.446945
3.0821	-135.866	-2.21205	-2.1462		4.05496	-45.9415	2.81979	-2.91401		2.6556	107.325	-0.790805	2.53513		1.49942	-164.82	-1.4471	-0.392618		2.07196	-163.695	-1.98863	-0.581717
2.30861	-51.5754	1.43476	-1.80862		2.66082	-89.6569	0.0159328	-2.66077		3.31577	59.726	1.6716	2.86358		0.0484125	-0.326778	0.0484117	-0.000276112		2.38645	-175.395	-2.37875	-0.1916
2.48375	-40.1838	1.89753	-1.60262		2.80293	-104.407	-0.697401	-2.71479		3.54285	71.2896	1.13649	3.35562		0.831328	-0.131613	0.831326	-0.00190963		2.56284	166.796	-2.49509	0.58542
2.02637	-128.68	-1.26642	-1.58188		2.47971	-63.5632	1.10399	-2.2204		3.74803	98.8276	-0.575178	3.70363		0.185962	-68.2602	0.068879	-0.172736		1.59677	139.181	-1.20839	1.04377
0.91083	-82.9541	0.111727	-0.903951		1.30701	-100.682	-0.242264	-1.28436		3.7978	88.0545	0.128934	3.79561		1.75046	26.3521	1.56856	0.777005		2.44906	150.433	-2.13015	1.20846
2.30504	-21.8255	2.13982	-0.856973		1.84723	-47.0161	1.25943	-1.35133		1.78637	-21.9085	1.65736	-0.666541		1.50172	126.214	-0.88722	1.21161		0.549718	137.408	-0.404694	0.372038
1.84935	-17.9046	1.75978	-0.568549		1.64711	-31.6939	1.40147	-0.865361		2.51916	-9.26593	2.48629	-0.405628		1.62431	76.381	0.382468	1.57864		2.15626	-145.309	-1.77294	-1.22724
1.37306	-148.581	-1.17174	-0.71577		0.8423	-76.6101	0.195057	-0.819403		0.728812	-30.7439	0.626386	-0.37257		1.97151	74.6146	0.523061	1.90086		0.759589	-103.253	-0.174135	-0.739359
1.49976	-6.3631	1.49052	-0.166216		0.2906	-81.8175	0.0413602	-0.287641		2.83847	-0.150096	2.83846	-0.00743584		2.44535	55.8665	1.37214	2.0241		0.792279	-66.0007	0.32224	-0.723786
0.00149633	76.2239	0.000356319	0.00145328		0.726662	156.056	-0.664128	0.29491		3.32382	8.90568	3.28375	0.514555		4.02578	35.391	3.28189	2.33154		2.14513	-167.972	-2.09804	-0.447009
2.15137	-21.761	1.99806	-0.797591		0.618945	97.257	-0.0781857	0.613987		0.967605	87.9	0.035457	0.966955		2.60606	70.9834	0.849163	2.46383		0.351743	48.4871	0.233131	0.263387
0.590448	-112.808	-0.228884	-0.54428		1.52817	136.152	-1.10208	1.05864		1.50119	43.9007	1.08167	1.04094		1.28201	178.985	-1.28181	0.0227052		1.44385	133.436	-0.992709	1.04844
1.99471	-14.093	1.93468	-0.485707		1.04922	50.9645	0.660803	0.81499		1.15109	107.571	-0.347493	1.09738		1.15743	123.309	-0.635604	0.967293		3.243	-56.2705	1.80075	-2.6971
1.39559	-15.2454	1.34647	-0.366975		1.119	119.128	-0.544687	0.977481		2.64516	42.6093	1.9468	1.79076		2.87456	148.905	-2.46152	1.48458		3.49627	-32.0558	2.9632	-1.85563
2.42996	-172.919	-2.41143	-0.299536		1.82854	130.451	-1.18637	1.39144		3.42384	35.7587	2.7784	2.0008		2.11873	135.444	-1.50975	1.4865		2.47235	-50.1357	1.58471	-1.89769
4.26078	-173.334	-4.23198	-0.494595		1.42171	73.2425	0.409911	1.36134		2.16215	104.219	-0.531083	2.09591		1.79446	114.933	-0.756473	1.62722		3.12517	-8.84638	3.08799	-0.480607
1.63998	-174.068	-1.6312	-0.169497		1.85543	82.696	0.235888	1.84037		3.0649	55.92	1.71742	2.53852		0.871972	32.1025	0.738647	0.463397		0.532223	-54.839	0.306494	-0.435112
1.55437	139.343	-1.17918	1.01271		2.24985	-97.7141	-0.301998	-2.22948		3.12608	65.1316	1.31463	2.83622		0.529086	-115.988	-0.23184	-0.475587		2.60359	-33.6883	2.16636	-1.44414
2.56163	-78.1585	0.52566	-2.50712		2.40718	-127.709	-1.47235	-1.90439		0.999172	39.7899	0.76776	0.639444		0.734619	-3.19247	0.733478	-0.0409112		1.18367	-65.4804	0.491231	-1.07693
2.86012	-53.4285	1.70413	-2.297		1.68011	-114.724	-0.702704	-1.5261		1.63856	102.118	-0.343964	1.60206		0.609986	11.8685	0.596946	0.125454		2.80502	-14.4161	2.7167	-0.698344
1.81967	-12.13	1.77904	-0.38237		1.68949	-59.0711	0.868353	-1.44925		1.86306	74.8449	0.487066	1.79827		0.611425	145.171	-0.501892	0.349206		0.365023	-81.4893	0.0540212	-0.361004
0.952392	-11.3426	0.933791	-0.187312		1.37657	-129.951	-0.883937	-1.05527		3.13653	113.775	-1.26446	2.87036		0.877899	53.1218	0.526841	0.702243		1.01145	167.195	-0.986291	0.224172
1.26641	9.59697	1.24868	0.211131		1.61835	-150.413	-1.40733	-0.799056		2.00735	-93.9018	-0.136594	-2.0027		1.38182	35.3209	1.12747	0.798908		1.30677	131.004	-0.857385	0.986176
3.78713	-58.8824	1.95717	-3.24219		1.04111	-32.9074	0.874066	-0.565619		1.55276	-112.214	-0.587043	-1.43751		1.19968	92.126	-0.044505	1.19885		3.64195	14.2488	3.52991	0.896406
2.82504	-76.1019	0.678563	-2.74234		0.601394	-159.167	-0.562077	-0.21388		1.49165	-63.4643	0.666404	-1.33451		1.36828	74.3172	0.369862	1.31734		0.701553	92.8499	-0.0348804	0.700685
3.40162	-44.8262	2.41259	-2.398		1.6624	3.33484	1.65959	0.0967039		0.753103	-37.795	0.595109	-0.46153		2.12252	130.566	-1.38032	1.61239		2.70177	146.573	-2.25487	1.48833
1.88678	-73.7889	0.526746	-1.81176		1.78625	33.3871	1.49147	0.982958		0.443353	-74.8882	0.115584	-0.428021		2.09947	47.273	1.4245	1.54226		2.53099	130.168	-1.63256	1.93408
2.23398	-54.1938	1.30698	-1.81176		1.16592	113.347	-0.462061	1.07045		0.844992	160.131	-0.794689	0.287193		1.65338	91.562	-0.045069	1.65276		1.92399	91.04	-0.0349198	1.92367
1.00997	-39.3929	0.780518	-0.640963		0.24085	80.4968	0.0397653	0.237545		0.698785	33.4343	0.583148	0.385017		1.94989	60.1502	0.970518	1.69121		1.3747	49.2967	0.896497	1.04215
0.839527	-80.7232	0.135335	-0.828547		0.530132	31.4608	0.452201	0.276684		2.09072	149.813	-1.8072	1.05125		2.99923	137.9	-2.22536	2.01075		2.85484	27.6207	2.52949	1.32355
1.44213	-2.05515	1.4412	-0.0517167		1.84634	36.3234	1.48757	1.09366		1.03206	73.5946	0.291488	0.990044		1.82056	-0.22883	1.82055	-0.00727101		1.50001	-59.9907	0.750216	-1.29893
2.12996	11.6536	2.08605	0.430239		1.70691	130.129	-1.10013	1.30509		1.56493	126.222	-0.924728	1.26249		2.53725	15.2112	2.44836	0.66572		2.03371	-45.5159	1.42504	-1.45094
1.23803	-8.11695	1.22563	-0.174803		1.93446	79.3774	0.356595	1.90131		2.01172	119.519	-0.991194	1.75059		1.92559	66.4847	0.768297	1.76568		0.330117	-22.8795	0.304144	-0.128347
0.370995	-17.2509	0.354306	-0.110021		2.02845	89.9533	0.00165453	2.02845		2.84251	133.114	-1.94271	2.07503		3.16989	41.805	2.36289	2.11304		0.686362	12.9866	0.668807	0.154242
0.505376	145.854	-0.418255	0.283668		2.18915	99.9251	-0.377326	2.15639		2.60266	109.386	-0.863919	2.45509		3.97556	38.5732	3.10814	2.47882		0.331551	173.61	-0.329491	0.036903
2.39917	6.52385	2.38364	0.272586		2.55161	56.7598	1.39867	2.13412		1.89959	-71.0861	0.615744	-1.79702		3.605	-127.006	-2.16985	-2.87884		0.581954	-1.65878	0.58171	-0.0168459
0.767908	40.7842	0.581441	0.501606		2.32971	78.6901	0.456894	2.28447		1.01932	-86.6933	0.0587958	-1.01762		3.02221	-117.374	-1.38962	-2.68378		2.17163	8.57279	2.14737	0.323716
0.712635	86.98	0.0375448	0.711646		2.42169	74.8896	0.631284	2.33796		1.09989	-19.9058	1.03418	-0.374486		2.08089	-108.911	-0.674404	-1.96857		1.12095	-116.342	-0.497399	-1.00455
1.5371	-99.8094	-0.261876	-1.51462		0.488272	-69.0959	0.174218	-0.456134		0.512456	162.808	-0.48956	0.151466		2.42878	-147.125	-2.03981	-1.31837		0.878906	-73.2462	0.253353	-0.841599
1.55105	-126.018	-0.912071	-1.25455		1.5118	-22.5345	1.39637	-0.57938		2.15989	20.7348	2.01999	0.764695		1.5765	-59.3109	0.804614	-1.35571		0.544089	-27.7699	0.481424	-0.253504
1.96358	-138.609	-1.47312	-1.2983		2.61783	-1.99417	2.61624	-0.0910947		1.61538	52.2725	0.988461	1.27765		0.489612	-135.515	-0.349307	-0.343082		1.24564	-157.116	-1.14759	-0.484395
0.779685	-94.42	-0.0600876	-0.777366		0.668805	30.1631	0.578248	0.33605		0.643888	-46.7193	0.441432	-0.468752		0.224256	131.059	-0.147299	0.169097		1.68277	-172.34	-1.66775	-0.224317
1.93706	166.993	-1.88736	0.43596		0.795652	53.6065	0.472083	0.640469		1.74651	-26.8163	1.55869	-0.787908		2.62738	177.556	-2.62499	0.112055		0.598833	30.6926	0.514947	0.305664
0.435964	66.0923	0.17668	0.398558		3.30322	-143.807	-2.6658	-1.95059		2.37229	-15.7054	2.28373	-0.642159		1.56171	146.035	-1.29524	0.872514		0.870205	96.4698	-0.0980546	0.864663
0.999288	126.192	-0.590072	0.806468		3.46133	-151.991	-3.05592	-1.62549		1.18811	23.3385	1.0909	0.470682		1.15628	138.759	-0.869463	0.76225		1.02613	-88.8829	0.020006	-1.02593
0.770373	-27.3826	0.684057	-0.354318		2.09379	-136.219	-1.51169	-1.4487		2.64975	10.8928	2.60201	0.500727		1.99089	153.373	-1.77974	0.892289		1.74124	141.237	-1.35771	1.0902
2.42268	-9.63331	2.38852	-0.405416		2.81693	-161.147	-2.6658	-0.910273		1.33382	75.1624	0.341565	1.28934		2.51448	152.723	-2.23487	1.15237		0.408376	-36.6328	0.327712	-0.243671
1.36734	-11.2888	1.34088	-0.267662		3.02812	-165.069	-2.92588	-0.780234		0.939156	-177.711	-0.938407	-0.0375113		1.22065	91.0293	-0.0219281	1.22046		1.34377	5.72306	1.33708	0.134002
0.748068	140.153	-0.574339	0.479313		2.6403	-170.074	-2.60078	-0.455137		1.55237	-168.948	-1.52358	-0.297589		2.0078	105.731	-0.544365	1.9326		0.935991	157.078	-0.862081	0.36455
2.95072	1.42571	2.94981	0.0734162		3.2743	-173.157	-3.25098	-0.390117		0.367036	70.9218	0.119969	0.346876		2.09978	66.7527	0.828782	1.9293		2.57926	23.1986	2.37071	1.01602
1.30331	121.229	-0.675709	1.11446		2.86381	-177.397	-2.86086	-0.130039		2.20455	137.355	-1.6216	1.49347		2.37238	-119.285	-1.16047	-2.06918		0.903705	-51.9209	0.557359	-0.71136
3.21415	25.9169	2.8909	1.4048		1.93972	166.43	-1.88557	0.455137		0.671638	-50.3932	0.42818	-0.517455		2.07267	-93.3234	-0.120156	-2.06918		0.612925	112.117	-0.23077	0.567822
2.91255	46.0177	2.02258	2.09574		2.3872	149.3	-2.05264	1.21876		1.41646	5.50256	1.40993	0.135825		2.20578	-42.4354	1.62795	-1.48837		3.09519	14.9509	2.99041	0.798535
1.99447	-114.82	-0.837207	-1.81025		2.16526	136.169	-1.56199	1.49951		2.33168	3.43424	2.32749	0.139674		2.56259	-24.4775	2.33228	-1.06177		2.07682	35.4844	1.6911	1.20556
2.47759	-160.306	-2.33266	-0.834953		2.4595	-31.4665	2.09782	-1.28386		1.31862	36.5744	1.05897	0.785723		1.37825	-41.0803	1.03891	-0.905671		2.22803	91.1135	-0.043296	2.2276
3.13506	-162.073	-2.98285	-0.964992		1.9005	-17.3481	1.81405	-0.566683		1.03934	122.649	-0.56071	0.875118		1.99342	-155.274	-1.81066	-0.83381		2.57552	106.272	-0.721671	2.47235
1.70497	-155.578	-1.55242	-0.704914		0.666106	-35.2303	0.544102	-0.384253		1.59414	123.616	-0.882555	1.32755		2.00018	-16.3121	1.91967	-0.561791		4.04814	-132.95	-2.75825	-2.96303
0.3149	-72.7546	0.0933567	-0.300744		0.253864	-11.113	0.249104	-0.0489311		1.2353	73.3944	0.353027	1.18378		0.963391	-25.7431	0.867775	-0.418435		1.58921	-112.685	-0.612898	-1.46627
3.3084	-179.052	-3.30795	-0.0547194		1.38938	-71.2582	0.446412	-1.31571		2.5746	52.6383	1.56238	2.04634		2.22371	-2.88833	2.22089	-0.112052		3.13359	-149.312	-2.69476	-1.59926
2.36677	170.26	-2.33266	0.400417		1.60807	-53.7391	0.951117	-1.29664		2.5076	67.6516	0.953485	2.31925		0.793808	15.4086	0.765275	0.210915		2.0525	-150.391	-1.78448	-1.01409
0.429057	27.0005	0.382291	0.194791		1.69492	-136.425	-1.22792	-1.16832		3.1154	57.9579	1.65285	2.64079		1.44234	4.75639	1.43737	0.119598		3.22757	-162.899	-3.08488	-0.949066
2.77374	156.718	-2.54788	1.09633		1.44874	-116.337	-0.642745	-1.29836		3.92883	-88.5115	0.102056	-3.92751		2.88075	-40.0662	2.20464	-1.85426		0.168158	-6.71808	0.167003	-0.0196718
1.28898	134.423	-0.902226	0.920573		1.75042	-27.2564	1.55606	-0.801645		3.18957	-66.0941	1.29253	-2.91594		2.45234	-24.8931	2.22451	-1.03225		0.918161	94.7476	-0.0759931	0.915011
2.41811	146.425	-2.01468	1.33728		1.90457	-162.171	-1.8131	-0.583144		3.80944	-124.085	-2.13487	-3.15502		1.4538	-47.4649	0.982828	-1.07125		2.93402	-26.1308	2.63414	-1.29221
0.662543	-36.4325	0.533054	-0.393468		1.06737	-146.415	-0.889186	-0.590447		2.04605	-49.6678	1.32424	-1.55971		1.20408	-87.1948	0.0589292	-1.20264		1.78273	-27.5933	1.57996	-0.825746
0.280514	-132.33	-0.188899	-0.207378		0.615544	-106.417	-0.173971	-0.590447		2.92565	-148.658	-2.49872	-1.52179		3.18911	-10.798	3.13264	-0.597469		2.20846	-20.1405	2.07341	-0.760422
1.44128	9.38835	1.42198	0.235109		0.371689	7.15104	0.368798	0.0462699		2.37952	-160.186	-2.23865	-0.806571		1.7644	-8.59147	1.7446	-0.263581		1.34895	-20.4367	1.26404	-0.471017
1.27726	107.568	-0.385523	1.21769		1.98125	166.876	-1.9295	0.449865		1.23729	-139.316	-0.938256	-0.806571		0.690316	144.518	-0.56212	0.400696		3.11321	4.92978	3.10169	0.267533
2.24132	31.121	1.91875	1.15842		1.00371	107.401	-0.300171	0.95777		2.1202	-174.006	-2.10861	-0.221396		1.50388	53.4794	0.894976	1.20858		0.55498	102.619	-0.121248	0.541573
1.30715	64.0623	0.57174	1.17548		0.242287	-44.0906	0.17402	-0.168582		1.25359	-100.041	-0.218567	-1.23439		2.946	27.1134	2.62225	1.34265		2.04243	25.933	1.83677	0.893192
0.885926	-87.1915	0.0434083	-0.884861		0.766091	-5.96449	0.761944	-0.0796061		0.621968	-118.189	-0.293807	-0.548199		2.09669	37.8724	1.65508	1.28717		3.13178	32.0528	2.65437	1.66204
0.709226	-12.2581	0.693057	-0.15058		1.64737	14.3391	1.59605	0.407989		1.90046	-168.741	-1.86388	-0.371062		1.98301	66.1659	0.801314	1.81389		0.210806	-123.961	-0.117763	-0.174846
1.04117	-163.225	-0.996864	-0.300487		2.62931	13.3092	2.55869	0.605282		0.969713	-169.543	-0.953607	-0.176004		2.49723	-111.134	-0.90039	-2.32926		1.69813	-4.22331	1.69352	-0.125057
1.5415	4.91336	1.53584	0.132029		1.69514	25.6844	1.52765	0.734696		1.54278	-175.875	-1.53878	-0.110984		2.33346	-86.5623	0.139922	-2.32926		0.430673	35.9685	0.348561	0.252951
1.12605	26.6739	1.00621	0.505498		0.993364	94.3199	-0.0748251	0.990542		0.672151	5.15484	0.669432	0.0603912		2.57358	-42.7772	1.88901	-1.74784		1.03801	3.3648	1.03622	0.0609238
0.604965	47.2539	0.410621	0.444267		1.7585	63.2756	0.790797	1.57066		1.82039	167.185	-1.77505	0.403755		2.91442	-26.8279	2.60073	-1.31531		1.30122	143.383	-1.04441	0.776138
0.901969	63.4847	0.402672	0.807096		3.08745	31.6427	2.62846	1.61974		1.14677	48.6609	0.757456	0.861008		1.74604	-41.8256	1.30111	-1.16437		1.68515	70.4199	0.564737	1.58771
2.71029	156.864	-2.49231	1.06492		2.83642	37.4089	2.25303	1.72312		2.07376	123.876	-1.15592	1.72173		1.89761	-144.798	-1.55059	-1.09389		2.12705	43.9927	1.53026	1.47738
1.57482	101.427	-0.312003	1.54361		2.21275	77.2636	0.487835	2.1583		2.31293	-56.2924	1.28357	-1.92408		2.33542	-20.581	2.18636	-0.820975		2.79974	-79.4981	0.510303	-2.75284
1.78067	77.2119	0.394144	1.7365		3.11711	53.8354	1.83943	2.51652		2.05739	-103.688	-0.486853	-1.99895		1.31871	-30.8075	1.13263	-0.675385		2.78628	-92.364	-0.114926	-2.78391
2.21781	118.263	-1.05017	1.95341		2.967	-72.2521	0.904429	-2.82579		1.81829	-81.3739	0.272717	-1.79772		2.50936	-8.25313	2.48337	-0.36021		2.69247	-120.294	-1.35819	-2.32481
2.06946	90.5225	-0.0188729	2.06937		2.27533	-98.1682	-0.323279	-2.25225		1.99722	-129.377	-1.26709	-1.54382		1.05156	0.526513	1.05152	0.00966306		2.36296	-36.7837	1.8925	-1.41493
2.44039	-155.965	-2.22881	-0.993942		1.80383	-114.556	-0.749631	-1.64069		1.4653	-48.8392	0.964427	-1.10318		1.71028	-3.4618	1.70715	-0.103272		1.32296	-112.812	-0.512932	-1.21948
3.17463	-171.417	-3.13908	-0.473786		1.5711	-65.9619	0.639977	-1.43484		1.49588	-7.48064	1.48315	-0.19475		2.87935	-96.2162	-0.31178	-2.86242		1.0424	-137.865	-0.77301	-0.699321
0.869236	-156.705	-0.798379	-0.343747		1.17932	-68.4087	0.43397	-1.09657		2.06174	-173.219	-2.04732	-0.243427		3.9976	-138.145	-2.97758	-2.66737		1.16012	-161.181	-1.09811	-0.374223
3.21318	172.242	-3.18378	0.433719		0.606015	-60.5343	0.298101	-0.527627		1.03601	-166.41	-1.00701	-0.243427		3.31234	-149.28	-2.84754	-1.69207		1.05066	-4.53959	1.04736	-0.0831573
0.646674	120.375	-0.326994	0.557909		1.32734	-152.391	-1.1762	-0.615128		0.48925	-174.326	-0.486853	-0.0483682		1.67883	-157.156	-1.54715	-0.651762		1.38719	167.062	-1.35198	0.310589
2.1617	131.07	-1.42021	1.62971		2.2055	-167.294	-2.15149	-0.485089		0.706617	19.9096	0.664383	0.24063		0.793007	-47.2101	0.538699	-0.581948		2.46943	121.984	-1.308	2.09457
2.94453	136.3	-2.1288	2.03431		0.931999	-15.6618	0.897395	-0.2516		1.17178	11.1912	1.1495	0.227423		0.858925	-66.759	0.338931	-0.789226		2.663	80.0649	0.459454	2.62306
2.0861	103.797	-0.49751	2.02591		0.315471	-97.7447	-0.0425128	-0.312594		1.3988	-68.0253	0.523428	-1.29718		1.12161	-3.39064	1.11965	-0.0663357		2.35953	-15.2697	2.27623	-0.621413
4.42863	148.229	-3.76504	2.33179		0.701219	-153.526	-0.627688	-0.312594		1.23136	-101.982	-0.25564	-1.20453		0.640651	-173.366	-0.636361	-0.0740116		0.630695	-110.57	-0.221597	-0.590483
3.82608	-60.4246	1.88843	-3.32757		1.27794	179.439	-1.27788	0.0125038		1.49028	-5.8647	1.48248	-0.152276		1.42331	159.283	-1.33128	0.503488		0.574799	-0.175888	0.574796	-0.00176453
3.46236	-90.9888	-0.0597477	-3.46185		0.208779	51.4044	0.130241	0.163175		2.38963	-60.7555	1.16742	-2.08506		2.34588	9.92549	2.31077	0.404354		3.1602	2.05008	3.15818	0.11305
3.41856	-94.1323	-0.246339	-3.40967		1.45321	28.815	1.27328	0.700423		1.90067	-86.4406	0.117998	-1.897		3.28032	18.224	3.11579	1.02587		1.68541	85.0488	0.145463	1.67912
3.42204	-130.126	-2.20539	-2.6166		1.015	54.6842	0.586756	0.82822		3.08009	-41.9364	2.29124	-2.05844		1.60903	133.321	-1.10392	1.17061		2.36172	96.8091	-0.280007	2.34506
3.31774	-132.398	-2.23709	-2.45007		0.627448	-23.4617	0.575575	-0.24981		2.062	-78.0416	0.427251	-2.01725		1.06031	98.8692	-0.163478	1.04763		2.59561	89.2451	0.0341963	2.59538
2.75982	-54.9968	1.58309	-2.26062		1.12054	8.83537	1.10724	0.17211		2.29842	-43.3234	1.67208	-1.57698		2.30289	67.8198	0.869391	2.13248		2.71851	74.5421	0.724565	2.62017
2.0511	-117.844	-0.95801	-1.81362		0.534337	123.024	-0.291207	0.448011		2.05805	-123.789	-1.14456	-1.71042		2.21156	79.9895	0.384434	2.17789		0.983076	-83.1891	0.116586	-0.976139
3.10305	-140.676	-2.40045	-1.9664		1.25119	32.8626	1.05096	0.678926		0.661743	-68.3585	0.244049	-0.615097		4.88015	27.923	4.31199	2.2853		1.76929	173.91	-1.7593	0.187702
1.44748	-79.6033	0.261216	-1.42371		2.13508	37.9593	1.6834	1.31329		1.22578	-126.392	-0.727255	-0.986731		2.79523	101.329	-0.549084	2.74077		2.0992	-168.372	-2.05612	-0.423098
1.76151	-119.665	-0.871821	-1.53064		1.35674	67.771	0.513268	1.25591		1.76953	-28.4819	1.55536	-0.843855		3.59096	54.0882	2.10624	2.90839		0.0403327	38.5903	0.0315251	0.0251574
1.71254	-26.1695	1.53699	-0.755279		1.97114	128.738	-1.23346	1.53752		0.587414	144.567	-0.478619	0.340556		2.73306	-54.7986	1.57548	-2.23327		0.686379	51.1028	0.430995	0.534191
2.11477	-153.69	-1.89569	-0.937333		0.403387	171.943	-0.399406	0.0565387		1.438	28.3021	1.2661	0.681787		2.49949	-65.9662	1.01798	-2.2828		1.41525	63.7407	0.626158	1.2692
0.858331	-109.368	-0.284653	-0.809756		2.0945	-176.208	-2.08991	-0.13852		2.35543	-52.6697	1.42835	-1.87292		2.93254	-42.2103	2.17209	-1.97024		2.59238	115.557	-1.11836	2.33874
2.11973	-173.764	-2.10719	-0.230248		0.739049	-153.169	-0.659484	-0.333578		1.44608	-73.6256	0.407667	-1.38742		2.06687	-107.498	-0.62144	-1.97123		3.87469	120.958	-1.99318	3.32272
2.1843	3.95192	2.17911	0.15054		0.0572966	45.0921	0.0404496	0.0405799		1.97642	-34.0997	1.6366	-1.10805		1.88123	-72.1243	0.57745	-1.79041		0.64761	156.52	-0.593989	0.258022
2.60608	163.388	-2.49731	0.745044		0.287599	118.976	-0.139328	0.251597		0.884072	-168.365	-0.865907	-0.178294		1.99429	-126.002	-1.17226	-1.61338		0.940804	70.1823	0.31896	0.885086
1.15893	69.8856	0.398552	1.08824		0.601026	31.7891	0.510868	0.316617		2.27601	-7.78584	2.25503	-0.308333		2.50105	-35.2286	2.043	-1.44271		1.76328	159.819	-1.65502	0.608312
2.21276	30.0828	1.91471	1.10915		2.45396	161.819	-2.33146	0.765666		0.919101	42.0814	0.682151	0.615968		1.21148	-115.527	-0.522068	-1.09322		0.904429	124.795	-0.516104	0.742718
3.06148	153.161	-2.73168	1.38223		0.835615	60.4683	0.411879	0.727055		1.0854	55.9048	0.608441	0.898824		0.966791	-127.391	-0.587088	-0.768123		3.21769	150.279	-2.79439	1.59528
2.07299	43.7036	1.49862	1.43229		0.817411	98.7828	-0.12481	0.807827		1.03101	105.8	-0.280732	0.992057		1.95224	-6.59811	1.93931	-0.224321		1.66793	88.2598	0.0506506	1.66716
1.93673	97.7347	-0.260656	1.9191		0.811479	71.9979	0.25079	0.771753		1.72075	118.767	-0.82811	1.50839		1.12226	-170.618	-1.10724	-0.182947		0.967999	-87.4526	0.0430227	-0.967043
2.84414	-53.42	1.69495	-2.28392		1.71549	127.722	-1.0496	1.35693		1.83211	-20.5515	1.71551	-0.643159		0.915984	-6.10031	0.910797	-0.0973411		0.753564	-56.8708	0.411845	-0.631064
2.37326	-59.4526	1.20621	-2.04387		2.35783	139.697	-1.79816	1.52512		2.71242	-14.9767	2.62029	-0.700964		1.42159	10.1495	1.39934	0.250508		0.716022	128.51	-0.445827	0.56029
2.7354	-57.7988	1.45768	-2.31465		1.79212	93.9709	-0.124104	1.78782		2.9159	-12.5389	2.84635	-0.633046		0.362106	97.1672	-0.0451785	0.359277		2.40083	5.66958	2.38909	0.237181
2.373	-25.8323	2.13587	-1.03401		1.82156	84.1466	0.18577	1.81207		3.07544	-8.38495	3.04257	-0.448471		1.81434	147.708	-1.53372	0.969292		1.78629	14.2315	1.73147	0.43914
0.963956	-95.7868	-0.0971927	-0.959043		1.22974	-140.619	-0.950523	-0.780234		1.36061	-10.9577	1.3358	-0.258629		1.52804	133.005	-1.04222	1.11744		2.35569	22.2442	2.18038	0.891761
1.67073	-28.1468	1.47315	-0.78814		0.955171	15.2174	0.92168	0.250716		0.462498	107.244	-0.137106	0.441709		1.11744	86.9451	0.0595525	1.11586		1.60324	42.9915	1.1727	1.09323
2.39578	-8.74051	2.36795	-0.364061		1.49881	159.693	-1.40566	0.520156		3.89286	13.0366	3.79253	0.878127		3.1645	-109.174	-1.03933	-2.98896		2.32333	-102.169	-0.489762	-2.27112
2.43797	5.78744	2.42555	0.245841		1.27199	132.418	-0.857992	0.939041		3.11636	17.9021	2.96548	0.957945		3.07218	-98.5913	-0.458938	-3.03771		1.51744	-106.448	-0.429665	-1.45534
1.03251	-72.1275	0.316875	-0.98268		1.81168	41.9291	1.34784	1.21059		1.15714	60.7389	0.5656	1.00949		3.1377	-62.3402	1.45659	-2.77912		1.59285	-63.4754	0.711337	-1.42519
3.15458	-18.8284	2.98578	-1.01809		1.47013	69.1455	0.52336	1.37382		2.50539	-139.722	-1.91141	-1.61972		2.06249	-46.9938	1.40678	-1.50826		1.75874	-25.758	1.58399	-0.764298
2.0574	-29.9973	1.78181	-1.02861		2.27564	41.0833	1.71528	1.49545		2.2965	-158.03	-2.12972	-0.859186		2.41473	-150.059	-2.09245	-1.20523		1.32073	4.72512	1.31624	0.108796
2.18278	-14.8394	2.10998	-0.559032		2.40237	116.73	-1.08056	2.14564		2.07525	-174.22	-2.0647	-0.208991		1.33465	-61.0247	0.64655	-1.16759		1.79467	149.852	-1.55191	0.901349
0.23129	-26.2973	0.207353	-0.102468		2.28094	83.2474	0.268199	2.26512		0.910661	148.6	-0.777296	0.474462		0.840084	-58.0507	0.444546	-0.712825		1.7726	28.5921	1.55643	0.848318
0.825584	-145.38	-0.679402	-0.469044		2.89211	75.1753	0.739984	2.79584		2.28496	-81.8752	0.322934	-2.26203		1.85245	-162.565	-1.76735	-0.55503		2.195	43.9642	1.5799	1.52378
1.0046	-179.207	-1.0045	-0.0139079		3.10046	63.5563	1.38069	2.77606		2.54094	-113.966	-1.03212	-2.32187		1.77852	-77.2869	0.391397	-1.73492		1.67227	71.1949	0.539055	1.583
2.70277	-1.52654	2.70181	-0.0720016		1.77417	-96.455	-0.199458	-1.76292		2.96138	-132.778	-2.01124	-2.17364		2.47149	-35.4619	2.01303	-1.43386		2.42024	105.976	-0.666125	2.32676
1.21174	1.91175	1.21107	0.0404239		1.60948	-69.8063	0.555584	-1.51055		3.08055	-150.994	-2.69414	-1.49378		2.97652	-14.7834	2.87798	-0.759506		2.32358	75.6304	0.576659	2.25089
0.708646	116.803	-0.319548	0.63251		1.5061	-100.451	-0.273208	-1.48112		1.2656	-129.709	-0.808576	-0.973625		0.71394	-65.3381	0.297901	-0.648818		0.774146	16.0638	0.743919	0.214212
1.03072	79.826	0.182064	1.01451		1.65009	-136.281	-1.19259	-1.14041		2.10868	-165.766	-2.04395	-0.518489		3.23835	-6.62821	3.2167	-0.37379		2.88287	29.6947	2.50428	1.42811
1.53179	124.805	-0.874315	1.25776		1.25341	-39.1041	0.972646	-0.790563		1.30013	-65.8274	0.532384	-1.18613		2.43753	-7.72726	2.41539	-0.327744		1.7933	49.8456	1.15641	1.37064
0.0251445	-25.6502	0.0226666	-0.0108845		1.95581	-155.363	-1.77777	-0.81531		0.238941	107.01	-0.0698977	0.228489		1.07789	16.6567	1.03266	0.308964		3.1938	49.4931	2.0745	2.42833
1.18505	8.23203	1.17283	0.169677		1.05526	-132.13	-0.707878	-0.782608		1.92648	25.6363	1.73684	0.833505		2.35998	26.243	2.11673	1.04354		2.71048	104.763	-0.690694	2.621
2.78572	-3.99927	2.77893	-0.194286		1.28691	-151.186	-1.12758	-0.620252		2.80672	16.8161	2.6867	0.811985		3.25383	19.8564	3.06038	1.10521		0.938916	-102.345	-0.200744	-0.917205
3.1038	-1.52012	3.10271	-0.0823378		0.544861	-32.6118	0.458959	-0.29365		1.06046	-164.134	-1.02006	-0.289923		2.39449	-31.9692	2.03132	-1.26779		1.03529	-142.597	-0.822422	-0.628853
0.55755	29.4096	0.4857	0.273785		0.958291	-4.98264	0.95467	-0.0832313		0.040588	62.7004	0.0186154	0.0360674		0.613176	-112.942	-0.239018	-0.564673		0.636711	-170.171	-0.627364	-0.108697
2.7941	15.7427	2.68929	0.758089		1.68664	-167.67	-1.64773	-0.360174		0.798506	-26.5147	0.714519	-0.356475		0.83508	-36.9848	0.667058	-0.502387		1.28087	23.8599	1.1714	0.518111
1.0989	117.757	-0.511783	0.972446		0.097533	20.2826	0.0914854	0.0338098		1.34882	9.01008	1.33218	0.211237		0.978029	-14.1273	0.948449	-0.238715		1.38371	115.661	-0.599211	1.24724
2.70656	31.9108	2.29752	1.43068		0.853278	160.13	-0.802478	0.290021		0.857724	65.4368	0.356554	0.780103		1.77589	-10.5051	1.74613	-0.323785		1.25692	83.989	0.131625	1.25001
1.9258	52.4299	1.17422	1.5264		2.08678	159.308	-1.95217	0.737353		1.60656	108.149	-0.50043	1.52664		2.33667	-6.89413	2.31977	-0.280482		2.54066	-15.4976	2.44829	-0.678861
3.29177	30.1643	2.84602	1.65405		0.764935	67.8817	0.288013	0.708642		2.34792	39.7403	1.80543	1.50105		2.05902	6.98168	2.04375	0.250278		1.33275	-21.3841	1.241	-0.485945
2.2626	108.966	-0.735361	2.13976		1.10948	42.3752	0.819622	0.747767		2.83772	61.9526	1.3343	2.50445		0.866049	32.8216	0.727795	0.46942		0.894938	164.395	-0.861948	0.240748
2.85616	-60.5609	1.4038	-2.48737		1.19493	119.259	-0.584026	1.04248		3.14123	96.1159	-0.334665	3.12335		3.79804	10.4546	3.73499	0.689178		0.398765	98.2173	-0.0569944	0.394671
3.15409	-35.8248	2.55737	-1.84612		1.70259	124.86	-0.973161	1.39706		5.05747	69.2457	1.79217	4.72928		3.30694	16.2969	3.17407	0.927976		1.09904	111.725	-0.406811	1.02098
2.5826	-37.1895	2.0574	-1.56106		2.2015	118.865	-1.06277	1.92798		2.10662	146.516	-1.757	1.16222		3.28999	37.4791	2.61085	2.00187		1.52262	57.3609	0.821217	1.28217
2.1527	-35.0459	1.7624	-1.23615		2.29526	77.8138	0.484506	2.24354		1.58153	120.427	-0.800959	1.36371		2.03838	87.5855	0.0858728	2.03657		2.05612	48.4957	1.36254	1.53984
0.254789	72.8717	0.0750382	0.243488		2.14512	-96.6718	-0.249223	-2.1306		0.723643	-123.66	-0.401087	-0.602319		4.25752	28.4709	3.74262	2.02962		0.965279	20.5806	0.903673	0.339319
2.44711	-147.322	-2.05977	-1.32125		2.10363	-68.7961	0.760857	-1.96121		0.193126	64.9977	0.0816258	0.175028		2.92428	50.7709	1.84938	2.26521		2.54768	159.391	-2.38463	0.896771
1.29947	-145.834	-1.0752	-0.729771		2.1885	-110.938	-0.782066	-2.04399		1.19442	155.789	-1.08937	0.489826		3.62707	53.5523	2.1548	2.91762		3.96648	147.225	-3.33502	2.14723
2.05075	-166.579	-1.99475	-0.475992		2.32899	-130.007	-1.49728	-1.78392		0.936884	50.5383	0.595447	0.723321		3.15697	81.8566	0.447187	3.12514		3.62411	119.105	-1.76283	3.16648
0.718159	-151.202	-0.62934	-0.345953		2.09125	-117.856	-0.977124	-1.84893		1.42178	30.4797	1.22531	0.721176		4.75681	-89.5189	0.0399406	-4.75664		0.240676	90.856	-0.00359561	0.240649
2.19673	175.452	-2.18981	0.174203		2.03224	-61.3792	0.973461	-1.78392		2.18176	144.222	-1.77005	1.27555		4.55781	-103.518	-1.06539	-4.43154		1.48804	99.6125	-0.248479	1.46715
1.60834	176.107	-1.60463	0.109184		0.984244	-62.5766	0.453305	-0.873642		1.70448	93.3398	-0.0992988	1.70159		4.17244	-90.3392	-0.0246994	-4.17237		1.7916	117.55	-0.828649	1.58844
1.08996	161.196	-1.03179	0.351321		1.16843	-39.302	0.904153	-0.740093		0.897286	-88.5571	0.0225945	-0.897002		3.39936	-82.5409	0.441299	-3.3706		2.41962	117.313	-1.11025	2.14986
2.61622	170.445	-2.57992	0.434281		1.69763	-163.452	-1.62732	-0.483525		1.00042	0.876349	1.0003	0.015301		3.8888	-69.2856	1.37551	-3.63741		2.34569	83.3231	0.272736	2.32978
1.2712	137.02	-0.929993	0.866638		0.662784	-43.0106	0.484645	-0.452107		0.466363	32.3233	0.394098	0.249363		4.72655	-51.287	2.95607	-3.68807		2.47875	-44.0553	1.7814	-1.72361
0.930419	-36.4301	0.748599	-0.552521		0.779264	133.511	-0.53652	0.565154		3.28533	-47.1499	2.2343	-2.40859		3.41655	-94.7165	-0.280927	-3.40498		1.17051	-87.2971	0.0551988	-1.16921
0.858826	-9.85748	0.846146	-0.147029		2.23404	-39.9253	1.71325	-1.43378		2.01921	-46.8528	1.38089	-1.47321		3.84705	-118.934	-1.86122	-3.36684		2.61373	-9.84325	2.57526	-0.446826
0.846376	81.7694	0.121165	0.837658		2.84981	-25.8708	2.56421	-1.2435		1.34488	-82.448	0.176752	-1.33322		3.66183	-62.5145	1.69003	-3.24851		0.230834	-38.7808	0.179946	-0.144581
1.13257	109.751	-0.382736	1.06594		2.35944	-29.9652	2.04405	-1.17848		1.4169	-59.0027	0.7297	-1.21455		2.99933	-120.215	-1.50938	-2.59186		1.70644	-6.87412	1.69418	-0.204241
0.0934523	-0.417088	0.0934499	-0.000680286		0.901422	-31.1593	0.771376	-0.466413		0.817318	-91.112	-0.015862	-0.817164		4.27015	-36.0162	3.45392	-2.51091		1.91417	-55.7696	1.07676	-1.5826
1.42662	-177.101	-1.42479	-0.0721604		0.664924	-76.4641	0.155628	-0.646455		1.5397	-36.3381	1.24028	-0.912349		2.45086	-51.6911	1.51929	-1.92314		1.43656	-154.794	-1.29977	-0.611803
1.25516	8.48171	1.24143	0.185128		1.71759	-15.0831	1.65842	-0.446949		1.68766	-6.50908	1.67678	-0.191314		1.95133	-110.246	-0.675274	-1.83076		2.79085	-9.02241	2.75631	-0.437663
1.85083	137.644	-1.36772	1.24696		2.50543	-13.6982	2.43417	-0.593303		0.74755	37.6404	0.591954	0.456532		1.60157	-59.5484	0.811695	-1.38065		0.749467	-4.46323	0.747194	-0.058323
1.63823	89.8442	0.00445411	1.63822		2.23735	-13.6576	2.17409	-0.528283		2.34028	16.5357	2.24349	0.666071		0.951694	-66.5872	0.378159	-0.873337		3.28085	1.80329	3.27922	0.103242
2.71338	139.882	-2.07499	1.74839		1.89139	-12.1549	1.84899	-0.398244		1.15926	40.9258	0.875888	0.759408		1.92319	-163.92	-1.84795	-0.532696		0.681402	113.938	-0.276472	0.622794
3.69758	124.499	-2.0943	3.0473		3.36807	-6.79061	3.34444	-0.398244		1.91951	31.3496	1.63927	0.998638		1.9164	164.64	-1.84795	0.507617		0.655025	45.5942	0.458344	0.467952
0.980402	-55.0766	0.561261	-0.803849		1.34428	-0.305575	1.34426	-0.00716939		1.76251	-111.228	-0.638166	-1.64292		0.822624	58.1467	0.434136	0.698739		0.991006	-47.1674	0.673744	-0.726747
0.858818	-116.949	-0.389214	-0.76556		1.83912	12.728	1.79393	0.4052		0.63371	-18.4129	0.601267	-0.200166		1.23104	116.609	-0.551373	1.10065		1.34717	14.6004	1.30366	0.339589
1.65548	-141.717	-1.29949	-1.02564		1.08425	36.3116	0.8737	0.642068		2.80928	-51.4247	1.75171	-2.19627		1.54823	59.2319	0.792019	1.33031		1.65917	166.834	-1.61555	0.377926
0.317253	-15.4852	0.305737	-0.084703		2.43446	-109.761	-0.823099	-2.29109		2.07748	-84.0241	0.216288	-2.06619		2.18666	141.779	-1.71791	1.35287		0.649211	73.866	0.180406	0.623641
1.30227	-2.21558	1.30129	-0.050345		2.58286	-61.9099	1.21617	-2.27862		1.63766	-63.462	0.731692	-1.46511		2.87546	108.222	-0.899141	2.73127		2.11749	141.159	-1.64928	1.32802
1.26467	167.452	-1.23447	0.274753		2.10155	-84.0835	0.216625	-2.09036		1.35713	-138.175	-1.01132	-0.905001		2.11138	-149.304	-1.81554	-1.07782		2.88405	128.852	-1.80918	2.24602
1.84027	165.523	-1.78184	0.46005		2.45505	-121.376	-1.27824	-2.09604		0.75438	-9.5034	0.744027	-0.124553		2.85946	-167.422	-2.79084	-0.622687		1.13669	170.28	-1.12038	0.191905
1.31432	152.845	-1.16945	0.59985		2.70774	-36.5903	2.17409	-1.61405		0.86738	-47.609	0.584776	-0.640613		1.11301	-171.342	-1.10033	-0.16755		2.43063	173.928	-2.41699	0.25711
0.53866	84.8391	0.0484538	0.536476		2.09288	-25.227	1.89327	-0.891998		0.255808	-79.1228	0.0482721	-0.251212		0.321276	153.794	-0.288253	0.141875		0.938313	109.514	-0.313433	0.884416
1.36075	142.095	-1.07367	0.835982		2.00153	-158.59	-1.86341	-0.730627		0.317079	16.2757	0.304371	0.0888644		2.15218	174.064	-2.14064	0.222567		1.62555	144.979	-1.33124	0.932865
2.23415	-137.491	-1.64694	-1.50964		2.79283	-19.1483	2.63831	-0.916088		1.10123	-115.73	-0.478073	-0.99205		3.35598	170.608	-3.31099	0.547664		2.98707	99.5082	-0.493431	2.94603
1.41863	-113.736	-0.571026	-1.29863		1.60787	-18.8807	1.52136	-0.520306		0.199599	-101.622	-0.0402105	-0.195506		1.99895	160.182	-1.88056	0.677703		3.94372	127.345	-2.39233	3.13524
2.4416	-156.093	-2.23212	-0.989485		2.94573	-10.2855	2.89839	-0.525971		0.524401	155.556	-0.477397	0.216999		3.23601	149.937	-2.80069	1.62107		3.35155	-73.7925	0.935474	-3.21835
0.600949	-56.8652	0.328485	-0.503227		1.9144	-13.9326	1.85808	-0.460951		0.721611	41.2174	0.542807	0.475482		2.04519	139.513	-1.55547	1.3279		3.15908	-64.2666	1.37162	-2.84577
1.15163	-5.84478	1.14564	-0.117274		0.637354	-4.58756	0.635312	-0.0509772		2.43496	-29.5536	2.11816	-1.20102		2.09522	119.085	-1.01851	1.831		1.39594	-98.6765	-0.210586	-1.37997
2.16714	176.94	-2.16405	0.115684		1.15091	-6.09198	1.14441	-0.12214		2.53797	-42.7849	1.86264	-1.72391		2.93849	133.724	-2.03104	2.12358		5.3666	-28.7939	4.70306	-2.58488
0.109509	22.1375	0.101437	0.0412665		3.28927	0.973674	3.28879	0.0558945		1.54198	-68.1786	0.573179	-1.4315		3.53714	139.804	-2.7018	2.2829		5.50728	-27.6083	4.8802	-2.5522
1.27561	67.8725	0.480484	1.18166		2.06882	6.84503	2.05407	0.246571		2.87738	-25.505	2.59697	-1.23897		2.56793	-113.552	-1.02609	-2.35402		2.8701	-39.9973	2.19871	-1.84476
1.22977	-73.2465	0.354486	-1.17757		0.61342	129.074	-0.386652	0.476218		1.60197	-29.0182	1.40087	-0.777096		2.59212	-139.157	-1.96095	-1.69522		0.919379	-45.5018	0.64438	-0.655767
1.51861	-29.7703	1.31819	-0.754024		0.449206	52.2452	0.275041	0.35516		0.30878	-43.123	0.225375	-0.211071		1.64063	-83.5362	0.184693	-1.6302		0.861534	-5.1549	0.85805	-0.0774077
2.07197	-10.2632	2.03882	-0.369166		1.63881	18.5348	1.5538	0.520945		2.06599	5.43537	2.0567	0.195696		1.80441	-136.587	-1.31076	-1.24008		0.837393	131.343	-0.553157	0.628685
2.77145	-9.50091	2.73343	-0.457464		3.36415	12.5334	3.28398	0.730051		2.78116	3.10814	2.77707	0.150796		0.959303	-59.6067	0.485342	-0.827469		2.55894	-137.824	-1.8964	-1.71809
0.495499	-131.743	-0.329899	-0.369711		1.40565	100.926	-0.266433	1.38016		2.60676	-135.933	-1.87303	-1.81299		0.563636	-102.1	-0.118152	-0.551113		1.7409	-141.831	-1.36868	-1.07586
0.453774	-27.4932	0.402527	-0.209482		1.58658	58.2149	0.835707	1.34864		1.62054	-87.1236	0.0813215	-1.6185		2.18109	-171.303	-2.15601	-0.329809		1.90943	-173.304	-1.8964	-0.222643
0.608857	165.694	-0.589977	0.150445		1.69538	55.2664	0.965963	1.39328		0.73184	-84.9286	0.0646926	-0.728975		0.011386	73.9797	0.00314228	0.0109438		0.872318	168.931	-0.85609	0.167474
2.05228	14.5339	1.98661	0.515027		2.7871	34.2138	2.30478	1.56713		2.711	-176.341	-2.70547	-0.173018		2.28948	176.862	-2.28605	0.125327		0.697886	32.3776	0.589391	0.373716
2.44209	36.5272	1.9624	1.45354		3.46548	29.0869	3.02843	1.68469		0.694463	-154.126	-0.624848	-0.303057		0.998054	148.934	-0.854909	0.515017		2.12497	149.524	-1.83138	1.07775
1.56406	71.9026	0.485848	1.48669		1.94513	88.8944	0.0375316	1.94477		1.2174	128.13	-0.751679	0.957619		1.00788	-131.981	-0.674162	-0.749221		1.90082	57.5117	1.02098	1.60334
2.36443	78.088	0.488038	2.31351		2.42715	81.4075	0.362629	2.39991		1.11292	-66.8262	0.437957	-1.02312		3.42359	178.86	-3.42291	0.0681022		2.70577	135.567	-1.9321	1.89425
3.21249	51.446	2.00219	2.51223		1.07162	-124.739	-0.610651	-0.880615		1.44647	-47.0817	0.984983	-1.05929		0.738759	103.512	-0.172611	0.718311		2.49108	117.656	-1.15626	2.20648
3.67461	-59.5134	1.86427	-3.16659		0.844885	-98.7478	-0.128495	-0.835057		0.781452	-97.0224	-0.0955389	-0.77559		3.68585	162.677	-3.51866	1.09752		2.90164	-64.5395	1.24738	-2.61984
3.33443	-74.1624	0.910004	-3.20785		1.39425	-144.199	-1.13081	-0.815596		1.17065	-38.0289	0.922119	-0.721188		2.95165	156.575	-2.70837	1.17345		2.42415	-88.5666	0.0606385	-2.42339
3.10323	-31.8314	2.63652	-1.63671		1.74192	-161.403	-1.65096	-0.555518		1.54158	-22.0353	1.42898	-0.578367		1.68003	76.7974	0.383709	1.63562		2.60234	-46.2443	1.79974	-1.87965
4.70064	-55.2751	2.67766	-3.86344		0.900138	-32.1225	0.762339	-0.478632		0.121479	-14.2508	0.117741	-0.0299041		3.0317	139.878	-2.31826	1.95368		1.58028	-103.394	-0.366072	-1.53729
3.92954	-50.3023	2.50994	-3.02349		0.227029	-111.442	-0.082992	-0.211316		1.01479	172.373	-1.00581	0.134683		2.19187	100.46	-0.397918	2.15545		1.34841	-150.318	-1.17148	-0.667722
2.70117	-72.6631	0.80492	-2.57846		1.46527	-173.519	-1.4559	-0.1654		0.996905	160.685	-0.940792	0.329742		2.0034	-62.0036	0.94043	-1.76896		1.92967	-29.2713	1.68328	-0.943505
3.93423	-42.2996	2.90989	-2.64776		0.617787	134.752	-0.434945	0.43873		1.90605	18.832	1.80401	0.61526		1.50289	-104.904	-0.386554	-1.45233		1.40466	-14.1172	1.36224	-0.342605
2.56365	-60.1588	1.27567	-2.22373		1.24734	163.476	-1.19583	0.354756		1.95877	37.8634	1.5464	1.20226		1.20441	-139.66	-0.918028	-0.779638		0.590872	-12.9861	0.57576	-0.132777
3.59685	-33.0491	3.0149	-1.96157		1.10742	99.8891	-0.190189	1.09097		1.40298	-23.9715	1.28197	-0.570004		1.83873	-152.654	-1.63324	-0.844657		1.58043	25.029	1.43202	0.668641
2.10012	-41.4204	1.57483	-1.3894		2.63727	-38.1588	2.07369	-1.62942		0.0531435	-30.3947	0.0458395	-0.0268882		0.58463	-68.7723	0.21168	-0.544963		2.8708	13.2246	2.79467	0.656746
3.12065	-28.1143	2.75244	-1.47055		1.55961	-56.8392	0.853094	-1.30561		2.07669	-8.04682	2.05625	-0.2907		1.35005	-14.0828	1.30947	-0.3285		3.56551	14.9793	3.44435	0.92158
1.57883	-64.0614	0.690593	-1.41979		3.07377	-21.1955	2.86583	-1.11132		0.755369	-166.223	-0.733637	-0.179887		2.09812	-8.37973	2.07572	-0.305765		3.79475	-86.5678	0.227182	-3.78794
3.32212	-15.9441	3.19431	-0.912586		1.21282	-18.0827	1.15292	-0.376446		0.967826	5.87163	0.962748	0.0990086		1.07971	-166.094	-1.04807	-0.259482		3.80229	-110.046	-1.30335	-3.57194
1.78945	-20.0298	1.68121	-0.612901		0.505538	-149.406	-0.435166	-0.257291		1.67838	7.60253	1.66362	0.22205		0.859779	-10.0471	0.846594	-0.149994		3.73227	-125.147	-2.1486	-3.05178
1.1162	-1.53762	1.1158	-0.0299514		1.1556	11.7205	1.1315	0.234746		0.692902	150.589	-0.603598	0.340269		0.558853	93.9993	-0.0389765	0.557492		3.84125	-146.117	-3.18891	-2.14151
1.88059	21.1522	1.75389	0.678607		1.78863	17.7163	1.70381	0.544289		0.873139	84.6215	0.081844	0.869295		1.06457	137.748	-0.787989	0.715811		1.84688	-118.305	-0.87573	-1.62605
2.73003	-116.695	-1.22643	-2.43904		3.50523	10.1128	3.45077	0.615475		2.66982	23.609	2.44635	1.06924		0.956877	58.3174	0.502564	0.814274		1.1012	-86.9537	0.0585212	-1.09964
2.40816	-134.289	-1.68157	-1.72383		1.6592	40.883	1.25444	1.08598		2.02077	46.581	1.38893	1.46778		1.22547	111.57	-0.450518	1.13965		0.0622018	0.921921	0.0621938	0.00100082
2.89786	-148.16	-2.4618	-1.52877		3.0866	22.3539	2.85465	1.17392		1.90131	88.7263	0.0422627	1.90084		0.0922574	-41.0818	0.0695411	-0.0606256		2.99783	-98.24	-0.429647	-2.96689
1.76852	-124.005	-0.989078	-1.46608		1.08004	69.6917	0.37485	1.0129		3.04076	-102.489	-0.657556	-2.96882		0.876242	177.202	-0.875197	0.042776		2.32489	-49.7986	1.50067	-1.77571
1.89427	-163.011	-1.81161	-0.553479		3.07406	38.1058	2.4189	1.89705		2.54201	-59.1622	1.30306	-2.18262		0.690805	-1.4474	0.690585	-0.0174492		1.37328	-54.5543	0.796409	-1.11876
3.24219	179.44	-3.24204	0.031697		3.34937	-56.6199	1.84279	-2.79686		1.93819	-107.08	-0.569249	-1.85271		1.32574	150.001	-1.14814	0.662859		0.734328	-63.2679	0.330315	-0.655843
0.623413	145.088	-0.511216	0.356795		3.01821	-59.2524	1.54308	-2.59393		1.83	-132.772	-1.24273	-1.34333		1.03056	94.4759	-0.0804256	1.02742		2.04321	-121.886	-1.07928	-1.73489
2.64994	163.924	-2.54632	0.733793		2.70961	-79.0268	0.515776	-2.66007		1.14888	-62.0841	0.537878	-1.01519		1.51604	56.7586	0.831046	1.26797		1.38689	-166.638	-1.34935	-0.320508
1.98523	155.859	-1.81161	0.811931		3.91412	-39.783	3.0079	-2.50458		1.90102	-34.6828	1.56324	-1.08174		2.68361	110.509	-0.940216	2.51352		0.56913	179.538	-0.569112	0.00458961
3.00441	145.024	-2.4618	1.7222		3.26048	-29.3122	2.84303	-1.59622		1.06872	-99.3581	-0.173779	-1.0545		1.64036	-131.192	-1.08032	-1.23437		0.991367	0.21013	0.99136	0.00363579
2.2416	117.431	-1.03267	1.98956		2.0489	-55.3144	1.16597	-1.68478		1.05187	-54.0075	0.61816	-0.851059		1.36464	-88.95	0.0250075	-1.36441		4.59061	-68.6852	1.66865	-4.2766
4.10824	142.885	-3.27603	2.47896		3.53254	-18.6814	3.34642	-1.13149		1.75245	-5.51555	1.74433	-0.168438		0.608423	-88.6216	0.0146354	-0.608247		4.13927	-94.947	-0.35695	-4.12386
3.46828	129.37	-2.20002	2.6812		1.3334	-27.6337	1.1813	-0.618454		1.60144	-108.821	-0.516657	-1.51581		0.563872	-47.5697	0.380441	-0.416193		3.55144	-104.923	-0.914569	-3.43166
1.00933	-82.0432	0.139717	-0.999613		0.544563	-38.5393	0.425947	-0.339291		0.944674	-90.1037	-0.00170981	-0.944672		2.27389	-171.806	-2.25068	-0.324097		3.23748	-50.5642	2.05649	-2.50043
0.778686	-13.4127	0.757447	-0.180627		3.67292	-7.52033	3.64132	-0.480704		1.1763	-175.268	-1.17229	-0.097044		0.967816	147.57	-0.816878	0.519016		2.55514	-59.433	1.2994	-2.20006
1.31311	-6.18218	1.30547	-0.141409		3.63672	-4.76448	3.62415	-0.302066		1.87424	-96.7352	-0.219813	-1.86131		1.27048	132.201	-0.853415	0.941168		1.77721	-81.4391	0.264556	-1.75741
2.61057	0.8123	2.61031	0.0370097		0.271023	-167.363	-0.264458	-0.0592924		1.15443	-168.213	-1.13009	-0.23582		2.73222	157.988	-2.53305	1.02404		1.1667	-135.343	-0.829914	-0.820022
2.16207	6.91397	2.14635	0.260268		2.74644	7.71622	2.72157	0.368755		0.566335	142.749	-0.450797	0.342807		1.5031	39.1166	1.1662	0.948304		1.01133	-35.9049	0.819166	-0.593084
1.1692	101.102	-0.225134	1.14732		1.80922	15.1208	1.74658	0.471942		0.0309185	22.2719	0.0286118	0.0117182		2.53291	-117.629	-1.1746	-2.24408		2.07629	-8.76758	2.05203	-0.316482
1.81682	129.8	-1.16296	1.39584		2.70103	9.82418	2.66142	0.460864		2.14372	-170.958	-2.11707	-0.336919		1.74903	-119.058	-0.849507	-1.52887		1.78533	9.52372	1.76073	0.295394
2.57271	36.0946	2.07886	1.51563		3.69539	11.9872	3.61481	0.767506		2.66422	171.837	-2.63723	0.378295		2.44218	-143.173	-1.95484	-1.46385		0.290887	42.2889	0.215187	0.195729
2.44938	89.7999	0.00855348	2.44937		0.909411	69.3496	0.320718	0.850981		1.77224	-51.5576	1.10185	-1.38808		1.40772	-137.904	-1.04457	-0.943694		1.48164	155.611	-1.34942	0.611823
3.00657	-79.9253	0.525942	-2.96021		3.23065	15.2724	3.11656	0.850981		2.28777	-22.0769	2.12003	-0.859861		0.658459	-153.53	-0.589429	-0.293499		1.19974	75.1924	0.306622	1.15989
2.87756	-74.8446	0.752301	-2.77748		2.15099	24.4866	1.95753	0.891545		1.73919	-18.5302	1.64903	-0.552724		1.59167	169.441	-1.56472	0.291676		1.87955	113.992	-0.764246	1.71715
1.74256	-70.5088	0.581427	-1.6427		1.36189	73.5465	0.385737	1.30612		0.688909	-37.7801	0.544491	-0.422048		0.0318833	69.3968	0.0112196	0.029844		0.885635	-118.832	-0.427089	-0.775851
0.982046	-86.3327	0.0628136	-0.980035		1.43616	87.6868	0.0579665	1.43499		2.86537	-39.7637	2.20258	-1.83276		1.30231	146.057	-1.08039	0.727166		1.01654	-67.4518	0.389801	-0.938829
0.921595	-28.9741	0.806247	-0.446434		3.51795	24.4689	3.20199	1.45713		1.17251	-83.4715	0.133311	-1.1649		2.43168	-46.7055	1.66752	-1.76987		1.91671	-15.3376	1.84844	-0.506983
2.08793	-11.9983	2.04232	-0.434044		2.68105	39.2479	2.07624	1.69623		2.03514	-22.8526	1.87539	-0.79037		2.62731	-9.38161	2.59216	-0.428275		1.13813	10.5193	1.119	0.207784
2.10471	-8.29348	2.0827	-0.30359		1.83522	65.2772	0.767543	1.66701		0.0460573	75.4225	0.0115922	0.0445746		0.22785	-114.127	-0.093136	-0.207945		1.18403	60.5591	0.581984	1.03113
1.11467	9.79686	1.09842	0.189668		1.96293	110.831	-0.698032	1.83462		1.25208	-118.576	-0.598902	-1.09955		2.64397	3.76578	2.63826	0.17365		4.69006	-87.3058	0.220458	-4.68488
2.15561	-3.06998	2.15252	-0.115445		1.84532	95.821	-0.187153	1.83581		0.922491	-56.8186	0.504872	-0.772072		1.38948	21.3068	1.29451	0.504884		4.24085	-109.385	-1.40759	-4.00044
3.352	-69.9727	1.14795	-3.1493		2.30508	94.7279	-0.189992	2.29724		0.84104	-86.5035	0.0512932	-0.839474		1.85913	29.6075	1.61639	0.918514		3.45481	-115.233	-1.47279	-3.12515
2.93859	-102.941	-0.658107	-2.86395		3.88934	37.336	3.09239	2.35884		1.57421	179.79	-1.57419	0.00577951		1.62465	-30.7224	1.39664	-0.83		2.93335	-82.4287	0.386498	-2.90778
2.78062	-51.4799	1.73174	-2.17553		3.06008	64.602	1.31248	2.76433		0.666559	-174.901	-0.663921	-0.05924		2.36954	-15.9454	2.27837	-0.650964		3.10288	-43.9589	2.23357	-2.15384
2.09358	-93.6734	-0.134134	-2.08928		3.68304	52.653	2.23428	2.92793		0.501148	29.4389	0.43644	0.246312		0.845775	-40.729	0.640932	-0.551853		1.34368	-117.26	-0.615443	-1.19445
1.80536	-46.3153	1.24694	-1.30555		3.47447	77.6543	0.742875	3.39413		1.09681	147.399	-0.923999	0.590955		0.845405	-4.75327	0.842497	-0.0700545		0.701609	147.648	-0.592704	0.375444
1.64533	-69.736	0.569855	-1.5435		4.05127	59.9006	2.03172	3.50498		0.515118	-103.813	-0.122985	-0.500221		1.36085	3.38494	1.35848	0.0803501		0.988563	120.057	-0.495127	0.855632
1.85187	-107.771	-0.565213	-1.76351		1.8076	-54.2757	1.05543	-1.46748		0.285601	118.585	-0.136651	0.250788		0.162491	39.5881	0.125223	0.10355		2.11144	145.852	-1.74741	1.18523
2.58967	-142.724	-2.06066	-1.56845		1.46564	-18.8027	1.38743	-0.472393		2.7419	158.259	-2.54686	1.01563		2.1196	12.6149	2.06844	0.462914		1.86236	-61.95	0.875761	-1.6436
1.92387	-137.15	-1.41047	-1.30837		0.177451	16.4465	0.17019	0.0502398		1.89523	133.033	-1.29334	1.38534		1.36253	-43.4211	0.989633	-0.936539		1.20943	-138.222	-0.901913	-0.805777
1.16152	-111.35	-0.422859	-1.08181		1.05608	-2.01027	1.05543	-0.037046		2.17564	126.429	-1.29195	1.75051		0.60953	-72.637	0.181899	-0.581756		0.308411	51.1439	0.193487	0.240167
0.946668	-54.6548	0.547649	-0.77218		1.72015	7.44986	1.70563	0.223032		1.51408	-124.502	-0.857638	-1.24776		1.03606	-171.441	-1.02452	-0.154189		4.7725	-51.4857	2.97188	-3.73425
1.73045	-152.903	-1.54051	-0.788219		0.8702	23.9372	0.795355	0.353071		0.937029	-135	-0.66258	-0.66258		0.247683	170.502	-0.244288	0.0408694		2.70203	-83.1489	0.322322	-2.68273
3.10648	-167.768	-3.03595	-0.65818		2.42919	19.4331	2.2908	0.808208		0.693569	-8.41361	0.686105	-0.101482		0.90521	27.9782	0.799414	0.424667		4.67119	-32.1617	3.95439	-2.48652
3.31999	-173.113	-3.29603	-0.398102		2.71796	22.4269	2.51239	1.03691		2.71877	-122.272	-1.45165	-2.29879		1.76619	149.422	-1.52058	0.898483		3.90166	-45.7471	2.72268	-2.79463
0.0457594	-58.3793	0.0239914	-0.0389659		1.24094	54.9388	0.71286	1.01576		3.14235	-151.844	-2.77051	-1.48278		1.20066	145.999	-0.995382	0.671409		3.25141	-50.5275	2.06695	-2.50986
3.23739	-176.404	-3.23101	-0.203043		3.35721	20.9124	3.13606	1.19832		3.23776	-167.468	-3.16062	-0.702548		1.31274	-41.6171	0.981404	-0.871856		2.89951	-68.4979	1.06277	-2.69772
0.836754	-170.506	-0.825291	-0.138024		2.07308	52.9003	1.25049	1.65346		0.451601	-61.2038	0.217534	-0.395755		2.84812	-8.88232	2.81396	-0.439765		2.11266	-84.1212	0.216388	-2.10155
3.13263	165.728	-3.03595	0.772249		3.84244	-74.4806	1.0281	-3.70234		1.18688	-164.738	-1.14502	-0.312431		1.71621	25.1324	1.55373	0.728892		2.82891	-69.4573	0.99268	-2.64902
0.808718	96.9556	-0.0979354	0.802766		3.79437	-61.702	1.79875	-3.34092		2.00887	172.197	-1.99027	0.272744		2.51367	19.1782	2.37417	0.825759		2.87157	-49.3535	1.87051	-2.17878
1.75056	125.653	-1.02035	1.42244		3.62744	-51.3084	2.26762	-2.8313		4.05664	159.162	-3.79129	1.44305		2.44139	-28.1589	2.15243	-1.15214		1.9721	-99.1083	-0.312187	-1.94723
0.369824	-76.4428	0.0866927	-0.35952		2.98997	-98.4588	-0.439822	-2.95745		2.11487	121.905	-1.11772	1.79537		1.10464	-61.2591	0.531164	-0.96855		2.67399	-19.3971	2.52222	-0.888067
0.737523	2.02136	0.737064	0.026014		2.89413	-97.5643	-0.380979	-2.86894		1.34909	10.2923	1.32738	0.24104		2.92514	8.27992	2.89465	0.421248		1.20802	-41.4187	0.905888	-0.799172
1.2233	151.806	-1.07815	0.577967		2.72567	-65.5638	1.12755	-2.48151		1.94873	-68.7836	0.705231	-1.81665		2.39385	33.1962	2.00317	1.31065		0.110254	-70.9511	0.0359842	-0.104217
1.94356	159.935	-1.82559	0.666804		3.8351	-41.6331	2.86641	-2.54788		1.31132	-95.3145	-0.121459	-1.30569		0.448743	167.765	-0.438551	0.0950964		0.624946	1.47732	0.624738	0.0161119
0.561535	53.1878	0.336468	0.449567		2.64985	-79.9093	0.464274	-2.60886		0.963057	-36.1491	0.777654	-0.568097		0.528666	-3.18488	0.52785	-0.0293716		1.66769	-83.3393	0.193433	-1.65643
2.50044	140.482	-1.92891	1.59107		3.28446	-49.0004	2.15478	-2.47882		1.54406	-14.1058	1.4975	-0.376308		1.24332	3.86142	1.2405	0.0837296		1.71599	-116.497	-0.765582	-1.53574
1.85735	78.9631	0.355572	1.823		2.37757	-68.9394	0.854391	-2.21875		2.37484	-101.811	-0.486103	-2.32456		1.25941	148.141	-1.06967	0.664758		2.179	-135.187	-1.54582	-1.53574
2.8474	121.171	-1.47378	2.43632		2.61273	-53.0762	1.56961	-2.08871		2.34194	-75.0363	0.604703	-2.26252		2.18864	151.106	-1.91619	1.05753		0.912816	-33.2813	0.763102	-0.500908
2.60848	67.5197	0.997393	2.41027		3.51172	-31.5093	2.99394	-1.83536		1.57919	-84.7314	0.145009	-1.57252		1.13882	83.8048	0.122897	1.13217		2.56475	-151.834	-2.26103	-1.21064
3.27425	-101.142	-0.632707	-3.21254		2.15031	-103.748	-0.511018	-2.08871		2.13799	-124.289	-1.20447	-1.76642		0.844673	-86.5274	0.0511629	-0.843122		0.939148	-130.071	-0.604563	-0.718681
2.28548	-104.372	-0.567291	-2.21396		1.71163	-107.371	-0.511018	-1.63357		2.32813	-53.1969	1.3947	-1.86413		0.587589	-23.4038	0.539247	-0.233396		0.368846	-73.7195	0.103403	-0.354056
3.10754	-135.858	-2.23001	-2.16422		2.00229	-47.5661	1.35102	-1.4778		1.16081	-91.6857	-0.0341469	-1.16031		0.704172	13.5084	0.684691	0.164486		2.16209	-170.27	-2.13099	-0.365391
1.90736	-86.6731	0.110688	-1.90414		3.05969	-33.7211	2.5449	-1.69859		1.30686	-154.948	-1.18392	-0.553383		0.657078	95.757	-0.0659108	0.653764		0.351826	40.8353	0.266189	0.230055
2.24525	-119.733	-1.11354	-1.94966		2.338	-28.5561	2.05358	-1.11761		1.47085	-20.0824	1.38142	-0.505048		1.85223	128.335	-1.14886	1.45288		1.50999	149.208	-1.29713	0.772999
3.12827	-146.884	-2.62013	-1.70908		3.0784	-17.4412	2.93688	-0.922679		0.827938	7.19641	0.821416	0.103717		1.43555	178.196	-1.43484	0.045183		3.26671	-129.246	-2.06669	-2.52987
1.67976	-101.833	-0.344449	-1.64406		0.921346	-82.4381	0.121247	-0.913333		0.711057	138.903	-0.53585	0.467404		0.249499	-143.079	-0.199467	-0.149875		1.60463	-95.7508	-0.160788	-1.59656
1.53304	-79.0416	0.291427	-1.50509		1.11932	-47.2299	0.760081	-0.821673		1.14685	-15.7875	1.10358	-0.312022		0.719299	22.2327	0.665822	0.272161		2.79574	-144.122	-2.26528	-1.63849
1.07337	-73.8943	0.297763	-1.03124		2.10791	-92.607	-0.0958802	-2.10573		1.28705	-148.945	-1.10258	-0.663932		0.642756	65.2421	0.269176	0.583677		2.47148	-156.429	-2.26528	-0.988296
2.38182	-151.844	-2.09998	-1.12391		2.43456	-123.227	-1.33402	-2.03653		2.2814	4.19264	2.27529	0.166793		1.88522	152.284	-1.66892	0.876782		0.38524	-118.641	-0.184655	-0.338101
1.40218	-160.255	-1.31974	-0.473714		2.53731	-141.446	-1.98422	-1.58139		2.6549	-108.279	-0.832706	-2.52093		1.08633	42.8283	0.796708	0.73849		0.766529	122.347	-0.410133	0.647578
0.53137	-47.0895	0.361786	-0.389185		1.20216	-74.1582	0.32817	-1.15651		2.23396	-136.221	-1.61294	-1.54564		1.3727	135.673	-0.981976	0.959188		4.24084	-153.968	-3.81061	-1.86118
0.631117	11.2046	0.619088	0.122634		0.973929	-119.435	-0.478626	-0.848207		2.62869	-147.974	-2.22862	-1.39401		2.19167	83.8836	0.23352	2.17919		2.40974	-155.065	-2.18512	-1.01593
0.0651346	61.1268	0.0314517	0.0570378		3.02575	-178.372	-3.02453	-0.0859453		1.63844	-138.274	-1.22282	-1.0905		3.49303	-146.862	-2.92492	-1.90947		2.38211	-166.384	-2.31516	-0.560793
1.60678	-81.7568	0.230371	-1.59018		0.0396096	-148.109	-0.0336308	-0.0209258		0.0808284	74.2432	0.0219494	0.0777911		2.00486	-115.464	-0.861992	-1.81009		3.88605	175.802	-3.87563	0.28446
1.39872	-83.5391	0.15739	-1.38984		1.0845	-171.998	-1.07394	-0.150965		3.98949	-108.391	-1.25871	-3.78572		2.4127	-138.953	-1.81959	-1.58437		2.45007	174.872	-2.44026	0.218998
1.50163	-64.8508	0.638158	-1.35928		1.53297	175.918	-1.52908	0.109113		3.48523	-94.4332	-0.269395	-3.47481		1.50761	-161.473	-1.42947	-0.479041		0.826908	-4.33668	0.824541	-0.0625284
1.58154	-114.969	-0.667604	-1.43372		3.74133	178.329	-3.73974	0.109113		4.31412	-130.804	-2.81918	-3.26556		2.37609	-169.965	-2.33975	-0.414021		0.58736	-133.613	-0.405151	-0.425258
0.903369	-104.407	-0.224766	-0.874961		0.869547	113.518	-0.346975	0.79732		2.70537	-80.8486	0.430273	-2.67093		0.913655	-174.415	-0.909317	-0.0889237		1.10491	137.882	-0.819587	0.741011
1.32791	-28.0046	1.17242	-0.623509		4.41541	166.737	-4.29765	1.01296		2.74954	-139.925	-2.10396	-1.77011		3.6512	-175.539	-3.64014	-0.283982		1.77787	29.9021	1.5412	0.886303
0.39653	51.6763	0.24589	0.311086		1.67044	127.305	-1.01238	1.32871		2.46385	-134.075	-1.71385	-1.77011		0.156748	-145.437	-0.129083	-0.0889237		1.68561	128.324	-1.04526	1.32239
1.36205	19.9444	1.28036	0.464605		5.00009	156.489	-4.585	1.99468		2.54762	-93.2729	-0.145446	-2.54346		2.67382	-175.303	-2.66484	-0.218963		1.29986	65.0059	0.549223	1.17813
1.29582	110.885	-0.46195	1.21068		2.96095	130.404	-1.9192	2.25476		1.98075	-112.398	-0.754741	-1.83132		0.540622	50.2375	0.345786	0.415577		1.81672	98.1168	-0.256507	1.79852
2.4539	-27.4949	2.17674	-1.13289		2.77839	120.207	-1.39786	2.40113		1.84032	-96.5669	-0.210466	-1.82825		1.68057	154.128	-1.51212	0.733348		2.13302	54.6768	1.23329	1.74034
2.72621	-11.9252	2.66738	-0.563331		4.50667	146.081	-3.73974	2.51483		0.796233	-61.4687	0.380312	-0.699535		0.953543	89.9548	0.000752599	0.953543		2.56479	54.3435	1.49508	2.08396
3.55402	-8.68118	3.51331	-0.53643		1.13999	-101.006	-0.217644	-1.11902		0.808853	-117.233	-0.370143	-0.719192		1.24228	111.654	-0.458393	1.15461		0.401277	152.14	-0.354764	0.187524
1.23588	-15.6618	1.19	-0.333636		0.961708	-124.357	-0.542742	-0.793922		1.88311	-68.699	0.684071	-1.75446		3.5906	160.282	-3.38006	1.21147		0.793246	73.9565	0.219227	0.762351
2.15406	-2.34716	2.15225	-0.088218		2.08506	-23.3148	1.91481	-0.825234		1.68902	-80.2278	0.286678	-1.66451		0.731788	-146.451	-0.609883	-0.404421		1.48012	42.3791	1.09337	0.997651
0.832413	4.80399	0.829489	0.0697124		2.25314	1.30512	2.25255	0.0513188		0.779504	-2.10625	0.778978	-0.0286489		3.41458	174.786	-3.40045	0.310312		1.54707	110.734	-0.547721	1.44687
1.42537	4.96431	1.42003	0.123345		1.25213	19.0587	1.18349	0.408866		0.444107	152.136	-0.392618	0.207562		1.22007	165.422	-1.18079	0.307083		2.07643	50.9888	1.30705	1.61343
2.8042	6.36009	2.78694	0.31064		0.886965	127.728	-0.542742	0.701526		1.34108	16.0736	1.28865	0.371306		1.11264	119.205	-0.542898	0.971197		3.13778	72.0146	0.968869	2.98445
1.52462	49.0051	1.00014	1.15073		2.35825	25.2166	2.13352	1.00471		2.36716	-74.7961	0.6208	-2.2843		2.40065	154.698	-2.17035	1.02601		2.98355	10.0631	2.93765	0.521325
1.26543	-82.5534	0.164002	-1.25475		1.49766	98.0094	-0.208677	1.48305		2.77539	-47.5495	1.87326	-2.04785		1.43012	65.1585	0.600809	1.2978		2.56782	16.8911	2.45704	0.746092
0.500606	14.661	0.484307	0.126703		2.64703	-107.196	-0.782588	-2.5287		2.13699	-50.4396	1.36103	-1.64752		1.54187	113.3	-0.609883	1.41612		0.689054	104.251	-0.169622	0.66785
1.66383	4.91996	1.6577	0.142696		2.20616	-108.548	-0.701791	-2.09156		2.64725	-30.9693	2.26987	-1.36222		3.91296	152.11	-3.45847	1.83036		1.8248	26.337	1.63539	0.809574
0.78346	96.14	-0.0837971	0.778966		2.63782	-142.154	-2.08298	-1.61843		1.06533	-84.6946	0.0985058	-1.06077		1.80613	102.092	-0.378356	1.76606		4.43007	-68.0705	1.65448	-4.10953
1.08698	-136.159	-0.784003	-0.752907		2.07063	-139.004	-1.56282	-1.35835		2.82351	-19.4171	2.66292	-0.938656		3.18611	131.36	-2.10533	2.39142		3.03143	-78.9457	0.581245	-2.97519
1.93716	-167.241	-1.88933	-0.42781		1.42337	-85.301	0.116603	-1.41859		1.60053	6.98209	1.58866	0.194559		0.65398	-5.63594	0.650819	-0.0642256		3.29694	-62.7935	1.50736	-2.93218
0.929305	-169.602	-0.914042	-0.167731		1.48971	-52.6154	0.904494	-1.18369		3.22757	3.60192	3.22119	0.202769		0.0299153	73.3499	0.00857152	0.028661		2.21492	-89.6723	0.0126661	-2.21489
0.590409	-3.33708	0.589408	-0.0343678		1.51167	-121.178	-0.782588	-1.29333		0.0989399	36.0148	0.080029	0.0581761		1.63953	136.519	-1.18964	1.1282		2.59163	-29.8484	2.24783	-1.28987
0.129193	48.2733	0.085988	0.0964204		2.03439	-153.642	-1.8229	-0.903212		2.60149	17.351	2.48311	0.77583		2.72103	140.599	-2.10259	1.72717		1.88378	-70.0361	0.643176	-1.77058
1.94266	19.1203	1.83549	0.636324		3.07588	-166.69	-2.99325	-0.708154		0.599318	-26.205	0.537721	-0.264649		1.67186	92.6187	-0.076385	1.67011		1.44398	-125.339	-0.835208	-1.17792
1.20399	30.147	1.04113	0.604665		1.14674	-133.035	-0.782588	-0.838193		0.16665	-121.739	-0.0876667	-0.141728		2.60712	73.8261	0.726224	2.50394		0.914504	-52.1148	0.56158	-0.721765
1.00449	77.2493	0.2217	0.979718		0.63296	-60.8267	0.308538	-0.552669		2.3423	56.5637	1.29063	1.95465		2.88759	91.5686	-0.0790456	2.8865		0.138797	94.531	-0.0109647	0.138364
1.62723	47.2658	1.10424	1.19521		1.45643	-16.7044	1.39497	-0.418628		2.01174	-109.766	-0.680314	-1.89322		3.63642	119.829	-1.80878	3.15466		1.19111	16.7378	1.14065	0.34303
1.53863	110.351	-0.535086	1.44259		1.04697	-150.655	-0.912627	-0.513095		2.3954	-143.105	-1.91568	-1.43808		3.86444	97.2353	-0.486703	3.83367		1.13103	59.1593	0.579827	0.971099
1.85469	63.0184	0.841484	1.65281		0.878315	-35.7452	0.712861	-0.513095		2.3017	-156.497	-2.11074	-0.917922		1.75024	-90.6898	-0.0210711	-1.75011		0.842196	-11.7978	0.824404	-0.172194
1.99543	93.4216	-0.119093	1.99188		0.412332	-113.777	-0.166245	-0.377333		2.32709	-109.302	-0.769217	-2.19628		1.14116	-58.7041	0.592784	-0.975115		0.710212	140.243	-0.545986	0.454202
2.40923	58.6828	1.25226	2.05821		0.361164	-44.4719	0.257724	-0.253017		2.69353	-137.073	-1.97226	-1.83448		2.19847	-143.911	-1.7766	-1.29497		1.39075	128.592	-0.867508	1.08702
2.25262	80.9772	0.353271	2.22475		2.18421	160.876	-2.06367	0.71558		1.85778	-146.323	-1.546	-1.03016		2.30013	-176.894	-2.29675	-0.124621		2.04054	136.846	-1.48862	1.39564
2.86557	109.543	-0.958592	2.70048		0.586839	54.3631	0.341919	0.476939		0.760809	-125.676	-0.443709	-0.618023		0.363421	69.3045	0.128433	0.33997		1.9289	75.1236	0.495214	1.86425
3.5885	-98.3656	-0.522087	-3.55032		0.789785	85.4491	0.0626659	0.787295		0.870514	-174.796	-0.866927	-0.0789523		1.24754	145.825	-1.03213	0.700769		3.21685	-131.763	-2.14258	-2.39948
3.23124	-93.4952	-0.19699	-3.22522		1.56882	39.2179	1.21544	0.991923		0.0257652	49.6859	0.0166695	0.0196462		2.51379	164.882	-2.42679	0.655613		2.16173	-51.7822	1.33736	-1.69839
2.04167	-99.1097	-0.323248	-2.01592		1.66937	51.5547	1.03796	1.30745		0.734009	87.0152	0.0382204	0.733013		1.56705	110.185	-0.540705	1.47081		2.66457	-39.5883	2.05343	-1.69804
3.4786	-46.9698	2.37374	-2.54283		0.548996	-109.383	-0.182197	-0.517881		1.93261	146.472	-1.61105	1.06747		2.64355	138.231	-1.97166	1.76094		2.37798	-125.029	-1.36493	-1.94724
3.01487	-45.5294	2.11205	-2.15144		0.620204	-32.7534	0.521595	-0.335546		3.293	-98.9929	-0.514738	-3.25252		2.0726	119.133	-1.00901	1.8104		0.841907	-89.9675	0.000478085	-0.841907
2.75757	-141.15	-2.14757	-1.72978		0.935806	-166.129	-0.908516	-0.224347		1.81371	-99.6147	-0.302929	-1.78824		2.16859	-132.117	-1.45437	-1.6086		1.15075	-163.764	-1.10485	-0.321751
2.14728	-131.84	-1.43236	-1.59974		0.847764	9.03877	0.837237	0.133186		3.01089	-33.9875	2.49651	-1.68312		2.36898	-30.4702	2.04181	-1.20129		0.714744	179.732	-0.714736	0.00334659
2.78412	-30.115	2.40832	-1.3969		1.30505	160.955	-1.23361	0.425848		1.66005	-38.9193	1.29158	-1.04289		1.72123	-48.3178	1.14461	-1.28549		1.73616	9.25288	1.71357	0.279161
2.01339	-39.2778	1.55854	-1.27464		1.44456	-130.33	-0.934912	-1.10123		2.02227	-21.4879	1.88171	-0.740767		1.20754	-106.89	-0.350834	-1.15545		0.554417	48.1358	0.37	0.41289
1.14856	-109.958	-0.392048	-1.07958		2.06534	-171.059	-2.04024	-0.320991		2.1501	-27.6667	1.90427	-0.99835		1.09162	-49.5254	0.708584	-0.830391		2.68124	-162.026	-2.55039	-0.827373
1.74216	-141.707	-1.36734	-1.07958		0.75085	153.996	-0.674834	0.329204		1.06099	-60.0713	0.52935	-0.919502		2.12058	-173.361	-2.10636	-0.245178		1.2962	156.712	-1.19059	0.512466
2.22632	-23.2631	2.04533	-0.879293		1.9453	150.272	-1.68928	0.964629		1.70615	-137.704	-1.262	-1.14818		0.83054	-153.142	-0.740951	-0.375217		0.672649	123.868	-0.374854	0.558517
1.05951	-42.0567	0.786665	-0.709727		3.60222	-121.066	-1.85882	-3.08558		0.600946	-133.906	-0.416746	-0.432965		1.08255	5.39499	1.07775	0.101783		2.20609	153.933	-1.98168	0.969423
2.00585	-14.6258	1.94085	-0.506487		2.23687	-99.4088	-0.365679	-2.20678		2.08669	-11.8223	2.04243	-0.427515		0.695108	109.771	-0.235131	0.654132		2.32488	-68.2341	0.862102	-2.15913
1.55402	-16.3197	1.4914	-0.436675		1.57037	-55.61	0.886978	-1.29589		2.13773	8.77752	2.11269	0.326214		1.73269	-20.834	1.61939	-0.61625		3.05032	-45.4737	2.13899	-2.17466
0.198666	155.26	-0.180432	0.0831403		1.49996	-129.763	-0.959399	-1.15301		0.599955	52.8572	0.362255	0.478244		2.17327	-2.78239	2.17071	-0.105497		1.87993	-89.3288	0.0220227	-1.8798
1.43138	15.3352	1.38041	0.37855		0.987968	-129.741	-0.631632	-0.759685		2.46696	-130.859	-1.61388	-1.86583		0.515667	156.306	-0.472198	0.207224		3.36108	-23.2456	3.08823	-1.32653
0.913393	27.7322	0.808474	0.425038		0.373117	-87.5586	0.0158937	-0.372779		2.47106	-160.484	-2.32909	-0.825516		1.01679	167.946	-0.994373	0.212334		1.57862	-38.0366	1.24335	-0.97269
2.34692	-117.481	-1.08301	-2.0821		1.21315	-162.105	-1.15446	-0.372779		3.05938	-166.86	-2.97929	-0.695477		1.13699	46.3797	0.784381	0.823097		1.91161	-26.9418	1.70414	-0.866124
2.0505	-80.6641	0.332635	-2.02334		0.708941	-20.023	0.666089	-0.242739		1.97403	-169.186	-1.93897	-0.370379		3.05935	21.3603	2.8492	1.11431		0.4744	-49.9249	0.305414	-0.363011
1.78268	-116.84	-0.804875	-1.59064		1.39269	-7.33146	1.3813	-0.17772		1.02359	122.691	-0.552856	0.86145		1.26781	97.6088	-0.167869	1.25665		1.41241	-37.8902	1.11466	-0.867431
2.00195	-41.3457	1.50294	-1.32249		1.36182	26.8619	1.21488	0.615329		1.14288	-103.472	-0.266256	-1.11144		2.88423	35.1301	2.35886	1.65968		2.95841	6.88776	2.93706	0.354786
1.2357	-98.342	-0.179277	-1.22263		0.866379	85.6252	0.0660872	0.863854		1.8395	-165.256	-1.77893	-0.46814		1.92836	78.4217	0.387034	1.88912		1.95132	25.2033	1.76556	0.830935
0.104983	-87.313	0.0049216	-0.104868		1.20195	125.855	-0.704021	0.974184		0.298592	29.782	0.259154	0.148311		3.34453	41.2535	2.51441	2.20536		1.52655	71.7816	0.477259	1.45002
3.19097	-53.5236	1.897	-2.56586		1.14232	68.3308	0.421797	1.06159		1.87018	166.516	-1.81863	0.436061		2.9076	48.9143	1.91083	2.19153		2.09796	58.1893	1.10586	1.78283
2.84457	-56.4546	1.57191	-2.3708		2.13025	-73.1983	0.61577	-2.03931		2.4033	124.649	-1.3664	1.97707		2.55732	89.4059	0.0265172	2.55718		3.12288	-92.0223	-0.110203	-3.12094
2.09824	-72.0775	0.645693	-1.99642		2.81801	-130.811	-1.84174	-2.13287		2.15889	-42.2748	1.59742	-1.45226		2.70814	72.8846	0.797001	2.58821		3.42741	-106.074	-0.948952	-3.29342
3.16448	-27.446	2.80831	-1.45855		2.68579	-139.432	-2.04022	-1.74671		4.03575	-19.3952	3.80672	-1.3402		2.57106	-134.071	-1.7883	-1.84725		2.5618	-136.743	-1.86573	-1.75553
1.28221	-76.4416	0.300595	-1.24648		1.69052	-118.431	-0.804846	-1.48663		1.60727	-36.4426	1.29297	-0.954743		3.34835	-162.013	-3.18469	-1.034		2.13044	-144.559	-1.73569	-1.23537
2.10372	-47.8074	1.41291	-1.55862		1.11175	-105.914	-0.304829	-1.06914		2.12892	-35.4744	1.73374	-1.23549		3.60866	-166.557	-3.50979	-0.838941		0.881378	-60.6671	0.431772	-0.768375
0.290405	-64.0084	0.127267	-0.261033		0.511932	-92.7556	-0.0246119	-0.51134		3.25445	-23.702	2.97993	-1.30822		1.37723	-138.977	-1.03905	-0.903961		0.328222	-87.0892	0.0166677	-0.327799
2.17615	176.992	-2.17315	0.114201		1.17337	-164.363	-1.12994	-0.316281		4.09404	-3.5281	4.08628	-0.251939		1.76567	-163.081	-1.68924	-0.513843		1.40098	153.081	-1.24918	0.634268
0.233108	14.9523	0.225216	0.0601453		3.03205	-174.012	-3.01551	-0.316281		1.30866	-131.741	-0.871261	-0.976475		0.408064	-162.35	-0.388855	-0.123726		1.21603	-47.3222	0.824315	-0.893997
1.01667	23.8111	0.930129	0.410451		0.494827	-165.819	-0.479748	-0.121223		2.18557	143.898	-1.76588	1.28779		3.57482	178.857	-3.5741	0.071318		0.712602	-62.9305	0.324284	-0.634541
2.84561	164.511	-2.74226	0.759943		1.65455	-175.798	-1.6501	-0.121223		2.60542	-118.535	-1.2446	-2.28893		3.70713	162.726	-3.53992	1.1008		2.144	-90.8234	-0.0308116	-2.14378
2.13933	157.252	-1.97291	0.827244		1.06496	179.526	-1.06492	0.0088162		1.84529	-112.505	-0.706317	-1.70476		1.08678	122.499	-0.583913	0.916586		1.97109	-71.7375	0.617685	-1.87181
1.06845	128.254	-0.661525	0.839023		0.755674	4.15777	0.753685	0.0547887		2.07812	-156.927	-1.91187	-0.814435		1.43231	114.307	-0.58958	1.30534		2.37842	-24.1177	2.1708	-0.971851
0.656111	72.7679	0.194368	0.62666		2.23598	-178.56	-2.23528	-0.0562033		3.12384	-69.4945	1.09427	-2.9259		2.45585	143.294	-1.9689	1.46788		1.5102	-19.5929	1.42276	-0.506422
1.59398	36.9844	1.27327	0.958936		1.31665	-75.1839	0.336688	-1.27287		2.07533	-80.7977	0.331888	-2.04862		2.21041	127.068	-1.33236	1.76373		0.61994	-125.229	-0.357607	-0.506402
1.35386	69.3485	0.477484	1.26687		1.66648	-173.417	-1.6555	-0.191057		1.59769	-136.522	-1.15935	-1.09933		3.50228	137.922	-2.59952	2.34701		0.125368	35.5145	0.102046	0.0728277
2.90051	142.691	-2.30699	1.75805		0.55851	-6.2722	0.555167	-0.0610183		1.67019	-21.1674	1.55751	-0.603097		2.53505	113.88	-1.02622	2.31805		0.81196	108.809	-0.261793	0.768598
1.95711	56.2062	1.08856	1.62645		1.31232	22.8172	1.20962	0.508906		0.0309185	41.5343	0.0231443	0.0205011		2.15536	-65.9245	0.879259	-1.96786		1.93059	27.9918	1.70474	0.906112
1.12493	-146.885	-0.942217	-0.614576		0.6618	65.7213	0.272116	0.603267		2.25662	-174.74	-2.24711	-0.20688		0.844707	-82.5129	0.110068	-0.837505		1.75704	-145.71	-1.45166	-0.989889
2.75315	-168.486	-2.69774	-0.549556		0.98055	46.0124	0.680994	0.705496		2.81357	169.591	-2.76727	0.508334		1.12993	-52.1919	0.692667	-0.89272		0.526969	-39.0479	0.409255	-0.331975
0.246901	-9.68532	0.243382	-0.0415378		0.742334	-126.732	-0.443971	-0.594936		0.910657	3.51208	0.908947	0.0557859		1.37277	-33.8317	1.14033	-0.764299		1.45173	-179.424	-1.45166	-0.0145962
3.30268	173.73	-3.28292	0.360717		0.0858117	-45.5833	0.0600572	-0.0612925		0.454872	126.747	-0.27214	0.364484		1.37955	-148.884	-1.18106	-0.71292		0.0257643	11.9207	0.0252087	0.00532183
1.00515	150.775	-0.877198	0.490756		1.10124	154.088	-0.99053	0.481224		1.02379	-50.2129	0.655163	-0.786712		0.15247	70.5644	0.050734	0.143781		0.658875	130.424	-0.427236	0.501583
1.03633	68.529	0.37933	0.964415		2.11979	10.3772	2.08512	0.381832		1.83601	-5.34669	1.82802	-0.171083		0.988297	63.9586	0.433883	0.887962		0.799156	-54.6052	0.462877	-0.651457
3.86001	150.151	-3.34794	1.92119		0.573036	78.9653	0.109681	0.562442		0.255822	108.631	-0.0817288	0.242416		1.71751	-48.4703	1.13872	-1.28575		0.428933	-96.9138	-0.0516331	-0.425814
1.98648	85.8467	0.14387	1.98126		1.17042	133.019	-0.79851	0.855728		1.00787	56.4424	0.557124	0.839886		0.514669	-75.5792	0.128174	-0.498453		4.07468	-120.153	-2.04678	-3.52331
2.78917	-92.1094	-0.102662	-2.78728		1.20605	107.085	-0.354329	1.15282		1.86621	35.3849	1.52149	1.08066		1.15292	-13.2558	1.12221	-0.264364		4.06522	-106.776	-1.17337	-3.89221
3.06267	-58.7353	1.5895	-2.61791		1.69871	39.9319	1.30259	1.09036		3.28738	34.1244	2.72136	1.84419		0.764252	79.0882	0.144671	0.750435		2.98142	-81.2579	0.45314	-2.94679
2.71487	-51.0052	1.70833	-2.11001		2.85491	24.9231	2.58905	1.20306		1.26342	-85.0084	0.109931	-1.25863		1.51483	47.53	1.02282	1.11739		2.05266	-79.9398	0.358563	-2.0211
2.53855	-65.401	1.05671	-2.30816		1.9693	-99.1696	-0.313822	-1.94413		2.56597	-173.576	-2.54986	-0.287104		1.77754	90.9221	-0.0286064	1.77731		2.25087	-70.7205	0.743183	-2.12464
2.28825	-110.942	-0.817877	-2.13709		1.33962	-70.3193	0.451156	-1.26136		2.13802	166.753	-2.08113	0.48993		2.8757	78.4016	0.578159	2.81698		1.94103	-58.0561	1.02698	-1.64709
1.99774	-122.656	-1.07795	-1.68195		1.3352	-125.603	-0.777312	-1.08561		2.18671	-149.075	-1.87586	-1.12377		3.6175	-125.458	-2.09853	-2.94661		2.33898	-147.193	-1.96592	-1.26727
1.91743	-15.2984	1.84949	-0.505907		1.09157	-110.776	-0.387195	-1.02059		1.57558	-169.818	-1.55076	-0.278516		2.99499	-117.244	-1.37106	-2.66274		0.724671	-59.516	0.367624	-0.6245
0.108283	-31.4296	0.0923961	-0.0564643		2.34204	-159.498	-2.1937	-0.820278		2.35618	-171.616	-2.331	-0.343536		3.38254	-144.353	-2.74872	-1.97132		1.42685	-157.238	-1.31572	-0.552052
2.24708	-57.3301	1.21297	-1.89158		1.15888	-147.041	-0.97237	-0.63047		0.400246	-1.6005	0.40009	-0.011179		2.28137	-121.08	-1.17774	-1.95387		1.50137	-149.26	-1.29042	-0.76742
3.37519	-18.9627	3.19202	-1.09678		0.408227	-23.5905	0.374111	-0.163371		0.531845	135.665	-0.380413	0.371679		2.74326	-137.84	-2.03351	-1.84128		1.19113	146.39	-0.992009	0.659334
1.86023	-27.7752	1.6459	-0.866871		0.454477	-174.28	-0.452214	-0.0452945		0.951367	-56.6562	0.522929	-0.794761		1.61797	-102.239	-0.343001	-1.5812		0.503226	94.7467	-0.0416421	0.501501
2.92865	-9.63754	2.88732	-0.490299		1.54275	-80.5967	0.252058	-1.52202		0.260098	119.959	-0.12989	0.225343		2.32447	-151.024	-2.03351	-1.12606		1.87433	145.815	-1.5505	1.05313
0.435232	-130.469	-0.28248	-0.331108		1.18187	-133.292	-0.810435	-0.860244		0.635509	-27.9326	0.561472	-0.297693		1.40627	-55.9624	0.787139	-1.16533		1.31436	83.1365	0.157073	1.30494
0.237752	-17.9198	0.226218	-0.073153		1.08999	-22.4219	1.00758	-0.415746		1.75632	67.6094	0.669015	1.62391		3.02556	-162.079	-2.87876	-0.931004		2.31382	103.378	-0.53537	2.25103
1.73067	-4.036	1.72638	-0.12181		0.582474	-140.465	-0.449226	-0.370772		1.9785	114.127	-0.808718	1.80566		0.736163	-59.285	0.376008	-0.632893		2.65342	114.366	-1.09471	2.41708
3.8281	-3.73705	3.81996	-0.249506		1.76883	-97.0322	-0.216553	-1.75553		2.33522	61.2689	1.12254	2.04772		2.29327	-166.358	-2.22857	-0.540887		0.506723	151.253	-0.44427	0.243707
2.25329	5.49007	2.24295	0.215579		1.43119	-54.5398	0.830287	-1.16573		1.50173	-103.34	-0.346482	-1.46121		1.26231	-173.14	-1.25327	-0.15077		0.0818744	72.8491	0.0241438	0.0782335
1.19878	27.7261	1.06114	0.557729		1.58024	-124.31	-0.890733	-1.30528		1.89383	-146.983	-1.58798	-1.03194		3.53	-178.608	-3.52896	-0.0857504		1.49843	41.9084	1.11515	1.00086
1.85339	18.4739	1.75788	0.587287		1.40869	-112.613	-0.54165	-1.30039		0.0679349	-49.8802	0.0437764	-0.0519498		0.0646635	8.20391	0.0640017	0.00922724		1.23395	72.6884	0.367186	1.17805
0.997997	72.3423	0.302723	0.950977		0.809728	-100.164	-0.142886	-0.797022		1.59892	-173.295	-1.58798	-0.186684		1.8687	149.85	-1.61588	0.938584		2.18309	-90.2178	-0.00829671	-2.18307
1.46813	56.7819	0.804283	1.22823		0.595275	-9.72533	0.58672	-0.100557		0.584234	159.622	-0.547672	0.203433		1.48688	153.151	-1.32659	0.671545		2.34138	-122.091	-1.2439	-1.98363
1.36221	88.4926	0.0358352	1.36174		2.30085	-176.76	-2.29718	-0.130039		4.15576	-85.5571	0.321926	-4.14328		0.700917	106.72	-0.20165	0.671283		2.83648	-134.655	-1.99358	-2.01773
3.21164	29.4502	2.79665	1.57906		0.80436	-175.364	-0.801728	-0.0650195		4.14522	-87.3484	0.191771	-4.14078		2.2781	157.641	-2.10683	0.866603		1.59725	-55.9793	0.893648	-1.32386
1.88157	70.9154	0.615205	1.77815		0.346592	180	-0.346592	4.24452e-17		4.39947	-42.619	3.23745	-2.97897		2.63455	132.287	-1.77264	1.949		1.00992	-71.4685	0.320977	-0.957552
2.2349	-73.6992	0.627292	-2.14506		0.753959	72.7089	0.224097	0.719885		2.91465	-93.8998	-0.19823	-2.9079		2.09599	78.2966	0.425162	2.05242		1.3139	-161.212	-1.2439	-0.42316
2.34899	-46.6488	1.61251	-1.70809		2.84358	21.7804	2.64058	1.05511		3.46877	-51.5268	2.15809	-2.7157		4.21765	144.332	-3.42647	2.45924		0.765067	-23.1722	0.703346	-0.30105
2.55716	-26.4301	2.28988	-1.13821		1.24572	110.064	-0.427363	1.17012		1.34886	-80.1359	0.231074	-1.32892		2.77097	98.4062	-0.40509	2.7412		2.16563	-102.056	-0.452341	-2.11786
1.45732	-78.5165	0.29013	-1.42814		2.6888	27.7044	2.38055	1.25005		1.04983	-130.699	-0.684573	-0.795928		4.02389	114.156	-1.64669	3.67153		0.926926	-83.2607	0.108777	-0.920522
0.282374	170.022	-0.278103	0.0489256		1.96962	45.801	1.37313	1.41207		2.18152	-177.88	-2.18002	-0.0807139		2.62218	-113.488	-1.04507	-2.40493		1.19275	-34.7164	0.980419	-0.67929
0.17987	70.648	0.0596035	0.169708		1.60141	60.6676	0.784491	1.3961		0.578091	87.2352	0.0278847	0.577418		1.61751	-130.248	-1.04507	-1.23458		2.16859	-165.674	-2.10116	-0.536582
1.20164	144.861	-0.982651	0.691613		1.53963	77.4557	0.334399	1.50287		2.3515	159.72	-2.20573	0.815034		1.84458	-50.8094	1.16559	-1.42964		3.21573	175.655	-3.20649	0.243652
1.2036	59.3116	0.614282	1.03505		2.44297	50.844	1.54257	1.89435		2.34659	-118.968	-1.13651	-2.05301		1.99866	-32.7858	1.68027	-1.08227		1.95593	167.038	-1.9061	0.438711
2.95847	-123.053	-1.61359	-2.47969		3.59477	38.4566	2.81499	2.23567		2.4408	-130.745	-1.5931	-1.8492		1.81027	-149.841	-1.56523	-0.90948		1.26912	159.777	-1.19088	0.438711
4.08274	-134.603	-2.86686	-2.90687		2.2905	89.0814	0.0367206	2.29021		3.51391	-149.32	-3.02207	-1.79294		0.587482	-77.8999	0.123148	-0.574429		0.704006	87.3436	0.0326276	0.70325
4.10636	-145.571	-3.38702	-2.3217		3.13372	49.2892	2.04394	2.37539		0.50185	-92.8665	-0.025097	-0.501222		2.23903	-171.672	-2.21542	-0.324305		2.80467	149.767	-2.42319	1.41221
1.97917	-126.214	-1.16929	-1.59683		2.62467	65.8193	1.0751	2.39437		0.782308	113.798	-0.315674	0.71579		1.81692	0.0218853	1.81692	0.000694012		1.71614	125.155	-0.988151	1.40311
3.74321	-159.982	-3.51706	-1.28138		3.58773	54.7965	2.06826	2.93157		3.35541	152.278	-2.97027	1.56086		1.2461	9.92625	1.22745	0.214803		4.11299	-62.0519	1.92764	-3.6333
1.50827	-133.925	-1.04631	-1.08633		3.02592	93.9362	-0.207714	3.01878		2.34036	130.89	-1.53202	1.76923		0.321786	52.0526	0.197879	0.253753		3.41216	-89.4604	0.0321317	-3.41201
3.59849	-167.787	-3.51706	-0.761228		2.11243	-26.1125	1.89682	-0.929757		2.91913	114.16	-1.19476	2.66343		1.11579	153.505	-0.998596	0.497783		2.66556	-90.6822	-0.0317392	-2.66537
2.57891	-170.264	-2.54176	-0.436131		2.59744	-10.5123	2.55385	-0.473895		0.242653	43.2859	0.176637	0.166372		1.54597	145.083	-1.26767	0.884901		3.4037	-38.4295	2.66636	-2.11557
2.78942	166.26	-2.7096	0.662544		1.19349	0.438545	1.19346	0.00913497		1.06318	134.056	-0.739293	0.764068		4.01882	-111.717	-1.48704	-3.73358		2.33963	-60.5149	1.15156	-2.03661
4.35956	170.304	-4.29729	0.73422		0.529762	16.8711	0.506961	0.153747		2.04485	120.987	-1.05278	1.75301		3.34243	-117.213	-1.52847	-2.97248		2.31829	-116.941	-1.05036	-2.06669
3.65903	153.219	-3.26654	1.6487		0.542309	124.737	-0.309017	0.445654		1.2563	-5.7622	1.24995	-0.126133		1.7189	-91.8874	-0.0566118	-1.71797		1.76071	-50.2951	1.1248	-1.35459
1.81821	101.749	-0.370234	1.78011		1.55855	40.3465	1.18784	1.00902		0.707528	10.7475	0.695117	0.13194		2.75358	-143.109	-2.20226	-1.65295		4.15252	-17.6511	3.95703	-1.25913
3.9744	145.883	-3.29036	2.22921		2.5606	22.6097	2.36381	0.984428		1.72322	6.88729	1.71078	0.206642		3.11949	-151.35	-2.73756	-1.49566		1.8658	-32.8744	1.56702	-1.01275
2.77807	128.519	-1.73013	2.17355		1.07188	76.4024	0.252002	1.04184		0.497915	65.7487	0.204513	0.453975		0.872759	-85.1907	0.0731721	-0.869686		0.817119	-92.1494	-0.0306468	-0.816544
0.868365	159.017	-0.81078	0.310957		2.61336	26.5181	2.33841	1.16681		1.17345	89.3677	0.0129491	1.17338		0.582386	-20.9953	0.543721	-0.208664		0.925607	-54.3825	0.539047	-0.752447
0.454618	82.9809	0.0555544	0.45121		1.85308	68.0247	0.693434	1.71844		1.96954	-137.956	-1.46265	-1.319		2.08413	-173.871	-2.07222	-0.222524		2.06349	-2.4101	2.06167	-0.0867737
1.45997	33.0287	1.22404	0.795772		2.43996	-97.9698	-0.338305	-2.41639		2.57634	-168.891	-2.52807	-0.496385		1.83363	-52.7999	1.10862	-1.46054		1.12904	27.0545	1.00549	0.51353
1.0159	116.622	-0.455235	0.908198		2.7199	-117.326	-1.24858	-2.41639		1.20107	-165.47	-1.16266	-0.301327		0.861623	-83.9515	0.0907895	-0.856826		2.72959	66.991	1.06693	2.51244
1.08114	57.748	0.576945	0.91433		1.97673	-81.2495	0.300723	-1.95372		0.513017	151.018	-0.448774	0.248571		2.92528	-8.5135	2.89304	-0.433065		1.04872	33.1438	0.878092	0.573377
2.35484	27.2164	2.09413	1.07699		2.93127	-138.591	-2.19846	-1.93885		3.18004	-128.132	-1.96359	-2.50139		0.625884	169.64	-0.61568	0.112556		1.78122	17.1043	1.70244	0.523879
1.84164	125.346	-1.0654	1.50218		2.13177	-131.423	-1.41041	-1.59849		2.79468	-138.517	-2.09363	-1.8512		0.451268	93.1747	-0.0249911	0.450575		1.19032	129.108	-0.750834	0.923645
1.96468	53.8564	1.15879	1.58656		1.44468	-54.8347	0.832046	-1.18102		1.24405	-64.5263	0.535061	-1.12311		2.53049	16.6103	2.42489	0.723365		1.2026	101.68	-0.243469	1.17769
3.40233	43.5366	2.46647	2.34359		2.48818	-153.351	-2.22387	-1.116		2.30551	-22.8028	2.12532	-0.893525		2.00727	60.2965	0.994623	1.74351		1.99956	68.3817	0.73668	1.85891
2.66552	99.4853	-0.439265	2.62908		1.6949	-144.428	-1.37862	-0.98596		1.16679	-28.0176	1.03005	-0.548093		2.43838	-106.475	-0.691516	-2.33827		0.804286	-89.6694	0.00464092	-0.804272
2.60346	81.1765	0.399346	2.57265		0.829173	-37.8408	0.654813	-0.508672		1.11296	161.157	-1.05332	0.359465		1.9483	-89.303	0.0236987	-1.94815		0.540289	-9.41563	0.53301	-0.0883885
2.98299	108.847	-0.963609	2.82306		2.2597	-169.784	-2.22387	-0.400784		0.151163	6.28404	0.150255	0.0165459		2.9576	-140.898	-2.29516	-1.86538		0.0870748	-86.2111	0.00575394	-0.0868845
0.0358201	12.4949	0.0349717	0.00774978		1.57893	-162.842	-1.50866	-0.465804		0.318753	116.219	-0.140824	0.285958		1.19359	-125.405	-0.691516	-0.972862		1.35706	13.7828	1.31799	0.323309
1.60166	168.423	-1.56908	0.32143		2.75735	-174.365	-2.74403	-0.270745		0.626153	3.73801	0.624821	0.0408216		2.09459	-161.986	-1.99191	-0.647764		0.598128	50.0708	0.383903	0.458667
0.908457	141.803	-0.713951	0.561754		1.31578	-176.702	-1.3136	-0.0756868		1.52101	3.7782	1.51771	0.100226		3.0761	-170.311	-3.03222	-0.517725		1.21042	141.968	-0.9534	0.745746
1.14828	31.1618	0.982597	0.594187		1.97957	172.762	-1.96379	0.249411		0.756832	29.5863	0.658151	0.373673		1.29114	-171.42	-1.27669	-0.192628		1.69915	65.4575	0.705771	1.54563
2.04418	152.995	-1.82129	0.928203		0.399351	40.6501	0.302989	0.260152		0.512665	87.9311	0.0185079	0.512331		3.2923	179.958	-3.2923	0.00243064		3.08383	48.3249	2.05046	2.3034
0.688305	91.6071	-0.0193043	0.688034		1.3673	163.888	-1.3136	0.37945		2.09191	34.8693	1.71632	1.19596		3.65907	160.458	-3.4483	1.22394		2.52791	83.1985	0.299382	2.51012
2.97333	158.165	-2.76002	1.10588		0.480232	70.6897	0.158805	0.453215		2.03639	45.5186	1.42685	1.45292		1.18548	127.732	-0.725475	0.937582		3.11466	-84.722	0.286512	-3.10145
1.30852	120.65	-0.667073	1.12571		0.877589	139.107	-0.663402	0.574508		1.84958	27.9859	1.6333	0.867923		0.983489	88.7744	0.0210353	0.983264		3.256	-51.7274	2.01678	-2.5562
3.38392	156.558	-3.10461	1.34622		0.692044	132.591	-0.468344	0.509489		0.881962	49.0693	0.577813	0.666325		1.64841	129.7	-1.05296	1.26828		2.12036	-68.0948	0.79105	-1.96728
1.87793	113.964	-0.762747	1.71605		0.50966	91.3169	-0.0117132	0.509525		1.41796	99.3057	-0.229289	1.3993		1.7059	-140.912	-1.32408	-1.07559		2.43202	-138.931	-1.83355	-1.59774
1.91477	57.4012	1.03159	1.61312		2.0461	161.962	-1.94554	0.633583		1.13531	-35.7203	0.921734	-0.662829		0.668754	-173.127	-0.663949	-0.080024		0.76737	-58.0205	0.406411	-0.650912
2.73373	132.535	-1.84812	2.01438		1.37739	146.967	-1.15475	0.750834		0.368083	24.4587	0.335052	0.1524		0.384776	-1.50414	0.384644	-0.0101001		1.76656	-19.7105	1.66305	-0.595802
2.60166	112.35	-0.9893	2.40623		2.83394	157.277	-2.61399	1.09466		1.06113	19.5324	1.00006	0.354778		0.593391	57.7744	0.316428	0.501982		0.459714	104.303	-0.113571	0.445465
3.2446	63.8884	1.42801	2.91345		2.49259	139.62	-1.89877	1.61482		2.86497	-163.737	-2.75033	-0.802341		2.52973	-51.7885	1.56481	-1.98769		0.593472	178.945	-0.593371	0.0109276
3.43343	-96.6152	-0.395535	-3.41057		1.12677	-91.4035	-0.0275979	-1.12643		0.770325	-131.626	-0.5117	-0.575816		1.36599	-130.183	-0.881376	-1.0436		2.53149	5.68441	2.51904	0.250742
2.87676	-64.8674	1.2218	-2.60441		0.993251	-88.0194	0.0343271	-0.992658		1.34972	-167.932	-1.3199	-0.282185		1.86573	-152.948	-1.66161	-0.848537		0.807317	113.383	-0.320403	0.741014
2.47263	-116.373	-1.09839	-2.21528		0.825631	-126.046	-0.485829	-0.667561		0.9116	178.307	-0.911202	0.0269367		2.07071	-12.1338	2.02445	-0.435253		3.05756	-105.82	-0.83352	-2.94176
2.02392	-54.4328	1.17722	-1.64632		0.150566	-70.2986	0.0507584	-0.141752		0.779771	9.15204	0.769844	0.124026		2.15299	-169.472	-2.11675	-0.393401		3.55615	-143.418	-2.8556	-2.11937
1.47368	-95.0759	-0.130386	-1.4679		0.888262	-170.448	-0.875946	-0.147404		1.56742	12.9091	1.5278	0.35017		0.621066	-39.8595	0.476742	-0.398045		1.22936	-107.657	-0.372876	-1.17144
1.22663	-73.084	0.356912	-1.17356		0.199278	46.617	0.136878	0.144831		1.12735	50.2559	0.720782	0.866829		1.07644	-179.825	-1.07643	-0.00328381		3.20144	-173.474	-3.1807	-0.363847
2.2124	-34.3611	1.82633	-1.24869		0.565815	8.54888	0.559529	0.0841102		1.98185	86.962	0.105036	1.97907		1.1941	154.351	-1.07643	0.516872		1.40798	-165.024	-1.36016	-0.363847
1.79061	-143.31	-1.43585	-1.06987		1.08923	9.38898	1.07464	0.177693		0.580402	-173.491	-0.576661	-0.0657935		2.03296	80.6174	0.331425	2.00577		1.83029	-172.661	-1.81529	-0.233808
1.36586	-36.9048	1.09219	-0.820179		1.10212	29.0425	0.963543	0.535036		1.24198	-13.343	1.20846	-0.286625		0.593627	-178.564	-0.593441	-0.0148773		0.322182	-173.092	-0.319843	-0.038749
1.0851	-164.519	-1.04573	-0.289632		0.751917	-30.8665	0.645419	-0.385764		0.0867272	-130.657	-0.056505	-0.0657935		0.256757	25.2608	0.232204	0.109568		0.690048	93.4149	-0.0411035	0.688823
0.256244	-141.478	-0.200477	-0.159593		0.788286	-154.595	-0.712054	-0.338192		0.463652	21.4873	0.431427	0.169833		0.687792	132.817	-0.467466	0.504512		1.51742	177.381	-1.51584	0.0693405
1.50116	176.17	-1.4978	0.10028		0.992689	-156.035	-0.907112	-0.403211		1.964	15.6281	1.89139	0.529085		1.86772	121.411	-0.973413	1.594		0.550505	32.5028	0.464277	0.295809
0.0665264	7.9283	0.0658905	0.00917624		0.281552	-52.1038	0.172938	-0.22218		1.94456	49.5829	1.26075	1.48048		2.69652	45.7961	1.88005	1.93304		2.01059	44.271	1.43968	1.4035
0.970324	1.74377	0.969875	0.0295269		0.584728	-152.149	-0.516995	-0.273172		1.57292	83.1303	0.18814	1.56163		2.32032	111.241	-0.84065	2.16268		1.02275	-5.04001	1.0188	-0.0898501
0.778882	153.419	-0.696558	0.348517		0.657518	169.755	-0.647034	0.116945		1.66887	67.1041	0.649286	1.53738		2.92814	113.604	-1.17248	2.68315		0.359986	-21.8792	0.334057	-0.134149
0.941511	28.2308	0.829518	0.445358		0.356381	136.129	-0.256917	0.246984		0.624031	134.807	-0.439765	0.442742		2.7412	-35.3302	2.23636	-1.5852		0.589677	110.963	-0.210963	0.550648
1.08734	-131.824	-0.725092	-0.810282		0.83442	67.7688	0.315699	0.772393		1.23409	142.599	-0.98037	0.749569		1.44702	-65.1252	0.608668	-1.31277		0.539848	39.7118	0.415287	0.344923
1.85194	-165.816	-1.79549	-0.453782		1.8544	32.8178	1.55844	1.00503		2.76156	158.294	-2.56574	1.02135		1.66918	-4.62749	1.66374	-0.134665		1.05757	83.6302	0.117332	1.05104
1.99165	172.518	-1.97469	0.259351		1.2503	74.4919	0.334299	1.20478		2.8181	-47.2174	1.9141	-2.0683		0.786795	-1.72229	0.78644	-0.0236473		2.55296	54.7288	1.4742	2.08431
0.200437	60.6517	0.0982377	0.174712		1.50369	179.796	-1.50368	0.00534971		3.2494	-37.6576	2.57248	-1.98519		1.30063	3.50407	1.2982	0.0794936		3.16571	54.1586	1.85366	2.56625
1.39635	156.366	-1.27923	0.559784		0.619375	64.0748	0.270789	0.557044		1.64508	-90.5823	-0.0167193	-1.64499		0.696545	127.575	-0.424751	0.552052		3.25378	62.0815	1.52347	2.87508
0.822715	142.924	-0.65639	0.495996		0.984516	116.842	-0.444548	0.878436		2.21343	-13.8422	2.14915	-0.52956		2.44663	14.5223	2.36846	0.613509		1.36847	108.435	-0.432748	1.29824
1.84186	141.45	-1.44045	1.14785		2.34055	149.847	-2.02383	1.1757		2.78064	-9.473	2.74272	-0.457646		2.07375	24.597	1.88557	0.863163		2.3435	62.4712	1.08315	2.07817
1.40238	-81.5654	0.205701	-1.38721		1.49369	111.574	-0.549222	1.38905		1.48114	-0.667679	1.48104	-0.0172597		2.59792	48.4706	1.72243	1.94484		2.72833	113.943	-1.10722	2.49356
1.20197	-131.264	-0.79274	-0.903497		1.50372	62.8309	0.686627	1.33781		1.28173	-47.5312	0.865411	-0.945464		3.26331	51.0056	2.05342	2.53627		2.38158	71.2638	0.764992	2.25538
1.45203	1.26067	1.45168	0.0319464		1.50715	86.0429	0.104009	1.50356		1.63179	-25.5996	1.4716	-0.705063		3.24176	-67.1957	1.25645	-2.98836		4.13103	117.888	-1.9323	3.65125
0.348306	25.8947	0.313335	0.152111		2.40722	125.786	-1.40765	1.95275		0.733354	5.67192	0.729764	0.0724789		3.38469	-45.3148	2.38015	-2.40645		4.33419	108.435	-1.37059	4.11178
0.549853	135.497	-0.392163	0.385418		2.03869	95.3989	-0.19182	2.02964		0.450698	-8.66739	0.445551	-0.0679193		2.26603	-73.1457	0.65701	-2.16869		0.532757	4.73344	0.53094	0.0439632
1.57555	18.6683	1.49266	0.504315		2.89691	121.269	-1.50368	2.47609		0.877628	162.29	-0.836035	0.266977		3.78727	-25.4702	3.41919	-1.62869		2.52419	175.444	-2.51622	0.200513
1.22999	97.7802	-0.166507	1.21867		3.05198	109.683	-1.02795	2.87366		1.54038	167.35	-1.50299	0.337348		2.94342	-24.6505	2.67518	-1.22765		1.7103	164.633	-1.64915	0.453234
2.32945	-132.589	-1.57642	-1.715		2.29254	-131.577	-1.5214	-1.71497		1.10387	102.107	-0.231516	1.07932		4.41726	-17.508	4.21263	-1.32888		1.76214	143.574	-1.41786	1.04632
3.11019	-154.756	-2.81318	-1.3264		1.75546	-119.845	-0.873626	-1.52264		2.26725	133.889	-1.5718	1.63397		1.13065	-75.653	0.280168	-1.09539		1.38869	119.238	-0.678296	1.21176
3.89153	-163.099	-3.72345	-1.13134		0.707494	-138.674	-0.531307	-0.467184		2.17055	55.7892	1.22037	1.79499		0.595147	-70.1875	0.201721	-0.559918		1.53204	59.4969	0.777641	1.32001
1.80238	-151.093	-1.57781	-0.871261		2.17419	-179.283	-2.17402	-0.02719		2.47658	69.5272	0.866215	2.32015		1.09836	-27.1036	0.977746	-0.500416		2.16886	79.9912	0.376945	2.13585
2.61086	-167.925	-2.5531	-0.546164		2.32323	167.923	-2.27182	0.486069		0.0256632	58.8932	0.0132585	0.021973		2.16302	-37.0457	1.72643	-1.30312		2.53651	109.452	-0.844714	2.39173
3.09325	-173.482	-3.07326	-0.351105		1.73141	152.757	-1.53935	0.792583		1.1381	9.23535	1.12335	0.182655		1.75399	-52.7013	1.06287	-1.39528		0.753405	5.09785	0.750425	0.0669453
1.0529	-160.521	-0.992631	-0.351105		2.51398	149.645	-2.16934	1.27046		0.915317	136.625	-0.665323	0.628611		1.63267	-23.3706	1.49873	-0.647643		0.366505	98.5349	-0.0543939	0.362446
3.33762	177.097	-3.33333	0.169051		0.49336	-173.497	-0.490186	-0.0558761		2.11798	29.3502	1.84612	1.03812		1.03821	-165.337	-1.00439	-0.262806		1.58447	-67.2869	0.61179	-1.4616
1.18963	136.476	-0.862592	0.819246		0.888566	-172.18	-0.880303	-0.120896		1.78014	127.09	-1.07354	1.42		0.29601	-0.366884	0.296004	-0.00189544		1.03703	-101.218	-0.201743	-1.01722
2.76076	137.468	-2.03441	1.86628		0.16027	7.6778	0.158833	0.0214124		2.47801	101.865	-0.50949	2.42506		2.3126	-1.58936	2.31171	-0.0641423		0.914833	-40.3249	0.697457	-0.592007
2.06825	-94.3616	-0.157291	-2.06226		0.491079	69.2617	0.173891	0.459261		3.15609	57.6401	1.68925	2.66596		3.52019	8.01005	3.48585	0.490527		1.23293	-162.681	-1.17704	-0.367026
2.16265	-78.7093	0.42342	-2.1208		2.00311	108.698	-0.642144	1.89739		1.58701	-98.1531	-0.225068	-1.57097		0.730043	99.9457	-0.12609	0.719071		0.384127	5.19767	0.382548	0.0347989
2.58351	-131.807	-1.72222	-1.92574		2.1749	92.3108	-0.087691	2.17314		2.42745	-139.671	-1.85056	-1.57097		2.67726	28.4343	2.35429	1.27478		2.35238	174.691	-2.34228	0.217675
2.12627	-57.1022	1.15487	-1.7853		1.8197	-8.26189	1.80081	-0.261487		0.880327	-11.4543	0.862794	-0.174821		3.20806	20.4395	3.00609	1.12031		3.30686	-69.0418	1.18282	-3.08808
2.15861	-145.89	-1.78724	-1.21053		0.837571	126.314	-0.496017	0.674902		0.663882	144.142	-0.538057	0.388888		1.85781	131.53	-1.23176	1.39077		3.90756	-36.1176	3.15656	-2.30329
1.45535	-145.687	-1.20207	-0.820409		2.05726	27.862	1.81877	0.961448		1.55537	4.52096	1.55053	0.1226		2.02532	92.5149	-0.0888685	2.02337		1.12705	-29.6631	0.979348	-0.557774
1.11735	-31.229	0.955448	-0.579301		1.37646	56.9411	0.750863	1.15363		0.813851	69.2446	0.288412	0.761033		2.39799	62.7087	1.09952	2.13106		2.65922	-14.4182	2.57547	-0.662139
2.58497	-173.33	-2.56748	-0.300253		2.52148	27.7142	2.23221	1.17264		1.96297	55.3357	1.11647	1.61454		3.43906	37.8546	2.71539	2.11041		1.368	-25.831	1.23131	-0.596059
0.235909	-5.59605	0.234785	-0.0230045		3.32268	21.7558	3.08601	1.23156		1.74372	96.745	-0.204802	1.73165		3.62201	-66.7831	1.42784	-3.3287		0.37139	70.6492	0.12306	0.350409
1.46394	0.673363	1.46384	0.0172044		1.77065	129.098	-1.11667	1.37414		1.35972	-14.1511	1.31846	-0.332424		3.10855	-102.517	-0.673712	-3.03466		3.2299	37.5458	2.56088	1.96829
1.18968	159.951	-1.11758	0.407858		1.57661	80.1432	0.269895	1.55334		0.455717	-32.2723	0.385318	-0.243328		2.74921	-72.8375	0.811243	-2.62679		2.84354	59.9141	1.42546	2.46045
1.84406	118.774	-0.887636	1.61637		2.88281	37.7784	2.27854	1.76604		0.2488	166.715	-0.242142	0.0571723		2.64705	-104.954	-0.68304	-2.5574		3.55978	46.9718	2.42904	2.60226
2.01509	-18.9967	1.90535	-0.655939		3.05867	51.0417	1.92315	2.37843		0.0740641	36.3268	0.0596698	0.0438749		1.90948	-75.2503	0.486146	-1.84655		3.52107	-82.2989	0.471843	-3.48931
0.761149	-30.7224	0.654324	-0.388855		0.504545	-26.0659	0.453228	-0.221699		1.28826	168.873	-1.26405	0.24861		1.05179	-38.219	0.82634	-0.65071		2.78441	-92.3103	-0.112244	-2.78215
0.344306	-1.07082	0.344246	-0.0064345		1.09931	-21.7266	1.02122	-0.40694		0.791331	37.3102	0.629397	0.479649		2.8396	-22.0563	2.63179	-1.06632		2.76316	-56.2253	1.53612	-2.29683
1.31954	-0.316548	1.31952	-0.00729014		1.14422	-169.329	-1.12443	-0.211882		1.04755	86.1338	0.0706321	1.04516		2.58438	-47.9009	1.73261	-1.91758		2.28784	-79.7776	0.406023	-2.25152
3.01251	3.41555	3.00716	0.179477		0.114815	45.3677	0.0806637	0.0817059		2.38708	-123.598	-1.32094	-1.98829		2.86027	-37.7887	2.26041	-1.75263		2.2158	-123.042	-1.20818	-1.85744
0.422761	48.0128	0.282812	0.314236		0.761323	11.3099	0.746539	0.149308		2.34229	-132.453	-1.58101	-1.72821		1.71033	-73.3067	0.491289	-1.63825		1.71766	-97.13	-0.213197	-1.70437
2.59378	14.6996	2.50888	0.658174		1.00154	154.75	-0.905848	0.42722		1.09134	-110.854	-0.388502	-1.01985		2.30436	-42.5899	1.69651	-1.55947		1.76208	-32.5795	1.48481	-0.948828
3.17061	15.4308	3.05632	0.843615		1.66643	26.3483	1.49331	0.739606		1.81006	-155.42	-1.64603	-0.752921		1.75062	-44.86	1.2409	-1.23485		0.577032	-139.281	-0.437342	-0.376429
0.991064	75.7291	0.244303	0.960481		0.829702	75.887	0.20231	0.804659		1.79738	-110.088	-0.617335	-1.68803		3.05807	-25.4509	2.7613	-1.31417		1.52485	-165.708	-1.47765	-0.376429
1.99731	29.9551	1.7305	0.997296		1.63223	42.1482	1.21015	1.09531		1.71762	-51.7252	1.06395	-1.34841		1.91913	-8.31824	1.89894	-0.277643		0.766491	174.106	-0.762439	0.0787078
1.55646	103.437	-0.361683	1.51385		1.70663	53.6981	1.01039	1.37539		1.29236	-72.2225	0.394585	-1.23065		0.84942	171.126	-0.839252	0.131039		2.66371	93.9232	-0.182251	2.65747
2.30698	44.5298	1.64461	1.61784		2.25451	127.8	-1.38179	1.78142		0.25559	14.1434	0.247842	0.0624535		2.8625	8.47309	2.83126	0.421775		3.377	115.033	-1.42896	3.05977
3.82309	26.3491	3.42589	1.69684		2.2657	82.7006	0.287868	2.24734		0.525988	128.874	-0.330119	0.409494		1.4677	134.807	-1.03431	1.04131		3.03443	80.9574	0.476917	2.99672
2.92451	37.9663	2.3056	1.79915		2.87332	96.4615	-0.323353	2.85507		1.35341	127.149	-0.817315	1.07876		2.88455	19.5535	2.71819	0.965418		3.535	111.721	-1.30826	3.28401
2.05475	102.251	-0.436013	2.00796		3.06217	69.9361	1.05054	2.87633		2.95299	-126.742	-1.76652	-2.36634		1.4041	123.464	-0.774232	1.17135		2.48653	-43.4149	1.8062	-1.70893
2.33457	83.6979	0.256269	2.32046		3.26068	-60.2197	1.6195	-2.83006		2.14566	-105.804	-0.584358	-2.06455		2.60618	36.8083	2.08663	1.56147		1.57759	-12.8696	1.53796	-0.351382
3.83925	42.809	2.81656	2.60899		3.08267	-64.267	1.33843	-2.77695		1.71618	-90.3669	-0.0109892	-1.71615		1.8879	84.1179	0.193475	1.87796		0.0370772	7.71833	0.0367413	0.00497959
2.0999	-87.853	0.0786692	-2.09843		2.38714	-89.087	0.0380351	-2.38683		1.74363	-119.376	-0.855314	-1.51944		2.00533	70.4299	0.671703	1.88948		0.606133	59.5569	0.307117	0.522567
2.16416	-137.946	-1.60691	-1.44963		3.29903	-48.8426	2.17119	-2.48386		1.39614	-69.8958	0.479891	-1.31107		2.15391	-154.059	-1.9369	-0.942212		2.1973	27.0116	1.95761	0.99795
1.79359	-135.615	-1.28181	-1.25457		3.24726	-39.4137	2.50878	-2.06174		2.95912	-149.152	-2.54048	-1.51734		0.990957	-146.419	-0.82557	-0.548115		0.698259	70.0646	0.238079	0.656417
1.21946	-57.7395	0.650909	-1.03121		1.97423	-114.134	-0.807218	-1.80166		2.23259	-174.327	-2.22165	-0.2207		0.768804	36.4832	0.618143	0.457121		1.29693	-28.8916	1.13551	-0.626618
2.4637	-152.842	-2.19209	-1.12453		1.80206	-86.7263	0.102909	-1.79912		0.270082	24.7228	0.245326	0.112956		2.59971	140.359	-2.00192	1.65857		1.8663	-19.1552	1.76296	-0.612384
0.736534	-132.922	-0.501579	-0.539352		2.49676	-44.109	1.79272	-1.73781		0.553003	1.47877	0.552819	0.0142711		2.30623	-62.6379	1.05997	-2.04821		0.230624	-15.7756	0.221937	-0.0626998
0.621923	-11.4958	0.609447	-0.123947		1.72558	-75.6337	0.428152	-1.67162		1.65811	2.70002	1.65627	0.0781081		2.3325	-136.13	-1.68153	-1.61647		2.10887	15.8872	2.02832	0.577291
0.283891	-148.286	-0.241501	-0.149235		1.48015	-73.8296	0.412214	-1.42159		0.875866	62.3189	0.406883	0.775621		1.4752	-97.7304	-0.198432	-1.4618		2.19787	46.1378	1.52296	1.58468
2.71794	174.925	-2.70728	0.240441		1.60434	-119.764	-0.796441	-1.39269		2.27684	22.5092	2.10338	0.871647		1.36401	-119.391	-0.669418	-1.18844		2.75497	93.9751	-0.190981	2.74834
0.460095	34.5476	0.37896	0.260916		1.16399	-51.7765	0.720198	-0.914438		1.74397	44.7402	1.23875	1.22757		1.59226	-138.339	-1.18957	-1.0584		0.550664	-69.3185	0.19448	-0.515178
1.12291	31.7693	0.954668	0.591211		2.73392	-18.2588	2.59627	-0.856562		1.44777	66.9227	0.567488	1.33192		0.962306	3.10049	0.960898	0.0520486		0.464493	-118	-0.218065	-0.410123
0.736725	103.056	-0.166427	0.717681		3.17634	-16.9374	3.03856	-0.925352		0.434358	142.091	-0.342702	0.266875		0.465006	115.238	-0.198271	0.420618		1.76256	70.7951	0.579789	1.66447
2.67025	160.506	-2.51718	0.891077		2.00847	-14.5381	1.94417	-0.504174		2.30589	158.767	-2.14935	0.835114		1.95101	163.031	-1.86607	0.569406		2.12833	77.9086	0.445825	2.08111
1.2348	73.8489	0.343484	1.18606		1.66416	-1.47332	1.66361	-0.0427881		1.49409	80.6272	0.243323	1.47414		1.7023	25.7209	1.53364	0.738779		1.73621	-15.6044	1.67221	-0.467029
2.68413	149.898	-2.32213	1.34621		2.49224	-86.0697	0.170827	-2.48638		3.39188	141.287	-2.64665	2.12133		1.34011	113.103	-0.525841	1.23263		0.132358	-14.0726	0.128386	-0.0321829
2.3185	132.783	-1.57478	1.70162		3.05839	-134.95	-2.16072	-2.16449		1.44838	-174.009	-1.44047	-0.151184		1.5302	59.581	0.774768	1.31956		0.59069	48.2971	0.392967	0.441012
2.67431	-169.1	-2.62607	-0.505707		2.74642	-130.143	-1.7706	-2.09947		0.740848	-168.225	-0.725258	-0.151184		2.65928	39.5478	2.05055	1.69322		2.28105	23.5414	2.0912	0.911078
2.20319	-170.182	-2.17093	-0.375668		2.27732	-133.776	-1.57555	-1.64433		2.87124	177.828	-2.86917	0.108829		2.26905	114.791	-0.951419	2.05995		3.01183	-122.066	-1.59895	-2.55235
2.89658	-175.135	-2.88614	-0.245629		1.79201	-143.769	-1.44551	-1.05916		2.02857	171.466	-2.00611	0.301022		2.10877	75.8518	0.515447	2.0448		3.19802	-147.738	-2.70428	-1.70709
3.79725	177.82	-3.7945	0.144415		0.799223	-91.0809	-0.015077	-0.79908		1.09579	136.153	-0.790278	0.75909		2.81194	-122.48	-1.51002	-2.37209		0.277935	-35.89	0.225167	-0.162934
3.18107	168.072	-3.11238	0.657495		2.12374	-170.68	-2.0957	-0.343944		1.3732	130.326	-0.888656	1.04689		1.9302	-105.586	-0.518624	-1.85922		2.74862	-155.91	-2.50922	-1.12192
1.69062	147.575	-1.42704	0.906506		0.024135	-24.984	0.0218765	-0.0101938		3.62214	161.607	-3.43711	1.1429		4.26507	-164.543	-4.1108	-1.13672		3.03292	-177.229	-3.02938	-0.146626
3.87761	163.296	-3.71398	1.11455		1.98719	-96.4972	-0.224859	-1.97443		2.17012	107.363	-0.647614	2.07123		3.05136	-154.122	-2.74539	-1.33178		1.82008	156.17	-1.66492	0.73535
1.37941	121.493	-0.7206	1.17623		1.86963	-61.2823	0.898346	-1.63966		2.93084	116.359	-1.30125	2.62613		3.2313	-161.848	-3.07049	-1.00668		2.98446	-57.9094	1.58553	-2.52846
1.66669	105.737	-0.452037	1.60422		2.50831	-125.602	-1.46023	-2.03945		4.62545	140.267	-3.55712	2.95663		0.557258	-98.2116	-0.0795928	-0.551545		2.27337	-118.928	-1.09965	-1.98972
2.01057	119.285	-0.983485	1.7536		2.14628	-119.1	-1.04381	-1.87536		3.56734	117.767	-1.66197	3.15655		3.01399	-175.691	-3.00547	-0.226447		0.497824	-51.3134	0.311169	-0.38859
4.56599	154.509	-4.12151	1.96503		1.77938	-117.08	-0.810035	-1.58431		2.372	-47.1167	1.61417	-1.73806		1.78453	-172.71	-1.7701	-0.226447		1.36517	-35.4742	1.11176	-0.792259
3.812	149.046	-3.26908	1.96073		2.07869	-127.491	-1.26517	-1.64933		1.72229	-80.9122	0.272031	-1.70067		0.0594144	-15.208	0.0573337	-0.0155859		1.11513	152.177	-0.986211	0.520484
3.80065	142.607	-3.01958	2.30805		1.83649	-139.439	-1.39521	-1.19419		1.67389	-100.732	-0.311711	-1.64461		0.441845	9.80879	0.435386	0.075273		3.55613	-62.3643	1.64951	-3.15043
2.6386	97.1069	-0.326449	2.61832		1.64761	-133.548	-1.13513	-1.19419		1.0389	-49.5057	0.674633	-0.790052		0.780161	61.5723	0.371395	0.686088		3.98211	-50.5499	2.53026	-3.0749
3.41645	104.121	-0.833493	3.31322		1.10293	-105.238	-0.289879	-1.06415		1.01026	-24.4928	0.91935	-0.418832		1.64467	100.75	-0.30676	1.6158		3.20998	-46.5023	2.20952	-2.32853
5.24033	138.027	-3.89598	3.50462		0.636985	-108.449	-0.201578	-0.604248		2.05663	-71.7413	0.64436	-1.95309		0.151892	-86.1689	0.0101486	-0.151552		1.60481	-93.4185	-0.0956917	-1.60195
4.90225	133.492	-3.37398	3.55645		2.29848	-124.373	-1.29766	-1.89712		1.57094	-37.4887	1.2465	-0.956079		0.703208	156.009	-0.642459	0.285916		3.09907	-33.397	2.58734	-1.70585
4.50608	112.028	-1.69007	4.17713		2.4063	-120.065	-1.20551	-2.08255		1.05472	-150.294	-0.916108	-0.522657		2.10902	20.5115	1.97531	0.73899		1.69439	-39.7597	1.30254	-1.08368
0.931573	-12.9566	0.907856	-0.208871		1.6359	-49.1426	1.07017	-1.2373		1.84404	-6.79152	1.8311	-0.218071		1.7579	152.687	-1.56192	0.806615		0.930992	-44.7796	0.660839	-0.655773
0.117147	-33.6901	0.0974721	-0.0649814		0.852477	-79.3115	0.158108	-0.837686		0.231024	-10.5831	0.227095	-0.0424301		0.711745	98.6054	-0.106497	0.703732		2.90861	-32.6667	2.44854	-1.56992
2.07206	6.97644	2.05672	0.251674		1.89465	-155.618	-1.72567	-0.782161		2.47281	-2.85255	2.46975	-0.123062		2.37006	38.2894	1.86024	1.46857		2.08428	-30.8319	1.78971	-1.06824
0.573833	33.511	0.47845	0.316811		1.49471	-159.556	-1.40057	-0.522083		0.977811	3.07306	0.976405	0.0524197		2.69392	130.269	-1.74128	2.05552		1.4049	-33.5936	1.17026	-0.777329
0.921131	158.746	-0.858478	0.333914		0.587861	-87.0884	0.0298608	-0.587102		0.410213	35.6782	0.333218	0.239249		2.36235	120.572	-1.20155	2.03396		2.99716	-5.77465	2.98195	-0.301563
1.91259	17.8474	1.82055	0.586176		1.02357	-149.332	-0.880412	-0.522083		2.39156	12.6554	2.33346	0.52396		2.42031	64.3196	1.04884	2.18125		2.02468	3.5673	2.02076	0.125978
1.47204	48.3522	0.978244	1.09997		0.44528	-162.761	-0.425276	-0.131966		0.647721	73.2124	0.187078	0.620116		2.86973	115.903	-1.25366	2.58142		3.64999	-1.2662	3.6491	-0.080656
2.791	31.6985	2.37465	1.46653		0.490299	172.667	-0.486289	0.0625775		1.08321	114.246	-0.444834	0.987657		3.57016	69.5198	1.24914	3.3445		1.67262	-74.1573	0.456622	-1.60909
2.72018	112.21	-1.02821	2.51836		1.72682	173.614	-1.7161	0.192062		1.8605	-101.735	-0.378392	-1.82161		4.38966	96.4564	-0.493603	4.36182		1.81756	-135.318	-1.29233	-1.27805
2.67512	82.5178	0.348349	2.65234		0.16263	128.024	-0.100178	0.128113		1.56342	-83.0306	0.189705	-1.55187		4.54197	90.61	-0.0483536	4.54172		1.69101	-42.6984	1.24278	-1.14674
2.91882	100.301	-0.521945	2.87178		0.5296	124.806	-0.302294	0.43485		1.11183	-48.7256	0.733438	-0.835609		3.75511	-135.618	-2.68377	-2.62645		0.55253	-42.6799	0.406194	-0.374561
3.89531	52.1079	2.39241	3.07406		0.939536	43.9403	0.676526	0.651952		1.25882	-27.5746	1.11583	-0.582712		0.997167	-129.662	-0.636445	-0.767645		0.618146	162.639	-0.589985	0.184451
3.60465	81.2475	0.54851	3.56267		1.18432	142.967	-0.945432	0.713288		1.81003	-13.9813	1.75641	-0.437313		0.416171	-76.8789	0.0944751	-0.405305		0.195099	104.966	-0.0503834	0.188481
2.6948	-104.996	-0.697278	-2.60302		1.6023	150.939	-1.40057	0.778308		0.141768	7.80019	0.140456	0.0192406		0.864116	177.39	-0.863219	0.0393539		1.02773	141.167	-0.80058	0.644445
2.23344	-113.191	-0.879527	-2.05297		1.36678	83.6132	0.152041	1.3583		0.95558	-52.5884	0.58055	-0.75901		0.481715	-169.149	-0.473102	-0.0906851		1.45871	12.1225	1.42619	0.306333
1.53647	-70.9997	0.500234	-1.45276		1.72019	-120.663	-0.877285	-1.47967		0.461882	-62.8038	0.211098	-0.41082		2.69398	173.634	-2.67737	0.298718		1.99235	21.4624	1.8542	0.728983
0.897094	-48.142	0.598619	-0.668156		1.5757	-49.8547	1.0159	-1.20449		1.86267	10.7203	1.83016	0.346484		3.39094	-84.9252	0.299949	-3.37765		2.06969	-133.215	-1.4172	-1.50836
0.762049	-2.2026	0.761486	-0.0292879		1.33333	-105.536	-0.357129	-1.28461		0.236436	49.2698	0.154274	0.179169		3.22577	-76.0198	0.779305	-3.13022		0.921399	-119.795	-0.45784	-0.799599
4.09934	-86.3623	0.260092	-4.09108		1.77012	-149.647	-1.52748	-0.894496		1.40979	-41.5359	1.05528	-0.934815		3.47559	-58.4148	1.8204	-2.96072		0.621356	160.483	-0.585656	0.207582
3.9932	-111.926	-1.49108	-3.70437		1.25716	-130.249	-0.812266	-0.959516		0.575982	-127.394	-0.349788	-0.457606		2.03436	-87.0959	0.10307	-2.03174		3.19998	156.926	-2.94398	1.25414
4.15919	-126.837	-2.49359	-3.3288		1.29995	-39.4429	1.00389	-0.825869		1.5403	-11.1247	1.51136	-0.297194		3.03395	-116.503	-1.35388	-2.71512		0.191624	34.2069	0.158475	0.107728
3.26502	-94.412	-0.25117	-3.25535		0.65503	-60.5583	0.321972	-0.570437		0.434413	132.061	-0.291023	0.322522		2.75198	-124.346	-1.55264	-2.27216		1.69948	147.253	-1.42937	0.919312
3.30228	-78.828	0.639836	-3.2397		1.25931	-162.707	-1.20238	-0.37434		0.969915	19.734	0.912952	0.327495		2.45179	-59.6572	1.23858	-2.11594		2.41041	143.702	-1.94266	1.42693
2.60826	-108.808	-0.84089	-2.469		0.426107	-46.2714	0.294544	-0.307914		3.25094	-149.069	-2.78861	-1.671		2.12385	-137.322	-1.5614	-1.43972		0.331138	-125.483	-0.192213	-0.269642
4.15878	-141.321	-3.24661	-2.59903		1.07553	-17.2801	1.02698	-0.319479		2.45444	-144.911	-2.00838	-1.41092		2.91429	-23.3701	2.67521	-1.15601		0.0674002	16.8278	0.0645141	0.0195121
2.36205	-81.9822	0.329461	-2.33896		0.691729	-170.492	-0.682227	-0.114262		3.03682	-169.265	-2.98367	-0.56567		0.919562	-86.0131	0.0639356	-0.917337		1.14273	40.7837	0.86525	0.746435
2.58885	-60.8457	1.26119	-2.26087		0.327338	17.1506	0.312782	0.0965268		0.642536	-101.019	-0.122815	-0.630689		1.84007	-156.813	-1.69144	-0.724503		0.0978268	3.67516	0.0976256	0.00627066
3.07643	-134.109	-2.14128	-2.20892		0.973139	143.504	-0.782307	0.578788		0.653769	-135.694	-0.467852	-0.456649		2.27408	-166.537	-2.21159	-0.529445		0.745066	5.26138	0.741927	0.0683221
2.62295	-42.0983	1.94622	-1.75844		0.931222	80.0156	0.161455	0.917118		0.349416	46.0394	0.242552	0.251516		1.19737	-25.7138	1.0788	-0.519513		1.96416	27.1006	1.74851	0.894782
3.73102	-148.511	-3.18159	-1.94884		0.991587	91.6366	-0.0283195	0.991182		1.35846	143.935	-1.09811	0.79974		0.498059	-27.4195	0.442106	-0.229357		1.30229	111.583	-0.479053	1.21098
2.20436	-137.343	-1.62112	-1.4937		1.30138	74.0286	0.358085	1.25115		2.0789	147.243	-1.7483	1.12484		1.43139	-179.628	-1.43136	-0.0092885		3.89313	-105.706	-1.05388	-3.74777
1.57034	-96.9749	-0.190695	-1.55872		3.40829	-71.4621	1.0836	-3.23144		1.36893	-170.249	-1.34915	-0.231846		0.22623	49.5949	0.146639	0.17227		3.3157	-68.7341	1.20259	-3.08992
0.716835	-72.5937	0.214438	-0.684009		3.31483	-58.6848	1.72287	-2.83193		1.67466	-178.741	-1.67425	-0.0367874		1.74999	-142.077	-1.38046	-1.07554		2.60191	-131.602	-1.72754	-1.94565
2.95637	-160.773	-2.79148	-0.973547		1.65788	-155.385	-1.50722	-0.690552		1.86291	149.749	-1.60923	0.938505		3.01975	-166.881	-2.94093	-0.685427		1.88339	-87.2633	0.0899242	-1.88125
2.11227	-169.405	-2.07626	-0.388372		1.224	-149.266	-1.05208	-0.625532		1.00471	86.1208	0.0679719	1.00241		1.60296	-169.384	-1.57552	-0.29531		2.01863	-111.138	-0.727954	-1.8828
0.987849	-148.346	-0.84089	-0.518411		2.1056	-173.581	-2.09239	-0.235415		1.95137	119.643	-0.965128	1.69599		2.75084	-176.556	-2.74587	-0.165271		1.45431	-72.7461	0.431355	-1.38886
0.730926	-7.98462	0.723839	-0.101531		0.494824	13.6212	0.480906	0.116532		2.14765	76.139	0.514508	2.08511		1.52715	171.533	-1.5105	0.224846		2.28318	-31.5651	1.94538	-1.19517
0.0694052	-13.4564	0.0674998	-0.0161509		0.220036	79.4076	0.0404473	0.216287		3.38198	98.103	-0.476697	3.34821		0.230331	58.1599	0.121511	0.195671		2.15298	4.5281	2.14626	0.169973
2.43731	-127.932	-1.49827	-1.92241		2.57261	164.792	-2.48251	0.674858		0.424198	43.4458	0.307978	0.291708		0.905944	129.395	-0.574974	0.7001		2.43285	32.5492	2.05072	1.30893
3.70945	-143.064	-2.965	-2.22908		0.761429	134.314	-0.531927	0.544819		0.529146	115.368	-0.226705	0.478122		1.41469	123.531	-0.781456	1.17927		2.32303	-145.246	-1.90861	-1.32426
1.92478	-53.9571	1.13252	-1.55633		1.80876	144.756	-1.47721	1.04377		1.56425	139.795	-1.19468	1.00976		2.59291	145.949	-2.14833	1.45186		2.47576	-151.16	-2.16869	-1.19422
2.78405	-157.649	-2.57489	-1.05872		1.63002	-114.971	-0.688123	-1.47765		1.21982	117.287	-0.55923	1.08408		1.33259	88.0402	0.0455718	1.33181		2.67968	103.35	-0.618726	2.60727
3.70468	-163.395	-3.55018	-1.05872		1.6086	-146.302	-1.33832	-0.89247		2.507	151.544	-2.20411	1.19454		3.35159	-115.255	-1.42995	-3.03124		3.33484	111.515	-1.22304	3.10247
1.28071	-39.716	0.985146	-0.818349		1.77419	-149.799	-1.53338	-0.89247		1.45046	91.5576	-0.039427	1.44993		3.72171	-140.225	-2.86038	-2.38104		1.40879	83.8806	0.150177	1.40076
3.6551	-171.527	-3.6152	-0.538569		0.651621	-72.3315	0.197773	-0.620883		2.27831	112.062	-0.855768	2.11148		2.65105	-137.358	-1.95011	-1.79587		1.77409	-74.7449	0.466794	-1.71158
0.524881	160.334	-0.494263	0.176646		2.82628	-168.419	-2.76875	-0.567373		3.164	-47.4967	2.1377	-2.33262		1.64333	-110.843	-0.584701	-1.53579		1.21379	-64.0935	0.530311	-1.09182
3.03965	175.44	-3.03002	0.241665		1.30651	-151.051	-1.14326	-0.632392		2.22543	-73.1636	0.644572	-2.13004		3.77234	-155.976	-3.44556	-1.53579		3.15902	-39.9428	2.42198	-2.02817
2.41741	163.247	-2.31481	0.696802		2.0764	-171.489	-2.05353	-0.307295		3.63822	-31.4755	3.1029	-1.89964		2.36654	-145.491	-1.95011	-1.34073		2.03419	-67.9166	0.764766	-1.88496
3.30244	-101.118	-0.636809	-3.24046		1.61251	170.138	-1.58868	0.276192		2.17668	-40.8437	1.64665	-1.42354		4.36178	-165.655	-4.22579	-1.08065		2.17238	-56.5991	1.19588	-1.81359
2.75343	-73.2355	0.794194	-2.63641		0.9718	163.666	-0.932578	0.273302		3.32067	-20.0411	3.11959	-1.13797		3.03534	-160.452	-2.86038	-1.01563		1.66691	-100.677	-0.308843	-1.63805
2.6043	-101.07	-0.500036	-2.55584		0.164294	-28.224	0.14476	-0.077698		2.67358	-89.2301	0.0359224	-2.67334		0.943216	-110.131	-0.324623	-0.885594		2.27753	-37.478	1.80742	-1.38578
2.27474	-81.1458	0.350129	-2.24763		0.130259	84.9172	0.0115403	0.129746		2.55377	-80.9452	0.401912	-2.52195		2.78728	-168.399	-2.73034	-0.560497		1.5148	-129.033	-0.953978	-1.17667
2.83969	-129.399	-1.8024	-2.19435		0.789071	42.2243	0.584322	0.530283		2.23112	-103.526	-0.521832	-2.16924		3.25901	-175.858	-3.2505	-0.235399		0.633837	-24.3856	0.577291	-0.261696
2.28912	-139.557	-1.74214	-1.48493		0.640116	-48.7892	0.421729	-0.481553		2.14626	-60.5727	1.0545	-1.86935		0.586091	-176.053	-0.584701	-0.0403406		0.312959	69.7443	0.10835	0.293605
1.53408	-47.1225	1.04384	-1.12419		1.26907	-14.9926	1.22587	-0.328302		2.0038	-136.751	-1.45953	-1.37295		0.57854	107.696	-0.175858	0.551164		1.46334	163.038	-1.39968	0.426911
1.63822	-131.717	-1.09015	-1.22284		2.04292	-0.826324	2.04271	-0.0294621		1.25735	-25.1438	1.13821	-0.534237		2.43203	145.401	-2.00191	1.38097		1.91567	-104.598	-0.482834	-1.85383
0.889361	-159.285	-0.831867	-0.31458		1.81848	11.4091	1.78255	0.359718		1.27193	-173.79	-1.26447	-0.137583		3.74022	156.194	-3.42198	1.50972		1.9765	-64.5682	0.84878	-1.78497
0.200506	-42.3832	0.148105	-0.135158		0.844673	144.562	-0.688193	0.489757		0.436744	142.856	-0.348139	0.263714		2.04024	121.825	-1.07588	1.73351		0.554432	-122.646	-0.29909	-0.46684
0.503556	-20.6103	0.471327	-0.177257		0.756879	92.1548	-0.0284578	0.756344		2.72209	-70.6978	0.89979	-2.56908		3.99665	149.368	-3.43895	2.03637		1.27914	-26.5241	1.1445	-0.57123
1.32667	-9.39165	1.30889	-0.21649		2.35108	-134.397	-1.64487	-1.67988		1.52345	-71.8875	0.473616	-1.44796		2.65359	119.987	-1.32627	2.29838		1.86008	-11.7544	1.82107	-0.37893
3.46389	-164.59	-3.33936	-0.920432		1.77574	-178.245	-1.77491	-0.0543913		2.20596	-41.3534	1.6559	-1.45748		1.18819	-11.1192	1.16589	-0.229143		1.11198	-9.15234	1.09782	-0.176871
1.62471	-153.483	-1.4538	-0.725374		0.279661	164.853	-0.269946	0.0730725		0.899553	-52.4702	0.547985	-0.713378		1.65169	-111.735	-0.611648	-1.53427		1.26426	20.2892	1.18582	0.438395
2.75428	-167.517	-2.68917	-0.595335		2.75788	175.723	-2.7502	0.205687		2.84336	177.482	-2.84061	0.124917		1.03527	-40.9162	0.78232	-0.678054		3.14631	9.06106	3.10705	0.495503
2.16903	178.551	-2.16834	0.0548433		0.254231	125.996	-0.14942	0.205687		3.93714	151.707	-3.46678	1.86615		1.83946	-21.5919	1.71038	-0.676908		1.72019	24.3645	1.56699	0.70965
3.53485	177.005	-3.53002	0.184669		0.415743	74.5635	0.110658	0.400745		1.46907	-53.7197	0.869304	-1.18427		0.83461	-162.942	-0.797894	-0.244827		0.92124	87.1565	0.0457006	0.920105
0.862268	148.932	-0.738581	0.444977		3.05287	144.653	-2.49012	1.76615		2.10893	-24.5941	1.91761	-0.877711		0.918865	-34.7446	0.755032	-0.523679		2.55057	114.028	-1.03853	2.32956
3.90212	171.526	-3.85952	0.575016		0.904658	-44.6391	0.643706	-0.635648		0.551467	169.509	-0.542248	0.100416		1.52753	-109.93	-0.520679	-1.43605		2.91218	51.0653	1.83011	2.26528
0.607432	122.864	-0.329619	0.51022		1.05133	-34.4048	0.867419	-0.594042		0.601161	12.5598	0.586775	0.130727		0.560098	-164.702	-0.540253	-0.147772		2.85747	61.3705	1.36914	2.50811
2.55953	162.842	-2.44562	0.755103		0.83011	28.7375	0.727866	0.399115		1.49325	32.2206	1.26329	0.796173		0.958774	7.16639	0.951284	0.119608		1.50638	-69.9411	0.516665	-1.415
1.16509	84.7468	0.106673	1.16019		1.49936	31.4101	1.27964	0.781407		1.59673	-41.2301	1.20085	-1.05238		2.01529	29.8066	1.74868	1.00175		0.808174	-113.619	-0.323801	-0.740471
4.31806	158.278	-4.01144	1.59814		2.56798	-149.695	-2.21707	-1.29581		1.17508	0.300875	1.17507	0.00617065		1.68053	113.729	-0.676267	1.53845		1.24189	-147.924	-1.05231	-0.65949
2.86323	144.595	-2.33377	1.65881		2.47529	-153.596	-2.21707	-1.10075		1.33312	-109.71	-0.449604	-1.25501		2.1414	78.1728	0.438902	2.09594		1.86281	-169.659	-1.83255	-0.334392
2.30125	119.372	-1.1287	2.00545		1.38059	-135.322	-0.981703	-0.970714		0.59016	-31.4221	0.503613	-0.307673		1.71081	-113.537	-0.683205	-1.56847		0.650137	122.105	-0.345533	0.550714
2.92106	127.586	-1.78172	2.31476		3.00252	-167.583	-2.93229	-0.645616		0.723963	135.158	-0.513329	0.510505		1.55022	-37.6483	1.22742	-0.946893		1.40464	-31.6271	1.19602	-0.736579
4.23892	139.514	-3.22396	2.75219		1.69295	-164.565	-1.6319	-0.450558		1.64715	150.991	-1.4405	0.798784		0.163245	117.657	-0.0757758	0.144593		0.395005	-55.5919	0.223211	-0.325893
4.14772	131.02	-2.72225	3.12936		2.16047	-174.942	-2.15205	-0.19048		2.67925	161.143	-2.53545	0.865949		1.72638	31.7411	1.46818	0.908218		2.86605	85.5239	0.223674	2.8573
2.90046	-82.245	0.391379	-2.87394		3.71496	176.922	-3.7096	0.19948		1.0028	56.8598	0.548223	0.839683		1.03848	-149.959	-0.898977	-0.519881		3.1887	107.668	-0.967793	3.03829
2.76086	-100.485	-0.502404	-2.71476		1.57265	172.739	-1.56004	0.198766		1.61698	109.839	-0.548773	1.52102		0.216273	-5.59007	0.215244	-0.0210672		0.459655	139.399	-0.348996	0.29914
2.91008	-53.9357	1.71314	-2.35238		1.11509	130.691	-0.727017	0.845506		2.90164	135.941	-2.08519	2.01779		1.5103	-24.6426	1.37275	-0.629731		1.04473	175.729	-1.04183	0.0778127
2.36714	-52.6029	1.43765	-1.88056		2.65524	154.03	-2.38711	1.16274		2.24597	78.4917	0.448093	2.20081		3.08578	-11.3357	3.02558	-0.60653		0.736696	58.9937	0.379496	0.63143
2.10422	-51.4461	1.31146	-1.64555		2.208	145.835	-1.82696	1.23995		3.09096	91.741	-0.0939092	3.08953		1.63022	-122.598	-0.878263	-1.37341		1.352	138.529	-1.01304	0.895344
1.81644	-115.052	-0.769167	-1.64555		1.67289	121.058	-0.863063	1.43307		1.02412	157.113	-0.943497	0.398303		1.27539	-36.4269	1.02619	-0.75732		1.18336	84.7893	0.107471	1.17847
2.41888	-31.4771	2.06294	-1.26304		2.56976	124.933	-1.47149	2.10674		1.45274	-140.897	-1.12734	-0.916275		0.404018	127.489	-0.245888	0.320578		1.88868	119.902	-0.941529	1.63726
1.90743	-42.4905	1.40652	-1.28841		2.56826	112.161	-0.968768	2.37854		0.653289	-31.3071	0.558166	-0.339465		2.26351	-100.134	-0.398251	-2.2282		2.90896	-53.544	1.72852	-2.33971
1.92963	-159.675	-1.80948	-0.670254		1.40512	-110.137	-0.483735	-1.31923		0.953305	5.83684	0.948363	0.0969472		0.929523	-37.2659	0.739747	-0.56284		3.96535	-50.7177	2.51062	-3.06932
0.814296	-27.4003	0.722943	-0.374742		0.896013	-30.7585	0.769971	-0.45824		1.98889	170.811	-1.96336	0.317603		3.11536	-46.3344	2.15099	-2.25359		1.44988	60.884	0.705483	1.26667
1.0041	-163.8	-0.964225	-0.280137		0.126269	157.688	-0.116815	0.0479381		2.28883	142.293	-1.81082	1.39989		3.81808	-24.2054	3.4824	-1.56545		2.07348	-127.957	-1.27532	-1.63489
1.23675	168.908	-1.21364	0.237929		1.52351	-8.00409	1.50867	-0.21214		2.33617	121.219	-1.21086	1.99787		1.75351	-109.726	-0.591836	-1.65061		1.48049	-111.257	-0.536743	-1.37977
0.270393	31.8258	0.229741	0.142589		1.05463	8.55163	1.0429	0.156824		2.54711	65.7038	1.04802	2.32151		2.60721	-28.9962	2.2804	-1.26385		1.91518	-33.5269	1.59655	-1.05781
1.22191	-130.732	-0.797319	-0.925935		2.42151	15.0541	2.3384	0.628939		2.9989	51.958	1.84804	2.36181		2.23663	-2.43254	2.23462	-0.0949294		0.95764	-22.3402	0.885762	-0.364003
0.0231775	75.0403	0.00598305	0.022392		1.18868	144.033	-0.962068	0.698133		1.2724	-69.8819	0.437652	-1.19477		0.846813	-172.676	-0.839904	-0.10795		0.0410428	82.3104	0.00549181	0.0406737
1.4476	-179.38	-1.44751	-0.0156616		2.43412	15.6983	2.34333	0.658607		0.657229	171.937	-0.650732	0.092187		1.86328	-85.9335	0.132135	-1.85859		2.59682	-66.4959	1.03565	-2.38137
0.391121	69.0458	0.139873	0.365255		1.46107	119.371	-0.716599	1.27327		0.983258	48.7758	0.647975	0.739544		1.50693	-111.633	-0.555534	-1.40079		3.05819	-31.2076	2.61566	-1.58457
1.93596	143.404	-1.5543	1.15416		1.21836	89.4381	0.011949	1.2183		1.97207	-2.31769	1.97046	-0.0797512		0.104682	-36.107	0.0845744	-0.0616886		2.76984	-15.2836	2.67188	-0.730125
1.92752	35.0539	1.57789	1.10707		1.70665	64.6319	0.731184	1.54209		0.988292	-4.37027	0.985419	-0.0753096		1.49629	-76.2742	0.355034	-1.45356		0.198177	-63.4884	0.0884622	-0.177338
1.31429	100.609	-0.241958	1.29182		2.9244	31.8543	2.48397	1.54339		0.0759029	59.8295	0.0381469	0.0656206		2.40486	-17.5513	2.29291	-0.725207		2.59515	-166.211	-2.52036	-0.618541
1.31962	-9.36741	1.30203	-0.214788		1.7385	85.4581	0.137669	1.73304		0.823404	76.4281	0.193224	0.800412		1.13308	-128.788	-0.709807	-0.883196		0.794374	-135.829	-0.569776	-0.553521
0.023823	-11.3626	0.0233561	-0.00469357		0.50816	-84.118	0.0520761	-0.505485		1.8685	46.9362	1.27583	1.36511		2.14725	3.43374	2.14339	0.128608		1.25766	-78.6859	0.246737	-1.23322
0.313695	127.557	-0.191213	0.248681		0.188617	39.1792	0.146211	0.119158		1.62212	69.8957	0.557573	1.52328		3.90952	-21.2117	3.64465	-1.41452		0.732419	-103.818	-0.174934	-0.711221
0.600929	38.3753	0.471105	0.373063		0.673748	80.3187	0.113303	0.664152		4.09009	-101.14	-0.790237	-4.01302		3.04596	-20.6021	2.85116	-1.0718		1.58697	-5.90516	1.57855	-0.163271
1.28672	51.4469	0.801935	1.00625		1.30361	123.621	-0.72181	1.08553		1.73737	-78.5234	0.345681	-1.70263		0.68073	-48.1911	0.453808	-0.507397		0.136891	-17.4971	0.130557	-0.0411572
2.11498	30.9795	1.81328	1.08865		3.28656	-124.344	-1.85413	-2.71361		2.25513	-50.5058	1.43427	-1.74026		3.53241	-88.0184	0.122145	-3.5303		0.436788	-134.468	-0.305974	-0.311711
2.58256	-79.1853	0.484574	-2.53669		3.26457	-118.681	-1.56679	-2.86402		0.487459	-25.3681	0.440455	-0.208843		3.0519	-108.373	-0.961946	-2.89634		2.0564	-117.865	-0.96113	-1.81797
1.527	-84.8752	0.1364	-1.52089		3.45773	-137.323	-2.54208	-2.34386		0.679015	-104.093	-0.165343	-0.658576		0.799729	-96.3853	-0.0889405	-0.794767		1.64061	-27.2004	1.45918	-0.749928
1.94694	-62.7659	0.890973	-1.73111		3.54943	-132.809	-2.41204	-2.60394		1.85426	7.48662	1.83845	0.2416		0.907186	-123.332	-0.498483	-0.757959		1.74268	177.777	-1.74136	0.0675945
2.55185	-44.3196	1.82573	-1.78287		2.32844	-106.071	-0.644588	-2.23744		0.647953	163.256	-0.620479	0.186677		2.77554	178.198	-2.77417	0.0872947		0.94778	55.8911	0.531484	0.784736
1.7453	-97.5627	-0.229702	-1.73012		1.14442	-141.913	-0.900743	-0.705952		0.405878	138.691	-0.304882	0.267926		0.125449	-61.8023	0.0592765	-0.110561		0.0270006	16.0935	0.0259425	0.00748474
0.749442	-126.314	-0.443829	-0.603887		0.463817	-66.0709	0.188126	-0.423951		1.01454	19.634	0.955557	0.340898		1.78097	88.2943	0.053011	1.78019		0.829704	18.4732	0.786951	0.2629
2.21452	-14.5829	2.14317	-0.557573		0.490638	-11.688	0.480465	-0.0993949		1.63582	157.253	-1.50858	0.632518		2.46447	63.1426	1.11338	2.19864		0.632664	121.121	-0.326988	0.541611
1.74235	-19.6525	1.64086	-0.585977		2.35967	-86.2058	0.156145	-2.35449		1.54929	68.388	0.570635	1.44038		2.43845	98.9776	-0.380517	2.40858		0.659287	42.2235	0.488222	0.443057
0.404287	-50.4774	0.257281	-0.311856		2.576	-110.074	-0.884167	-2.41951		1.69285	-68.0582	0.632557	-1.57022		0.900577	-65.6321	0.371573	-0.820349		1.28268	64.2779	0.556692	1.15558
0.040085	86.5201	0.0024331	0.040011		1.83358	-66.4924	0.731363	-1.68141		1.0147	-65.9261	0.413911	-0.926441		1.23558	-45.8936	0.859958	-0.887208		2.12736	66.0878	0.862296	1.94477
1.85717	22.73	1.71293	0.717588		1.7944	-99.5916	-0.298991	-1.76932		1.16744	-11.7942	1.1428	-0.238622		1.37875	-7.42819	1.36718	-0.17825		2.23439	-24.5516	2.03238	-0.92842
1.31944	-71.1125	0.427116	-1.24839		1.37936	-53.1446	0.827335	-1.10369		0.901131	170.298	-0.888243	0.151855		2.23068	40.6153	1.6933	1.45212		2.74066	-21.0539	2.55771	-0.984572
0.955704	-110.927	-0.341352	-0.892664		0.745541	-58.7808	0.386424	-0.63758		1.9613	23.2675	1.80179	0.774759		0.0294029	20.328	0.0275717	0.0102144		1.01796	-3.21593	1.01635	-0.0571065
1.2281	-25.1207	1.11194	-0.52136		0.763874	-26.6012	0.683014	-0.342046		1.22637	36.0237	0.991858	0.721254		1.13653	168.684	-1.11443	0.223017		0.539157	103.779	-0.128411	0.523642
0.327865	-50.3382	0.209262	-0.252399		0.0295256	-22.2709	0.027323	-0.0111898		1.37905	120.176	-0.693185	1.19217		1.82554	130.247	-1.17945	1.39337		1.37338	76.8561	0.312303	1.3374
0.618292	-150.177	-0.536411	-0.307488		1.40653	-176.788	-1.40432	-0.0788115		1.87904	48.5968	1.24271	1.40942		2.88227	-105.462	-0.768393	-2.77796		2.3634	-152.147	-2.08959	-1.10421
1.42526	-1.75853	1.42459	-0.0437375		1.85477	-107.069	-0.544409	-1.77307		2.11496	127.083	-1.27527	1.68723		2.95308	-91.4871	-0.0766396	-2.95208		0.858478	-10.6497	0.843691	-0.158651
0.868814	-172.565	-0.861508	-0.11243		2.04778	-120.981	-1.0541	-1.75564		2.00645	96.0864	-0.212741	1.99514		2.74419	-59.7587	1.38209	-2.37074		1.64694	115.882	-0.718917	1.48175
2.12946	0.473809	2.12939	0.0176094		1.91523	-136.517	-1.38966	-1.31794		1.17046	-11.0519	1.14875	-0.224375		2.57468	-125.75	-1.50426	-2.08954		0.956422	-75.6021	0.237818	-0.926383
1.92391	18.4668	1.82484	0.609407		1.52679	-145.59	-1.25962	-0.862799		0.623233	-169.016	-0.611815	-0.118751		1.80219	-71.6023	0.56879	-1.71007		2.13301	-173.955	-2.12116	-0.224613
0.557309	101.29	-0.109103	0.546526		1.05633	-120.403	-0.534582	-0.911069		0.330228	29.6989	0.286849	0.163609		0.0809144	-46.1668	0.0560381	-0.0583683		3.16161	178.18	-3.16001	0.100438
1.49805	123.819	-0.833781	1.24458		1.15556	-7.33765	1.1461	-0.147584		0.467185	86.3184	0.0299991	0.466221		3.81948	-67.7185	1.44818	-3.53429		1.40537	117.274	-0.643996	1.24914
1.52676	49.0032	1.00158	1.15232		1.28464	-6.59689	1.27614	-0.147584		1.31418	124.327	-0.741088	1.0853		3.43947	-84.1618	0.349863	-3.42163		2.63011	130.323	-1.70195	2.00521
1.3181	85.6994	0.0988439	1.31439		0.671286	21.1798	0.625942	0.242533		2.83442	35.5767	2.30534	1.64904		3.14379	-108.431	-0.993962	-2.98253		4.44344	152.892	-3.95532	2.02476
2.02503	41.0212	1.52782	1.32911		1.49105	13.6325	1.44905	0.351431		2.33971	48.4895	1.55066	1.75206		2.20237	-88.8289	0.0450136	-2.20191		1.06326	-100.85	-0.200153	-1.04425
2.12603	48.9476	1.39627	1.60326		0.583531	34.9571	0.478251	0.334342		1.83413	83.4302	0.20985	1.82208		1.46417	-113.007	-0.572268	-1.3477		0.879077	15.117	0.848656	0.229256
2.66766	41.0592	2.0115	1.75222		1.20173	125.867	-0.704106	0.973857		2.77295	57.6009	1.48578	2.3413		0.770409	-33.8588	0.639757	-0.429232		0.561324	120.184	-0.282224	0.485215
2.23681	72.502	0.672547	2.13331		1.05021	56.8331	0.574548	0.879111		2.61645	111.473	-0.957792	2.43484		0.776389	-96.188	-0.0836885	-0.771865		0.65274	38.7731	0.508897	0.40877
2.38817	101.864	-0.490988	2.33715		1.93578	36.5378	1.55533	1.15247		2.96467	65.4963	1.2296	2.69765		2.2627	-15.0496	2.18509	-0.587523		1.25072	61.5948	0.594973	1.10014
2.22557	-25.0864	2.01563	-0.943609		1.53872	112.409	-0.58659	1.42252		1.96263	-150.742	-1.71226	-0.959208		2.61447	-92.3038	-0.105095	-2.61236		2.09259	64.1016	0.913992	1.88243
0.944182	-53.2752	0.564595	-0.756778		1.86015	127.391	-1.12958	1.4779		2.89417	-162.003	-2.75257	-0.894188		2.67698	-74.5014	0.71533	-2.57964		1.26162	-36.1992	1.01809	-0.745108
0.340426	71.0409	0.110602	0.321958		2.09381	68.3	0.774181	1.94543		3.04447	-171.708	-3.01265	-0.439052		2.14217	-135.868	-1.53752	-1.49162		2.57672	-22.9949	2.37197	-1.00659
2.69397	10.8091	2.64618	0.505222		2.38991	72.3688	0.72388	2.27765		0.799127	-146.839	-0.66898	-0.437115		0.668892	-88.7317	0.0148058	-0.668728		0.736096	-126.756	-0.440484	-0.589754
0.715412	94.8087	-0.0599721	0.712894		0.976179	-125.423	-0.565795	-0.795489		2.2537	-172.119	-2.23241	-0.309013		1.09552	-18.0077	1.04186	-0.338675		2.81114	1.17751	2.81055	0.057769
2.40771	28.9833	2.10617	1.16666		0.899062	-42.1726	0.666318	-0.603599		3.73072	176.758	-3.72475	0.210968		2.47143	-59.5953	1.2508	-2.13154		1.29046	20.4852	1.20886	0.451616
1.43121	62.9992	0.649774	1.27521		0.414065	-59.2855	0.211488	-0.355981		0.60169	10.9046	0.590826	0.113824		3.60147	-43.6368	2.60649	-2.48532		0.881649	-66.6099	0.350006	-0.809198
3.36839	-43.9658	2.42441	-2.33843		2.20851	-172.838	-2.19128	-0.275333		1.09738	165.424	-1.06206	0.276163		2.12437	-108.061	-0.658616	-2.01969		1.19714	5.09801	1.1924	0.106377
3.90113	-33.1306	3.26691	-2.13216		1.53072	-164.643	-1.47607	-0.405372		2.92087	169.462	-2.8716	0.534194		0.426044	-75.8768	0.103958	-0.413166		0.464537	93.6713	-0.0297457	0.463584
2.63811	-46.6038	1.81249	-1.91691		1.51917	4.33324	1.51483	0.114784		1.37868	121.847	-0.727458	1.17113		0.864638	154.362	-0.779509	0.374119		1.53545	-171.788	-1.51971	-0.21932
1.859	-57.5858	0.996492	-1.56936		2.235	168.649	-2.19128	0.439882		0.926613	87.6544	0.037923	0.925837		2.90521	157.737	-2.68864	1.10065		1.65025	176.331	-1.64687	0.105593
3.57566	-18.3062	3.3947	-1.1231		1.15105	17.4887	1.09784	0.34591		4.59215	159.921	-4.31304	1.57655		0.794438	71.5428	0.251516	0.753573		0.775027	21.0414	0.723349	0.278268
4.06361	-10.0301	4.0015	-0.707744		1.20227	145.565	-0.991594	0.679846		1.92111	71.1104	0.621951	1.81765		2.12635	143.923	-1.71858	1.25214		0.463357	109.31	-0.153221	0.43729
0.881492	-20.2525	0.826995	-0.305135		0.896181	88.9814	0.015931	0.89604		2.05819	104.491	-0.515026	1.99271		1.31471	102.116	-0.275946	1.28542		2.12032	25.5283	1.91331	0.913766
1.89504	-5.84703	1.88518	-0.193053		2.91944	148.447	-2.48783	1.52768		4.88267	151.346	-4.28471	2.34131		3.24254	76.5596	0.753675	3.15373		0.886949	87.546	0.0379772	0.886136
3.12205	6.22182	3.10366	0.338362		1.62433	104.58	-0.408904	1.57202		2.98346	107.221	-0.883274	2.84971		0.701305	35.3418	0.572066	0.405672		1.35198	77.1297	0.301146	1.31801
1.28374	28.8055	1.12489	0.618555		1.58982	-99.8782	-0.272741	-1.56625		5.37172	143.409	-4.31304	3.20204		1.34971	69.9002	0.463836	1.2675		4.18728	-179.424	-4.18706	-0.0420714
4.5078	9.25598	4.44911	0.72506		1.8269	-151.196	-1.60086	-0.880226		3.6009	116.306	-1.59578	3.22799		1.71081	37.1661	1.36332	1.03355		1.32843	-93.2073	-0.0743236	-1.32635
2.06927	22.4274	1.91276	0.789454		2.31117	-161.059	-2.18603	-0.750187		1.70395	-124.25	-0.958994	-1.40846		0.759667	149.556	-0.654926	0.384923		1.71323	-156.973	-1.57672	-0.670154
2.88764	24.0398	2.63717	1.17634		2.27967	-170.912	-2.25105	-0.36007		0.263296	-115.993	-0.115392	-0.236663		0.178162	115.686	-0.0772225	0.160556		2.04097	-10.6787	2.00562	-0.378194
1.84107	-20.992	1.71888	-0.659539		1.73125	-178.843	-1.7309	-0.0349726		1.16039	138.796	-0.873037	0.764401		0.487646	12.5288	0.476034	0.105785		0.216064	167.962	-0.211313	0.045061
1.20079	-20.5631	1.12429	-0.421766		3.43368	174.074	-3.41533	0.354514		2.67546	164.378	-2.57663	0.720468		0.698014	129.806	-0.446858	0.536229		2.81848	-62.9621	1.28123	-2.51044
0.672057	-150.181	-0.583078	-0.334186		0.870401	156.598	-0.798804	0.345701		0.652083	-85.1629	0.0549857	-0.64976		1.2795	22.7144	1.18026	0.494063		2.40896	-48.0491	1.61038	-1.79159
0.344903	142.151	-0.272345	0.211627		0.429621	68.234	0.159311	0.398992		0.630641	3.50997	0.629458	0.0386093		0.875352	59.3003	0.446901	0.752675		2.50311	-18.4846	2.37397	-0.79361
0.19771	75.0289	0.0510751	0.190999		0.701267	104.066	-0.17043	0.680242		1.18229	-83.4121	0.135641	-1.17448		1.89144	141.044	-1.47084	1.18919		0.565544	-48.9068	0.371724	-0.426217
3.0743	8.75614	3.03847	0.467998		1.35531	-163.822	-1.30164	-0.377613		1.45714	-48.4775	0.965958	-1.09095		0.548693	-5.45206	0.546211	-0.0521329		2.87244	-2.66919	2.86932	-0.133767
1.08524	152.294	-0.960815	0.504566		1.59535	10.5126	1.56857	0.291075		1.31763	-146.506	-1.09883	-0.727135		0.506226	91.4122	-0.0124764	0.506072		3.45852	13.8068	3.35859	0.825373
0.822658	44.5874	0.58588	0.577503		2.28623	16.8386	2.18821	0.662266		1.17013	-30.7745	1.00536	-0.598709		0.512728	44.8006	0.363813	0.36129		1.49312	77.6871	0.318407	1.45877
2.34328	13.114	2.28217	0.531668		0.947468	60.6496	0.464401	0.82585		0.731319	7.89524	0.724386	0.100456		0.986553	-91.1552	-0.019889	-0.986352		1.84931	64.9138	0.784075	1.67487
2.12057	26.3547	1.90017	0.941378		1.64942	83.2521	0.193808	1.63799		0.727939	128.047	-0.448635	0.573255		1.48316	-132.665	-1.00515	-1.09061		1.65886	-62.9682	0.753928	-1.47764
1.11383	70.5016	0.371776	1.04995		1.88336	68.0102	0.705209	1.74635		1.09966	40.6355	0.8345	0.716149		0.959341	-19.1183	0.906428	-0.314203		0.898988	-93.3773	-0.0529594	-0.897426
1.56368	116.644	-0.701224	1.39764		3.64954	35.697	2.96385	2.1295		1.32786	139.01	-1.0023	0.870974		0.703558	-148.601	-0.600532	-0.366545		1.44459	2.95682	1.44267	0.0745168
1.42709	95.1436	-0.127942	1.42134		2.55098	73.002	0.745746	2.43954		2.03966	30.3784	1.75963	1.03147		1.26531	179.333	-1.26523	0.0147203		1.35653	25.7785	1.22153	0.589946
2.47631	131.98	-1.65634	1.84083		4.40368	37.1436	3.51028	2.659		2.58887	85.8589	0.186949	2.58211		1.04684	28.8795	0.916651	0.50559		2.12899	-56.5137	1.17464	-1.77561
1.8947	82.0463	0.262175	1.87648		3.6233	56.6507	1.99188	3.02666		2.75026	72.6057	0.822181	2.62449		0.990463	85.4182	0.0791213	0.987298		1.73945	-146.55	-1.45134	-0.958793
2.40341	104.04	-0.583078	2.33161		2.27505	-69.1964	0.80802	-2.12672		1.39821	-127.195	-0.845254	-1.1138		1.57966	119.273	-0.772415	1.37794		1.03976	-32.1644	0.880185	-0.55352
2.81599	55.8558	1.58055	2.33059		2.73483	-56.8511	1.49545	-2.28974		1.30886	-87.1561	0.0649394	-1.30725		2.44364	-39.2451	1.89246	-1.54594		0.672858	-175.865	-0.671106	-0.0485196
3.0027	102.009	-0.624733	2.93699		3.04436	-43.5021	2.20822	-2.09568		2.06934	-151.615	-1.82055	-0.98376		2.5603	-6.56942	2.54349	-0.292916		1.44424	-101.908	-0.298006	-1.41316
3.0003	-82.6911	0.381692	-2.97592		2.09569	-86.5543	0.125957	-2.0919		1.57683	-149.988	-1.36541	-0.788702		1.05788	-9.4044	1.04366	-0.172859		0.763905	-92.8459	-0.037928	-0.762963
2.9916	-102.699	-0.657656	-2.91842		3.32655	-32.9936	2.79008	-1.81146		1.76098	-175.489	-1.75553	-0.138507		2.06432	7.77292	2.04536	0.279194		1.20922	-177.737	-1.20828	-0.0477487
3.01523	-58.2838	1.58514	-2.56494		2.08643	-56.5205	1.15095	-1.74026		2.47853	-142.712	-1.97192	-1.50154		1.51559	-50.8026	0.957846	-1.17454		1.84772	0.484419	1.84765	0.0156217
2.54895	-62.2436	1.18708	-2.25566		1.64083	-81.639	0.238592	-1.6234		1.76834	-132.369	-1.19169	-1.30649		1.27637	-84.4385	0.123699	-1.27037		1.15216	15.6161	1.10963	0.310149
2.04572	-48.3816	1.35869	-1.52935		2.12641	-40.6909	1.61232	-1.38637		1.11478	-94.4428	-0.086354	-1.11143		0.99603	-110.972	-0.356484	-0.930051		0.589242	48.5505	0.390054	0.44166
1.98909	-128.669	-1.24283	-1.55301		3.35284	-21.6232	3.1169	-1.23553		1.08432	-128.266	-0.67153	-0.851349		0.54619	-28.9051	0.478147	-0.264006		0.117363	51.5431	0.0729911	0.0919044
2.52684	-145.727	-2.08809	-1.42297		1.31166	-47.097	0.892928	-0.960803		1.8205	-167.43	-1.77686	-0.396213		1.18885	-7.91967	1.17751	-0.163805		1.75283	150.15	-1.52028	0.872444
1.24059	-62.3708	0.575323	-1.09913		2.52783	-6.9166	2.50944	-0.304413		0.400597	-149.859	-0.346432	-0.201154		1.59857	13.4357	1.55482	0.371433		0.858485	123.189	-0.469933	0.718442
1.33449	-137.428	-0.982754	-0.902812		1.99202	-7.2809	1.97596	-0.252456		0.846169	81.9561	0.118406	0.837844		0.742464	92.273	-0.0294472	0.74188		1.19325	54.3194	0.695981	0.969253
0.882777	-120.906	-0.453416	-0.757435		0.274136	-90	1.6786e-17	-0.274136		0.946958	106.191	-0.26405	0.9094		0.972361	-6.60517	0.965907	-0.111848		1.17735	78.6593	0.231518	1.15436
0.921044	-16.1362	0.884758	-0.255978		2.81456	-85.5639	0.217696	-2.80613		2.91454	-77.8314	0.614353	-2.84905		1.77604	22.7021	1.63844	0.685443		2.49404	113.503	-0.9946	2.28713
0.530748	-173.774	-0.527617	-0.0575583		2.96544	-71.5501	0.938489	-2.81301		2.87221	-67.4736	1.10037	-2.65306		0.102844	58.1096	0.0543319	0.0873206		2.34934	90.8322	-0.03412	2.34909
0.287614	19.765	0.27067	0.0972601		2.76953	-104.362	-0.686999	-2.68297		2.36327	-81.5287	0.348143	-2.33748		3.0023	-136.671	-2.18394	-2.06014		3.74471	-168.286	-3.66672	-0.76027
1.66296	163.096	-1.59111	0.483536		2.58869	-64.3241	1.12163	-2.33309		1.518	-88.6213	0.0365237	-1.51756		1.95661	-141.617	-1.53375	-1.21489		1.73179	-149.659	-1.49459	-0.874804
0.824708	138.306	-0.615817	0.548555		2.30455	-95.7743	-0.231862	-2.29286		1.42651	-127.771	-0.873745	-1.12761		0.242515	-108.736	-0.0778976	-0.229664		3.14533	-168.441	-3.08155	-0.630231
0.939172	79.7101	0.167764	0.924067		2.045	-83.7319	0.223275	-2.03278		1.15197	-3.73614	1.14953	-0.0750647		0.342581	-14.4612	0.331727	-0.0855507		3.42408	174.216	-3.40664	0.345062
3.67754	158.154	-3.41344	1.36846		2.12579	-56.8875	1.16129	-1.78056		1.92257	4.66546	1.9162	0.156377		0.0493476	18.1868	0.0468823	0.0154022		1.57539	160.451	-1.48457	0.527157
1.49306	115.019	-0.63143	1.35297		1.85229	-97.1909	-0.231862	-1.83772		0.901662	32.7608	0.758242	0.487919		1.08215	122.509	-0.581592	0.912584		1.67188	112.329	-0.63519	1.54652
1.82799	55.4289	1.03725	1.50521		1.89307	-115.569	-0.817038	-1.70768		1.6824	-129.065	-1.06024	-1.30627		0.55964	-93.9064	-0.0381264	-0.55834		2.27203	116.227	-1.00409	2.03812
2.18612	81.8147	0.311247	2.16385		2.00977	-39.8974	1.54189	-1.2891		1.04431	-125.411	-0.605106	-0.851135		1.81062	-175.532	-1.80512	-0.141059		0.528081	98.999	-0.0826005	0.521581
3.58935	137.175	-2.63254	2.43991		1.45335	-65.0357	0.613392	-1.31757		0.0454708	-3.0574	0.0454061	-0.00242525		0.0508009	72.0991	0.0156148	0.0483416		1.47366	65.5363	0.610266	1.34136
3.1681	131.799	-2.1116	2.36178		1.57435	-26.6613	1.40696	-0.706438		0.86155	148.57	-0.735145	0.449255		0.463252	41.1798	0.348665	0.305016		2.7633	110.488	-0.967203	2.58851
3.55711	121.852	-1.87716	3.02147		4.99196	-63.3127	2.24199	-4.46017		2.49387	165.124	-2.41029	0.640232		1.67019	160.374	-1.57315	0.560995		0.575081	-138.744	-0.432329	-0.379224
3.37123	77.2651	0.743156	3.2883		4.54971	-79.5814	0.822759	-4.4747		3.25109	162.847	-3.10649	0.958802		1.66885	154.878	-1.51099	0.708502		1.60886	168.16	-1.57463	0.330111
3.58314	101.489	-0.71371	3.51134		4.07005	-82.0244	0.564726	-4.03069		2.5434	138.52	-1.9055	1.68463		2.08217	46.6366	1.42967	1.51376		1.47828	13.6737	1.43639	0.349455
5.19182	133.023	-3.54237	3.7956		3.91072	-94.1135	-0.280528	-3.90065		0.669365	-37.8273	0.528707	-0.41051		2.39107	-148.792	-2.04507	-1.23893		0.94867	36.655	0.761066	0.566352
2.25041	-42.0202	1.67185	-1.50641		4.19059	-53.6831	2.48188	-3.37659		1.30411	-6.56407	1.29556	-0.149078		0.488684	-126.334	-0.28954	-0.393673		0.856451	88.474	0.0228079	0.856147
1.50741	-124.559	-0.855082	-1.24142		4.31484	-40.956	3.25862	-2.82829		2.26036	11.046	2.21848	0.433077		2.43615	-178.387	-2.43518	-0.0685753		1.46839	-83.8646	0.156939	-1.45998
1.5719	-177.409	-1.5703	-0.0710678		2.27676	-90.4621	-0.0183642	-2.27669		0.882555	22.1099	0.817656	0.33218		1.28082	-94.7711	-0.106532	-1.27638		1.99919	-36.0776	1.61579	-1.17729
1.39262	19.0129	1.31665	0.453689		3.2775	-49.176	2.14262	-2.48015		1.13996	44.6247	0.811336	0.800776		1.06045	-163.505	-1.01681	-0.30109		0.562004	-90.8631	-0.00846615	-0.561941
1.57581	36.0564	1.27394	0.927491		2.80034	-47.1416	1.90476	-2.05275		2.4807	25.9774	2.23007	1.08659		0.351564	47.9237	0.23559	0.26095		1.42168	-10.5633	1.39759	-0.260625
1.04123	77.1753	0.23112	1.01525		1.72994	-72.1628	0.529903	-1.64678		1.26005	-102.482	-0.27234	-1.23027		1.84903	-42.5155	1.36291	-1.24956		2.33689	-45.5374	1.63686	-1.66786
1.53552	116.943	-0.695745	1.36885		1.62932	-53.2324	0.975266	-1.3052		1.4122	-147.632	-1.19278	-0.756041		0.0106754	-0.850322	0.0106742	-0.000158426		3.16091	-25.6237	2.85004	-1.36696
2.62753	135.233	-1.86548	1.85037		1.53161	-133.835	-1.06076	-1.10481		1.37054	156.598	-1.2578	0.544349		1.36684	24.2672	1.24606	0.561761		2.83201	7.97136	2.80464	0.392737
1.89031	93.3358	-0.109992	1.88711		2.01527	-40.1663	1.54002	-1.29987		1.16737	31.913	0.990922	0.617107		0.455796	-6.27868	0.453062	-0.0498479		0.0418946	-45.1895	0.0295258	-0.0297218
2.42088	71.2755	0.777145	2.29275		2.24443	-64.027	0.982944	-2.01775		1.1402	128.287	-0.706464	0.894967		1.53809	-58.5902	0.801584	-1.3127		2.29247	-157.434	-2.11695	-0.879747
3.36685	-46.4688	2.31892	-2.44097		1.45762	-85.0146	0.126671	-1.45211		2.70608	153.805	-2.42815	1.19454		1.93413	-46.8304	1.32326	-1.41063		1.82492	149.221	-1.56787	0.933874
2.94503	-44.1354	2.11363	-2.05079		1.58798	-110.373	-0.552814	-1.48865		1.7137	40.0658	1.3115	1.10305		1.92525	-18.428	1.82652	-0.608594		1.02118	-77.7432	0.21679	-0.997902
1.84553	-58.6769	0.959427	-1.57655		1.59846	-123.855	-0.890485	-1.32745		1.60742	-107.641	-0.48713	-1.53183		2.292	27.2273	2.03804	1.04864		1.22588	0.870938	1.22573	0.0186335
3.78591	-18.9921	3.57981	-1.23207		1.0259	-42.8556	0.752055	-0.697768		0.164544	149.971	-0.142458	0.0823443		0.174791	111.626	-0.064418	0.162487		0.0230318	49.4128	0.0149846	0.0174907
1.54504	-18.3995	1.46606	-0.487679		0.872536	-88.7005	0.0197885	-0.872311		1.15117	158.668	-1.07231	0.418757		0.584206	17.6347	0.556753	0.176984		1.72505	20.1498	1.61947	0.594238
3.65088	-9.82688	3.59732	-0.623103		2.21444	-24.0493	2.02222	-0.902435		1.00952	130.532	-0.656056	0.767286		1.53464	27.4034	1.36243	0.70632		1.27265	90.3733	-0.0082907	1.27262
0.512689	-99.988	-0.0889214	-0.504919		1.10905	-133.288	-0.760446	-0.807292		1.66827	133.568	-1.14979	1.20876		1.54529	-34.7577	1.26957	-0.880982		2.49144	34.4961	2.05336	1.41103
4.13034	2.1374	4.12747	0.154046		0.613902	-94.2253	-0.045231	-0.612233		1.69535	-29.4496	1.47629	-0.833532		1.01646	-6.99264	1.0089	-0.123746		0.114163	151.783	-0.100596	0.0539785
1.3874	51.928	0.85554	1.09221		0.676805	-39.2405	0.524184	-0.428131		0.541693	-35.8192	0.439241	-0.317015		2.3618	10.3927	2.32306	0.426054		0.953306	15.9105	0.916786	0.261335
3.33175	19.1304	3.14775	1.09188		1.3446	-20.0647	1.26299	-0.461305		0.234986	155.263	-0.213424	0.0983296		1.33839	18.0559	1.27248	0.414826		2.21843	27.3192	1.971	1.01814
4.40889	16.1272	4.23539	1.22466		0.41252	-51.525	0.256659	-0.322953		2.77355	7.42681	2.75028	0.358508		0.981222	-172.789	-0.973461	-0.123171		2.77849	-69.7288	0.962649	-2.6064
4.23591	24.258	3.8619	1.74031		0.668392	-160.591	-0.630407	-0.222116		0.958556	134.853	-0.676057	0.679542		0.0957109	114.775	-0.0401084	0.0869016		1.53339	-24.1234	1.39947	-0.626699
3.05596	-165.658	-2.96071	-0.757013		0.637095	-171.69	-0.630407	-0.0920773		1.2044	96.5407	-0.137193	1.19656		1.63175	146.672	-1.3634	0.896532		0.733944	172.044	-0.72688	0.101587
3.93699	178.716	-3.936	0.0882408		0.179334	167.779	-0.17527	0.0379617		1.96005	76.8396	0.446262	1.90857		1.6222	-66.1405	0.656171	-1.48357		2.11938	158.711	-1.97476	0.769479
1.35295	165.379	-1.30913	0.341513		1.71072	3.44576	1.70762	0.10282		2.95326	39.1704	2.28958	1.86537		2.68702	-43.2691	1.95653	-1.84175		0.687138	105.79	-0.18698	0.661209
2.28375	146.31	-1.90019	1.2668		1.84321	8.33054	1.82377	0.267051		3.71381	38.3087	2.91416	2.30218		1.93219	-133.043	-1.3188	-1.41213		2.59917	149.022	-2.22844	1.33781
4.74938	147.398	-4.00102	2.55898		1.04701	155.867	-0.955504	0.428079		3.35317	52.7802	2.02825	2.6702		0.476568	-174.289	-0.474202	-0.0474202		3.42616	140.576	-2.6466	2.1758
1.64825	-160.106	-1.5499	-0.560859		0.511446	56.8244	0.279867	0.428079		1.53799	-74.7358	0.404907	-1.48373		1.68408	-24.2378	1.53563	-0.691356		2.57376	117.787	-1.19985	2.27698
2.13546	-178.908	-2.13507	-0.0407033		1.08325	26.3601	0.970618	0.480976		3.32357	-23.3498	3.05138	-1.31728		1.99261	-90.2096	-0.00729	-1.9926		4.45823	138.838	-3.35637	2.93439
0.10625	-84.2894	0.0105723	-0.105723		0.523322	107.434	-0.156793	0.499281		2.33426	-26.8485	2.08263	-1.05423		2.10272	-104.08	-0.511544	-2.03954		2.89965	105.072	-0.754007	2.7999
1.44806	163.728	-1.39006	0.405735		0.628882	82.9743	0.0769211	0.62416		2.60073	-13.3973	2.52996	-0.602597		2.20251	-55.5606	1.2456	-1.81647		4.17859	117.306	-1.9169	3.71297
2.18548	156.554	-2.00503	0.86957		1.37477	33.1789	1.15063	0.752351		0.99909	-31.7952	0.849164	-0.526405		1.74685	-50.0766	1.12106	-1.33966		1.59157	-39.1436	1.23437	-1.0047
0.787501	61.8282	0.371793	0.69421		3.12017	-48.8461	2.05334	-2.34932		0.313726	-71.9119	0.0974054	-0.298222		1.98321	-22.749	1.82893	-0.766899		0.573514	-17.6775	0.546433	-0.174153
2.40329	129.274	-1.52134	1.86046		2.97857	-50.0252	1.91358	-2.28255		2.95114	-3.41682	2.94589	-0.175886		0.674029	-126.172	-0.397817	-0.544111		1.49612	20.0932	1.40506	0.51399
2.33508	54.7626	1.34726	1.90722		2.51305	-45.6719	1.75603	-1.79771		0.666709	72.2167	0.203624	0.634853		0.440692	-18.8232	0.417124	-0.142189		1.22081	48.7339	0.805191	0.917624
2.23392	75.4783	0.560146	2.16255		1.49942	-103.551	-0.35134	-1.45768		0.40013	-85.0457	0.0345557	-0.398635		0.934319	-16.3594	0.896492	-0.263161		1.11784	-51.336	0.698371	-0.872834
3.06205	122.617	-1.65052	2.57914		1.7563	-22.0411	1.62794	-0.65909		1.24173	162.385	-1.18351	0.375777		0.0893066	-36.0274	0.0722255	-0.0525276		1.38003	150.373	-1.19961	0.682232
2.79271	64.0188	1.22342	2.51047		1.32842	-2.59132	1.32707	-0.0600602		0.253061	86.1304	0.0170782	0.252484		0.216475	162.711	-0.206694	0.0643351		1.08573	31.4678	0.926056	0.566772
2.99159	71.8941	0.929707	2.84346		1.38704	-31.1855	1.18661	-0.718225		0.967057	88.1934	0.0304875	0.966577		1.88413	-3.402	1.88081	-0.111806		2.27384	10.2957	2.23722	0.406399
3.12474	105.36	-0.827686	3.01313		0.749293	-44.3621	0.535696	-0.523899		3.08699	-126.761	-1.84748	-2.47312		1.94867	20.2987	1.82765	0.676022		0.505281	-3.4962	0.50434	-0.0308133
2.71034	-63.3702	1.21484	-2.42283		2.11332	-3.41912	2.10956	-0.126037		2.29471	-67.4902	0.878511	-2.11988		0.0400727	56.502	0.0221164	0.0334168		1.70929	-1.57189	1.70865	-0.0468878
2.0021	-77.5451	0.431797	-1.95499		0.266837	-113.388	-0.105923	-0.244913		2.55786	-149.769	-2.21	-1.28785		1.15404	-177.962	-1.15331	-0.0410317		2.14376	22.6055	1.97906	0.824025
2.30407	-58.3092	1.21041	-1.96052		0.283205	-0.505241	0.283194	-0.0024973		1.73975	-132.247	-1.16969	-1.28785		1.30191	164.783	-1.25626	0.341717		1.12187	79.688	0.200823	1.10374
2.54344	-32.3807	2.14795	-1.36212		2.30631	4.53373	2.29909	0.182304		2.03524	-157.84	-1.88491	-0.767692		0.714327	105.621	-0.192345	0.687944		1.72876	41.0821	1.30309	1.13604
3.32003	-21.1919	3.09551	-1.20017		0.999651	9.19342	0.98681	0.159712		1.73296	-85.9227	0.123218	-1.72858		2.3987	128.26	-1.48534	1.88349		2.20743	58.4827	1.15395	1.8818
1.7921	-27.1709	1.59434	-0.818359		0.742787	148.59	-0.63394	0.387107		1.02919	-112.393	-0.392073	-0.951582		2.13742	90.9117	-0.0340083	2.13715		1.04088	-142.322	-0.823811	-0.636215
1.07401	-112.479	-0.41065	-0.992403		1.64027	17.5858	1.56361	0.495579		0.736989	-56.761	0.403968	-0.616411		1.25803	-118.739	-0.604884	-1.10307		2.89325	-164.439	-2.7872	-0.776142
1.08514	-137.556	-0.800767	-0.732325		1.64598	144.221	-1.33535	0.962337		2.67858	-133.652	-1.84898	-1.93807		0.15077	-101.709	-0.0305974	-0.147633		2.33546	-176.909	-2.33206	-0.125947
0.458111	10.9383	0.449789	0.0869272		1.02242	62.5447	0.471391	0.907263		2.10097	-104.592	-0.529311	-2.0332		1.7631	-42.8161	1.2933	-1.19828		0.548918	158.727	-0.511517	0.199151
0.442548	-129.352	-0.28061	-0.342208		2.05281	34.3009	1.6958	1.15684		1.48696	-118.56	-0.710891	-1.30602		1.22946	-104.731	-0.312638	-1.18905		2.91561	-60.4402	1.43836	-2.53612
2.84824	-5.33129	2.83592	-0.264642		1.94322	41.8856	1.44668	1.29738		2.91155	-153.975	-2.61632	-1.27749		1.29694	-127.929	-0.797212	-1.02299		3.1233	-24.0048	2.85317	-1.2706
0.319649	84.9462	0.0281583	0.318406		2.84616	36.3633	2.29194	1.6875		2.68686	-176.326	-2.68134	-0.172159		0.649346	-89.8931	0.00121146	-0.649344		1.5672	-137.037	-1.14686	-1.0681
0.767904	47.688	0.516928	0.567857		1.90273	75.1773	0.486773	1.83941		0.667623	110.476	-0.233545	0.625442		0.134026	45.232	0.0943865	0.0951539		1.04772	-35.2057	0.856082	-0.604028
3.11463	12.7942	3.0373	0.689733		0.786329	-57.7178	0.419971	-0.664784		1.17769	126.207	-0.695664	0.950261		0.99314	34.623	0.817264	0.564276		0.932338	-162.016	-0.886786	-0.287862
0.983043	111.867	-0.366145	0.912311		0.233594	-34.3476	0.192862	-0.131796		2.35039	153.105	-2.09616	1.06321		1.77662	-36.5191	1.42779	-1.05725		0.168306	25.4579	0.151964	0.072346
2.88572	25.3368	2.60814	1.23491		1.01105	165.197	-0.977489	0.258321		2.46747	136.979	-1.80399	1.68345		3.72403	-23.6806	3.41046	-1.49571		3.7161	21.6566	3.45379	1.3714
2.13469	47.2004	1.45038	1.56629		0.928207	25.1703	0.840071	0.394777		2.30994	107.636	-0.69985	2.20137		2.76526	-21.2955	2.57645	-1.00428		3.6111	36.9017	2.88767	2.16826
2.0526	-44.3038	1.46894	-1.43367		0.453385	67.472	0.173707	0.418788		1.01343	-139.64	-0.772227	-0.656281		0.996127	-102.956	-0.223328	-0.970769		2.79741	-86.0637	0.192034	-2.79081
2.6929	-42.4661	1.98649	-1.81812		1.45506	153.536	-1.30259	0.648438		0.969079	161.747	-0.92032	0.303523		1.55126	-51.8962	0.957263	-1.22068		1.83536	-58.4701	0.959792	-1.5644
1.38109	-31.4596	1.17808	-0.720788		1.05712	100.754	-0.197255	1.03855		0.976859	92.4017	-0.040935	0.976001		1.07473	-104.225	-0.264086	-1.04178		1.98345	-156.808	-1.82316	-0.781107
2.79819	-11.8329	2.73873	-0.573792		1.46843	45.0121	1.03812	1.03855		0.784376	176.053	-0.782515	0.0539928		0.331665	-136.402	-0.24019	-0.228716		0.792023	-30.3882	0.683213	-0.40065
2.44817	-21.7248	2.27428	-0.906188		2.18288	30.6905	1.87714	1.11414		2.08192	-158.278	-1.93409	-0.77053		1.47886	-176.174	-1.47556	-0.0986767		1.22802	0.820306	1.2279	0.0175811
0.631164	-52.836	0.381286	-0.50298		2.75727	44.1237	1.97927	1.91964		3.14612	-170.663	-3.10444	-0.510452		1.38571	-3.43204	1.38322	-0.0829547		1.02719	156.352	-0.940938	0.412021
2.17893	-9.26493	2.15051	-0.350807		2.78023	52.6086	1.68831	2.20891		1.54496	-177.948	-1.54397	-0.0553151		0.955919	170.411	-0.942564	0.159232		1.88581	140.786	-1.46109	1.19225
3.50346	-5.19796	3.48905	-0.317403		2.56352	75.3577	0.648016	2.48027		0.460361	162.329	-0.438639	0.139743		0.704324	-97.282	-0.0892756	-0.698643		1.00178	71.3043	0.321112	0.948917
0.094164	52.9831	0.0566915	0.075186		0.593104	-107.438	-0.177734	-0.565847		3.85074	165.3	-3.7247	0.977145		0.760675	-25.0936	0.688879	-0.322601		1.97334	37.6647	1.56209	1.20579
0.0359882	3.86546	0.0359063	0.0024261		1.03721	-175.526	-1.03405	-0.0809132		1.34309	110.116	-0.461919	1.26116		1.13905	-160.502	-1.07372	-0.380183		3.4039	-89.9878	0.000726475	-3.4039
2.24744	-1.59595	2.24657	-0.0625934		1.26741	163.066	-1.21245	0.369152		2.95846	150.871	-2.58428	1.44013		1.5966	-5.91404	1.5881	-0.164508		2.8623	-70.9009	0.936553	-2.70475
1.50247	7.77937	1.48864	0.203372		0.368967	54.5601	0.213945	0.300606		2.56011	100.92	-0.484996	2.51375		1.14634	119.015	-0.556024	1.00247		2.06413	-95.2783	-0.189886	-2.05538
3.08331	11.6458	3.01984	0.6224		0.68795	57.9968	0.364591	0.583394		3.21135	121.418	-1.67401	2.74052		1.05468	76.1186	0.253032	1.02388		0.738339	113.185	-0.290689	0.678708
2.19299	-73.2756	0.631072	-2.10023		1.93833	147.104	-1.62753	1.05275		3.02948	-73.1045	0.880452	-2.89872		2.0171	31.8134	1.71407	1.06332		1.59814	149.464	-1.37649	0.811985
2.82651	-48.2661	1.88153	-2.10927		1.24822	77.8918	0.261825	1.22045		2.11525	-73.332	0.606706	-2.02637		1.45954	106.386	-0.411737	1.40026		1.29816	92.9614	-0.0670666	1.29643
2.28188	-60.6765	1.11753	-1.9895		2.26116	143.357	-1.81429	1.34952		1.94981	-113.477	-0.776755	-1.78841		1.5086	88.8928	0.0291502	1.50832		1.48244	-99.7055	-0.249916	-1.46123
1.95809	-109.988	-0.669318	-1.84015		2.24182	138.702	-1.68425	1.47955		0.508898	-68.4865	0.186624	-0.473444		1.86491	75.215	0.475911	1.80316		2.47204	-166.286	-2.40157	-0.586066
1.96995	-73.9702	0.543977	-1.89335		1.80509	124.949	-1.03405	1.47955		1.6795	-29.1931	1.46617	-0.819181		2.9075	-36.3555	2.34157	-1.72355		1.31305	-71.3153	0.420647	-1.24384
2.0091	-124.821	-1.14722	-1.64936		2.36751	115.898	-1.03405	2.12975		1.33793	-5.74258	1.33122	-0.133873		0.722074	-99.2535	-0.116112	-0.712677		0.606174	0.83737	0.606109	0.00885884
1.40181	-39.5989	1.08013	-0.893524		2.61036	59.9627	1.30665	2.25979		1.03172	10.2787	1.01516	0.184096		1.56875	-26.8789	1.39927	-0.709241		1.87369	132.242	-1.25963	1.38711
3.25258	-160.982	-3.07504	-1.05991		2.5339	82.5087	0.33036	2.51228		0.915259	136.429	-0.663129	0.63084		1.03822	-159.018	-0.969382	-0.371762		2.24166	85.6583	0.169704	2.23523
2.20317	-27.2098	1.95936	-1.0074		2.98317	116.055	-1.31029	2.68001		1.72481	24.3396	1.57151	0.710872		0.463403	1.45803	0.463253	0.0117912		3.37972	-58.9448	1.74348	-2.89531
2.57446	-160.371	-2.42485	-0.864855		1.51947	-106.412	-0.429311	-1.45756		2.59293	34.5228	2.13631	1.4695		3.02452	9.57639	2.98237	0.503166		1.53251	-66.9512	0.599999	-1.41017
1.26955	-132.909	-0.86436	-0.929857		1.90238	-41.0866	1.43386	-1.25024		1.99104	91.9491	-0.0677195	1.98989		1.36817	-16.6027	1.31113	-0.390931		2.99122	-52.4029	1.82496	-2.37001
0.92026	-41.3486	0.690843	-0.607959		1.74829	-148.123	-1.48461	-0.923277		3.64407	33.4527	3.04039	2.00879		1.39755	-167.757	-1.36577	-0.296355		0.76059	11.7174	0.74474	0.154464
0.462324	-107.443	-0.138582	-0.441065		1.91059	-22.4049	1.76636	-0.728218		2.75621	100.579	-0.506036	2.70935		0.733946	1.58314	0.733666	0.020277		1.64251	32.1196	1.39111	0.873302
2.96511	-173.324	-2.945	-0.344699		0.1862	-129.806	-0.119202	-0.143043		3.02577	61.7853	1.43051	2.66625		0.178443	-60.7267	0.0872543	-0.155655		1.19166	175.85	-1.18853	0.0862335
1.62064	-2.5959	1.61898	-0.0734015		1.58609	-167.692	-1.54963	-0.338101		3.88342	46.0693	2.69427	2.79676		0.814388	-123.229	-0.44627	-0.681227		0.0981317	51.7952	0.060692	0.0771124
1.02138	10.1275	1.00546	0.179598		0.631285	-12.2102	0.617004	-0.133516		3.94293	56.9642	2.14954	3.30548		1.31935	-158.377	-1.2265	-0.486169		1.24927	11.2732	1.22516	0.244217
2.47597	168.336	-2.42485	0.500555		0.318537	170.602	-0.314261	0.0520156		0.950132	-74.1996	0.258708	-0.914233		0.322552	-41.7519	0.240635	-0.214789		0.353946	140.668	-0.273773	0.224336
1.144	134.201	-0.797569	0.820134		0.326403	37.8964	0.257572	0.200488		1.08737	-33.2367	0.90949	-0.595987		2.93867	-173.039	-2.91701	-0.35613		2.851	-67.8175	1.07642	-2.63998
0.755626	44.9803	0.534491	0.534124		0.399404	128.611	-0.249241	0.312094		1.37514	-149.932	-1.19009	-0.688975		1.68455	172.244	-1.66914	0.227344		2.29951	-98.6123	-0.344345	-2.27358
2.79896	-138.498	-2.09623	-1.85473		0.718756	123.578	-0.397522	0.59882		1.38805	-162.002	-1.32013	-0.428897		2.28665	157.634	-2.11463	0.870127		2.05445	-59.4267	1.04498	-1.76884
1.87816	-72.3464	0.569571	-1.78971		1.17408	40.4843	0.892986	0.76226		0.998859	132.099	-0.669649	0.741141		1.27513	92.1027	-0.0467848	1.27427		1.88254	-34.3291	1.55463	-1.06165
1.51608	-141.467	-1.18596	-0.944455		3.04926	-101.24	-0.594382	-2.99077		1.2979	48.1419	0.866072	0.966676		1.27694	81.3111	0.192907	1.26228		0.97338	-87.4756	0.0428726	-0.972436
1.33581	-170.118	-1.31599	-0.22924		2.83181	-77.8171	0.597606	-2.76803		1.78173	137.81	-1.32013	1.19659		2.13286	131.719	-1.41938	1.592		1.30171	-127.598	-0.794205	-1.03136
0.796436	177.781	-0.795839	0.0308378		2.9894	-111.059	-1.07418	-2.78974		0.497798	-56.1295	0.277431	-0.413321		2.37681	126.523	-1.41453	1.91006		0.835009	154.975	-0.756623	0.353215
2.30968	172.764	-2.29129	0.290916		2.82554	-55.3798	1.60528	-2.32523		0.827435	-175.92	-0.825338	-0.058869		2.54338	-69.3288	0.897825	-2.37964		1.43912	-104.399	-0.357864	-1.39392
1.13915	136.706	-0.829122	0.781171		2.15176	-92.5682	-0.0964183	-2.1496		1.0302	22.2908	0.953216	0.390764		1.90839	-129.966	-1.22583	-1.46264		2.05439	-157.481	-1.89776	-0.786799
0.906889	105.323	-0.239657	0.87465		2.22015	-59.6003	1.12346	-1.91492		0.533116	55.2621	0.303782	0.438097		0.945429	-81.5757	0.138509	-0.935228		1.20914	-157.552	-1.11752	-0.461701
1.65654	142.601	-1.31599	1.00613		2.11687	-78.5211	0.421272	-2.07453		1.58961	156.02	-1.4524	0.646057		0.673693	-66.4084	0.269622	-0.617387		1.11306	140.013	-0.852821	0.71526
2.26795	141.486	-1.77458	1.41226		2.08448	-105.413	-0.55402	-2.00951		0.578512	103.647	-0.136493	0.56218		0.928959	-165.839	-0.900729	-0.22727		3.21843	137.508	-2.37316	2.17402
2.80744	145.967	-2.32658	1.57123		3.05666	-29.3698	2.66379	-1.49912		1.78448	119.611	-0.881726	1.55143		2.4179	-93.7197	-0.156862	-2.4128		0.538266	-161.696	-0.511031	-0.169051
0.527966	-174.762	-0.525761	-0.0482041		2.05585	-50.3375	1.31218	-1.58263		2.92401	-111.454	-1.06948	-2.7214		1.765	-90.8408	-0.0259013	-1.76481		1.54348	154.557	-1.39377	0.663106
0.908362	10.3097	0.893696	0.162568		1.23813	-68.4166	0.455451	-1.15131		2.6799	-97.5964	-0.354265	-2.65638		1.17023	-61.011	0.567144	-1.02362		1.44637	113.992	-0.588115	1.32141
2.02898	10.456	1.99529	0.368221		2.7006	-17.6842	2.57298	-0.820362		2.6583	-86.4265	0.165688	-2.65313		1.74351	-110.549	-0.611999	-1.63257		1.33368	78.1035	0.274931	1.30503
2.40594	20.1236	2.25906	0.827756		0.403265	-27.5774	0.357449	-0.18669		2.75051	-120.198	-1.38348	-2.37724		1.71382	-152.652	-1.52227	-0.787315		2.04657	55.6535	1.15467	1.68973
1.3032	129.221	-0.824026	1.00961		1.43253	-12.3122	1.39959	-0.305471		2.3237	-106.247	-0.650111	-2.23091		0.778365	-122.389	-0.41694	-0.657276		2.59182	59.6521	1.30952	2.23667
1.2587	52.6912	0.762913	1.00115		2.78714	-127.935	-1.71346	-2.19823		1.9416	-56.833	1.06221	-1.62527		0.0277422	-41.8503	0.0206649	-0.0185092		2.64433	63.5101	1.17948	2.36671
1.548	101.385	-0.30558	1.51754		2.18323	-113.433	-0.868202	-2.00317		1.62389	-93.2068	-0.0908401	-1.62135		1.10007	-165.945	-1.06714	-0.267159		1.42056	-126.091	-0.836818	-1.14792
2.67979	41.74	1.99959	1.78408		3.36951	-162.239	-3.2089	-1.02788		1.69216	-118.576	-0.809402	-1.48603		1.36727	-66.1347	0.553182	-1.25037		1.85848	167.175	-1.81211	0.412545
3.27191	-96.7002	-0.381748	-3.24956		3.1268	-164.553	-3.01385	-0.832823		2.40677	-154.638	-2.17481	-1.03089		0.660622	-106.08	-0.18298	-0.634775		0.718154	99.3612	-0.116814	0.70859
3.538	-51.1113	2.22119	-2.75386		0.654529	-121.286	-0.339906	-0.55935		1.39553	-20.9178	1.30356	-0.498244		3.03587	-11.2267	2.97778	-0.591057		1.86629	134.356	-1.30475	1.33442
2.925	-118.95	-1.41583	-2.5595		1.78783	-174.137	-1.77847	-0.182628		2.18272	-175.121	-2.17481	-0.18564		0.416989	121.447	-0.217548	0.355742		2.49268	128.654	-1.55695	1.94662
3.98243	-35.1819	3.25495	-2.29457		2.1034	159.761	-1.97353	0.727645		0.746456	-175.728	-0.744382	-0.0556008		1.27262	24.5892	1.15721	0.529549		2.67208	-52.0937	1.64165	-2.10831
2.42361	-132.027	-1.62255	-1.80034		1.90144	146.382	-1.58342	1.05274		0.206547	83.8827	0.0220107	0.205371		2.681	14.9157	2.59066	0.690083		1.09085	147.802	-0.923083	0.58126
1.41594	-92.4097	-0.0595325	-1.41469		1.50661	126.793	-0.902338	1.20651		0.628028	-62.0127	0.294718	-0.554581		2.05315	23.0359	1.88943	0.803414		2.67285	-58.8304	1.3834	-2.28699
1.64872	-69.1018	0.588114	-1.54026		0.716183	-167.152	-0.698253	-0.159251		0.663332	-17.1623	0.633796	-0.195735		1.20626	-69.3181	0.426028	-1.12853		3.54836	-34.4274	2.92685	-2.00611
3.43627	-20.7222	3.21396	-1.21588		0.862958	5.44756	0.859061	0.0819247		0.952656	20.0138	0.895125	0.326043		0.600477	-121.969	-0.31793	-0.509405		0.697193	-93.438	-0.0418092	-0.695939
1.61026	-118.863	-0.777295	-1.41023		0.307033	73.331	0.0880699	0.294131		0.732931	124.053	-0.410407	0.607251		2.87502	-9.44213	2.83607	-0.471651		1.28552	-82.5591	0.16648	-1.27469
2.6694	-14.5474	2.58382	-0.670503		0.681104	38.4138	0.533675	0.423195		1.2671	46.0903	0.878763	0.912861		0.601142	125.803	-0.351671	0.487544		0.633584	-81.2107	0.0968126	-0.626143
0.657237	-152.361	-0.582237	-0.304894		1.39867	151.875	-1.23352	0.659327		2.03167	136.15	-1.46514	1.40749		1.20513	31.6547	1.02584	0.632452		0.695294	82.64	0.0890694	0.689566
3.45072	-1.75778	3.4491	-0.105848		1.19454	32.315	1.00953	0.638569		1.45868	100.224	-0.258913	1.43551		2.58206	18.1714	2.45329	0.805242		1.11709	-46.2992	0.771788	-0.807607
3.03651	-88.6635	0.070823	-3.03569		0.755484	80.0303	0.130795	0.744076		1.16029	-51.1414	0.72797	-0.903517		1.99671	26.7048	1.78372	0.897307		2.87929	-146.845	-2.41052	-1.57471
2.99429	-51.4066	1.8678	-2.34031		1.63328	109.594	-0.547721	1.53871		0.309834	-85.3557	0.0250869	-0.308816		1.20376	-42.0765	0.893494	-0.806668		2.11382	-137.739	-1.56441	-1.42156
2.98289	-42.2599	2.20764	-2.00598		1.75844	-45.4818	1.23291	-1.25382		2.57534	-14.0145	2.49868	-0.623664		0.703633	-153.52	-0.629812	-0.313745		3.33496	-174.559	-3.31994	-0.316231
3.37434	-31.9119	2.86435	-1.78373		0.411869	-20.8708	0.384845	-0.146733		0.135782	1.21715	0.135751	0.00288423		1.12839	-165.701	-1.09343	-0.278699		0.685185	157.65	-0.633714	0.260548
1.91949	-103.537	-0.449314	-1.86616		0.0175068	42.2536	0.0129581	0.0117718		0.553993	120.657	-0.282477	0.476565		2.08276	173.343	-2.06872	0.241457		1.24265	-38.1643	0.977021	-0.767853
1.32485	-62.8821	0.603896	-1.17921		1.01427	29.9367	0.878942	0.506164		1.85966	10.1944	1.8303	0.329137		3.47056	170.632	-3.42427	0.564929		0.835204	-100.959	-0.158779	-0.819972
3.76565	-18.1378	3.57854	-1.17226		0.455849	74.1153	0.124767	0.438442		2.52949	-131.456	-1.67462	-1.89578		1.38638	142.415	-1.09863	0.845613		0.0108798	17.1285	0.0103972	0.00320427
1.89169	-37.4754	1.50127	-1.15094		0.743543	57.2174	0.402593	0.62512		1.90025	-116.893	-0.859518	-1.69475		3.23437	159.673	-3.03295	1.12355		3.00175	6.96009	2.97963	0.363746
4.18053	-14.1823	4.05312	-1.02426		3.1868	-86.6847	0.184295	-3.18147		1.87306	178.415	-1.87234	0.0517952		1.46372	110.396	-0.510105	1.37196		1.0456	118.608	-0.500646	0.917948
0.810752	-27.0391	0.722134	-0.368567		3.14596	-95.6944	-0.312149	-3.13043		0.140598	36.116	0.113578	0.0828716		2.28308	102.02	-0.475447	2.23303		2.04576	31.2363	1.7492	1.06087
4.15027	-8.74209	4.10205	-0.630786		2.34548	-55.4865	1.32895	-1.93266		0.941571	33.6731	0.783589	0.522057		2.91623	113.129	-1.14548	2.68185		0.897343	-47.8026	0.602733	-0.664784
1.30636	3.2188	1.3043	0.0733508		1.73595	-68.9472	0.623603	-1.62007		1.40852	156.042	-1.28717	0.571951		4.62038	127.052	-2.78393	3.68749		1.13274	-13.9141	1.09951	-0.272388
3.71813	4.95706	3.70422	0.32128		2.02621	-42.399	1.49629	-1.36625		1.19761	46.1719	0.829343	0.863981		4.11522	119.293	-2.01347	3.58901		0.331952	151.753	-0.292423	0.157103
3.16256	10.3152	3.11145	0.566297		1.57376	-58.2308	0.828586	-1.33798		1.13577	100.856	-0.21392	1.11544		2.47258	-41.0727	1.86402	-1.62453		1.01741	132.8	-0.691266	0.746507
1.78516	-79.8424	0.314823	-1.75718		1.51192	-148.992	-1.29586	-0.778865		1.61379	-37.1832	1.28572	-0.975321		2.4535	-35.6353	1.99406	-1.42947		1.00711	78.6291	0.198561	0.987338
1.5713	-104.145	-0.383983	-1.52366		1.07335	-8.56167	1.06139	-0.159794		0.906761	-58.6054	0.472358	-0.774011		2.52458	-31.9347	2.14249	-1.33538		2.04531	33.3498	1.70851	1.12441
1.5118	-50.6882	0.957785	-1.16969		1.82892	-61.1221	0.883267	-1.6015		0.564848	-106.569	-0.161078	-0.541394		1.1751	-8.82505	1.16119	-0.180282		1.33125	96.3573	-0.147406	1.32306
1.33228	-24.0955	1.21619	-0.543914		2.1024	-37.542	1.66701	-1.28108		0.7007	-12.9019	0.68301	-0.156454		0.723847	-18.7706	0.685349	-0.232919		1.70681	-120.341	-0.862193	-1.47303
0.890717	-21.0838	0.831089	-0.32042		1.15068	-110.681	-0.406372	-1.07654		2.44927	-1.87508	2.44796	-0.0801415		1.12483	152.401	-0.996838	0.521118		2.25455	158.719	-2.10081	0.818281
0.981994	-170.726	-0.969159	-0.158255		0.102541	-99.121	-0.0162549	-0.101245		0.51933	138.786	-0.390667	0.342174		2.08122	22.3411	1.925	0.791111		0.94726	-85.5686	0.073191	-0.944429
0.204531	39.6678	0.157439	0.130559		0.959722	4.40037	0.956893	0.0736352		3.0131	14.0857	2.92251	0.73331		0.84649	66.0522	0.343594	0.77362		1.56596	-22.1992	1.44989	-0.591666
0.945284	15.8389	0.909394	0.257999		2.1946	0.751774	2.19441	0.0287944		0.753707	57.2012	0.408276	0.63355		1.45716	125.034	-0.83651	1.19313		1.58259	159.082	-1.47829	0.565043
1.4571	22.5001	1.34618	0.55761		2.47872	-43.0251	1.81208	-1.69128		0.958879	94.7785	-0.0798779	0.955546		1.20469	88.1776	0.038311	1.20408		0.531078	71.5022	0.168494	0.50364
1.52302	153.187	-1.35928	0.686999		1.50969	-59.5656	0.764735	-1.30167		1.80407	35.5575	1.46767	1.0491		2.51693	104.138	-0.614794	2.44069		1.65635	-129.618	-1.05619	-1.2759
0.757433	101.281	-0.148175	0.742798		1.12107	-73.8498	0.311832	-1.07682		2.84213	25.2895	2.56974	1.21413		2.53515	76.7355	0.581681	2.46752		2.4821	156.265	-2.27214	0.999079
1.86174	135.469	-1.32718	1.30562		0.649748	-90.4537	-0.00514543	-0.649727		2.34339	32.8839	1.96791	1.27231		3.02357	74.1096	0.827847	2.90804		2.4094	-46.8139	1.64892	-1.75678
1.47235	107.756	-0.449003	1.40221		0.687436	-33.8922	0.570632	-0.383336		1.71853	107.631	-0.520529	1.6378		3.33752	60.9511	1.62055	2.91768		1.69183	-53.2949	1.0112	-1.35638
1.76521	53.6262	1.04686	1.42129		2.22074	-3.08955	2.21752	-0.119691		1.7804	69.8478	0.613375	1.6714		3.69344	-69.9041	1.26904	-3.46858		1.27715	-87.4728	0.056314	-1.27591
2.41552	128.957	-1.51874	1.87835		0.384972	0.0696182	0.384972	0.000467766		3.12239	37.6065	2.47362	1.90539		3.22413	-42.7755	2.36657	-2.18959		2.31099	-26.8299	2.06221	-1.04305
2.07112	63.7186	0.917052	1.85703		0.263209	16.863	0.251892	0.076353		0.677368	174.456	-0.674199	0.0654398		3.37076	-29.7162	2.92748	-1.6709		1.05079	-104.821	-0.268784	-1.01583
1.92327	91.7545	-0.0588856	1.92237		3.19693	12.4344	3.12194	0.688365		0.586533	73.0255	0.171236	0.560981		3.33308	-17.6183	3.17674	-1.00884		1.52829	-7.4086	1.51553	-0.197065
3.57276	-75.5046	0.89427	-3.45903		2.93554	16.1488	2.81972	0.816471		1.4445	-57.0362	0.785964	-1.21195		1.01139	-150.498	-0.880245	-0.498069		2.53801	-3.50217	2.53327	-0.155038
3.63707	-50.8186	2.29782	-2.81927		1.74843	54.9855	1.00322	1.43198		1.86736	-26.7269	1.66786	-0.839826		2.83116	-2.04658	2.82935	-0.101106		0.726808	1.45103	0.726575	0.0184047
2.75588	-88.6346	0.0656687	-2.7551		1.83383	-103.416	-0.425495	-1.78378		1.13717	-46.2782	0.785964	-0.821837		2.45264	24.7388	2.22755	1.02639		0.731575	-171.704	-0.72392	-0.105555
2.94524	-69.8054	1.01673	-2.76419		1.30933	-55.3587	0.744273	-1.07722		2.01385	-16.7212	1.92869	-0.579414		3.2637	19.8875	3.06906	1.11023		0.150774	36.415	0.121333	0.0895038
4.16591	-39.2662	3.2253	-2.63671		1.01289	-103.778	-0.241222	-0.983745		0.348562	81.5903	0.0509772	0.344814		1.20313	79.1774	0.225911	1.18173		0.997051	142.305	-0.78894	0.60966
3.15707	-37.8721	2.49214	-1.93813		1.77428	-146.327	-1.47659	-0.983745		0.726002	59.5595	0.367825	0.625927		1.96472	53.5401	1.16756	1.58017		0.357271	98.7388	-0.0542805	0.353124
1.71489	-85.7013	0.128541	-1.71007		0.746341	-158.912	-0.696359	-0.268531		2.40503	22.7115	2.21855	0.928562		2.0044	71.5399	0.63468	1.90126		0.638794	104.167	-0.156345	0.619366
2.4597	-38.1259	1.93494	-1.5186		1.20677	169.157	-1.18523	0.227017		2.98455	30.0618	2.58309	1.49506		2.01076	148.827	-1.72042	1.04083		2.42809	21.3041	2.26217	0.882171
3.17291	-28.4122	2.79072	-1.50971		0.294491	-33.6306	0.245201	-0.1631		2.61946	39.1307	2.03194	1.65312		1.87592	-65.3413	0.782656	-1.70486		1.50975	117.513	-0.69742	1.33901
2.68941	-26.3744	2.40947	-1.19473		0.151268	-40.4202	0.115162	-0.0980803		1.9152	108.654	-0.612598	1.81459		1.62421	-130.129	-1.04681	-1.24187		0.374992	83.9075	0.0397992	0.372874
1.5921	-34.8779	1.30611	-0.910407		1.61353	3.31234	1.61083	0.093228		2.08013	67.979	0.779934	1.92837		0.529899	-48.3134	0.352412	-0.395725		0.887184	-134.962	-0.626914	-0.627753
3.13045	-68.097	1.16777	-2.90449		1.11383	7.56075	1.10415	0.146555		0.136901	-45.2269	0.0964195	-0.0971863		1.25947	-151.98	-1.11183	-0.591678		1.73558	-176.446	-1.73225	-0.107597
2.46821	-90.7787	-0.0335438	-2.46799		0.681475	130.408	-0.441747	0.518911		1.85493	162.322	-1.76734	0.563278		1.2939	4.95845	1.28906	0.111836		1.21706	-4.43047	1.21342	-0.0940167
3.20115	-55.1664	1.82848	-2.62755		0.867235	63.3486	0.389007	0.775093		0.913673	-60.9384	0.443817	-0.79864		1.17183	82.1003	0.161056	1.16071		0.900003	166.222	-0.874107	0.214341
2.50973	-76.3449	0.59249	-2.43879		2.29666	34.4626	1.89358	1.2996		1.18806	-32.9172	0.997322	-0.645622		1.34394	163.826	-1.29075	0.374359		3.44519	-58.0266	1.82432	-2.92254
3.23366	-45.3365	2.27307	-2.29993		1.47607	57.8388	0.785716	1.24957		0.79101	0.950728	0.790901	0.0131249		1.9529	138.257	-1.45713	1.30022		3.63677	-26.7476	3.24763	-1.63677
1.42028	-125.085	-0.816356	-1.16222		1.88238	129.024	-1.18523	1.46239		0.682012	147.597	-0.575821	0.365472		3.31756	126.654	-1.98053	2.66152		1.64164	-117.517	-0.758465	-1.45592
1.37555	-116.851	-0.621298	-1.22724		1.46325	81.5848	0.21414	1.44749		1.27977	161.568	-1.21412	0.404641		2.6841	99.6375	-0.449358	2.64622		1.5966	-38.5226	1.24912	-0.994398
3.1063	-24.0936	2.83568	-1.26808		2.02959	105.857	-0.554543	1.95236		0.756586	22.7684	0.69763	0.292804		3.38084	100.976	-0.643717	3.31899		0.839609	-126.413	-0.498387	-0.675687
2.90709	-1.03476	2.90661	-0.052499		2.47846	112.652	-0.954537	2.28728		1.42886	15.985	1.37361	0.393488		0.174444	9.71535	0.171942	0.0294381		1.07017	-146.936	-0.896874	-0.583858
0.56948	-167.639	-0.556278	-0.121912		2.54811	-32.2901	2.15406	-1.36121		1.59317	19.8398	1.49861	0.540709		1.95455	8.16981	1.93472	0.277756		2.93559	-165.925	-2.84746	-0.713897
2.27469	11.366	2.23008	0.448289		3.41868	-22.8372	3.15069	-1.32684		1.52978	134.39	-1.07014	1.09317		1.24807	24.6026	1.13476	0.519598		2.39317	-178.475	-2.39232	-0.0637015
0.456897	43.744	0.330079	0.315916		1.11293	-56.646	0.611899	-0.929615		2.05388	28.5015	1.80496	0.980075		4.0443	5.41533	4.02625	0.381679		0.628694	155.432	-0.571776	0.261396
2.57797	-40.8102	1.95121	-1.68485		2.77121	-18.341	2.63043	-0.872022		1.09304	76.0643	0.26324	1.06087		3.69233	8.024	3.65618	0.515405		2.10763	-71.9419	0.653324	-2.00381
1.79583	-44.7809	1.27469	-1.26498		0.812892	-92.3166	-0.0328588	-0.812228		1.73418	116.174	-0.764948	1.55635		3.39568	30.1803	2.93539	1.70709		1.59487	-79.8544	0.280938	-1.56993
2.92797	-26.7047	2.61566	-1.31581		2.24938	-23.2966	2.06599	-0.889611		1.69091	100.274	-0.301584	1.6638		3.94601	-99.0674	-0.621877	-3.8967		1.46161	-155.633	-1.33141	-0.603044
0.614281	-86.8978	0.0332427	-0.613381		3.06971	-10.257	3.02065	-0.546605		1.90985	62.0115	0.896282	1.68648		4.14144	-116.645	-1.85725	-3.70164		0.0564407	99.9301	-0.00973305	0.0555952
1.56978	-16.1932	1.50751	-0.437777		0.330791	-119.982	-0.165304	-0.286527		2.16773	-78.7309	0.423612	-2.12594		3.99605	-116.647	-1.79223	-3.5716		1.67351	143.261	-1.34111	1.00104
2.3915	-6.55829	2.37585	-0.273142		1.58783	19.93	1.49273	0.541247		2.10361	-101.563	-0.421642	-2.06092		3.33244	-101.718	-0.676828	-3.26298		2.96418	-167.22	-2.89075	-0.655701
0.518275	-33.8496	0.430429	-0.288687		1.24663	43.2349	0.908236	0.853933		1.56934	-19.5326	1.47903	-0.524699		3.41784	-116.18	-1.50793	-3.06721		0.339718	91.0162	-0.00602485	0.339664
0.222762	170.593	-0.219766	0.0364109		1.65124	174.589	-1.64388	0.155705		0.514185	-123.81	-0.28611	-0.427232		2.59646	-81.2744	0.393888	-2.56641		0.819638	152.698	-0.72833	0.375954
2.93236	12.7628	2.85991	0.647804		0.355339	121.322	-0.184722	0.303551		0.636534	14.4189	0.616484	0.158503		1.14016	-81.097	0.176455	-1.12643		1.89657	-102.449	-0.408848	-1.85198
2.21217	21.0587	2.06443	0.794887		1.23948	140.957	-0.962676	0.78075		0.179242	37.9621	0.141318	0.110259		0.625167	-28.7855	0.547914	-0.301037		0.177301	-55.9047	0.0993898	-0.146824
1.48167	102.863	-0.329854	1.44449		0.80611	83.6356	0.0893581	0.801142		0.863827	119.364	-0.423582	0.752845		2.60623	-164.174	-2.50744	-0.710743		0.935465	-148.659	-0.798965	-0.48657
1.51167	66.3706	0.605906	1.38493		2.26718	144.205	-1.83894	1.32606		2.94653	27.1641	2.62154	1.34521		1.53335	-177.737	-1.53215	-0.0605483		1.76109	-6.47101	1.74987	-0.198476
2.18933	-32.04	1.85585	-1.16146		2.53987	138.924	-1.91466	1.66883		2.34442	38.971	1.8227	1.47447		1.346	-14.2082	1.30483	-0.330371		0.547834	163.11	-0.524202	0.159167
2.79858	-27.5141	2.48205	-1.29285		1.8929	109.281	-0.625034	1.78673		1.52395	72.0615	0.46937	1.44987		0.220995	116.188	-0.0975293	0.198309		1.92188	-23.2346	1.76601	-0.758175
1.04771	-56.5452	0.577579	-0.874124		1.10156	-36.1877	0.889053	-0.650396		2.70981	48.5639	1.79331	2.03153		1.07833	145.274	-0.886264	0.614273		0.621974	-53.2372	0.372253	-0.498276
1.16195	-32.3647	0.981446	-0.621997		0.820402	-174.076	-0.81602	-0.0846766		2.20819	106.996	-0.645464	2.11175		0.654254	82.9042	0.0808187	0.649243		3.34332	-55.5101	1.89319	-2.75565
0.512742	-76.25	0.121871	-0.498048		0.496788	10.1849	0.48896	0.0878443		2.83298	57.6628	1.51536	2.39362		1.35773	114.29	-0.558508	1.23754		1.78248	-77.6947	0.379884	-1.74153
0.859629	6.29741	0.854442	0.0942922		1.86534	18.2619	1.77139	0.584524		0.904049	-16.761	0.865641	-0.26071		2.12202	37.7286	1.67835	1.29851		2.20949	-57.8302	1.1764	-1.87027
2.48586	3.1726	2.48205	0.137578		0.489846	54.7032	0.283039	0.399798		0.854975	148.738	-0.730837	0.443689		2.87108	51.4567	1.78898	2.24558		3.85163	-15.5172	3.71124	-1.03042
0.963379	136.942	-0.703907	0.657734		1.12019	50.1084	0.718418	0.859474		2.2386	146.349	-1.86347	1.2405		0.775606	131.82	-0.51717	0.578013		1.18811	-133.72	-0.821138	-0.858685
1.36655	37.837	1.07925	0.838268		2.17848	29.9508	1.88755	1.08762		2.46938	111.838	-0.918549	2.29218		1.01305	78.645	0.199456	0.993218		2.39363	-14.8148	2.31406	-0.61204
2.99102	29.8906	2.59315	1.49056		1.9386	46.6961	1.32962	1.41077		1.29863	141.112	-1.01082	0.815282		2.34543	-70.3506	0.788683	-2.20885		1.81611	-17.9786	1.72743	-0.560565
2.40572	47.0487	1.6392	1.76083		1.87564	58.3609	0.983898	1.59686		3.71206	-62.9283	1.68937	-3.30536		2.10246	-89.5403	0.016867	-2.10239		0.705806	-18.78	0.66823	-0.227224
2.0583	98.5459	-0.305868	2.03545		1.72171	94.7493	-0.14255	1.7158		2.14224	-101.935	-0.443008	-2.09593		2.9272	-45.9392	2.03564	-2.1035		1.45546	4.20875	1.45153	0.106817
2.27245	65.2699	0.950668	2.06404		2.26637	129.151	-1.43091	1.75753		1.97163	-123.674	-1.0932	-1.6408		2.42467	-26.1803	2.17592	-1.06976		0.26843	105.706	-0.072664	0.258407
2.49309	79.5031	0.454196	2.45137		2.20055	50.9744	1.38561	1.70953		1.99694	-40.6897	1.51418	-1.30193		1.21667	-98.0676	-0.170749	-1.20463		0.77239	46.045	0.536111	0.556032
2.39154	-120.374	-1.20927	-2.06329		2.17659	62.5728	1.00258	1.93194		0.979238	-58.9113	0.505644	-0.838589		0.911883	-47.8508	0.611932	-0.67607		3.18949	-101.718	-0.647761	-3.12302
1.82759	-81.9723	0.255227	-1.80968		2.47274	55.5272	1.3996	2.03851		0.618634	-30.6987	0.531941	-0.315828		2.69141	-4.40803	2.68345	-0.206859		2.79277	-113.781	-1.12617	-2.55564
3.43507	-144.046	-2.78064	-2.01687		2.59003	72.1229	0.795081	2.46498		2.61769	-12.0709	2.55982	-0.547419		2.91571	-52.6199	1.77013	-2.3169		1.3675	-87.421	0.0615338	-1.36611
3.91486	-155.447	-3.56087	-1.62675		3.15788	70.0028	1.07991	2.96749		0.701964	-144.721	-0.573047	-0.405427		1.53222	-49.5034	0.995027	-1.16517		1.23294	-179.903	-1.23294	-0.00208619
1.20222	-56.5731	0.662272	-1.00336		3.31042	61.9174	1.55836	2.92068		0.163293	-4.22627	0.162849	-0.012034		1.38583	-60.0829	0.691179	-1.20117		0.380151	26.3713	0.340591	0.168858
3.90005	-168.441	-3.82095	-0.781501		1.72673	-55.7861	0.970911	-1.42791		1.55258	168.686	-1.52241	0.3046		0.65063	-33.8584	0.540294	-0.362494		2.34964	-150.413	-2.04326	-1.16013
0.273379	-37.5239	0.216817	-0.166513		0.250739	-83.3379	0.0290894	-0.249046		0.623132	151.604	-0.54816	0.296334		1.04081	-163.77	-0.999328	-0.290893		0.680011	-101.747	-0.138447	-0.665768
3.3008	178.894	-3.30018	0.063741		0.673687	-35.5377	0.548202	-0.391573		2.31577	-96.6572	-0.268463	-2.30015		1.71573	-84.1384	0.175222	-1.70676		2.50342	-166.686	-2.43613	-0.576524
1.03585	154.698	-0.93648	0.442707		0.829004	7.931	0.821075	0.114386		2.42754	-109.492	-0.810016	-2.28841		2.72304	-24.2693	2.48239	-1.11924		0.831802	-167.05	-0.810646	-0.186407
2.81728	-34.5784	2.31961	-1.5989		2.12201	3.80945	2.11732	0.140983		1.87394	-70.666	0.620413	-1.76826		0.97552	-57.5546	0.523362	-0.823244		0.671688	156.417	-0.615588	0.26873
1.79129	-28.93	1.56775	-0.866518		2.45099	18.411	2.32554	0.774099		1.46278	-65.7636	0.600476	-1.33385		1.10289	-24.0832	1.00689	-0.450047		2.99245	169.858	-2.94569	0.526912
0.759159	-19.736	0.714565	-0.256358		1.37587	38.8914	1.07089	0.863835		1.87302	-41.8578	1.39503	-1.24983		1.42051	-30.193	1.2278	-0.714396		2.23017	142.426	-1.76756	1.35992
2.14562	7.37432	2.12787	0.275392		3.46029	15.811	3.32937	0.942809		1.89425	-155.253	-1.72029	-0.792965		2.06755	0.513068	2.06747	0.0185141		1.79962	171.193	-1.7784	0.275539
3.36152	-31.7756	2.85769	-1.77016		2.78168	-29.7483	2.41509	-1.38024		0.90955	-17.4374	0.867751	-0.272559		2.85666	20.4397	2.6768	0.997605		3.13683	166.649	-3.05206	0.724331
2.70357	-40.6178	2.0522	-1.76005		1.82394	-41.4864	1.36633	-1.20825		0.879727	-147.871	-0.744996	-0.467868		2.64826	133.93	-1.8373	1.90726		2.58641	152.711	-2.29856	1.18581
1.26467	-102.453	-0.272721	-1.23492		2.97643	-14.1292	2.88639	-0.726577		0.265505	-55.7179	0.14955	-0.21938		2.42777	54.1573	1.42161	1.96802		0.27883	-138.524	-0.208909	-0.184671
1.04537	-58.487	0.546408	-0.891202		1.59255	-30.9124	1.36633	-0.818136		1.20672	7.09111	1.19749	0.148967		2.38148	111.365	-0.867596	2.21782		0.417018	68.7312	0.151271	0.388614
1.73968	-31.1497	1.48885	-0.899896		0.903876	-49.5767	0.5861	-0.688097		0.690047	-15.3259	0.665508	-0.182386		3.47273	130.434	-2.2523	2.6433		1.38393	142.137	-1.09258	0.849427
3.12608	-12.3434	3.05382	-0.668265		1.16429	-11.2623	1.14187	-0.227386		0.244862	-157.682	-0.22652	-0.0929849		2.65251	91.5617	-0.07229	2.65153		0.970587	39.814	0.745534	0.621465
1.84942	-7.15581	1.83501	-0.230379		0.980555	5.0568	0.976739	0.0864294		0.628401	22.3962	0.581001	0.239426		1.33934	39.1905	1.03805	0.846329		1.02096	61.4646	0.487713	0.896932
0.425998	-142.45	-0.33774	-0.259626		1.14909	-97.5585	-0.151149	-1.13911		1.0614	43.0704	0.775369	0.724826		1.01234	96.3046	-0.111169	1.00622		1.44342	111.693	-0.53353	1.34119
0.133981	-27.6421	0.118689	-0.0621601		1.83774	-130.416	-1.19146	-1.39919		2.43284	150.245	-2.11209	1.20741		1.18789	68.6101	0.433239	1.10607		2.36578	129.5	-1.50482	1.8255
3.18399	6.74301	3.16197	0.373852		0.689891	-126.589	-0.411227	-0.553932		1.95941	132.226	-1.31684	1.45094		0.71069	-75.9815	0.172154	-0.689524		3.01691	53.9388	1.7759	2.43884
1.36105	28.8388	1.19226	0.6565		1.64956	-176.566	-1.6466	-0.0987959		1.20782	68.4068	0.444494	1.12305		2.23667	-175.153	-2.22867	-0.188978		2.72895	101.024	-0.521809	2.67859
0.853814	64.0045	0.374227	0.767433		1.41635	-94.3944	-0.108522	-1.41219		2.44356	-145.453	-2.01266	-1.38571		1.09128	162.624	-1.04147	0.325907		1.99673	-149.207	-1.71523	-1.02221
2.31511	26.715	2.06798	1.04076		1.67095	-33.9705	1.38576	-0.933668		1.17546	-43.7411	0.849239	-0.812717		0.873511	31.7011	0.743184	0.45902		2.591	-164.392	-2.49546	-0.69711
2.95322	-56.7964	1.61723	-2.47105		1.24379	-45.7662	0.867652	-0.891173		0.660209	-42.5818	0.48612	-0.446725		2.30577	163.592	-2.21186	0.651326		0.801095	-157.467	-0.739938	-0.306993
2.53708	-60.3647	1.25453	-2.2052		0.903788	-155.703	-0.823736	-0.371874		1.16759	-179.004	-1.16741	-0.0203002		1.16703	133.157	-0.798243	0.851335		1.41104	-170.126	-1.39013	-0.241974
3.71657	-24.5924	3.37944	-1.54669		1.0977	15.7086	1.0567	0.297197		0.525006	19.7658	0.494074	0.177545		1.99105	-122.457	-1.06852	-1.68005		1.96803	166.086	-1.91029	0.473241
1.48993	-78.9916	0.284507	-1.46251		0.217692	73.5492	0.0616489	0.208781		0.508195	53.9742	0.298895	0.411004		2.73613	-148.863	-2.34195	-1.4148		0.582011	131.238	-0.383652	0.437662
3.76801	-14.9883	3.63982	-0.974489		0.675481	106.635	-0.193367	0.647212		0.949654	123.193	-0.519903	0.794697		0.767259	-81.8082	0.109324	-0.75943		2.27093	154.74	-2.05378	0.969067
3.04714	-14.9276	2.94431	-0.784939		1.43461	32.5988	1.20861	0.772903		4.91607	-43.0547	3.59218	-3.35619		0.656419	-119.813	-0.326348	-0.569546		1.5133	140.265	-1.16375	0.967357
0.839939	-88.0941	0.0279343	-0.839474		2.47876	-66.6623	0.981959	-2.27596		4.93767	-23.7822	4.51839	-1.99117		3.43521	169.927	-3.38226	0.600805		1.13628	81.8436	0.161209	1.12478
1.21381	-174.124	-1.20744	-0.12426		1.88607	-90.9207	-0.0303079	-1.88582		2.93985	-42.5891	2.16439	-1.9895		0.551637	80.8079	0.0881209	0.544553		2.58719	-62.2634	1.2041	-2.28991
1.34476	25.3275	1.2155	0.575277		1.91662	-33.1801	1.60412	-1.04891		2.38512	-60.3646	1.17939	-2.07312		2.23775	-99.2596	-0.360072	-2.20859		1.79875	-128.012	-1.10771	-1.41721
2.55343	11.3135	2.50381	0.500925		0.977161	-53.753	0.577763	-0.788056		3.67403	-31.6468	3.1277	-1.9277		1.7447	-63.5276	0.77773	-1.56177		1.36039	-82.1572	0.185632	-1.34766
3.0926	15.4276	2.98116	0.822695		1.52578	-33.6523	1.27008	-0.845513		1.50345	-92.9086	-0.0762896	-1.50152		2.15822	-138.43	-1.61467	-1.43204		2.04415	-139.086	-1.54475	-1.33877
1.17959	53.3583	0.703988	0.94648		0.62891	-61.0501	0.30442	-0.550324		3.01708	-23.2242	2.7726	-1.18973		1.22554	-51.9647	0.755111	-0.96527		2.60719	-24.7264	2.36815	-1.09055
1.18055	91.6263	-0.0335052	1.18008		0.465266	-101.823	-0.0953274	-0.455396		3.96543	-15.0561	3.8293	-1.03008		2.87776	-164.585	-2.77424	-0.764923		2.29015	-9.34474	2.25976	-0.371862
1.07406	-134.595	-0.754092	-0.764817		0.210048	-10.2831	0.206675	-0.037496		0.648411	-38.7862	0.505429	-0.406176		1.61393	-173.606	-1.60388	-0.179747		2.69615	-126.336	-1.59751	-2.1719
1.04326	-166.437	-1.01417	-0.244661		1.10762	148.124	-0.940581	0.584917		0.924109	162.366	-0.880686	0.279946		0.984599	-165.606	-0.953689	-0.244767		2.5467	-139.271	-1.92991	-1.66167
0.558193	-8.09009	0.552638	-0.0785545		1.07896	133.706	-0.745522	0.779975		1.36883	99.68	-0.230162	1.34934		1.00453	-147.292	-0.845254	-0.542803		0.797224	-128.794	-0.49948	-0.621358
1.39718	23.6267	1.28007	0.559959		1.7145	-102.224	-0.363024	-1.67563		2.69938	138.361	-2.01736	1.79357		0.834644	-117.866	-0.390117	-0.737862		2.61509	-170.618	-2.5801	-0.426299
2.10486	28.5192	1.84945	1.00497		1.34474	-63.401	0.602098	-1.20242		3.24903	137.044	-2.37789	2.21402		0.261062	-175.023	-0.260078	-0.0226472		2.32031	-179.107	-2.32003	-0.0361824
0.926059	84.7427	0.084854	0.922163		1.27969	-123.071	-0.698292	-1.07238		2.04405	107.127	-0.601968	1.9534		0.0226472	33.5412	0.0188762	0.0125134		1.80687	174.956	-1.79987	0.158876
1.96398	114.362	-0.810157	1.7891		1.51451	-30.4397	1.30575	-0.767298		3.14544	124.039	-1.7607	2.60648		2.96946	-92.6486	-0.137218	-2.96629		2.6251	169.376	-2.5801	0.483974
3.3407	50.0311	2.14597	2.56029		1.49077	-12.7581	1.45396	-0.329215		3.02395	113.619	-1.21155	2.77063		2.71918	-104.117	-0.663199	-2.63707		0.896138	-141.292	-0.699291	-0.560406
3.035	79.1892	0.569261	2.98113		1.05454	-12.1244	1.03102	-0.221491		3.07977	176.593	-3.07433	0.182999		2.49839	-58.4883	1.30584	-2.12996		0.132791	-20.8774	0.124073	-0.0473225
1.92912	171.641	-1.90862	0.280461		2.94237	-29.0307	2.57269	-1.42787		1.75877	154.095	-1.58205	0.768363		2.31865	-71.6415	0.730287	-2.20064		1.02469	174.991	-1.02077	0.089472
1.38373	156.91	-1.27288	0.542663		1.97806	-39.3123	1.53043	-1.25319		3.47377	146.075	-2.88244	1.93871		3.51378	-36.8356	2.81229	-2.10658		2.0726	164.757	-1.99968	0.544925
2.67693	164.003	-2.57327	0.737721		1.75702	-29.4205	1.53043	-0.863076		1.25927	-79.4795	0.229927	-1.23811		2.1676	-118.726	-1.0418	-1.90083		1.91795	150.822	-1.67458	0.935042
1.41946	96.2987	-0.155733	1.41089		1.04888	-44.3371	0.7502	-0.733037		1.47391	-39.1642	1.14278	-0.930841		1.07785	-85.6307	0.0821161	-1.07472		1.01066	79.425	0.185478	0.993492
2.46348	145.552	-2.03148	1.3935		1.33425	-11.6687	1.30667	-0.269854		0.7504	-116.961	-0.340218	-0.668844		1.9245	-66.82	0.757522	-1.76914		2.68424	137.299	-1.97266	1.82038
2.8663	141.66	-2.24817	1.77803		1.14129	2.24236	1.14042	0.044655		0.301488	-41.1024	0.227182	-0.1982		2.15106	-137.011	-1.57347	-1.46671		1.96399	114.978	-0.82933	1.7803
0.223146	114.844	-0.0937538	0.202495		2.80429	-87.9117	0.102186	-2.80243		0.679417	17.8254	0.646801	0.207981		1.62888	-38.8485	1.26858	-1.02174		3.19626	-104.634	-0.80754	-3.09257
2.26926	159.855	-2.13044	0.781517		2.5314	-50.6583	1.60477	-1.95773		0.514505	57.4074	0.277144	0.433482		0.402995	-119.931	-0.201075	-0.349247		2.86984	-124.009	-1.60517	-2.37895
1.46487	83.2161	0.173038	1.45461		1.54398	-160.03	-1.45115	-0.527301		1.05518	128.83	-0.661607	0.821996		2.02441	-4.20411	2.01896	-0.148409		1.83172	-62.5802	0.843522	-1.62594
2.03284	125.341	-1.17588	1.65823		0.592683	-92.0035	-0.0207205	-0.592321		1.42447	127.694	-0.870974	1.12717		0.799681	-172.722	-0.793238	-0.101305		1.05161	-59.6156	0.531903	-0.907174
2.77364	122.31	-1.48249	2.34421		1.21633	-16.4587	1.16649	-0.344618		1.4079	47.6856	0.947794	1.04109		2.21801	-96.9487	-0.268334	-2.20172		0.728997	-98.2853	-0.10505	-0.721388
2.84029	99.8629	-0.486514	2.79831		0.670954	-179.39	-0.670916	-0.007145		1.60761	88.2213	0.0498987	1.60684		2.37858	-42.8572	1.74362	-1.61784		1.00973	-14.8435	0.976038	-0.258674
2.82858	85.0827	0.242461	2.81817		3.08117	-157.894	-2.85467	-1.15951		2.43505	113.099	-0.955338	2.23982		1.50783	-112.659	-0.580892	-1.39145		0.32702	-22.2945	0.302574	-0.124061
0.633999	31.087	0.542947	0.327358		1.2382	-117.879	-0.578983	-1.0945		2.29952	72.2281	0.701879	2.18979		1.80982	-33.0938	1.51623	-0.988185		3.52939	-76.2582	0.838395	-3.42836
1.53105	148.952	-1.3117	0.789657		3.50703	-160.693	-3.3098	-1.15951		2.58454	-37.6859	2.04534	-1.58001		1.25384	-139.626	-0.955212	-0.812214		3.27212	-60.8887	1.59191	-2.85878
1.49706	124.532	-0.848641	1.23328		0.658773	-151.508	-0.578983	-0.314261		1.8357	-41.8574	1.36724	-1.22492		0.665708	-103.664	-0.15726	-0.646867		2.43207	-105.138	-0.635126	-2.34768
2.03387	120.788	-1.04106	1.74724		3.31195	-177.937	-3.3098	-0.119202		1.15769	-89.7565	0.00492079	-1.15768		1.36986	-4.46085	1.36571	-0.106544		2.82321	-42.2622	2.08938	-1.89868
3.00345	134.174	-2.09291	2.15417		0.290351	150.975	-0.253886	0.140876		1.42497	-15.7286	1.37162	-0.386283		2.13891	-27.7727	1.89252	-0.996659		1.06264	-89.2667	0.0135999	-1.06256
2.38813	63.1051	1.08028	2.12982		1.13203	166.154	-1.09914	0.270915		0.819766	-141.889	-0.645004	-0.50595		1.64619	10.8837	1.61658	0.310827		1.09619	-21.837	1.01754	-0.407749
3.7569	107.357	-1.12079	3.58582		0.534241	84.8561	0.0478985	0.53209		0.206596	-2.7825	0.206352	-0.0100291		2.87951	23.4937	2.64081	1.14791		1.3325	-119.482	-0.655794	-1.15996
0.180482	67.019	0.0704648	0.166158		2.58762	154.447	-2.33451	1.11617		2.02594	5.55708	2.01642	0.196186		2.33419	34.3403	1.92734	1.31673		1.1719	-3.11712	1.17017	-0.0637248
1.3253	145.308	-1.08969	0.754312		3.31117	-78.8061	0.6428	-3.24818		0.506293	94.689	-0.0413884	0.504598		1.03494	-67.921	0.389019	-0.959045		0.576952	81.6133	0.0841507	0.570782
1.85869	29.0115	1.62546	0.901437		2.33554	-63.3475	1.04767	-2.08737		0.383034	38.9142	0.298034	0.240605		0.335289	-105.626	-0.0903097	-0.322898		1.75061	30.6794	1.50558	0.893219
1.02125	110.154	-0.35187	0.958719		2.58624	-47.8911	1.73418	-1.91866		2.12748	118.134	-1.0032	1.87611		1.42315	-12.6723	1.38848	-0.312202		1.49887	-100.359	-0.269523	-1.47444
2.08295	139.642	-1.58724	1.34884		1.85131	-38.0704	1.45745	-1.14157		1.99879	78.0071	0.415329	1.95516		0.46873	106.038	-0.129496	0.450487		1.22662	-71.7936	0.383246	-1.16521
1.64895	56.1433	0.91866	1.36935		1.25218	-42.876	0.917634	-0.852001		2.55488	107.442	-0.765817	2.4374		1.52834	21.3712	1.42325	0.556941		1.91859	-29.9645	1.66214	-0.958269
1.86245	121.535	-0.974093	1.58741		0.530726	-165.064	-0.512795	-0.136786		2.17773	-12.9647	2.12222	-0.488577		2.32904	-0.857065	2.32878	-0.034838		1.28811	-137.621	-0.95153	-0.868232
1.76102	106.866	-0.51094	1.68527		0.692644	-30.5687	0.59638	-0.352259		0.0764577	104.913	-0.0196765	0.0738824		1.98668	4.08436	1.98163	0.141501		0.903913	-25.4246	0.81637	-0.38807
1.67645	88.74	0.0368631	1.67604		1.22337	164.113	-1.17664	0.334885		1.38969	-48.1116	0.927873	-1.03455		1.4389	155.356	-1.30785	0.599981		1.17669	130.782	-0.768593	0.890991
1.94535	116.632	-0.872026	1.73895		0.725782	31.8429	0.61655	0.382917		1.02608	-117.556	-0.474684	-0.909677		1.47333	50.1391	0.944299	1.13094		0.847193	-55.6861	0.477586	-0.699749
2.51262	126.408	-1.49134	2.02218		0.674995	42.7378	0.495762	0.458082		0.389802	-13.6563	0.378782	-0.0920312		1.74113	77.4872	0.377228	1.69977		1.45027	-159.085	-1.35471	-0.517724
2.49611	54.5662	1.44715	2.03379		0.673917	90.4973	-0.00584862	0.673891		2.23283	163.862	-2.14484	0.62061		0.0400418	-2.07285	0.0400156	-0.00144832		0.452831	-88.6458	0.0107015	-0.452704
2.32437	103.609	-0.546929	2.25911		1.41726	138.454	-1.06071	0.93996		0.760504	78.054	0.157416	0.744034		0.684568	122.738	-0.370209	0.575829		1.40002	-6.71445	1.39042	-0.163692
3.10159	46.7319	2.12587	2.25844		1.12243	110.681	-0.396409	1.0501		1.71383	52.4268	1.04505	1.35834		0.430883	28.9072	0.377196	0.208286		1.41724	155.505	-1.28969	0.587608
2.56722	71.9697	0.794608	2.44116		1.14363	77.1787	0.253786	1.11512		2.29126	122.396	-1.22758	1.93466		0.977755	72.2354	0.29832	0.931133		1.86793	50.0073	1.2005	1.43107
2.5213	84.0124	0.263006	2.50755		1.94235	134.927	-1.3717	1.3752		0.930818	33.2225	0.778676	0.509987		1.27695	120.717	-0.652258	1.0978		1.58618	76.5844	0.368016	1.5429
3.10034	100.714	-0.576358	3.04629		1.51848	60.6298	0.744739	1.32331		0.970485	59.4463	0.493343	0.835736		2.46114	32.1155	2.08453	1.30841		2.51763	68.264	0.932355	2.33863
3.0678	96.4667	-0.345514	3.04828		1.64763	96.7536	-0.19376	1.63619		1.65151	48.7192	1.08958	1.24109		2.59087	85.4667	0.204777	2.58276		0.347606	166.674	-0.338248	0.0801177
3.61831	55.4309	2.05303	2.97947		1.94029	70.6184	0.643903	1.83033		0.403457	-170.414	-0.397823	-0.0671868		2.0775	-135.664	-1.48594	-1.45189		1.66158	161.911	-1.57946	0.515923
3.24604	72.601	0.970645	3.09752		1.6376	-138.931	-1.23461	-1.07585		0.967589	-0.106806	0.967587	-0.0018037		1.18938	169.947	-1.17112	0.20761		2.46454	162.763	-2.35385	0.730313
3.54981	107.284	-1.05466	3.38952		1.51659	-144.496	-1.23461	-0.880787		0.983001	168.898	-0.964605	0.189282		3.58076	168.301	-3.50637	0.726096		1.81031	77.3277	0.397135	1.76621
3.51125	77.6088	0.753461	3.42946		0.520614	-176.086	-0.5194	-0.0355339		0.267968	81.5962	0.039163	0.265091		0.990988	127.852	-0.608087	0.782488		2.36982	-75.6856	0.585922	-2.29625
4.16098	61.7323	1.9706	3.66476		2.0823	-177.232	-2.07987	-0.100553		0.840313	67.1636	0.326126	0.774446		2.14692	152.508	-1.90449	0.991062		2.30177	-124.997	-1.32014	-1.88557
0.672724	-32.4083	0.567948	-0.360547		1.32632	158.569	-1.23461	0.484622		1.21053	68.4593	0.444463	1.12599		1.90716	88.7001	0.0432661	1.90667		0.841198	-161.99	-0.799983	-0.260078
1.19928	-149.333	-1.03155	-0.611688		2.10587	-71.0598	0.683527	-1.99186		2.01738	97.8832	-0.276692	1.99831		2.05706	104.004	-0.497803	1.99592		2.07987	-12.9839	2.0267	-0.4673
0.602988	-105.483	-0.160968	-0.581106		1.7996	-117.773	-0.838565	-1.59229		2.21443	-141.114	-1.7237	-1.39017		0.723007	-49.4867	0.469683	-0.54967		0.927725	-10.1863	0.913102	-0.164067
1.3855	-25.2307	1.25332	-0.590587		1.70593	-32.9021	1.4323	-0.926667		2.30106	-161.242	-2.17883	-0.739971		0.218586	98.8455	-0.0336122	0.215986		0.673092	-174.457	-0.669944	-0.0650195
0.117347	-5.83419	0.116739	-0.0119283		2.32579	-153.733	-2.08563	-1.02931		0.966931	-60.7632	0.472269	-0.843752		1.77976	164.086	-1.71155	0.488001		1.69088	11.4226	1.65739	0.334868
1.50308	3.46176	1.50034	0.0907596		1.42634	-150.415	-1.24037	-0.704211		0.676774	-115.679	-0.293268	-0.609932		2.40331	-123.121	-1.31317	-2.01283		3.23974	-103.173	-0.738291	-3.15449
1.9129	169.067	-1.87818	0.362788		0.341893	-113.265	-0.135041	-0.314094		0.610834	-76.5139	0.142453	-0.593991		1.8046	-130.967	-1.18313	-1.36263		2.88891	-122.109	-1.53555	-2.44701
1.04356	41.7112	0.779024	0.694359		1.36148	-4.56628	1.35716	-0.108391		2.76412	179.165	-2.76383	0.0402605		2.94857	-155.29	-2.67858	-1.23259		1.91946	-61.7546	0.908383	-1.69091
2.10386	151.66	-1.8517	0.998701		1.31571	19.791	1.238	0.445488		0.748128	14.0246	0.725828	0.1813		1.50587	-145.982	-1.24815	-0.842475		1.13683	-58.5813	0.592613	-0.970145
1.08043	77.5161	0.233552	1.05489		1.98285	-96.5582	-0.226466	-1.96987		1.48375	153.725	-1.33045	0.656814		2.50435	-172.605	-2.48352	-0.322319		0.775401	-92.7947	-0.0378067	-0.774479
2.35623	31.1013	2.01754	1.21712		1.86485	-61.2611	0.896659	-1.63514		1.01825	127.659	-0.622108	0.806116		0.192704	-74.8009	0.0505219	-0.185964		1.09113	-17.042	1.04322	-0.319781
2.24459	44.4508	1.60231	1.57188		2.50554	-125.693	-1.46184	-2.03489		2.53367	159.543	-2.37389	0.885517		0.511743	-32.4265	0.431952	-0.274405		0.422339	-26.2128	0.378906	-0.18655
1.86769	89.794	0.0067153	1.86768		2.1434	-119.189	-1.04531	-1.87123		0.890946	95.8989	-0.0915651	0.886228		1.06076	-173.11	-1.05309	-0.12726		1.76886	-124.293	-0.996619	-1.46138
2.5335	109.796	-0.858025	2.38379		1.77606	-117.193	-0.811642	-1.57975		2.09379	124.814	-1.19537	1.71903		2.36279	165.591	-2.28846	0.587954		0.87708	-156.05	-0.80156	-0.356047
2.94888	66.7928	1.16203	2.71028		2.07606	-127.603	-1.26678	-1.64477		2.65072	-56.0527	1.48024	-2.19891		1.71866	-12.9576	1.6749	-0.385375		2.13232	148.259	-1.81339	1.12178
3.27034	57.763	1.74448	2.76622		1.83476	-139.58	-1.39682	-1.18964		1.67355	-48.5326	1.10821	-1.25404		0.463066	141.173	-0.360749	0.290327		1.1396	85.5581	0.0882592	1.13618
4.00351	-47.2671	2.71671	-2.94068		1.64542	-133.697	-1.13674	-1.18964		1.76702	-40.7925	1.33778	-1.15444		3.321	-62.5721	1.52976	-2.94769		2.0808	111.359	-0.757844	1.93789
3.45749	-54.5723	2.00422	-2.81733		1.09896	-105.381	-0.291486	-1.0596		1.44621	-42.8224	1.06075	-0.983033		2.53758	-64.2369	1.10296	-2.28534		1.66252	-82.3107	0.222447	-1.64757
3.10689	-58.957	1.60217	-2.66193		0.634633	-108.689	-0.203359	-0.601169		0.369763	161.695	-0.351052	0.116135		3.49002	-32.3788	2.94741	-1.86895		0.944172	-157.475	-0.872146	-0.361692
2.29223	-55.9228	1.28436	-1.89861		0.527581	141.961	-0.415515	0.325098		1.09528	36.0641	0.885382	0.644784		2.01256	-62.0345	0.943769	-1.77755		2.50835	-174.701	-2.49763	-0.231653
3.30375	-35.2535	2.69786	-1.90691		1.40804	107.814	-0.430754	1.34053		1.21515	-91.2761	-0.0270612	-1.21485		2.9366	-16.4703	2.81611	-0.832583		0.109445	44.2245	0.07843	0.0763351
1.71055	-76.0427	0.412582	-1.66004		1.96267	39.796	1.50797	1.25622		1.39621	-60.4705	0.688153	-1.21485		1.69885	-38.9773	1.32067	-1.06859		3.64106	-112.577	-1.39788	-3.36203
2.8634	-37.7765	2.26325	-1.75407		1.82072	88.9421	0.0336156	1.82041		1.5977	-20.7334	1.49423	-0.565618		2.39531	-31.7435	2.037	-1.26022		3.3288	-90.784	-0.0455504	-3.32848
3.2165	-17.8516	3.06164	-0.986029		2.11022	72.7776	0.624797	2.0156		0.292591	-33.418	0.244219	-0.161143		3.14354	-10.4525	3.09138	-0.5703		2.91228	-79.5937	0.526037	-2.86438
1.78002	-20.9808	1.662	-0.637344		2.46329	61.5267	1.17437	2.16533		1.22985	161.071	-1.16334	0.398956		0.616119	-26.2044	0.552798	-0.272063		2.9504	-109.976	-1.00796	-2.77288
1.11676	-2.38455	1.1158	-0.0464643		3.29647	42.1928	2.44232	2.214		1.83989	13.8898	1.7861	0.441675		1.04195	153.173	-0.929805	0.470236		2.51167	-46.8533	1.71765	-1.83253
0.0366097	-8.70222	0.0361883	-0.00553902		2.88916	49.7694	1.86601	2.20573		0.777062	46.754	0.532391	0.566026		1.22447	80.8858	0.19396	1.20901		2.70773	-135.495	-1.93112	-1.89806
1.14162	-175.992	-1.13883	-0.0797967		2.41408	104.562	-0.606951	2.33653		0.908128	125.266	-0.524331	0.741467		1.95168	99.6213	-0.326196	1.92423		1.88142	-64.8459	0.799703	-1.703
2.09588	167.871	-2.0491	0.440359		3.22134	55.4491	1.82694	2.65316		0.671088	-102.627	-0.1467	-0.654858		2.41095	77.2173	0.533434	2.3512		3.02281	-148.643	-2.58131	-1.57296
0.438429	50.9979	0.275924	0.340713		3.5144	78.2879	0.713402	3.44123		0.684633	176.066	-0.68302	0.0469766		1.71566	-42.7091	1.26068	-1.16369		1.38328	-108.358	-0.435667	-1.31288
1.67216	162.408	-1.59396	0.505379		3.84257	71.9014	1.1937	3.65245		0.359013	14.9113	0.346924	0.0923827		1.07877	-53.978	0.634419	-0.872498		2.24238	-31.8362	1.90503	-1.18284
2.38144	154.798	-2.15475	1.01406		0.673849	-86.1447	0.045307	-0.672324		0.993165	161.985	-0.944476	0.307149		0.813356	-10.2105	0.800475	-0.14418		1.05881	-141.253	-0.825784	-0.662685
0.896051	88.4373	0.0244356	0.895717		0.0146203	45.3809	0.0102692	0.0104066		1.67726	167.361	-1.63662	0.366995		0.0334028	59.014	0.0171968	0.028636		0.907453	-18.6946	0.859577	-0.29086
2.09521	148.634	-1.78902	1.09055		1.00462	165.705	-0.973517	0.24806		1.19114	145.367	-0.98008	0.676949		3.23932	-109.771	-1.09572	-3.04838		1.32213	2.07492	1.32127	0.0478695
1.72295	137.539	-1.27109	1.16313		0.510936	59.4808	0.259467	0.440151		1.02136	72.837	0.301396	0.975881		3.21701	-117.508	-1.48584	-2.85332		1.51258	-32.2136	1.27975	-0.806325
1.95044	71.1851	0.62904	1.84621		1.47125	25.5588	1.32728	0.634753		1.39186	128.965	-0.875268	1.08221		2.57926	-101.417	-0.510544	-2.52822		1.01779	-14.2807	0.986337	-0.25106
2.17604	105.735	-0.590106	2.0945		1.23239	148.624	-1.05218	0.641652		1.31577	93.532	-0.0810595	1.31327		2.07658	-93.3246	-0.120427	-2.07309		1.94765	-19.2779	1.83844	-0.643018
5.04768	-66.4134	2.01976	-4.62598		1.98023	136.748	-1.44229	1.35687		0.101331	4.01129	0.101083	0.00708841		0.441528	0.438535	0.441515	0.00337937		0.57306	-103.192	-0.130779	-0.557938
4.37604	-76.6092	1.01346	-4.25707		1.53312	58.556	0.799772	1.30798		1.26387	7.88624	1.25192	0.173411		1.16719	-173.975	-1.16074	-0.122501		1.81696	0.335031	1.81693	0.0106244
3.76815	-72.2569	1.14834	-3.58891		2.85787	129.927	-1.83421	2.1916		0.872242	4.59927	0.869433	0.0699418		2.59132	-115.82	-1.12864	-2.33262		1.58312	17.6051	1.50897	0.478822
4.21714	-56.9477	2.30005	-3.53469		2.99919	-107.775	-0.915611	-2.85601		1.33684	97.0918	-0.165046	1.32661		2.21313	-72.0082	0.683592	-2.10491		1.83331	84.4497	0.177316	1.82472
4.75558	-44.6647	3.38233	-3.34297		2.66439	-88.7458	0.0583199	-2.66375		1.90705	81.3536	0.286699	1.88538		1.77423	-70.8272	0.582687	-1.67582		1.10968	-125.813	-0.649328	-0.89987
3.2114	-88.8137	0.0664858	-3.21071		2.62669	-67.7587	0.994226	-2.43126		1.687	-167.32	-1.64585	-0.370312		2.23649	-144.307	-1.81637	-1.30486		1.65548	-149.715	-1.42956	-0.83485
3.93094	-47.1438	2.67367	-2.88163		2.29814	-70.6437	0.761698	-2.16824		0.766017	-151.091	-0.67056	-0.370312		0.924939	-128.914	-0.581	-0.719688		1.36175	-155.034	-1.2345	-0.574772
4.63525	-31.9983	3.93099	-2.45619		2.49084	-50.2169	1.59385	-1.91415		2.18742	-171.977	-2.16601	-0.305293		0.697256	-35.0831	0.570578	-0.400757		0.79021	-10.057	0.778068	-0.137992
3.42223	-44.5047	2.44071	-2.39887		2.67377	-139.099	-2.02094	-1.75067		3.14136	177.269	-3.1378	0.149677		1.00651	-164.761	-0.971117	-0.264552		0.0754276	4.54376	0.0751905	0.00597541
2.75843	-60.6296	1.35288	-2.40388		1.93134	-132.487	-1.30448	-1.42422		1.90782	177.452	-1.90593	0.0848243		0.584146	174.051	-0.581	0.0605457		1.21666	163.993	-1.16948	0.335501
2.48438	-72.1746	0.760512	-2.36511		0.842855	-103.412	-0.1955	-0.819868		0.48744	63.2653	0.219279	0.435332		1.44142	-124.963	-0.826008	-1.18127		0.765462	25.331	0.691864	0.327501
2.03474	-77.4712	0.441396	-1.98628		1.40835	-146.595	-1.17569	-0.775382		0.899198	108.049	-0.278604	0.854949		1.45082	-139.412	-1.10176	-0.943938		1.43921	36.6765	1.15427	0.859635
2.11308	-48.7222	1.39402	-1.58802		1.24369	-28.9836	1.08793	-0.602642		3.58264	159.745	-3.36109	1.24031		0.672152	-22.797	0.619645	-0.260437		1.58039	108.293	-0.496034	1.50052
1.74342	-116.897	-0.788715	-1.55481		0.450316	-90.6791	-0.00533742	-0.450284		2.39179	148.346	-2.03597	1.25518		1.31968	-2.7523	1.31816	-0.0633688		0.456987	-93.8458	-0.0306505	-0.455958
2.11934	-137.757	-1.56895	-1.42478		0.705078	-146.879	-0.590513	-0.385265		3.3179	148.36	-2.82472	1.74052		1.37391	152.271	-1.21612	0.639272		1.40841	-5.193	1.40263	-0.127476
1.48741	-55.7663	0.836773	-1.22972		0.785586	179.646	-0.785571	0.0048522		2.86304	143.318	-2.29605	1.71031		0.539324	98.1952	-0.0768783	0.533817		0.485886	9.73537	0.478889	0.0821623
0.833601	-129.358	-0.528637	-0.644541		0.46959	18.8751	0.444338	0.151915		2.42087	131.807	-1.6138	1.80451		0.0867111	-25.4852	0.0782738	-0.0373099		0.5827	121.169	-0.301582	0.498586
1.3225	-171.766	-1.30887	-0.189405		2.38324	-106.109	-0.661273	-2.28966		0.585817	-26.1223	0.52598	-0.257928		0.864538	-0.0664877	0.864538	-0.00100324		1.02212	27.6149	0.905681	0.473779
1.30572	-7.58718	1.29429	-0.1724		1.81976	-77.1797	0.403793	-1.77439		0.983558	8.49769	0.97276	0.14534		0.518869	77.8846	0.108901	0.507313		2.1918	-107.719	-0.667059	-2.08782
0.224239	1.02303	0.224203	0.00400362		1.46668	-114.981	-0.619396	-1.32948		0.913716	167.632	-0.892511	0.195708		1.138	58.7111	0.591026	0.97249		2.02111	-61.8902	0.952273	-1.78271
1.92147	-94.3943	-0.147224	-1.91582		2.48659	-154.528	-2.24488	-1.0694		0.765294	28.0629	0.67532	0.360026		2.76721	-104.041	-0.671388	-2.68452		1.61994	-57.5164	0.870003	-1.36649
1.61866	-139.756	-1.23551	-1.04573		0.970383	-62.7425	0.444426	-0.862629		1.39017	127.119	-0.838936	1.10849		2.22949	-87.2049	0.108721	-2.22684		1.62626	-137.698	-1.20279	-1.09454
1.87859	-161.09	-1.7772	-0.608819		1.546	-171.664	-1.52967	-0.224146		1.95737	101.142	-0.378239	1.92048		1.88245	-70.4797	0.629002	-1.77425		0.509021	-48.1394	0.33968	-0.379103
0.630898	-6.14454	0.627274	-0.0675295		1.40327	175.875	-1.39963	0.100951		2.46589	-66.8913	0.967806	-2.26803		2.20601	-38.1246	1.7354	-1.36193		1.1687	-159.891	-1.09746	-0.4018
0.618699	31.0845	0.529857	0.319436		1.50492	-34.8149	1.23554	-0.859197		1.41318	-52.9691	0.851084	-1.12816		1.20491	-66.0638	0.488855	-1.10128		0.972495	-24.0063	0.888375	-0.395647
0.32074	109.372	-0.106387	0.302582		1.71621	-26.2617	1.53907	-0.759374		0.253992	117.897	-0.11884	0.224475		0.749905	-114.742	-0.313856	-0.681067		0.73271	13.3318	0.712965	0.168955
1.16051	136.537	-0.842328	0.798297		1.95303	-6.62629	1.93998	-0.225365		0.108626	48.1692	0.0724464	0.0809392		0.410306	-32.6869	0.345327	-0.221585		2.28662	4.2312	2.28039	0.16871
1.02793	91.0247	-0.0183827	1.02776		1.41325	-3.89371	1.40999	-0.0959678		0.604488	-82.388	0.0800734	-0.599161		0.611552	-44.8904	0.433259	-0.431605		0.978538	144.718	-0.798798	0.565207
1.2307	57.3334	0.664268	1.03603		0.110621	6.84982	0.109832	0.0131935		0.955736	-3.95885	0.953455	-0.065984		1.43695	14.7279	1.38974	0.365315		1.42447	14.1296	1.38138	0.347736
1.93555	129.281	-1.22546	1.49821		1.13	175.641	-1.12673	0.0858799		0.43435	15.697	0.418152	0.117514		2.01019	123.482	-1.10898	1.67661		1.58775	-66.9763	0.620986	-1.46127
2.02192	95.8317	-0.205441	2.01146		1.04544	137.441	-0.770053	0.707075		1.34296	13.0456	1.3083	0.303142		1.669	89.2234	0.0226199	1.66885		1.64655	-124.841	-0.940668	-1.3514
0.768673	-130.277	-0.496935	-0.586442		0.552135	43.6626	0.399424	0.3812		0.826529	139.472	-0.628235	0.537095		2.11801	100.841	-0.398353	2.08021		0.991814	-47.7238	0.667199	-0.733854
0.719304	-164.161	-0.691993	-0.196325		1.29612	38.6266	1.01257	0.809094		1.39931	61.0966	0.676335	1.22501		2.7325	113.973	-1.11024	2.49678		0.798706	-106.396	-0.225454	-0.766226
1.00711	-6.63645	1.00036	-0.116391		1.68754	133.567	-1.16306	1.22273		1.35077	81.2661	0.20511	1.33511		0.126834	45.6434	0.0886727	0.0906867		1.42439	-147.457	-1.20075	-0.766226
1.1489	173.595	-1.14173	0.128166		1.59623	71.7926	0.498754	1.51631		2.25718	132.255	-1.51781	1.67066		1.18115	157.977	-1.09496	0.442905		1.85828	-157.831	-1.7209	-0.701206
0.576901	23.6792	0.52833	0.231692		0.571841	-57.8029	0.304696	-0.483904		2.13574	47.4999	1.44289	1.57463		1.70652	133.8	-1.18116	1.2317		0.423595	-173.083	-0.420512	-0.0510112
2.33156	10.9219	2.28933	0.441762		1.14777	-168.755	-1.12573	-0.223826		2.18134	118.836	-1.05207	1.91086		1.52236	109.592	-0.510473	1.43422		0.650105	146.715	-0.543455	0.356781
1.8898	160.148	-1.77749	0.641766		0.0959799	-102.272	-0.0204012	-0.0937866		2.03016	63.7428	0.898145	1.82069		1.22058	0.268835	1.22057	0.00572702		1.47655	23.714	1.35187	0.593826
1.29641	144.251	-1.05215	0.757402		3.63868	5.40975	3.62247	0.343047		2.75834	109.427	-0.917425	2.6013		0.487184	130.625	-0.317211	0.369764		1.69996	153.469	-1.52095	0.759336
3.35374	18.2957	3.1842	1.05281		2.15913	155.904	-1.97099	0.881506		1.72879	-139.178	-1.30825	-1.13012		1.08358	-144.922	-0.886768	-0.622722		1.2218	63.6146	0.542975	1.09452
3.48106	32.8919	2.92303	1.89041		1.28766	125.043	-0.739368	1.05423		2.33576	162.886	-2.23234	0.687349		1.53194	26.0965	1.37576	0.673875		1.61632	120.118	-0.811052	1.3981
2.62768	54.8259	1.51371	2.14788		3.05577	21.8856	2.83554	1.13905		1.25631	96.1736	-0.135104	1.24903		1.18644	47.3564	0.803739	0.872727		0.643325	-46.6247	0.441819	-0.467615
2.7993	123.309	-1.53725	2.33944		1.04971	105.498	-0.280479	1.01154		2.9486	146.294	-2.45292	1.63629		2.16819	38.5804	1.69495	1.35211		1.62263	13.6555	1.57676	0.383075
2.54362	63.5917	1.13131	2.27818		2.01732	133.447	-1.38727	1.4646		0.557186	155.967	-0.508886	0.226918		1.52046	100.754	-0.283704	1.49375		1.7337	40.7051	1.31428	1.13066
4.08931	37.5258	3.24315	2.49087		1.4344	76.4297	0.336563	1.39435		2.02244	112.434	-0.771794	1.86939		1.74123	79.3175	0.322765	1.71105		1.82671	127.217	-1.10486	1.45471
3.55577	46.803	2.43396	2.59217		2.48641	140.045	-1.90597	1.59672		2.24843	-112.158	-0.848031	-2.08238		2.04369	57.0571	1.11137	1.7151		1.98112	73.0316	0.57818	1.89488
2.71937	76.1411	0.651374	2.64021		1.6731	67.309	0.645417	1.5436		1.70056	-67.1333	0.66082	-1.56692		0.758662	-172.42	-0.752033	-0.100075		3.50487	-139.603	-2.6692	-2.27144
2.79985	92.1392	-0.104513	2.7979		3.37244	28.9214	2.95184	1.63095		1.38509	-144.029	-1.12097	-0.813567		1.45905	9.94797	1.43711	0.252057		1.35393	-159.772	-1.27042	-0.46814
1.95934	-139.063	-1.48015	-1.28382		1.8524	111.224	-0.670596	1.72676		0.164118	-84.2273	0.0165075	-0.163286		0.873415	36.597	0.70122	0.520715		2.32682	-173.26	-2.31074	-0.273082
1.21964	-132.882	-0.829955	-0.893699		2.52703	54.2882	1.47505	2.05186		1.39954	170.676	-1.38105	0.226745		0.922163	123.486	-0.508785	0.769105		2.46974	171.217	-2.44078	0.377113
2.78846	-166.866	-2.71552	-0.633621		2.34164	-64.3445	1.01384	-2.11079		0.407909	37.4949	0.323638	0.248291		0.746087	73.5988	0.210666	0.715728		1.4029	128.865	-0.880308	1.09233
1.6285	-171.4	-1.61019	-0.243504		2.53752	-50.6774	1.60799	-1.963		3.59059	150.345	-3.12029	1.77655		0.783801	-75.74	0.193068	-0.75965		2.80033	148.036	-2.37576	1.48244
1.11039	165.759	-1.07626	0.273157		2.11754	-104.96	-0.546633	-2.04577		3.16404	128.045	-1.94994	2.49177		0.896003	-168.312	-0.877425	-0.181513		3.2865	144.344	-2.6704	1.91574
1.74639	141.274	-1.36244	1.09254		2.20184	-24.5994	2.002	-0.916564		0.746853	-32.629	0.628985	-0.402701		0.434073	-145.392	-0.357269	-0.246532		2.59457	131.687	-1.72556	1.93758
1.70141	113.932	-0.690191	1.55513		1.7055	-22.2378	1.57864	-0.645447		0.908438	-80.3953	0.151573	-0.895704		1.80529	-1.39517	1.80475	-0.0439549		2.75749	-26.7896	2.46152	-1.24284
0.510802	-57.2737	0.276153	-0.429718		2.1107	-10.8917	2.07267	-0.398824		0.342641	-21.8849	0.317948	-0.127717		1.42478	17.0492	1.36216	0.417735		0.729595	-50.8639	0.460495	-0.565909
0.412109	-10.6977	0.404947	-0.0764985		2.31442	-0.746753	2.31423	-0.0301637		0.889333	175.628	-0.886745	0.0678024		1.72264	164.212	-1.65766	0.468682		2.61074	-10.254	2.56904	-0.464744
0.490301	104.236	-0.120577	0.475244		2.13959	10.4056	2.1044	0.386442		0.808237	22.8191	0.744979	0.313452		1.68799	43.3007	1.22846	1.15767		2.0064	-3.6828	2.00226	-0.128877
1.41336	122.739	-0.764371	1.18883		1.9943	-115.509	-0.858862	-1.79988		1.36657	113.868	-0.552953	1.24971		0.683486	-156.38	-0.626227	-0.273847		0.84727	-0.443228	0.847245	-0.00655424
1.28258	66.736	0.506579	1.1783		1.8698	-69.3829	0.658397	-1.75005		0.178374	106.017	-0.049217	0.17145		0.0276414	13.641	0.0268617	0.00651885		3.6969	0.891796	3.69645	0.0575391
1.90441	-77.3325	0.417625	-1.85806		1.7408	-94.7333	-0.143648	-1.73486		1.83525	155.693	-1.67256	0.755446		0.759279	53.7736	0.448717	0.612501		0.921289	176.419	-0.91949	0.057546
0.922102	-21.8245	0.856012	-0.342806		1.43699	-66.9727	0.562106	-1.32248		1.05998	90.1595	-0.00295154	1.05997		1.16871	134.646	-0.821286	0.831485		2.20288	-48.0081	1.47378	-1.63727
0.520985	-145.166	-0.427628	-0.297589		1.23155	-63.5657	0.548252	-1.10279		2.28203	120.986	-1.17484	1.95638		1.15683	85.6003	0.0887443	1.15342		2.49526	-29.4436	2.17297	-1.22659
0.822963	173.544	-0.817745	0.0925278		1.77458	-36.2031	1.43196	-1.04816		2.28398	77.3699	0.499404	2.22871		2.10541	134.81	-1.48382	1.49367		2.70789	-12.2229	2.64651	-0.573303
0.491434	-3.16812	0.490683	-0.0271596		0.891092	-79.9096	0.15612	-0.877309		2.51735	100.953	-0.478285	2.47149		1.6684	101.068	-0.320291	1.63736		2.446	3.99902	2.44004	0.170582
1.20818	9.99503	1.18984	0.209694		1.75176	-149.48	-1.50906	-0.889608		0.0170758	90	1.04559e-18	0.0170758		1.97649	61.9044	0.930817	1.74359		0.718538	160.058	-0.675453	0.245074
0.605832	135.588	-0.432759	0.423972		0.976932	-108.375	-0.307971	-0.92712		1.00258	46.7074	0.687493	0.729738		3.53304	117.671	-1.64071	3.12897		1.37155	23.3666	1.25906	0.543973
0.555426	70.0357	0.189642	0.522047		0.837007	-99.8821	-0.143648	-0.824588		2.2554	66.6448	0.89411	2.0706		3.09043	78.236	0.630077	3.02551		1.12159	41.412	0.841164	0.741898
1.63052	-44.5846	1.16128	-1.14457		2.16898	-164.914	-2.09423	-0.56451		2.20895	94.6685	-0.179786	2.20162		1.42509	-126.634	-0.850353	-1.14358		1.64868	36.117	1.33183	0.971794
0.814213	-107.604	-0.246244	-0.776084		0.519736	-84.7963	0.0471381	-0.517594		2.10603	-167.314	-2.05462	-0.462487		0.36338	-80.6355	0.0591272	-0.358537		1.49015	80.2256	0.252982	1.46852
0.148546	-34.8753	0.121867	-0.0849374		0.859645	-53.8961	0.506547	-0.694549		2.46168	155.951	-2.248	1.0032		0.952153	-153.263	-0.850353	-0.428364		2.27791	-130.381	-1.47577	-1.73522
1.37716	168.938	-1.35158	0.264228		1.84432	-13.585	1.79272	-0.433208		0.827782	113.487	-0.329909	0.7592		2.82674	-59.3169	1.44245	-2.431		1.35654	-135	-0.959218	-0.959218
1.4537	19.9523	1.36645	0.496058		1.55666	-6.43238	1.54686	-0.174393		1.089	-152.398	-0.96505	-0.504569		2.98974	-57.1732	1.62074	-2.51232		1.68651	-162.609	-1.60941	-0.504081
0.858731	55.8641	0.481884	0.710779		0.798454	173.84	-0.793843	0.0856846		0.817849	160.302	-0.769991	0.275665		2.39696	-96.3431	-0.264822	-2.38228		0.0227334	-28.359	0.0200051	-0.0107982
1.51072	131.152	-0.994151	1.13751		1.31416	179.099	-1.314	0.0206651		0.434102	34.2696	0.35874	0.244437		2.22097	-107.151	-0.654939	-2.1222		2.42392	167.352	-2.36511	0.530725
4.52215	-116.264	-2.00108	-4.0553		1.03755	48.2243	0.691231	0.77376		1.04053	-130.384	-0.674169	-0.792584		2.70134	-47.4824	1.82561	-1.99108		3.09701	163.852	-2.97482	0.861329
2.66351	-116.673	-1.19563	-2.38007		1.54556	-113.119	-0.606849	-1.42144		0.640272	-148.194	-0.54413	-0.337448		1.48426	-76.4745	0.347137	-1.4431		1.24418	146.124	-1.03297	0.693503
2.52136	-91.4362	-0.0631965	-2.52057		1.80577	-131.309	-1.19202	-1.35642		0.258337	-102.469	-0.0557761	-0.252244		1.7775	-43.1821	1.29613	-1.21638		2.79335	146.586	-2.33163	1.53827
3.07188	-134.338	-2.1469	-2.1971		2.05357	-143.331	-1.64716	-1.22638		0.741062	166.116	-0.719412	0.17782		1.77095	-69.7402	0.613241	-1.66139		2.85058	-178.827	-2.84998	-0.0583445
2.38014	-133.014	-1.62366	-1.74034		2.14377	-149.242	-1.84222	-1.09635		2.7416	-79.987	0.476684	-2.69984		2.16776	-29.403	1.88853	-1.06426		1.34918	160.296	-1.27018	0.454889
2.02268	-60.0044	1.0112	-1.75177		1.40338	-143.424	-1.127	-0.836267		2.13919	-74.9723	0.554663	-2.06603		0.575834	171.751	-0.569877	0.082613		1.74311	157.862	-1.61461	0.65687
1.24797	-72.1922	0.38166	-1.18818		2.37297	-155.97	-2.16732	-0.966306		2.47494	-55.9979	1.38404	-2.05177		0.115221	34.1758	0.0953246	0.0647236		3.27927	152.738	-2.915	1.50212
2.03104	-143.075	-1.62366	-1.22018		1.90968	-149.602	-1.64716	-0.966306		2.55662	-44.411	1.8263	-1.78913		2.90508	9.93144	2.86155	0.501038		3.49457	142.302	-2.76505	2.13693
1.69828	-39.9342	1.30221	-1.09014		0.772465	-86.7832	0.0433463	-0.771248		3.13932	-36.9331	2.50938	-1.88637		0.620604	114.887	-0.261173	0.562973		2.08733	84.9863	0.182421	2.07934
1.94023	-154.671	-1.7537	-0.830062		1.11461	-131.385	-0.736888	-0.836267		1.50189	-65.4585	0.623814	-1.36621		2.55437	27.3228	2.26939	1.17246		3.82555	138.905	-2.88303	2.51455
0.954159	-132.806	-0.648372	-0.700023		0.932156	-116.216	-0.41179	-0.836267		0.809724	-126.489	-0.481517	-0.650994		1.79195	51.0504	1.12649	1.3936		1.63673	-24.9195	1.48435	-0.689629
1.25542	-29.5018	1.09264	-0.618233		0.505853	-50.4491	0.322108	-0.390042		0.778881	-10.2887	0.766357	-0.139114		2.45902	-129.404	-1.56096	-1.90006		2.51221	-16.6145	2.40733	-0.718318
0.534464	1.3347	0.534319	0.0124492		1.502	-157.442	-1.38708	-0.576189		1.30316	-165.518	-1.26175	-0.325897		1.68559	-80.6023	0.275235	-1.66297		0.122733	-117.331	-0.0563502	-0.109033
1.8715	-136.494	-1.35741	-1.28839		2.22678	-166.729	-2.16732	-0.51117		1.79968	-109.191	-0.591588	-1.69967		1.23143	-82.6092	0.158406	-1.2212		1.77738	0.558663	1.77729	0.0173301
2.72195	-151.749	-2.39772	-1.28839		0.684245	-152.485	-0.606849	-0.316111		2.4349	-43.1995	1.77498	-1.66679		2.39756	-159.55	-2.24646	-0.837701		1.2754	14.8096	1.23303	0.326003
3.23808	-160.266	-3.04791	-1.09333		0.500937	-30.0824	0.433463	-0.251092		1.80557	-135.059	-1.27804	-1.27543		1.04214	-165.977	-1.01109	-0.252525		0.517897	55.5683	0.292831	0.427162
1.28165	-107.346	-0.382115	-1.22337		1.52194	-175.438	-1.51712	-0.121053		1.84124	-87.6565	0.0752879	-1.8397		0.0945476	1.9287	0.094494	0.00318208		1.12748	38.7004	0.879913	0.704952
1.18123	-112.243	-0.447134	-1.09333		0.0708421	17.7827	0.0674574	0.0216357		2.50461	-41.1092	1.88712	-1.64677		1.41578	171.772	-1.4012	0.202611		1.41344	53.3272	0.84417	1.13367
2.78249	-168.112	-2.72282	-0.573172		1.02581	-6.77711	1.01864	-0.121053		1.40065	-67.6875	0.53177	-1.29578		1.14051	152.439	-1.01109	0.527709		1.60039	100.099	-0.280638	1.57559
2.67017	-166.172	-2.59278	-0.638191		1.51893	177.207	-1.51712	0.0740059		1.1269	-109.695	-0.379787	-1.06097		0.544116	-158.453	-0.506091	-0.199835		2.96285	-165.908	-2.87369	-0.721374
0.576001	-95.6809	-0.0570171	-0.573172		0.459571	153.641	-0.41179	0.204045		1.76803	-21.8964	1.64049	-0.659353		0.214915	-57.6273	0.115071	-0.181514		0.96248	-0.366688	0.96246	-0.00615974
0.513372	-70.492	0.171435	-0.483902		0.670495	121.993	-0.355238	0.568655		0.313875	-63.4349	0.140369	-0.280738		2.27043	-174.95	-2.26162	-0.199835		0.265585	92.3041	-0.0106775	0.26537
0.0582669	111.871	-0.0217054	0.0540732		2.24241	146.878	-1.87804	1.2253		0.467576	-132.314	-0.314767	-0.345758		1.61255	173.266	-1.60142	0.189101		2.98043	153.645	-2.67066	1.32309
3.56846	-179.149	-3.56807	-0.0530159		2.17683	151.182	-1.90724	1.0493		1.64274	-0.624352	1.64265	-0.0179006		2.95132	153.96	-2.65173	1.29561		3.12102	-77.9838	0.649757	-3.05263
2.22831	171.299	-2.20266	0.337101		1.79154	144.148	-1.4521	1.0493		1.36982	30.4668	1.18068	0.694554		1.39484	117.263	-0.638932	1.2399		2.60478	-82.8756	0.323056	-2.58467
3.2975	169.566	-3.24297	0.597179		1.41183	127.883	-0.866927	1.11432		1.19013	53.9135	0.700992	0.961776		2.69598	-52.4839	1.64181	-2.1384		2.44043	-111.287	-0.885973	-2.27393
2.67601	165.673	-2.59278	0.662199		2.70098	151.002	-2.36238	1.30938		0.760029	-81.0132	0.118721	-0.750699		2.1247	-62.6444	0.976324	-1.88709		2.97441	-58.3665	1.56003	-2.53248
1.48294	148.492	-1.2643	0.77502		3.52803	-47.7584	2.37175	-2.61186		1.95104	0.613931	1.95093	0.0209052		1.40654	-22.7609	1.29701	-0.544169		3.06673	-33.3467	2.56182	-1.68579
0.831374	107.65	-0.252076	0.792238		1.86356	-94.6987	-0.152654	-1.8573		0.950671	18.49	0.901596	0.301494		2.31222	-17.4567	2.20573	-0.693633		2.21226	-124.648	-1.25774	-1.81994
0.792278	81.4875	0.117278	0.78355		2.21818	-46.9843	1.51324	-1.62186		0.661444	113.154	-0.260078	0.608167		1.34297	-167.155	-1.30936	-0.298567		2.77607	-19.5956	2.61529	-0.931037
2.52801	153.77	-2.26768	1.11734		3.02138	-38.3361	2.36993	-1.87408		1.52846	28.2408	1.34652	0.723235		0.840825	-87.437	0.0375995	-0.839984		2.34281	-19.2926	2.21124	-0.774046
2.93595	154.858	-2.6578	1.24737		2.43681	-34.2673	2.01383	-1.37206		1.74407	99.0607	-0.274658	1.7223		0.758963	9.32845	0.748926	0.123023		0.581892	-77.4438	0.126502	-0.567975
1.47688	101.879	-0.30401	1.44525		1.40751	-51.3402	0.879264	-1.09908		2.05603	-135.681	-1.47102	-1.43644		2.18623	173.042	-2.17013	0.264863		1.71133	169.01	-1.67995	0.326245
1.75186	109.967	-0.598237	1.64655		2.58739	-29.4498	2.25307	-1.27212		1.61075	-155.959	-1.47102	-0.656208		0.979925	-125.583	-0.5702	-0.796947		1.36466	-150.207	-1.18428	-0.678061
1.66526	-92.7845	-0.0808964	-1.66329		3.04673	-13.9231	2.95722	-0.733104		1.84764	-50.7413	1.16923	-1.43062		0.679727	-74.622	0.180254	-0.655391		0.761275	-24.7311	0.691452	-0.318487
1.67535	-145.535	-1.38129	-0.948075		1.15789	-60.9318	0.56256	-1.01204		1.22757	-139.259	-0.930086	-0.801163		0.949707	-23.339	0.871999	-0.376245		2.02973	177.118	-2.02716	0.102054
2.2495	-163.922	-2.16152	-0.622978		1.05078	-105.607	-0.282694	-1.01204		0.671416	-82.1663	0.0915132	-0.665151		0.577071	-177.465	-0.576506	-0.0255262		0.121906	-130.365	-0.0789523	-0.092885
0.667144	-176.752	-0.666072	-0.037802		0.557365	-92.3255	-0.0226155	-0.556906		0.698995	-34.0744	0.578985	-0.391625		0.986835	26.6883	0.8817	0.443224		1.20257	111.229	-0.435452	1.12097
1.6418	-178.681	-1.64136	-0.037802		0.633751	-61.4915	0.302482	-0.556906		1.34978	-167.984	-1.3202	-0.281007		0.767349	76.0239	0.185328	0.744633		1.71948	47.4724	1.16228	1.26718
1.97274	175.428	-1.96646	0.157256		0.669023	-17.0125	0.639747	-0.195743		2.25751	-0.48925	2.25742	-0.0192767		1.28179	114.333	-0.528147	1.16792		2.50842	87.4162	0.113081	2.50587
0.731463	103.591	-0.171892	0.71098		1.96163	-10.2905	1.93008	-0.350426		0.711409	160.357	-0.670008	0.239149		2.60462	173.659	-2.58868	0.287687		2.48878	-53.4108	1.4835	-1.99831
1.24176	58.8097	0.643087	1.06227		2.65333	-6.25484	2.63753	-0.289083		1.60628	10.4803	1.57948	0.292178		1.37864	143.221	-1.10423	0.825427		2.06238	-64.2955	0.894515	-1.85829
1.59367	130.182	-1.02827	1.21756		0.764423	-7.65065	0.757619	-0.10177		0.699929	15.3426	0.674984	0.185194		1.4466	42.388	1.06845	0.97522		2.57641	-25.0433	2.33419	-1.0906
2.88236	149.621	-2.48662	1.45765		2.96751	-51.0389	1.86595	-2.30746		1.89266	27.7534	1.67493	0.881349		1.9772	59.1112	1.01504	1.69677		1.36274	-25.6851	1.22809	-0.590645
2.20485	78.5713	0.436889	2.16114		1.63671	-92.1732	-0.0620641	-1.63554		0.879545	118.104	-0.414333	0.77584		2.17828	111.812	-0.809368	2.02233		2.07176	-7.10768	2.05584	-0.256349
1.21755	-58.6713	0.633061	-1.04003		1.57536	-46.8047	1.07831	-1.14847		3.05737	-64.4498	1.31865	-2.75838		2.80531	125.18	-1.61628	2.2929		0.0552031	-66.755	0.0217866	-0.050722
1.07151	-36.2116	0.864537	-0.633014		0.893115	-106.732	-0.257123	-0.855302		2.5318	-61.5278	1.20699	-2.22557		3.42375	130.86	-2.23988	2.5894		2.84729	-85.0353	0.24641	-2.8366
1.7717	0.33529	1.77167	0.0103678		1.327	-69.8054	0.458092	-1.24542		2.42129	-35.6473	1.96759	-1.41111		2.63289	83.2606	0.308979	2.61469		2.50989	-54.8115	1.44637	-2.05124
0.602902	-5.05608	0.600557	-0.0531342		0.422416	-127.495	-0.257123	-0.335146		1.03474	-45.8954	0.720146	-0.743013		1.45627	-55.9124	0.816179	-1.20605		1.80625	-90.3835	-0.0120894	-1.80621
0.993654	3.71092	0.991571	0.0643118		1.82887	-2.2006	1.82753	-0.0702257		2.12242	-20.0299	1.99404	-0.72695		0.855447	-144.191	-0.693744	-0.500508		1.21253	-126.683	-0.724355	-0.972384
2.69494	9.88094	2.65496	0.462455		2.85961	-146.706	-2.39024	-1.56976		0.0270616	41.1302	0.0203833	0.0178004		0.599212	-30.5893	0.515824	-0.304927		0.572078	7.83497	0.566738	0.0779859
0.994729	112.682	-0.383584	0.917795		1.90509	-144.192	-1.54499	-1.11462		1.52448	31.7442	1.29643	0.802069		0.0291036	44.6532	0.0207035	0.0204544		2.73996	177.222	-2.73674	0.132791
0.857277	88.972	0.015381	0.857139		3.63037	177.067	-3.62561	0.18577		1.08545	93.4295	-0.0649327	1.0835		1.06515	11.9484	1.04208	0.220519		0.92388	28.4306	0.812455	0.439854
1.59128	96.0249	-0.167023	1.58249		3.04095	178.95	-3.04044	0.055731		1.65925	52.9755	0.999127	1.32471		1.51172	-15.3006	1.45813	-0.398917		0.680101	-175.783	-0.678259	-0.050015
0.936856	-92.6993	-0.0441204	-0.935816		1.09127	177.073	-1.08985	0.055731		2.12882	43.3639	1.54767	1.46171		0.989915	2.88985	0.988656	0.0499076		1.58932	-178.197	-1.58853	-0.050015
0.552422	-74.5388	0.147268	-0.53243		2.15345	171.567	-2.13016	0.315809		1.58724	-34.8516	1.30255	-0.907033		0.37148	32.258	0.314144	0.198271		1.0978	135.432	-0.78209	0.770395
0.82475	-178.225	-0.824354	-0.0255434		2.16231	161.128	-2.04607	0.699407		0.563476	-13.3471	0.548256	-0.130079		1.29787	19.2999	1.22493	0.428963		2.61224	138.177	-1.94667	1.74192
1.28833	-6.40339	1.28029	-0.143684		2.88205	160.417	-2.71534	0.966004		0.392335	155.937	-0.358242	0.159968		2.85534	-98.0545	-0.400075	-2.82718		1.66561	92.8039	-0.081478	1.66361
2.65664	12.5038	2.59363	0.575175		1.91184	145.754	-1.58039	1.07588		1.43137	1.76336	1.43069	0.0440455		2.28591	-116.448	-1.01812	-2.04666		1.71367	79.5633	0.310428	1.68532
0.870354	45.7139	0.607717	0.623054		3.66338	161.626	-3.47662	1.15477		0.174085	89.9372	0.000190882	0.174085		1.98195	-81.2477	0.30158	-1.95887		0.942377	93.8766	-0.063712	0.94022
1.85998	153.851	-1.66961	0.81971		2.14811	120.748	-1.09826	1.84613		0.804626	145.077	-0.659732	0.460627		1.62746	-56.5597	0.896841	-1.35805		2.74548	143.276	-2.20056	1.6417
0.961668	72.233	0.29345	0.915802		2.69836	137.837	-2.00012	1.81126		2.16618	-83.14	0.258737	-2.15067		1.4596	-119.791	-0.725173	-1.26671		2.76403	112.219	-1.04521	2.55879
2.24708	26.4955	2.01107	1.00248		3.58865	145.156	-2.94525	2.05034		1.31201	-87.4599	0.0581455	-1.31072		2.20981	-167.283	-2.1556	-0.486475		3.88799	134.105	-2.70597	2.79182
1.86298	116.371	-0.827507	1.66911		3.15764	134.111	-2.19789	2.26714		1.52634	-65.6761	0.62869	-1.39085		0.638801	-146.084	-0.530114	-0.356436		1.36151	-40.8644	1.02965	-0.890796
2.24004	-38.9063	1.74314	-1.40685		0.746675	-178.125	-0.746275	-0.0244341		1.52037	-34.4492	1.25374	-0.860036		0.336518	-174.657	-0.335055	-0.0313382		0.0221442	53.5	0.0131719	0.0178008
3.06584	-31.47	2.6149	-1.60053		1.78705	178.699	-1.78659	0.0405854		2.21247	-21.9221	2.05249	-0.826018		2.11152	-110.248	-0.730756	-1.98103		2.07742	7.07354	2.06161	0.25582
1.37319	-54.9165	0.789267	-1.1237		2.21891	168.808	-2.1767	0.430702		0.440583	-107.498	-0.13247	-0.420196		1.77963	-131.704	-1.18395	-1.32866		0.797929	140.326	-0.61416	0.50941
2.41987	-27.4354	2.14771	-1.11495		1.62624	159.83	-1.52651	0.560741		1.36829	167.829	-1.33753	0.288481		1.20605	-99.9475	-0.208341	-1.18792		0.803747	41.7378	0.599756	0.535072
0.735408	-55.6074	0.415402	-0.606849		0.756563	84.0573	0.0783304	0.752497		1.68161	143.115	-1.34502	1.00933		0.375811	-3.05967	0.375276	-0.0200593		0.876358	75.5608	0.218522	0.848677
2.03259	-12.3874	1.98527	-0.436032		1.10936	132.277	-0.746275	0.820819		3.48846	-15.6539	3.35907	-0.941274		1.67079	154.557	-1.50875	0.717785		2.27687	23.6934	2.08495	0.914943
0.834167	-4.65111	0.83142	-0.0676409		2.86158	144.913	-2.34158	1.64487		2.89008	-12.9223	2.81689	-0.646307		1.56	123.477	-0.860494	1.30121		2.86203	19.6512	2.69534	0.962483
0.0903049	-73.7398	0.0252854	-0.0866927		3.16999	145.39	-2.60902	1.80051		1.59511	-12.0471	1.55998	-0.332926		3.87144	-49.9182	2.49275	-2.96214		1.60268	134.574	-1.1248	1.14167
2.24266	0.994906	2.24232	0.0389405		1.98728	76.62	0.459873	1.93334		0.0379835	-7.4173	0.0376657	-0.00490348		3.87826	-39.025	3.0129	-2.44198		2.70127	74.239	0.733734	2.59971
0.371846	38.4742	0.291113	0.231348		3.76833	143.315	-3.02196	2.25125		0.469962	46.6334	0.322706	0.341651		0.90019	-60.5582	0.442479	-0.783935		3.31052	-87.8051	0.126787	-3.30809
1.22045	164.035	-1.17338	0.335682		3.48424	122.303	-1.86195	2.945		1.40882	21.4774	1.311	0.515819		0.0344203	46.7909	0.0235663	0.0250876		2.75431	-105.011	-0.713389	-2.66032
2.08672	-99.9176	-0.359399	-2.05554		3.94033	126.877	-2.3646	3.15197		2.36348	29.3899	2.0593	1.15987		1.3312	9.10352	1.31443	0.210621		2.81725	-117.167	-1.28633	-2.50644
1.68066	-75.8188	0.411743	-1.62944		0.677672	-79.1987	0.126998	-0.665665		1.98129	-149.461	-1.70646	-1.00673		1.01614	158.368	-0.944575	0.374587		1.89037	-78.2242	0.385791	-1.85059
1.2615	-68.1276	0.469962	-1.1707		1.8709	-158.767	-1.74389	-0.677572		1.09243	-132.013	-0.731163	-0.81167		0.635408	82.864	0.0789339	0.630487		2.7775	-127.444	-1.68868	-2.20519
1.38642	-136.736	-1.00959	-0.950206		2.46915	-174.831	-2.45911	-0.222435		0.651716	-102.089	-0.136485	-0.637264		2.87276	-78.6737	0.564202	-2.81681		2.71029	-41.9775	2.01485	-1.81275
1.34899	-35.8273	1.09374	-0.789624		2.20097	-177.594	-2.19903	-0.0923961		1.19724	-172.249	-1.1863	-0.161475		2.4023	-65.4506	0.998101	-2.18514		2.07181	-110.141	-0.713389	-1.94511
0.835574	-131.572	-0.554458	-0.625109		1.16326	174.937	-1.15872	0.102662		0.232008	-122.804	-0.125693	-0.19501		2.25831	-98.8149	-0.346072	-2.23164		1.65368	-154.584	-1.49362	-0.709739
1.60446	-13.0779	1.56284	-0.363049		0.928278	161.67	-0.881177	0.291936		1.29093	14.8848	1.24762	0.331611		0.979649	-67.2656	0.378595	-0.903537		1.13614	-30.2131	0.981805	-0.571725
2.33511	-7.01979	2.3176	-0.285378		0.184372	58.666	0.0958785	0.157482		2.14354	161.398	-2.03155	0.683778		0.732402	-111.777	-0.271723	-0.680132		1.66638	-18.8598	1.57691	-0.538663
1.55889	-168.904	-1.52975	-0.300011		0.584029	109.859	-0.198403	0.549297		1.63722	147.535	-1.38136	0.878837		2.31013	-16.7262	2.21239	-0.664854		2.88639	-37.2749	2.29681	-1.74812
0.0503811	-47.6291	0.0339532	-0.0372214		1.78082	154.991	-1.61385	0.752857		1.29282	110.367	-0.44994	1.212		0.693771	-17.8128	0.660513	-0.21223		2.04733	-41.8475	1.5251	-1.36587
1.96075	12.8139	1.91192	0.434864		0.855403	104.547	-0.214853	0.827981		1.624	123.507	-0.896512	1.35412		1.57791	-2.31772	1.57662	-0.0638119		1.17406	-43.6138	0.850023	-0.809857
0.887466	121.289	-0.460915	0.758388		1.85065	146.815	-1.54883	1.01294		1.69633	53.3468	1.01266	1.3609		0.354486	-142.452	-0.281052	-0.216033		0.905762	-124.681	-0.515386	-0.744837
1.82519	116.266	-0.807708	1.63674		2.16185	150.091	-1.87393	1.07795		0.763899	-68.0839	0.285124	-0.708693		0.10199	112.016	-0.0382333	0.094553		2.98177	-11.5696	2.92119	-0.598017
2.20072	46.0091	1.5285	1.58331		1.49236	109.922	-0.508521	1.40305		1.79066	-54.491	1.04007	-1.45764		0.634398	62.7586	0.290389	0.564035		1.14875	12.1693	1.12294	0.242158
0.568832	-69.6236	0.19806	-0.533237		2.09444	126.713	-1.25208	1.67897		1.0727	-145.254	-0.88142	-0.611373		1.25773	133.231	-0.861467	0.916383		2.8704	3.16095	2.86603	0.158277
1.05318	-19.4356	0.993165	-0.350443		1.73676	-55.1076	0.993489	-1.42454		0.541547	-111.515	-0.198611	-0.503812		1.46573	40.2857	1.1181	0.947742		0.240791	53.696	0.142565	0.19405
0.916021	170.667	-0.903894	0.148561		1.43756	-50.4593	0.915191	-1.10861		0.704362	-128.779	-0.441152	-0.5491		2.53888	25.661	2.28848	1.09945		2.50609	15.699	2.41261	0.678107
0.457374	177.51	-0.456943	0.0198671		1.6712	-38.6423	1.30531	-1.04359		1.78885	122.85	-0.970334	1.50281		1.70956	103.494	-0.398908	1.66236		1.42428	-97.1981	-0.178462	-1.41305
0.613908	130.236	-0.396549	0.468649		1.69263	-17.2899	1.61614	-0.50306		2.70064	105.204	-0.708246	2.60612		2.29314	46.1085	1.58982	1.65256		1.03447	-137.578	-0.763637	-0.697837
1.46448	152.771	-1.3022	0.670062		0.656096	-28.647	0.575783	-0.31454		0.589031	-65.3178	0.24597	-0.535216		2.62536	101.985	-0.545189	2.56813		1.54899	-155.887	-1.41383	-0.632817
1.66797	42.6305	1.22719	1.12966		2.11124	-6.58715	2.0973	-0.242189		0.143929	17.5339	0.137242	0.0433614		2.63965	79.6175	0.475715	2.59643		0.763902	-18.3661	0.72499	-0.240696
1.62554	125.197	-0.936944	1.32835		1.17725	-8.23562	1.16511	-0.168634		2.11805	154.666	-1.91435	0.906305		2.06494	-98.2771	-0.29727	-2.04343		1.90224	0.489931	1.90217	0.0162657
1.6655	73.7241	0.466778	1.59875		0.439126	7.88572	0.434974	0.0602471		1.64753	-105.427	-0.438268	-1.58817		2.48616	-131.973	-1.66268	-1.84837		0.568844	165.465	-0.550638	0.142765
1.8202	61.4086	0.871078	1.59824		0.273655	-11.6925	0.267977	-0.0554588		1.58971	-168.032	-1.55516	-0.329651		2.92885	-165.304	-2.83303	-0.743042		1.50703	28.8639	1.31981	0.72749
2.48886	121.506	-1.30067	2.12196		1.15125	47.0001	0.785152	0.841975		0.55998	-115.898	-0.244584	-0.503742		0.713717	-64.5935	0.306211	-0.644692		1.15207	125.829	-0.674384	0.934067
2.13735	106.756	-0.616198	2.0466		1.60833	27.3128	1.42902	0.737978		0.330442	10.8371	0.324549	0.0621289		1.86055	176.851	-1.85774	0.102212		0.985546	-3.37408	0.983838	-0.0580041
2.32397	65.658	0.957899	2.11737		1.24951	46.6135	0.858308	0.908065		2.64667	158.508	-2.46265	0.969644		0.138086	21.8077	0.128204	0.051298		0.98791	135.294	-0.702128	0.694969
2.6337	92.8105	-0.129138	2.63053		1.33931	62.1355	0.625971	1.18402		0.849902	97.8409	-0.115945	0.841956		1.2436	166.17	-1.20754	0.29727		2.13665	19.793	2.01042	0.723522
3.52674	-72.0645	1.08604	-3.35535		0.435055	-37.5067	0.345121	-0.264885		1.99469	-156.324	-1.8268	-0.80099		0.286193	108.975	-0.0930561	0.270642		1.29446	44.8674	0.917436	0.9132
4.19642	-59.0859	2.15592	-3.60027		1.80172	163.159	-1.72445	0.521984		0.735997	-75.6116	0.182891	-0.712912		2.68094	159.304	-2.50793	0.947465		1.33296	101.806	-0.272729	1.30477
4.0258	-67.3723	1.54889	-3.71591		0.80525	51.7626	0.498386	0.632486		0.977914	-52.1509	0.600032	-0.77219		2.0559	-52.5365	1.25052	-1.63186		2.75534	33.9113	2.28667	1.53723
3.26121	-86.7794	0.183215	-3.25606		1.271	68.0422	0.475256	1.1788		0.942161	-139.974	-0.721466	-0.605932		1.35325	-53.7076	0.801001	-1.09073		0.788016	-125.643	-0.4592	-0.640394
2.96303	-95.0638	-0.261533	-2.95147		1.68814	126.433	-1.00256	1.35819		0.724822	-10.1891	0.713391	-0.128219		1.69293	-24.4224	1.54145	-0.699957		0.316012	-25.6352	0.284906	-0.13672
3.63908	-48.0983	2.43038	-2.70854		1.40961	-144.13	-1.14227	-0.825964		1.19344	155.807	-1.08862	0.489084		0.761724	-40.4475	0.579673	-0.494169		1.41887	19.5624	1.33697	0.475086
2.86946	-57.331	1.54889	-2.41552		1.59641	165.492	-1.5455	0.399922		0.279125	-22.8722	0.257179	-0.10849		1.14648	-14.5383	1.10977	-0.287798		0.841967	134.75	-0.592756	0.597954
3.35722	-40.7309	2.54404	-2.19061		0.895437	131.552	-0.593944	0.670102		0.777441	-62.7212	0.356317	-0.69098		0.39606	-53.5897	0.235087	-0.318744		1.87753	30.6545	1.61516	0.957278
2.13696	-69.8114	0.737492	-2.00567		0.798375	98.2872	-0.115074	0.790039		0.9463	-41.6804	0.70676	-0.629266		2.31681	3.03108	2.31357	0.122508		1.32436	66.7685	0.522389	1.21697
2.91774	-31.0217	2.50042	-1.50369		3.47435	-53.1365	2.0843	-2.77972		0.624408	-136.795	-0.455137	-0.427476		1.67141	-80.2361	0.283452	-1.6472		0.549904	-120.44	-0.278601	-0.474105
2.2368	-24.7782	2.03087	-0.937455		3.24158	-63.5377	1.44447	-2.90195		0.297437	-81.3516	0.0447261	-0.294055		1.02985	-102.569	-0.22411	-1.00517		1.41326	-6.05419	1.40538	-0.149056
1.35558	-140.893	-1.05189	-0.855051		2.132	-80.1043	0.366393	-2.10028		0.391096	175.944	-0.390117	0.0276602		1.19896	-141.578	-0.939324	-0.745096		1.01498	-170.776	-1.00185	-0.162687
0.508785	-113.962	-0.206637	-0.464934		2.52412	-47.4336	1.70743	-1.859		1.06389	13.8126	1.03312	0.253999		0.292182	-51.4537	0.182072	-0.228517		0.457373	124.155	-0.256786	0.378486
1.14387	-14.5661	1.10711	-0.28768		1.55899	-56.0862	0.869832	-1.29377		1.24167	137.963	-0.922195	0.83144		1.41249	-170.837	-1.39446	-0.22494		1.01384	20.273	0.951037	0.35129
0.996729	-171.935	-0.986871	-0.139836		1.35871	-54.6513	0.786087	-1.10823		0.433664	34.7351	0.356383	0.247095		1.07685	1.43634	1.07652	0.0269926		0.372145	61.6172	0.176903	0.32741
1.80516	-131.054	-1.18557	-1.36126		1.14446	-123.77	-0.636151	-0.951365		2.45149	-44.4977	1.7486	-1.7182		0.946209	117	-0.42957	0.843079		2.28846	11.58	2.24188	0.459378
1.04513	-40.9279	0.789634	-0.684675		1.8648	-17.1481	1.78191	-0.549824		1.96327	-53.3402	1.1722	-1.57492		2.50741	-76.8615	0.569949	-2.44178		2.20111	26.8486	1.96383	0.994097
0.354197	-20.7107	0.331308	-0.125262		0.366459	-71.5236	0.116136	-0.34757		1.27146	-75.8876	0.310013	-1.23309		1.92326	-122.117	-1.0225	-1.62893		1.23486	111.362	-0.449809	1.15002
1.44565	174.697	-1.43946	0.133615		2.2901	-2.32384	2.28821	-0.0928576		1.27602	-56.3896	0.706332	-1.0627		1.79666	-56.084	1.00249	-1.49097		1.35306	76.0428	0.326354	1.31312
0.210317	161.792	-0.199785	0.0657189		1.09194	17.3176	1.04244	0.325035		2.33443	-21.7999	2.16748	-0.866928		1.08489	-89.1589	0.0159254	-1.08477		3.21867	25.7747	2.89845	1.39959
1.20166	-107.887	-0.369081	-1.14358		0.377595	50.6792	0.239267	0.292112		1.82735	-33.8462	1.51768	-1.01777		1.98288	-155.454	-1.80368	-0.823743		2.03275	53.7971	1.20063	1.64028
0.927681	-48.0276	0.620408	-0.6897		1.58369	18.9939	1.49746	0.51544		2.04868	-19.0444	1.93655	-0.668486		0.118732	-85.9561	0.00837306	-0.118436		0.594258	-87.0183	0.0309119	-0.593453
0.999678	6.45293	0.993344	0.112351		1.91145	-57.3164	1.03218	-1.60881		2.60724	-7.275	2.58625	-0.33016		1.80381	175.197	-1.79747	0.151028		0.66143	-144.983	-0.541699	-0.379542
0.125823	40.5574	0.0955944	0.081811		0.700845	-76.2435	0.166658	-0.680741		1.36506	-7.97759	1.35185	-0.189451		0.968958	23.0667	0.891489	0.379639		0.846226	161.347	-0.801777	0.270653
1.75678	159.869	-1.64946	0.604612		1.71519	-29.6742	1.49025	-0.849135		0.0772174	-25.1484	0.069898	-0.0328147		0.282093	70.3591	0.0948181	0.26568		0.390594	121.162	-0.202115	0.334235
1.06904	142.718	-0.850599	0.647553		0.637852	-120.377	-0.322553	-0.550286		0.221621	120.304	-0.111828	0.191338		1.45544	166.223	-1.41356	0.346608		0.558376	66.7002	0.220861	0.512839
1.65953	133.833	-1.14932	1.19712		1.03313	-26.0019	0.928553	-0.452925		1.78494	12.5643	1.74219	0.388287		0.0230104	0.0957322	0.0230103	3.84467e-05		2.26316	150.497	-1.9697	1.11453
1.41256	93.9286	-0.0967789	1.40924		1.77441	-10.2143	1.74629	-0.314656		0.62699	44.4471	0.447607	0.439051		1.60479	168.377	-1.57188	0.323326		1.4538	128.275	-0.900543	1.14129
1.57677	70.5566	0.524867	1.48685		1.39188	-12.8019	1.35728	-0.308415		2.88276	-3.61836	2.87702	-0.181932		0.997476	30.5592	0.858931	0.507145		1.95517	-29.1397	1.70771	-0.95205
2.11347	-90.354	-0.0130593	-2.11343		1.11358	179.142	-1.11346	0.0166826		0.401884	152.681	-0.357059	0.184444		1.94239	156.297	-1.77853	0.780847		0.740027	-69.1624	0.263243	-0.691623
1.81433	-67.8265	0.684749	-1.68015		1.35738	0.704199	1.35728	0.0166826		1.44068	2.41282	1.43941	0.0606515		1.16007	54.9235	0.666658	0.949384		0.0797834	-28.2363	0.0702895	-0.0377462
1.60654	-119.606	-0.793686	-1.3968		1.48956	15.1102	1.43806	0.388295		2.70753	14.3214	2.62339	0.669736		1.58879	121.246	-0.824136	1.35833		0.718766	15.7237	0.69187	0.194784
1.02029	-25.4892	0.920983	-0.439073		1.83343	9.08446	1.81043	0.289481		1.34912	38.8577	1.05057	0.846419		2.85374	139.821	-2.18036	1.84116		0.588203	162.651	-0.561444	0.175395
0.641732	-146.254	-0.533608	-0.356486		3.19256	-161.204	-3.02231	-1.02862		1.04153	83.1712	0.123842	1.03414		2.59902	113.28	-1.0272	2.38742		1.64676	147.803	-1.39353	0.877442
1.04814	-14.9248	1.01278	-0.26995		1.71594	-138.78	-1.2907	-1.13072		2.66207	36.2886	2.14575	1.57555		0.787251	-91.6189	-0.0222407	-0.786937		1.0905	89.5608	0.00835965	1.09047
0.468269	-7.76888	0.463971	-0.0632993		0.94468	-107.973	-0.291492	-0.898584		0.534637	-25.3632	0.483103	-0.229014		0.783091	-50.5526	0.497553	-0.604709		1.89733	99.6099	-0.316738	1.8707
0.173855	-146.681	-0.145278	-0.0954974		0.228963	12.0708	0.2239	0.0478809		1.96349	-174.863	-1.95561	-0.175804		1.06389	174.065	-1.05818	0.110013		1.7142	-112.324	-0.651142	-1.58572
0.111313	73.1711	0.0322267	0.106546		3.05815	171.219	-3.02231	0.466825		0.278174	116.047	-0.122149	0.24992		1.64384	157.44	-1.51805	0.630661		1.58611	-149.48	-1.36636	-0.805484
1.48933	12.59	1.45352	0.324635		2.01076	151.087	-1.76013	0.972172		0.934651	22.8756	0.861142	0.363329		1.0911	78.3405	0.220506	1.06859		1.88668	-179.233	-1.88651	-0.0252503
0.311354	125.519	-0.180888	0.253418		2.97378	160.756	-2.80762	0.980127		2.82458	135.706	-2.02175	1.97251		1.2022	99.6444	-0.201407	1.18521		0.454891	11.3717	0.445961	0.0896923
0.699884	149.079	-0.600414	0.359639		2.26621	-143.13	-1.81297	-1.35973		1.00791	-85.6818	0.075892	-1.00505		1.78853	-74.3566	0.482276	-1.72228		0.974673	-1.39167	0.974385	-0.0236717
1.45967	21.8533	1.35478	0.543338		2.0156	-133.684	-1.39213	-1.4576		1.37711	-33.594	1.14711	-0.761961		1.51526	-80.1509	0.259191	-1.49292		1.90771	-115.904	-0.833405	-1.71604
1.46081	132.8	-0.99254	1.07183		1.46466	-138.547	-1.09776	-0.969611		1.61388	-20.3391	1.51326	-0.560946		1.68007	-37.2796	1.33682	-1.01763		2.70376	-153.004	-2.40914	-1.22733
1.00995	79.6069	0.182195	0.993379		2.47959	-160.209	-2.33313	-0.839572		0.474508	-62.9284	0.21595	-0.42252		1.1196	-39.2763	0.866684	-0.708774		1.48325	-151.525	-1.30381	-0.707173
1.28268	55.4382	0.72766	1.05631		1.22468	-161.705	-1.16278	-0.384436		1.32487	-3.84033	1.32189	-0.0887346		2.27088	-16.1468	2.1813	-0.631529		0.987405	-101.596	-0.198481	-0.967251
2.53158	26.7498	2.26065	1.13945		0.231452	144.099	-0.187483	0.13572		1.71418	4.56653	1.70874	0.136477		1.80566	-12.2464	1.76457	-0.383011		0.323122	-144.635	-0.2635	-0.187017
1.55974	107.089	-0.458349	1.49087		2.40653	175.215	-2.39815	0.20074		0.360425	68.4894	0.132158	0.335322		0.913477	5.36713	0.909472	0.0854441		0.473712	49.463	0.307884	0.360014
2.85718	35.5211	2.32546	1.66003		1.1125	92.9598	-0.0574444	1.11101		0.902499	147.286	-0.759343	0.487753		0.220024	36.217	0.177512	0.13		1.4344	37.1687	1.14302	0.866613
2.15114	54.5151	1.24871	1.75161		1.31929	103.664	-0.311658	1.28195		1.28454	28.3443	1.13054	0.609861		1.66254	19.0701	1.5713	0.543193		1.39995	113.496	-0.558142	1.28387
1.88079	77.0962	0.420008	1.83329		1.9323	128.095	-1.19216	1.5207		4.59141	-42.9111	3.3628	-3.12612		0.955492	89.8422	0.00263129	0.955489		0.975081	16.2265	0.936239	0.272471
2.03215	106.828	-0.588315	1.94512		2.68925	142.659	-2.13807	1.63117		3.60013	-48.649	2.3785	-2.70253		1.06837	-55.3342	0.607679	-0.878721		1.13118	76.305	0.267811	1.09902
2.17757	65.4604	0.904393	1.98088		0.502702	-100.466	-0.0913142	-0.494339		4.46429	-29.1879	3.89744	-2.17713		1.37325	-32.4603	1.1587	-0.737044		2.81898	-71.9009	0.875749	-2.67949
3.09573	43.205	2.2565	2.11937		2.56219	179.423	-2.56206	0.0258166		2.86635	-34.9144	2.35043	-1.64056		1.61588	-163.095	-1.54606	-0.469883		2.30242	-100.077	-0.402838	-2.2669
2.6096	102.835	-0.579699	2.5444		0.502146	14.0259	0.487175	0.1217		4.1557	-19.6033	3.91483	-1.39426		0.977653	169.372	-0.960881	0.180312		2.76879	-29.0258	2.42104	-1.34343
3.49082	51.3879	2.17843	2.72769		2.44203	171.789	-2.417	0.348747		0.50664	-106.227	-0.14158	-0.486456		0.342321	53.8239	0.202062	0.276324		2.20696	-16.5092	2.11597	-0.627151
3.37252	65.8444	1.38009	3.07721		0.61672	147.293	-0.518934	0.333244		2.03181	-11.8131	1.98878	-0.415954		1.20042	40.6239	0.91112	0.781583		2.37935	-82.3501	0.316739	-2.35818
3.31484	79.4689	0.605852	3.259		1.35714	167.839	-1.32668	0.285895		1.40706	25.8117	1.26668	0.612657		1.69282	25.1373	1.5325	0.719093		1.83616	-74.4721	0.491553	-1.76914
3.78304	76.07	0.910717	3.67178		1.90844	165.403	-1.84684	0.480953		1.85044	20.2803	1.73573	0.641388		1.72892	138.057	-1.28598	1.1556		1.36662	-104.078	-0.33242	-1.32558
2.06428	160.456	-1.94535	0.690552		0.965196	37.4065	0.766699	0.586324		0.929213	-102.686	-0.204063	-0.906529		1.33942	96.6659	-0.155478	1.33036		1.80921	159.79	-1.69783	0.625007
1.0368	133.218	-0.709983	0.755571		0.682151	87.4545	0.0302962	0.681478		0.103325	-14.9478	0.0998283	-0.0266515		2.90416	26.0558	2.609	1.27564		1.15543	111.991	-0.432658	1.07137
5.07002	161.808	-4.8166	1.58287		1.02965	62.1848	0.480454	0.910677		0.489339	-170.663	-0.482855	-0.0793922		2.23846	36.6532	1.79583	1.33629		1.52133	-50.8605	0.960281	-1.17996
5.13126	152.69	-4.5593	2.35428		1.60002	130.222	-1.03321	1.2217		0.948926	10.408	0.933313	0.17143		2.23196	54.7849	1.28705	1.82349		1.79527	-27.2408	1.59616	-0.821753
2.66922	108.915	-0.865272	2.52508		2.32681	145.252	-1.91186	1.32621		0.441786	50.5728	0.280577	0.341249		3.00558	49.6685	1.94524	2.29119		1.09838	-73.9984	0.302785	-1.05583
3.00012	112.977	-1.17115	2.76209		2.04293	-114.264	-0.839515	-1.86246		1.24296	138.228	-0.927011	0.828016		3.69018	41.0964	2.78094	2.42565		0.751752	-168.836	-0.737527	-0.145553
3.62019	123.553	-2.00091	3.01698		2.16968	-131.398	-1.43479	-1.62754		1.71921	120.516	-0.872972	1.48108		3.05276	97.8879	-0.418949	3.02388		0.327203	120.125	-0.164221	0.283007
4.25642	130.858	-2.7845	3.21926		3.0022	-145.616	-2.47764	-1.69543		1.23115	93.747	-0.0804562	1.22852		3.72737	54.2294	2.1788	3.02425		0.524984	45.3885	0.368694	0.373728
5.31572	137.131	-3.89594	3.61643		2.13827	-144.864	-1.74866	-1.23061		0.851688	-49.2945	0.555446	-0.645641		1.49521	-121.061	-0.771462	-1.28082		1.3323	160.733	-1.25768	0.439623
2.70072	-59.8491	1.35652	-2.33533		1.20224	-77.8429	0.253182	-1.17528		1.411	-20.7731	1.31928	-0.500438		0.92886	-109.783	-0.314383	-0.874039		2.21926	21.1036	2.07042	0.799056
2.30151	-66.8929	0.903227	-2.11686		1.72622	-150.494	-1.50234	-0.850179		0.287316	-18.7679	0.272039	-0.0924395		1.22635	-139.22	-0.928615	-0.801002		3.01979	17.21	2.88459	0.893482
2.79057	-42.7595	2.04886	-1.89458		0.619374	-72.3143	0.188163	-0.590101		0.907573	-168.21	-0.888427	-0.185436		0.610269	-54.9642	0.350348	-0.499685		1.22627	105.897	-0.335881	1.17938
[truncated: 4,403 more rows]
