# Supplementary material for: RNA promotes phase separation of glycolysis enzymes into yeast G bodies in hypoxia
Source: eLife. 2020 Apr 16;9:e48480. doi: 10.7554/eLife.48480 (PMC7162659; doi:10.7554/eLife.48480)
Supplement: Figure 3—source data 1. [file elife-48480-fig3-data1.xlsx]

## Sheet: Sheet1
	real values					expected
		enriched over total RNA and flow through	not enriched				enriched over total RNA and flow through	not enriched			Chi square test p-value:	7.725E–07
	Bound by glycolysis enzymes in PAR-CLIP	46	1494	1540		Bound by glycolysis enzymes in PAR-CLIP	24.8864	1515.11	1540
	Not bound by glycolysis enzymes in PAR-CLIP	55	4655	4710		Not bound by glycolysis enzymes in PAR-CLIP	76.1136	4633.89	4710
		101	6149	6250			101	6149	6250
	real values					expected
		enriched over flow through	not enriched				enriched over flow through	not enriched			Chi square test p-value:	8.865E–7
	Bound by glycolysis enzymes in PAR-CLIP	208	1332	1540		Bound by glycolysis enzymes in PAR-CLIP	176.669	1363.33	1540
	Not bound by glycolysis enzymes in PAR-CLIP	509	4201	4710		Not bound by glycolysis enzymes in PAR-CLIP	540.331	4169.67	4710
		717	5533	6250			717	5533	6250
