# Supplementary material for: RNA promotes phase separation of glycolysis enzymes into yeast G bodies in hypoxia
Source: eLife. 2020 Apr 16;9:e48480. doi: 10.7554/eLife.48480 (PMC7162659; doi:10.7554/eLife.48480)
Supplement: Figure 3—source data 2. [file elife-48480-fig3-data2.xlsx]

## Sheet: Sheet1
	Log Enrichment over total RNA	% of mRNAs within 0.13 µm
YML133C	0.735995	1.94446
UTH1	0.282443	1.60118
FAS1	0.278381	1.4243
CDC19	-0.183169	1.19111
OLE1	-0.419366	0.954404
