# Supplementary material for: RNA promotes phase separation of glycolysis enzymes into yeast G bodies in hypoxia
Source: eLife. 2020 Apr 16;9:e48480. doi: 10.7554/eLife.48480 (PMC7162659; doi:10.7554/eLife.48480)
Supplement: Figure 3—source data 3. [file elife-48480-fig3-data3.xlsx]

## Sheet: Sheet1
		distance from G body center (µm)	0	0.13	0.26	0.39	0.52	0.65	0.78	0.91	1.04	1.17	1.3	1.43	1.56	1.69	1.82	1.95	2.08	2.21	2.34	2.47	2.6	2.73	2.86	2.99	3.12	3.25	3.38	3.51	3.64	3.77	3.9	4.03	4.16	4.29	4.42	4.55	4.68	4.81	4.94	5.07	5.2	5.33	5.46	5.59	5.72	5.85	5.98
Percent of mRNAs	average	YML133C	0	1.94446	3.53117	5.99016	8.75182	13.1189	17.8374	22.6827	28.007	32.4954	37.7406	43.2224	48.1832	53.2957	58.529	62.7081	66.839	70.606	74.1556	77.0871	80.8487	84.0042	86.9965	89.4496	91.0786	93.0589	94.4641	95.5304	96.4632	97.293	97.9046	98.3528	98.8978	99.2915	99.4247	99.5519	99.6488	99.8487	99.8789	99.9092	99.9092	99.9092	99.9395	99.9697	99.9697	99.9697	99.9697
	stdev		0	0.438521	0.0569359	0.346067	1.06323	0.965264	0.541498	1.22261	0.627011	0.18631	0.301738	0.174076	0.769366	1.66459	1.87465	1.62126	1.64193	0.634388	1.37409	1.23955	1.67962	1.43392	1.72772	1.85831	0.994557	0.456608	0.217969	0.869883	0.990603	1.05127	0.80339	0.581063	0.324556	0.282064	0.29931	0.222327	0.188147	0.214015	0.171212	0.128409	0.128409	0.128409	0.0856061	0.0428031	0.0428031	0.0428031	0.0428031
	sterr		0	0.310081	0.0402597	0.244706	0.751816	0.682545	0.382897	0.864517	0.443363	0.131741	0.213361	0.12309	0.544024	1.17704	1.32558	1.1464	1.16102	0.44858	0.971627	0.876491	1.18767	1.01393	1.22168	1.31402	0.703258	0.32287	0.154127	0.6151	0.700462	0.743363	0.568083	0.410874	0.229496	0.19945	0.211644	0.157209	0.13304	0.151332	0.121065	0.090799	0.090799	0.090799	0.0605327	0.0302663	0.0302663	0.0302663	0.0302663
	average	UTH1	0	1.60118	3.6939	5.57696	8.40919	11.7379	15.811	19.7578	24.1084	28.7555	34.0694	39.3399	44.3474	48.4789	53.5593	57.9393	61.9151	66.6549	70.397	74.5193	78.4368	81.6097	84.1547	86.7633	88.8804	90.7879	92.783	93.9899	95.3868	96.5206	97.2116	97.9708	98.3942	98.9344	99.241	99.4648	99.6546	99.7957	99.9027	99.927	99.9514	99.9757	99.9757	100	100	100	100
	stdev		0	0.338438	0.752951	0.114336	0.0614233	0.366758	0.00508735	0.496708	0.321066	0.466864	1.13729	0.493262	0.633996	0.981858	1.22577	0.671882	0.895983	1.14015	1.41949	0.40469	0.160849	0.213505	0.535039	0.0788422	0.301279	0.110023	0.301396	0.176604	0.35438	0.100598	0.183707	0.363218	0.342892	0.350183	0.30224	0.274881	0.199321	0.192546	0.137569	0.103177	0.0687847	0.0343924	0.0343924	0	0	0	0
	sterr		0	0.239312	0.532417	0.080848	0.0434328	0.259337	0.0035973	0.351226	0.227028	0.330123	0.804187	0.348789	0.448303	0.694279	0.86675	0.475092	0.633556	0.806209	1.00373	0.286159	0.113738	0.150971	0.37833	0.0557498	0.213036	0.0777978	0.213119	0.124878	0.250584	0.0711337	0.129901	0.256834	0.242461	0.247617	0.213716	0.19437	0.140941	0.13615	0.0972763	0.0729572	0.0486381	0.0243191	0.0243191	0	0	0	0
	average	FAS1	0	1.4243	3.20129	5.19679	8.59913	12.7238	16.834	20.7463	25.6779	29.8493	34.6733	39.3866	44.72	49.8846	54.3853	58.8625	63.5436	67.7615	71.4403	75.1776	78.1953	81.318	84.0793	86.5204	88.9583	91.0846	92.9604	94.3527	96.039	97.0846	97.8244	98.4826	99.0243	99.202	99.5281	99.6476	99.7466	99.7466	99.8078	99.9039	99.9039	99.9039	99.9621	100	100	100	100
	stdev		0	0.340977	0.0309463	0.497762	0.705977	0.75813	1.00389	1.93335	2.05606	2.38837	2.89412	3.67169	3.3992	3.4232	4.32833	4.34364	4.64745	4.51017	4.03885	4.2926	4.0639	4.09068	3.82061	4.06115	3.44072	2.91483	2.57003	2.50503	1.67813	1.12269	0.884252	0.530411	0.225928	0.26312	0.0250278	0.0368429	0.0698639	0.0698639	0.156413	0.0782066	0.0782066	0.0782066	0.0535281	0	0	0	0
	sterr		0	0.241107	0.0218823	0.351971	0.499201	0.536079	0.709856	1.36708	1.45386	1.68883	2.04645	2.59628	2.4036	2.42057	3.06059	3.07142	3.28624	3.18917	2.8559	3.03533	2.87361	2.89255	2.70158	2.87167	2.43295	2.06109	1.81728	1.77133	1.18662	0.793864	0.62526	0.375057	0.159755	0.186054	0.0176974	0.0260519	0.0494013	0.0494013	0.110601	0.0553004	0.0553004	0.0553004	0.0378501	0	0	0	0
	average	CDC19	0	1.19111	2.84097	4.99016	8.06023	11.4094	15.5317	20.138	24.9405	30.0567	35.2176	39.987	45.8416	51.4961	56.8019	61.8399	66.409	70.3622	73.6736	76.7248	80.2706	83.2935	86.2369	88.3678	90.4004	92.3893	94.1433	95.202	96.2165	96.8535	97.3734	97.8686	98.256	98.7117	99.0986	99.3241	99.4465	99.6132	99.6573	99.7845	99.9411	100	100	100	100	100	100
	stdev		0	0.855028	0.561696	0.145058	0.0751845	0.315449	0.982994	2.21018	3.29833	4.08092	4.38554	4.55272	6.08817	7.21557	8.97412	9.72922	9.48834	8.45965	7.64737	7.34134	7.02705	5.93162	5.63973	5.11458	4.86671	4.26576	3.58234	2.91466	2.30942	1.96143	1.36445	0.940671	0.531032	0.301267	0.307147	0.126481	0.0915236	0.00588046	0.0683273	0.0282832	0.0832625	0	0	0	0	0	0
	sterr		0	0.604596	0.397179	0.102572	0.0531635	0.223056	0.695082	1.56283	2.33227	2.88565	3.10105	3.21926	4.30499	5.10218	6.34566	6.8796	6.70927	5.98188	5.40751	5.19111	4.96888	4.19429	3.98789	3.61655	3.44128	3.01635	2.5331	2.06097	1.633	1.38694	0.964813	0.665155	0.375497	0.213028	0.217186	0.0894355	0.064717	0.00415812	0.0483147	0.0199992	0.0588755	0	0	0	0	0	0
	average	OLE1	0	0.954404	2.48041	4.57702	7.155	10.3156	14.101	18.5553	22.7654	27.4864	32.1961	36.7326	41.5694	46.4462	51.2212	55.6438	60.2183	64.9854	68.8919	73.0055	76.6425	79.7973	82.9506	85.3831	87.8615	90.3433	92.3925	94.0203	95.1244	96.1656	97.0317	97.6023	98.1893	98.743	99.0509	99.33	99.638	99.7335	99.8127	99.8711	99.8711	99.9126	99.9459	99.9459	100	100	100
	stdev		0	0.000493756	0.220326	0.308811	1.13677	1.67333	2.0366	1.70227	1.96186	3.06128	3.14687	3.86804	4.66163	4.86604	5.92452	6.13225	5.55695	5.3128	5.78874	5.79433	5.30213	5.24336	4.65412	4.161	3.67403	2.89827	2.45013	1.81689	1.67579	1.44592	1.14433	1.01199	0.785448	0.570502	0.419	0.343957	0.192454	0.0927967	0.0873507	0.111257	0.111257	0.0525519	0.0409523	0.0409523	0	0	0
	sterr		0	0.000349138	0.155794	0.218363	0.803821	1.18323	1.4401	1.20369	1.38724	2.16465	2.22517	2.73511	3.29627	3.44081	4.18927	4.33616	3.92936	3.75671	4.09326	4.09721	3.74917	3.70762	3.29096	2.94227	2.59793	2.04939	1.7325	1.28474	1.18496	1.02242	0.809162	0.715588	0.555396	0.403406	0.296278	0.243214	0.136086	0.0656172	0.0617662	0.0786708	0.0786708	0.0371598	0.0289576	0.0289576	0	0	0
		YML133C	% mRNA within bin / % OLE1 mRNA within bin	2.03736	1.42362	1.30875	1.22317	1.27175	1.26498	1.22244	1.23024	1.18224	1.17221	1.17668	1.1591	1.14747	1.14267	1.12696	1.10995	1.08649	1.07641	1.05591	1.05488	1.05272	1.04878	1.04763	1.03661	1.03006	1.02242	1.01606	1.01407	1.01172	1.009	1.00769	1.00722	1.00555	1.00377	1.00223	1.00011	1.00115	1.00066	1.00038	1.00038	0.999966	0.999935	1.00024	0.999697	0.999697	0.999697
		UTH1		1.67767	1.48923	1.21847	1.17529	1.13788	1.12127	1.06481	1.05899	1.04617	1.05818	1.07098	1.06683	1.04376	1.04565	1.04125	1.02818	1.02569	1.02185	1.02074	1.02341	1.02271	1.01452	1.01616	1.0116	1.00492	1.00423	0.999677	1.00276	1.00369	1.00185	1.00378	1.00209	1.00194	1.00192	1.00136	1.00017	1.00062	1.0009	1.00056	1.0008	1.00063	1.0003	1.00054	1	1	1
		FAS1		1.49234	1.29063	1.13541	1.20183	1.23345	1.19382	1.11808	1.12794	1.08597	1.07694	1.07225	1.07579	1.07403	1.06177	1.05785	1.05522	1.04272	1.03699	1.02975	1.02026	1.01906	1.01361	1.01332	1.01248	1.00821	1.00615	1.00354	1.00962	1.00956	1.00817	1.00902	1.0085	1.00465	1.00482	1.0032	1.00109	1.00013	0.999951	1.00033	1.00033	0.999913	1.00016	1.00054	1	1	1
		CDC19		1.24801	1.14536	1.09026	1.12652	1.10603	1.10146	1.0853	1.09554	1.09351	1.09385	1.0886	1.10277	1.10872	1.10895	1.11135	1.1028	1.08274	1.06941	1.05095	1.04734	1.04381	1.03962	1.03496	1.0289	1.02265	1.01895	1.01257	1.01148	1.00715	1.00352	1.00273	1.00068	0.999683	1.00048	0.99994	0.998079	0.998793	0.998443	0.999133	1.0007	1.00087	1.00054	1.00054	1	1	1
		OLE1		1	1	1	1	1	1	1	1	1	1	1	1	1	1	1	1	1	1	1	1	1	1	1	1	1	1	1	1	1	1	1	1	1	1	1	1	1	1	1	1	1	1	1	1	1	1
[truncated: 24 more columns]
