# Supplementary material for: RNA promotes phase separation of glycolysis enzymes into yeast G bodies in hypoxia
Source: eLife. 2020 Apr 16;9:e48480. doi: 10.7554/eLife.48480 (PMC7162659; doi:10.7554/eLife.48480)
Supplement: Figure 4—figure supplement 1—source data 1. [file elife-48480-fig4-figsupp1-data1.xlsx]

## Sheet: Sheet1
Source data for Figure 4 Figure Supplement 1C
		punctae overlapping	punctae not overlapping
	replicate
0 µM	1	326	114
0 µM	2	142	53
5 µM	1	173	49
5 µM	2	79	51
10 µM	1	196	95
10 µM	2	96	57
