# Supplementary material for: RNA promotes phase separation of glycolysis enzymes into yeast G bodies in hypoxia
Source: eLife. 2020 Apr 16;9:e48480. doi: 10.7554/eLife.48480 (PMC7162659; doi:10.7554/eLife.48480)
Supplement: Figure 4—figure supplement 2—source data 1. [file elife-48480-fig4-figsupp2-data1.xlsx]

## Sheet: Sheet1
Source data for Figure 4 Figure Supplement 2A
										unpaired student's T Test
			number of cells				% of cells			p value (Pfk2-RNase A vs. vector for each concentration of CuSO4 comparing % of cells with single foci)
Plasmid	Replicate	[CuSO4]	single foci	multiple foci	no foci	total	single foci	multiple foci	no foci		Bonferroni correction
vector	1	0	414	4	78	496	83.4677	0.806452	15.7258	0.131967	0.659836
vector	2	0	254	1	36	291	87.2852	0.343643	12.3711
vector	1	25	251	1	36	288	87.1528	0.347222	12.5	0.0455719	0.227859
vector	2	25	126	1	21	148	85.1351	0.675676	14.1892
vector	1	50	284	1	72	357	79.5518	0.280112	20.1681	0.0591669	0.295835
vector	2	50	162	0	25	187	86.631	0	13.369
vector	1	75	349	1	95	445	78.427	0.224719	21.3483	0.0529994	0.264997
vector	2	75	111	0	21	132	84.0909	0	15.9091
vector	1	100	241	1	55	297	81.1448	0.3367	18.5185	0.00439943	0.0219972
vector	2	100	288	0	48	336	85.7143	0	14.2857
Pfk2-RNase A	1	0	340	2	180	522	65.1341	0.383142	34.4828
Pfk2-RNase A	2	0	105	0	37	142	73.9437	0	26.0563
Pfk2-RNase A	1	25	195	2	188	385	50.6494	0.519481	48.8312
Pfk2-RNase A	2	25	168	1	125	294	57.1429	0.340136	42.517
Pfk2-RNase A	1	50	94	0	133	227	41.4097	0	58.5903
Pfk2-RNase A	2	50	71	1	60	132	53.7879	0.757576	45.4545
Pfk2-RNase A	1	75	113	0	246	359	31.4763	0	68.5237
Pfk2-RNase A	2	75	97	0	124	221	43.8914	0	56.1086
Pfk2-RNase A	1	100	103	0	205	308	33.4416	0	66.5584
Pfk2-RNase A	2	100	98	0	161	259	37.8378	0	62.1622
