# Supplementary material for: RNA promotes phase separation of glycolysis enzymes into yeast G bodies in hypoxia
Source: eLife. 2020 Apr 16;9:e48480. doi: 10.7554/eLife.48480 (PMC7162659; doi:10.7554/eLife.48480)
Supplement: Figure 4—figure supplement 2—source data 2. [file elife-48480-fig4-figsupp2-data2.xlsx]

## Sheet: Sheet1
Source data for Figure 4 Figure Supplement 2B
										unpaired student's T Test
			number of cells				% of cells			p value (Pfk2-MqsR-Flag % of cells with no foci compared at each concentration of CuSO4)
Plasmid	Replicate	[CuSO4]	single foci	multiple foci	no foci	total	single foci	multiple foci	no foci
vector	1	0	243	0	73	316	76.8987	0	23.1013	0.0261728
vector	2	0	200	1	46	247	80.9717	0.404858	18.6235
vector	3	0	178	0	23	201	88.5572	0	11.4428
vector	1	50	158	0	31	189	83.5979	0	16.4021	0.00425482
vector	2	50	63	0	12	75	84	0	16
vector	3	50	187	0	36	223	83.8565	0	16.1435
vector	1	100	138	1	50	189	73.0159	0.529101	26.455	5.34408e-05
vector	2	100	185	0	50	235	78.7234	0	21.2766
vector	3	100	156	0	43	199	78.392	0	21.608
Pfk2-RNase A H12A	1	0	180	2	94	276	65.2174	0.724638	34.058	0.233587
Pfk2-RNase A H12A	2	0	112	0	74	186	60.2151	0	39.7849
Pfk2-RNase A H12A	3	0	235	0	101	336	69.9405	0	30.0595
Pfk2-RNase A H12A	1	50	147	1	142	290	50.6897	0.344828	48.9655	0.0453976
Pfk2-RNase A H12A	2	50	87	0	128	215	40.4651	0	59.5349
Pfk2-RNase A H12A	3	50	179	0	158	337	53.1157	0	46.8843
Pfk2-RNase A H12A	1	100	268	5	289	562	47.6868	0.88968	51.4235	0.0352182
Pfk2-RNase A H12A	2	100	410	8	676	1094	37.4771	0.731261	61.7916
Pfk2-RNase A H12A	3	100	78	0	125	203	38.4236	0	61.5764
Pfk2-RNase A	1	0	166	2	212	380	43.6842	0.526316	55.7895
Pfk2-RNase A	2	0	123	0	71	194	63.4021	0	36.5979
Pfk2-RNase A	3	0	269	0	190	459	58.6057	0	41.3943
Pfk2-RNase A	1	50	121	0	191	312	38.7821	0	61.2179
Pfk2-RNase A	2	50	177	1	346	524	33.7786	0.19084	66.0305
Pfk2-RNase A	3	50	74	0	197	271	27.3063	0	72.6937
Pfk2-RNase A	1	100	77	0	204	281	27.4021	0	72.5979
Pfk2-RNase A	2	100	94	2	284	380	24.7368	0.526316	74.7368
Pfk2-RNase A	3	100	50	0	120	170	29.4118	0	70.5882
