# Supplementary material for: RNA promotes phase separation of glycolysis enzymes into yeast G bodies in hypoxia
Source: eLife. 2020 Apr 16;9:e48480. doi: 10.7554/eLife.48480 (PMC7162659; doi:10.7554/eLife.48480)
Supplement: Figure 4—figure supplement 3—source data 1. [file elife-48480-fig4-figsupp3-data1.xlsx]

## Sheet: Sheet1
Source data for Figure 4 Figure Supplement 3A
										unpaired student's T Test
			number of cells				% of cells			p value (Pfk2-RNase A vs. vector for each concentration of CuSO4 comparing % of cells with single foci)
Plasmid	Replicate	[CuSO4]	single foci	multiple foci	no foci	total	single foci	multiple foci	no foci
vector	0	144	0	125	269	394	53.5316	0	46.4684	0.376122
vector	0	120	0	95	215	310	55.814	0	44.186
vector	0	265	0	291	556	847	47.6619	0	52.3381
vector	50	292	0	233	525	758	55.619	0	44.381	0.0151227
vector	50	234	0	173	407	580	57.4939	0	42.5061
vector	50	107	0	83	190	273	56.3158	0	43.6842
vector	100	282	1	379	662	1042	42.5982	0.151057	57.2508	0.0483878
vector	100	188	0	150	338	488	55.6213	0	44.3787
vector	100	157	0	111	268	379	58.5821	0	41.4179
Pfk2-RNase A	0	159	1	189	349	539	45.5587	0.286533	54.1547
Pfk2-RNase A	0	119	0	97	216	313	55.0926	0	44.9074
Pfk2-RNase A	0	81	0	108	189	297	42.8571	0	57.1429
Pfk2-RNase A	50	172	0	271	443	714	38.8262	0	61.1738
Pfk2-RNase A	50	150	0	177	327	504	45.8716	0	54.1284
Pfk2-RNase A	50	91	0	132	223	355	40.8072	0	59.1928
Pfk2-RNase A	100	83	0	199	282	481	29.4326	0	70.5674
Pfk2-RNase A	100	95	0	165	260	425	36.5385	0	63.4615
Pfk2-RNase A	100	119	0	201	320	521	37.1875	0	62.8125
