# Supplementary material for: RNA promotes phase separation of glycolysis enzymes into yeast G bodies in hypoxia
Source: eLife. 2020 Apr 16;9:e48480. doi: 10.7554/eLife.48480 (PMC7162659; doi:10.7554/eLife.48480)
Supplement: Figure 4—figure supplement 3—source data 2. [file elife-48480-fig4-figsupp3-data2.xlsx]

## Sheet: Sheet1
Source data for Figure 4 Figure Supplement 3B
										unpaired student's T Test
			number of cells				% of cells			p value (Pfk2-RNase A vs. vector for each concentration of CuSO4 comparing % of cells with single foci)
Plasmid	Replicate	[CuSO4]	single foci	multiple foci	no foci	total	single foci	multiple foci	no foci
vector	1	0	115	0	97	212	54.2453	0	45.7547	0.075871
vector	2	0	119	2	87	208	57.2115	0.961538	41.8269
vector	3	0	128	0	96	224	57.1429	0	42.8571
vector	4	0	154	4	82	240	64.1667	1.66667	34.1667
vector	1	50	210	0	161	371	56.6038	0	43.3962	0.0012463
vector	2	50	280	3	179	462	60.6061	0.649351	38.7446
vector	3	50	129	0	72	201	64.1791	0	35.8209
vector	4	50	211	4	114	329	64.1337	1.21581	34.6505
vector	1	100	149	2	104	255	58.4314	0.784314	40.7843	0.0134698
vector	2	100	139	2	101	242	57.438	0.826446	41.7355
vector	3	100	130	1	70	201	64.6766	0.497512	34.8259
vector	4	100	259	2	131	392	66.0714	0.510204	33.4184
Pfk2-RNase A	1	0	244	5	176	425	57.4118	1.17647	41.4118
Pfk2-RNase A	2	0	137	1	138	276	49.6377	0.362319	50
Pfk2-RNase A	3	0	198	0	196	394	50.2538	0	49.7462
Pfk2-RNase A	4	0	121	5	108	234	51.7094	2.13675	46.1538
Pfk2-RNase A	1	50	135	1	141	277	48.7365	0.361011	50.9025
Pfk2-RNase A	2	50	69	0	95	164	42.0732	0	57.9268
Pfk2-RNase A	3	50	153	1	180	334	45.8084	0.299401	53.8922
Pfk2-RNase A	4	50	199	6	190	395	50.3797	1.51899	48.1013
Pfk2-RNase A	1	100	137	1	138	276	49.6377	0.362319	50
Pfk2-RNase A	2	100	53	3	107	163	32.5153	1.84049	65.6442
Pfk2-RNase A	3	100	119	0	163	282	42.1986	0	57.8014
Pfk2-RNase A	4	100	193	5	189	387	49.8708	1.29199	48.8372
