# Supplementary material for: RNA promotes phase separation of glycolysis enzymes into yeast G bodies in hypoxia
Source: eLife. 2020 Apr 16;9:e48480. doi: 10.7554/eLife.48480 (PMC7162659; doi:10.7554/eLife.48480)
Supplement: Figure 4—figure supplement 3—source data 3. [file elife-48480-fig4-figsupp3-data3.xlsx]

## Sheet: Sheet1
Source data for Figure 4 Figure Supplement 3C
										unpaired student's T Test
			number of cells				% of cells			p value (Pfk2-RNase A vs. vector for each concentration of CuSO4 comparing % of cells with single foci)
Plasmid	Replicate	[CuSO4]	single foci	multiple foci	no foci	total	single foci	multiple foci	no foci
vector	1	0	129	0	91	220	58.6364	0	41.3636	0.255726
vector	2	0	156	0	200	356	43.8202	0	56.1798
vector	3	0	320	0	352	672	47.619	0	52.381
vector	1	50	243	0	170	413	58.8378	0	41.1622	0.0992688
vector	2	50	76	0	111	187	40.6417	0	59.3583
vector	3	50	198	0	217	415	47.7108	0	52.2892
vector	1	100	203	0	167	370	54.8649	0	45.1351	0.040768
vector	2	100	89	0	158	247	36.0324	0	63.9676
vector	3	100	128	0	150	278	46.0432	0	53.9568
Pfk2-RNase A	1	0	137	0	96	233	58.7983	0	41.2017
Pfk2-RNase A	2	0	169	0	239	408	41.4216	0	58.5784
Pfk2-RNase A	3	0	127	0	315	442	28.733	0	71.267
Pfk2-RNase A	1	50	152	0	169	321	47.352	0	52.648
Pfk2-RNase A	2	50	163	0	301	464	35.1293	0	64.8707
Pfk2-RNase A	3	50	43	0	225	268	16.0448	0	83.9552
Pfk2-RNase A	1	100	89	0	159	248	35.8871	0	64.1129
Pfk2-RNase A	2	100	121	0	321	442	27.3756	0	72.6244
Pfk2-RNase A	3	100	47	0	99	146	32.1918	0	67.8082
