# Supplementary material for: RNA promotes phase separation of glycolysis enzymes into yeast G bodies in hypoxia
Source: eLife. 2020 Apr 16;9:e48480. doi: 10.7554/eLife.48480 (PMC7162659; doi:10.7554/eLife.48480)
Supplement: Figure 4—source data 1. [file elife-48480-fig4-data1.xlsx]

## Sheet: Sheet1
Source data for Figure 4B.										unpaired student's T Test
			number of cells				% of cells			p value (Pfk2-MqsR-Flag vs. vector for each concentration of CuSO4 comparing % of cells with single foci)
Plasmid	[CuSO4]	Replicate	single foci	multiple foci	no foci	total	single foci	multiple foci	no foci		Bonferroni correction
vector	0	1	309	11	129	449	68.8196	2.44989	28.7305	0.030615	0.153075
vector	0	2	268	3	61	332	80.7229	0.903614	18.3735
vector	0	3	337	2	58	397	84.8866	0.503778	14.6096
vector	25	1	210	7	85	302	69.5364	2.31788	28.1457	0.00105792	0.00528959
vector	25	2	238	4	69	311	76.5273	1.28617	22.1865
vector	25	3	423	6	98	527	80.2657	1.13852	18.5958
vector	50	1	184	6	139	329	55.9271	1.82371	42.2492	0.151267	0.756337
vector	50	2	587	7	95	689	85.1959	1.01597	13.7881
vector	50	3	250	2	138	390	64.1026	0.512821	35.3846
vector	75	1	146	5	95	246	59.3496	2.03252	38.6179	0.00963806	0.0481903
vector	75	2	205	5	71	281	72.9537	1.77936	25.2669
vector	75	3	381	2	79	462	82.4675	0.4329	17.0996
vector	100	1	113	1	54	168	67.2619	0.595238	32.1429	0.00162106	0.00810529
vector	100	2	195	2	38	235	82.9787	0.851064	16.1702
vector	100	3	323	0	95	418	77.2727	0	22.7273
Pfk2-MqsR-Flag	0	1	216	3	157	376	57.4468	0.797872	41.7553
Pfk2-MqsR-Flag	0	2	266	3	238	507	52.4655	0.591716	46.9428
Pfk2-MqsR-Flag	0	3	142	0	82	224	63.3929	0	36.6071
Pfk2-MqsR-Flag	25	1	75	4	270	349	21.49	1.14613	77.3639
Pfk2-MqsR-Flag	25	2	57	3	259	319	17.8683	0.940439	81.1912
Pfk2-MqsR-Flag	25	3	91	0	419	510	17.8431	0	82.1569
Pfk2-MqsR-Flag	50	1	33	1	262	296	11.1486	0.337838	88.5135
Pfk2-MqsR-Flag	50	2	155	2	203	360	43.0556	0.555556	56.3889
Pfk2-MqsR-Flag	50	3	322	0	224	546	58.9744	0	41.0256
Pfk2-MqsR-Flag	75	1	21	1	218	240	8.75	0.416667	90.8333
Pfk2-MqsR-Flag	75	2	43	2	299	344	12.5	0.581395	86.9186
Pfk2-MqsR-Flag	75	3	63	0	400	463	13.6069	0	86.3931
Pfk2-MqsR-Flag	100	1	12	0	139	151	7.94702	0	92.053
Pfk2-MqsR-Flag	100	2	29	0	189	218	13.3028	0	86.6972
Pfk2-MqsR-Flag	100	3	49	0	290	339	14.4543	0	85.5457
