# Supplementary material for: RNA promotes phase separation of glycolysis enzymes into yeast G bodies in hypoxia
Source: eLife. 2020 Apr 16;9:e48480. doi: 10.7554/eLife.48480 (PMC7162659; doi:10.7554/eLife.48480)
Supplement: Figure 4—source data 2. [file elife-48480-fig4-data2.xlsx]

## Sheet: Sheet1
Source Data for Figure 4C
										unpaired student's T Test
			number of cells				% of cells			p value (Pfk2-MqsR-Flag % of cells with no foci compared at each concentration of CuSO4)
Plasmid	Replicate	[CuSO4]	single foci	multiple foci	no foci	total	single foci	multiple foci	no foci		Bonferroni correction
vector	1	0	327	5	53	385	84.9351	1.2987	13.7662	0.0249368	0.0997474
vector	2	0	216	4	34	254	85.0394	1.5748	13.3858
vector	3	0	340	3	52	395	86.0759	0.759494	13.1646
vector	4	0	60	0	39	99	60.6061	0	39.3939
vector	1	50	165	2	40	207	79.7101	0.966184	19.3237	0.00212982	0.00851928
vector	2	50	128	2	27	157	81.5287	1.27389	17.1975
vector	3	50	399	2	101	502	79.4821	0.398406	20.1195
vector	4	50	129	1	103	233	55.3648	0.429185	44.206
Pfk2-MqsR-Flag-MqsA	1	0	245	6	27	278	88.1295	2.15827	9.71223	0.00979479	0.0391792
Pfk2-MqsR-Flag-MqsA	2	0	151	6	23	180	83.8889	3.33333	12.7778
Pfk2-MqsR-Flag-MqsA	3	0	236	9	22	267	88.3895	3.37079	8.2397
Pfk2-MqsR-Flag-MqsA	4	0	125	9	51	185	67.5676	4.86486	27.5676
Pfk2-MqsR-Flag-MqsA	1	50	232	12	55	299	77.592	4.01338	18.3946	0.000123211	0.000492842
Pfk2-MqsR-Flag-MqsA	2	50	148	8	44	200	74	4	22
Pfk2-MqsR-Flag-MqsA	3	50	259	29	46	334	77.5449	8.68263	13.7725
Pfk2-MqsR-Flag-MqsA	4	50	84	5	46	135	62.2222	3.7037	34.0741
Pfk2-MqsR-Flag	1	0	179	0	157	336	53.2738	0	46.7262
Pfk2-MqsR-Flag	2	0	172	0	110	282	60.9929	0	39.0071
Pfk2-MqsR-Flag	3	0	95	1	52	148	64.1892	0.675676	35.1351
Pfk2-MqsR-Flag	4	0	145	5	215	365	39.726	1.36986	58.9041
Pfk2-MqsR-Flag	1	50	61	0	215	276	22.1014	0	77.8986
Pfk2-MqsR-Flag	2	50	62	0	229	291	21.3058	0	78.6942
Pfk2-MqsR-Flag	3	50	81	0	249	330	24.5455	0	75.4545
Pfk2-MqsR-Flag	4	50	28	1	146	175	16	0.571429	83.4286
