# Supplementary material for: RNA promotes phase separation of glycolysis enzymes into yeast G bodies in hypoxia
Source: eLife. 2020 Apr 16;9:e48480. doi: 10.7554/eLife.48480 (PMC7162659; doi:10.7554/eLife.48480)
Supplement: Figure 4—source data 3. [file elife-48480-fig4-data3.xlsx]

## Sheet: Sheet1
Source data for Figure 4D.
										unpaired student's T Test
			number of cells				% of cells			p value (Pfk2-MqsR-Flag % of cells with no foci compared at each concentration of CuSO4)
Plasmid	Replicate	[CuSO4]	single foci	multiple foci	no foci	total	single foci	multiple foci	no foci		Bonferroni correction
vector	1	0	218	10	67	295	73.8983	3.38983	22.7119	0.00140616	0.00562465
vector	2	0	254	2	102	358	70.9497	0.558659	28.4916
vector	3	0	180	6	69	255	70.5882	2.35294	27.0588
vector	1	50	166	7	58	231	71.8615	3.0303	25.1082	0.00673737	0.0269495
vector	2	50	387	12	140	539	71.7996	2.22635	25.974
vector	3	50	180	7	40	227	79.2952	3.0837	17.6211
MqsR-Flag	1	0	181	3	71	255	70.9804	1.17647	27.8431	0.0030988	0.0123952
MqsR-Flag	2	0	137	1	51	189	72.4868	0.529101	26.9841
MqsR-Flag	3	0	212	11	67	290	73.1034	3.7931	23.1034
MqsR-Flag	1	50	102	1	46	149	68.4564	0.671141	30.8725	0.00970833	0.0388333
MqsR-Flag	2	50	177	2	77	256	69.1406	0.78125	30.0781
MqsR-Flag	3	50	184	7	54	245	75.102	2.85714	22.0408
Pfk2-MqsR-Flag	1	0	185	0	163	348	53.1609	0	46.8391
Pfk2-MqsR-Flag	2	0	74	2	60	136	54.4118	1.47059	44.1176
Pfk2-MqsR-Flag	3	0	160	1	114	275	58.1818	0.363636	41.4545
Pfk2-MqsR-Flag	1	50	127	5	199	331	38.3686	1.51057	60.1208
Pfk2-MqsR-Flag	2	50	79	1	305	385	20.5195	0.25974	79.2208
Pfk2-MqsR-Flag	3	50	54	0	196	250	21.6	0	78.4
