# Supplementary material for: RNA promotes phase separation of glycolysis enzymes into yeast G bodies in hypoxia
Source: eLife. 2020 Apr 16;9:e48480. doi: 10.7554/eLife.48480 (PMC7162659; doi:10.7554/eLife.48480)
Supplement: Figure 5—source data 1. [file elife-48480-fig5-data1.xlsx]

## Sheet: Sheet1
Source data for Figure 5B
			number of cells				% of cells			unpaired student's T Test
Plasmid	Replicate	[CuSO4]	single foci	multiple foci	no foci	total	single foci	multiple foci	no foci	p value comparing % of cells with single foci
vector	1	0	524	13	142	679	78.1397	1.94831	19.912	0.00138022
vector	2	0	510	9	112	631	80.8075	1.46339	17.7291
vector	3	0	353	9	60	422	84.2011	2.0272	13.7717
Pfk2-MqsR-Flag	1	0	568	8	367	943	60.0645	1.1396	38.7959
Pfk2-MqsR-Flag	2	0	319	0	183	502	63.8916	0	36.1084
Pfk2-MqsR-Flag	3	0	426	8	260	694	60.6355	1.23167	38.1328
