# Supplementary material for: RNA promotes phase separation of glycolysis enzymes into yeast G bodies in hypoxia
Source: eLife. 2020 Apr 16;9:e48480. doi: 10.7554/eLife.48480 (PMC7162659; doi:10.7554/eLife.48480)
Supplement: Figure 5—source data 2. [file elife-48480-fig5-data2.xlsx]

## Sheet: Sheet1
Source data for Figure 5E
										unpaired student's T Test
			number of cells				% of cells			p value comparing % of cells with multiple foci at each concentration of CuSO4 between vector and Pfk2-MqsR-Flag
Plasmid	Replicate	[CuSO4]	single foci	multiple foci	no foci	total	single foci	multiple foci	no foci		Bonferroni correction
vector	1	100	118	1	251	370	31.8919	0.27027	67.8378	0.00260017	0.00780051
vector	2	100	98	0	74	172	56.9767	0	43.0233
vector	3	100	108	1	101	210	51.4286	0.47619	48.0952
vector	1	25	106	0	169	275	38.5455	0	61.4545	7.8715e-05	0.000236145
vector	2	25	144	0	99	243	59.2593	0	40.7407
vector	3	25	131	0	84	215	60.9302	0	39.0698
vector	1	5	178	0	126	304	58.5526	0	41.4474	0.00125376	0.00376128
vector	2	5	111	0	115	226	49.115	0	50.885
vector	3	5	112	1	158	271	41.3284	0.369004	58.3026
Pfk2-MqsR-Flag	1	100	72	135	49	256	28.125	52.7344	19.1406
Pfk2-MqsR-Flag	2	100	75	137	53	265	28.3019	51.6981	20
Pfk2-MqsR-Flag	3	100	49	95	69	213	23.0047	44.6009	32.3944
Pfk2-MqsR-Flag	1	25	94	138	96	328	28.6585	42.0732	29.2683
Pfk2-MqsR-Flag	2	25	76	95	48	219	34.7032	43.379	21.9178
Pfk2-MqsR-Flag	3	25	70	78	34	182	38.4615	42.8571	18.6813
Pfk2-MqsR-Flag	1	5	68	100	79	247	27.5304	40.4858	31.9838
Pfk2-MqsR-Flag	2	5	105	112	63	280	37.5	40	22.5
Pfk2-MqsR-Flag	3	5	31	43	22	96	32.2917	44.7917	22.9167
