# Supplementary material for: RNA promotes phase separation of glycolysis enzymes into yeast G bodies in hypoxia
Source: eLife. 2020 Apr 16;9:e48480. doi: 10.7554/eLife.48480 (PMC7162659; doi:10.7554/eLife.48480)
Supplement: Figure 6—source data 1. [file elife-48480-fig6-data1.xlsx]

## Sheet: Sheet1
Source data for figure 5C
		number of cells				% of cells			unpaired student's T Test
genotype	replicate	single foci	multiple foci	no foci	total	single foci	multiple foci	no foci	p value compairing % of cells with single foci to wt
wt	1	97	1	9	107	90.6542	0.934579	8.41121
wt	2	125	0	13	138	90.5797	0	9.42029
wt	3	148	1	25	174	85.0575	0.574713	14.3678
∆1-202	1	10	3	110	123	8.13008	2.43902	89.4309	9.32632e-06
∆1-202	2	13	26	125	164	7.92683	15.8537	76.2195
∆1-202	3	5	19	99	123	4.06504	15.4472	80.4878
∆140-165	1	74	10	15	99	74.7475	10.101	15.1515	0.0351097
∆140-165	2	105	25	36	166	63.253	15.0602	21.6867
∆140-165	3	109	26	8	143	76.2238	18.1818	5.59441
