# Supplementary material for: RNA promotes phase separation of glycolysis enzymes into yeast G bodies in hypoxia
Source: eLife. 2020 Apr 16;9:e48480. doi: 10.7554/eLife.48480 (PMC7162659; doi:10.7554/eLife.48480)
Supplement: Figure 6—source data 2. [file elife-48480-fig6-data2.xlsx]

## Sheet: Sheet1
Source Data for Figure 6D
		number of cells				% of cells			unpaired student's T Test
genotype	replicate	single foci	multiple foci	no foci	total	single foci	multiple foci	no foci	p value compairing % of cells with single foci to wt
wt	1	81	1	43	125	64.8	0.8	34.4
wt	2	294	1	49	344	85.4651	0.290698	14.2442
plasmid 1-202-GFP	1	274	37	68	379	72.2955	9.76253	17.942	0.828468
plasmid 1-202-GFP	2	99	1	37	137	72.2628	0.729927	27.0073
integrated 1-202-GFP	1	0	0	193	193	0	0	100	0.0840841
integrated 1-202-GFP	2	3	0	108	111	2.7027	0	97.2973
