# Supplementary material for: RNA promotes phase separation of glycolysis enzymes into yeast G bodies in hypoxia
Source: eLife. 2020 Apr 16;9:e48480. doi: 10.7554/eLife.48480 (PMC7162659; doi:10.7554/eLife.48480)
Supplement: Figure 6—source data 3. [file elife-48480-fig6-data3.xlsx]

## Sheet: Sheet1
Source data for figure 6E
		number of cells				% of cells			unpaired student's T Test
genotype	replicate	single foci	multiple foci	no foci	total	single foci	multiple foci	no foci	p value comparing % of cells with signle foci
pfk2∆	1	28	1	179	208	13.4615	0.480769	86.0577	0.0379097
pfk2∆	2	52	10	238	300	17.3333	3.33333	79.3333
pfk2∆	3	46	0	196	242	19.0083	0	80.9917
wt	1	155	2	273	430	36.0465	0.465116	63.4884
wt	2	76	1	163	240	31.6667	0.416667	67.9167
wt	3	67	0	71	138	48.5507	0	51.4493
