# Supplementary material for: RNA promotes phase separation of glycolysis enzymes into yeast G bodies in hypoxia
Source: eLife. 2020 Apr 16;9:e48480. doi: 10.7554/eLife.48480 (PMC7162659; doi:10.7554/eLife.48480)
Supplement: Figure 7—figure supplement 1—source data 1. [file elife-48480-fig7-figsupp1-data1.xlsx]

## Sheet: Sheet1
Source data for Figure 7 Figure Supplement 1A
										unpaired student's T Test
			number of cells				% of cells			p value comparing % of cells with single foci pre-1,6 hexanediol treatment to treatment with 1,6 hexanediol
Genotype	condition	replicate	single foci	multiple foci	no foci	total	single foci	multiple foci	no foci
wt	pre-1,6 hexanediol	1	223	0	45	268	83.209	0	16.791
wt	pre-1,6 hexanediol	2	114	0	22	136	83.8235	0	16.1765
wt	pre-1,6 hexanediol	3	282	0	54	336	83.9286	0	16.0714
wt	0% 1,6 hexanediol	1	100	0	37	137	72.9927	0	27.0073	0.015038
wt	0% 1,6 hexanediol	2	87	3	40	130	66.9231	2.30769	30.7692
wt	0% 1,6 hexanediol	3	92	1	38	131	70.229	0.763359	29.0076
wt	5% 1,6 hexanediol	1	97	2	17	116	83.6207	1.72414	14.6552	0.808278
wt	5% 1,6 hexanediol	2	104	2	21	127	81.8898	1.5748	16.5354
wt	5% 1,6 hexanediol	3	168	1	25	194	86.5979	0.515464	12.8866
