# Supplementary material for: RNA promotes phase separation of glycolysis enzymes into yeast G bodies in hypoxia
Source: eLife. 2020 Apr 16;9:e48480. doi: 10.7554/eLife.48480 (PMC7162659; doi:10.7554/eLife.48480)
Supplement: Figure 7—figure supplement 1—source data 2. [file elife-48480-fig7-figsupp1-data2.xlsx]

## Sheet: Sheet1
Source data for Figure 7 Figure Supplement 1B
								unpaired student's T Test
			number of cells			% of cells		p value comparing % of cells with no foci between starvation and 1,6 hexanediol treatment
Genotype	condition	replicate	foci	no foci	total	foci	no foci
EDC3-GFP	starvation	1	137	4	141	97.1631	2.83688
EDC3-GFP	starvation	2	134	5	139	96.4029	3.59712
EDC3-GFP	starvation	3	163	19	182	89.5604	10.4396
EDC3-GFP	0% 1,6 hexanediol	1	105	0	105	100	0	0.178905
EDC3-GFP	0% 1,6 hexanediol	2	128	1	129	99.2248	0.775194
EDC3-GFP	0% 1,6 hexanediol	3	64	1	65	98.4615	1.53846
EDC3-GFP	5% 1,6 hexanediol	1	70	16	86	81.3953	18.6047	0.0445424
EDC3-GFP	5% 1,6 hexanediol	2	93	28	121	76.8595	23.1405
EDC3-GFP	5% 1,6 hexanediol	3	91	52	143	63.6364	36.3636
PAB1-GFP	starvation	1	182	11	193	94.3005	5.69948
PAB1-GFP	starvation	2	140	0	140	100	0
PAB1-GFP	starvation	3	194	0	194	100	0
PAB1-GFP	0% 1,6 hexanediol	1	123	14	137	89.781	10.219	0.608642
PAB1-GFP	0% 1,6 hexanediol	2	285	5	290	98.2759	1.72414
PAB1-GFP	0% 1,6 hexanediol	3	133	0	133	100	0
PAB1-GFP	5% 1,6 hexanediol	1	67	9	76	88.1579	11.8421	0.0502072
PAB1-GFP	5% 1,6 hexanediol	2	97	21	118	82.2034	17.7966
PAB1-GFP	5% 1,6 hexanediol	3	98	8	106	92.4528	7.54717
