# Supplementary material for: RNA promotes phase separation of glycolysis enzymes into yeast G bodies in hypoxia
Source: eLife. 2020 Apr 16;9:e48480. doi: 10.7554/eLife.48480 (PMC7162659; doi:10.7554/eLife.48480)
Supplement: Figure 7—figure supplement 1—source data 3. [file elife-48480-fig7-figsupp1-data3.xlsx]

## Sheet: Sheet1
Figure 7 Figure Supplement 1C
								unpaired student's T Test
			number of cells			% of cells		p value comparing % of cells with no foci between 1,6 hexanediol treatment and no treatment
Genotype	condition	replicate	foci	no foci	total	foci	multiple foci
EDC3-GFP	0% 1,6 hexanediol	1	137	4	141	97.1631	2.83688	0.00184313
EDC3-GFP	0% 1,6 hexanediol	2	134	5	139	96.4029	3.59712
EDC3-GFP	0% 1,6 hexanediol	3	163	19	182	89.5604	10.4396
EDC3-GFP	5% 1,6 hexanediol	1	102	118	220	46.3636	53.6364
EDC3-GFP	5% 1,6 hexanediol	2	43	77	120	35.8333	64.1667
EDC3-GFP	5% 1,6 hexanediol	3	79	77	156	50.641	49.359
PAB1-GFP	0% 1,6 hexanediol	1	182	11	193	94.3005	5.69948	0.213453
PAB1-GFP	0% 1,6 hexanediol	2	140	0	140	100	0
PAB1-GFP	0% 1,6 hexanediol	3	194	0	194	100	0
PAB1-GFP	5% 1,6 hexanediol	1	108	0	108	100	0
PAB1-GFP	5% 1,6 hexanediol	2	247	146	393	62.8499	37.1501
PAB1-GFP	5% 1,6 hexanediol	3	610	248	858	71.0956	28.9044
