# Supplementary material for: RNA promotes phase separation of glycolysis enzymes into yeast G bodies in hypoxia
Source: eLife. 2020 Apr 16;9:e48480. doi: 10.7554/eLife.48480 (PMC7162659; doi:10.7554/eLife.48480)
Supplement: Figure 7—figure supplement 1—source data 4. [file elife-48480-fig7-figsupp1-data4.xlsx]

## Sheet: Sheet1
Figure 7 Figure Supplement 1D
										unpaired student's T Test
			number of cells				% of cells			p value comparing % of cells with multiple foci in 1,6 hexanediol treatment to no treatment
Genotype	condition	replicate	single foci	multiple foci	no foci	total	single foci	multiple foci	no foci
wt	0% 1,6 hexanediol	1	405	0	17	422	95.9716	0	4.02844
wt	0% 1,6 hexanediol	2	223	0	45	268	83.209	0	16.791
wt	0% 1,6 hexanediol	3	114	0	22	136	83.8235	0	16.1765
wt	1% 1,6 hexanediol	1	187	1	13	201	93.0348	0.497512	6.46766	0.215609
wt	1% 1,6 hexanediol	2	148	1	7	156	94.8718	0.641026	4.48718
wt	1% 1,6 hexanediol	3	99	3	8	110	90	2.72727	7.27273
wt	2% 1,6 hexanediol	1	134	0	14	148	90.5405	0	9.45946	0.221208
wt	2% 1,6 hexanediol	2	165	3	18	186	88.7097	1.6129	9.67742
wt	2% 1,6 hexanediol	3	107	1	11	119	89.916	0.840336	9.2437
snf1∆	0% 1,6 hexanediol	1	78	26	17	121	64.4628	21.4876	14.0496
snf1∆	0% 1,6 hexanediol	2	39	50	32	121	32.2314	41.3223	26.4463
snf1∆	0% 1,6 hexanediol	3	61	73	46	180	33.8889	40.5556	25.5556
snf1∆	1% 1,6 hexanediol	1	113	7	5	125	90.4	5.6	4	0.0295814
snf1∆	1% 1,6 hexanediol	2	105	0	8	113	92.9204	0	7.07965
snf1∆	1% 1,6 hexanediol	3	90	0	10	100	90	0	10
snf1∆	2% 1,6 hexanediol	1	154	44	17	215	71.6279	20.4651	7.90698	0.0635086
snf1∆	2% 1,6 hexanediol	2	119	24	17	160	74.375	15	10.625
snf1∆	2% 1,6 hexanediol	3	166	9	21	196	84.6939	4.59184	10.7143
