# Supplementary material for: RNA promotes phase separation of glycolysis enzymes into yeast G bodies in hypoxia
Source: eLife. 2020 Apr 16;9:e48480. doi: 10.7554/eLife.48480 (PMC7162659; doi:10.7554/eLife.48480)
Supplement: Figure 7—figure supplement 2—source data 1. [file elife-48480-fig7-figsupp2-data1.xlsx]

## Sheet: Sheet1
		# of cells	t – 1	t 0	t 1	t 2	t 3	t 4	t 5	t 6	t 7	t 8	t 9	t 10	t 11	t 12	t 13	t 14	t 15	t 16	t 17	t 18	t 19	t 20	t 21	t 22	t 23	t 24	t 25	t 26	t 27	t 28	t 29	t 30	t 31	t 32	t 33	t 34	t 35	t 36	t 37	t 38	t 39
Pfk2-GFP (YPD)	average	65	0.994201	0.0812691	0.0957649	0.0945096	0.0952371	0.0959001	0.0935653	0.0946009	0.0967198	0.104874	0.116072	0.122131	0.124335	0.123682	0.124333	0.119281	0.128954	0.149674	0.153793	0.141503	0.159325	0.159353	0.148557	0.158022	0.166492	0.15865	0.166132	0.16249	0.169667	0.150729	0.157403	0.161815	0.162534	0.164766	0.145221	0.133363	0.147036	0.136872	0.154527	0.140427	0.0818584
	standard error	65	0.00579903	0.0103078	0.00958671	0.0106281	0.0110987	0.00981527	0.00935337	0.0101718	0.0094079	0.00858061	0.0102102	0.0107486	0.0131479	0.0119067	0.011017	0.00920831	0.0117053	0.0175577	0.0175347	0.0152602	0.0179243	0.0210922	0.0179529	0.0195656	0.0211347	0.0192382	0.0231673	0.0241684	0.0231735	0.0175206	0.0173588	0.0215297	0.021204	0.0221155	0.0189476	0.0208211	0.0213269	0.0210387	0.0241566	0.02554	0.0283508
Pfk2-GFP (SMD)	average	69	0.994055	0.0602854	0.0704621	0.0765968	0.0711325	0.073981	0.0723134	0.0730198	0.0761569	0.0788668	0.0813806	0.0815498	0.0675702	0.0823692	0.0870476	0.0863978	0.0802575	0.0837586	0.0838416	0.0821339	0.0902247	0.0940585	0.0928201	0.0991587	0.100947	0.0917913	0.0957712	0.109029	0.110908	0.104528	0.116797	0.117703	0.117966	0.114636	0.113759	0.110162	0.117076	0.0995551	0.115034	0.10893	0.0426702
	standard error	69	0.00468782	0.0066942	0.00815412	0.00739374	0.00706359	0.00757225	0.00633804	0.00555551	0.00572073	0.00645054	0.00631648	0.00654642	0.00598508	0.00654267	0.00696793	0.010417	0.00781532	0.0102555	0.00847757	0.00781205	0.00869673	0.00895126	0.00912069	0.0115628	0.0107201	0.0110214	0.0103037	0.0127967	0.0183534	0.0129091	0.0132586	0.0181146	0.0154076	0.016705	0.0138067	0.0139604	0.0140956	0.0122403	0.0116164	0.011992	0.0149786
Fba1-GFP	average	95	0.991762	0.0560026	0.073383	0.0846313	0.0843607	0.088262	0.0984387	0.100364	0.109374	0.118439	0.122852	0.124127	0.135633	0.12794	0.133773	0.138458	0.141028	0.140906	0.138819	0.161967	0.165919	0.173338	0.171818	0.178356	0.179134	0.182114	0.191053	0.194011	0.195856	0.201316	0.20202	0.20513	0.209792	0.216668	0.217941	0.208093	0.207762	0.217984	0.232486	0.215826	0.159824
	standard error	95	0.0063891	0.0088477	0.007806	0.00737882	0.00680367	0.00656625	0.00679809	0.00617442	0.00701743	0.00714826	0.00773015	0.00799499	0.008557	0.00746954	0.00855402	0.00891969	0.00875889	0.00923117	0.00922166	0.0105919	0.0114298	0.0141894	0.0116036	0.0121192	0.0122652	0.0123855	0.0125841	0.0131224	0.0131956	0.013704	0.0143158	0.0148192	0.0146664	0.0148947	0.0152448	0.015351	0.015331	0.015531	0.0180072	0.0171533	0.0221775
Eno2-GFP	average	47	0.962727	0.0942309	0.129092	0.1179	0.130463	0.134437	0.138341	0.138188	0.126665	0.128594	0.139729	0.14841	0.129511	0.144213	0.150237	0.136613	0.151552	0.156922	0.160169	0.189447	0.201503	0.177538	0.204881	0.197573	0.221085	0.229387	0.240916	0.225052	0.270956	0.236511	0.226641	0.235252	0.284377	0.280348	0.266702	0.268551	0.260681	0.255945	0.316532	0.352986	0.258755
	standard error	47	0.0184078	0.0149893	0.0184378	0.0109238	0.0141871	0.0171781	0.0178606	0.0155609	0.0133714	0.0116807	0.0128236	0.0190225	0.0175192	0.0211426	0.0194252	0.0187332	0.023864	0.0243168	0.0224619	0.0240705	0.0245813	0.025039	0.024913	0.0253277	0.024633	0.0282947	0.0309273	0.0290926	0.0344461	0.0276447	0.0272319	0.0281423	0.0391212	0.0298266	0.0275942	0.0306434	0.0276121	0.028566	0.0370756	0.0405434	0.0494262
Pfk2D348S-MqsR-Flag	average	45	0.956002	0.0813057	0.106382	0.124349	0.123122	0.107628	0.117457	0.121947	0.118177	0.121597	0.139279	0.138301	0.154272	0.155856	0.138739	0.150523	0.161324	0.145085	0.153278	0.150835	0.140854	0.18783	0.171297	0.190908	0.168136	0.144309	0.167203	0.160382	0.165332	0.134478	0.157869	0.150195	0.155257	0.156338	0.173469	0.18544	0.174422	0.170472	0.175136	0.162819	0.0815133
	standard error	45	0.0268391	0.0200883	0.0238463	0.0268264	0.0245231	0.0209444	0.0211226	0.0225347	0.0242171	0.0198594	0.0261932	0.0237601	0.0268944	0.0261617	0.0235989	0.0258221	0.0274023	0.0236853	0.0230994	0.0211909	0.0227535	0.0351214	0.0251552	0.0308684	0.0286063	0.0220745	0.0259933	0.0216855	0.0214951	0.0211204	0.0247112	0.0211588	0.0244739	0.024071	0.0274922	0.0349748	0.0287315	0.0262644	0.0271586	0.0290248	0.0234185
vector	average	36	0.940807	0.066378	0.0722067	0.0799344	0.0843883	0.0877425	0.0874825	0.0741668	0.0992357	0.091033	0.0928789	0.0989214	0.0893684	0.0933437	0.0863943	0.098001	0.0967171	0.0950361	0.110534	0.0881574	0.0918832	0.0877092	0.0939956	0.0898751	0.137946	0.152279	0.181074	0.145493	0.135085	0.128499	0.15936	0.112248	0.102417	0.125533	0.108965	0.0956573	0.148449	0.118487	0.0893716	0.124753	0.0583753
	standard error	36	0.0334378	0.0115226	0.0110345	0.0133472	0.0130754	0.0143101	0.0142854	0.0109617	0.0140335	0.0116162	0.0133882	0.0153464	0.012629	0.0130677	0.0127549	0.0148677	0.0123845	0.0117102	0.0139781	0.011454	0.0122306	0.0122714	0.0110477	0.0108654	0.0362207	0.0332414	0.0414941	0.0312077	0.0239461	0.0280466	0.0342747	0.0167924	0.0160501	0.0222186	0.0212034	0.0166827	0.0356266	0.0158069	0.0118674	0.0202154	0.0232645
