# Supplementary material for: RNA promotes phase separation of glycolysis enzymes into yeast G bodies in hypoxia
Source: eLife. 2020 Apr 16;9:e48480. doi: 10.7554/eLife.48480 (PMC7162659; doi:10.7554/eLife.48480)
Supplement: Figure 7—figure supplement 4—source data 1. [file elife-48480-fig7-figsupp4-data1.xlsx]

## Sheet: Sheet1
			number of cells				% of cells			fraction of population from Gb + population	combination of strains	vector + Pfk2D348S-MqsR-Flag	vector + Pfk2-MqsR-Flag	MqsR-Flag + Pfk2D348S-MqsR-Flag	MqsR-Flag + Pfk2-MqsR-Flag	Pfk2-MqsR-Flag-MqsA + Pfk2D348S-MqsR-Flag	Pfk2-MqsR-Flag-MqsA + Pfk2-MqsR-Flag
Replicate 1	conditions	sample	single foci	multiple foci	no foci	total	single foci	multiple foci	no foci
	grown alone	vector	179	1	79	259	69.112	0.3861	30.5019		p-value (one sample T Test)	0.0002	0.0006	0.0039	0.0017	0.4223	0.0655
	grown alone	Pfk2D348S-MqsR-Flag	43	0	232	275	15.6364	0	84.3636
	grown alone	MqsR-Flag	167	0	79	246	67.8862	0	32.1138
	grown alone	Pfk2-MqsR-Flag	46	0	549	595	7.73109	0	92.2689
	grown alone	Pfk2-MqsR-Flag-MqsA	227	6	61	294	77.2109	2.04082	20.7483
	grown alone	vector + Pfk2D348S-MqsR-Flag	255	2	242	499	51.1022	0.400802	48.497	0.663215
	grown alone	vector + Pfk2-MqsR-Flag	185	2	259	446	41.4798	0.44843	58.0717	0.549825
	grown mixed	MqsR-Flag + Pfk2D348S-MqsR-Flag	208	0	203	411	50.6083	0	49.3917	0.669321
	grown mixed	MqsR-Flag + Pfk2-MqsR-Flag	242	2	305	549	44.0801	0.364299	55.5556	0.604256
	grown mixed	Pfk2-MqsR-Flag-MqsA + Pfk2D348S-MqsR-Flag	236	9	258	503	46.9185	1.78926	51.2922	0.508037
	grown mixed	Pfk2-MqsR-Flag-MqsA + Pfk2-MqsR-Flag	100	0	150	250	40	0	60	0.464436
Replicate 2	grown alone	vector	291	3	85	379	76.781	0.791557	22.4274
	grown alone	Pfk2D348S-MqsR-Flag	86	1	481	568	15.1408	0.176056	84.6831
	grown alone	MqsR-Flag	261	0	100	361	72.2992	0	27.7008
	grown alone	Pfk2-MqsR-Flag	58	0	397	455	12.7473	0	87.2527
	grown alone	Pfk2-MqsR-Flag-MqsA	194	11	58	263	73.7643	4.18251	22.0532
	grown alone	vector + Pfk2D348S-MqsR-Flag	292	0	241	533	54.7842	0	45.2158	0.643142
	grown alone	vector + Pfk2-MqsR-Flag	180	3	157	340	52.9412	0.882353	46.1765	0.627699
	grown mixed	MqsR-Flag + Pfk2D348S-MqsR-Flag	212	2	319	533	39.7749	0.375235	59.8499	0.430979
	grown mixed	MqsR-Flag + Pfk2-MqsR-Flag	246	0	301	547	44.9726	0	55.0274	0.54113
	grown mixed	Pfk2-MqsR-Flag-MqsA + Pfk2D348S-MqsR-Flag	99	3	182	284	34.8592	1.05634	64.0845	0.336356
	grown mixed	Pfk2-MqsR-Flag-MqsA + Pfk2-MqsR-Flag	178	4	161	343	51.895	1.16618	46.9388	0.641588
Replicate 3	grown alone	vector	166	0	38	204	81.3725	0	18.6275
	grown alone	Pfk2D348S-MqsR-Flag	59	0	345	404	14.604	0	85.396
	grown alone	MqsR-Flag	213	2	60	275	77.4545	0.727273	21.8182
	grown alone	Pfk2-MqsR-Flag	48	0	418	466	10.3004	0	89.6996
	grown alone	Pfk2-MqsR-Flag-MqsA	126	0	41	167	75.4491	0	24.5509
	grown alone	vector + Pfk2D348S-MqsR-Flag	206	0	102	308	66.8831	0	33.1169	0.78299
	grown alone	vector + Pfk2-MqsR-Flag	156	0	111	267	58.427	0	41.573	0.677151
	grown mixed	MqsR-Flag + Pfk2D348S-MqsR-Flag	177	0	166	343	51.6035	0	48.3965	0.58869
	grown mixed	MqsR-Flag + Pfk2-MqsR-Flag	153	0	172	325	47.0769	0	52.9231	0.547643
	grown mixed	Pfk2-MqsR-Flag-MqsA + Pfk2D348S-MqsR-Flag	216	2	182	400	54	0.5	45.5	0.64748
	grown mixed	Pfk2-MqsR-Flag-MqsA + Pfk2-MqsR-Flag	108	1	109	218	49.5413	0.458716	50	0.602328
Replicate 4	grown alone	vector	252	0	77	329	76.5957	0	23.4043
	grown alone	Pfk2D348S-MqsR-Flag	51	0	378	429	11.8881	0	88.1119
	grown alone	MqsR-Flag	297	4	94	395	75.1899	1.01266	23.7975
	grown alone	Pfk2-MqsR-Flag	38	1	330	369	10.2981	0.271003	89.4309
	grown alone	Pfk2-MqsR-Flag-MqsA	160	5	33	198	80.8081	2.52525	16.6667
	grown alone	vector + Pfk2D348S-MqsR-Flag	211	4	144	359	58.7744	1.11421	40.1114	0.724586
	grown alone	vector + Pfk2-MqsR-Flag	148	0	158	306	48.366	0	51.634	0.574197
	grown mixed	MqsR-Flag + Pfk2D348S-MqsR-Flag	211	1	212	424	49.7642	0.235849	50	0.598341
	grown mixed	MqsR-Flag + Pfk2-MqsR-Flag	277	0	254	531	52.1657	0	47.8343	0.645192
	grown mixed	Pfk2-MqsR-Flag-MqsA + Pfk2D348S-MqsR-Flag	112	2	115	229	48.9083	0.873362	50.2183	0.537147
	grown mixed	Pfk2-MqsR-Flag-MqsA + Pfk2-MqsR-Flag	84	2	91	177	47.4576	1.12994	51.4124	0.527011
Replicate 5	grown alone	vector	319	5	123	447	71.3647	1.11857	27.5168
	grown alone	Pfk2D348S-MqsR-Flag	33	1	298	332	9.93976	0.301205	89.759
	grown alone	MqsR-Flag	380	7	135	522	72.7969	1.341	25.8621
	grown alone	Pfk2-MqsR-Flag	221	38	351	610	36.2295	6.22951	57.541
	grown alone	Pfk2-MqsR-Flag-MqsA	344	14	109	467	73.6617	2.99786	23.3405
	grown alone	vector + Pfk2D348S-MqsR-Flag	310	3	333	646	47.9876	0.464396	51.548	0.619421
	grown alone	vector + Pfk2-MqsR-Flag	287	3	199	489	58.6912	0.613497	40.6953	0.639294
	grown mixed	MqsR-Flag + Pfk2D348S-MqsR-Flag	278	1	327	606	45.8746	0.165017	53.9604	0.57169
	grown mixed	MqsR-Flag + Pfk2-MqsR-Flag	193	0	116	309	62.4595	0	37.5405	0.717306
	grown mixed	Pfk2-MqsR-Flag-MqsA + Pfk2D348S-MqsR-Flag	223	8	248	479	46.5553	1.67015	51.7745	0.574615
	grown mixed	Pfk2-MqsR-Flag-MqsA + Pfk2-MqsR-Flag	182	6	116	304	59.8684	1.97368	38.1579	0.631513
Replicate 6	grown alone	vector	348	3	46	397	87.6574	0.755668	11.5869
	grown alone	Pfk2D348S-MqsR-Flag	47	1	333	381	12.336	0.262467	87.4016
	grown alone	MqsR-Flag	245	3	60	308	79.5455	0.974026	19.4805
	grown alone	Pfk2-MqsR-Flag	79	2	484	565	13.9823	0.353982	85.6637
	grown alone	Pfk2-MqsR-Flag-MqsA	285	11	44	340	83.8235	3.23529	12.9412
	grown alone	vector + Pfk2D348S-MqsR-Flag	211	2	159	372	56.7204	0.537634	42.7419	0.589267
	grown alone	vector + Pfk2-MqsR-Flag	362	4	328	694	52.1614	0.576369	47.2622	0.518209
	grown mixed	MqsR-Flag + Pfk2D348S-MqsR-Flag	271	4	260	535	50.6542	0.747664	48.5981	0.570131
	grown mixed	MqsR-Flag + Pfk2-MqsR-Flag	321	4	308	633	50.7109	0.631912	48.6572	0.560202
	grown mixed	Pfk2-MqsR-Flag-MqsA + Pfk2D348S-MqsR-Flag	254	24	246	524	48.4733	4.58015	46.9466	0.505505
	grown mixed	Pfk2-MqsR-Flag-MqsA + Pfk2-MqsR-Flag	193	0	208	401	48.1297	0	51.8703	0.488929
Replicate 7	grown alone	vector	212	2	55	269	78.8104	0.743494	20.4461
	grown alone	Pfk2D348S-MqsR-Flag	82	0	520	602	13.6213	0	86.3787
	grown alone	MqsR-Flag	511	7	103	621	82.2866	1.12721	16.5862
	grown alone	Pfk2-MqsR-Flag	123	1	658	782	15.7289	0.127877	84.1432
	grown alone	Pfk2-MqsR-Flag-MqsA	237	23	29	289	82.0069	7.95848	10.0346
	grown alone	vector + Pfk2D348S-MqsR-Flag	228	1	218	447	51.0067	0.223714	48.7696	0.573492
	grown alone	vector + Pfk2-MqsR-Flag	336	3	244	583	57.6329	0.51458	41.8525	0.664284
	grown mixed	MqsR-Flag + Pfk2D348S-MqsR-Flag	192	4	140	336	57.1429	1.19048	41.6667	0.633822
	grown mixed	MqsR-Flag + Pfk2-MqsR-Flag	234	6	190	430	54.4186	1.39535	44.186	0.581295
	grown mixed	Pfk2-MqsR-Flag-MqsA + Pfk2D348S-MqsR-Flag	158	0	138	296	53.3784	0	46.6216	0.581366
	grown mixed	Pfk2-MqsR-Flag-MqsA + Pfk2-MqsR-Flag	171	3	154	328	52.1341	0.914634	46.9512	0.549281
Replicate 8	grown alone	vector	196	1	43	240	81.6667	0.416667	17.9167
	grown alone	Pfk2D348S-MqsR-Flag	38	0	233	271	14.0221	0	85.9779
	grown alone	MqsR-Flag	187	3	59	249	75.1004	1.20482	23.6948
	grown alone	Pfk2-MqsR-Flag	31	0	260	291	10.6529	0	89.3471
	grown alone	Pfk2-MqsR-Flag-MqsA	253	9	68	330	76.6667	2.72727	20.6061
	grown alone	vector + Pfk2D348S-MqsR-Flag	238	0	198	436	54.5872	0	45.4128	0.599679
	grown alone	vector + Pfk2-MqsR-Flag	335	2	306	643	52.0995	0.311042	47.5894	0.583642
	grown mixed	MqsR-Flag + Pfk2D348S-MqsR-Flag	311	1	272	584	53.2534	0.171233	46.5753	0.642312
	grown mixed	MqsR-Flag + Pfk2-MqsR-Flag	183	4	221	408	44.8529	0.980392	54.1667	0.530665
	grown mixed	Pfk2-MqsR-Flag-MqsA + Pfk2D348S-MqsR-Flag	203	5	247	455	44.6154	1.0989	54.2857	0.488363
	grown mixed	Pfk2-MqsR-Flag-MqsA + Pfk2-MqsR-Flag	185	5	179	369	50.1355	1.35501	48.5095	0.598096
Replicate 9	grown alone	vector	308	2	130	440	70	0.454545	29.5455
	grown alone	Pfk2D348S-MqsR-Flag	18	0	169	187	9.62567	0	90.3743
	grown alone	MqsR-Flag	210	2	59	271	77.4908	0.738007	21.7712
	grown alone	Pfk2-MqsR-Flag	52	1	341	394	13.198	0.253807	86.5482
	grown alone	Pfk2-MqsR-Flag-MqsA	113	4	24	141	80.1418	2.83688	17.0213
	grown alone	vector + Pfk2D348S-MqsR-Flag	117	0	116	233	50.2146	0	49.7854	0.672288
	grown alone	vector + Pfk2-MqsR-Flag	156	5	129	290	53.7931	1.72414	44.4828	0.714678
	grown mixed	MqsR-Flag + Pfk2D348S-MqsR-Flag	196	1	171	368	53.2609	0.271739	46.4674	0.64297
	grown mixed	MqsR-Flag + Pfk2-MqsR-Flag	265	4	206	475	55.7895	0.842105	43.3684	0.662461
	grown mixed	Pfk2-MqsR-Flag-MqsA + Pfk2D348S-MqsR-Flag	225	8	240	473	47.5687	1.69133	50.74	0.538076
	grown mixed	Pfk2-MqsR-Flag-MqsA + Pfk2-MqsR-Flag	150	7	187	344	43.6047	2.03488	54.3605	0.454212
