# Supplementary material for: RNA promotes phase separation of glycolysis enzymes into yeast G bodies in hypoxia
Source: eLife. 2020 Apr 16;9:e48480. doi: 10.7554/eLife.48480 (PMC7162659; doi:10.7554/eLife.48480)
Supplement: Figure 7—figure supplement 4—source data 2. [file elife-48480-fig7-figsupp4-data2.xlsx]

## Sheet: Sheet1
						number of cells				% of cells				fraction of population from Gb + population
	Odi	OD	generations	days in –O2	plasmid	single foci	multiple foci	no foci	total	single foci	multiple foci	no foci	colonies per ml per OD at innoculation
replicate 1	0.1	0.1		0	vector	NA	NA	NA	NA	NA	NA	NA	21000000
	0.1	0.1		0	Pfk2-MqsR-Flag	NA	NA	NA	NA	NA	NA	NA	19000000	0.525
	0.01	4.26	8.73471	1	vector	232	0	54	286	81.1189	0	18.8811	NA
	0.01	4.16	8.70044	1	Pfk2-MqsR-Flag	67	0	173	240	27.9167	0	72.0833	NA
	0.01	4.5	8.81378	1	vector + Pfk2-MqsR-Flag	176	0	105	281	62.6335	0	37.3665	NA	0.652544
	0.001	2.7	11.3987	1	vector	174	0	27	201	86.5672	0	13.4328	NA
	0.001	2.67	11.3826	1	Pfk2-MqsR-Flag	228	1	146	375	60.8	0.266667	38.9333	NA
	0.001	2.9	11.5018	1	vector + Pfk2-MqsR-Flag	140	1	45	186	75.2688	0.537634	24.1935	NA	0.561522
	0.001	2.15	11.0701	2	vector	272	4	40	316	86.0759	1.26582	12.6582	NA
	0.001	1.99	10.9586	2	Pfk2-MqsR-Flag	118	0	158	276	42.7536	0	57.2464	NA
	0.001	2.4	11.2288	2	vector + Pfk2-MqsR-Flag	353	1	152	506	69.7628	0.197628	30.0395	NA	0.623448
	0.0001	0.6	12.5507	2	vector	198	3	67	268	73.8806	1.1194	25	NA
	0.0001	1.3	13.6662	2	Pfk2-MqsR-Flag	80	1	161	242	33.0579	0.413223	66.5289	NA
	0.0001	1.4	13.7731	2	vector + Pfk2-MqsR-Flag	419	2	205	626	66.9329	0.319489	32.7476	NA	0.829808
replicate 2	0.1	0.1		0	vector	NA	NA	NA	NA	NA	NA	NA	21000000
	0.1	0.1		0	Pfk2-MqsR-Flag	NA	NA	NA	NA	NA	NA	NA	19000000	0.525
	0.01	4.1	8.67948	1	vector	290	1	57	348	83.3333	0.287356	16.3793	NA
	0.01	4.6	8.84549	1	Pfk2-MqsR-Flag	115	1	226	342	33.6257	0.292398	66.0819	NA
	0.01	4.15	8.69697	1	vector + Pfk2-MqsR-Flag	255	0	138	393	64.8855	0	35.1145	NA	0.628873
	0.001	2.75	11.4252	1	vector	205	0	36	241	85.0622	0	14.9378	NA
	0.001	2.8	11.4512	1	vector + Pfk2-MqsR-Flag	361	2	120	483	74.7412	0.414079	24.8447	NA	0.642318
	0.001	2.1	11.0362	2	vector	242	0	42	284	85.2113	0	14.7887	NA
	0.001	1.8	10.8138	2	Pfk2-MqsR-Flag	61	0	117	178	34.2697	0	65.7303	NA
	0.001	2.2	11.1033	2	vector + Pfk2-MqsR-Flag	161	0	76	237	67.9325	0	32.0675	NA	0.660812
	0.0001	0.85	13.0532	2	vector	232	0	78	310	74.8387	0	25.1613	NA
	0.0001	0.82	13.0014	2	Pfk2-MqsR-Flag	119	1	134	254	46.8504	0.393701	52.7559	NA
	0.0001	0.9	13.1357	2	vector + Pfk2-MqsR-Flag	465	5	277	747	62.249	0.669344	37.0817	NA	0.55018
