# Supplementary material for: RNA promotes phase separation of glycolysis enzymes into yeast G bodies in hypoxia
Source: eLife. 2020 Apr 16;9:e48480. doi: 10.7554/eLife.48480 (PMC7162659; doi:10.7554/eLife.48480)
Supplement: Figure 7—source data 1. [file elife-48480-fig7-data1.xlsx]

## Sheet: Sheet1
Source data for figure 6A
Movie	Minutes under cover slip at start of movie	Minutes into movie when fusion starts	Minutes into movie when fusion completed	Time elapsed
1	270	29	47	18
1	270	18	28	10
2	45	61	88	27
2	45	5	17	12
3	90	1	2	1
3	90	1	2	1
3	90	37	37	0
3	90	62	67	5
3	90	97	100	3
3	90	86	88	2
3	90	4	8	4
3	90	51	53	2
3	90	93	95	2
4	290	44	66	22
4	290	11	22	11
4	290	20	26	6
4	290	45	66	21
