# Supplementary material for: RNA promotes phase separation of glycolysis enzymes into yeast G bodies in hypoxia
Source: eLife. 2020 Apr 16;9:e48480. doi: 10.7554/eLife.48480 (PMC7162659; doi:10.7554/eLife.48480)
Supplement: Figure 7—source data 2. [file elife-48480-fig7-data2.xlsx]

## Sheet: Sheet1
Source data for Figure 6C
		single overlapping focus	multiple overlapping focus	adjacent focus	not touching focus	total
Timepoint	Replicate
3 h	1	22	14	16	21	73
3 h	2	42	117	31	44	234
3 h	3	35	79	29	148	291
5 h	1	28	32	6	18	84
5 h	2	35	169	4	36	244
5 h	3	49	97	44	102	292
7 h	1	34	73	4	10	121
7 h	2	41	280	6	31	358
7 h	3	58	96	22	68	244
24 h	1	33	5	2	0	40
24 h	2	66	38	6	15	125
24 h	3	150	36	16	102	304
Chi Square tests of independence
		single overlapping focus	multiple overlapping focus	adjacent focus	not touching focus	total		single overlapping focus	multiple overlapping focus	adjacent focus	not touching focus	total
		Observed values						Expected Values
combined replicates	3 h	99	210	76	213	598		147.143	257.066	46.1527	147.639	598
	5 h	112	298	54	156	620		152.556	266.523	47.8506	153.071	620
	7 h	133	449	32	109	723		177.9	310.8	55.8	178.5	723
	24 h	249	79	24	117	469		115.401	201.612	36.1967	115.79	469
	total	593	1036	186	595	2410		593	1036	186	595	2410
	chi^2 test of difference:		2.83936e-87
	chi^2 test of difference 3 h vs 5 h		6.02968e-19
	chi^2 test of difference 5 h vs 7 h		5.45693e-27
	chi^2 test of difference 7 h vs 24 h		4.10536e-74
		single overlapping focus	multiple overlapping focus	adjacent focus	not touching focus	total		single overlapping focus	multiple overlapping focus	adjacent focus	not touching focus	total
		Observed values						Expected Values
replicate 1	3 h	22	14	16	21	73		17.9622	31.3809	5.63402	18.0228	73
	5 h	28	32	6	18	84		20.6689	36.1095	6.48299	20.7386	84
	7 h	34	73	4	10	121		29.773	52.0149	9.33859	29.8734	121
	24 h	33	5	2	0	40		9.84232	17.195	3.08714	9.87552	40
	total	117	124	28	49	318		78.2465	136.7	24.5427	78.5104	318
	chi^2 test of difference:		3.99379e-24
	chi^2 test of difference 3 h vs 5 h		2.44873e-07
	chi^2 test of difference 5 h vs 7 h		2.46119e-06
	chi^2 test of difference 7 h vs 24 h		2.90949e-21
		single overlapping focus	multiple overlapping focus	adjacent focus	not touching focus	total		single overlapping focus	multiple overlapping focus	adjacent focus	not touching focus	total
		Observed values						Expected Values
replicate 2	3 h	42	117	31	44	234		57.5776	100.591	18.0598	57.7718	234
	5 h	35	169	4	36	244		60.0382	104.89	18.8315	60.2407	244
	7 h	41	280	6	31	358		88.0888	153.895	27.6299	88.3859	358
	24 h	66	38	6	15	125		30.7573	53.7344	9.6473	30.861	125
	total	184	604	47	126	961		236.462	413.11	74.1685	237.259	961
	chi^2 test of difference:		3.38679e-65
	chi^2 test of difference 3 h vs 5 h		1.70303e-19
	chi^2 test of difference 5 h vs 7 h		1.00677e-54
	chi^2 test of difference 7 h vs 24 h		3.80674e-51
		single overlapping focus	multiple overlapping focus	adjacent focus	not touching focus	total		single overlapping focus	multiple overlapping focus	adjacent focus	not touching focus	total
		Observed values						Expected Values
replicate 3	3 h	35	79	29	148	291		71.6029	125.094	22.4589	71.8444	291
	5 h	49	97	44	102	292		71.849	125.524	22.5361	72.0913	292
	7 h	58	96	22	68	244		60.0382	104.89	18.8315	60.2407	244
	24 h	150	36	16	102	304		74.8017	130.682	23.4622	75.0539	304
	total	292	308	111	420	1131		278.292	486.189	87.2888	279.23	1131
	chi^2 test of difference:		2.64521e-64
	chi^2 test of difference 3 h vs 5 h		1.58555e-35
	chi^2 test of difference 5 h vs 7 h		1.33414e-10
	chi^2 test of difference 7 h vs 24 h		3.6763e-34
