# Supplementary material for: RNA promotes phase separation of glycolysis enzymes into yeast G bodies in hypoxia
Source: eLife. 2020 Apr 16;9:e48480. doi: 10.7554/eLife.48480 (PMC7162659; doi:10.7554/eLife.48480)
Supplement: Supplementary file 4. — Related to Figures 2 and 3. [file elife-48480-supp4.xlsx]

## Sheet: Sheet1
Table S1: G body RNA Immunoprecipitation and sequencing. (A): Genes IDs. (B-J): Reads Per Million for each gene for the indicated sample or average of each set of samples with total number of reads in the sample in row 6. (K): LOG 10 enrichment of RNA.Test. (O): Indication of whether gene is >2 fold enriched with a p value <0.05 for enrichment mRNA of IP over flow through. (P): Indication of whet…
Total Reads	1136317	3008258	4144575	1277347	2343874	3621221	2924739	1680621	4605360							PAR-CLIP Data
Gene	IP rep 1	IP rep 2	IP average	FT rep 1	FT rep 2	FT average	Total RNA rep 1	Total RNA rep 2	Total RNA average	LOG10(IP-FT)	p value IP vs. FT	LOG10(IP – Total)	p value IP vs. total	Enriched over FT	Enriched over total RNA	PFK2 PAR-CLIP	ENO1 PAR-CLIP	FBA1 PAR-CLIP	Total Sites
snR189	401.668	362.123	381.896	157.522	119.709	138.615	45.594	40.2181	42.9061	0.440133	0.0124879	0.949426	0.0361346	Y	Y	1	2	2	5
snR31	197.765	205.549	201.657	100.026	78.3278	89.1772	44.0742	48.798	46.4361	0.35436	0.039037	0.637758	0.00905975	Y	Y	0	1	0	1
snR35	344.385	361.752	353.068	148.858	127.394	138.126	59.2722	47.7255	53.4989	0.407583	0.00489052	0.819514	0.00949744	Y	Y	0	2	3	5
snR36	84.5618	87.5625	86.0621	33.8672	26.3063	30.0868	24.0128	28.9571	26.485	0.456436	0.0225013	0.511813	0.00134724	Y	Y	0	2	2	4
snR4	604.207	642.619	623.413	252.035	217.544	234.79	112.465	124.408	118.437	0.424097	0.00459384	0.72129	0.0212689	Y	Y	1	2	3	6
snR5	218.224	199.613	208.918	96.0884	77.4411	86.7648	52.889	75.6101	64.2496	0.381633	0.0114303	0.512106	0.0120056	Y	Y	1	0	3	4
snR52	12.2751	13.357	12.816	5.51327	4.72923	5.12125	3.64752	7.50739	5.57745	0.398378	0.0103019	0.361318	0.0496564	Y	Y	1	2	2	5
snR64	19.7765	21.5196	20.6481	3.93805	5.61596	4.777	3.0396	5.89866	4.46913	0.635724	0.00579179	0.664656	0.00610242	Y	Y	0	1	1	2
snR69	5.4556	4.82336	5.13948	2.36283	1.77346	2.06815	2.12772	2.68121	2.40446	0.395338	0.0194841	0.3299	0.0443949	Y	Y	0	0	1	1
YBL017C	57.9657	57.5092	57.7375	22.8407	17.7346	20.2876	18.2376	23.0584	20.648	0.454226	0.0418099	0.44658	0.0173462	Y	Y	0	1	2	3
YBR172C	9.54729	10.3888	9.96803	3.93805	5.0248	4.48143	5.16732	4.28994	4.72863	0.347193	0.0182264	0.323874	0.0189754	Y	Y	1	0	1	2
YDL145C	35.4614	31.5373	33.4994	10.2389	15.0744	12.6567	12.7663	19.3047	16.0355	0.422717	0.0239963	0.319953	0.0270621	Y	Y	0	2	1	3
YDR011W	64.7852	58.6223	61.7038	14.9646	17.7346	16.3496	18.8455	28.4208	23.6332	0.576805	0.0194411	0.41679	0.0141263	Y	Y	0	1	0	1
YDR060W	14.3209	12.6149	13.4679	4.72566	4.13807	4.43187	7.29504	5.89866	6.59685	0.482714	0.0392561	0.309964	0.0452637	Y	Y	0	1	0	1
YDR127W	102.292	95.354	98.8232	47.2566	49.9525	48.6045	41.6425	52.0155	46.829	0.308182	0.0237256	0.324344	0.00995138	Y	Y	0	0	1	1
YDR213W	104.338	110.195	107.267	23.6283	37.2427	30.4355	34.6514	41.8269	38.2392	0.547085	0.0294417	0.447957	0.00587471	Y	Y	0	1	0	1
YDR293C	57.9657	55.6541	56.8099	22.0531	19.2125	20.6328	20.6693	31.102	25.8857	0.439866	0.00307435	0.341365	0.0300389	Y	Y	0	3	2	5
YDR457W	143.891	138.022	140.957	27.5663	33.4002	30.4833	28.8762	43.9718	36.424	0.665025	0.00140012	0.587698	0.00295853	Y	Y	0	3	3	6
YFR019W	30.0058	34.5055	32.2557	13.3894	10.3452	11.8673	8.51088	13.406	10.9585	0.434255	0.0244799	0.468856	0.0316136	Y	Y	0	1	0	1
YGL062W	60.0116	58.9934	59.5025	28.354	28.9665	28.6602	24.0128	28.9571	26.485	0.317255	0.0012427	0.351536	0.0103646	Y	Y	0	1	0	1
YGL195W	92.7451	86.8204	89.7828	28.354	31.0356	29.6948	31.3079	39.1457	35.2268	0.480513	0.0123422	0.40632	0.00789739	Y	Y	0	2	1	3
YGR100W	10.9112	10.3888	10.65	3.93805	4.13807	4.03806	4.25544	5.89866	5.07705	0.421176	0.0117677	0.321737	0.015072	Y	Y	0	0	1	1
YHR099W	119.341	112.05	115.696	21.2655	26.8975	24.0815	26.1406	29.4933	27.8169	0.681634	0.00334281	0.619008	0.0200946	Y	Y	0	3	1	4
YHR165C	54.556	55.6541	55.105	11.8141	18.3258	15.07	12.4624	13.406	12.9342	0.563079	0.0459963	0.629452	0.00221406	Y	Y	0	2	0	2
YIL129C	51.1462	54.17	52.6581	19.6902	17.1435	18.4169	18.5416	20.3772	19.4594	0.45625	0.00375501	0.432336	0.0184673	Y	Y	0	1	1	2
YJL005W	55.9199	52.6859	54.3029	10.2389	13.301	11.7699	10.9426	17.696	14.3193	0.664049	0.00276739	0.578902	0.00373567	Y	Y	0	1	1	2
YJL042W	34.0975	33.0214	33.5595	8.66371	9.75403	9.20887	5.77524	6.4349	6.10507	0.561609	0.000988905	0.740124	0.00667631	Y	Y	0	2	0	2
YKL014C	17.0487	16.3252	16.687	4.72566	4.72923	4.72744	8.51088	6.4349	7.47289	0.547751	0.0192486	0.348889	0.00660931	Y	Y	0	0	1	1
YKR010C	2.7278	2.59719	2.66249	0.78761	0.88673	0.83717	0.30396	0.536242	0.420101	0.502475	0.00280905	0.801935	0.0017113	Y	Y	0	1	0	1
YKR054C	76.3784	65.6718	71.0251	12.6018	16.5523	14.577	7.29504	12.8698	10.0824	0.687743	0.0373336	0.847847	0.0441418	Y	Y	0	2	0	2
YLL021W	13.639	15.5831	14.6111	0.78761	4.13807	2.46284	3.34356	4.82618	4.08487	0.773245	0.040725	0.553504	0.0367082	Y	Y	0	0	1	1
YLL040C	98.2007	93.1279	95.6643	29.9292	27.7842	28.8567	18.8455	29.4933	24.1694	0.520503	0.00962922	0.597484	0.00287156	Y	Y	1	2	0	3
YLR187W	6.8195	6.30747	6.56348	2.36283	1.18231	1.77257	1.21584	1.60873	1.41228	0.568531	0.0454842	0.667212	0.0161574	Y	Y	0	0	1	1
YLR189C	13.639	15.2121	14.4256	7.8761	6.50269	7.18939	7.90296	6.4349	7.16893	0.30244	0.0211697	0.303678	0.0332061	Y	Y	0	1	0	1
YLR256W	135.708	140.248	137.978	44.8938	49.3613	47.1275	52.2811	80.4363	66.3587	0.466536	0.00122841	0.317912	0.0489026	Y	Y	0	1	0	1
YLR384C	27.278	28.5691	27.9235	9.45132	8.8673	9.15931	11.8544	9.65235	10.7534	0.484108	0.00749278	0.414425	0.00256709	Y	Y	0	1	1	2
YML059C	25.2321	24.4878	24.86	7.08849	5.32038	6.20444	7.29504	9.65235	8.4737	0.602798	0.0130545	0.467428	0.00426424	Y	Y	0	2	0	2
YML085C	8.1834	7.42055	7.80197	3.15044	3.54692	3.34868	3.34356	4.28994	3.81675	0.367331	0.0223018	0.310511	0.0233704	Y	Y	0	2	0	2
YMR109W	19.7765	18.1803	18.9784	7.08849	8.27615	7.68232	8.20692	9.65235	8.92964	0.392768	0.0101088	0.327427	0.0251381	Y	Y	1	1	0	2
YNL068C	6.13755	6.67849	6.40802	3.15044	2.36461	2.75753	3.64752	2.14497	2.89624	0.366204	0.0230817	0.344889	0.0183513	Y	Y	0	0	1	1
YNL172W	15.0029	13.357	14.1799	3.93805	3.25134	3.5947	3.95148	5.36242	4.65695	0.596012	0.0255779	0.483573	0.0300728	Y	Y	0	1	1	2
YNL262W	14.3209	14.099	14.21	4.72566	4.13807	4.43187	3.0396	5.36242	4.20101	0.506007	0.00845056	0.52924	0.0330914	Y	Y	1	1	0	2
YNR016C	494.413	525.746	510.08	148.858	178.233	163.546	180.248	218.25	199.249	0.493999	0.00388615	0.408241	0.00801371	Y	Y	2	3	4	9
YNR031C	16.3668	14.8411	15.6039	3.15044	4.13807	3.64426	6.0792	4.82618	5.45269	0.631625	0.0101095	0.456624	0.0239175	Y	Y	1	1	2	4
YNR065C	15.0029	13.728	14.3655	4.72566	4.43365	4.57966	4.86336	7.50739	6.18537	0.496486	0.0327645	0.365953	0.0146463	Y	Y	0	1	0	1
YOR153W	111.84	100.177	106.009	34.6548	43.1542	38.9045	38.299	66.494	52.3965	0.435341	0.0150112	0.306039	0.0391762	Y	Y	0	4	2	6
YOR191W	30.6877	30.7953	30.7415	7.08849	6.79827	6.94338	5.47128	3.21745	4.34437	0.646154	0.00114811	0.849799	0.0125007	Y	Y	0	1	0	1
YOR290C	31.3697	32.6504	32.01	7.8761	10.6408	9.25843	8.51088	14.4785	11.4947	0.538749	0.015952	0.444788	0.0250461	Y	Y	0	0	1	1
YOR326W	34.7794	37.8448	36.3121	11.0265	10.6408	10.8337	13.6782	17.696	15.6871	0.525277	0.0355021	0.364509	0.0140316	Y	Y	0	1	1	2
YPL231W	1050.2	1103.06	1076.63	327.646	363.855	345.75	303.96	326.035	314.998	0.493305	0.00342498	0.533761	0.0173334	Y	Y	1	5	8	14
YPR024W	13.639	11.8729	12.7559	5.51327	6.50269	6.00798	3.34356	6.97114	5.15735	0.326984	0.0388263	0.393285	0.0340204	Y	Y	1	1	0	2
YPR115W	30.6877	32.6504	31.6691	7.8761	11.8231	9.84958	9.42276	12.8698	11.1463	0.507217	0.0255692	0.453505	0.00469192	Y	Y	0	1	1	2
YPR117W	48.4184	44.1523	46.2853	14.177	11.2319	12.7044	7.599	16.0873	11.8431	0.561488	0.00913625	0.591977	0.00855646	Y	Y	0	2	0	2
YPL205C	1.3639	1.48411	1.424	0.78761	0.591154	0.689382	0.60792	0.536242	0.572081	0.315052	0.0369538	0.396054	0.0300927	Y	Y	0	0	0	0
YPL176C	6.13755	6.67849	6.40802	3.15044	2.06904	2.60974	2.43168	0.536242	1.48396	0.390127	0.0489011	0.635301	0.0204427	Y	Y	0	0	0	0
YPL137C	32.0516	28.9401	30.4959	7.08849	6.50269	6.79559	7.90296	9.11611	8.50954	0.652014	0.0355902	0.554335	0.0387133	Y	Y	0	0	0	0
YOR396W	42.2809	41.5551	41.918	10.2389	10.9363	10.5876	6.0792	8.57987	7.32954	0.597601	0.000260814	0.757324	0.00164335	Y	Y	0	0	0	0
YOR049C	10.2292	10.7598	10.4945	3.15044	3.8425	3.49647	5.16732	2.14497	3.65614	0.477333	0.00506346	0.457939	0.0412608	Y	Y	0	0	0	0
YOR027W	42.2809	47.4915	44.8862	13.3894	14.4833	13.9363	19.7574	24.6671	22.2123	0.507965	0.0448662	0.30552	0.0413121	Y	Y	0	0	0	0
YOL023W	3.40975	2.96822	3.18898	0.78761	0.88673	0.83717	1.21584	1.60873	1.41228	0.580839	0.0493271	0.353731	0.0485728	Y	Y	0	0	0	0
YNL250W	6.8195	5.93644	6.37797	1.57522	2.06904	1.82213	3.0396	1.60873	2.32416	0.544103	0.024489	0.438416	0.0182259	Y	Y	0	0	0	0
YNL019C	3.40975	2.96822	3.18898	0.78761	0.295577	0.541593	0.30396	1.07248	0.688222	0.769979	0.0157529	0.665924	0.0165633	Y	Y	0	0	0	0
YNL014W	10.2292	9.64671	9.93798	3.93805	2.66019	3.29912	2.43168	4.28994	3.36081	0.4789	0.0309224	0.470854	0.0142294	Y	Y	0	0	0	0
YMR207C	23.1863	25.9719	24.5791	3.15044	6.79827	4.97435	5.77524	7.50739	6.64131	0.693829	0.0163827	0.568312	0.0344839	Y	Y	0	0	0	0
YMR165C	10.9112	10.3888	10.65	3.93805	2.95577	3.44691	4.25544	5.36242	4.80893	0.489919	0.0153239	0.3453	0.00470809	Y	Y	0	0	0	0
YMR162C	23.1863	23.7458	23.466	6.30088	7.38942	6.84515	7.29504	9.65235	8.4737	0.535056	0.00541593	0.442366	0.00876229	Y	Y	0	0	0	0
YMR031C	10.2292	12.2439	11.2366	1.57522	3.8425	2.70886	3.34356	1.60873	2.47614	0.617848	0.0311425	0.656858	0.0391283	Y	Y	0	0	0	0
YML133C	30.0058	29.3112	29.6585	6.30088	6.79827	6.54957	4.25544	6.97114	5.61329	0.655936	0.000643456	0.722931	0.00457854	Y	Y	0	0	0	0
YLR399C	15.0029	13.357	14.1799	4.72566	3.8425	4.28408	3.64752	4.28994	3.96873	0.519817	0.0204406	0.553023	0.0445826	Y	Y	0	0	0	0
YLR337C	10.9112	10.0177	10.4645	3.93805	4.72923	4.33364	2.73564	3.75369	3.24467	0.382864	0.00980869	0.508547	0.0125051	Y	Y	0	0	0	0
YLR154W-F	374.39	355.815	365.103	108.69	69.4605	89.0754	22.1891	28.9571	25.5731	0.612658	0.0192899	1.15463	0.0142301	Y	Y	0	0	0	0
YLR133W	8.1834	8.1626	8.173	1.57522	2.36461	1.96992	3.34356	3.75369	3.54863	0.617934	0.0403234	0.362321	0.013477	Y	Y	0	0	0	0
YLL066C	21.1404	20.0355	20.588	6.30088	5.61596	5.95842	3.95148	5.36242	4.65695	0.538482	0.00452591	0.645512	0.00382507	Y	Y	0	0	0	0
YKR072C	9.54729	8.90466	9.22598	3.15044	2.95577	3.0531	4.86336	4.28994	4.57665	0.480271	0.0213062	0.304465	0.0192773	Y	Y	0	0	0	0
YJR154W	5.4556	5.93644	5.69602	0.78761	1.47788	1.13275	0.30396	1.07248	0.688222	0.701438	0.0122881	0.917843	0.00494086	Y	Y	0	0	0	0
YJR059W	12.2751	13.357	12.816	6.30088	5.0248	5.66284	2.43168	4.28994	3.36081	0.354719	0.0145076	0.58131	0.00678212	Y	Y	0	0	0	0
YJL225C	38.8711	41.9261	40.3986	3.93805	10.0496	6.99383	7.29504	9.11611	8.20558	0.761651	0.025826	0.692257	0.0196942	Y	Y	0	0	0	0
YJL078C	49.1004	45.6364	47.3684	16.5398	18.9169	17.7284	14.894	12.8698	13.8819	0.42682	0.00795484	0.533039	0.0213971	Y	Y	0	0	0	0
YJL076W	27.9599	29.3112	28.6355	11.0265	7.98057	9.50356	8.51088	10.1886	9.34974	0.479019	0.0245774	0.486106	0.00412886	Y	Y	0	0	0	0
YIR033W	97.5188	94.983	96.2509	34.6548	32.5134	33.5841	35.8673	52.0155	43.9414	0.457271	0.000824545	0.340531	0.0363203	Y	Y	0	0	0	0
YIR006C	41.5989	38.2158	39.9074	17.3274	10.3452	13.8363	9.1188	19.841	14.4799	0.460033	0.0461341	0.440288	0.029218	Y	Y	0	0	0	0
YIL173W	8.86534	8.1626	8.51397	2.36283	2.95577	2.6593	2.73564	3.21745	2.97655	0.505365	0.00678728	0.45642	0.0248837	Y	Y	0	0	0	0
YIL151C	10.9112	10.0177	10.4645	5.51327	4.43365	4.97346	5.77524	3.21745	4.49635	0.323058	0.0175235	0.366857	0.0189108	Y	Y	0	0	0	0
YIL150C	4.77365	5.19438	4.98402	2.36283	2.06904	2.21593	1.5198	1.07248	1.29614	0.352023	0.0123574	0.584927	0.0111847	Y	Y	0	0	0	0
YHR023W	12.2751	13.357	12.816	3.93805	5.91154	4.92479	3.0396	3.75369	3.39665	0.415366	0.037013	0.576703	0.0227429	Y	Y	0	0	0	0
YHL050C	17.0487	17.4383	17.2435	3.93805	3.54692	3.74249	2.12772	4.28994	3.20883	0.663466	0.000417727	0.730279	0.0129679	Y	Y	0	0	0	0
YGR217W	21.1404	23.7458	22.4431	4.72566	4.43365	4.57966	8.51088	10.1886	9.34974	0.69025	0.0438871	0.380283	0.0456465	Y	Y	0	0	0	0
YGR109W-B	11.5931	12.2439	11.9185	3.15044	4.43365	3.79205	6.38316	4.82618	5.60467	0.497349	0.0204349	0.327672	0.00639539	Y	Y	0	0	0	0
YGR070W	10.9112	11.5018	11.2065	2.36283	2.95577	2.6593	6.68712	3.75369	5.22041	0.624704	0.00238857	0.331766	0.0413988	Y	Y	0	0	0	0
YGL216W	6.13755	5.19438	5.66596	2.36283	1.77346	2.06815	0.60792	2.14497	1.37644	0.437693	0.0351098	0.614515	0.0258372	Y	Y	0	0	0	0
YGL197W	51.8282	49.7177	50.7729	12.6018	12.7098	12.6558	12.7663	16.6235	14.6949	0.603343	0.0173322	0.538465	0.00172228	Y	Y	0	0	0	0
YER164W	19.0946	17.0673	18.0809	5.51327	6.79827	6.15577	6.68712	3.21745	4.95229	0.467938	0.0169005	0.562415	0.0097131	Y	Y	0	0	0	0
YER152C	7.50145	7.04952	7.27548	3.15044	2.66019	2.90532	2.12772	2.14497	2.13634	0.398669	0.0059172	0.532191	0.0279424	Y	Y	0	0	0	0
YEL077C	23.1863	19.6645	21.4254	7.8761	4.43365	6.15488	4.5594	2.68121	3.62031	0.541709	0.0250618	0.772183	0.0471846	Y	Y	0	0	0	0
YEL030W	2.04585	2.22616	2.13601	0.78761	0.88673	0.83717	0.91188	1.07248	0.992182	0.406789	0.0149694	0.333011	0.0253449	Y	Y	0	0	0	0
YDR545W	36.1433	38.9579	37.5506	7.8761	10.6408	9.25843	6.0792	5.89866	5.98893	0.608079	0.00483242	0.797268	0.0281712	Y	Y	0	0	0	0
YDR466W	6.8195	7.79157	7.30554	2.36283	1.18231	1.77257	3.0396	2.14497	2.59228	0.615049	0.0204599	0.449969	0.0315818	Y	Y	0	0	0	0
YDR186C	94.791	96.0961	95.4435	28.354	28.6709	28.5125	33.4356	36.4644	34.95	0.524712	0.00382054	0.436299	0.000324216	Y	Y	0	0	0	0
YDR176W	4.77365	5.56541	5.16953	1.57522	2.36461	1.96992	2.12772	0.536242	1.33198	0.419003	0.0291961	0.588953	0.0171127	Y	Y	0	0	0	0
YDR122W	25.2321	21.5196	23.3759	4.72566	7.09384	5.90975	5.47128	9.65235	7.56182	0.597198	0.0243526	0.490141	0.0363083	Y	Y	0	0	0	0
YDR028C	26.596	25.9719	26.284	7.8761	6.79827	7.33718	8.81484	11.2611	10.038	0.554162	0.00332241	0.418046	0.00716077	Y	Y	0	0	0	0
YDL233W	3.40975	3.71027	3.56001	1.57522	1.47788	1.52655	1.82376	1.60873	1.71624	0.36774	0.0306118	0.316873	0.0306179	Y	Y	0	0	0	0
YDL220C	4.0917	3.71027	3.90099	1.57522	1.18231	1.37876	0.91188	1.60873	1.2603	0.451685	0.0116122	0.490699	0.0110771	Y	Y	0	0	0	0
YCL061C	6.13755	5.56541	5.85148	0.78761	1.47788	1.13275	1.82376	1.60873	1.71624	0.713133	0.00998833	0.532687	0.0371454	Y	Y	0	0	0	0
YBR208C	55.2379	53.0569	54.1474	18.115	20.6904	19.4027	16.7178	21.4497	19.0837	0.445716	0.00266559	0.452914	0.00231927	Y	Y	0	0	0	0
YBR065C	4.77365	4.82336	4.7985	1.57522	1.77346	1.67434	0.91188	1.60873	1.2603	0.457262	0.0139646	0.580631	0.0297549	Y	Y	0	0	0	0
YBR059C	34.0975	30.0532	32.0753	6.30088	11.5275	8.91419	8.51088	11.7973	10.1541	0.55609	0.0231646	0.49953	0.0346571	Y	Y	0	0	0	0
YBL111C	13.639	14.099	13.869	2.36283	2.06904	2.21593	2.12772	3.21745	2.67259	0.796489	0.00141432	0.715114	0.00123812	Y	Y	0	0	0	0
YBL066C	12.2751	11.1308	11.703	3.15044	4.72923	3.93983	3.95148	5.89866	4.92507	0.472818	0.0199914	0.375883	0.0150496	Y	Y	0	0	0	0
YAR042W	51.8282	47.4915	49.6598	15.7522	20.9859	18.3691	13.3742	13.9423	13.6583	0.431918	0.0128947	0.56061	0.0376769	Y	Y	0	0	0	0
tV(UAC)B	16.3668	14.4701	15.4184	8.66371	6.20711	7.43541	5.47128	6.97114	6.22121	0.316735	0.0406426	0.394165	0.0412528	Y	Y	0	0	0	0
tV(AAC)H	34.7794	37.1027	35.9411	11.8141	7.98057	9.89736	8.51088	10.7248	9.61786	0.560072	0.0141719	0.572513	0.00999376	Y	Y	0	0	0	0
TLC1	73.6506	86.4494	80.05	26.7787	20.3948	23.5868	23.101	26.8121	24.9565	0.530693	0.0353223	0.506177	0.0697534	Y	N	0	1	1	2
YAL029C	38.1892	31.5373	34.8633	15.7522	9.75403	12.7531	11.8544	16.6235	14.239	0.436752	0.0394925	0.388889	0.0791696	Y	N	1	1	0	2
YBL050W	2.04585	1.85514	1.95049	0.78761	0.591154	0.689382	2.43168	4.28994	3.36081	0.451685	0.0116122	-0.236299	0.142578	Y	N	0	1	0	1
YBR126C	27.278	24.1168	25.6974	13.3894	11.8231	12.6062	12.4624	20.9134	16.6879	0.309304	0.03896	0.187487	0.130174	Y	N	1	2	0	3
YBR162C	29.3238	31.1663	30.2451	12.6018	11.8231	12.2124	21.2772	27.8846	24.5809	0.393853	0.0143574	0.0900569	0.201984	Y	N	1	1	2	4
YBR229C	8.1834	7.79157	7.98748	3.15044	2.36461	2.75753	4.5594	10.1886	7.374	0.46189	0.0194522	0.034707	0.672832	Y	N	0	1	0	1
YCR030C	4.77365	4.45233	4.61299	2.36283	1.77346	2.06815	4.86336	3.75369	4.30853	0.348401	0.0331326	0.0296535	0.241336	Y	N	1	1	0	2
YCR061W	5.4556	6.30747	5.88153	2.36283	1.47788	1.92036	2.12772	5.36242	3.74507	0.486108	0.0232901	0.19603	0.319077	Y	N	0	1	0	1
YDL140C	54.556	53.0569	53.8064	25.9911	21.8727	23.9319	26.1406	37.5369	31.8387	0.351857	0.0253277	0.227878	0.0775356	Y	N	1	1	0	2
YDL185W	77.0603	66.0429	71.5516	31.5044	39.9029	35.7036	49.8494	64.8853	57.3674	0.301907	0.0406855	0.0959544	0.27418	Y	N	1	1	2	4
YDR001C	32.0516	26.714	29.3828	10.2389	14.1877	12.2133	19.1495	19.841	19.4952	0.38126	0.0419293	0.178165	0.169385	Y	N	0	1	0	1
YDR206W	6.8195	7.04952	6.93451	3.15044	3.54692	3.34868	4.5594	5.89866	5.22903	0.316142	0.00958035	0.122594	0.123418	Y	N	0	1	0	1
YDR324C	5.4556	5.19438	5.32499	2.36283	2.36461	2.36372	5.77524	3.21745	4.49635	0.352722	0.028053	0.0734591	0.250754	Y	N	0	0	1	1
YDR409W	6.13755	5.19438	5.66596	0.78761	1.77346	1.28054	3.64752	3.21745	3.43249	0.645882	0.0234671	0.217665	0.112398	Y	N	0	0	1	1
YEL025C	8.1834	9.64671	8.91505	3.93805	3.25134	3.5947	5.47128	5.89866	5.68497	0.394462	0.049282	0.195396	0.140173	Y	N	0	1	0	1
YER016W	2.04585	1.85514	1.95049	0.78761	0.591154	0.689382	1.82376	1.60873	1.71624	0.451685	0.0116122	0.0555656	0.151287	Y	N	0	1	0	1
YER025W	7.50145	7.04952	7.27548	3.93805	2.95577	3.44691	6.68712	8.04363	7.36537	0.324432	0.0455643	-0.00533304	0.416501	Y	N	0	1	0	1
YGL073W	8.1834	7.04952	7.61646	1.57522	2.36461	1.96992	3.95148	4.82618	4.38883	0.587305	0.020238	0.239404	0.0856276	Y	N	1	0	0	1
YGR240C	56.6018	53.0569	54.8294	27.5663	26.3063	26.9363	38.9069	40.7544	39.8306	0.308675	0.023428	0.138796	0.0621645	Y	N	2	5	2	9
YHR077C	7.50145	6.67849	7.08997	3.15044	2.66019	2.90532	6.99108	2.14497	4.56802	0.387451	0.0231843	0.190916	0.171446	Y	N	0	0	1	1
YJL129C	17.7307	14.4701	16.1004	3.15044	5.61596	4.3832	6.68712	6.97114	6.82913	0.565045	0.0341739	0.372471	0.111097	Y	N	0	1	0	1
YJL130C	130.934	140.248	135.591	58.2831	68.5738	63.4285	63.2237	89.5524	76.388	0.329948	0.00943191	0.249207	0.0293427	Y	N	2	3	2	7
YJL207C	8.86534	10.0177	9.44154	3.15044	3.8425	3.49647	10.0307	7.50739	8.76903	0.431413	0.0224314	0.0320912	0.267627	Y	N	0	1	0	1
YJR066W	42.2809	50.4597	46.3703	7.08849	13.0054	10.0469	11.8544	15.0148	13.4346	0.664206	0.023999	0.538015	0.0715234	Y	N	1	0	0	1
YJR151C	90.0173	76.0606	83.039	33.8672	44.0409	38.9541	48.6336	62.7403	55.687	0.328729	0.0435335	0.173529	0.13284	Y	N	0	1	0	1
YKL010C	15.6848	15.2121	15.4485	6.30088	7.09384	6.69736	8.81484	9.65235	9.2336	0.362982	0.00660988	0.223515	0.00294093	Y	N	0	1	0	1
YKL182W	609.663	616.276	612.97	230.77	241.486	236.128	288.458	361.427	324.943	0.414292	0.000899615	0.275632	0.0371504	Y	N	2	10	2	14
YKR021W	10.2292	11.8729	11.0511	3.93805	5.61596	4.777	5.77524	6.4349	6.10507	0.364248	0.0333283	0.257713	0.097585	Y	N	0	1	0	1
YKR039W	4.77365	4.45233	4.61299	1.57522	0.88673	1.23098	3.0396	4.28994	3.66477	0.573733	0.0325761	0.0999358	0.252931	Y	N	0	2	0	2
YKR042W	48.4184	46.3784	47.3984	17.3274	17.7346	17.531	20.3653	30.0295	25.1974	0.431957	0.0172639	0.274408	0.0460275	Y	N	1	4	1	6
YLL055W	3.40975	3.33925	3.3745	0.78761	0.88673	0.83717	3.64752	3.75369	3.70061	0.605395	0.00105087	-0.0400639	0.0188533	Y	N	0	1	1	2
YLR095C	8.1834	7.04952	7.61646	3.93805	3.25134	3.5947	2.43168	6.97114	4.70141	0.326091	0.0405861	0.209525	0.33483	Y	N	0	0	1	1
YLR228C	4.77365	4.45233	4.61299	2.36283	1.77346	2.06815	2.43168	3.21745	2.82457	0.348401	0.0331326	0.213031	0.0268812	Y	N	0	0	1	1
YLR240W	5.4556	4.45233	4.95396	2.36283	1.47788	1.92036	2.43168	3.21745	2.82457	0.411571	0.0466598	0.244001	0.126152	Y	N	2	0	0	2
YLR394W	3.40975	3.33925	3.3745	0.78761	0.88673	0.83717	0.60792	1.60873	1.10832	0.605395	0.00105087	0.483543	0.0736651	Y	N	1	0	0	1
YLR422W	21.8224	21.8906	21.8565	9.45132	7.685	8.56816	11.2465	10.7248	10.9857	0.406693	0.0419633	0.298754	0.0044238	Y	N	0	1	0	1
YLR436C	13.639	12.2439	12.9414	3.93805	4.43365	4.18585	4.25544	11.2611	7.75826	0.490199	0.0310439	0.222219	0.272036	Y	N	0	0	1	1
YMR037C	6.8195	6.67849	6.74899	2.36283	2.36461	2.36372	5.16732	8.04363	6.60547	0.455643	0.0102219	0.00933503	0.569728	Y	N	0	3	0	3
YMR129W	9.54729	11.1308	10.3391	3.15044	4.43365	3.79205	6.99108	5.89866	6.44487	0.435607	0.0259341	0.205267	0.0915549	Y	N	0	1	0	1
YMR190C	10.9112	12.2439	11.5775	3.15044	2.95577	3.0531	5.16732	5.89866	5.53299	0.578875	0.0454295	0.320657	0.0561426	Y	N	0	1	0	1
YMR261C	15.6848	12.6149	14.1499	3.15044	5.91154	4.53099	6.38316	9.65235	8.01776	0.49456	0.0440295	0.2467	0.12781	Y	N	0	0	2	2
YNL064C	21.1404	19.2934	20.2169	11.0265	9.16288	10.0947	17.0218	18.7685	17.8951	0.301621	0.0163906	0.0529807	0.254393	Y	N	2	0	1	3
YNL186W	11.5931	11.5018	11.5475	3.93805	2.66019	3.29912	6.38316	8.04363	7.21339	0.54409	0.048164	0.204348	0.0643229	Y	N	0	0	2	2
YNL192W	32.0516	28.9401	30.4959	11.8141	12.7098	12.262	16.7178	19.841	18.2794	0.395681	0.0393675	0.22228	0.0456819	Y	N	1	1	0	2
YOL036W	8.1834	10.0177	9.10057	0.78761	2.66019	1.7239	3.34356	7.50739	5.42547	0.722556	0.0301776	0.224631	0.200031	Y	N	0	1	0	1
YOL089C	4.0917	4.82336	4.45753	1.57522	1.18231	1.37876	2.73564	2.68121	2.70843	0.509604	0.0350095	0.216377	0.129854	Y	N	0	1	0	1
YOR147W	2.04585	1.85514	1.95049	0.78761	0.88673	0.83717	1.21584	2.68121	1.94852	0.367331	0.0223018	0.000438402	0.496364	Y	N	0	0	1	1
YOR219C	11.5931	10.0177	10.8054	5.51327	4.72923	5.12125	5.47128	4.28994	4.88061	0.324267	0.0472701	0.345169	0.0530124	Y	N	0	1	0	1
YOR317W	10.9112	11.5018	11.2065	4.72566	4.72923	4.72744	6.38316	8.04363	7.21339	0.374844	0.0289925	0.191331	0.0256163	Y	N	0	1	2	3
YPL012W	15.0029	15.5831	15.293	7.08849	6.20711	6.6478	10.3346	15.551	12.9428	0.361815	0.00670211	0.0724641	0.567318	Y	N	0	0	1	1
YPL014W	2.04585	1.85514	1.95049	0.78761	0.591154	0.689382	1.21584	2.68121	1.94852	0.451685	0.0116122	0.000438402	0.496364	Y	N	0	1	0	1
YPL074W	3.40975	4.0813	3.74552	0.78761	1.47788	1.13275	1.21584	2.14497	1.6804	0.51938	0.0323803	0.348099	0.0571012	Y	N	0	0	1	1
YPL105C	10.2292	10.0177	10.1235	3.15044	3.25134	3.20089	7.599	5.89866	6.74883	0.500059	0.002119	0.176102	0.0575411	Y	N	0	0	1	1
YPL240C	56.6018	52.6859	54.6439	25.2035	29.2621	27.2328	30.7	51.4792	41.0896	0.302449	0.0104615	0.123809	0.332605	Y	N	0	1	0	1
YPR138C	47.7365	41.5551	44.6458	7.8761	14.4833	11.1797	12.7663	15.551	14.1587	0.601351	0.0180048	0.498758	0.0549582	Y	N	0	1	0	1
YPR148C	5.4556	5.19438	5.32499	2.36283	1.77346	2.06815	4.86336	5.89866	5.38101	0.410738	0.0293117	-0.00454508	0.423182	Y	N	0	1	0	1
YPR204C-A	2.7278	2.59719	2.66249	0.78761	0.88673	0.83717	0.30396	1.60873	0.956343	0.502475	0.00280905	0.444675	0.136309	Y	N	0	0	0	0
YPR091C	2.7278	2.22616	2.47698	0.78761	1.18231	0.984958	2.73564	3.21745	2.97655	0.400505	0.0474441	-0.0797899	0.203163	Y	N	0	0	0	0
YPR042C	8.86534	8.90466	8.885	3.15044	3.54692	3.34868	4.86336	10.1886	7.52598	0.423784	0.0215327	0.0720945	0.98675	Y	N	0	0	0	0
YPR034W	4.0917	4.45233	4.27201	1.57522	0.88673	1.23098	3.0396	4.28994	3.66477	0.540383	0.0334475	0.0665861	0.517874	Y	N	0	0	0	0
YPL169C	6.8195	5.93644	6.37797	1.57522	2.06904	1.82213	3.34356	3.75369	3.54863	0.544103	0.024489	0.254622	0.0884139	Y	N	0	0	0	0
YPL163C	1.3639	1.48411	1.424	0.78761	0.591154	0.689382	0.91188	1.07248	0.992182	0.315052	0.0369538	0.15692	0.0432585	Y	N	0	0	0	0
YPL042C	3.40975	3.33925	3.3745	0.78761	1.18231	0.984958	1.5198	3.75369	2.63675	0.534791	0.0461087	0.107141	0.802294	Y	N	0	0	0	0
YOR192C-A	10.2292	8.53363	9.38144	2.36283	3.8425	3.10266	10.9426	6.4349	8.68873	0.480535	0.0319101	0.0333129	0.334308	Y	N	0	0	0	0
YOR152C	2.04585	1.85514	1.95049	0.78761	0.88673	0.83717	1.21584	1.07248	1.14416	0.367331	0.0223018	0.231657	0.0459644	Y	N	0	0	0	0
YOR130C	2.04585	2.22616	2.13601	0.78761	0.88673	0.83717	1.5198	3.75369	2.63675	0.406789	0.0149694	-0.0914659	0.302736	Y	N	0	0	0	0
YOR067C	2.7278	2.22616	2.47698	0.78761	1.18231	0.984958	3.95148	3.21745	3.58447	0.400505	0.0474441	-0.160502	0.107539	Y	N	0	0	0	0
YOL126C	5.4556	4.45233	4.95396	2.36283	1.47788	1.92036	3.0396	5.36242	4.20101	0.411571	0.0466598	0.071599	0.84363	Y	N	0	0	0	0
YOL103W	5.4556	4.82336	5.13948	1.57522	2.06904	1.82213	4.5594	4.28994	4.42467	0.45034	0.016895	0.0650382	0.23249	Y	N	0	0	0	0
YOL051W	16.3668	13.728	15.0474	3.93805	5.91154	4.92479	6.68712	6.4349	6.56101	0.485074	0.0305514	0.360491	0.0968362	Y	N	0	0	0	0
YOL049W	4.77365	4.45233	4.61299	1.57522	2.06904	1.82213	2.12772	5.36242	3.74507	0.403403	0.017496	0.0905224	0.953674	Y	N	0	0	0	0
YOL016C	21.8224	24.1168	22.9696	7.08849	8.27615	7.68232	11.8544	12.8698	12.3621	0.475661	0.0184196	0.26906	0.0593976	Y	N	0	0	0	0
YNR020C	1.3639	1.48411	1.424	0.78761	0.591154	0.689382	1.21584	0.536242	0.876041	0.315052	0.0369538	0.210987	0.117602	Y	N	0	0	0	0
YNR013C	10.2292	9.27568	9.75246	3.15044	4.72923	3.93983	4.25544	6.97114	5.61329	0.393636	0.0383329	0.239897	0.063666	Y	N	0	0	0	0
YNL339C	46.3726	40.442	43.4073	8.66371	11.5275	10.0956	8.81484	8.57987	8.69736	0.63343	0.025911	0.698175	0.054078	Y	N	0	0	0	0
YNL221C	13.639	12.2439	12.9414	3.93805	4.43365	4.18585	4.25544	4.28994	4.27269	0.490199	0.0310439	0.481282	0.0511346	Y	N	0	0	0	0
YNL189W	5.4556	5.93644	5.69602	2.36283	2.36461	2.36372	8.20692	10.7248	9.46588	0.381975	0.045849	-0.22059	0.0610122	Y	N	0	0	0	0
YNL168C	2.7278	2.22616	2.47698	0.78761	1.18231	0.984958	0.60792	0.536242	0.572081	0.400505	0.0474441	0.636465	0.0812353	Y	N	0	0	0	0
YNL139C	27.9599	23.0037	25.4818	7.8761	5.32038	6.59824	7.90296	10.7248	9.3139	0.586802	0.0422617	0.437099	0.0816536	Y	N	0	0	0	0
YNL091W	15.6848	13.357	14.5209	6.30088	5.0248	5.66284	6.99108	7.50739	7.24923	0.408959	0.0399032	0.301702	0.0994007	Y	N	0	0	0	0
YNL041C	3.40975	3.71027	3.56001	1.57522	1.47788	1.52655	4.86336	7.50739	6.18537	0.36774	0.0306118	-0.239915	0.112288	Y	N	0	0	0	0
YNL006W	5.4556	6.30747	5.88153	1.57522	2.36461	1.96992	5.77524	2.14497	3.9601	0.475042	0.0216545	0.171784	0.153468	Y	N	0	0	0	0
YMR317W	46.3726	41.9261	44.1493	7.8761	16.8479	12.362	13.9822	33.7832	23.8827	0.552836	0.0486969	0.266841	0.157145	Y	N	0	0	0	0
YMR287C	5.4556	4.45233	4.95396	0.78761	1.77346	1.28054	2.12772	2.68121	2.40446	0.587561	0.034777	0.313934	0.110706	Y	N	0	0	0	0
YMR280C	15.6848	13.357	14.5209	5.51327	4.43365	4.97346	4.86336	5.89866	5.38101	0.465335	0.0421486	0.43113	0.0711664	Y	N	0	0	0	0
YMR197C	1.3639	1.48411	1.424	0.78761	0.591154	0.689382	1.5198	2.68121	2.1005	0.315052	0.0369538	-0.168812	0.173493	Y	N	0	0	0	0
YMR163C	2.04585	1.85514	1.95049	0.78761	0.591154	0.689382	0.60792	1.60873	1.10832	0.451685	0.0116122	0.245478	0.223959	Y	N	0	0	0	0
YMR124W	6.13755	7.42055	6.77905	3.15044	2.36461	2.75753	5.16732	5.36242	5.26487	0.390649	0.0489774	0.109781	0.261088	Y	N	0	0	0	0
YMR049C	7.50145	6.67849	7.08997	3.15044	3.8425	3.49647	4.86336	4.82618	4.84477	0.307015	0.0233171	0.165371	0.114776	Y	N	0	0	0	0
YMR013W-A	2.7278	3.33925	3.03352	0.78761	1.18231	0.984958	0.60792	0.536242	0.572081	0.488529	0.0422935	0.72449	0.0772201	Y	N	0	0	0	0
YML029W	8.1834	7.79157	7.98748	3.93805	3.25134	3.5947	4.25544	6.97114	5.61329	0.346748	0.0170398	0.153192	0.222016	Y	N	0	0	0	0
YLR449W	2.04585	1.85514	1.95049	0.78761	0.591154	0.689382	2.43168	1.07248	1.75208	0.451685	0.0116122	0.0465899	0.344758	Y	N	0	0	0	0
YLR410W-A	10.2292	9.64671	9.93798	2.36283	3.25134	2.80709	9.1188	5.89866	7.50873	0.549042	0.00952391	0.121731	0.123755	Y	N	0	0	0	0
YLR386W	4.0917	3.71027	3.90099	1.57522	1.18231	1.37876	2.73564	3.21745	2.97655	0.451685	0.0116122	0.117462	0.0898123	Y	N	0	0	0	0
YLR369W	4.0917	4.45233	4.27201	0.78761	0.591154	0.689382	2.43168	2.68121	2.55644	0.792173	0.00925867	0.222996	0.046687	Y	N	0	0	0	0
YLR357W	5.4556	5.56541	5.5105	1.57522	1.18231	1.37876	3.0396	3.21745	3.12853	0.601702	0.0204355	0.245852	0.00115638	Y	N	0	0	0	0
YLR319C	2.7278	2.22616	2.47698	0.78761	1.18231	0.984958	1.82376	5.89866	3.86121	0.400505	0.0474441	-0.192801	0.240038	Y	N	0	0	0	0
YLR309C	4.77365	4.0813	4.42747	0.78761	1.77346	1.28054	4.5594	2.68121	3.62031	0.538765	0.0434938	0.0874109	0.171103	Y	N	0	0	0	0
YLR267W	1.3639	1.48411	1.424	0.78761	0.591154	0.689382	1.21584	2.68121	1.94852	0.315052	0.0369538	-0.136195	0.241024	Y	N	0	0	0	0
YKR101W	2.04585	1.85514	1.95049	0.78761	0.591154	0.689382	1.82376	2.14497	1.98436	0.451685	0.0116122	-0.00747698	0.458822	Y	N	0	0	0	0
YKR090W	3.40975	3.33925	3.3745	1.57522	1.47788	1.52655	2.12772	2.14497	2.13634	0.344498	0.00173522	0.198538	0.0165741	Y	N	0	0	0	0
YKR025W	2.04585	2.22616	2.13601	0.78761	0.88673	0.83717	1.82376	1.60873	1.71624	0.406789	0.0149694	0.0950238	0.0658286	Y	N	0	0	0	0
YKR018C	18.4126	14.4701	16.4414	2.36283	5.61596	3.98939	11.5505	11.7973	11.6739	0.615031	0.0425101	0.148722	0.252268	Y	N	0	0	0	0
YJR039W	8.86534	10.7598	9.81257	4.72566	2.95577	3.84071	3.64752	10.7248	7.18618	0.407371	0.0444139	0.135285	0.721743	Y	N	0	0	0	0
YJL181W	1.3639	1.48411	1.424	0.78761	0.591154	0.689382	0.91188	0.536242	0.724061	0.315052	0.0369538	0.293736	0.0290043	Y	N	0	0	0	0
YJL149W	2.7278	2.22616	2.47698	0.78761	1.18231	0.984958	2.12772	1.60873	1.86822	0.400505	0.0474441	0.122494	0.160236	Y	N	0	0	0	0
YJL128C	4.77365	4.82336	4.7985	1.57522	1.47788	1.52655	4.25544	1.60873	2.93208	0.497394	0.00169755	0.213929	0.162529	Y	N	0	0	0	0
YJL108C	1.3639	1.48411	1.424	0.78761	0.591154	0.689382	0.91188	1.07248	0.992182	0.315052	0.0369538	0.15692	0.0432585	Y	N	0	0	0	0
YJL054W	4.0917	3.33925	3.71547	0.78761	1.18231	0.984958	3.95148	3.21745	3.58447	0.576596	0.0446678	0.0155895	0.555207	Y	N	0	0	0	0
YJL041W	13.639	13.728	13.6835	5.51327	4.13807	4.82567	8.20692	10.1886	9.19776	0.452639	0.0484534	0.172515	0.0765723	Y	N	0	0	0	0
YIL165C	1.3639	1.48411	1.424	0.78761	0.591154	0.689382	0.91188	1.60873	1.2603	0.315052	0.0369538	0.0530364	0.962328	Y	N	0	0	0	0
YIL143C	9.54729	7.42055	8.48392	0.78761	2.06904	1.42832	3.95148	3.21745	3.58447	0.77377	0.0453304	0.374172	0.122751	Y	N	0	0	0	0
YIL126W	15.6848	14.099	14.8919	2.36283	3.8425	3.10266	6.38316	8.57987	7.48152	0.681217	0.00849585	0.298962	0.0259755	Y	N	0	0	0	0
YIL088C	3.40975	2.96822	3.18898	1.57522	1.18231	1.37876	3.95148	3.21745	3.58447	0.364163	0.0264658	-0.0507722	0.539384	Y	N	0	0	0	0
YIL055C	4.0917	3.33925	3.71547	0.78761	1.47788	1.13275	1.5198	3.21745	2.36863	0.515881	0.0374898	0.195518	0.247144	Y	N	0	0	0	0
YIL006W	1.3639	1.48411	1.424	0.78761	0.591154	0.689382	0.60792	1.07248	0.840202	0.315052	0.0369538	0.229128	0.105068	Y	N	0	0	0	0
YHR182W	2.7278	2.96822	2.84801	1.57522	1.18231	1.37876	0.60792	3.21745	1.91269	0.315052	0.0369538	0.172898	0.739726	Y	N	0	0	0	0
YHR164C	9.54729	8.1626	8.85495	4.72566	3.54692	4.13629	4.25544	3.21745	3.73645	0.330575	0.037081	0.374727	0.0541311	Y	N	0	0	0	0
YHR120W	4.0917	3.33925	3.71547	1.57522	0.88673	1.23098	0.91188	2.68121	1.79654	0.479765	0.0402613	0.315576	0.129235	Y	N	0	0	0	0
YHR079C	12.2751	12.6149	12.445	4.72566	5.32038	5.02302	9.1188	11.7973	10.4581	0.39403	0.0059072	0.0755441	0.285037	Y	N	0	0	0	0
YHR070W	2.04585	1.85514	1.95049	0.78761	0.88673	0.83717	1.82376	2.68121	2.25248	0.367331	0.0223018	-0.0625175	0.212832	Y	N	0	0	0	0
YHL047C	8.1834	8.1626	8.173	3.15044	3.8425	3.49647	5.47128	8.57987	7.02558	0.368752	0.0468361	0.0656995	0.716936	Y	N	0	0	0	0
YHL038C	2.7278	2.59719	2.66249	0.78761	0.591154	0.689382	0.91188	1.60873	1.2603	0.586829	0.00632689	0.324814	0.0611288	Y	N	0	0	0	0
YGR281W	36.8253	32.2794	34.5523	11.8141	8.57173	10.1929	17.9336	21.9859	19.9598	0.530178	0.0173892	0.238322	0.0671118	Y	N	0	0	0	0
YGR229C	5.4556	6.67849	6.06704	0.78761	2.06904	1.42832	5.16732	6.4349	5.80111	0.628151	0.0347334	0.019466	0.949643	Y	N	0	0	0	0
YGR179C	1.3639	1.48411	1.424	0.78761	0.591154	0.689382	0.91188	1.60873	1.2603	0.315052	0.0369538	0.0530364	0.962328	Y	N	0	0	0	0
YGR170W	10.9112	8.90466	9.90793	2.36283	4.13807	3.25045	2.12772	6.4349	4.28131	0.484039	0.0393354	0.364406	0.0911993	Y	N	0	0	0	0
YGR103W	3.40975	3.33925	3.3745	1.57522	1.77346	1.67434	6.0792	2.68121	4.38021	0.304365	0.0210354	-0.113285	0.884247	Y	N	0	0	0	0
YGR079W	8.1834	8.90466	8.54403	3.93805	3.25134	3.5947	5.47128	6.97114	6.22121	0.376	0.0100506	0.137788	0.0646606	Y	N	0	0	0	0
YGR041W	4.0917	3.71027	3.90099	0.78761	0.295577	0.541593	2.12772	3.21745	2.67259	0.857501	0.0104126	0.164243	0.116431	Y	N	0	0	0	0
YGL228W	6.13755	5.56541	5.85148	1.57522	2.66019	2.11771	4.25544	4.28994	4.27269	0.4414	0.0480676	0.136564	0.114459	Y	N	0	0	0	0
YGL227W	8.86534	10.0177	9.44154	3.93805	4.43365	4.18585	2.43168	2.68121	2.55644	0.353259	0.0392048	0.567406	0.0511535	Y	N	0	0	0	0
YGL181W	2.7278	2.96822	2.84801	1.57522	1.18231	1.37876	2.73564	2.14497	2.4403	0.315052	0.0369538	0.0670974	0.104992	Y	N	0	0	0	0
YGL175C	1.3639	1.48411	1.424	0.78761	0.591154	0.689382	0.60792	1.07248	0.840202	0.315052	0.0369538	0.229128	0.105068	Y	N	0	0	0	0
YGL151W	7.50145	6.30747	6.90446	0.78761	2.36461	1.57611	3.34356	6.4349	4.88923	0.641542	0.0381263	0.149889	0.338062	Y	N	0	0	0	0
YGL148W	9.54729	8.1626	8.85495	4.72566	3.25134	3.9885	6.68712	9.65235	8.16974	0.346376	0.0408893	0.0349779	0.960944	Y	N	0	0	0	0
YFR029W	4.77365	4.0813	4.42747	1.57522	0.88673	1.23098	1.5198	1.60873	1.56426	0.555907	0.0225425	0.451846	0.0761351	Y	N	0	0	0	0
YFL033C	33.4155	27.456	30.4358	11.8141	7.98057	9.89736	7.90296	7.50739	7.70517	0.487865	0.0404776	0.596602	0.0823339	Y	N	0	0	0	0
YER190W	38.8711	31.5373	35.2042	3.15044	7.98057	5.56551	9.72672	8.57987	9.1533	0.80109	0.0304562	0.585017	0.0864263	Y	N	0	0	0	0
YER167W	10.2292	8.53363	9.38144	2.36283	3.54692	2.95488	3.34356	6.4349	4.88923	0.50173	0.0324743	0.283029	0.0843432	Y	N	0	0	0	0
YER147C	3.40975	3.33925	3.3745	0.78761	1.18231	0.984958	1.82376	2.68121	2.25248	0.534791	0.0461087	0.175547	0.139714	Y	N	0	0	0	0
YER137C-A	54.556	48.2336	51.3948	20.4779	12.1186	16.2983	31.6118	41.8269	36.7194	0.498778	0.0258328	0.146024	0.101514	Y	N	0	0	0	0
YER100W	3.40975	4.0813	3.74552	0.78761	1.47788	1.13275	4.25544	5.36242	4.80893	0.51938	0.0323803	-0.108536	0.095363	Y	N	0	0	0	0
YER098W	2.7278	2.96822	2.84801	0.78761	1.18231	0.984958	1.21584	2.68121	1.94852	0.461123	0.0254745	0.164835	0.367747	Y	N	0	0	0	0
YER060W	7.50145	6.67849	7.08997	1.57522	2.36461	1.96992	0.91188	3.75369	2.33279	0.556196	0.0122412	0.482769	0.0592451	Y	N	0	0	0	0
YEL058W	6.8195	7.04952	6.93451	2.36283	2.06904	2.21593	3.95148	6.4349	5.19319	0.495459	0.00206927	0.125581	0.314482	Y	N	0	0	0	0
YDR387C	2.7278	2.96822	2.84801	1.57522	1.18231	1.37876	1.82376	2.14497	1.98436	0.315052	0.0369538	0.15692	0.0432585	Y	N	0	0	0	0
YDR381W	9.54729	10.3888	9.96803	2.36283	3.25134	2.80709	4.86336	5.36242	5.11289	0.550353	0.00729968	0.289943	0.0405697	Y	N	0	0	0	0
YDR333C	4.77365	5.19438	4.98402	2.36283	2.06904	2.21593	3.34356	4.28994	3.81675	0.352023	0.0123574	0.115886	0.100447	Y	N	0	0	0	0
YDR316W-A	55.9199	49.7177	52.8188	8.66371	13.5965	11.1301	30.396	31.6383	31.0171	0.676288	0.0105311	0.231187	0.0885275	Y	N	0	0	0	0
YDR300C	4.0917	3.71027	3.90099	1.57522	1.77346	1.67434	3.0396	2.14497	2.59228	0.367331	0.0223018	0.177492	0.0367314	Y	N	0	0	0	0
YDR283C	15.0029	13.728	14.3655	3.93805	6.20711	5.07258	3.64752	9.11611	6.38182	0.45209	0.0347965	0.352375	0.086472	Y	N	0	0	0	0
YDR274C	9.54729	10.0177	9.78252	1.57522	2.66019	2.11771	6.0792	5.36242	5.72081	0.664585	0.0215369	0.232993	0.00631388	Y	N	0	0	0	0
YDR244W	7.50145	7.42055	7.461	2.36283	1.77346	2.06815	4.5594	5.36242	4.96091	0.557216	0.0316927	0.177235	0.0472971	Y	N	0	0	0	0
YDR217C	10.2292	11.8729	11.0511	0.78761	3.54692	2.16727	3.34356	3.75369	3.54863	0.707492	0.0479633	0.493344	0.0666815	Y	N	0	0	0	0
YDR210C-C	42.2809	41.184	41.7325	9.45132	13.0054	11.2283	29.1802	25.7396	27.4599	0.570158	0.0239669	0.181775	0.00851961	Y	N	0	0	0	0
YDR200C	3.40975	2.96822	3.18898	1.57522	1.18231	1.37876	2.43168	3.21745	2.82457	0.364163	0.0264658	0.0527006	0.62774	Y	N	0	0	0	0
YDR170W-A	19.0946	21.5196	20.3071	5.51327	5.91154	5.7124	16.4138	17.1597	16.7868	0.550829	0.0473159	0.0826799	0.215289	Y	N	0	0	0	0
YDR097C	4.77365	5.19438	4.98402	1.57522	2.36461	1.96992	2.73564	4.28994	3.51279	0.403131	0.0408003	0.151927	0.170198	Y	N	0	0	0	0
YDL142C	2.04585	1.85514	1.95049	0.78761	0.88673	0.83717	1.82376	2.14497	1.98436	0.367331	0.0223018	-0.00747698	0.458822	Y	N	0	0	0	0
YCR048W	25.9141	21.1486	23.5313	10.2389	7.09384	8.66639	14.894	12.8698	13.8819	0.433808	0.0468747	0.229197	0.133953	Y	N	0	0	0	0
YCL051W	3.40975	2.96822	3.18898	0.78761	0.591154	0.689382	0.60792	2.68121	1.64456	0.665193	0.028234	0.287601	0.266738	Y	N	0	0	0	0
YCL045C	8.1834	9.27568	8.72954	4.72566	3.8425	4.28408	4.86336	7.50739	6.18537	0.309134	0.0267131	0.149625	0.163729	Y	N	0	0	0	0
YCL020W	12.2751	10.7598	11.5174	3.15044	1.77346	2.46195	5.47128	6.97114	6.22121	0.670077	0.0128966	0.267481	0.0551837	Y	N	0	0	0	0
YCL010C	6.13755	7.04952	6.59353	1.57522	1.18231	1.37876	1.82376	1.60873	1.71624	0.679628	0.0288774	0.584539	0.0556356	Y	N	0	0	0	0
YBR235W	7.50145	7.79157	7.64651	3.15044	2.36461	2.75753	6.0792	6.97114	6.52517	0.442944	0.0302998	0.0688712	0.0953587	Y	N	0	0	0	0
YBR168W	2.04585	2.22616	2.13601	0.78761	0.591154	0.689382	1.21584	1.07248	1.14416	0.491143	0.00860352	0.271115	0.0315568	Y	N	0	0	0	0
YBR131W	2.04585	1.85514	1.95049	0.78761	0.591154	0.689382	0.91188	1.07248	0.992182	0.451685	0.0116122	0.293553	0.0372216	Y	N	0	0	0	0
YBR103W	3.40975	3.71027	3.56001	0.78761	0.591154	0.689382	2.73564	1.60873	2.17218	0.712992	0.00710003	0.214555	0.0593448	Y	N	0	0	0	0
YBR045C	1.3639	1.48411	1.424	0.78761	0.591154	0.689382	0.30396	1.07248	0.688222	0.315052	0.0369538	0.315783	0.191865	Y	N	0	0	0	0
YBR017C	6.8195	7.42055	7.12002	2.36283	3.25134	2.80709	4.5594	4.82618	4.69279	0.404225	0.0217461	0.18105	0.0690054	Y	N	0	0	0	0
YBL113C	15.0029	12.6149	13.8089	5.51327	3.25134	4.38231	2.43168	3.75369	3.09269	0.498457	0.0293094	0.649823	0.0566288	Y	N	0	0	0	0
YBL105C	21.8224	18.9224	20.3724	8.66371	10.3452	9.50445	7.29504	8.04363	7.66933	0.331115	0.0387072	0.424284	0.0693681	Y	N	0	0	0	0
YBL100W-B	77.0603	62.3326	69.6965	16.5398	24.5329	20.5363	63.8316	49.8705	56.8511	0.530688	0.0490439	0.0884721	0.231379	Y	N	0	0	0	0
YBL097W	2.04585	2.22616	2.13601	0.78761	0.591154	0.689382	0.91188	2.14497	1.52842	0.491143	0.00860352	0.145359	0.503548	Y	N	0	0	0	0
YAR035W	3.40975	3.71027	3.56001	1.57522	1.47788	1.52655	1.82376	2.14497	1.98436	0.36774	0.0306118	0.25383	0.0273542	Y	N	0	0	0	0
YAL032C	2.7278	2.96822	2.84801	0.78761	0.295577	0.541593	1.5198	1.60873	1.56426	0.720868	0.0331004	0.260232	0.0531883	Y	N	0	0	0	0
tW(CCA)P	85.9257	74.5765	80.2511	27.5663	33.6957	30.631	59.8801	67.5665	63.7233	0.418289	0.0328472	0.100153	0.209115	Y	N	0	0	0	0
tP(UGG)N2	21.1404	18.1803	19.6604	3.93805	7.685	5.81152	17.3257	10.7248	14.0253	0.529302	0.0320431	0.146681	0.0827152	Y	N	0	0	0	0
tK(CUU)J	1.3639	1.48411	1.424	0.78761	0.591154	0.689382	0.91188	1.60873	1.2603	0.315052	0.0369538	0.0530364	0.962328	Y	N	0	0	0	0
tI(AAU)L1	12.2751	10.7598	11.5174	6.30088	4.43365	5.36727	13.0703	20.9134	16.9919	0.331603	0.039382	-0.168885	0.129305	Y	N	0	0	0	0
tG(GCC)J2	3.40975	2.96822	3.18898	0.78761	0.295577	0.541593	2.73564	3.21745	2.97655	0.769979	0.0157529	0.0299397	0.758333	Y	N	0	0	0	0
tE(UUC)G2	8.1834	7.42055	7.80197	3.15044	3.8425	3.49647	8.81484	10.1886	9.50172	0.348575	0.0144042	-0.0855978	0.0587354	Y	N	0	0	0	0
tD(GUC)J2	8.86534	7.79157	8.32846	4.72566	3.54692	4.13629	7.29504	4.28994	5.79249	0.303954	0.0349482	0.1577	0.0815869	Y	N	0	0	0	0
R0020C	28.6419	31.5373	30.0896	13.3894	15.0744	14.2319	20.6693	25.7396	23.2044	0.325154	0.0212027	0.112845	0.10207	Y	N	0	0	0	0
snR46	64.7852	64.1877	64.4865	31.5044	18.9169	25.2107	13.6782	16.0873	14.8827	0.407884	0.100515	0.636786	0.00139102	N	Y	1	1	2	4
snR80	40.235	43.7812	42.0081	26.7787	19.8036	23.2912	23.101	16.0873	19.5941	0.256142	0.0709049	0.331208	0.0104839	N	Y	2	1	1	4
YAL021C	10.9112	11.1308	11.021	6.30088	6.20711	6.254	4.5594	5.89866	5.22903	0.246064	0.00482517	0.3238	0.0242078	N	Y	0	0	1	1
YBL047C	31.3697	37.4738	34.4217	14.177	13.0054	13.5912	19.1495	11.2611	15.2053	0.403576	0.0831877	0.354838	0.0398639	N	Y	0	1	0	1
YCR065W	6.13755	6.30747	6.22251	3.93805	2.95577	3.44691	1.82376	1.07248	1.44812	0.256536	0.103242	0.63316	0.00855604	N	Y	0	1	0	1
YDR104C	5.4556	5.93644	5.69602	3.15044	2.66019	2.90532	1.82376	3.21745	2.52061	0.292378	0.0148181	0.354066	0.0291244	N	Y	1	1	0	2
YGL173C	45.6906	44.8943	45.2925	9.45132	15.6656	12.5584	15.502	16.0873	15.7946	0.55709	0.0565993	0.457517	0.00321662	N	Y	1	2	1	4
YGR097W	20.4585	22.2616	21.3601	11.0265	10.6408	10.8337	9.42276	10.1886	9.80568	0.294828	0.0454177	0.338125	0.0419122	N	Y	0	0	2	2
YGR130C	11.5931	13.357	12.4751	3.15044	6.20711	4.67878	3.64752	7.50739	5.57745	0.425911	0.0702402	0.349607	0.0459642	N	Y	1	0	0	1
YHR082C	17.7307	19.6645	18.6976	8.66371	8.8673	8.76551	10.3346	7.50739	8.92101	0.329008	0.059254	0.321371	0.0166652	N	Y	0	1	0	1
YIL038C	9.54729	10.0177	9.78252	2.36283	5.61596	3.98939	4.5594	4.82618	4.69279	0.389544	0.168007	0.31902	0.0198594	N	Y	0	1	2	3
YJL216C	1.3639	1.48411	1.424	0.78761	0.88673	0.83717	0.30396	0.536242	0.420101	0.230698	0.0189463	0.530158	0.00775017	N	Y	0	0	1	1
YKL048C	2.04585	1.85514	1.95049	1.57522	0.591154	1.08319	0.91188	0.536242	0.724061	0.255441	0.320391	0.430369	0.0101268	N	Y	0	0	1	1
YKL215C	12.2751	12.2439	12.2595	1.57522	4.43365	3.00444	3.95148	5.36242	4.65695	0.61071	0.0975061	0.420371	0.0306393	N	Y	0	0	1	1
YKR095W	30.0058	24.8588	27.4323	12.6018	11.5275	12.0646	6.68712	3.21745	4.95229	0.356748	0.0941314	0.743457	0.0481524	N	Y	0	1	1	2
YLL016W	7.50145	7.42055	7.461	2.36283	0.88673	1.62478	2.73564	1.60873	2.17218	0.662002	0.079299	0.5359	0.0289939	N	Y	0	0	1	1
YLR247C	19.7765	20.0355	19.906	6.30088	11.2319	8.7664	6.68712	6.4349	6.56101	0.356163	0.137825	0.482013	0.00103305	N	Y	0	3	0	3
YMR246W	91.3812	96.4671	93.9242	44.8938	51.1348	48.0143	39.8188	41.2906	40.5547	0.291407	0.00875471	0.364736	0.0274031	N	Y	0	0	2	2
YOR138C	8.1834	10.0177	9.10057	3.93805	5.61596	4.777	5.77524	2.68121	4.22823	0.279913	0.0744712	0.33291	0.0446553	N	Y	1	0	0	1
YOR162C	6.8195	6.30747	6.56348	3.93805	1.77346	2.85576	1.82376	3.21745	2.52061	0.361413	0.165202	0.415629	0.0172749	N	Y	0	0	1	1
YPR202W	8.86534	8.1626	8.51397	4.72566	3.8425	4.28408	0.91188	2.68121	1.79654	0.298275	0.0198408	0.675694	0.00952521	N	Y	0	0	0	0
YPR075C	4.77365	4.45233	4.61299	0.78761	3.54692	2.16727	1.5198	2.14497	1.83238	0.32807	0.323855	0.400966	0.00723577	N	Y	0	0	0	0
YPL283C	40.235	42.2971	41.2661	15.7522	7.98057	11.8664	6.0792	6.4349	6.25705	0.541275	0.0675571	0.819223	0.0179518	N	Y	0	0	0	0
YPL045W	5.4556	5.56541	5.5105	3.15044	0.591154	1.8708	3.0396	2.14497	2.59228	0.469165	0.214673	0.327509	0.0349788	N	Y	0	0	0	0
YOR330C	16.3668	15.5831	15.975	7.8761	4.13807	6.00709	5.47128	6.4349	5.95309	0.424776	0.106038	0.428697	0.0050771	N	Y	0	0	0	0
YOR093C	7.50145	7.79157	7.64651	1.57522	3.8425	2.70886	3.0396	4.28994	3.66477	0.450677	0.138782	0.319417	0.0255616	N	Y	0	0	0	0
YOR025W	2.04585	1.85514	1.95049	0.78761	0.295577	0.541593	0.30396	0.536242	0.420101	0.556471	0.0776434	0.666791	0.0114108	N	Y	0	0	0	0
YOL141W	4.77365	4.82336	4.7985	1.57522	3.54692	2.56107	1.5198	0.536242	1.02802	0.272684	0.264035	0.669104	0.0371071	N	Y	0	0	0	0
YOL015W	2.04585	1.85514	1.95049	1.57522	0.295577	0.935398	0.60792	1.07248	0.840202	0.319148	0.353546	0.365761	0.0242641	N	Y	0	0	0	0
YOL001W	2.04585	1.85514	1.95049	0.78761	0.295577	0.541593	0.91188	0.536242	0.724061	0.556471	0.0776434	0.430369	0.0101268	N	Y	0	0	0	0
YNR070W	6.8195	7.04952	6.93451	1.57522	2.66019	2.11771	2.73564	2.14497	2.4403	0.51515	0.0612644	0.453572	0.00217134	N	Y	0	0	0	0
YNL054W	9.54729	11.8729	10.7101	3.93805	2.95577	3.44691	5.77524	2.68121	4.22823	0.492363	0.065723	0.403635	0.0466293	N	Y	0	0	0	0
YMR279C	6.8195	6.30747	6.56348	3.93805	2.66019	3.29912	2.12772	1.60873	1.86822	0.298736	0.0879511	0.545705	0.0113878	N	Y	0	0	0	0
YMR086W	15.0029	13.728	14.3655	3.15044	5.91154	4.53099	6.0792	5.36242	5.72081	0.501126	0.0514193	0.399862	0.0329629	N	Y	0	0	0	0
YML082W	8.86534	7.42055	8.14295	3.15044	3.25134	3.20089	2.12772	3.75369	2.94071	0.405511	0.0910662	0.44233	0.0479503	N	Y	0	0	0	0
YML035C	12.2751	13.357	12.816	4.72566	7.38942	6.05754	6.0792	4.82618	5.45269	0.325458	0.0880497	0.371143	0.0141479	N	Y	0	0	0	0
YML032C	2.7278	2.59719	2.66249	1.57522	1.18231	1.37876	1.21584	0.536242	0.876041	0.285799	0.0720396	0.482764	0.0321842	N	Y	0	0	0	0
YLR467C-A	2.7278	2.59719	2.66249	1.57522	1.18231	1.37876	0.60792	0.536242	0.572081	0.285799	0.0720396	0.667831	0.0126629	N	Y	0	0	0	0
YLR465C	2.7278	2.59719	2.66249	1.57522	1.18231	1.37876	0.30396	0.536242	0.420101	0.285799	0.0720396	0.801935	0.0017113	N	Y	0	0	0	0
YLR463C	4.0917	4.45233	4.27201	0.78761	1.77346	1.28054	0.91188	1.60873	1.2603	0.523241	0.0747238	0.530158	0.00775017	N	Y	0	0	0	0
YLR219W	7.50145	7.79157	7.64651	3.15044	2.06904	2.60974	2.12772	2.68121	2.40446	0.466866	0.0531682	0.502445	0.00155721	N	Y	0	0	0	0
YLL018C-A	3.40975	2.96822	3.18898	1.57522	0.88673	1.23098	0.91188	0.536242	0.724061	0.413403	0.0555031	0.643877	0.0287613	N	Y	0	0	0	0
YKR097W	2.7278	2.59719	2.66249	0.78761	1.47788	1.13275	1.21584	1.07248	1.14416	0.371156	0.131001	0.366801	0.00690816	N	Y	0	0	0	0
YKL098W	2.04585	2.22616	2.13601	1.57522	1.47788	1.52655	0.60792	0.536242	0.572081	0.145891	0.0483621	0.572145	0.0300318	N	Y	0	0	0	0
YKL092C	3.40975	3.33925	3.3745	3.93805	1.77346	2.85576	1.82376	1.07248	1.44812	0.0724881	0.71546	0.367404	0.04918	N	Y	0	0	0	0
YJR129C	1.3639	1.48411	1.424	0.78761	0.88673	0.83717	0.60792	0.536242	0.572081	0.230698	0.0189463	0.396054	0.0300927	N	Y	0	0	0	0
YJR092W	8.86534	8.53363	8.69949	1.57522	4.13807	2.85665	3.95148	3.21745	3.58447	0.483637	0.132476	0.385069	0.00228046	N	Y	0	0	0	0
YJL114W	8.86534	7.79157	8.32846	2.36283	4.13807	3.25045	1.82376	3.21745	2.52061	0.408621	0.0570995	0.51906	0.0209855	N	Y	0	0	0	0
YJL083W	6.8195	7.04952	6.93451	4.72566	0.88673	2.80619	1.21584	1.60873	1.41228	0.392898	0.2761	0.691094	0.000893678	N	Y	0	0	0	0
YJL077C	4.0917	4.82336	4.45753	1.57522	1.47788	1.52655	1.82376	1.07248	1.44812	0.465382	0.0746113	0.488289	0.034726	N	Y	0	0	0	0
YIR016W	2.7278	2.22616	2.47698	1.57522	1.18231	1.37876	1.21584	0.536242	0.876041	0.254433	0.0809298	0.451398	0.0374473	N	Y	0	0	0	0
YHR150W	3.40975	3.71027	3.56001	1.57522	3.25134	2.41328	1.21584	1.60873	1.41228	0.168843	0.396511	0.40153	0.0126364	N	Y	0	0	0	0
YHR133C	1.3639	1.48411	1.424	0.78761	0.295577	0.541593	0.30396	0.536242	0.420101	0.419838	0.156539	0.530158	0.00775017	N	Y	0	0	0	0
YHR084W	4.0917	3.71027	3.90099	1.57522	2.66019	2.11771	2.43168	1.07248	1.75208	0.265309	0.157871	0.34762	0.0413619	N	Y	0	0	0	0
YHL032C	6.8195	7.79157	7.30554	7.8761	5.0248	6.45045	1.82376	2.68121	2.25248	0.0540619	0.656341	0.51099	0.0339752	N	Y	0	0	0	0
YGR270W	36.8253	36.7317	36.7785	9.45132	16.2567	12.854	11.5505	10.1886	10.8695	0.456555	0.0898893	0.529383	0.00713125	N	Y	0	0	0	0
YGR047C	5.4556	6.30747	5.88153	0.78761	2.36461	1.57611	1.82376	3.21745	2.52061	0.571903	0.0663059	0.367985	0.0345675	N	Y	0	0	0	0
YGL240W	2.7278	2.59719	2.66249	1.57522	1.47788	1.52655	1.21584	0.536242	0.876041	0.241577	0.00691601	0.482764	0.0321842	N	Y	0	0	0	0
YGL153W	2.04585	2.22616	2.13601	0.78761	0.295577	0.541593	0.91188	0.536242	0.724061	0.595929	0.0688384	0.469827	0.00743539	N	Y	0	0	0	0
YGL132W	1.3639	1.48411	1.424	0.78761	0.295577	0.541593	0.30396	0.536242	0.420101	0.419838	0.156539	0.530158	0.00775017	N	Y	0	0	0	0
YFR016C	12.2751	11.5018	11.8885	7.8761	3.54692	5.71151	3.34356	3.21745	3.28051	0.318375	0.205496	0.559185	0.0274812	N	Y	0	0	0	0
YFL066C	8.86534	10.3888	9.62706	1.57522	1.77346	1.67434	0.30396	1.07248	0.688222	0.75965	0.0570157	1.14576	0.0432477	N	Y	0	0	0	0
YER189W	1.3639	1.48411	1.424	0.78761	0.88673	0.83717	0.60792	0.536242	0.572081	0.230698	0.0189463	0.396054	0.0300927	N	Y	0	0	0	0
YER089C	7.50145	7.04952	7.27548	5.51327	2.95577	4.23452	3.64752	2.14497	2.89624	0.235058	0.245045	0.400027	0.0160756	N	Y	0	0	0	0
YER060W-A	6.13755	7.04952	6.59353	1.57522	3.25134	2.41328	0.60792	2.14497	1.37644	0.43651	0.0753401	0.68036	0.0161605	N	Y	0	0	0	0
YEL077W-A	2.04585	2.22616	2.13601	1.57522	0.591154	1.08319	0.60792	0.536242	0.572081	0.294899	0.269846	0.572145	0.0300318	N	Y	0	0	0	0
YEL076C	2.7278	2.59719	2.66249	0.78761	0.295577	0.541593	0.30396	0.536242	0.420101	0.691615	0.0583134	0.801935	0.0017113	N	Y	0	0	0	0
YDR545C-A	2.7278	2.96822	2.84801	2.36283	0.88673	1.62478	0.91188	0.536242	0.724061	0.243747	0.340056	0.594766	0.00589284	N	Y	0	0	0	0
YDR443C	15.0029	14.4701	14.7365	6.30088	2.95577	4.62832	3.95148	3.75369	3.85259	0.50297	0.0974641	0.582641	0.0124131	N	Y	0	0	0	0
YDR442W	2.04585	1.85514	1.95049	1.57522	0.591154	1.08319	0.30396	0.536242	0.420101	0.255441	0.320391	0.666791	0.0114108	N	Y	0	0	0	0
YDR334W	23.1863	20.0355	21.6109	5.51327	6.20711	5.86019	3.95148	6.4349	5.19319	0.566761	0.0532237	0.619238	0.0375583	N	Y	0	0	0	0
YDL203C	4.0917	3.33925	3.71547	0.78761	1.77346	1.28054	1.21584	0.536242	0.876041	0.462622	0.0658999	0.62749	0.0447362	N	Y	0	0	0	0
YDL144C	1.3639	1.48411	1.424	0.78761	1.47788	1.13275	0.60792	0.536242	0.572081	0.0993784	0.55193	0.396054	0.0300927	N	Y	0	0	0	0
YDL085W	2.04585	2.22616	2.13601	1.57522	0.591154	1.08319	1.21584	0.536242	0.876041	0.294899	0.269846	0.387078	0.0354522	N	Y	0	0	0	0
YCR073C	15.0029	15.9542	15.4785	1.57522	6.20711	3.89117	4.86336	8.04363	6.45349	0.59965	0.113894	0.379935	0.0224189	N	Y	0	0	0	0
YCL011C	9.54729	8.90466	9.22598	4.72566	1.77346	3.24956	3.34356	4.28994	3.81675	0.453188	0.14074	0.383319	0.00808248	N	Y	0	0	0	0
YBR114W	14.3209	12.2439	13.2824	6.30088	5.91154	6.10621	3.34356	7.50739	5.42547	0.337506	0.0825084	0.38884	0.043524	N	Y	0	0	0	0
YBR112C	10.2292	10.7598	10.4945	1.57522	4.43365	3.00444	5.77524	4.28994	5.03259	0.5432	0.110435	0.319171	0.00876411	N	Y	0	0	0	0
YBL013W	2.7278	2.22616	2.47698	0.78761	0.591154	0.689382	1.21584	0.536242	0.876041	0.555463	0.0584859	0.451398	0.0374473	N	Y	0	0	0	0
YAL041W	6.8195	6.30747	6.56348	1.57522	3.25134	2.41328	2.73564	3.21745	2.97655	0.434526	0.103427	0.343422	0.0205486	N	Y	0	0	0	0
YAL028W	4.77365	4.45233	4.61299	2.36283	0.88673	1.62478	0.91188	1.07248	0.992182	0.453188	0.14074	0.667391	0.0206588	N	Y	0	0	0	0
tQ(UUG)H	1.3639	1.48411	1.424	0.78761	0.88673	0.83717	0.30396	0.536242	0.420101	0.230698	0.0189463	0.530158	0.00775017	N	Y	0	0	0	0
tI(AAU)G	10.9112	12.6149	11.7631	3.93805	4.13807	4.03806	4.86336	2.68121	3.77229	0.464347	0.0666128	0.493916	0.0218292	N	Y	0	0	0	0
tD(GUC)G2	167.76	167.704	167.732	76.3982	42.5631	59.4806	38.299	41.2906	39.7948	0.45024	0.0986921	0.62479	0.0036959	N	Y	0	0	0	0
snR82	343.703	388.466	366.084	163.823	156.656	160.239	79.0296	89.0162	84.0229	0.358812	0.0630034	0.639183	0.0482996	N	Y	0	0	0	0
LSR1	552.379	373.625	463.002	538.725	516.964	527.844	1035.9	1213.52	1124.71	-0.0569232	0.59983	-0.385456	0.0415812	N	N	6	15	8	29
NME1	16.3668	18.5514	17.4591	19.6902	18.3258	19.008	34.6514	34.8557	34.7536	-0.0369152	0.371649	-0.298978	0.0396319	N	N	1	2	5	8
RPR1	27.9599	24.8588	26.4094	58.2831	47.2923	52.7877	91.188	103.495	97.3414	-0.300775	0.110096	-0.566539	0.00802568	N	N	0	1	0	1
SCR1	842.208	900.483	871.346	2107.64	2095.64	2101.64	2512.53	2768.08	2640.31	-0.382368	0.01144	-0.481464	0.00751569	N	N	3	4	5	12
snR10	81.834	132.457	107.145	43.3185	51.1348	47.2267	53.193	52.5517	52.8724	0.355786	0.247978	0.306745	0.277082	N	N	0	0	1	1
snR11	1058.39	684.174	871.28	410.345	255.378	332.862	116.721	121.191	118.956	0.417894	0.175807	0.864773	0.155392	N	N	1	1	4	6
snR128	837.434	1064.48	950.956	299.292	289.074	294.183	120.368	123.872	122.12	0.509543	0.108374	0.891373	0.08673	N	N	0	2	3	5
snR13	149.347	388.837	269.092	52.7699	62.9578	57.8639	22.493	27.3483	24.9207	0.667493	0.327895	1.03334	0.291495	N	N	3	2	2	7
snR14	8.86534	6.67849	7.77192	13.3894	11.8231	12.6062	13.0703	10.1886	11.6294	-0.210057	0.0801712	-0.175031	0.158076	N	N	0	1	0	1
snR161	42.2809	32.2794	37.2801	9.45132	11.8231	10.6372	9.72672	11.7973	10.762	0.54465	0.103184	0.539584	0.117827	N	N	0	0	1	1
snR17a	6607.41	4831.52	5719.46	2136	1630.4	1883.2	576.004	837.61	706.807	0.482459	0.123459	0.908054	0.111478	N	N	1	2	1	4
snR17b	1222.74	940.183	1081.46	383.566	278.138	330.852	110.945	161.409	136.177	0.514377	0.0870504	0.899906	0.0935079	N	N	0	0	1	1
snR19	449.405	267.882	358.643	188.239	177.346	182.792	280.555	290.643	285.599	0.292705	0.302419	0.0989058	0.57943	N	N	1	4	3	8
snR190	789.698	1038.51	914.102	319.77	296.759	308.264	116.113	110.466	113.289	0.472071	0.126383	0.906806	0.0979066	N	N	1	1	3	5
snR3	147.983	383.271	265.627	85.8495	95.7669	90.8082	37.3871	50.943	44.165	0.466148	0.376743	0.779194	0.314747	N	N	0	2	2	4
snR30	2382.05	1933.05	2157.55	414.283	395.482	404.882	279.947	307.803	293.875	0.726632	0.0806421	0.865798	0.0763556	N	N	2	5	5	12
snR32	268.006	408.501	338.254	113.416	133.305	123.36	71.1267	55.7692	63.4479	0.438066	0.195217	0.726825	0.156295	N	N	1	0	1	2
snR34	652.626	784.723	718.674	309.531	272.522	291.026	75.0781	70.2477	72.6629	0.3926	0.0787974	0.995219	0.0646628	N	N	1	2	1	4
snR37	6182.56	2482.54	4332.55	1169.6	820.817	995.209	424.328	432.211	428.27	0.638829	0.320138	1.00503	0.281829	N	N	2	4	4	10
snR39B	6.8195	15.2121	11.0158	3.15044	2.06904	2.60974	3.0396	1.60873	2.32416	0.625419	0.290591	0.67575	0.274472	N	N	0	2	2	4
snR40	12.957	39.6999	26.3285	4.72566	6.20711	5.46639	2.12772	3.75369	2.94071	0.682726	0.362223	0.951974	0.33526	N	N	1	2	3	6
snR41	127.525	254.896	191.21	53.5575	51.7259	52.6417	13.0703	9.65235	11.3613	0.560181	0.274203	1.22608	0.215658	N	N	1	2	2	5
snR42	154.121	105.001	129.561	81.9114	59.1154	70.5134	84.8049	85.7987	85.3018	0.264202	0.211476	0.181515	0.324016	N	N	1	2	4	7
snR45	477.365	683.803	580.584	163.823	185.031	174.427	68.0871	63.2765	65.6818	0.522252	0.155218	0.94642	0.125623	N	N	0	2	4	6
snR47	8.86534	17.8093	13.3373	6.30088	2.06904	4.18496	0.91188	4.82618	2.86903	0.503378	0.253633	0.667334	0.268691	N	N	0	1	1	2
snR48	6.8195	6.67849	6.74899	4.72566	5.91154	5.3186	7.29504	4.82618	6.06061	0.103442	0.246222	0.0467228	0.277718	N	N	0	1	1	2
snR49	54.556	57.1382	55.8471	40.1681	21.2815	30.7248	41.0346	16.0873	28.5609	0.259511	0.223539	0.291228	0.105436	N	N	1	2	1	4
snR50	5.4556	5.56541	5.5105	4.72566	1.77346	3.24956	1.82376	4.28994	3.05685	0.229367	0.36793	0.255917	0.203746	N	N	0	0	1	1
snR51	132.298	256.009	194.154	41.7433	46.7011	44.2222	12.4624	16.0873	14.2748	0.642505	0.248639	1.13358	0.211777	N	N	2	1	2	5
snR56	14.3209	10.7598	12.5404	11.0265	11.2319	11.1292	21.2772	26.2759	23.7765	0.0518452	0.573166	-0.277838	0.0370314	N	N	0	0	1	1
snR58	2.7278	4.45233	3.59006	3.93805	1.47788	2.70797	1.82376	3.21745	2.52061	0.122459	0.62249	0.153597	0.552984	N	N	0	1	1	2
snR6	0.68195	2.59719	1.63957	0.78761	5.0248	2.90621	3.95148	6.97114	5.46131	-0.248596	0.660245	-0.522567	0.0696813	N	N	0	1	1	2
snR61	2.7278	1.85514	2.29147	0.78761	1.18231	0.984958	1.82376	2.68121	2.25248	0.366696	0.163285	0.00745183	0.763669	N	N	0	2	1	3
snR62	10.2292	4.82336	7.5263	6.30088	2.06904	4.18496	3.95148	3.75369	3.85259	0.25489	0.438043	0.290829	0.399706	N	N	1	1	1	3
snR63	879.033	525.004	702.018	274.088	251.24	262.664	79.6375	104.031	91.8342	0.426948	0.242626	0.883344	0.1811	N	N	2	2	3	7
snR66	12.957	18.5514	15.7542	16.5398	18.0302	17.285	29.1802	35.9282	32.5542	-0.0402728	0.681292	-0.31521	0.0455764	N	N	0	2	1	3
snR67	5.4556	2.22616	3.84088	3.93805	1.47788	2.70797	3.34356	2.14497	2.74426	0.151787	0.636345	0.146005	0.543913	N	N	0	1	1	2
snR68	42.9628	79.0288	60.9958	16.5398	18.9169	17.7284	6.99108	5.36242	6.17675	0.536632	0.250159	0.99454	0.20077	N	N	0	0	1	1
snR7-L	36.8253	37.4738	37.1495	54.3451	52.6127	53.4789	52.5851	57.3779	54.9815	-0.158229	0.0176513	-0.170263	0.0288386	N	N	1	1	2	4
snR71	1.3639	0.742055	1.05298	1.57522	0.295577	0.935398	1.5198	2.68121	2.1005	0.0514223	0.8888	-0.299905	0.0884951	N	N	0	1	1	2
snR72	5.4556	7.42055	6.43807	1.57522	2.06904	1.82213	0.91188	1.07248	0.992182	0.548177	0.116507	0.812164	0.113962	N	N	0	0	2	2
snR73	3.40975	8.90466	6.1572	3.15044	2.06904	2.60974	1.5198	1.07248	1.29614	0.372786	0.41381	0.676731	0.320935	N	N	0	1	2	3
snR74	6.13755	10.3888	8.26316	1.57522	1.77346	1.67434	1.5198	1.60873	1.56426	0.693302	0.198002	0.722836	0.196184	N	N	0	1	1	2
snR75	6.13755	10.3888	8.26316	5.51327	1.77346	3.64337	1.21584	1.60873	1.41228	0.355643	0.246292	0.767224	0.193488	N	N	0	0	1	1
snR76	6.13755	8.1626	7.15007	1.57522	1.77346	1.67434	1.21584	1.07248	1.14416	0.630467	0.113616	0.795823	0.105347	N	N	1	1	1	3
snR77	6.13755	11.1308	8.63418	4.72566	2.06904	3.39735	0.60792	2.14497	1.37644	0.405081	0.243079	0.797463	0.215013	N	N	0	1	2	3
snR78	4.0917	3.71027	3.90099	2.36283	0.88673	1.62478	1.21584	2.68121	1.94852	0.38038	0.181587	0.301468	0.0946713	N	N	0	1	0	1
snR8	148.665	289.401	219.033	66.1592	92.5155	79.3374	51.0653	38.0732	44.5692	0.441032	0.288657	0.691475	0.239401	N	N	1	0	1	2
snR83	225.043	171.786	198.415	90.5751	78.6234	84.5993	87.5405	97.596	92.5683	0.370207	0.132217	0.331111	0.157838	N	N	0	1	1	2
snR84	43.6448	31.1663	37.4055	22.0531	19.5081	20.7806	40.4267	42.3631	41.3949	0.255278	0.217165	-0.0440109	0.603747	N	N	1	4	1	6
snR85	71.6047	119.842	95.7233	37.0177	40.1984	38.6081	22.1891	20.9134	21.5513	0.39434	0.253141	0.647545	0.199289	N	N	0	1	1	2
snR86	479.411	380.674	430.042	224.469	167.592	196.03	208.213	250.425	229.319	0.341188	0.0785214	0.273072	0.148684	N	N	0	5	4	9
snR87	0.68195	7.04952	3.86573	1.57522	2.95577	2.26549	2.12772	3.21745	2.67259	0.232069	0.703605	0.1603	0.820872	N	N	0	0	1	1
snR9	540.104	697.902	619.003	236.283	208.677	222.48	58.9683	54.6967	56.8325	0.444402	0.116366	1.0371	0.088552	N	N	2	2	3	7
tG(CCC)D	2.7278	1.85514	2.29147	3.93805	1.18231	2.56018	2.12772	4.82618	3.47695	-0.0481565	0.878952	-0.181085	0.167478	N	N	1	1	0	2
tG(CCC)O	42.2809	31.9084	37.0946	14.177	14.7788	14.4779	28.2683	34.3195	31.2939	0.408605	0.142471	0.0738514	0.556714	N	N	1	1	0	2
tI(UAU)D	83.8798	66.7849	75.3324	25.2035	29.2621	27.2328	51.9772	54.1604	53.0688	0.441889	0.0972152	0.152142	0.237515	N	N	1	1	0	2
tI(UAU)L	2.7278	2.22616	2.47698	2.36283	0.88673	1.62478	5.16732	5.89866	5.53299	0.183128	0.443726	-0.349037	0.0121918	N	N	0	1	0	1
tK(UUU)G2	0.68195	0.742055	0.712002	0.78761	0.591154	0.689382	0.60792	1.07248	0.840202	0.0140215	0.857493	-0.0719024	0.266911	N	N	1	0	0	1
tL(UAG)L1	64.1033	33.3925	48.7479	18.9026	15.37	17.1363	37.0831	35.9282	36.5057	0.454038	0.284463	0.125595	0.564238	N	N	1	1	1	3
tQ(CUG)M	2.04585	2.22616	2.13601	0.78761	2.06904	1.42832	1.82376	3.21745	2.52061	0.174776	0.466036	-0.0719024	0.266911	N	N	1	1	1	3
tS(CGA)C	1.3639	1.85514	1.60952	0.78761	1.47788	1.13275	0.60792	2.68121	1.64456	0.152563	0.387781	-0.00935515	0.469296	N	N	0	0	1	1
tT(CGU)K	1.3639	0.371027	0.867463	1.57522	0.295577	0.935398	0.91188	1.60873	1.2603	-0.0327455	0.9412	-0.162224	0.447033	N	N	1	1	0	2
YAL002W	12.957	9.64671	11.3019	4.72566	4.13807	4.43187	4.25544	6.4349	5.34517	0.406564	0.14133	0.325189	0.16176	N	N	0	0	1	1
YAL003W	19.7765	38.5868	29.1817	11.8141	12.1186	11.9664	11.5505	18.2322	14.8914	0.387147	0.318257	0.292176	0.402693	N	N	3	2	2	7
YAL005C	62.7394	45.6364	54.1879	33.0796	31.3311	32.2054	47.7217	54.6967	51.2092	0.225974	0.233174	0.024554	0.909138	N	N	1	2	1	4
YAL007C	1.3639	0.742055	1.05298	0.78761	1.18231	0.984958	1.5198	1.60873	1.56426	0.029001	0.873165	-0.171891	0.334753	N	N	0	0	1	1
YAL009W	2.04585	1.11308	1.57947	2.36283	0.591154	1.47699	0.91188	0.536242	0.724061	0.0291321	0.930348	0.338735	0.280946	N	N	0	1	0	1
YAL012W	16.3668	9.64671	13.0068	7.8761	13.5965	10.7363	19.1495	23.5946	21.3721	0.0833136	0.659237	-0.215678	0.190286	N	N	0	2	0	2
YAL023C	7.50145	7.42055	7.461	7.08849	4.72923	5.90886	7.599	9.65235	8.62568	0.101293	0.413523	-0.0629964	0.187098	N	N	0	0	2	2
YAL026C	10.9112	14.8411	12.8761	7.08849	7.38942	7.23895	10.0307	8.57987	9.30528	0.25011	0.211763	0.141057	0.286699	N	N	0	1	1	2
YAL031C	5.4556	2.96822	4.21191	0.78761	2.66019	1.7239	1.5198	2.68121	2.1005	0.387967	0.260312	0.302155	0.372251	N	N	0	0	1	1
YAL034C	4.77365	4.45233	4.61299	1.57522	2.36461	1.96992	1.21584	5.36242	3.28913	0.369534	0.061631	0.146901	0.828254	N	N	0	0	1	1
YAL038W	164.35	76.4316	120.391	107.115	98.1315	102.623	138.91	210.207	174.558	0.0693475	0.755537	-0.161347	0.32517	N	N	2	4	1	7
YAL044C	3.40975	4.0813	3.74552	3.15044	3.8425	3.49647	6.68712	4.28994	5.48853	0.029883	0.656962	-0.165943	0.270183	N	N	1	0	0	1
YAL047C	1.3639	1.85514	1.60952	0.78761	0.295577	0.541593	1.5198	1.07248	1.29614	0.473023	0.0916359	0.0940432	0.304743	N	N	0	1	0	1
YAL048C	4.77365	3.33925	4.05645	2.36283	2.06904	2.21593	3.0396	4.82618	3.93289	0.262589	0.225207	0.0134341	0.745145	N	N	0	1	0	1
YAL061W	6.8195	2.96822	4.89386	3.15044	0.591154	1.8708	2.12772	1.60873	1.86822	0.417625	0.337314	0.418223	0.347836	N	N	0	0	1	1
YBL001C	2.04585	0.742055	1.39395	0.78761	1.18231	0.984958	3.64752	6.4349	5.04121	0.15083	0.642766	-0.558287	0.045392	N	N	0	1	0	1
YBL002W	4.0917	0.371027	2.23136	1.57522	2.06904	1.82213	2.43168	3.21745	2.82457	0.0879911	0.862373	-0.102382	0.744503	N	N	0	1	1	2
YBL003C	0.68195	0.742055	0.712002	0.78761	1.47788	1.13275	0.60792	1.60873	1.10832	-0.201652	0.436232	-0.192185	0.230937	N	N	0	1	0	1
YBL004W	50.4643	31.5373	41.0008	12.6018	12.4142	12.508	18.2376	13.406	15.8218	0.515605	0.204116	0.413536	0.214467	N	N	0	1	3	4
YBL007C	41.5989	31.5373	36.5681	9.45132	10.6408	10.046	10.3346	11.2611	10.7979	0.561108	0.115285	0.529765	0.123186	N	N	1	1	0	2
YBL020W	4.0917	1.48411	2.7879	1.57522	1.47788	1.52655	1.21584	3.75369	2.48477	0.261566	0.510396	0.0499921	0.847298	N	N	0	1	0	1
YBL024W	2.7278	1.11308	1.92044	1.57522	2.95577	2.26549	5.16732	5.36242	5.26487	-0.0717621	0.776788	-0.437987	0.147586	N	N	1	0	0	1
YBL027W	8.1834	4.0813	6.13235	7.8761	5.0248	6.45045	15.198	17.1597	16.1789	-0.0219634	0.911545	-0.421321	0.107101	N	N	1	1	0	2
YBL030C	8.86534	5.56541	7.21538	2.36283	0.88673	1.62478	3.34356	3.75369	3.54863	0.647464	0.14047	0.308199	0.274963	N	N	0	1	0	1
YBL039W-B	0.68195	0.371027	0.526488	0.78761	0.591154	0.689382	0.30396	1.07248	0.688222	-0.117071	0.483583	-0.11634	0.29357	N	N	0	1	0	1
YBL042C	19.7765	17.0673	18.4219	10.2389	4.43365	7.33629	18.2376	18.7685	18.503	0.399858	0.118389	-0.00190858	0.900419	N	N	0	0	1	1
YBL045C	6.13755	1.11308	3.62531	0.78761	2.06904	1.42832	4.25544	4.28994	4.27269	0.404519	0.538917	-0.0713555	0.837396	N	N	0	0	2	2
YBL049W	2.04585	0.371027	1.20844	1.57522	1.47788	1.52655	2.73564	3.75369	3.24467	-0.101487	0.768906	-0.428946	0.200058	N	N	0	1	0	1
YBL051C	7.50145	4.82336	6.1624	2.36283	2.95577	2.6593	6.68712	5.89866	6.29289	0.364983	0.219278	-0.00910028	0.968433	N	N	0	1	0	1
YBL052C	2.04585	1.11308	1.57947	3.15044	0.295577	1.72301	3.0396	3.21745	3.12853	-0.0377772	0.937175	-0.29683	0.178484	N	N	0	0	1	1
YBL056W	2.7278	5.56541	4.1466	3.15044	2.06904	2.60974	4.5594	9.11611	6.83776	0.201096	0.464473	-0.217221	0.175837	N	N	0	1	0	1
YBL058W	2.7278	5.56541	4.1466	5.51327	2.36461	3.93894	2.73564	3.75369	3.24467	0.022313	0.930964	0.106522	0.727622	N	N	1	0	0	1
YBL060W	2.7278	0.371027	1.54941	2.36283	0.295577	1.3292	1.21584	1.07248	1.14416	0.0665758	0.901341	0.13168	0.771988	N	N	0	0	1	1
YBL067C	10.2292	10.3888	10.309	6.30088	6.50269	6.40178	5.47128	5.89866	5.68497	0.206916	0.00143334	0.258489	0.00134165	N	N	0	1	2	3
YBL072C	6.13755	4.45233	5.29494	3.93805	2.95577	3.44691	7.29504	5.36242	6.32873	0.186431	0.22842	-0.0774557	0.640265	N	N	1	0	0	1
YBL076C	43.6448	58.2513	50.948	25.2035	25.124	25.1638	37.691	35.392	36.5415	0.306352	0.175707	0.144341	0.28715	N	N	0	1	3	4
YBL079W	29.3238	21.5196	25.4217	10.2389	8.57173	9.40533	12.1584	6.4349	9.29665	0.431831	0.139191	0.436878	0.107492	N	N	1	0	1	2
YBL086C	0.68195	1.11308	0.897516	0.78761	0.295577	0.541593	0.30396	0.536242	0.420101	0.219369	0.391861	0.329688	0.286537	N	N	0	1	0	1
YBL087C	6.8195	2.96822	4.89386	3.93805	2.95577	3.44691	8.20692	7.50739	7.85715	0.152222	0.587663	-0.205614	0.383204	N	N	0	1	0	1
YBL099W	14.3209	6.67849	10.4997	7.08849	3.8425	5.46549	10.0307	13.9423	11.9865	0.283548	0.395995	-0.0575143	0.63441	N	N	0	4	1	5
YBL102W	2.04585	1.85514	1.95049	2.36283	0.88673	1.62478	1.5198	3.21745	2.36863	0.0793498	0.735482	-0.0843521	0.285372	N	N	0	0	1	1
YBL104C	5.4556	2.96822	4.21191	2.36283	2.36461	2.36372	3.0396	4.82618	3.93289	0.250882	0.377084	0.0297672	0.916316	N	N	0	1	0	1
YBL107C	0.68195	0.371027	0.526488	0.78761	0.591154	0.689382	0.91188	1.07248	0.992182	-0.117071	0.483583	-0.275202	0.17168	N	N	0	1	0	1
YBR006W	7.50145	4.82336	6.1624	0.78761	2.66019	1.7239	1.82376	5.36242	3.59309	0.553238	0.127116	0.234282	0.418095	N	N	0	0	1	1
YBR007C	2.7278	2.96822	2.84801	0.78761	1.47788	1.13275	1.5198	2.14497	1.83238	0.400408	0.0976083	0.191525	0.0546766	N	N	0	1	0	1
YBR008C	3.40975	3.33925	3.3745	2.36283	1.77346	2.06815	2.12772	3.21745	2.67259	0.212628	0.136962	0.101277	0.356461	N	N	0	1	0	1
YBR009C	3.40975	3.33925	3.3745	0.78761	2.06904	1.42832	1.5198	3.75369	2.63675	0.373382	0.201548	0.107141	0.802294	N	N	0	1	0	1
YBR010W	2.04585	2.96822	2.50703	1.57522	2.36461	1.96992	5.16732	4.82618	4.99675	0.104712	0.471498	-0.299527	0.111098	N	N	0	1	0	1
YBR021W	5.4556	1.85514	3.65537	3.15044	2.06904	2.60974	4.5594	3.21745	3.88843	0.146334	0.665029	-0.0268429	0.963974	N	N	0	0	1	1
YBR026C	6.13755	3.71027	4.92391	0.78761	2.06904	1.42832	2.73564	3.75369	3.24467	0.537483	0.163993	0.18114	0.443742	N	N	0	1	0	1
YBR031W	25.9141	12.2439	19.079	24.4159	18.0302	21.223	28.2683	38.6094	33.4389	-0.0462522	0.812197	-0.243696	0.213063	N	N	0	1	2	3
YBR036C	5.4556	2.22616	3.84088	3.15044	2.06904	2.60974	4.5594	4.28994	4.42467	0.167834	0.582784	-0.0614499	0.802958	N	N	0	1	0	1
YBR038W	4.77365	2.96822	3.87093	2.36283	1.18231	1.77257	1.21584	2.14497	1.6804	0.339213	0.211155	0.362402	0.259271	N	N	0	1	0	1
YBR048W	6.13755	4.45233	5.29494	9.45132	3.54692	6.49912	7.90296	13.406	10.6545	-0.0889937	0.754649	-0.303672	0.0722659	N	N	1	1	0	2
YBR054W	10.9112	8.1626	9.5369	7.08849	8.27615	7.68232	14.2861	23.5946	18.9404	0.0939148	0.387566	-0.297982	0.070525	N	N	1	1	1	3
YBR057C	2.04585	1.11308	1.57947	2.36283	0.88673	1.62478	1.82376	1.07248	1.44812	-0.0122844	0.964075	0.037705	0.617914	N	N	0	0	1	1
YBR060C	2.7278	1.11308	1.92044	0.78761	1.18231	0.984958	1.21584	1.60873	1.41228	0.289983	0.446465	0.133479	0.70084	N	N	0	1	0	1
YBR067C	10.9112	8.1626	9.5369	11.0265	9.75403	10.3903	17.6297	23.5946	20.6122	-0.0372204	0.649519	-0.334716	0.0254715	N	N	1	1	0	2
YBR068C	57.2838	51.9438	54.6138	31.5044	39.6073	35.5558	51.6732	65.9578	58.8155	0.186391	0.0743393	-0.0321893	0.233314	N	N	0	1	1	2
YBR078W	15.6848	9.27568	12.4803	7.08849	9.45846	8.27347	25.8366	21.9859	23.9113	0.178536	0.39925	-0.282379	0.165662	N	N	1	6	4	11
YBR081C	4.77365	9.64671	7.21018	2.36283	3.54692	2.95488	3.34356	4.82618	4.08487	0.387407	0.319019	0.246768	0.458173	N	N	0	1	0	1
YBR083W	3.40975	2.96822	3.18898	1.57522	1.47788	1.52655	2.12772	3.21745	2.67259	0.319941	0.0723729	0.0767206	0.561237	N	N	1	0	0	1
YBR085C-A	6.13755	3.71027	4.92391	6.30088	3.25134	4.77611	8.81484	11.2611	10.038	0.0132356	0.946755	-0.309335	0.0854997	N	N	0	1	0	1
YBR086C	9.54729	4.45233	6.99981	1.57522	2.95577	2.26549	7.599	9.11611	8.35756	0.489923	0.298957	-0.076993	0.618341	N	N	2	5	0	7
YBR093C	4.77365	1.48411	3.12888	3.15044	1.18231	2.16637	2.12772	2.68121	2.40446	0.159655	0.674887	0.11437	0.782162	N	N	0	0	1	1
YBR097W	6.13755	1.85514	3.99634	1.57522	2.06904	1.82213	3.64752	3.21745	3.43249	0.341084	0.493752	0.0660538	0.806596	N	N	1	1	0	2
YBR102C	6.13755	2.96822	4.55288	2.36283	2.06904	2.21593	1.5198	5.89866	3.70923	0.31273	0.377686	0.0890026	0.909517	N	N	0	1	0	1
YBR115C	0.68195	0.371027	0.526488	0.78761	0.295577	0.541593	0.30396	0.536242	0.420101	-0.0122844	0.964075	0.0980352	0.811182	N	N	0	2	0	2
YBR119W	1.3639	0.742055	1.05298	1.57522	0.591154	1.08319	2.12772	1.60873	1.86822	-0.0122844	0.964075	-0.24901	0.238068	N	N	1	1	0	2
YBR122C	2.7278	1.11308	1.92044	1.57522	1.47788	1.52655	1.21584	4.28994	2.75289	0.0996892	0.711027	-0.156388	0.28772	N	N	0	0	1	1
YBR127C	28.6419	23.0037	25.8228	10.2389	16.5523	13.3956	21.8851	23.5946	22.7399	0.285041	0.100526	0.0552149	0.517081	N	N	0	1	0	1
YBR132C	4.77365	2.96822	3.87093	3.15044	2.36461	2.75753	3.34356	5.36242	4.35299	0.147296	0.418503	-0.050972	0.463396	N	N	1	1	0	2
YBR140C	94.109	74.2055	84.1573	16.5398	27.1931	21.8664	24.6208	28.9571	26.7889	0.585314	0.0546008	0.497136	0.108014	N	N	0	1	3	4
YBR142W	7.50145	1.85514	4.67829	3.15044	2.66019	2.90532	3.95148	3.75369	3.85259	0.206894	0.642824	0.0843348	0.808637	N	N	0	1	0	1
YBR149W	9.54729	6.67849	8.11289	8.66371	7.09384	7.87878	10.9426	15.551	13.2468	0.012717	0.902521	-0.212935	0.0809903	N	N	1	1	0	2
YBR154C	0.68195	2.22616	1.45406	3.15044	0.88673	2.01859	3.34356	3.75369	3.54863	-0.142466	0.724896	-0.387479	0.20998	N	N	0	0	1	1
YBR155W	0.68195	2.96822	1.82508	1.57522	0.295577	0.935398	0.91188	1.60873	1.2603	0.290286	0.583161	0.160808	0.790677	N	N	0	1	0	1
YBR158W	6.8195	5.56541	6.19245	3.93805	2.66019	3.29912	4.25544	2.14497	3.2002	0.273465	0.0839042	0.286685	0.0527736	N	N	1	0	1	2
YBR165W	2.04585	0.742055	1.39395	1.57522	0.591154	1.08319	0.60792	2.68121	1.64456	0.109544	0.742596	-0.0718032	0.457552	N	N	0	1	0	1
YBR177C	2.7278	0.742055	1.73493	1.57522	0.591154	1.08319	3.95148	2.14497	3.04822	0.204578	0.634192	-0.244766	0.541366	N	N	0	1	0	1
YBR179C	2.7278	2.59719	2.66249	3.15044	0.88673	2.01859	1.82376	2.68121	2.25248	0.120242	0.670667	0.0726269	0.523955	N	N	0	0	1	1
YBR181C	10.2292	8.53363	9.38144	12.6018	6.79827	9.70001	17.0218	16.0873	16.5545	-0.0145029	0.931196	-0.246647	0.0608145	N	N	1	1	0	2
YBR189W	4.0917	5.56541	4.82855	7.08849	6.79827	6.94338	18.8455	12.3336	15.5895	-0.157754	0.202534	-0.509016	0.0722452	N	N	1	1	0	2
YBR192W	1.3639	2.59719	1.98055	0.78761	0.88673	0.83717	0.91188	1.07248	0.992182	0.373971	0.313309	0.300193	0.36621	N	N	1	0	0	1
YBR196C	34.7794	32.2794	33.5294	24.4159	26.8975	25.6567	61.7039	50.4067	56.0553	0.116225	0.046586	-0.223191	0.0547975	N	N	1	5	3	9
YBR198C	4.0917	7.04952	5.57061	5.51327	4.72923	5.12125	2.43168	7.50739	4.96953	0.0365268	0.813386	0.049587	0.765143	N	N	0	0	1	1
YBR201W	0.68195	0.371027	0.526488	0.78761	1.18231	0.984958	0.91188	1.60873	1.2603	-0.272029	0.216433	-0.379086	0.0614572	N	N	0	1	0	1
YBR202W	2.7278	5.19438	3.96109	4.72566	3.25134	3.9885	3.64752	5.89866	4.77309	-0.00299502	0.986845	-0.0809849	0.453853	N	N	0	1	0	1
YBR203W	6.8195	5.56541	6.19245	3.93805	2.66019	3.29912	4.86336	8.57987	6.72162	0.273465	0.0839042	-0.0356109	0.338046	N	N	0	0	1	1
YBR205W	3.40975	1.48411	2.44693	1.57522	3.54692	2.56107	0.91188	2.68121	1.79654	-0.0198002	0.941534	0.134183	0.86892	N	N	1	0	0	1
YBR207W	6.13755	2.59719	4.36737	0.78761	0.88673	0.83717	3.95148	3.75369	3.85259	0.717406	0.295696	0.0544674	0.803572	N	N	1	0	1	2
YBR211C	0.68195	0.742055	0.712002	0.78761	0.591154	0.689382	0.91188	0.536242	0.724061	0.0140215	0.857493	-0.00729386	0.539081	N	N	0	1	0	1
YBR212W	6.13755	8.1626	7.15007	3.15044	1.77346	2.46195	6.0792	7.50739	6.79329	0.463031	0.07538	0.0222301	0.999836	N	N	0	0	1	1
YBR214W	17.7307	9.27568	13.5032	5.51327	6.50269	6.00798	3.34356	7.50739	5.42547	0.351708	0.323785	0.395999	0.332675	N	N	0	1	2	3
YBR216C	4.0917	4.45233	4.27201	3.15044	1.77346	2.46195	3.0396	4.82618	3.93289	0.239353	0.213662	0.0359209	0.852962	N	N	0	0	1	1
YBR220C	3.40975	4.0813	3.74552	0.78761	2.95577	1.87169	2.73564	1.07248	1.90406	0.301279	0.316212	0.293832	0.0557776	N	N	0	0	1	1
YBR221C	10.2292	7.42055	8.8249	8.66371	6.79827	7.73099	10.0307	12.3336	11.1821	0.0574746	0.591538	-0.102815	0.253251	N	N	1	0	1	2
YBR238C	19.0946	20.0355	19.565	14.9646	8.8673	11.9159	18.8455	21.4497	20.1476	0.215352	0.234825	-0.0127427	0.276025	N	N	0	0	1	1
YBR241C	4.77365	1.85514	3.31439	1.57522	2.06904	1.82213	2.12772	1.60873	1.86822	0.259825	0.490042	0.248975	0.474596	N	N	0	1	0	1
YBR255C-A	0.68195	0.742055	0.712002	0.78761	0.295577	0.541593	0.30396	0.536242	0.420101	0.118808	0.613827	0.229128	0.105068	N	N	1	0	0	1
YBR262C	1.3639	0.742055	1.05298	1.57522	0.88673	1.23098	1.5198	1.07248	1.29614	-0.0678304	0.738471	-0.0902337	0.748043	N	N	0	0	1	1
YBR269C	0.68195	2.22616	1.45406	0.78761	0.295577	0.541593	2.12772	1.07248	1.6001	0.428908	0.436706	-0.0415663	0.905217	N	N	0	1	0	1
YBR274W	1.3639	2.22616	1.79503	1.57522	0.88673	1.23098	1.5198	2.68121	2.1005	0.163823	0.418592	-0.0682516	0.384253	N	N	0	0	1	1
YBR286W	33.4155	17.4383	25.4269	16.5398	12.7098	14.6248	28.2683	33.247	30.7576	0.240203	0.396779	-0.0826595	0.560166	N	N	0	3	1	4
YBR287W	7.50145	5.93644	6.71894	5.51327	3.8425	4.67788	7.599	9.11611	8.35756	0.157251	0.217035	-0.0947785	0.192617	N	N	0	1	0	1
YBR291C	0.68195	0.371027	0.526488	0.78761	1.18231	0.984958	1.21584	1.07248	1.14416	-0.272029	0.216433	-0.337099	0.151286	N	N	0	1	0	1
YCL025C	16.3668	9.64671	13.0068	10.2389	8.57173	9.40533	14.894	13.406	14.15	0.140795	0.471991	-0.036589	0.856504	N	N	0	3	0	3
YCL028W	4.77365	1.85514	3.31439	2.36283	2.66019	2.51151	3.64752	5.36242	4.50497	0.120469	0.679671	-0.133288	0.458766	N	N	0	1	0	1
YCL030C	46.3726	42.2971	44.3348	26.7787	28.3754	27.5771	39.8188	53.6242	46.7215	0.206197	0.0487033	-0.0227714	0.308904	N	N	0	1	0	1
YCL037C	6.13755	7.04952	6.59353	5.51327	5.32038	5.41683	3.95148	8.57987	6.26568	0.0853733	0.223301	0.0221503	0.603224	N	N	0	1	0	1
YCL043C	42.9628	32.2794	37.6211	22.8407	23.6461	23.2434	33.4356	35.9282	34.6819	0.209132	0.224783	0.0353286	0.739609	N	N	0	1	0	1
YCL044C	1.3639	0.742055	1.05298	2.36283	1.47788	1.92036	0.60792	1.07248	0.840202	-0.260963	0.263708	0.0980352	0.811182	N	N	0	0	1	1
YCR005C	27.278	18.1803	22.7292	13.3894	14.4833	13.9363	30.7	28.9571	29.8285	0.212435	0.300376	-0.118048	0.379568	N	N	0	0	2	2
YCR008W	11.5931	7.42055	9.50685	7.08849	4.13807	5.61328	6.38316	5.36242	5.87279	0.22882	0.280101	0.209192	0.309872	N	N	1	0	0	1
YCR011C	10.2292	15.2121	12.7207	7.08849	7.38942	7.23895	10.3346	13.406	11.8703	0.244835	0.270579	0.0300471	0.979221	N	N	0	1	0	1
YCR012W	93.4271	54.912	74.1696	72.4601	81.5792	77.0196	178.425	190.902	184.663	-0.0163758	0.907095	-0.396155	0.0996872	N	N	3	2	0	5
YCR015C	2.04585	1.11308	1.57947	1.57522	0.88673	1.23098	0.91188	1.60873	1.2603	0.108261	0.613365	0.0980352	0.811182	N	N	0	1	1	2
YCR017C	7.50145	12.2439	9.87267	6.30088	4.43365	5.36727	7.29504	10.1886	8.74182	0.264682	0.281233	0.052833	0.892967	N	N	0	1	1	2
YCR024C-A	4.77365	2.22616	3.49991	3.93805	4.72923	4.33364	8.51088	7.50739	8.00913	-0.0927964	0.630193	-0.359529	0.173865	N	N	0	0	1	1
YCR024C-B	4.0917	2.96822	3.52996	7.8761	3.8425	5.8593	13.6782	13.406	13.5421	-0.220076	0.446044	-0.583917	0.0334642	N	N	1	2	1	4
YCR027C	0.68195	0.742055	0.712002	1.57522	0.295577	0.935398	1.21584	0.536242	0.876041	-0.118515	0.786166	-0.0900431	0.978134	N	N	0	1	0	1
YCR031C	3.40975	1.85514	2.63244	3.15044	2.06904	2.60974	3.0396	5.36242	4.20101	0.00376189	0.983277	-0.202995	0.16725	N	N	1	0	0	1
YCR032W	30.0058	21.1486	25.5772	7.8761	7.98057	7.92834	10.3346	10.1886	10.2616	0.50867	0.156472	0.396637	0.178771	N	N	0	1	1	2
YCR051W	1.3639	2.59719	1.98055	0.78761	1.77346	1.28054	1.5198	1.07248	1.29614	0.189393	0.47266	0.184132	0.414573	N	N	0	0	1	1
YCR053W	7.50145	8.90466	8.20305	4.72566	9.16288	6.94427	17.6297	20.9134	19.2716	0.0723489	0.671807	-0.370941	0.00886064	N	N	1	2	3	6
YCR054C	1.3639	0.371027	0.867463	1.57522	0.88673	1.23098	2.73564	3.21745	2.97655	-0.151998	0.614947	-0.535461	0.123375	N	N	0	1	0	1
YCR066W	2.04585	0.742055	1.39395	1.57522	1.18231	1.37876	0.60792	1.07248	0.840202	0.00475799	0.985365	0.219864	0.622806	N	N	0	0	1	1
YCR067C	6.13755	5.93644	6.03699	5.51327	3.8425	4.67788	5.47128	11.7973	8.6343	0.110771	0.347791	-0.155407	0.229138	N	N	0	0	1	1
YCR069W	13.639	16.3252	14.9821	11.0265	11.2319	11.1292	13.3742	19.841	16.6076	0.129108	0.211785	-0.0447341	0.266913	N	N	0	2	0	2
YCR093W	51.8282	37.1027	44.4655	17.3274	18.3258	17.8266	20.9732	19.841	20.4071	0.396954	0.170251	0.338241	0.186536	N	N	0	3	1	4
YDL003W	2.04585	0.371027	1.20844	1.57522	0.591154	1.08319	0.91188	1.07248	0.992182	0.0475211	0.911589	0.0856331	0.86807	N	N	0	0	1	1
YDL014W	14.3209	8.1626	11.2418	5.51327	5.91154	5.7124	4.5594	5.89866	5.22903	0.294016	0.322477	0.332414	0.313525	N	N	1	1	1	3
YDL016C	0.68195	0.371027	0.526488	0.78761	0.295577	0.541593	0.60792	1.07248	0.840202	-0.0122844	0.964075	-0.202995	0.16725	N	N	0	1	0	1
YDL019C	10.2292	12.6149	11.4221	5.51327	5.91154	5.7124	4.86336	3.75369	4.30853	0.300927	0.123095	0.423417	0.0880636	N	N	1	0	0	1
YDL020C	16.3668	12.6149	14.4909	6.30088	7.09384	6.69736	9.42276	13.406	11.4144	0.33519	0.137694	0.103641	0.456987	N	N	0	0	1	1
YDL021W	3.40975	1.48411	2.44693	3.15044	2.66019	2.90532	1.82376	2.14497	1.98436	-0.0745719	0.717628	0.091	0.759442	N	N	1	0	0	1
YDL025C	2.7278	2.96822	2.84801	2.36283	2.36461	2.36372	2.73564	2.14497	2.4403	0.0809449	0.154875	0.0670974	0.104992	N	N	0	0	1	1
YDL027C	1.3639	1.48411	1.424	1.57522	1.18231	1.37876	1.21584	1.60873	1.41228	0.0140215	0.857493	0.00358959	0.544567	N	N	0	0	2	2
YDL040C	10.2292	6.30747	8.26835	3.93805	8.8673	6.40268	9.1188	11.2611	10.1899	0.111058	0.616294	-0.0907526	0.419434	N	N	0	0	1	1
YDL048C	14.3209	6.67849	10.4997	3.15044	6.50269	4.82656	9.72672	15.551	12.6389	0.33754	0.355162	-0.0805306	0.512913	N	N	0	0	2	2
YDL053C	1.3639	1.11308	1.23849	0.78761	1.18231	0.984958	1.5198	2.68121	2.1005	0.0994748	0.408458	-0.229431	0.116649	N	N	0	1	0	1
YDL055C	13.639	7.04952	10.3443	10.2389	5.61596	7.92744	11.2465	17.1597	14.2031	0.115566	0.615246	-0.137685	0.326166	N	N	1	3	2	6
YDL060W	13.639	5.93644	9.78772	5.51327	2.06904	3.79115	7.29504	3.75369	5.52437	0.41191	0.339093	0.248399	0.400969	N	N	0	0	1	1
YDL061C	2.7278	1.85514	2.29147	2.36283	4.72923	3.54603	4.5594	6.4349	5.49715	-0.189629	0.472049	-0.380024	0.0294067	N	N	2	3	0	5
YDL063C	5.4556	2.59719	4.02639	3.15044	2.06904	2.60974	2.12772	2.14497	2.13634	0.188319	0.495065	0.275245	0.412871	N	N	0	1	0	1
YDL066W	10.2292	5.56541	7.89733	4.72566	6.79827	5.76196	10.0307	20.9134	15.4721	0.13691	0.522672	-0.292068	0.105545	N	N	0	1	1	2
YDL067C	0.68195	0.742055	0.712002	0.78761	0.591154	0.689382	0.91188	1.60873	1.2603	0.0140215	0.857493	-0.247994	0.141925	N	N	0	1	0	1
YDL070W	14.3209	9.27568	11.7983	7.08849	3.8425	5.46549	7.599	7.50739	7.55319	0.334191	0.190626	0.193689	0.339818	N	N	1	1	1	3
YDL072C	5.4556	3.33925	4.39742	3.15044	7.09384	5.12214	5.16732	5.36242	5.26487	-0.0662534	0.784744	-0.0781895	0.545533	N	N	1	0	1	2
YDL074C	5.4556	2.22616	3.84088	2.36283	3.25134	2.80709	3.34356	4.82618	4.08487	0.136175	0.636637	-0.0267473	0.76914	N	N	1	0	1	2
YDL076C	2.7278	1.48411	2.10595	1.57522	1.18231	1.37876	1.82376	0.536242	1.18	0.183959	0.440346	0.251566	0.256616	N	N	0	1	0	1
YDL078C	4.77365	6.67849	5.72607	3.93805	4.43365	4.18585	5.77524	5.89866	5.83695	0.136073	0.340105	-0.0083294	0.905961	N	N	0	1	1	2
YDL080C	3.40975	2.96822	3.18898	3.15044	1.18231	2.16637	1.82376	2.14497	1.98436	0.167919	0.483029	0.206031	0.0928641	N	N	0	1	0	1
YDL081C	4.77365	4.0813	4.42747	11.8141	5.61596	8.71505	15.502	19.841	17.6715	-0.294114	0.396246	-0.601116	0.0318785	N	N	1	1	0	2
YDL082W	1.3639	4.0813	2.7226	4.72566	4.72923	4.72744	9.42276	11.2611	10.3419	-0.239643	0.379176	-0.579617	0.0799026	N	N	1	1	2	4
YDL083C	6.13755	1.85514	3.99634	5.51327	6.79827	6.15577	11.2465	9.65235	10.4494	-0.18762	0.490637	-0.41743	0.206616	N	N	0	1	1	2
YDL088C	3.40975	5.56541	4.48758	2.36283	1.18231	1.77257	1.82376	3.75369	2.78873	0.403409	0.193431	0.206606	0.449507	N	N	0	1	0	1
YDL089W	2.04585	1.85514	1.95049	1.57522	0.295577	0.935398	2.12772	3.21745	2.67259	0.319148	0.353546	-0.136787	0.140108	N	N	0	2	0	2
YDL090C	0.68195	1.11308	0.897516	1.57522	0.88673	1.23098	1.21584	1.07248	1.14416	-0.137207	0.511753	-0.105445	0.504616	N	N	0	1	0	1
YDL093W	4.77365	8.90466	6.83915	6.30088	6.79827	6.54957	9.1188	11.2611	10.1899	0.0187893	0.911462	-0.173169	0.29662	N	N	0	0	1	1
YDL095W	11.5931	5.93644	8.76479	7.08849	5.32038	6.20444	7.599	15.551	11.575	0.150039	0.526566	-0.12078	0.31244	N	N	0	0	1	1
YDL097C	3.40975	4.45233	3.93104	2.36283	1.77346	2.06815	6.38316	7.50739	6.94527	0.278926	0.119625	-0.247182	0.05349	N	N	1	0	0	1
YDL102W	11.5931	5.19438	8.39376	2.36283	1.77346	2.06815	2.73564	2.14497	2.4403	0.608376	0.295956	0.536513	0.306935	N	N	0	0	1	1
YDL103C	2.04585	1.85514	1.95049	1.57522	1.77346	1.67434	0.91188	1.60873	1.2603	0.0663007	0.18264	0.189669	0.156547	N	N	0	1	0	1
YDL113C	2.7278	3.33925	3.03352	0.78761	2.36461	1.57611	2.43168	3.21745	2.82457	0.28436	0.289758	0.0309955	0.976125	N	N	0	1	0	1
YDL117W	2.7278	5.93644	4.33212	3.15044	1.47788	2.31416	3.34356	3.21745	3.28051	0.272307	0.411455	0.120759	0.621933	N	N	0	1	0	1
YDL124W	23.1863	13.728	18.4571	8.66371	7.38942	8.02656	6.0792	11.7973	8.93826	0.361635	0.266175	0.314912	0.319938	N	N	1	0	1	2
YDL125C	0.68195	1.85514	1.26854	0.78761	1.47788	1.13275	2.12772	3.75369	2.94071	0.0491724	0.864032	-0.365146	0.114799	N	N	0	1	0	1
YDL126C	42.9628	36.7317	39.8473	11.8141	21.5771	16.6956	30.7	30.0295	30.3648	0.377796	0.0744	0.118029	0.197923	N	N	1	1	0	2
YDL128W	3.40975	2.22616	2.81796	2.36283	2.36461	2.36372	2.43168	2.68121	2.55644	0.0763378	0.583241	0.0422978	0.793482	N	N	0	1	0	1
YDL130W	6.13755	4.82336	5.48045	2.36283	5.32038	3.84161	9.42276	7.50739	8.46507	0.154304	0.455897	-0.188814	0.101768	N	N	0	1	0	1
YDL132W	4.77365	3.33925	4.05645	3.15044	2.06904	2.60974	2.12772	7.50739	4.81755	0.191549	0.257701	-0.0746808	0.334866	N	N	1	0	0	1
YDL133C-A	0.68195	0.371027	0.526488	1.57522	0.591154	1.08319	0.30396	0.536242	0.420101	-0.313314	0.451441	0.0980352	0.811182	N	N	2	2	2	6
YDL136W	4.77365	2.96822	3.87093	3.93805	5.32038	4.62922	10.6386	9.11611	9.87736	-0.0776917	0.577482	-0.406825	0.0660005	N	N	0	0	1	1
YDL137W	5.4556	4.0813	4.76845	4.72566	2.66019	3.69293	7.90296	5.89866	6.90081	0.111007	0.488803	-0.160523	0.20684	N	N	0	1	0	1
YDL141W	2.04585	3.71027	2.87806	1.57522	2.36461	1.96992	1.5198	4.28994	2.90487	0.164652	0.46153	-0.00402634	0.576739	N	N	0	0	1	1
YDL146W	0.68195	0.371027	0.526488	0.78761	0.591154	0.689382	1.5198	3.75369	2.63675	-0.117071	0.483583	-0.69968	0.111114	N	N	0	1	0	1
YDL148C	4.0917	1.85514	2.97342	2.36283	2.06904	2.21593	3.0396	2.14497	2.59228	0.127699	0.62044	0.0595733	0.684237	N	N	0	0	1	1
YDL156W	3.40975	2.59719	3.00347	0.78761	2.06904	1.42832	0.60792	1.07248	0.840202	0.322797	0.196192	0.55324	0.103822	N	N	1	0	0	1
YDL160C	1.3639	4.0813	2.7226	3.93805	2.95577	3.44691	6.68712	9.11611	7.90162	-0.102446	0.689753	-0.462732	0.104824	N	N	0	0	2	2
YDL171C	119.341	100.177	109.759	38.5929	43.4498	41.0213	39.8188	42.3631	41.0909	0.427431	0.0729615	0.426695	0.0878848	N	N	0	3	0	3
YDL182W	7.50145	8.53363	8.01754	6.30088	6.79827	6.54957	9.42276	10.1886	9.80568	0.0878281	0.17085	-0.0874367	0.129525	N	N	0	1	0	1
YDL184C	0.68195	0.371027	0.526488	0.78761	1.47788	1.13275	0.60792	1.60873	1.10832	-0.332744	0.300494	-0.323277	0.128892	N	N	2	1	1	4
YDL190C	11.5931	7.79157	9.69236	3.15044	3.54692	3.34868	5.77524	8.57987	7.17756	0.461556	0.182029	0.130453	0.508187	N	N	0	0	1	1
YDL191W	8.1834	5.93644	7.05992	4.72566	7.09384	5.90975	14.5901	13.406	13.9981	0.0772304	0.554208	-0.297268	0.089246	N	N	1	1	1	3
YDL195W	26.596	15.5831	21.0896	6.30088	9.45846	7.87967	8.51088	17.696	13.1034	0.42756	0.231513	0.206683	0.480457	N	N	0	3	0	3
YDL204W	2.7278	3.33925	3.03352	1.57522	2.06904	1.82213	3.0396	3.75369	3.39665	0.221368	0.0961114	-0.0491032	0.293548	N	N	0	1	0	1
YDL206W	5.4556	3.71027	4.58294	1.57522	1.47788	1.52655	1.5198	3.21745	2.36863	0.477432	0.176095	0.286647	0.252107	N	N	1	1	0	2
YDL212W	5.4556	1.48411	3.46985	1.57522	1.47788	1.52655	1.82376	4.28994	3.05685	0.3566	0.506816	0.0550373	0.935855	N	N	1	2	1	4
YDL222C	4.0917	0.742055	2.41688	2.36283	0.591154	1.47699	0.30396	1.07248	0.688222	0.213876	0.682123	0.545526	0.526315	N	N	0	0	1	1
YDL225W	1.3639	1.85514	1.60952	2.36283	2.36461	2.36372	0.91188	2.14497	1.52842	-0.166901	0.200426	0.022452	0.625119	N	N	0	1	0	1
YDL229W	33.4155	19.2934	26.3545	15.7522	17.439	16.5956	34.6514	40.7544	37.7029	0.200861	0.396258	-0.155521	0.309178	N	N	1	2	0	3
YDL232W	0.68195	0.371027	0.526488	0.78761	0.295577	0.541593	0.30396	0.536242	0.420101	-0.0122844	0.964075	0.0980352	0.811182	N	N	0	1	0	1
YDL234C	10.9112	9.64671	10.279	7.08849	7.09384	7.09117	9.1188	8.04363	8.58122	0.161231	0.124639	0.0784001	0.15891	N	N	1	1	1	3
YDL236W	2.04585	4.0813	3.06357	1.57522	1.47788	1.52655	1.21584	4.82618	3.02101	0.302517	0.371875	0.00607653	0.592681	N	N	0	1	0	1
YDL239C	4.77365	5.93644	5.35504	0.78761	3.25134	2.01948	2.73564	1.60873	2.17218	0.423524	0.182614	0.391866	0.0633438	N	N	0	0	1	1
YDR002W	4.0917	4.0813	4.0865	3.93805	2.06904	3.00354	6.38316	7.50739	6.94527	0.133718	0.453236	-0.230338	0.0567576	N	N	0	0	1	1
YDR006C	19.7765	13.357	16.5668	11.8141	5.32038	8.56727	8.51088	10.7248	9.61786	0.286395	0.221868	0.236159	0.2889	N	N	0	1	0	1
YDR012W	16.3668	8.53363	12.4502	16.5398	13.5965	15.0682	19.4534	25.7396	22.5965	-0.0828838	0.624617	-0.258865	0.169426	N	N	1	0	2	3
YDR017C	18.4126	7.42055	12.9166	6.30088	5.0248	5.66284	4.86336	5.36242	5.11289	0.358114	0.41057	0.402482	0.395377	N	N	0	0	1	1
YDR019C	5.4556	3.71027	4.58294	4.72566	5.91154	5.3186	3.34356	3.75369	3.54863	-0.0646534	0.566135	0.111083	0.477569	N	N	1	0	0	1
YDR025W	5.4556	4.0813	4.76845	6.30088	5.32038	5.81063	12.4624	13.406	12.9342	-0.0858461	0.353411	-0.433363	0.0330179	N	N	0	1	0	1
YDR032C	6.13755	5.93644	6.03699	7.8761	4.43365	6.15488	7.29504	8.57987	7.93746	-0.00839865	0.956484	-0.118861	0.0694769	N	N	0	1	0	1
YDR033W	19.7765	11.5018	15.6392	8.66371	9.75403	9.20887	31.3079	42.8994	37.1036	0.230008	0.360499	-0.375202	0.0499823	N	N	4	6	3	13
YDR034C	11.5931	5.93644	8.76479	3.15044	3.54692	3.34868	6.68712	3.21745	4.95229	0.417868	0.305153	0.247936	0.329464	N	N	0	2	0	2
YDR035W	8.86534	5.56541	7.21538	7.08849	5.32038	6.20444	13.6782	21.4497	17.5639	0.0655568	0.65722	-0.386363	0.042521	N	N	1	2	0	3
YDR037W	35.4614	25.2299	30.3456	20.4779	23.9417	22.2098	31.9158	37.5369	34.7264	0.135552	0.339055	-0.0585634	0.453157	N	N	1	1	0	2
YDR038C	15.0029	17.8093	16.4061	7.8761	7.38942	7.63276	6.38316	8.57987	7.48152	0.332324	0.0929195	0.341016	0.073274	N	N	1	0	0	1
YDR046C	27.9599	15.9542	21.9571	18.9026	9.45846	14.1805	21.2772	17.1597	19.2185	0.189881	0.42074	0.0578552	0.642595	N	N	0	1	2	3
YDR047W	6.13755	7.42055	6.77905	5.51327	3.54692	4.5301	6.38316	2.68121	4.53219	0.175061	0.215645	0.174861	0.120836	N	N	0	1	0	1
YDR050C	34.7794	22.2616	28.5205	31.5044	20.6904	26.0974	44.6821	42.8994	43.7907	0.0385607	0.79766	-0.186225	0.252896	N	N	2	1	1	4
YDR055W	39.5531	25.6009	32.577	32.292	31.3311	31.8116	69.6069	77.2188	73.4128	0.0103257	0.930464	-0.352861	0.0847274	N	N	0	1	0	1
YDR062W	9.54729	3.71027	6.62878	6.30088	6.79827	6.54957	15.8059	17.696	16.751	0.00522092	0.98274	-0.402606	0.163365	N	N	0	0	1	1
YDR064W	2.04585	3.71027	2.87806	7.08849	5.61596	6.35222	20.6693	23.0584	21.8638	-0.343826	0.0905405	-0.880626	0.00420343	N	N	1	2	2	5
YDR067C	1.3639	0.371027	0.867463	0.78761	0.591154	0.689382	0.91188	1.60873	1.2603	0.0997913	0.781229	-0.162224	0.447033	N	N	0	0	1	1
YDR074W	32.7336	17.4383	25.0859	11.0265	7.98057	9.50356	11.2465	11.2611	11.2538	0.421544	0.28088	0.348131	0.321602	N	N	0	0	1	1
YDR077W	111.84	56.7672	84.3035	58.2831	88.673	73.4781	149.852	207.526	178.689	0.0596876	0.771456	-0.326252	0.107265	N	N	2	3	3	8
YDR081C	4.77365	4.45233	4.61299	3.15044	2.95577	3.0531	3.95148	4.82618	4.38883	0.179241	0.0244906	0.0216337	0.985852	N	N	1	0	1	2
YDR091C	3.40975	3.33925	3.3745	2.36283	3.54692	2.95488	3.64752	4.28994	3.96873	0.0576699	0.607325	-0.0704423	0.120104	N	N	0	1	0	1
YDR093W	25.9141	14.4701	20.1921	7.08849	10.9363	9.01241	7.29504	10.1886	8.74182	0.35034	0.278719	0.363579	0.308134	N	N	0	1	2	3
YDR096W	7.50145	2.59719	5.04932	2.36283	1.18231	1.77257	2.73564	9.65235	6.194	0.45463	0.400479	-0.0887382	0.448832	N	N	1	0	1	2
YDR098C	1.3639	0.371027	0.867463	1.57522	0.591154	1.08319	1.5198	1.07248	1.29614	-0.0964522	0.786783	-0.174401	0.637546	N	N	0	1	0	1
YDR099W	8.1834	5.19438	6.68889	8.66371	5.0248	6.84426	12.4624	13.9423	13.2023	-0.00997231	0.953591	-0.295296	0.119493	N	N	2	1	1	4
YDR108W	2.7278	1.85514	2.29147	1.57522	0.591154	1.08319	3.34356	2.68121	3.01239	0.32541	0.209366	-0.118797	0.409283	N	N	1	1	0	2
YDR109C	7.50145	3.71027	5.60586	2.36283	1.77346	2.06815	1.5198	2.14497	1.83238	0.433061	0.307485	0.485626	0.305613	N	N	1	0	0	1
YDR115W	2.04585	0.371027	1.20844	2.36283	1.77346	2.06815	1.5198	2.68121	2.1005	-0.233357	0.48342	-0.240099	0.376349	N	N	0	0	1	1
YDR121W	0.68195	0.742055	0.712002	0.78761	0.88673	0.83717	1.21584	1.07248	1.14416	-0.0703324	0.189957	-0.206006	0.014918	N	N	0	1	0	1
YDR129C	10.9112	9.27568	10.0934	6.30088	3.54692	4.9239	9.1188	7.50739	8.31309	0.31173	0.109422	0.0842765	0.183853	N	N	2	1	0	3
YDR133C	3.40975	0.371027	1.89039	0.78761	0.295577	0.541593	0.60792	0.536242	0.572081	0.542878	0.535944	0.519093	0.540761	N	N	1	5	1	7
YDR135C	19.7765	27.8271	23.8018	9.45132	10.0496	9.75046	13.3742	18.7685	16.0714	0.387584	0.175914	0.170557	0.340273	N	N	0	0	1	1
YDR141C	15.6848	17.8093	16.7471	10.2389	5.61596	7.92744	8.20692	18.2322	13.2196	0.324806	0.119349	0.102722	0.758045	N	N	1	0	1	2
YDR144C	2.7278	3.33925	3.03352	1.57522	0.591154	1.08319	1.21584	2.14497	1.6804	0.447244	0.0992776	0.256534	0.108417	N	N	0	0	1	1
YDR154C	14.3209	5.56541	9.94318	7.8761	8.8673	8.3717	18.5416	22.5222	20.5319	0.0747114	0.78072	-0.314903	0.216181	N	N	0	2	0	2
YDR155C	28.6419	20.0355	24.3387	15.7522	17.7346	16.7434	32.5237	31.102	31.8129	0.162453	0.317077	-0.116306	0.344642	N	N	1	1	2	4
YDR170C	36.1433	26.3429	31.2431	11.0265	12.1186	11.5726	14.894	19.3047	17.0994	0.431324	0.151661	0.261774	0.215196	N	N	0	2	1	3
YDR171W	28.6419	21.5196	25.0807	7.08849	10.9363	9.01241	10.0307	16.6235	13.3271	0.444499	0.0874971	0.274605	0.173294	N	N	1	2	1	4
YDR173C	2.7278	0.371027	1.54941	0.78761	1.77346	1.28054	0.91188	0.536242	0.724061	0.0827756	0.860749	0.330392	0.577897	N	N	1	0	0	1
YDR184C	0.68195	0.371027	0.526488	1.57522	0.591154	1.08319	0.91188	1.60873	1.2603	-0.313314	0.451441	-0.379086	0.0614572	N	N	0	0	1	1
YDR188W	16.3668	12.2439	14.3053	5.51327	6.20711	5.86019	8.81484	7.50739	8.16111	0.387587	0.144104	0.243749	0.188951	N	N	0	1	1	2
YDR189W	4.0917	2.59719	3.34444	1.57522	2.66019	2.11771	1.5198	3.75369	2.63675	0.198458	0.325866	0.103256	0.888641	N	N	1	0	0	1
YDR192C	1.3639	1.11308	1.23849	0.78761	0.591154	0.689382	1.21584	1.60873	1.41228	0.254433	0.0809298	-0.057029	0.236917	N	N	0	0	1	1
YDR194C	5.4556	5.93644	5.69602	6.30088	2.06904	4.18496	4.5594	6.4349	5.49715	0.13388	0.604692	0.0154336	0.67391	N	N	1	0	0	1
YDR201W	0.68195	0.742055	0.712002	0.78761	0.295577	0.541593	0.30396	1.60873	0.956343	0.118808	0.613827	-0.128132	0.328691	N	N	1	0	0	1
YDR205W	2.04585	3.33925	2.69255	1.57522	1.47788	1.52655	1.82376	2.14497	1.98436	0.246452	0.321033	0.132542	0.507961	N	N	0	1	0	1
YDR216W	7.50145	6.30747	6.90446	3.93805	3.25134	3.5947	3.34356	5.36242	4.35299	0.283467	0.0620426	0.200342	0.123524	N	N	0	0	2	2
YDR224C	3.40975	2.59719	3.00347	5.51327	2.36461	3.93894	6.38316	6.97114	6.67715	-0.117756	0.658283	-0.346968	0.0437691	N	N	0	1	1	2
YDR225W	4.0917	2.96822	3.52996	3.93805	5.0248	4.48143	12.1584	13.406	12.7822	-0.103647	0.347708	-0.558837	0.0113695	N	N	0	1	0	1
YDR226W	12.957	3.71027	8.33366	3.15044	2.95577	3.0531	8.51088	10.1886	9.34974	0.436094	0.457759	-0.0499638	0.808438	N	N	0	1	0	1
YDR227W	8.1834	7.42055	7.80197	4.72566	2.66019	3.69293	4.86336	5.89866	5.38101	0.324834	0.124203	0.16134	0.0540961	N	N	0	0	1	1
YDR231C	2.04585	1.11308	1.57947	1.57522	0.88673	1.23098	1.21584	2.68121	1.94852	0.108261	0.613365	-0.0911958	0.346655	N	N	0	2	0	2
YDR232W	15.0029	18.5514	16.7771	14.9646	7.98057	11.4726	11.8544	11.2611	11.5578	0.165057	0.345467	0.161844	0.201116	N	N	0	0	2	2
YDR233C	14.3209	8.1626	11.2418	7.8761	8.57173	8.22391	17.6297	26.8121	22.2209	0.135756	0.505174	-0.295927	0.0831321	N	N	2	1	1	4
YDR237W	2.04585	1.11308	1.57947	0.78761	2.06904	1.42832	2.73564	5.89866	4.31715	0.0436835	0.867805	-0.436687	0.0849067	N	N	0	1	0	1
YDR247W	3.40975	2.22616	2.81796	1.57522	1.77346	1.67434	1.5198	2.68121	2.1005	0.226091	0.29731	0.127611	0.604096	N	N	0	2	0	2
YDR251W	8.86534	6.67849	7.77192	2.36283	2.66019	2.51151	3.95148	6.97114	5.46131	0.490593	0.125054	0.153231	0.374902	N	N	0	0	1	1
YDR258C	36.8253	22.6327	29.729	7.8761	9.45846	8.66728	12.1584	21.4497	16.804	0.535297	0.203184	0.247766	0.359441	N	N	1	0	0	1
YDR261C	2.04585	2.96822	2.50703	2.36283	2.36461	2.36372	1.82376	1.60873	1.71624	0.0255638	0.808195	0.164581	0.314984	N	N	0	1	0	1
YDR264C	16.3668	18.1803	17.2736	10.2389	9.75403	9.99648	11.8544	17.1597	14.5071	0.237535	0.0630196	0.0758016	0.475152	N	N	1	1	0	2
YDR266C	0.68195	1.85514	1.26854	3.15044	1.47788	2.31416	1.21584	3.21745	2.21665	-0.261088	0.424127	-0.242391	0.204207	N	N	0	0	1	1
YDR270W	4.77365	4.82336	4.7985	2.36283	2.66019	2.51151	3.64752	2.68121	3.16437	0.281171	0.036419	0.180819	0.0788105	N	N	0	0	1	1
YDR277C	5.4556	7.42055	6.43807	1.57522	3.25134	2.41328	2.73564	1.60873	2.17218	0.426148	0.0921636	0.471859	0.114078	N	N	0	1	0	1
YDR280W	2.04585	1.11308	1.57947	0.78761	0.295577	0.541593	1.82376	1.60873	1.71624	0.464837	0.226814	-0.0360687	0.888	N	N	0	1	1	2
YDR284C	2.7278	0.371027	1.54941	1.57522	0.591154	1.08319	3.34356	2.68121	3.01239	0.155464	0.764344	-0.288743	0.467073	N	N	0	1	1	2
YDR291W	7.50145	4.45233	5.97689	3.93805	2.95577	3.44691	3.64752	5.89866	4.77309	0.239045	0.327316	0.0976754	0.749335	N	N	0	0	1	1
YDR292C	6.13755	3.71027	4.92391	0.78761	2.06904	1.42832	3.34356	3.75369	3.54863	0.537483	0.163993	0.14225	0.484058	N	N	1	0	0	1
YDR304C	2.7278	1.48411	2.10595	3.15044	2.66019	2.90532	4.86336	3.75369	4.30853	-0.139744	0.405364	-0.31088	0.157369	N	N	0	1	0	1
YDR306C	0.68195	0.371027	0.526488	1.57522	0.591154	1.08319	1.5198	2.14497	1.83238	-0.313314	0.451441	-0.541628	0.0219843	N	N	0	1	0	1
YDR307W	4.0917	0.742055	2.41688	1.57522	0.88673	1.23098	2.73564	3.21745	2.97655	0.293005	0.606487	-0.0904582	0.754457	N	N	0	1	0	1
YDR309C	2.7278	1.48411	2.10595	2.36283	1.47788	1.92036	2.43168	2.14497	2.28832	0.0400669	0.832656	-0.0360687	0.888	N	N	0	2	0	2
YDR314C	5.4556	3.71027	4.58294	3.15044	2.36461	2.75753	3.0396	2.68121	2.86041	0.220624	0.249273	0.204716	0.282966	N	N	0	1	0	1
YDR321W	2.7278	2.96822	2.84801	2.36283	2.36461	2.36372	2.73564	2.68121	2.70843	0.0809449	0.154875	0.0218245	0.421569	N	N	1	1	0	2
YDR322W	0.68195	0.742055	0.712002	1.57522	1.47788	1.52655	2.12772	2.14497	2.13634	-0.33123	0.00976788	-0.47719	0.0116427	N	N	1	0	0	1
YDR326C	23.1863	13.728	18.4571	7.08849	4.13807	5.61328	7.29504	5.89866	6.59685	0.516948	0.200599	0.446828	0.233669	N	N	0	0	1	1
YDR342C	33.4155	9.64671	21.5311	11.8141	5.61596	8.71505	17.0218	17.1597	17.0908	0.392797	0.46951	0.100305	0.773988	N	N	1	2	2	5
YDR345C	128.888	104.63	116.759	121.292	112.615	116.953	220.675	216.105	218.39	-0.000721894	0.990008	-0.271943	0.0742337	N	N	0	1	1	2
YDR346C	12.2751	7.42055	9.84782	6.30088	4.72923	5.51505	9.1188	8.04363	8.58122	0.25179	0.305553	0.0597913	0.640641	N	N	1	2	0	3
YDR349C	7.50145	6.30747	6.90446	4.72566	3.54692	4.13629	4.86336	6.4349	5.64913	0.222518	0.0808763	0.0871477	0.366873	N	N	0	1	0	1
YDR353W	10.2292	5.56541	7.89733	8.66371	8.57173	8.61772	10.6386	13.9423	12.2904	-0.0379121	0.809256	-0.192087	0.240792	N	N	0	0	1	1
YDR371W	6.13755	2.22616	4.18186	1.57522	1.47788	1.52655	1.82376	1.60873	1.71624	0.437657	0.404029	0.38679	0.420107	N	N	1	1	0	2
YDR372C	2.04585	2.22616	2.13601	1.57522	2.95577	2.26549	5.16732	6.97114	6.06923	-0.0255603	0.882148	-0.453531	0.0565217	N	N	0	1	0	1
YDR377W	1.3639	1.11308	1.23849	1.57522	0.88673	1.23098	1.82376	2.68121	2.25248	0.00264347	0.986391	-0.259769	0.0582852	N	N	0	1	0	1
YDR379C-A	0.68195	0.742055	0.712002	0.78761	0.295577	0.541593	0.91188	1.07248	0.992182	0.118808	0.613827	-0.14411	0.0284742	N	N	0	0	1	1
YDR380W	3.40975	2.96822	3.18898	1.57522	1.77346	1.67434	0.91188	2.68121	1.79654	0.279809	0.0553955	0.249214	0.238305	N	N	0	1	0	1
YDR381C-A	0.68195	0.742055	0.712002	0.78761	0.295577	0.541593	0.91188	2.14497	1.52842	0.118808	0.613827	-0.331763	0.167404	N	N	0	1	0	1
YDR382W	2.7278	3.33925	3.03352	4.72566	6.79827	5.76196	11.2465	12.8698	12.0582	-0.278623	0.209397	-0.599334	0.00399913	N	N	1	1	1	3
YDR385W	64.1033	50.8307	57.467	28.354	39.6073	33.9806	84.8049	82.5813	83.6931	0.228187	0.117425	-0.163271	0.158899	N	N	0	1	0	1
YDR388W	7.50145	5.56541	6.53343	2.36283	5.0248	3.69382	5.47128	8.04363	6.75745	0.247666	0.238281	-0.014642	0.543295	N	N	0	1	0	1
YDR390C	2.04585	1.48411	1.76498	0.78761	1.18231	0.984958	1.5198	3.21745	2.36863	0.253322	0.165363	-0.127757	0.199908	N	N	0	1	0	1
YDR394W	0.68195	3.33925	2.0106	5.51327	5.32038	5.41683	6.38316	9.11611	7.74964	-0.43042	0.235234	-0.585956	0.0816293	N	N	0	1	0	1
YDR395W	11.5931	10.0177	10.8054	6.30088	5.32038	5.81063	9.72672	11.2611	10.4939	0.269419	0.0475237	0.0127055	0.944347	N	N	0	2	0	2
YDR406W	23.1863	12.2439	17.7151	6.30088	5.0248	5.66284	7.29504	6.4349	6.86497	0.495309	0.267648	0.411705	0.291932	N	N	0	1	0	1
YDR418W	4.77365	4.0813	4.42747	7.8761	4.43365	6.15488	7.29504	9.65235	8.4737	-0.143063	0.495192	-0.281917	0.0354378	N	N	1	1	1	3
YDR420W	38.8711	27.456	33.1636	4.72566	7.685	6.20533	8.51088	15.0148	11.7628	0.727897	0.114893	0.45015	0.157317	N	N	0	0	1	1
YDR423C	4.0917	4.0813	4.0865	2.36283	3.25134	2.80709	1.5198	3.75369	2.63675	0.163096	0.212723	0.190283	0.356328	N	N	0	1	0	1
YDR427W	2.7278	2.59719	2.66249	1.57522	2.66019	2.11771	6.38316	8.57987	7.48152	0.0994233	0.49719	-0.448701	0.0616266	N	N	1	1	0	2
YDR432W	9.54729	4.0813	6.8143	5.51327	2.66019	4.08673	4.5594	4.28994	4.42467	0.222045	0.494609	0.18754	0.533773	N	N	0	1	0	1
YDR441C	2.7278	1.85514	2.29147	3.15044	1.77346	2.46195	1.82376	1.60873	1.71624	-0.0311655	0.856749	0.125535	0.383308	N	N	0	0	1	1
YDR456W	4.77365	4.0813	4.42747	1.57522	2.95577	2.26549	4.5594	9.65235	7.10588	0.290993	0.149239	-0.205462	0.178737	N	N	1	1	0	2
YDR461W	0.68195	0.371027	0.526488	0.78761	0.295577	0.541593	0.30396	0.536242	0.420101	-0.0122844	0.964075	0.0980352	0.811182	N	N	0	1	1	2
YDR463W	4.0917	3.71027	3.90099	2.36283	2.95577	2.6593	3.34356	2.68121	3.01239	0.166407	0.0901142	0.112264	0.0546903	N	N	0	1	0	1
YDR464W	17.0487	11.1308	14.0898	5.51327	4.43365	4.97346	5.16732	6.4349	5.80111	0.452246	0.190213	0.385393	0.222917	N	N	0	1	0	1
YDR471W	3.40975	1.85514	2.63244	2.36283	1.47788	1.92036	3.0396	2.68121	2.86041	0.136977	0.527549	-0.0360687	0.888	N	N	1	2	0	3
YDR477W	4.77365	2.59719	3.68542	2.36283	1.47788	1.92036	2.43168	2.14497	2.28832	0.283105	0.328143	0.206969	0.40519	N	N	0	0	1	1
YDR497C	17.0487	20.0355	18.5421	7.8761	12.1186	9.99737	19.4534	21.4497	20.4516	0.268273	0.093568	-0.0425673	0.335057	N	N	1	5	3	9
YDR500C	3.40975	2.96822	3.18898	5.51327	3.8425	4.67788	13.9822	10.1886	12.0854	-0.166397	0.311365	-0.578608	0.0633242	N	N	0	1	0	1
YDR502C	15.0029	11.1308	13.0669	11.0265	11.8231	11.4248	25.2287	21.9859	23.6073	0.0583223	0.549746	-0.256875	0.0876239	N	N	0	1	0	1
YDR504C	0.68195	0.371027	0.526488	0.78761	0.591154	0.689382	0.91188	0.536242	0.724061	-0.117071	0.483583	-0.138386	0.636355	N	N	1	1	0	2
YDR507C	6.13755	3.33925	4.7384	0.78761	0.88673	0.83717	2.12772	1.60873	1.86822	0.752818	0.218846	0.404203	0.275532	N	N	0	0	1	1
YDR508C	11.5931	8.1626	9.87787	7.8761	5.91154	6.89382	6.99108	11.2611	9.12608	0.156204	0.299525	0.0343791	0.892587	N	N	0	1	1	2
YDR510W	2.7278	0.742055	1.73493	5.51327	2.06904	3.79115	2.43168	4.82618	3.62893	-0.33949	0.43201	-0.320497	0.191584	N	N	0	0	1	1
YDR524C-B	6.13755	4.82336	5.48045	7.08849	6.20711	6.6478	18.8455	11.2611	15.0533	-0.0838617	0.294686	-0.438815	0.124625	N	N	2	2	2	6
YDR529C	2.04585	0.371027	1.20844	1.57522	0.295577	0.935398	0.60792	3.21745	1.91269	0.111228	0.821266	-0.199419	0.335986	N	N	0	1	0	1
YDR531W	2.7278	6.30747	4.51763	4.72566	4.13807	4.43187	4.5594	8.57987	6.56964	0.0083241	0.969618	-0.16263	0.305613	N	N	0	2	1	3
YDR533C	0.68195	0.371027	0.526488	2.36283	0.591154	1.47699	1.82376	1.60873	1.71624	-0.447989	0.474241	-0.51319	0.0615724	N	N	0	1	0	1
YDR539W	3.40975	2.22616	2.81796	3.15044	1.18231	2.16637	3.64752	6.4349	5.04121	0.114201	0.63832	-0.252601	0.0885354	N	N	0	1	0	1
YEL001C	4.77365	1.48411	3.12888	3.15044	2.06904	2.60974	2.73564	5.89866	4.31715	0.0787917	0.807474	-0.139809	0.426885	N	N	0	1	0	1
YEL007W	6.13755	3.71027	4.92391	3.15044	0.88673	2.01859	4.86336	5.36242	5.11289	0.387263	0.222706	-0.0163563	0.83908	N	N	0	1	1	2
YEL009C	6.13755	4.0813	5.10942	4.72566	5.91154	5.3186	17.3257	18.2322	17.779	-0.0174252	0.879821	-0.541535	0.0415502	N	N	1	5	0	6
YEL012W	0.68195	0.371027	0.526488	0.78761	0.591154	0.689382	2.43168	2.68121	2.55644	-0.117071	0.483583	-0.686248	0.0251688	N	N	0	1	0	1
YEL013W	4.77365	2.59719	3.68542	4.72566	3.54692	4.13629	6.0792	5.36242	5.72081	-0.0501241	0.759385	-0.190971	0.331741	N	N	0	2	0	2
YEL017C-A	4.0917	2.22616	3.15893	0.78761	2.95577	1.87169	4.5594	4.82618	4.69279	0.227307	0.46488	-0.171891	0.334753	N	N	0	2	0	2
YEL022W	12.2751	8.1626	10.2188	2.36283	4.43365	3.39824	6.38316	9.11611	7.74964	0.478148	0.138213	0.120121	0.540135	N	N	0	1	0	1
YEL023C	2.04585	0.742055	1.39395	0.78761	0.591154	0.689382	0.91188	1.60873	1.2603	0.305788	0.472711	0.0437728	0.960825	N	N	0	1	0	1
YEL024W	2.04585	0.371027	1.20844	0.78761	0.295577	0.541593	1.5198	1.60873	1.56426	0.348551	0.568874	-0.112085	0.730031	N	N	0	1	0	1
YEL026W	2.7278	1.48411	2.10595	3.93805	3.25134	3.5947	6.99108	4.82618	5.90863	-0.232213	0.206012	-0.448038	0.060176	N	N	1	0	0	1
YEL027W	0.68195	1.85514	1.26854	4.72566	1.77346	3.24956	7.29504	9.11611	8.20558	-0.408519	0.390656	-0.810804	0.0120777	N	N	0	2	0	2
YEL031W	26.596	28.5691	27.5826	13.3894	15.0744	14.2319	17.6297	28.9571	23.2934	0.287372	0.0100999	0.0734024	0.698907	N	N	0	0	1	1
YEL034W	1.3639	0.742055	1.05298	0.78761	0.591154	0.689382	1.21584	1.07248	1.14416	0.183959	0.440346	-0.0360687	0.888	N	N	1	0	0	1
YEL036C	4.0917	3.33925	3.71547	1.57522	2.36461	1.96992	1.82376	1.60873	1.71624	0.275566	0.0855393	0.335435	0.109589	N	N	0	0	2	2
YEL037C	4.0917	5.19438	4.64304	3.93805	1.77346	2.85576	3.64752	4.28994	3.96873	0.211081	0.317574	0.0681511	0.517318	N	N	0	1	1	2
YEL043W	8.1834	5.93644	7.05992	2.36283	3.54692	2.95488	5.47128	5.89866	5.68497	0.37826	0.119195	0.0940713	0.460379	N	N	1	0	0	1
YEL045C	0.68195	0.371027	0.526488	0.78761	0.295577	0.541593	0.30396	1.07248	0.688222	-0.0122844	0.964075	-0.11634	0.29357	N	N	0	1	0	1
YEL046C	24.5502	26.3429	25.4466	22.0531	20.9859	21.5195	32.2198	27.8846	30.0522	0.0727967	0.0868929	-0.0722467	0.133618	N	N	0	1	1	2
YEL047C	7.50145	7.42055	7.461	5.51327	8.57173	7.0425	8.20692	12.3336	10.2702	0.0250701	0.82995	-0.138784	0.166575	N	N	1	0	0	1
YEL053C	5.4556	4.0813	4.76845	0.78761	1.47788	1.13275	3.34356	2.14497	2.74426	0.624244	0.0729465	0.239951	0.142132	N	N	0	1	0	1
YEL055C	6.8195	1.85514	4.33732	2.36283	3.25134	2.80709	4.5594	2.68121	3.62031	0.188965	0.647766	0.0784759	0.716232	N	N	0	1	0	1
YEL060C	68.8769	54.912	61.8945	45.6814	35.4692	40.5753	32.5237	45.5806	39.0521	0.18339	0.143996	0.200007	0.175383	N	N	1	1	0	2
YEL061C	5.4556	3.33925	4.39742	2.36283	3.54692	2.95488	1.82376	1.07248	1.44812	0.172659	0.383409	0.482393	0.198059	N	N	0	0	1	1
YEL063C	15.0029	6.30747	10.6552	7.08849	7.38942	7.23895	10.6386	12.3336	11.4861	0.167885	0.575947	-0.0326112	0.82126	N	N	0	2	2	4
YEL065W	13.639	15.9542	14.7966	3.15044	7.98057	5.56551	8.81484	12.3336	10.5742	0.424657	0.116856	0.145914	0.157232	N	N	0	0	2	2
YEL068C	1.3639	1.11308	1.23849	1.57522	0.591154	1.08319	0.30396	1.07248	0.688222	0.0581894	0.806414	0.255164	0.278016	N	N	0	1	0	1
YEL073C	1.3639	1.11308	1.23849	1.57522	0.591154	1.08319	1.21584	1.07248	1.14416	0.0581894	0.806414	0.0344052	0.481401	N	N	0	1	0	1
YER006W	3.40975	1.48411	2.44693	1.57522	1.77346	1.67434	4.5594	4.82618	4.69279	0.164778	0.568889	-0.28281	0.249794	N	N	0	0	1	1
YER008C	19.7765	14.099	16.9378	3.93805	4.13807	4.03806	5.47128	6.97114	6.22121	0.622684	0.137518	0.434982	0.165296	N	N	0	0	1	1
YER017C	11.5931	6.67849	9.13582	7.08849	4.43365	5.76107	6.38316	4.28994	5.33655	0.200244	0.38043	0.233487	0.319468	N	N	0	1	1	2
YER021W	8.1834	4.45233	6.31786	3.15044	2.66019	2.90532	6.99108	5.36242	6.17675	0.337377	0.314445	0.00981009	0.81874	N	N	2	0	0	2
YER024W	5.4556	4.82336	5.13948	3.15044	2.66019	2.90532	3.0396	2.68121	2.86041	0.247726	0.0349274	0.254491	0.0664059	N	N	0	1	0	1
YER026C	0.68195	0.742055	0.712002	1.57522	0.591154	1.08319	0.91188	1.07248	0.992182	-0.182222	0.588362	-0.14411	0.0284742	N	N	0	4	1	5
YER030W	0.68195	1.48411	1.08303	2.36283	1.18231	1.77257	1.21584	1.60873	1.41228	-0.213963	0.447455	-0.115281	0.473971	N	N	0	1	0	1
YER036C	10.2292	11.5018	10.8655	5.51327	8.27615	6.89471	13.6782	12.3336	13.0059	0.197536	0.170802	-0.0780883	0.167354	N	N	1	1	1	3
YER040W	4.0917	5.19438	4.64304	3.15044	1.47788	2.31416	3.0396	5.36242	4.20101	0.302409	0.164916	0.0434488	0.878489	N	N	1	2	0	3
YER043C	19.7765	23.7458	21.7611	19.6902	23.6461	21.6682	33.1316	49.3343	41.233	0.00185902	0.976549	-0.277563	0.0651376	N	N	2	1	1	4
YER045C	12.957	7.42055	10.1888	3.15044	4.13807	3.64426	7.599	8.57987	8.08944	0.446514	0.246257	0.100205	0.624041	N	N	0	1	0	1
YER048W-A	0.68195	0.371027	0.526488	0.78761	0.295577	0.541593	0.91188	0.536242	0.724061	-0.0122844	0.964075	-0.138386	0.636355	N	N	0	1	1	2
YER052C	30.6877	25.6009	28.1443	20.4779	17.439	18.9584	42.5544	43.9718	43.2631	0.171588	0.115562	-0.186727	0.0983606	N	N	0	0	1	1
YER053C	5.4556	1.11308	3.28434	3.93805	1.18231	2.56018	3.34356	3.75369	3.54863	0.108178	0.808854	-0.0336123	0.893476	N	N	0	1	0	1
YER056C	17.0487	14.099	15.5739	14.177	11.2319	12.7044	22.493	26.8121	24.6526	0.0884413	0.302431	-0.199465	0.0373572	N	N	0	1	0	1
YER062C	10.9112	5.93644	8.42382	17.3274	5.91154	11.6195	25.2287	24.1309	24.6798	-0.139678	0.678396	-0.466833	0.0949417	N	N	0	2	0	2
YER068W	6.13755	3.33925	4.7384	1.57522	2.66019	2.11771	1.82376	6.97114	4.39745	0.349766	0.285887	0.0324302	0.668395	N	N	0	1	0	1
YER069W	28.6419	27.085	27.8634	22.8407	19.8036	21.3222	25.5326	32.1745	28.8536	0.116203	0.0961273	-0.015165	0.330034	N	N	0	1	0	1
YER073W	54.556	48.9756	51.7658	28.354	32.5134	30.4337	48.9376	56.8416	52.8896	0.230688	0.030792	-0.00932748	0.469201	N	N	0	1	0	1
YER075C	4.77365	5.56541	5.16953	3.93805	3.54692	3.74249	5.77524	5.36242	5.56883	0.140291	0.124685	-0.032313	0.58908	N	N	0	1	0	1
YER081W	4.0917	4.0813	4.0865	3.93805	2.06904	3.00354	1.5198	5.36242	3.44111	0.133718	0.453236	0.0746529	0.798126	N	N	0	0	1	1
YER086W	12.2751	14.8411	13.5581	12.6018	7.98057	10.2912	14.894	16.0873	15.4906	0.119734	0.370354	-0.057871	0.321159	N	N	1	1	3	5
YER088C	17.0487	13.357	15.2029	6.30088	7.685	6.99294	7.90296	8.04363	7.9733	0.337266	0.107932	0.280288	0.159777	N	N	0	1	2	3
YER091C	119.341	74.9475	97.1444	87.4247	67.9827	77.7037	162.315	163.018	162.666	0.096976	0.537857	-0.223879	0.207406	N	N	0	2	2	4
YER099C	2.04585	4.0813	3.06357	2.36283	2.66019	2.51151	1.5198	4.28994	2.90487	0.0862935	0.683424	0.0231021	0.71177	N	N	1	0	0	1
YER102W	5.4556	3.71027	4.58294	5.51327	5.32038	5.41683	9.72672	7.50739	8.61705	-0.0726011	0.513348	-0.274215	0.0976212	N	N	0	1	1	2
YER103W	17.7307	8.53363	13.1322	7.08849	3.54692	5.31771	10.6386	8.57987	9.60924	0.392612	0.315132	0.135647	0.540364	N	N	0	1	0	1
YER105C	15.0029	18.1803	16.5916	7.08849	10.6408	8.86463	9.72672	10.1886	9.95766	0.272228	0.0847449	0.221731	0.150572	N	N	0	0	1	1
YER107C	2.7278	1.85514	2.29147	2.36283	0.88673	1.62478	0.91188	2.14497	1.52842	0.149319	0.534018	0.17587	0.492778	N	N	0	0	1	1
YER110C	12.957	11.5018	12.2294	7.08849	6.20711	6.6478	10.6386	12.8698	11.7542	0.264729	0.0358094	0.0172135	0.936939	N	N	0	1	2	3
YER114C	19.7765	12.6149	16.1957	5.51327	7.09384	6.30356	4.25544	5.36242	4.80893	0.409815	0.207803	0.527352	0.196675	N	N	0	1	1	2
YER115C	2.04585	0.742055	1.39395	0.78761	0.88673	0.83717	0.60792	0.536242	0.572081	0.221434	0.549584	0.38679	0.420107	N	N	1	0	0	1
YER117W	4.77365	2.59719	3.68542	6.30088	5.91154	6.10621	12.4624	13.9423	13.2023	-0.219285	0.260665	-0.554164	0.0477861	N	N	1	2	0	3
YER122C	6.13755	5.93644	6.03699	1.57522	2.95577	2.26549	7.29504	8.57987	7.93746	0.425658	0.109229	-0.118861	0.0694769	N	N	0	1	0	1
YER123W	6.8195	2.96822	4.89386	3.93805	1.77346	2.85576	3.34356	2.14497	2.74426	0.23393	0.475264	0.251225	0.42052	N	N	1	0	0	1
YER125W	15.0029	14.8411	14.922	8.66371	7.38942	8.02656	8.51088	12.8698	10.6903	0.269297	0.0551209	0.144835	0.210882	N	N	2	0	0	2
YER129W	10.2292	15.2121	12.7207	4.72566	7.09384	5.90975	7.90296	6.97114	7.43705	0.332941	0.180156	0.23311	0.267688	N	N	0	1	0	1
YER130C	10.2292	7.42055	8.8249	4.72566	2.36461	3.54514	11.2465	5.89866	8.57259	0.396077	0.10598	0.0125975	0.498738	N	N	0	0	1	1
YER131W	1.3639	1.11308	1.23849	1.57522	0.88673	1.23098	3.64752	3.21745	3.43249	0.00264347	0.986391	-0.442716	0.00677156	N	N	0	1	1	2
YER132C	37.5072	28.9401	33.2237	6.30088	7.38942	6.84515	6.68712	9.11611	7.90162	0.686065	0.098015	0.623732	0.103628	N	N	0	1	0	1
YER133W	8.1834	4.0813	6.13235	2.36283	2.06904	2.21593	10.3346	9.11611	9.72538	0.44207	0.305849	-0.20028	0.350516	N	N	0	2	0	2
YER136W	4.77365	4.45233	4.61299	7.8761	5.0248	6.45045	7.90296	10.7248	9.3139	-0.145608	0.418059	-0.305149	0.070322	N	N	1	0	0	1
YER151C	10.2292	14.099	12.1641	3.93805	2.95577	3.44691	4.86336	4.82618	4.84477	0.547652	0.121629	0.399808	0.164322	N	N	0	0	1	1
YER155C	79.1062	47.8625	63.4843	22.0531	19.2125	20.6328	23.101	26.8121	24.9565	0.488109	0.220111	0.405482	0.249679	N	N	0	2	2	4
YER165W	29.3238	20.7775	25.0507	11.8141	19.8036	15.8089	33.1316	38.0732	35.6024	0.199918	0.255453	-0.15266	0.200124	N	N	0	1	1	2
YER166W	21.8224	26.714	24.2682	8.66371	8.27615	8.46993	10.0307	11.2611	10.6459	0.457157	0.0960332	0.357856	0.111117	N	N	0	0	1	1
YER169W	17.7307	9.27568	13.5032	7.08849	5.61596	6.35222	4.25544	5.89866	5.07705	0.32751	0.333473	0.424825	0.306666	N	N	0	0	1	1
YER175C	6.8195	3.71027	5.26488	2.36283	4.43365	3.39824	5.16732	6.97114	6.06923	0.190135	0.435958	-0.0617449	0.564406	N	N	0	0	1	1
YER177W	19.0946	11.5018	15.2982	11.8141	7.98057	9.89736	13.3742	18.7685	16.0714	0.189121	0.367988	-0.0214116	0.676654	N	N	0	3	0	3
YFL003C	0.68195	0.742055	0.712002	0.78761	0.295577	0.541593	0.30396	0.536242	0.420101	0.118808	0.613827	0.229128	0.105068	N	N	0	0	1	1
YFL004W	3.40975	2.22616	2.81796	1.57522	1.77346	1.67434	4.25544	3.75369	4.00457	0.226091	0.29731	-0.152621	0.314155	N	N	0	2	0	2
YFL014W	4.77365	1.11308	2.94336	2.36283	0.295577	1.3292	6.68712	1.60873	4.14792	0.345253	0.540649	-0.148987	0.979641	N	N	1	1	0	2
YFL018C	5.4556	4.82336	5.13948	1.57522	2.66019	2.11771	3.95148	3.75369	3.85259	0.385053	0.0610456	0.125166	0.140664	N	N	0	1	0	1
YFL022C	6.8195	9.27568	8.04759	4.72566	5.0248	4.87523	9.72672	8.57987	9.1533	0.217671	0.230895	-0.0559117	0.624489	N	N	0	0	2	2
YFL026W	2.04585	1.11308	1.57947	1.57522	0.591154	1.08319	0.60792	0.536242	0.572081	0.163807	0.540497	0.441053	0.271368	N	N	2	3	2	7
YFL027C	2.04585	1.11308	1.57947	1.57522	0.591154	1.08319	1.5198	2.14497	1.83238	0.163807	0.540497	-0.0645063	0.536737	N	N	0	1	0	1
YFL031W	35.4614	21.1486	28.305	37.0177	41.6763	39.347	67.1752	68.639	67.9071	-0.143049	0.349434	-0.380052	0.112028	N	N	3	4	4	11
YFL037W	3.40975	5.19438	4.30207	1.57522	2.66019	2.11771	0.91188	3.75369	2.33279	0.307811	0.197892	0.265802	0.389648	N	N	0	1	2	3
YFL039C	57.9657	34.1345	46.0501	19.6902	29.2621	24.4762	51.9772	67.0302	59.5037	0.274487	0.294711	-0.111313	0.370845	N	N	0	1	4	5
YFL048C	0.68195	0.371027	0.526488	1.57522	1.77346	1.67434	3.95148	3.21745	3.58447	-0.502455	0.0364023	-0.833036	0.00763489	N	N	0	1	0	1
YFR002W	9.54729	2.59719	6.07224	2.36283	2.06904	2.21593	4.86336	6.97114	5.91725	0.437792	0.466693	0.011229	0.932297	N	N	0	1	1	2
YFR006W	2.7278	3.71027	3.21904	1.57522	2.06904	1.82213	3.0396	1.60873	2.32416	0.247147	0.168935	0.141459	0.187291	N	N	1	0	0	1
YFR009W	3.40975	9.27568	6.34272	5.51327	3.8425	4.67788	3.34356	4.28994	3.81675	0.132226	0.671353	0.220582	0.577705	N	N	0	0	1	1
YFR015C	21.8224	6.67849	14.2504	5.51327	2.06904	3.79115	4.5594	3.75369	4.15655	0.575057	0.390789	0.535096	0.40358	N	N	0	0	1	1
YFR021W	2.04585	2.96822	2.50703	0.78761	1.77346	1.28054	1.21584	1.60873	1.41228	0.291769	0.211421	0.249238	0.264706	N	N	0	0	1	1
YFR022W	4.77365	12.986	8.8798	3.15044	2.36461	2.75753	4.25544	4.82618	4.54081	0.507884	0.374319	0.29127	0.492955	N	N	0	1	0	1
YFR030W	56.6018	47.1205	51.8611	31.5044	25.4196	28.462	34.6514	37.0007	35.8261	0.260577	0.0696589	0.160643	0.184947	N	N	0	0	1	1
YFR031C-A	4.0917	4.45233	4.27201	7.08849	5.0248	6.05665	9.1188	10.7248	9.92182	-0.1516	0.327127	-0.365959	0.0188364	N	N	1	1	1	3
YFR032C-A	2.04585	1.11308	1.57947	1.57522	2.95577	2.26549	7.29504	5.89866	6.59685	-0.156653	0.506988	-0.620827	0.01891	N	N	0	1	0	1
YFR038W	2.7278	2.22616	2.47698	2.36283	1.47788	1.92036	1.82376	3.21745	2.52061	0.110541	0.41259	-0.00758222	0.465744	N	N	0	2	0	2
YFR040W	13.639	8.90466	11.2718	7.08849	3.8425	5.46549	12.1584	10.1886	11.1735	0.314365	0.196701	0.00380502	0.84493	N	N	0	1	0	1
YFR042W	0.68195	0.371027	0.526488	0.78761	0.295577	0.541593	0.60792	1.60873	1.10832	-0.0122844	0.964075	-0.323277	0.128892	N	N	0	0	1	1
YFR049W	1.3639	1.85514	1.60952	0.78761	0.295577	0.541593	1.5198	1.07248	1.29614	0.473023	0.0916359	0.0940432	0.304743	N	N	0	1	0	1
YFR051C	6.13755	3.33925	4.7384	6.30088	4.72923	5.51505	3.34356	6.4349	4.88923	-0.0659184	0.687199	-0.0136092	0.635697	N	N	0	0	1	1
YFR052C-A	10.9112	5.19438	8.05279	3.15044	2.66019	2.90532	2.43168	3.75369	3.09269	0.442753	0.320966	0.41561	0.349308	N	N	0	2	2	4
YGL005C	0.68195	1.85514	1.26854	1.57522	0.88673	1.23098	1.5198	1.60873	1.56426	0.013056	0.961997	-0.0910045	0.683773	N	N	1	0	0	1
YGL006W	29.3238	25.9719	27.6479	15.7522	12.7098	14.231	11.5505	19.841	15.6957	0.288426	0.0278972	0.245881	0.0701167	N	N	0	1	0	1
YGL008C	411.898	343.942	377.92	252.823	252.423	252.623	454.42	524.445	489.432	0.174928	0.168571	-0.112293	0.114154	N	N	6	10	11	27
YGL012W	9.54729	7.79157	8.66943	4.72566	3.25134	3.9885	10.3346	15.0148	12.6747	0.337181	0.0578568	-0.164947	0.079606	N	N	1	1	0	2
YGL014W	16.3668	8.53363	12.4502	7.8761	5.91154	6.89382	5.16732	6.4349	5.80111	0.256717	0.380937	0.331665	0.351235	N	N	0	1	0	1
YGL020C	1.3639	1.11308	1.23849	1.57522	0.591154	1.08319	1.5198	2.68121	2.1005	0.0581894	0.806414	-0.229431	0.116649	N	N	0	2	0	2
YGL025C	2.7278	1.11308	1.92044	0.78761	0.295577	0.541593	1.5198	1.07248	1.29614	0.549727	0.320192	0.170748	0.527843	N	N	0	1	0	1
YGL026C	40.235	31.5373	35.8862	17.3274	19.5081	18.4177	33.7396	31.6383	32.6889	0.289691	0.138058	0.0405266	0.548297	N	N	1	0	1	2
YGL028C	10.2292	4.82336	7.5263	3.93805	3.25134	3.5947	7.29504	4.82618	6.06061	0.320919	0.380426	0.0940652	0.57997	N	N	1	2	1	4
YGL030W	5.4556	5.56541	5.5105	12.6018	7.09384	9.8478	15.502	24.6671	20.0845	-0.252148	0.360065	-0.561671	0.0858089	N	N	2	1	1	4
YGL036W	3.40975	1.85514	2.63244	1.57522	1.77346	1.67434	2.12772	4.28994	3.20883	0.196515	0.431527	-0.0859875	0.371671	N	N	1	0	0	1
YGL037C	11.5931	4.0813	7.83722	9.45132	7.38942	8.42037	6.38316	16.0873	11.2352	-0.031169	0.902875	-0.156419	0.340672	N	N	0	1	0	1
YGL038C	2.7278	2.59719	2.66249	1.57522	3.25134	2.41328	2.12772	2.14497	2.13634	0.0426807	0.816061	0.0956176	0.0781269	N	N	1	0	0	1
YGL043W	6.8195	2.59719	4.70834	2.36283	1.18231	1.77257	1.82376	2.68121	2.25248	0.424265	0.385408	0.320206	0.479758	N	N	0	0	1	1
YGL045W	3.40975	2.59719	3.00347	1.57522	1.18231	1.37876	1.5198	4.28994	2.90487	0.338134	0.109579	0.0144969	0.551895	N	N	1	0	1	2
YGL055W	216.86	163.994	190.427	214.23	215.18	214.705	488.768	501.922	495.345	-0.0521133	0.52701	-0.415179	0.0511907	N	N	1	0	0	1
YGL059W	3.40975	1.85514	2.63244	2.36283	1.77346	2.06815	2.73564	3.75369	3.24467	0.104778	0.598863	-0.0908112	0.455961	N	N	1	0	0	1
YGL060W	4.0917	1.11308	2.60239	1.57522	0.295577	0.935398	1.5198	3.21745	2.36863	0.444376	0.452468	0.0408759	0.919819	N	N	1	0	0	1
YGL066W	4.0917	1.85514	2.97342	3.15044	1.18231	2.16637	2.43168	4.28994	3.36081	0.137523	0.643025	-0.0531878	0.583997	N	N	0	0	1	1
YGL075C	0.68195	0.371027	0.526488	0.78761	0.295577	0.541593	0.60792	0.536242	0.572081	-0.0122844	0.964075	-0.0360687	0.888	N	N	0	1	0	1
YGL076C	3.40975	2.22616	2.81796	3.93805	0.88673	2.41239	4.86336	5.89866	5.38101	0.0674867	0.837766	-0.28093	0.091512	N	N	1	0	1	2
YGL077C	7.50145	5.93644	6.71894	6.30088	5.32038	5.81063	13.3742	11.7973	12.5858	0.0630776	0.445375	-0.272579	0.0489024	N	N	0	1	0	1
YGL080W	2.04585	0.742055	1.39395	0.78761	0.591154	0.689382	0.30396	1.07248	0.688222	0.305788	0.472711	0.306519	0.572313	N	N	0	1	0	1
YGL082W	0.68195	0.742055	0.712002	0.78761	1.18231	0.984958	1.82376	0.536242	1.18	-0.140937	0.394565	-0.219401	0.728724	N	N	0	1	0	1
YGL088W	100.929	136.538	118.733	48.0442	54.9773	51.5107	52.5851	60.0591	56.3221	0.362675	0.153865	0.323894	0.178737	N	N	0	1	1	2
YGL098W	1.3639	0.742055	1.05298	0.78761	0.88673	0.83717	0.91188	1.60873	1.2603	0.0996052	0.612921	-0.0780561	0.421372	N	N	2	2	2	6
YGL103W	6.13755	4.0813	5.10942	5.51327	2.06904	3.79115	8.81484	9.11611	8.96548	0.129601	0.591386	-0.244201	0.161187	N	N	0	1	2	3
YGL106W	0.68195	1.11308	0.897516	1.57522	0.88673	1.23098	3.0396	3.75369	3.39665	-0.137207	0.511753	-0.578008	0.0119957	N	N	0	1	0	1
YGL107C	2.7278	2.59719	2.66249	1.57522	1.47788	1.52655	3.0396	2.68121	2.86041	0.241577	0.00691601	-0.0311387	0.439777	N	N	0	1	0	1
YGL115W	2.04585	1.11308	1.57947	1.57522	0.295577	0.935398	2.12772	2.68121	2.40446	0.227514	0.508216	-0.182508	0.267729	N	N	0	0	1	1
YGL121C	2.7278	2.59719	2.66249	3.93805	2.95577	3.44691	5.16732	6.97114	6.06923	-0.112141	0.352487	-0.357845	0.0690049	N	N	0	1	0	1
YGL123W	12.957	12.986	12.9715	17.3274	10.0496	13.6885	26.1406	25.2034	25.672	-0.0233661	0.876146	-0.296469	0.0116466	N	N	1	2	1	4
YGL125W	22.5043	23.3747	22.9395	13.3894	13.301	13.3452	17.9336	17.1597	17.5467	0.235261	0.0273262	0.116389	0.0237984	N	N	1	5	2	8
YGL129C	0.68195	0.742055	0.712002	2.36283	1.77346	2.06815	1.5198	3.21745	2.36863	-0.4631	0.133098	-0.522015	0.126574	N	N	0	1	0	1
YGL142C	2.04585	1.85514	1.95049	1.57522	1.18231	1.37876	0.91188	3.75369	2.33279	0.150655	0.165661	-0.0777307	0.363442	N	N	1	0	1	2
YGL145W	1.3639	2.22616	1.79503	0.78761	0.591154	0.689382	3.34356	4.82618	4.08487	0.415612	0.222941	-0.357106	0.0446188	N	N	1	0	0	1
YGL147C	4.0917	1.85514	2.97342	3.15044	5.32038	4.23541	7.599	7.50739	7.55319	-0.15364	0.503083	-0.404875	0.153072	N	N	0	1	0	1
YGL150C	32.0516	23.3747	27.7132	11.8141	6.79827	9.30621	11.5505	14.4785	13.0145	0.473914	0.0924295	0.328259	0.183407	N	N	0	2	0	2
YGL155W	0.68195	1.85514	1.26854	4.72566	0.295577	2.51062	1.21584	0.536242	0.876041	-0.296475	0.674597	0.160781	0.507827	N	N	0	0	1	1
YGL157W	4.77365	2.22616	3.49991	3.15044	2.66019	2.90532	5.16732	6.4349	5.80111	0.0808631	0.722129	-0.219455	0.273937	N	N	0	1	0	1
YGL167C	19.0946	15.5831	17.3389	11.8141	8.57173	10.1929	13.3742	14.4785	13.9264	0.230721	0.0967317	0.0951823	0.319303	N	N	0	1	0	1
YGL169W	2.04585	0.742055	1.39395	2.36283	0.591154	1.47699	2.12772	2.14497	2.13634	-0.0251303	0.947221	-0.185423	0.456905	N	N	0	0	1	1
YGL178W	15.6848	8.53363	12.1092	5.51327	4.72923	5.12125	12.4624	20.3772	16.4198	0.373741	0.298091	-0.132251	0.296114	N	N	1	2	1	4
YGL179C	3.40975	3.71027	3.56001	3.93805	2.06904	3.00354	1.5198	3.21745	2.36863	0.0738174	0.657709	0.176955	0.299264	N	N	1	0	0	1
YGL190C	9.54729	5.19438	7.37084	1.57522	2.36461	1.96992	3.64752	3.75369	3.70061	0.573069	0.234928	0.299244	0.342753	N	N	0	1	0	1
YGL191W	1.3639	0.371027	0.867463	0.78761	0.295577	0.541593	0.91188	1.60873	1.2603	0.204578	0.634192	-0.162224	0.447033	N	N	0	0	1	1
YGL196W	3.40975	3.71027	3.56001	3.15044	1.18231	2.16637	3.0396	1.60873	2.32416	0.215718	0.387298	0.185185	0.102058	N	N	1	0	0	1
YGL202W	15.0029	8.90466	11.9538	7.08849	5.32038	6.20444	8.51088	10.1886	9.34974	0.284803	0.293114	0.106706	0.603496	N	N	1	1	1	3
YGL203C	5.4556	4.0813	4.76845	2.36283	3.25134	2.80709	4.86336	3.75369	4.30853	0.230121	0.159512	0.0440483	0.467416	N	N	0	1	0	1
YGL206C	59.3296	40.442	49.8858	17.3274	14.4833	15.9053	29.7881	39.6819	34.735	0.496434	0.165815	0.15721	0.397771	N	N	0	3	1	4
YGL207W	11.5931	11.8729	11.733	3.15044	5.61596	4.3832	6.68712	11.7973	9.24222	0.427618	0.10217	0.103633	0.515357	N	N	0	1	0	1
YGL215W	14.3209	6.67849	10.4997	9.45132	8.27615	8.86373	13.0703	19.3047	16.1875	0.0735609	0.742622	-0.188002	0.280593	N	N	0	2	1	3
YGL234W	19.7765	15.9542	17.8654	7.08849	8.57173	7.83011	9.72672	13.9423	11.8345	0.358244	0.086494	0.178862	0.185117	N	N	0	2	0	2
YGL238W	2.7278	5.93644	4.33212	2.36283	3.54692	2.95488	8.20692	9.65235	8.92964	0.166161	0.543934	-0.314134	0.18506	N	N	0	1	0	1
YGL245W	19.7765	17.0673	18.4219	7.8761	8.8673	8.3717	16.4138	17.1597	16.7868	0.342521	0.0582927	0.0403667	0.476524	N	N	0	0	1	1
YGL251C	3.40975	1.11308	2.26142	1.57522	0.591154	1.08319	0.91188	1.60873	1.2603	0.319677	0.482924	0.253905	0.601832	N	N	0	0	1	1
YGL252C	5.4556	4.82336	5.13948	2.36283	2.95577	2.6593	3.0396	3.21745	3.12853	0.286152	0.0294771	0.215579	0.096053	N	N	0	1	0	1
YGL253W	21.8224	12.6149	17.2187	15.7522	12.4142	14.0832	25.2287	31.6383	28.4335	0.0872976	0.618632	-0.217831	0.190821	N	N	0	2	1	3
YGL255W	4.77365	2.22616	3.49991	2.36283	1.77346	2.06815	1.82376	1.60873	1.71624	0.228475	0.456975	0.309478	0.385555	N	N	2	5	0	7
YGR008C	7.50145	4.0813	5.79137	2.36283	1.47788	1.92036	2.73564	6.4349	4.58527	0.4794	0.248565	0.101416	0.901606	N	N	0	1	1	2
YGR014W	16.3668	9.27568	12.8212	3.15044	4.43365	3.79205	5.77524	10.7248	8.25004	0.529056	0.229213	0.191474	0.51335	N	N	1	1	1	3
YGR017W	2.7278	1.11308	1.92044	2.36283	0.591154	1.47699	4.25544	1.60873	2.93208	0.114023	0.747167	-0.183775	0.770412	N	N	1	1	0	2
YGR026W	2.04585	1.11308	1.57947	1.57522	1.18231	1.37876	4.86336	2.14497	3.50416	0.0590204	0.745455	-0.346074	0.285101	N	N	0	0	1	1
YGR027C	2.7278	2.22616	2.47698	1.57522	4.13807	2.85665	12.7663	12.8698	12.8181	-0.0619339	0.817173	-0.7139	0.014365	N	N	0	1	0	1
YGR029W	1.3639	1.48411	1.424	1.57522	0.591154	1.08319	0.91188	1.07248	0.992182	0.118808	0.613827	0.15692	0.0432585	N	N	1	0	0	1
YGR032W	250.276	238.942	244.609	122.08	127.098	124.589	119.76	147.467	133.613	0.292993	0.0120347	0.262622	0.00839396	N	N	0	1	0	1
YGR034W	6.8195	4.82336	5.82143	6.30088	4.72923	5.51505	9.1188	12.3336	10.7262	0.0234796	0.832974	-0.265416	0.0508261	N	N	1	2	0	3
YGR037C	4.77365	4.82336	4.7985	1.57522	9.75403	5.66463	11.2465	12.3336	11.79	-0.0720656	0.86713	-0.39041	0.0227057	N	N	1	2	2	5
YGR040W	1.3639	1.48411	1.424	0.78761	0.295577	0.541593	1.5198	1.60873	1.56426	0.419838	0.156539	-0.0407985	0.19443	N	N	1	1	0	2
YGR046W	1.3639	1.85514	1.60952	1.57522	1.47788	1.52655	4.25544	1.60873	2.93208	0.0229843	0.793149	-0.26048	0.492524	N	N	2	0	1	3
YGR052W	1.3639	0.742055	1.05298	0.78761	0.591154	0.689382	0.60792	0.536242	0.572081	0.183959	0.440346	0.264961	0.354134	N	N	0	1	1	2
YGR054W	8.86534	5.56541	7.21538	5.51327	5.91154	5.7124	5.47128	9.11611	7.2937	0.10144	0.528486	-0.00468863	0.664548	N	N	0	0	1	1
YGR055W	30.6877	17.4383	24.063	20.4779	7.38942	13.9336	28.8762	17.1597	23.018	0.237285	0.390333	0.0192829	0.65888	N	N	1	4	2	7
YGR061C	23.8682	34.8766	29.3724	14.177	13.0054	13.5912	15.8059	23.0584	19.4322	0.334682	0.21028	0.179418	0.363041	N	N	0	0	1	1
YGR065C	0.68195	1.48411	1.08303	3.15044	0.591154	1.8708	2.12772	3.21745	2.67259	-0.237386	0.64842	-0.392291	0.0750829	N	N	0	1	0	1
YGR071C	1.3639	1.11308	1.23849	1.57522	1.18231	1.37876	1.21584	2.14497	1.6804	-0.046597	0.617672	-0.132521	0.161394	N	N	0	0	1	1
YGR077C	1.3639	1.48411	1.424	1.57522	1.77346	1.67434	1.82376	1.07248	1.44812	-0.0703324	0.189957	-0.00729386	0.539081	N	N	0	0	1	1
YGR084C	0.68195	1.11308	0.897516	0.78761	0.295577	0.541593	1.21584	1.60873	1.41228	0.219369	0.391861	-0.19688	0.173611	N	N	0	1	0	1
YGR086C	15.0029	5.56541	10.2842	4.72566	3.54692	4.13629	6.38316	9.11611	7.74964	0.395557	0.414253	0.122887	0.762167	N	N	1	5	0	6
YGR089W	4.0917	2.22616	3.15893	0.78761	3.25134	2.01948	3.64752	4.28994	3.96873	0.194301	0.542493	-0.0991112	0.484375	N	N	0	0	1	1
YGR090W	17.7307	6.67849	12.2046	3.15044	6.20711	4.67878	9.1188	7.50739	8.31309	0.416391	0.392273	0.166761	0.579144	N	N	0	1	1	2
YGR092W	2.04585	1.11308	1.57947	1.57522	1.77346	1.67434	1.21584	1.60873	1.41228	-0.0253336	0.872849	0.0485884	0.907029	N	N	0	1	0	1
YGR093W	1.3639	1.11308	1.23849	1.57522	1.47788	1.52655	3.0396	1.07248	2.05604	-0.0908188	0.23054	-0.220139	0.626448	N	N	0	0	1	1
YGR098C	4.77365	5.19438	4.98402	2.36283	1.47788	1.92036	3.0396	4.28994	3.66477	0.414197	0.0521671	0.133533	0.133233	N	N	0	1	0	1
YGR105W	0.68195	0.371027	0.526488	2.36283	0.591154	1.47699	0.60792	2.14497	1.37644	-0.447989	0.474241	-0.41737	0.155335	N	N	0	1	0	1
YGR116W	16.3668	11.1308	13.7488	6.30088	5.32038	5.81063	11.2465	11.2611	11.2538	0.374042	0.192761	0.0869657	0.515773	N	N	0	1	1	2
YGR118W	6.8195	5.19438	6.00694	5.51327	4.43365	4.97346	9.72672	10.1886	9.95766	0.0819946	0.414335	-0.219504	0.119713	N	N	1	2	0	3
YGR128C	2.7278	1.11308	1.92044	0.78761	2.95577	1.87169	4.86336	3.21745	4.04041	0.0111672	0.97474	-0.323024	0.241797	N	N	0	1	0	1
YGR135W	2.04585	1.48411	1.76498	1.57522	1.77346	1.67434	3.95148	8.04363	5.99755	0.0228959	0.803855	-0.531235	0.102956	N	N	0	1	0	1
YGR142W	12.957	11.8729	12.415	4.72566	9.16288	6.94427	7.599	13.9423	10.7706	0.252319	0.229942	0.0617036	0.976944	N	N	1	0	1	2
YGR143W	7.50145	8.90466	8.20305	3.93805	4.72923	4.33364	5.16732	9.11611	7.14172	0.277123	0.0634024	0.0601728	0.957282	N	N	1	1	0	2
YGR146C	5.4556	5.93644	5.69602	5.51327	6.20711	5.86019	12.4624	17.696	15.0792	-0.0123404	0.738829	-0.422806	0.0694211	N	N	0	0	1	1
YGR148C	8.1834	2.59719	5.39029	3.93805	3.25134	3.5947	11.8544	16.6235	14.239	0.17595	0.635891	-0.421866	0.132784	N	N	0	1	0	1
YGR155W	16.3668	7.04952	11.7082	11.0265	12.7098	11.8682	29.1802	29.4933	29.3367	-0.00589528	0.978231	-0.398923	0.163694	N	N	0	2	3	5
YGR157W	12.957	6.30747	9.63225	5.51327	5.32038	5.41683	9.72672	12.8698	11.2983	0.249983	0.425015	-0.0692838	0.593699	N	N	1	6	1	8
YGR159C	8.1834	8.1626	8.173	6.30088	5.91154	6.10621	21.8851	18.7685	20.3268	0.12661	0.0591345	-0.395687	0.0435058	N	N	1	0	0	1
YGR162W	28.6419	23.0037	25.8228	7.08849	10.3452	8.71684	10.3346	12.8698	11.6022	0.471644	0.053874	0.347462	0.11636	N	N	1	0	0	1
YGR177C	4.77365	4.0813	4.42747	3.93805	2.66019	3.29912	5.16732	5.89866	5.53299	0.127758	0.295026	-0.0968039	0.1161	N	N	0	1	1	2
YGR180C	11.5931	11.1308	11.362	16.5398	14.1877	15.3637	34.3475	47.1893	40.7684	-0.131043	0.170832	-0.554869	0.061256	N	N	0	1	0	1
YGR182C	1.3639	0.371027	0.867463	0.78761	1.18231	0.984958	0.30396	1.60873	0.956343	-0.0551668	0.855235	-0.0423625	0.566722	N	N	0	1	0	1
YGR183C	0.68195	0.371027	0.526488	0.78761	0.88673	0.83717	1.21584	2.68121	1.94852	-0.201425	0.274277	-0.568317	0.0902796	N	N	0	1	0	1
YGR184C	38.8711	28.5691	33.7201	13.3894	12.4142	12.9018	13.6782	18.2322	15.9552	0.417239	0.151681	0.324986	0.177518	N	N	0	0	1	1
YGR187C	1.3639	1.11308	1.23849	1.57522	1.18231	1.37876	3.0396	3.75369	3.39665	-0.046597	0.617672	-0.438158	0.0123868	N	N	0	1	0	1
YGR189C	7.50145	3.71027	5.60586	3.15044	0.591154	1.8708	3.34356	5.89866	4.62111	0.476616	0.26086	0.0838958	0.886819	N	N	0	0	2	2
YGR191W	10.9112	7.79157	9.35138	3.15044	6.20711	4.67878	8.51088	7.50739	8.00913	0.300744	0.165804	0.0672903	0.490688	N	N	0	2	0	2
YGR192C	165.714	102.033	133.873	76.3982	86.604	81.5011	127.055	158.728	142.891	0.21553	0.342409	-0.0283128	0.688871	N	N	3	4	5	12
YGR202C	2.7278	2.59719	2.66249	3.93805	2.06904	3.00354	4.25544	8.04363	6.14953	-0.0523451	0.777268	-0.363553	0.13252	N	N	0	0	1	1
YGR204W	85.9257	81.626	83.7758	38.5929	47.2923	42.9426	38.299	57.9141	48.1065	0.290231	0.0326232	0.240915	0.0636229	N	N	1	0	2	3
YGR208W	4.0917	0.742055	2.41688	0.78761	1.77346	1.28054	2.43168	2.14497	2.28832	0.275863	0.619231	0.0237369	0.924264	N	N	0	1	0	1
YGR211W	14.3209	12.6149	13.4679	10.2389	10.6408	10.4398	8.81484	15.0148	11.9148	0.110607	0.159294	0.053214	0.998782	N	N	1	0	0	1
YGR214W	17.7307	9.64671	13.6887	9.45132	9.75403	9.60268	17.9336	14.4785	16.2061	0.15397	0.4964	-0.0733159	0.753262	N	N	1	0	0	1
YGR218W	30.6877	24.8588	27.7733	13.3894	12.1186	12.754	13.3742	15.551	14.4626	0.337981	0.109071	0.28338	0.132853	N	N	1	2	2	5
YGR231C	6.8195	2.22616	4.52283	2.36283	3.25134	2.80709	3.34356	4.28994	3.81675	0.207154	0.59008	0.0737168	0.871754	N	N	0	1	0	1
YGR233C	12.2751	8.90466	10.5899	7.8761	7.685	7.78055	9.1188	5.36242	7.24061	0.133881	0.343262	0.165116	0.190353	N	N	0	0	1	1
YGR244C	15.6848	7.04952	11.3672	6.30088	5.32038	5.81063	12.4624	13.406	12.9342	0.291429	0.418495	-0.056087	0.748188	N	N	0	0	1	1
YGR249W	2.7278	1.11308	1.92044	0.78761	0.295577	0.541593	0.91188	2.14497	1.52842	0.549727	0.320192	0.099157	0.93568	N	N	2	0	0	2
YGR250C	13.639	8.1626	10.9008	3.93805	7.09384	5.51595	7.29504	14.4785	10.8868	0.295838	0.26064	0.000558555	0.648336	N	N	0	1	0	1
YGR254W	94.791	57.5092	76.1501	55.9203	49.6569	52.7886	98.1791	100.277	99.2282	0.15913	0.424647	-0.114964	0.42544	N	N	1	0	0	1
YGR258C	10.2292	14.099	12.1641	7.8761	5.0248	6.45045	4.5594	7.50739	6.03339	0.275491	0.151494	0.30452	0.186486	N	N	0	1	0	1
YGR264C	12.2751	7.42055	9.84782	4.72566	5.0248	4.87523	15.502	12.8698	14.1859	0.305345	0.288099	-0.158516	0.358867	N	N	0	1	1	2
YGR267C	6.8195	6.67849	6.74899	3.93805	2.66019	3.29912	8.51088	6.97114	7.74101	0.310841	0.113059	-0.0595587	0.353199	N	N	0	0	1	1
YGR279C	66.8311	51.2018	59.0164	48.0442	59.4109	53.7276	95.7474	107.785	101.766	0.0407757	0.643579	-0.23663	0.0758023	N	N	0	5	3	8
YGR282C	20.4585	14.099	17.2788	16.5398	18.3258	17.4328	34.9554	46.653	40.8042	-0.00385407	0.969527	-0.373192	0.0260853	N	N	3	1	1	5
YGR286C	5.4556	2.59719	4.02639	2.36283	1.77346	2.06815	3.34356	5.89866	4.62111	0.289335	0.39459	-0.0598301	0.543064	N	N	0	1	0	1
YHL011C	6.13755	2.22616	4.18186	1.57522	2.06904	1.82213	4.86336	4.28994	4.57665	0.36079	0.438306	-0.0391785	0.918645	N	N	1	0	1	2
YHL014C	1.3639	0.742055	1.05298	1.57522	0.591154	1.08319	2.12772	1.60873	1.86822	-0.0122844	0.964075	-0.24901	0.238068	N	N	0	1	0	1
YHL015W	10.2292	2.96822	6.59873	7.8761	6.20711	7.04161	17.0218	15.551	16.2864	-0.0282112	0.923229	-0.392364	0.233521	N	N	2	1	3	6
YHL027W	19.0946	17.0673	18.0809	10.2389	11.5275	10.8832	11.5505	15.0148	13.2826	0.220464	0.038914	0.133937	0.101129	N	N	0	1	2	3
YHL030W	12.2751	12.986	12.6305	3.93805	5.91154	4.92479	7.599	6.97114	7.28507	0.409033	0.0552864	0.238988	0.0185699	N	N	0	0	2	2
YHL036W	4.77365	2.22616	3.49991	7.08849	1.77346	4.43098	6.0792	3.75369	4.91645	-0.102443	0.791829	-0.147595	0.632812	N	N	0	2	0	2
YHL039W	1.3639	1.11308	1.23849	1.57522	1.77346	1.67434	2.12772	2.14497	2.13634	-0.130951	0.118702	-0.236778	0.0876112	N	N	0	0	1	1
YHL048W	1.3639	2.59719	1.98055	1.57522	1.77346	1.67434	3.64752	3.21745	3.43249	0.0729411	0.70657	-0.238824	0.265962	N	N	0	1	0	1
YHR005C-A	1.3639	0.742055	1.05298	0.78761	0.88673	0.83717	0.60792	3.75369	2.18081	0.0996052	0.612921	-0.316198	0.215487	N	N	0	1	0	1
YHR007C	66.8311	50.8307	58.8309	43.3185	36.3559	39.8372	95.1395	105.64	100.39	0.169316	0.217378	-0.232083	0.0884929	N	N	1	0	0	1
YHR009C	8.1834	7.79157	7.98748	5.51327	5.32038	5.41683	6.68712	9.65235	8.16974	0.168665	0.0202138	-0.00979806	0.42178	N	N	0	1	1	2
YHR010W	8.86534	6.30747	7.58641	5.51327	6.20711	5.86019	18.2376	16.6235	17.4306	0.112124	0.395468	-0.361275	0.0641029	N	N	0	1	0	1
YHR016C	3.40975	4.45233	3.93104	2.36283	3.25134	2.80709	1.21584	2.14497	1.6804	0.146251	0.245569	0.369094	0.118729	N	N	0	1	0	1
YHR019C	17.7307	12.6149	15.1728	9.45132	12.7098	11.0806	15.8059	15.0148	15.4103	0.136504	0.329227	-0.00674643	0.990114	N	N	0	0	1	1
YHR020W	10.2292	7.79157	9.01041	7.8761	8.8673	8.3717	10.6386	17.1597	13.8992	0.0319308	0.695553	-0.188244	0.0941153	N	N	0	1	0	1
YHR025W	3.40975	1.85514	2.63244	3.93805	6.20711	5.07258	4.86336	3.21745	4.04041	-0.28487	0.234081	-0.186066	0.404784	N	N	0	1	0	1
YHR026W	3.40975	1.85514	2.63244	1.57522	1.47788	1.52655	4.5594	4.82618	4.69279	0.236647	0.389296	-0.251072	0.220872	N	N	1	0	1	2
YHR027C	19.0946	13.357	16.2258	3.15044	7.09384	5.12214	11.8544	19.3047	15.5796	0.500754	0.100136	0.0176502	0.761001	N	N	0	1	0	1
YHR036W	1.3639	0.742055	1.05298	1.57522	0.295577	0.935398	1.5198	0.536242	1.02802	0.0514223	0.8888	0.0104169	0.568214	N	N	0	0	1	1
YHR039C	14.3209	24.4878	19.4044	15.7522	13.301	14.5266	21.5812	23.0584	22.3198	0.125736	0.508765	-0.0607903	0.63464	N	N	0	0	1	1
YHR042W	40.235	35.9897	38.1123	22.8407	26.3063	24.5735	23.7089	40.2181	31.9635	0.190598	0.0417583	0.0764111	0.717774	N	N	0	0	1	1
YHR047C	4.77365	5.19438	4.98402	0.78761	2.66019	1.7239	3.0396	3.21745	3.12853	0.461067	0.163802	0.20224	0.0633989	N	N	0	2	1	3
YHR050W	3.40975	3.33925	3.3745	3.15044	3.25134	3.20089	4.86336	6.4349	5.64913	0.022938	0.120032	-0.223773	0.0908987	N	N	0	0	2	2
YHR051W	1.3639	0.742055	1.05298	0.78761	0.591154	0.689382	2.12772	1.60873	1.86822	0.183959	0.440346	-0.24901	0.238068	N	N	0	1	0	1
YHR056C	2.7278	1.11308	1.92044	1.57522	0.88673	1.23098	1.5198	1.60873	1.56426	0.193152	0.54624	0.089091	0.750322	N	N	0	0	1	1
YHR063C	2.04585	2.22616	2.13601	1.57522	1.18231	1.37876	3.95148	7.50739	5.72943	0.190113	0.117856	-0.428509	0.121606	N	N	0	1	0	1
YHR064C	5.4556	6.67849	6.06704	3.15044	5.32038	4.23541	13.3742	11.2611	12.3177	0.156082	0.30947	-0.307551	0.020466	N	N	0	0	1	1
YHR068W	7.50145	2.96822	5.23483	4.72566	3.25134	3.9885	8.20692	9.11611	8.66152	0.118093	0.680631	-0.218691	0.351333	N	N	1	0	1	2
YHR073W	26.596	22.2616	24.4288	8.66371	7.685	8.17435	10.0307	15.551	12.7908	0.475449	0.0721764	0.281003	0.0747129	N	N	0	1	0	1
YHR074W	10.2292	5.93644	8.08284	6.30088	3.54692	4.9239	5.16732	7.50739	6.33735	0.215255	0.359127	0.105656	0.684642	N	N	0	1	0	1
YHR086W	2.7278	1.48411	2.10595	2.36283	0.591154	1.47699	4.5594	4.82618	4.69279	0.154071	0.625771	-0.347982	0.143068	N	N	0	1	0	1
YHR087W	6.13755	2.22616	4.18186	1.57522	0.295577	0.935398	0.91188	4.28994	2.60091	0.650372	0.326813	0.206244	0.775417	N	N	0	1	0	1
YHR092C	7.50145	2.59719	5.04932	5.51327	3.25134	4.38231	4.86336	5.36242	5.11289	0.06153	0.836073	-0.00543367	0.951214	N	N	0	0	1	1
YHR094C	31.3697	22.6327	27.0012	19.6902	13.301	16.4956	19.1495	27.3483	23.2489	0.214015	0.203299	0.0649801	0.769463	N	N	0	0	1	1
YHR098C	10.2292	11.5018	10.8655	12.6018	7.38942	9.99559	11.5505	14.4785	13.0145	0.0362432	0.795818	-0.0783761	0.0993519	N	N	0	0	1	1
YHR102W	15.0029	7.79157	11.3972	4.72566	5.32038	5.02302	3.34356	9.65235	6.49796	0.355834	0.326139	0.244023	0.520435	N	N	1	0	0	1
YHR103W	9.54729	4.0813	6.8143	7.8761	1.18231	4.5292	2.73564	4.28994	3.51279	0.177399	0.65159	0.287769	0.477462	N	N	0	1	0	1
YHR104W	10.9112	5.56541	8.2383	3.93805	6.20711	5.07258	4.5594	4.82618	4.69279	0.210609	0.432791	0.244407	0.416966	N	N	0	1	0	1
YHR109W	0.68195	1.48411	1.08303	0.78761	0.88673	0.83717	0.60792	2.14497	1.37644	0.111827	0.649608	-0.104118	0.346976	N	N	1	0	0	1
YHR114W	4.0917	1.48411	2.7879	2.36283	0.591154	1.47699	2.43168	3.21745	2.82457	0.2759	0.503122	-0.00567397	0.887631	N	N	0	0	1	1
YHR123W	4.77365	2.22616	3.49991	3.93805	0.88673	2.41239	4.86336	3.75369	4.30853	0.161609	0.640681	-0.0902725	0.74895	N	N	0	0	1	1
YHR127W	0.68195	1.11308	0.897516	0.78761	0.295577	0.541593	0.60792	1.60873	1.10832	0.219369	0.391861	-0.0916242	0.300016	N	N	1	0	0	1
YHR132C	5.4556	2.96822	4.21191	2.36283	2.36461	2.36372	6.68712	2.14497	4.41604	0.250882	0.377084	-0.0205546	0.636192	N	N	0	0	1	1
YHR135C	9.54729	10.0177	9.78252	6.30088	4.43365	5.36727	4.86336	5.89866	5.38101	0.260698	0.115605	0.259587	0.00728884	N	N	0	1	1	2
YHR137W	2.04585	1.11308	1.57947	0.78761	0.295577	0.541593	0.91188	0.536242	0.724061	0.464837	0.226814	0.338735	0.280946	N	N	0	1	0	1
YHR143W	13.639	5.19438	9.41669	5.51327	2.06904	3.79115	10.9426	8.57987	9.76122	0.395127	0.392715	-0.0156058	0.963016	N	N	2	1	4	7
YHR147C	0.68195	1.48411	1.08303	0.78761	0.591154	0.689382	0.91188	2.68121	1.79654	0.196181	0.501211	-0.219798	0.19374	N	N	1	0	0	1
YHR163W	2.04585	2.96822	2.50703	4.72566	2.06904	3.39735	4.5594	6.4349	5.49715	-0.13198	0.623343	-0.340978	0.0343219	N	N	0	0	1	1
YHR168W	0.68195	1.85514	1.26854	0.78761	0.88673	0.83717	0.60792	2.68121	1.64456	0.180492	0.596007	-0.112746	0.373094	N	N	0	1	0	1
YHR170W	2.7278	4.45233	3.59006	6.30088	3.54692	4.9239	5.16732	8.04363	6.60547	-0.137207	0.511753	-0.264802	0.0832283	N	N	1	0	1	2
YHR174W	156.848	93.1279	124.988	74.8229	83.0571	78.94	121.584	158.728	140.156	0.199572	0.382249	-0.0497423	0.580708	N	N	2	1	1	4
YHR180W-A	0.68195	0.371027	0.526488	0.78761	0.295577	0.541593	0.30396	0.536242	0.420101	-0.0122844	0.964075	0.0980352	0.811182	N	N	1	1	1	3
YHR181W	2.7278	0.371027	1.54941	0.78761	0.591154	0.689382	0.91188	1.07248	0.992182	0.351707	0.598322	0.193576	0.736757	N	N	0	0	1	1
YHR188C	1.3639	5.19438	3.27914	3.15044	4.13807	3.64426	4.5594	11.2611	7.91024	-0.0458489	0.881006	-0.38243	0.133649	N	N	0	0	1	1
YHR190W	13.639	11.8729	12.7559	5.51327	10.9363	8.2248	16.4138	16.0873	16.2506	0.190587	0.324932	-0.105156	0.158565	N	N	1	1	0	2
YHR198C	2.04585	1.11308	1.57947	1.57522	0.591154	1.08319	1.5198	2.68121	2.1005	0.163807	0.540497	-0.123814	0.300023	N	N	0	1	0	1
YHR203C	10.2292	7.79157	9.01041	7.08849	10.3452	8.71684	13.6782	19.3047	16.4915	0.0143856	0.899389	-0.262514	0.0428048	N	N	0	1	0	1
YHR208W	44.3267	49.3466	46.8367	44.8938	49.3613	47.1275	67.1752	81.5088	74.342	-0.00268867	0.938997	-0.200648	0.0256271	N	N	0	1	0	1
YHR211W	6.13755	4.0813	5.10942	4.72566	1.47788	3.10177	0.91188	4.82618	2.86903	0.216762	0.422493	0.250637	0.467999	N	N	0	0	1	1
YIL002C	7.50145	7.04952	7.27548	3.93805	3.54692	3.74249	3.95148	6.4349	5.19319	0.288702	0.00762255	0.146427	0.227137	N	N	0	0	2	2
YIL005W	4.0917	4.82336	4.45753	3.93805	4.13807	4.03806	4.25544	5.89866	5.07705	0.042921	0.448669	-0.0565176	0.203619	N	N	0	0	1	1
YIL013C	73.6506	59.7354	66.693	24.4159	29.5577	26.9868	22.1891	32.1745	27.1818	0.392929	0.08014	0.389802	0.0886734	N	N	0	0	1	1
YIL014W	3.40975	2.22616	2.81796	0.78761	1.47788	1.13275	2.73564	2.14497	2.4403	0.395801	0.162631	0.0624903	0.534138	N	N	0	1	0	1
YIL017C	3.40975	2.59719	3.00347	1.57522	1.18231	1.37876	1.82376	2.14497	1.98436	0.338134	0.109579	0.180002	0.249848	N	N	0	1	1	2
YIL018W	11.5931	8.1626	9.87787	11.0265	11.2319	11.1292	28.5722	26.8121	27.6922	-0.0518016	0.598592	-0.447694	0.0493891	N	N	0	1	1	2
YIL027C	1.3639	0.371027	0.867463	0.78761	0.591154	0.689382	0.60792	2.14497	1.37644	0.0997913	0.781229	-0.200507	0.297953	N	N	0	1	0	1
YIL048W	7.50145	11.1308	9.31613	7.8761	5.0248	6.45045	7.29504	11.2611	9.27806	0.159646	0.346123	0.00177849	0.701229	N	N	1	1	0	2
YIL052C	6.8195	2.22616	4.52283	3.15044	6.50269	4.82656	10.6386	16.0873	13.3629	-0.0282278	0.92547	-0.470491	0.0852441	N	N	1	0	0	1
YIL053W	9.54729	8.53363	9.04046	5.51327	9.45846	7.48586	19.1495	24.1309	21.6402	0.0819488	0.572531	-0.37907	0.031843	N	N	0	1	1	2
YIL056W	8.86534	12.986	10.9257	7.8761	4.43365	6.15488	8.81484	6.4349	7.62487	0.249228	0.221499	0.156215	0.292446	N	N	0	1	1	2
YIL066C	6.13755	4.45233	5.29494	0.78761	2.36461	1.57611	2.12772	3.75369	2.94071	0.526274	0.0847827	0.255409	0.219871	N	N	0	0	1	1
YIL069C	3.40975	2.59719	3.00347	3.93805	5.61596	4.777	12.4624	13.406	12.9342	-0.201532	0.243744	-0.634116	0.00569062	N	N	1	1	0	2
YIL075C	17.7307	17.4383	17.5845	11.0265	8.57173	9.79913	15.198	19.3047	17.2514	0.253942	0.0956395	0.0083065	0.621174	N	N	0	1	0	1
YIL076W	4.0917	2.22616	3.15893	3.15044	1.77346	2.46195	4.25544	7.50739	5.88141	0.108261	0.613365	-0.269942	0.105965	N	N	0	3	0	3
YIL078W	11.5931	14.099	12.8461	4.72566	5.61596	5.17081	13.0703	14.4785	13.7744	0.395213	0.0751035	-0.0303019	0.486757	N	N	0	1	1	2
YIL079C	0.68195	0.371027	0.526488	1.57522	1.77346	1.67434	0.60792	3.75369	2.18081	-0.502455	0.0364023	-0.617228	0.187294	N	N	0	0	1	1
YIL083C	3.40975	2.96822	3.18898	2.36283	2.06904	2.21593	7.90296	7.50739	7.70517	0.158096	0.082188	-0.38313	0.0127818	N	N	1	0	0	1
YIL096C	0.68195	1.11308	0.897516	1.57522	0.591154	1.08319	2.12772	1.07248	1.6001	-0.0816612	0.775186	-0.251106	0.33099	N	N	0	1	0	1
YIL101C	4.77365	0.371027	2.57234	1.57522	1.18231	1.37876	1.5198	1.60873	1.56426	0.270838	0.68362	0.216018	0.731945	N	N	0	1	0	1
YIL107C	3.40975	3.71027	3.56001	3.93805	2.06904	3.00354	4.86336	9.11611	6.98974	0.0738174	0.657709	-0.293009	0.141984	N	N	0	1	0	1
YIL115C	25.9141	20.4065	23.1603	6.30088	6.20711	6.254	7.599	11.2611	9.43004	0.568587	0.10271	0.390231	0.107589	N	N	0	0	1	1
YIL119C	3.40975	1.48411	2.44693	1.57522	2.06904	1.82213	1.21584	3.75369	2.48477	0.128042	0.632604	-0.00666431	0.626714	N	N	0	1	0	1
YIL123W	12.2751	10.0177	11.1464	3.93805	5.0248	4.48143	4.25544	12.8698	8.56262	0.395719	0.0644645	0.114528	0.880333	N	N	0	1	1	2
YIL125W	17.7307	25.2299	21.4803	11.8141	13.8921	12.8531	10.9426	15.551	13.2468	0.223031	0.242589	0.209929	0.291001	N	N	0	1	3	4
YIL133C	6.13755	5.19438	5.66596	7.08849	6.20711	6.6478	13.3742	12.3336	12.8539	-0.0694041	0.268159	-0.355761	0.0144434	N	N	0	1	0	1
YIL136W	8.86534	3.33925	6.1023	2.36283	2.66019	2.51151	1.82376	3.75369	2.78873	0.385558	0.41705	0.340087	0.489243	N	N	0	1	0	1
YIL137C	6.13755	4.82336	5.48045	4.72566	2.66019	3.69293	4.25544	4.28994	4.27269	0.171446	0.302125	0.108115	0.319086	N	N	0	1	0	1
YIL139C	0.68195	0.371027	0.526488	0.78761	1.18231	0.984958	0.60792	0.536242	0.572081	-0.272029	0.216433	-0.0360687	0.888	N	N	0	1	0	1
YIL140W	2.04585	1.85514	1.95049	0.78761	1.18231	0.984958	2.12772	2.14497	2.13634	0.296726	0.0833886	-0.0395268	0.295374	N	N	0	1	0	1
YIL142W	6.8195	5.19438	6.00694	4.72566	1.77346	3.24956	4.5594	3.75369	4.15655	0.266829	0.277055	0.159921	0.224171	N	N	0	1	0	1
YIL145C	4.0917	1.48411	2.7879	1.57522	2.66019	2.11771	4.5594	2.68121	3.62031	0.119412	0.700987	-0.113467	0.829841	N	N	0	0	1	1
YIL148W	6.8195	5.19438	6.00694	8.66371	10.0496	9.35666	17.3257	24.1309	20.7283	-0.192468	0.0911722	-0.537911	0.0325576	N	N	0	1	0	1
YIL155C	4.0917	1.11308	2.60239	2.36283	1.47788	1.92036	1.21584	1.60873	1.41228	0.13199	0.727702	0.265451	0.597057	N	N	0	1	0	1
YIL156W	3.40975	5.93644	4.67309	2.36283	1.47788	1.92036	3.34356	2.14497	2.74426	0.386222	0.248077	0.231179	0.316671	N	N	0	0	1	1
YIR010W	1.3639	0.742055	1.05298	0.78761	0.88673	0.83717	0.91188	2.14497	1.52842	0.0996052	0.612921	-0.161825	0.215358	N	N	0	1	0	1
YIR014W	0.68195	0.371027	0.526488	0.78761	0.88673	0.83717	0.60792	0.536242	0.572081	-0.201425	0.274277	-0.0360687	0.888	N	N	0	1	0	1
YIR018W	1.3639	1.48411	1.424	0.78761	0.88673	0.83717	0.30396	3.21745	1.76071	0.230698	0.0189463	-0.0921755	0.380551	N	N	0	0	1	1
YIR020C	0.68195	0.371027	0.526488	0.78761	0.295577	0.541593	0.30396	0.536242	0.420101	-0.0122844	0.964075	0.0980352	0.811182	N	N	0	1	0	1
YIR023W	6.13755	4.45233	5.29494	2.36283	2.06904	2.21593	2.73564	5.89866	4.31715	0.378304	0.16113	0.0886636	0.886346	N	N	0	1	1	2
YIR034C	2.04585	2.22616	2.13601	5.51327	0.88673	3.2	3.64752	5.89866	4.77309	-0.175547	0.725553	-0.349197	0.103704	N	N	0	1	0	1
YIR037W	3.40975	1.11308	2.26142	3.93805	1.18231	2.56018	2.12772	4.82618	3.47695	-0.0538899	0.883467	-0.186818	0.318067	N	N	0	0	1	1
YJL001W	2.04585	1.48411	1.76498	0.78761	2.06904	1.42832	3.0396	3.21745	3.12853	0.091913	0.695909	-0.2486	0.118161	N	N	0	1	0	1
YJL002C	3.40975	4.45233	3.93104	3.15044	3.54692	3.34868	1.82376	4.28994	3.05685	0.0696336	0.45386	0.109233	0.780624	N	N	0	1	1	2
YJL011C	0.68195	0.371027	0.526488	0.78761	0.591154	0.689382	0.30396	1.07248	0.688222	-0.117071	0.483583	-0.11634	0.29357	N	N	0	1	0	1
YJL016W	21.1404	12.986	17.0632	11.0265	11.5275	11.277	9.42276	13.9423	11.6825	0.179866	0.39008	0.164524	0.48019	N	N	0	1	0	1
YJL020C	21.1404	19.2934	20.2169	4.72566	11.5275	8.12658	7.599	12.8698	10.2344	0.395808	0.154666	0.295653	0.0413918	N	N	0	0	1	1
YJL026W	11.5931	7.79157	9.69236	13.3894	14.4833	13.9363	21.8851	33.247	27.5661	-0.157718	0.248781	-0.453945	0.0357634	N	N	0	1	0	1
YJL033W	8.1834	4.0813	6.13235	3.93805	2.66019	3.29912	4.86336	2.14497	3.50416	0.269229	0.385568	0.243042	0.33529	N	N	0	1	0	1
YJL034W	23.1863	23.3747	23.2805	11.0265	14.4833	12.7549	14.894	19.841	17.3675	0.261315	0.102763	0.127255	0.16281	N	N	1	2	1	4
YJL039C	12.2751	17.0673	14.6712	7.08849	7.09384	7.09117	6.0792	10.7248	8.40202	0.315747	0.194911	0.242081	0.241396	N	N	0	1	0	1
YJL047C-A	0.68195	0.371027	0.526488	0.78761	0.295577	0.541593	0.30396	0.536242	0.420101	-0.0122844	0.964075	0.0980352	0.811182	N	N	0	1	1	2
YJL052W	49.1004	25.9719	37.5361	43.3185	33.1046	38.2116	73.8623	78.2913	76.0768	-0.00774525	0.964085	-0.306803	0.177873	N	N	1	3	0	4
YJL058C	3.40975	1.11308	2.26142	1.57522	0.88673	1.23098	1.21584	1.60873	1.41228	0.264131	0.529675	0.204459	0.631107	N	N	0	1	0	1
YJL060W	4.77365	2.59719	3.68542	4.72566	2.95577	3.84071	6.38316	10.1886	8.28588	-0.017925	0.922321	-0.351852	0.0633376	N	N	0	1	0	1
YJL065C	0.68195	0.371027	0.526488	2.36283	0.88673	1.62478	0.30396	1.07248	0.688222	-0.489406	0.368813	-0.11634	0.29357	N	N	1	0	0	1
YJL079C	84.5618	85.3363	84.949	57.4955	71.8252	64.6603	79.6375	89.5524	84.595	0.11852	0.215236	0.00181387	0.54727	N	N	0	2	1	3
YJL080C	47.0545	33.0214	40.038	14.177	16.5523	15.3646	21.8851	24.6671	23.2761	0.41595	0.167948	0.235561	0.25943	N	N	1	1	0	2
YJL091C	4.0917	1.48411	2.7879	1.57522	0.591154	1.08319	0.91188	1.60873	1.2603	0.410574	0.400265	0.344803	0.486214	N	N	0	2	0	2
YJL093C	3.40975	2.22616	2.81796	3.15044	1.18231	2.16637	1.82376	3.75369	2.78873	0.114201	0.63832	0.00452825	0.615092	N	N	0	3	0	3
YJL095W	22.5043	15.9542	19.2293	3.93805	4.72923	4.33364	5.16732	6.97114	6.06923	0.64711	0.133433	0.500829	0.154875	N	N	0	1	0	1
YJL101C	15.6848	8.90466	12.2947	7.8761	9.45846	8.66728	5.16732	9.65235	7.40984	0.151837	0.473087	0.219911	0.457333	N	N	0	0	1	1
YJL109C	46.3726	29.6822	38.0274	18.9026	14.7788	16.8407	20.3653	18.2322	19.2988	0.353735	0.223058	0.294567	0.259132	N	N	0	1	2	3
YJL110C	4.0917	1.85514	2.97342	2.36283	0.591154	1.47699	2.73564	2.68121	2.70843	0.303878	0.40915	0.040539	0.844563	N	N	0	1	0	1
YJL111W	9.54729	4.82336	7.18533	3.93805	1.18231	2.56018	4.25544	6.97114	5.61329	0.448176	0.261835	0.107229	0.771206	N	N	0	2	0	2
YJL122W	0.68195	1.48411	1.08303	0.78761	0.88673	0.83717	0.91188	1.07248	0.992182	0.111827	0.649608	0.038049	0.920042	N	N	1	0	0	1
YJL133C-A	2.04585	1.11308	1.57947	1.57522	1.47788	1.52655	0.91188	1.07248	0.992182	0.0147986	0.928166	0.201919	0.448354	N	N	0	1	0	1
YJL134W	2.04585	0.742055	1.39395	0.78761	0.591154	0.689382	1.82376	2.68121	2.25248	0.305788	0.472711	-0.208414	0.329284	N	N	0	1	0	1
YJL136C	4.77365	3.33925	4.05645	3.15044	4.13807	3.64426	5.77524	9.11611	7.44568	0.0465368	0.687729	-0.263758	0.0639356	N	N	0	1	0	1
YJL138C	9.54729	8.90466	9.22598	7.8761	5.32038	6.59824	15.8059	23.0584	19.4322	0.145584	0.273556	-0.323509	0.0870988	N	N	0	1	1	2
YJL140W	3.40975	4.0813	3.74552	0.78761	0.88673	0.83717	3.34356	4.82618	4.08487	0.650699	0.0679381	-0.0376655	0.292666	N	N	0	0	1	1
YJL146W	0.68195	0.742055	0.712002	2.36283	0.88673	1.62478	0.91188	0.536242	0.724061	-0.358313	0.432612	-0.00729386	0.539081	N	N	0	0	1	1
YJL147C	1.3639	1.11308	1.23849	0.78761	0.88673	0.83717	0.91188	1.60873	1.2603	0.170079	0.157194	-0.00758222	0.465744	N	N	0	1	0	1
YJL153C	6.13755	8.53363	7.33559	7.08849	1.47788	4.28319	1.5198	2.14497	1.83238	0.233668	0.462386	0.602418	0.135265	N	N	0	3	0	3
YJL154C	8.86534	7.42055	8.14295	9.45132	5.61596	7.53364	9.42276	9.65235	9.53756	0.0337768	0.80725	-0.0686556	0.292277	N	N	0	2	0	2
YJL156C	3.40975	2.59719	3.00347	1.57522	2.66019	2.11771	2.43168	4.28994	3.36081	0.151758	0.329937	-0.0488204	0.316414	N	N	1	0	0	1
YJL159W	140.482	87.5625	114.022	91.3628	101.974	96.6684	103.346	148.539	125.943	0.0717044	0.629597	-0.0431842	0.537006	N	N	2	2	2	6
YJL176C	5.4556	3.71027	4.58294	2.36283	2.06904	2.21593	2.73564	2.14497	2.4403	0.315587	0.216849	0.2737	0.223743	N	N	0	1	0	1
YJL177W	4.77365	3.33925	4.05645	3.93805	2.66019	3.29912	10.9426	7.50739	9.22497	0.0897476	0.513992	-0.356819	0.0643822	N	N	0	1	0	1
YJL186W	3.40975	6.30747	4.85861	2.36283	2.06904	2.21593	3.34356	3.21745	3.28051	0.340955	0.316826	0.170571	0.466506	N	N	0	0	2	2
YJL189W	2.7278	0.742055	1.73493	2.36283	1.47788	1.92036	3.64752	4.28994	3.96873	-0.0441008	0.8861	-0.35937	0.243115	N	N	0	2	0	2
YJL190C	2.7278	1.11308	1.92044	4.72566	4.13807	4.43187	7.599	7.50739	7.55319	-0.363186	0.166523	-0.59473	0.0907749	N	N	1	1	1	3
YJL193W	1.3639	1.11308	1.23849	0.78761	0.591154	0.689382	0.91188	2.14497	1.52842	0.254433	0.0809298	-0.0913511	0.27405	N	N	0	1	0	1
YJL197W	4.77365	4.45233	4.61299	2.36283	2.95577	2.6593	5.47128	6.97114	6.22121	0.239215	0.0500669	-0.129893	0.0809152	N	N	0	1	0	1
YJL206C	4.77365	0.742055	2.75785	1.57522	1.47788	1.52655	1.5198	1.60873	1.56426	0.256859	0.650902	0.246261	0.664882	N	N	0	0	1	1
YJR001W	4.0917	2.22616	3.15893	3.15044	1.47788	2.31416	2.12772	5.89866	4.01319	0.135146	0.570319	-0.10395	0.308185	N	N	0	0	1	1
YJR002W	5.4556	5.19438	5.32499	2.36283	3.25134	2.80709	3.0396	4.28994	3.66477	0.278063	0.0899498	0.162272	0.106666	N	N	0	0	1	1
YJR009C	45.0087	29.6822	37.3454	31.5044	28.0798	29.7921	45.29	63.2765	54.2833	0.0981364	0.500429	-0.162429	0.166439	N	N	0	2	3	5
YJR010C-A	0.68195	0.371027	0.526488	0.78761	0.591154	0.689382	0.91188	2.68121	1.79654	-0.117071	0.483583	-0.533049	0.130668	N	N	1	0	0	1
YJR016C	72.2867	83.1101	77.6984	48.0442	70.3473	59.1957	80.5494	94.9148	87.7321	0.118122	0.316823	-0.0527466	0.189715	N	N	0	1	1	2
YJR034W	0.68195	0.371027	0.526488	0.78761	0.591154	0.689382	0.60792	1.07248	0.840202	-0.117071	0.483583	-0.202995	0.16725	N	N	0	1	0	1
YJR040W	6.13755	8.53363	7.33559	1.57522	3.54692	2.56107	5.47128	4.28994	4.88061	0.457013	0.0955652	0.176961	0.246472	N	N	0	1	0	1
YJR041C	4.0917	2.22616	3.15893	1.57522	2.36461	1.96992	5.77524	4.82618	5.30071	0.205092	0.407355	-0.224794	0.275121	N	N	0	1	1	2
YJR044C	0.68195	2.59719	1.63957	1.57522	0.88673	1.23098	3.0396	2.68121	2.86041	0.124481	0.745711	-0.241697	0.445981	N	N	0	1	0	1
YJR045C	54.556	34.1345	44.3452	25.2035	26.8975	26.0505	31.6118	49.3343	40.4731	0.231031	0.322455	0.0396811	0.966318	N	N	1	2	1	4
YJR073C	7.50145	2.22616	4.8638	3.93805	2.66019	3.29912	3.95148	4.82618	4.38883	0.168578	0.658713	0.0446275	0.938379	N	N	0	3	0	3
YJR074W	1.3639	0.742055	1.05298	1.57522	0.88673	1.23098	0.60792	1.60873	1.10832	-0.0678304	0.738471	-0.0222474	0.527073	N	N	0	1	0	1
YJR075W	2.04585	2.59719	2.32152	2.36283	2.66019	2.51151	3.64752	2.68121	3.16437	-0.0341625	0.621428	-0.134514	0.244728	N	N	0	1	0	1
YJR077C	2.04585	1.48411	1.76498	2.36283	2.06904	2.21593	3.34356	2.68121	3.01239	-0.0988172	0.326584	-0.232171	0.105677	N	N	1	0	0	1
YJR080C	0.68195	1.48411	1.08303	2.36283	0.591154	1.47699	0.60792	1.60873	1.10832	-0.134738	0.73882	-0.010026	0.628719	N	N	0	1	0	1
YJR090C	5.4556	7.79157	6.62359	2.36283	2.95577	2.6593	6.99108	6.4349	6.71299	0.396326	0.16474	-0.00582297	0.973006	N	N	0	0	1	1
YJR091C	16.3668	10.3888	13.3778	5.51327	6.79827	6.15577	6.68712	15.0148	10.8509	0.337102	0.237723	0.0909163	0.915122	N	N	0	0	1	1
YJR104C	15.6848	5.56541	10.6251	11.0265	7.98057	9.50356	10.9426	12.3336	11.6381	0.0484479	0.862618	-0.0395466	0.83281	N	N	0	1	0	1
YJR109C	63.4213	59.7354	61.5784	44.1062	33.9913	39.0487	55.0168	55.2329	55.1248	0.197821	0.109076	0.0480808	0.17824	N	N	1	1	0	2
YJR111C	3.40975	2.22616	2.81796	3.15044	1.77346	2.46195	5.16732	4.82618	4.99675	0.058655	0.733554	-0.248753	0.169173	N	N	0	0	1	1
YJR117W	2.7278	3.71027	3.21904	3.15044	1.18231	2.16637	2.73564	5.36242	4.04903	0.171993	0.469081	-0.0996251	0.22149	N	N	0	1	0	1
YJR118C	0.68195	1.11308	0.897516	1.57522	0.591154	1.08319	1.5198	1.60873	1.56426	-0.0816612	0.775186	-0.241268	0.189822	N	N	1	0	0	1
YJR121W	23.8682	9.64671	16.7575	13.3894	11.8231	12.6062	20.0614	21.9859	21.0236	0.123624	0.663407	-0.0984994	0.625096	N	N	0	0	2	2
YJR123W	14.3209	15.5831	14.952	14.177	15.9611	15.0691	36.7792	22.5222	29.6507	-0.0033856	0.925442	-0.297334	0.188141	N	N	1	1	0	2
YJR127C	16.3668	10.7598	13.5633	7.08849	8.27615	7.68232	6.38316	6.4349	6.40903	0.246873	0.272273	0.325573	0.238146	N	N	0	1	0	1
YJR135W-A	0.68195	0.371027	0.526488	0.78761	0.591154	0.689382	2.73564	1.07248	1.90406	-0.117071	0.483583	-0.558292	0.230333	N	N	0	1	0	1
YJR139C	8.86534	3.33925	6.1023	7.8761	5.32038	6.59824	12.7663	19.841	16.3036	-0.0339349	0.89082	-0.426791	0.0856535	N	N	2	2	1	5
YJR140C	12.957	7.79157	10.3743	1.57522	3.8425	2.70886	4.5594	3.21745	3.88843	0.583173	0.166575	0.426185	0.225577	N	N	0	0	2	2
YJR141W	0.68195	0.742055	0.712002	1.57522	0.88673	1.23098	0.30396	0.536242	0.420101	-0.237768	0.371345	0.229128	0.105068	N	N	0	0	1	1
YJR144W	2.04585	0.742055	1.39395	0.78761	0.295577	0.541593	2.43168	2.14497	2.28832	0.410574	0.400265	-0.21527	0.424724	N	N	0	0	1	1
YJR145C	10.2292	5.56541	7.89733	5.51327	7.98057	6.74692	15.502	16.0873	15.7946	0.0683745	0.71673	-0.301029	0.178422	N	N	1	1	0	2
YJR147W	12.957	7.79157	10.3743	4.72566	3.54692	4.13629	3.34356	3.75369	3.54863	0.399348	0.236437	0.465899	0.233031	N	N	0	0	1	1
YJR148W	18.4126	12.6149	15.5138	7.8761	10.6408	9.25843	11.2465	17.1597	14.2031	0.22418	0.238621	0.0383337	0.964959	N	N	0	1	0	1
YKL006W	4.77365	4.45233	4.61299	3.93805	4.13807	4.03806	7.29504	5.89866	6.59685	0.0578093	0.115655	-0.155354	0.0910599	N	N	1	0	0	1
YKL008C	2.04585	2.22616	2.13601	4.72566	3.25134	3.9885	7.599	5.89866	6.74883	-0.271207	0.236861	-0.499626	0.0547521	N	N	0	0	1	1
YKL009W	0.68195	0.742055	0.712002	2.36283	2.36461	2.36372	3.64752	2.68121	3.16437	-0.521115	0.0115093	-0.647805	0.0656064	N	N	1	0	0	1
YKL013C	6.8195	1.48411	4.1518	1.57522	1.47788	1.52655	1.82376	5.36242	3.59309	0.434525	0.505071	0.0627687	0.923809	N	N	1	0	0	1
YKL020C	8.86534	8.53363	8.69949	5.51327	3.54692	4.5301	6.68712	4.82618	5.75665	0.283386	0.139103	0.179324	0.0602268	N	N	0	1	0	1
YKL029C	27.9599	18.5514	23.2557	19.6902	14.1877	16.939	20.3653	16.6235	18.4944	0.137642	0.389626	0.099488	0.434203	N	N	0	0	1	1
YKL035W	21.8224	9.64671	15.7345	7.8761	7.98057	7.92834	9.1188	13.406	11.2624	0.297672	0.42165	0.145222	0.675477	N	N	0	3	1	4
YKL050C	4.77365	2.22616	3.49991	1.57522	0.591154	1.08319	1.21584	0.536242	0.876041	0.509353	0.282292	0.601532	0.267616	N	N	0	1	0	1
YKL051W	2.04585	2.59719	2.32152	1.57522	0.88673	1.23098	1.5198	1.07248	1.29614	0.275523	0.137852	0.25312	0.114293	N	N	1	1	0	2
YKL056C	8.86534	5.19438	7.02986	7.8761	11.8231	9.84958	29.1802	23.5946	26.3874	-0.146471	0.405751	-0.57445	0.0195009	N	N	0	0	1	1
YKL060C	100.247	64.1877	82.2172	69.3097	72.4163	70.863	131.615	156.583	144.099	0.064543	0.642028	-0.243697	0.135113	N	N	1	4	0	5
YKL062W	8.86534	4.45233	6.65884	6.30088	5.32038	5.81063	3.34356	6.97114	5.15735	0.0591751	0.76698	0.110972	0.836169	N	N	1	1	2	4
YKL067W	6.8195	4.45233	5.63591	5.51327	2.66019	4.08673	9.42276	4.28994	6.85635	0.139588	0.493801	-0.0851287	0.974602	N	N	0	2	0	2
YKL072W	2.7278	4.0813	3.40455	3.15044	2.36461	2.75753	2.73564	3.21745	2.97655	0.0915399	0.513067	0.0583471	0.728606	N	N	1	0	0	1
YKL077W	4.0917	3.33925	3.71547	3.15044	2.95577	3.0531	5.16732	3.21745	4.19239	0.0852724	0.315359	-0.0524473	0.98797	N	N	1	0	0	1
YKL080W	8.1834	5.56541	6.8744	5.51327	4.43365	4.97346	12.1584	10.1886	11.1735	0.140576	0.363635	-0.210954	0.178257	N	N	0	2	0	2
YKL081W	6.13755	8.1626	7.15007	7.08849	4.72923	5.90886	6.99108	4.28994	5.64051	0.0828069	0.510029	0.102992	0.232672	N	N	0	2	3	5
YKL088W	2.7278	2.59719	2.66249	3.15044	1.77346	2.46195	1.82376	2.14497	1.98436	0.0340095	0.819664	0.127667	0.0314711	N	N	0	1	0	1
YKL096W-A	10.2292	1.11308	5.67116	1.57522	2.66019	2.11771	3.95148	2.68121	3.31635	0.427807	0.577705	0.233012	0.662326	N	N	3	4	1	8
YKL100C	2.7278	2.22616	2.47698	1.57522	2.66019	2.11771	3.34356	5.36242	4.35299	0.0680572	0.629967	-0.244865	0.0862263	N	N	0	1	0	1
YKL101W	15.6848	7.79157	11.7382	2.36283	2.66019	2.51151	3.64752	4.28994	3.96873	0.669667	0.256914	0.47095	0.304195	N	N	0	0	2	2
YKL104C	6.13755	4.82336	5.48045	3.93805	3.25134	3.5947	3.95148	5.89866	4.92507	0.183154	0.165219	0.0464038	0.941367	N	N	0	2	0	2
YKL105C	7.50145	9.64671	8.57408	2.36283	3.54692	2.95488	3.0396	4.82618	3.93289	0.462648	0.0694535	0.338476	0.120773	N	N	0	0	1	1
YKL110C	2.7278	2.22616	2.47698	2.36283	1.18231	1.77257	2.73564	3.21745	2.97655	0.14532	0.430146	-0.0797899	0.203163	N	N	0	0	1	1
YKL117W	2.04585	1.48411	1.76498	0.78761	1.77346	1.28054	2.73564	3.75369	3.24467	0.139348	0.502491	-0.264431	0.0454091	N	N	0	2	0	2
YKL125W	2.04585	2.59719	2.32152	0.78761	1.77346	1.28054	2.73564	2.68121	2.70843	0.258381	0.239971	-0.0669444	0.404516	N	N	0	1	1	2
YKL128C	1.3639	2.59719	1.98055	0.78761	1.77346	1.28054	3.0396	2.14497	2.59228	0.189393	0.47266	-0.116898	0.642589	N	N	0	1	0	1
YKL130C	1.3639	0.742055	1.05298	0.78761	1.47788	1.13275	1.21584	1.07248	1.14416	-0.031714	0.879612	-0.0360687	0.888	N	N	1	0	0	1
YKL139W	0.68195	0.742055	0.712002	0.78761	1.77346	1.28054	1.5198	1.07248	1.29614	-0.25491	0.454221	-0.260171	0.128608	N	N	0	1	0	1
YKL141W	1.3639	1.48411	1.424	1.57522	1.18231	1.37876	3.95148	3.21745	3.58447	0.0140215	0.857493	-0.400913	0.0399273	N	N	2	1	0	3
YKL142W	4.0917	1.85514	2.97342	6.30088	1.77346	4.03717	7.29504	8.04363	7.66933	-0.132821	0.727189	-0.411502	0.135151	N	N	0	0	1	1
YKL145W	12.2751	15.5831	13.9291	10.2389	6.79827	8.5186	7.29504	10.1886	8.74182	0.213556	0.151734	0.202322	0.186954	N	N	0	1	0	1
YKL146W	4.0917	2.59719	3.34444	3.15044	1.77346	2.46195	3.64752	5.36242	4.50497	0.133045	0.477194	-0.129368	0.237462	N	N	0	1	0	1
YKL150W	3.40975	1.11308	2.26142	2.36283	2.06904	2.21593	4.5594	6.4349	5.49715	0.00882355	0.974848	-0.385757	0.154054	N	N	0	1	0	1
YKL152C	41.5989	22.2616	31.9303	25.2035	25.124	25.1638	44.3782	58.9866	51.6824	0.103427	0.611267	-0.20914	0.218801	N	N	1	1	1	3
YKL154W	0.68195	0.742055	0.712002	0.78761	0.295577	0.541593	0.60792	0.536242	0.572081	0.118808	0.613827	0.0950238	0.0658286	N	N	0	1	0	1
YKL156W	1.3639	2.22616	1.79503	3.93805	1.47788	2.70797	5.47128	3.75369	4.61249	-0.178571	0.5915	-0.409863	0.0592184	N	N	1	0	0	1
YKL157W	16.3668	12.986	14.6764	7.8761	10.3452	9.11064	18.2376	18.7685	18.503	0.20707	0.128302	-0.100624	0.255157	N	N	0	2	1	3
YKL160W	2.7278	1.85514	2.29147	0.78761	1.18231	0.984958	2.73564	3.21745	2.97655	0.366696	0.163285	-0.113599	0.300335	N	N	0	1	0	1
YKL164C	8.1834	3.71027	5.94683	1.57522	3.54692	2.56107	5.77524	4.82618	5.30071	0.365864	0.348624	0.0499519	0.760605	N	N	1	0	0	1
YKL165C	3.40975	2.22616	2.81796	3.15044	2.36461	2.75753	3.95148	5.36242	4.65695	0.00941447	0.940969	-0.218167	0.111479	N	N	0	1	0	1
YKL173W	7.50145	4.45233	5.97689	5.51327	2.06904	3.79115	4.5594	5.89866	5.22903	0.197704	0.443512	0.0580538	0.832296	N	N	0	0	1	1
YKL180W	8.1834	4.0813	6.13235	5.51327	4.72923	5.12125	13.0703	11.7973	12.4338	0.0782509	0.708484	-0.306977	0.203248	N	N	0	3	2	5
YKL184W	6.8195	5.56541	6.19245	5.51327	4.13807	4.82567	4.25544	3.75369	4.00457	0.108305	0.280641	0.189307	0.156977	N	N	0	0	1	1
YKL185W	5.4556	5.56541	5.5105	4.72566	3.54692	4.13629	4.86336	8.57987	6.72162	0.12458	0.255512	-0.0862824	0.259766	N	N	0	1	0	1
YKL198C	17.0487	11.1308	14.0898	7.08849	2.95577	5.02213	7.599	5.89866	6.74883	0.448016	0.143109	0.319676	0.225881	N	N	1	0	0	1
YKL203C	48.4184	40.442	44.4302	13.3894	12.1186	12.754	8.51088	11.7973	10.1541	0.542032	0.0734548	0.641037	0.0656641	N	N	1	1	0	2
YKL204W	3.40975	5.19438	4.30207	4.72566	3.54692	4.13629	2.43168	3.21745	2.82457	0.017066	0.89294	0.182725	0.379214	N	N	0	0	1	1
YKL205W	4.0917	1.48411	2.7879	2.36283	1.47788	1.92036	4.5594	6.4349	5.49715	0.161896	0.625472	-0.29486	0.219215	N	N	0	1	0	1
YKL209C	6.13755	2.22616	4.18186	1.57522	0.88673	1.23098	0.91188	3.21745	2.06467	0.53112	0.366816	0.306519	0.572313	N	N	0	2	0	2
YKL210W	19.0946	18.1803	18.6375	9.45132	12.1186	10.785	14.894	21.4497	18.1719	0.237567	0.0803058	0.0109875	0.602689	N	N	1	0	1	2
YKL211C	2.7278	2.22616	2.47698	3.93805	2.06904	3.00354	5.47128	8.04363	6.75745	-0.0837112	0.673279	-0.43586	0.0535471	N	N	1	0	0	1
YKL212W	10.9112	10.7598	10.8355	14.177	10.9363	12.5567	15.198	20.9134	18.0557	-0.0640254	0.480534	-0.221766	0.103427	N	N	0	1	0	1
YKL216W	4.77365	3.71027	4.24196	3.93805	3.25134	3.5947	12.7663	12.3336	12.5499	0.0719043	0.429154	-0.471075	0.0342144	N	N	1	0	1	2
YKL222C	3.40975	1.85514	2.63244	2.36283	1.47788	1.92036	1.82376	1.60873	1.71624	0.136977	0.527549	0.18578	0.429347	N	N	0	0	1	1
YKR013W	2.7278	1.85514	2.29147	0.78761	0.591154	0.689382	0.60792	3.21745	1.91269	0.521654	0.154971	0.0784701	0.764871	N	N	0	1	0	1
YKR043C	1.3639	4.0813	2.7226	2.36283	2.95577	2.6593	4.86336	2.14497	3.50416	0.0102167	0.970544	-0.109601	0.954448	N	N	0	1	0	1
YKR055W	0.68195	0.371027	0.526488	0.78761	1.18231	0.984958	2.43168	1.07248	1.75208	-0.272029	0.216433	-0.522166	0.192697	N	N	0	1	0	1
YKR057W	2.7278	3.33925	3.03352	2.36283	3.8425	3.10266	5.77524	4.82618	5.30071	-0.00978752	0.942311	-0.242387	0.0390693	N	N	0	0	1	1
YKR058W	3.40975	1.85514	2.63244	1.57522	1.18231	1.37876	0.60792	3.21745	1.91269	0.280869	0.341488	0.138715	0.953266	N	N	1	1	1	3
YKR063C	1.3639	1.48411	1.424	2.36283	1.47788	1.92036	1.21584	2.68121	1.94852	-0.129871	0.461218	-0.136195	0.241024	N	N	0	1	0	1
YKR064W	4.77365	3.33925	4.05645	2.36283	0.591154	1.47699	3.0396	1.60873	2.32416	0.438768	0.157417	0.241879	0.164087	N	N	1	0	0	1
YKR065C	0.68195	1.85514	1.26854	0.78761	2.06904	1.42832	1.82376	1.60873	1.71624	-0.0515213	0.871141	-0.131274	0.623238	N	N	0	1	0	1
YKR067W	4.0917	3.71027	3.90099	4.72566	3.25134	3.9885	3.34356	7.50739	5.42547	-0.00963546	0.925422	-0.143263	0.236303	N	N	0	0	1	1
YKR074W	1.3639	0.371027	0.867463	1.57522	1.18231	1.37876	0.60792	0.536242	0.572081	-0.201239	0.481704	0.180794	0.641564	N	N	0	1	0	1
YKR075C	4.77365	1.11308	2.94336	2.36283	1.18231	1.77257	2.43168	4.82618	3.62893	0.220241	0.637181	-0.0909344	0.609039	N	N	0	0	1	1
YKR082W	8.86534	4.0813	6.47332	2.36283	3.25134	2.80709	8.20692	5.89866	7.05279	0.362871	0.361521	-0.0372338	0.999365	N	N	0	2	0	2
YKR087C	0.68195	0.742055	0.712002	0.78761	0.591154	0.689382	1.21584	0.536242	0.876041	0.0140215	0.857493	-0.0900431	0.978134	N	N	0	0	1	1
YKR096W	8.86534	7.04952	7.95743	3.93805	3.8425	3.89027	6.0792	8.57987	7.32954	0.310793	0.138974	0.0356965	0.998274	N	N	0	1	0	1
YKR100C	2.7278	1.85514	2.29147	1.57522	1.47788	1.52655	1.21584	2.68121	1.94852	0.176402	0.327177	0.0704078	0.971069	N	N	0	1	0	1
YKR103W	3.40975	4.45233	3.93104	1.57522	0.88673	1.23098	1.21584	1.07248	1.14416	0.504258	0.0635839	0.53602	0.114871	N	N	0	1	1	2
YLL024C	84.5618	70.4952	77.5285	37.0177	56.1596	46.5886	69.3029	92.2336	80.7683	0.221181	0.132012	-0.0177794	0.430567	N	N	0	0	1	1
YLL026W	127.525	94.241	110.883	40.9557	64.7313	52.8435	66.5673	98.1323	82.3498	0.321872	0.117369	0.129202	0.416139	N	N	1	0	3	4
YLL043W	6.13755	8.1626	7.15007	5.51327	4.13807	4.82567	4.86336	8.04363	6.45349	0.170753	0.214901	0.0445156	0.946328	N	N	0	1	0	1
YLL045C	8.86534	5.19438	7.02986	7.8761	7.38942	7.63276	16.1099	10.7248	13.4174	-0.0357346	0.798164	-0.28072	0.168522	N	N	0	1	0	1
YLL048C	25.2321	25.9719	25.602	15.7522	13.0054	14.3788	17.0218	16.0873	16.5545	0.250552	0.0615522	0.189358	0.00476432	N	N	0	3	2	5
YLL050C	5.4556	3.33925	4.39742	6.30088	3.8425	5.07169	12.7663	12.3336	12.5499	-0.0619545	0.71876	-0.455444	0.0805431	N	N	2	1	0	3
YLL051C	6.8195	9.64671	8.2331	4.72566	2.95577	3.84071	5.47128	9.11611	7.2937	0.331152	0.141969	0.0526159	0.98837	N	N	0	1	1	2
YLR008C	1.3639	0.371027	0.867463	1.57522	0.591154	1.08319	0.60792	2.14497	1.37644	-0.0964522	0.786783	-0.200507	0.297953	N	N	0	0	1	1
YLR018C	2.04585	1.48411	1.76498	3.93805	1.77346	2.85576	1.21584	3.75369	2.48477	-0.208981	0.49201	-0.148546	0.244371	N	N	1	0	0	1
YLR019W	3.40975	2.59719	3.00347	0.78761	0.591154	0.689382	1.21584	2.14497	1.6804	0.639164	0.0954676	0.25221	0.176677	N	N	0	1	1	2
YLR027C	5.4556	4.82336	5.13948	7.08849	4.13807	5.61328	8.20692	8.04363	8.12528	-0.038298	0.802823	-0.198919	0.0641493	N	N	0	1	0	1
YLR028C	4.0917	8.53363	6.31266	2.36283	5.91154	4.13718	8.51088	8.57987	8.54538	0.183508	0.527433	-0.131519	0.495865	N	N	0	0	1	1
YLR029C	15.6848	18.9224	17.3036	15.7522	18.3258	17.039	26.7485	35.9282	31.3383	0.00669336	0.910401	-0.257939	0.0359995	N	N	1	1	0	2
YLR035C	1.3639	1.85514	1.60952	0.78761	0.88673	0.83717	1.21584	2.14497	1.6804	0.283882	0.184419	-0.0187178	0.464722	N	N	0	1	0	1
YLR038C	1.3639	0.371027	0.867463	1.57522	0.591154	1.08319	0.91188	1.60873	1.2603	-0.0964522	0.786783	-0.162224	0.447033	N	N	1	3	0	4
YLR039C	2.04585	2.59719	2.32152	2.36283	1.77346	2.06815	3.64752	6.97114	5.30933	0.0501914	0.594454	-0.359267	0.109255	N	N	0	1	1	2
YLR044C	195.038	115.761	155.399	126.018	135.374	130.696	149.244	197.337	173.291	0.0751865	0.644899	-0.0473269	0.586043	N	N	2	4	3	9
YLR045C	2.7278	3.71027	3.21904	1.57522	0.88673	1.23098	3.64752	2.14497	2.89624	0.417477	0.0929417	0.0458907	0.382735	N	N	0	1	0	1
YLR047C	8.86534	6.30747	7.58641	3.93805	2.66019	3.29912	0.91188	5.36242	3.13715	0.361638	0.136691	0.383501	0.19032	N	N	0	0	1	1
YLR048W	16.3668	7.42055	11.8937	11.0265	7.09384	9.06019	17.9336	18.7685	18.3511	0.118179	0.642663	-0.188345	0.37582	N	N	1	2	0	3
YLR056W	33.4155	25.9719	29.6937	29.1416	23.3506	26.2461	58.0564	67.5665	62.8114	0.0536004	0.544714	-0.325374	0.0237741	N	N	1	0	3	4
YLR057W	5.4556	4.82336	5.13948	6.30088	3.25134	4.77611	2.43168	2.68121	2.55644	0.0318444	0.851684	0.303282	0.0700925	N	N	1	0	0	1
YLR058C	17.7307	5.19438	11.4625	7.8761	9.75403	8.81507	10.6386	13.406	12.0223	0.114055	0.745728	-0.0207077	0.87467	N	N	0	2	2	4
YLR059C	1.3639	0.742055	1.05298	0.78761	1.18231	0.984958	1.21584	2.14497	1.6804	0.029001	0.873165	-0.202995	0.16725	N	N	0	0	2	2
YLR060W	10.2292	6.30747	8.26835	5.51327	4.72923	5.12125	8.20692	3.75369	5.98031	0.208043	0.346904	0.140696	0.300508	N	N	1	0	0	1
YLR061W	2.04585	2.59719	2.32152	1.57522	2.06904	1.82213	5.16732	2.68121	3.92427	0.105193	0.311015	-0.227986	0.334748	N	N	1	1	1	3
YLR071C	9.54729	11.8729	10.7101	5.51327	5.32038	5.41683	8.20692	6.97114	7.58903	0.296048	0.135581	0.149606	0.189319	N	N	0	2	0	2
YLR075W	12.957	7.42055	10.1888	11.0265	10.0496	10.5381	27.0524	28.4208	27.7366	-0.0146384	0.920385	-0.434931	0.0935627	N	N	0	2	0	2
YLR083C	4.77365	1.85514	3.31439	6.30088	3.25134	4.77611	3.34356	6.4349	4.88923	-0.158671	0.5603	-0.168837	0.325808	N	N	0	0	1	1
YLR084C	4.0917	2.22616	3.15893	3.93805	1.18231	2.56018	2.73564	1.60873	2.17218	0.0912699	0.757532	0.162644	0.3912	N	N	0	0	1	1
YLR087C	73.6506	62.7036	68.1771	14.9646	17.439	16.2018	11.2465	10.1886	10.7176	0.624075	0.0557947	0.803543	0.0596485	N	N	0	1	0	1
YLR096W	8.86534	10.7598	9.81257	5.51327	5.91154	5.7124	3.95148	4.28994	4.12071	0.234964	0.132033	0.376811	0.104264	N	N	0	1	0	1
YLR106C	190.264	146.927	168.595	38.5929	38.425	38.5089	31.0039	26.8121	28.908	0.641284	0.105073	0.765827	0.0965988	N	N	1	1	3	5
YLR109W	32.0516	15.9542	24.0029	14.177	17.1435	15.6602	30.396	43.9718	37.1839	0.185466	0.485189	-0.190091	0.256038	N	N	1	2	2	5
YLR110C	40.917	17.8093	29.3631	10.2389	13.5965	11.9177	26.4445	24.6671	25.5558	0.391609	0.368349	0.0603126	0.775534	N	N	3	5	1	9
YLR117C	2.7278	3.33925	3.03352	0.78761	1.47788	1.13275	2.12772	1.60873	1.86822	0.427814	0.0554541	0.210518	0.10826	N	N	0	0	1	1
YLR120C	11.5931	18.1803	14.8867	6.30088	9.16288	7.73188	8.20692	16.6235	12.4152	0.284515	0.240364	0.0788456	0.934988	N	N	0	0	1	1
YLR125W	2.04585	0.371027	1.20844	0.78761	0.88673	0.83717	0.30396	1.07248	0.688222	0.159411	0.734337	0.244496	0.762939	N	N	0	1	0	1
YLR130C	2.7278	2.22616	2.47698	0.78761	2.06904	1.42832	2.43168	2.14497	2.28832	0.239096	0.326295	0.0344052	0.481401	N	N	0	1	0	1
YLR134W	4.0917	3.71027	3.90099	3.93805	2.06904	3.00354	2.43168	6.4349	4.43329	0.11354	0.509495	-0.055552	0.361369	N	N	0	1	1	2
YLR143W	2.04585	0.742055	1.39395	0.78761	0.88673	0.83717	1.5198	1.07248	1.29614	0.221434	0.549584	0.0315952	0.802307	N	N	0	1	0	1
YLR144C	2.7278	2.96822	2.84801	2.36283	3.25134	2.80709	5.16732	2.68121	3.92427	0.00628543	0.9421	-0.139217	0.596542	N	N	0	1	0	1
YLR150W	15.6848	10.0177	12.8513	6.30088	12.1186	9.20976	17.6297	21.9859	19.8078	0.144698	0.464549	-0.18789	0.182186	N	N	1	1	0	2
YLR153C	37.5072	29.3112	33.4092	18.115	22.1683	20.1416	37.3871	28.9571	33.1721	0.219771	0.143603	0.00309338	0.675843	N	N	0	1	0	1
YLR167W	19.0946	10.7598	14.9272	17.3274	21.2815	19.3045	35.8673	35.392	35.6296	-0.11168	0.475084	-0.377833	0.126927	N	N	0	0	1	1
YLR173W	5.4556	4.82336	5.13948	3.15044	2.06904	2.60974	3.34356	3.21745	3.28051	0.294322	0.079424	0.194978	0.102662	N	N	1	0	0	1
YLR177W	12.2751	3.71027	7.99268	2.36283	2.66019	2.51151	1.82376	5.89866	3.86121	0.502758	0.422029	0.315969	0.598171	N	N	0	0	1	1
YLR180W	6.13755	8.1626	7.15007	11.0265	12.4142	11.7204	20.3653	16.0873	18.2263	-0.214631	0.0783615	-0.406388	0.0211455	N	N	0	1	1	2
YLR185W	4.0917	1.85514	2.97342	3.15044	3.25134	3.20089	6.38316	9.65235	8.01776	-0.0320152	0.872268	-0.430797	0.0599976	N	N	0	1	0	1
YLR192C	2.7278	2.59719	2.66249	3.15044	3.54692	3.34868	2.73564	4.82618	3.78091	-0.0995849	0.151694	-0.152307	0.191613	N	N	0	1	0	1
YLR197W	5.4556	1.48411	3.46985	7.08849	4.43365	5.76107	10.6386	13.9423	12.2904	-0.220192	0.451045	-0.549257	0.0918626	N	N	1	2	0	3
YLR204W	0.68195	0.371027	0.526488	1.57522	0.591154	1.08319	0.91188	1.07248	0.992182	-0.313314	0.451441	-0.275202	0.17168	N	N	0	1	0	1
YLR208W	2.7278	2.22616	2.47698	2.36283	1.77346	2.06815	2.73564	2.14497	2.4403	0.0783417	0.403912	0.00647879	0.604156	N	N	0	2	0	2
YLR209C	3.40975	1.11308	2.26142	0.78761	0.88673	0.83717	0.60792	2.14497	1.37644	0.431567	0.431693	0.215622	0.740105	N	N	1	0	0	1
YLR225C	4.77365	2.96822	3.87093	5.51327	3.54692	4.5301	6.0792	10.1886	8.1339	-0.0682917	0.67063	-0.322483	0.0624078	N	N	0	1	0	1
YLR231C	2.04585	1.85514	1.95049	2.36283	1.18231	1.77257	1.21584	1.07248	1.14416	0.0415413	0.81396	0.231657	0.0459644	N	N	1	1	0	2
YLR238W	1.3639	0.742055	1.05298	0.78761	0.591154	0.689382	0.30396	1.07248	0.688222	0.183959	0.440346	0.18469	0.691212	N	N	0	1	0	1
YLR244C	10.2292	8.1626	9.19592	7.08849	5.61596	6.35222	12.1584	12.8698	12.5141	0.16067	0.16765	-0.133804	0.174269	N	N	0	1	0	1
YLR248W	12.2751	10.0177	11.1464	5.51327	3.8425	4.67788	5.16732	6.97114	6.06923	0.377086	0.051285	0.264001	0.115982	N	N	0	1	0	1
YLR249W	132.298	113.905	123.102	74.0353	84.535	79.2851	165.962	175.351	170.657	0.191073	0.0783221	-0.141859	0.099111	N	N	2	3	3	8
YLR257W	7.50145	4.45233	5.97689	3.93805	3.25134	3.5947	3.64752	8.57987	6.1137	0.220813	0.353048	-0.00982876	0.559821	N	N	0	1	1	2
YLR259C	47.0545	33.0214	40.038	22.8407	15.6656	19.2531	17.6297	33.247	25.4383	0.317971	0.159513	0.196983	0.34407	N	N	0	1	1	2
YLR264W	2.04585	0.742055	1.39395	0.78761	1.47788	1.13275	1.82376	4.28994	3.05685	0.0901149	0.766165	-0.341026	0.126645	N	N	0	2	2	4
YLR266C	1.3639	1.11308	1.23849	1.57522	1.18231	1.37876	2.43168	4.28994	3.36081	-0.046597	0.617672	-0.433551	0.0946302	N	N	0	0	2	2
YLR270W	3.40975	4.0813	3.74552	3.93805	1.18231	2.56018	4.25544	6.97114	5.61329	0.165242	0.544472	-0.175705	0.11817	N	N	0	0	1	1
YLR273C	1.3639	0.371027	0.867463	2.36283	0.295577	1.3292	2.12772	3.75369	2.94071	-0.18534	0.738904	-0.530201	0.0647014	N	N	0	0	1	1
YLR274W	3.40975	2.59719	3.00347	1.57522	1.77346	1.67434	2.73564	3.21745	2.97655	0.25378	0.172431	0.00391068	0.857417	N	N	1	0	0	1
YLR276C	1.3639	2.22616	1.79503	1.57522	1.47788	1.52655	4.5594	2.14497	3.35218	0.0703606	0.645143	-0.271256	0.338677	N	N	1	0	0	1
YLR278C	37.5072	21.5196	29.5134	8.66371	8.57173	8.61772	8.51088	7.50739	8.00913	0.534627	0.232599	0.566434	0.223879	N	N	0	0	2	2
YLR283W	1.3639	1.11308	1.23849	0.78761	0.88673	0.83717	0.91188	3.21745	2.06467	0.170079	0.157194	-0.221957	0.235828	N	N	0	1	0	1
YLR285C-A	0.68195	0.371027	0.526488	0.78761	0.295577	0.541593	0.30396	0.536242	0.420101	-0.0122844	0.964075	0.0980352	0.811182	N	N	1	0	0	1
YLR286C	58.6477	28.5691	43.6084	12.6018	11.5275	12.0646	29.7881	33.7832	31.7857	0.558056	0.282889	0.137339	0.602667	N	N	1	3	7	11
YLR287C-A	2.7278	2.59719	2.66249	0.78761	4.72923	2.75842	8.20692	5.89866	7.05279	-0.0153714	0.969042	-0.423072	0.0921251	N	N	1	0	0	1
YLR293C	6.13755	6.30747	6.22251	7.8761	7.685	7.78055	11.2465	14.4785	12.8625	-0.0970448	0.00701097	-0.315361	0.0661446	N	N	0	1	1	2
YLR297W	0.68195	1.48411	1.08303	3.15044	1.77346	2.46195	4.5594	4.82618	4.69279	-0.356639	0.254981	-0.636791	0.0627854	N	N	1	1	0	2
YLR300W	17.7307	14.099	15.9149	8.66371	9.45846	9.06108	17.6297	20.9134	19.2716	0.244623	0.151287	-0.0831139	0.22371	N	N	1	0	0	1
YLR304C	23.1863	33.0214	28.1039	8.66371	19.5081	14.0859	23.4049	30.5658	26.9854	0.299982	0.196779	0.0176378	0.915257	N	N	0	3	0	3
YLR305C	27.278	28.5691	27.9235	14.9646	13.301	14.1328	11.2465	20.3772	15.8119	0.295743	0.00724422	0.246988	0.124158	N	N	0	0	2	2
YLR310C	15.0029	19.2934	17.1482	13.3894	9.45846	11.4239	8.51088	18.7685	13.6397	0.176403	0.188978	0.0994135	0.804926	N	N	0	0	1	1
YLR324W	4.0917	4.45233	4.27201	3.15044	2.06904	2.60974	3.34356	4.28994	3.81675	0.214036	0.172697	0.0489391	0.543418	N	N	0	1	0	1
YLR328W	0.68195	1.48411	1.08303	0.78761	0.591154	0.689382	0.91188	2.14497	1.52842	0.196181	0.501211	-0.149604	0.282483	N	N	1	0	0	1
YLR332W	0.68195	1.85514	1.26854	1.57522	0.88673	1.23098	1.5198	2.68121	2.1005	0.013056	0.961997	-0.219018	0.271919	N	N	0	2	1	3
YLR335W	5.4556	3.33925	4.39742	2.36283	3.25134	2.80709	4.5594	4.28994	4.42467	0.194942	0.351968	-0.00268259	0.975886	N	N	0	1	0	1
YLR340W	12.2751	7.79157	10.0333	11.0265	8.8673	9.94692	14.2861	19.3047	16.7954	0.0037566	0.976481	-0.223745	0.119951	N	N	0	2	1	3
YLR342W	119.341	87.5625	103.452	52.7699	46.4056	49.5877	77.5098	77.7551	77.6324	0.319364	0.17109	0.124695	0.351876	N	N	3	0	1	4
YLR344W	4.0917	2.96822	3.52996	3.15044	2.36461	2.75753	5.16732	6.97114	6.06923	0.10725	0.388337	-0.235364	0.0577425	N	N	1	1	1	3
YLR353W	3.40975	1.11308	2.26142	2.36283	2.36461	2.36372	2.43168	2.14497	2.28832	-0.0192161	0.943432	-0.00513724	0.975204	N	N	0	0	1	1
YLR354C	36.1433	14.4701	25.3067	18.9026	17.7346	18.3186	19.4534	32.1745	25.814	0.140343	0.635292	-0.00861946	0.792712	N	N	0	1	0	1
YLR355C	78.4242	89.0466	83.7354	60.646	66.5048	63.5754	124.624	157.655	141.139	0.11962	0.110893	-0.226739	0.0319635	N	N	0	0	2	2
YLR356W	1.3639	1.48411	1.424	1.57522	1.18231	1.37876	1.82376	1.60873	1.71624	0.0140215	0.857493	-0.0810675	0.0992745	N	N	0	1	0	1
YLR359W	6.13755	3.33925	4.7384	3.93805	3.8425	3.89027	9.1188	8.57987	8.84934	0.0856512	0.653052	-0.271279	0.212643	N	N	0	1	1	2
YLR366W	0.68195	0.371027	0.526488	0.78761	0.295577	0.541593	0.30396	0.536242	0.420101	-0.0122844	0.964075	0.0980352	0.811182	N	N	0	0	1	1
YLR367W	66.1491	78.6578	72.4035	38.5929	31.3311	34.962	14.5901	19.841	17.2155	0.316163	0.0547957	0.623839	0.063485	N	N	1	0	2	3
YLR372W	5.4556	5.93644	5.69602	4.72566	2.95577	3.84071	7.29504	8.57987	7.93746	0.171159	0.266472	-0.14411	0.0284742	N	N	1	1	1	3
YLR378C	2.04585	3.33925	2.69255	2.36283	2.06904	2.21593	1.82376	3.21745	2.52061	0.0846066	0.593958	0.0286584	0.838279	N	N	0	0	1	1
YLR388W	0.68195	0.742055	0.712002	0.78761	0.591154	0.689382	2.73564	1.60873	2.17218	0.0140215	0.857493	-0.484415	0.145944	N	N	1	1	0	2
YLR389C	6.8195	8.53363	7.67656	5.51327	5.91154	5.7124	6.0792	10.7248	8.40202	0.128348	0.248377	-0.0392169	0.330687	N	N	0	1	0	1
YLR390W-A	16.3668	15.5831	15.975	11.8141	12.4142	12.1142	24.6208	24.6671	24.6439	0.120146	0.0191822	-0.18827	0.0285829	N	N	1	1	1	3
YLR396C	1.3639	2.22616	1.79503	2.36283	1.47788	1.92036	3.95148	3.21745	3.58447	-0.0293098	0.858019	-0.300352	0.127166	N	N	0	1	0	1
YLR402W	0.68195	0.742055	0.712002	1.57522	0.591154	1.08319	0.30396	1.60873	0.956343	-0.182222	0.588362	-0.128132	0.328691	N	N	1	0	0	1
YLR410W	15.6848	13.728	14.7064	5.51327	8.57173	7.0425	7.599	10.7248	9.16192	0.31978	0.0680915	0.205521	0.0675252	N	N	0	1	0	1
YLR413W	54.556	45.6364	50.0962	33.8672	34.5825	34.2249	75.0781	103.495	89.2864	0.165463	0.172414	-0.250981	0.045186	N	N	0	0	1	1
YLR414C	9.54729	3.33925	6.44327	1.57522	3.8425	2.70886	5.16732	9.11611	7.14172	0.37632	0.428904	-0.0446963	0.683942	N	N	0	1	0	1
YLR418C	1.3639	1.48411	1.424	2.36283	0.591154	1.47699	2.12772	2.68121	2.40446	-0.0158667	0.961985	-0.227507	0.0456578	N	N	0	1	0	1
YLR420W	3.40975	1.11308	2.26142	1.57522	1.47788	1.52655	6.68712	3.21745	4.95229	0.170669	0.637541	-0.340425	0.340705	N	N	0	0	2	2
YLR421C	2.04585	1.48411	1.76498	1.57522	0.591154	1.08319	2.73564	2.68121	2.70843	0.212036	0.377863	-0.185977	0.186027	N	N	1	1	0	2
YLR427W	2.7278	2.59719	2.66249	2.36283	3.25134	2.80709	2.73564	3.21745	2.97655	-0.0229671	0.799946	-0.0484238	0.119953	N	N	1	0	0	1
YLR430W	37.5072	28.1981	32.8527	14.9646	7.98057	11.4726	9.1188	13.406	11.2624	0.456909	0.0747119	0.464939	0.127304	N	N	0	0	1	1
YLR435W	1.3639	0.742055	1.05298	1.57522	0.295577	0.935398	1.82376	2.14497	1.98436	0.0514223	0.8888	-0.275202	0.17168	N	N	1	0	0	1
YLR441C	17.0487	5.56541	11.3071	11.0265	6.50269	8.76461	23.7089	27.3483	25.5286	0.110617	0.737865	-0.353677	0.223795	N	N	4	4	3	11
YLR442C	4.77365	3.71027	4.24196	0.78761	2.06904	1.42832	1.5198	3.21745	2.36863	0.47274	0.0811722	0.25307	0.173148	N	N	0	0	1	1
YLR447C	6.13755	4.0813	5.10942	4.72566	2.95577	3.84071	11.5505	13.406	12.4783	0.12396	0.450254	-0.387782	0.0478483	N	N	0	1	0	1
YLR448W	6.13755	3.71027	4.92391	4.72566	3.54692	4.13629	7.90296	8.04363	7.9733	0.0756991	0.637208	-0.209328	0.238393	N	N	1	0	1	2
YLR450W	12.2751	9.64671	10.9609	8.66371	6.20711	7.43541	12.1584	12.3336	12.246	0.168541	0.189655	-0.0481473	0.496344	N	N	0	1	1	2
YLR452C	3.40975	2.22616	2.81796	1.57522	3.25134	2.41328	4.86336	4.82618	4.84477	0.0673261	0.735051	-0.235339	0.181566	N	N	0	2	0	2
YLR454W	50.4643	32.6504	41.5573	10.2389	11.8231	11.031	9.72672	18.2322	13.9795	0.576033	0.178313	0.473157	0.198865	N	N	0	1	0	1
YLR455W	0.68195	0.742055	0.712002	0.78761	0.591154	0.689382	0.91188	1.07248	0.992182	0.0140215	0.857493	-0.14411	0.0284742	N	N	0	1	0	1
YLR459W	2.04585	1.48411	1.76498	0.78761	0.88673	0.83717	1.21584	2.68121	1.94852	0.323926	0.17805	-0.0429664	0.36269	N	N	0	1	2	3
YML008C	27.278	24.8588	26.0684	18.115	21.8727	19.9939	26.7485	34.3195	30.534	0.115218	0.133322	-0.0686689	0.12619	N	N	0	0	1	1
YML009C	0.68195	0.742055	0.712002	0.78761	0.295577	0.541593	1.21584	1.60873	1.41228	0.118808	0.613827	-0.29744	0.0581889	N	N	0	1	0	1
YML009W-B	2.7278	0.371027	1.54941	0.78761	0.295577	0.541593	0.30396	0.536242	0.420101	0.456494	0.547006	0.566813	0.530092	N	N	1	0	0	1
YML010W	8.86534	9.64671	9.25603	7.8761	4.72923	6.30266	7.29504	7.50739	7.40121	0.166901	0.298307	0.0971217	0.130491	N	N	1	0	0	1
YML016C	4.0917	2.59719	3.34444	1.57522	0.88673	1.23098	2.43168	7.50739	4.96953	0.434075	0.174227	-0.171992	0.21736	N	N	1	0	1	2
YML017W	9.54729	2.59719	6.07224	7.08849	5.0248	6.05665	4.25544	5.89866	5.07705	0.00111687	0.997179	0.0777376	0.894084	N	N	1	1	0	2
YML018C	6.13755	2.96822	4.55288	4.72566	4.72923	4.72744	6.0792	6.97114	6.52517	-0.0163399	0.930154	-0.156306	0.394622	N	N	0	0	1	1
YML022W	2.04585	0.371027	1.20844	0.78761	1.18231	0.984958	1.5198	3.75369	2.63675	0.0888065	0.83484	-0.338844	0.205563	N	N	1	0	0	1
YML023C	2.7278	3.71027	3.21904	2.36283	1.18231	1.77257	2.43168	1.07248	1.75208	0.259123	0.204476	0.264171	0.108367	N	N	0	1	0	1
YML024W	6.13755	4.45233	5.29494	5.51327	7.38942	6.45134	14.5901	12.8698	13.7299	-0.0857894	0.456853	-0.413808	0.0309259	N	N	1	1	0	2
YML026C	8.1834	6.30747	7.24543	6.30088	4.72923	5.51505	12.7663	15.0148	13.8905	0.118514	0.296445	-0.282655	0.0360738	N	N	0	1	0	1
YML028W	14.3209	8.1626	11.2418	20.4779	13.0054	16.7416	34.0435	34.3195	34.1815	-0.172963	0.377396	-0.482956	0.0845587	N	N	1	1	0	2
YML041C	1.3639	0.742055	1.05298	0.78761	0.591154	0.689382	1.21584	2.14497	1.6804	0.183959	0.440346	-0.202995	0.16725	N	N	0	1	0	1
YML048W	4.77365	5.19438	4.98402	4.72566	2.95577	3.84071	6.68712	9.11611	7.90162	0.113167	0.411439	-0.200137	0.0812472	N	N	1	1	0	2
YML049C	8.1834	3.71027	5.94683	5.51327	2.95577	4.23452	5.47128	8.04363	6.75745	0.147482	0.589461	-0.0554973	0.632179	N	N	0	1	0	1
YML051W	4.77365	5.19438	4.98402	3.93805	3.54692	3.74249	3.0396	6.97114	5.00537	0.124419	0.0500459	-0.00185706	0.488925	N	N	0	1	0	1
YML056C	6.13755	3.33925	4.7384	8.66371	3.54692	6.10532	13.9822	14.4785	14.2303	-0.110077	0.69674	-0.477584	0.0898457	N	N	0	2	3	5
YML063W	12.957	9.64671	11.3019	8.66371	9.45846	9.06108	33.4356	32.1745	32.8051	0.0959705	0.396374	-0.46279	0.0427035	N	N	0	1	0	1
YML072C	23.8682	26.714	25.2911	15.7522	17.439	16.5956	17.0218	22.5222	19.772	0.182974	0.0522487	0.106918	0.171406	N	N	0	1	2	3
YML073C	5.4556	3.71027	4.58294	5.51327	2.06904	3.79115	12.4624	11.7973	12.1298	0.0823724	0.733187	-0.422711	0.0663928	N	N	0	1	0	1
YML074C	4.0917	3.71027	3.90099	1.57522	2.95577	2.26549	6.68712	2.68121	4.68417	0.236011	0.235645	-0.0794579	0.86386	N	N	0	1	0	1
YML075C	20.4585	10.0177	15.2381	7.8761	4.72923	6.30266	10.9426	4.82618	7.88437	0.383407	0.319821	0.286164	0.322293	N	N	0	2	1	3
YML076C	7.50145	3.33925	5.42035	2.36283	1.77346	2.06815	1.82376	2.68121	2.25248	0.418446	0.349552	0.381365	0.388831	N	N	0	0	1	1
YML081W	19.7765	16.3252	18.0509	8.66371	4.72923	6.69647	8.81484	12.8698	10.8423	0.430652	0.0507279	0.221376	0.117244	N	N	0	1	1	2
YML086C	2.04585	1.11308	1.57947	2.36283	2.66019	2.51151	3.64752	3.75369	3.70061	-0.201425	0.274277	-0.369763	0.135147	N	N	0	0	1	1
YML092C	3.40975	1.48411	2.44693	3.93805	2.06904	3.00354	4.86336	4.28994	4.57665	-0.0890126	0.718556	-0.271926	0.281728	N	N	0	1	0	1
YML100W	58.6477	33.7635	46.2056	14.177	17.7346	15.9558	15.502	22.5222	19.0121	0.461776	0.242768	0.385665	0.284567	N	N	0	2	2	4
YML103C	13.639	11.8729	12.7559	2.36283	5.91154	4.13718	9.42276	9.11611	9.26944	0.489008	0.0827114	0.138659	0.152351	N	N	0	1	1	2
YML104C	4.0917	3.71027	3.90099	3.15044	2.36461	2.75753	2.12772	3.21745	2.67259	0.150655	0.165661	0.164243	0.116431	N	N	0	0	1	1
YML111W	6.13755	10.3888	8.26316	6.30088	4.72923	5.51505	4.86336	6.97114	5.91725	0.175596	0.404381	0.145026	0.546117	N	N	1	0	0	1
YML113W	1.3639	1.48411	1.424	1.57522	1.77346	1.67434	1.21584	0.536242	0.876041	-0.0703324	0.189957	0.210987	0.117602	N	N	0	1	0	1
YML115C	4.0917	5.56541	4.82855	4.72566	1.77346	3.24956	4.86336	3.75369	4.30853	0.171993	0.469081	0.0494883	0.464872	N	N	1	3	0	4
YML126C	15.6848	15.9542	15.8195	11.8141	10.3452	11.0797	26.7485	31.102	28.9253	0.154666	0.0890364	-0.262084	0.0456664	N	N	0	1	0	1
YML130C	19.0946	6.67849	12.8865	13.3894	6.20711	9.79824	13.0703	19.3047	16.1875	0.118988	0.717614	-0.0990433	0.574751	N	N	1	1	1	3
YMR002W	1.3639	0.742055	1.05298	1.57522	1.47788	1.52655	3.0396	3.21745	3.12853	-0.161293	0.365144	-0.472921	0.0872823	N	N	0	1	0	1
YMR006C	18.4126	20.7775	19.5951	11.8141	9.45846	10.6363	11.5505	21.9859	16.7682	0.265356	0.0329989	0.0676607	0.948771	N	N	0	0	1	1
YMR008C	29.3238	20.7775	25.0507	16.5398	13.8921	15.216	23.7089	27.8846	25.7967	0.21652	0.238822	-0.0127451	0.748158	N	N	0	1	1	2
YMR010W	3.40975	1.11308	2.26142	1.57522	0.88673	1.23098	1.5198	3.21745	2.36863	0.264131	0.529675	-0.0201162	0.726424	N	N	1	2	2	5
YMR011W	16.3668	6.30747	11.3371	15.7522	8.27615	12.0142	19.7574	24.6671	22.2123	-0.0251909	0.924544	-0.29209	0.235607	N	N	1	0	2	3
YMR012W	22.5043	12.986	17.7451	6.30088	5.0248	5.66284	12.4624	10.1886	11.3255	0.496045	0.233801	0.195023	0.377933	N	N	1	0	1	2
YMR019W	5.4556	8.90466	7.18013	3.15044	1.18231	2.16637	4.86336	3.21745	4.04041	0.520399	0.158863	0.249707	0.274465	N	N	0	1	0	1
YMR033W	2.7278	1.48411	2.10595	1.57522	1.18231	1.37876	3.95148	2.14497	3.04822	0.183959	0.440346	-0.160598	0.59395	N	N	1	0	1	2
YMR034C	3.40975	1.85514	2.63244	0.78761	0.88673	0.83717	0.91188	2.68121	1.79654	0.497545	0.258989	0.165921	0.712433	N	N	0	0	1	1
YMR043W	2.7278	1.48411	2.10595	2.36283	0.88673	1.62478	3.64752	3.21745	3.43249	0.112654	0.668758	-0.21216	0.29312	N	N	1	0	1	2
YMR054W	11.5931	7.79157	9.69236	8.66371	3.54692	6.10532	6.0792	4.82618	5.45269	0.200721	0.38548	0.249819	0.244413	N	N	0	1	0	1
YMR057C	0.68195	0.371027	0.526488	0.78761	0.295577	0.541593	0.30396	0.536242	0.420101	-0.0122844	0.964075	0.0980352	0.811182	N	N	0	1	0	1
YMR058W	6.13755	7.42055	6.77905	2.36283	4.72923	3.54603	5.77524	6.4349	6.10507	0.281426	0.174528	0.0454779	0.570328	N	N	0	1	0	1
YMR066W	2.7278	2.96822	2.84801	1.57522	1.77346	1.67434	2.73564	4.82618	3.78091	0.230698	0.0189463	-0.123055	0.205102	N	N	1	0	0	1
YMR071C	4.0917	2.96822	3.52996	2.36283	1.77346	2.06815	3.0396	3.75369	3.39665	0.232189	0.187152	0.0167192	0.949616	N	N	0	1	0	1
YMR079W	5.4556	2.96822	4.21191	6.30088	4.43365	5.36727	6.99108	8.04363	7.51735	-0.105274	0.540111	-0.251586	0.201049	N	N	0	2	1	3
YMR080C	12.957	17.4383	15.1977	6.30088	5.61596	5.95842	7.29504	6.97114	7.13309	0.406646	0.144543	0.328499	0.170485	N	N	0	1	1	2
YMR083W	15.0029	12.2439	13.6234	7.08849	8.57173	7.83011	15.198	19.841	17.5195	0.240518	0.09721	-0.109236	0.110547	N	N	1	0	0	1
YMR088C	5.4556	7.04952	6.25256	3.15044	2.06904	2.60974	7.90296	4.28994	6.09645	0.379461	0.0770254	0.0109809	0.473154	N	N	0	1	0	1
YMR089C	10.9112	8.90466	9.90793	3.15044	2.95577	3.0531	3.95148	5.89866	4.92507	0.511241	0.0899635	0.30357	0.0937873	N	N	0	1	1	2
YMR094W	3.40975	0.742055	2.0759	0.78761	1.18231	0.984958	0.91188	3.21745	2.06467	0.323789	0.562293	0.00235696	0.749431	N	N	0	1	0	1
YMR100W	4.0917	1.85514	2.97342	2.36283	2.06904	2.21593	2.12772	4.28994	3.20883	0.127699	0.62044	-0.0330906	0.616305	N	N	2	0	0	2
YMR103C	0.68195	1.11308	0.897516	0.78761	0.88673	0.83717	0.60792	1.07248	0.840202	0.0302284	0.82705	0.0286584	0.838279	N	N	0	1	0	1
YMR108W	93.4271	103.888	98.6574	55.9203	67.9827	61.9515	81.1573	108.857	95.0072	0.202078	0.0458698	0.016373	0.744561	N	N	0	0	1	1
YMR116C	10.9112	3.71027	7.31073	3.15044	6.20711	4.67878	12.7663	9.65235	11.2093	0.193829	0.59759	-0.185619	0.542615	N	N	0	3	2	5
YMR119W	5.4556	1.48411	3.46985	3.93805	3.25134	3.5947	4.25544	3.75369	4.00457	-0.0153512	0.960175	-0.0622445	0.870645	N	N	0	1	0	1
YMR120C	8.86534	11.1308	9.99808	4.72566	5.32038	5.02302	10.0307	15.551	12.7908	0.298952	0.123977	-0.106983	0.149204	N	N	0	1	3	4
YMR122W-A	11.5931	8.53363	10.0634	5.51327	7.38942	6.45134	11.2465	18.2322	14.7394	0.193094	0.207295	-0.165735	0.11168	N	N	0	0	1	1
YMR125W	10.2292	5.93644	8.08284	3.15044	3.25134	3.20089	6.68712	10.1886	8.43786	0.402293	0.263548	-0.0186682	0.670821	N	N	0	1	0	1
YMR135C	4.77365	6.30747	5.54056	3.93805	1.18231	2.56018	3.64752	3.21745	3.43249	0.335283	0.233251	0.207945	0.206396	N	N	0	1	0	1
YMR136W	4.77365	7.42055	6.0971	1.57522	2.06904	1.82213	4.86336	4.82618	4.84477	0.524544	0.181065	0.09985	0.515218	N	N	1	1	0	2
YMR142C	8.86534	7.79157	8.32846	8.66371	8.27615	8.46993	23.7089	16.6235	20.1662	-0.00731509	0.838581	-0.384059	0.0885856	N	N	0	0	1	1
YMR143W	8.1834	2.59719	5.39029	4.72566	4.72923	4.72744	12.4624	9.65235	11.0574	0.056986	0.851664	-0.312039	0.313269	N	N	0	1	1	2
YMR145C	2.04585	1.11308	1.57947	1.57522	1.18231	1.37876	0.91188	1.60873	1.2603	0.0590204	0.745455	0.0980352	0.811182	N	N	0	0	2	2
YMR146C	8.1834	8.1626	8.173	4.72566	3.8425	4.28408	6.68712	6.4349	6.56101	0.280524	0.0718399	0.0954106	0.0205624	N	N	0	0	1	1
YMR147W	0.68195	1.11308	0.897516	1.57522	1.18231	1.37876	1.5198	1.07248	1.29614	-0.186448	0.241773	-0.15961	0.391453	N	N	1	0	0	1
YMR154C	4.0917	0.371027	2.23136	1.57522	0.591154	1.08319	2.43168	1.60873	2.0202	0.313867	0.647373	0.0431751	0.859803	N	N	0	1	1	2
YMR177W	4.0917	1.85514	2.97342	0.78761	1.47788	1.13275	1.82376	2.68121	2.25248	0.419123	0.330885	0.120594	0.729435	N	N	1	0	0	1
YMR181C	5.4556	5.56541	5.5105	2.36283	3.25134	2.80709	4.25544	9.11611	6.68578	0.292935	0.099438	-0.0839606	0.29888	N	N	0	0	1	1
YMR183C	2.7278	1.11308	1.92044	1.57522	0.88673	1.23098	0.91188	1.60873	1.2603	0.193152	0.54624	0.182926	0.654566	N	N	1	0	0	1
YMR186W	36.1433	31.9084	34.0258	14.177	20.6904	17.4337	34.6514	44.5081	39.5798	0.29042	0.0657952	-0.0656643	0.135172	N	N	3	3	1	7
YMR189W	13.639	15.5831	14.6111	3.15044	7.09384	5.12214	6.0792	13.9423	10.0107	0.455231	0.0842639	0.164216	0.388844	N	N	1	0	1	2
YMR191W	0.68195	0.371027	0.526488	0.78761	2.36461	1.57611	3.95148	5.36242	4.65695	-0.476198	0.404157	-0.946713	0.0243786	N	N	0	2	1	3
YMR194W	2.04585	0.371027	1.20844	1.57522	1.77346	1.67434	2.43168	4.82618	3.62893	-0.141619	0.676627	-0.477554	0.111413	N	N	2	1	1	4
YMR195W	1.3639	0.742055	1.05298	0.78761	0.88673	0.83717	0.60792	1.07248	0.840202	0.0996052	0.612921	0.0980352	0.811182	N	N	0	0	1	1
YMR200W	2.04585	3.71027	2.87806	1.57522	1.77346	1.67434	3.34356	2.14497	2.74426	0.235256	0.382466	0.0206741	0.69597	N	N	1	0	0	1
YMR202W	2.7278	2.22616	2.47698	7.08849	3.25134	5.16992	7.29504	5.89866	6.59685	-0.319561	0.391061	-0.425414	0.0170342	N	N	1	1	0	2
YMR205C	68.8769	69.7531	69.315	38.5929	40.7896	39.6912	46.8098	64.8853	55.8476	0.242133	0.0102181	0.0938232	0.295319	N	N	0	3	1	4
YMR214W	2.04585	2.22616	2.13601	1.57522	0.88673	1.23098	2.12772	1.60873	1.86822	0.239353	0.213662	0.0581738	0.143174	N	N	0	1	0	1
YMR215W	0.68195	0.742055	0.712002	0.78761	0.88673	0.83717	1.21584	1.07248	1.14416	-0.0703324	0.189957	-0.206006	0.014918	N	N	1	0	0	1
YMR217W	16.3668	10.0177	13.1923	9.45132	7.38942	8.42037	11.5505	15.551	13.5507	0.194988	0.357688	-0.0116439	0.744118	N	N	0	3	0	3
YMR218C	5.4556	1.48411	3.46985	1.57522	2.06904	1.82213	2.43168	3.21745	2.82457	0.279732	0.558087	0.0893594	0.858599	N	N	0	0	1	1
YMR219W	27.9599	18.9224	23.4412	4.72566	5.0248	4.87523	5.16732	5.89866	5.53299	0.681984	0.151653	0.627019	0.158403	N	N	0	1	0	1
YMR228W	2.7278	0.371027	1.54941	1.57522	0.295577	0.935398	1.5198	1.07248	1.29614	0.219171	0.703236	0.0775146	0.80883	N	N	0	1	0	1
YMR229C	49.7823	33.0214	41.4019	10.2389	12.4142	11.3266	16.7178	21.9859	19.3519	0.562921	0.167927	0.330297	0.237724	N	N	0	2	2	4
YMR230W	2.04585	1.11308	1.57947	2.36283	2.95577	2.6593	6.0792	5.89866	5.98893	-0.226257	0.212305	-0.578839	0.0655348	N	N	0	1	1	2
YMR237W	5.4556	5.56541	5.5105	3.15044	3.25134	3.20089	4.25544	4.82618	4.54081	0.23592	0.00108252	0.0840581	0.0768091	N	N	0	1	0	1
YMR238W	3.40975	1.85514	2.63244	1.57522	3.25134	2.41328	3.0396	4.28994	3.66477	0.0377508	0.865741	-0.143688	0.308364	N	N	1	0	0	1
YMR241W	4.77365	4.45233	4.61299	4.72566	1.77346	3.24956	3.0396	2.68121	2.86041	0.152158	0.52425	0.207555	0.0208701	N	N	0	1	0	1
YMR242C	2.7278	1.85514	2.29147	3.93805	5.91154	4.92479	13.3742	15.551	14.4626	-0.332274	0.188939	-0.800134	0.00367647	N	N	1	0	0	1
YMR243C	5.4556	1.85514	3.65537	2.36283	2.95577	2.6593	5.77524	5.89866	5.83695	0.138164	0.678057	-0.203255	0.434786	N	N	0	2	1	3
YMR247C	12.2751	6.30747	9.29128	3.93805	3.25134	3.5947	6.68712	6.97114	6.82913	0.412413	0.303931	0.13371	0.56988	N	N	0	1	1	2
YMR250W	20.4585	4.45233	12.4554	3.93805	5.91154	4.92479	5.47128	8.57987	7.02558	0.40297	0.518038	0.248676	0.664605	N	N	0	1	0	1
YMR251W-A	2.7278	4.0813	3.40455	4.72566	3.25134	3.9885	5.16732	3.75369	4.46051	-0.0687501	0.618943	-0.117325	0.48051	N	N	1	1	0	2
YMR257C	4.77365	2.22616	3.49991	0.78761	1.47788	1.13275	3.0396	1.07248	2.05604	0.489923	0.298957	0.231024	0.350204	N	N	0	2	0	2
YMR259C	6.13755	3.33925	4.7384	0.78761	2.06904	1.42832	4.86336	6.4349	5.64913	0.520805	0.216077	-0.0763503	0.517539	N	N	0	1	0	1
YMR266W	11.5931	7.79157	9.69236	3.15044	3.54692	3.34868	6.0792	12.3336	9.20638	0.461556	0.182029	0.0223405	0.705651	N	N	1	1	0	2
YMR270C	1.3639	0.371027	0.867463	1.57522	0.88673	1.23098	1.21584	1.07248	1.14416	-0.151998	0.614947	-0.120236	0.712412	N	N	0	1	0	1
YMR272C	7.50145	3.71027	5.60586	3.93805	3.54692	3.74249	5.47128	4.82618	5.14873	0.175482	0.504415	0.0369422	0.79932	N	N	0	1	0	1
YMR276W	5.4556	4.0813	4.76845	2.36283	2.95577	2.6593	3.0396	4.28994	3.66477	0.25361	0.160742	0.114331	0.442466	N	N	0	0	1	1
YMR277W	2.7278	3.33925	3.03352	1.57522	2.36461	1.96992	1.21584	2.68121	1.94852	0.187499	0.174762	0.192241	0.274792	N	N	0	1	0	1
YMR292W	2.04585	0.371027	1.20844	1.57522	0.591154	1.08319	1.21584	1.07248	1.14416	0.0475211	0.911589	0.0237369	0.924264	N	N	0	1	0	1
YMR296C	9.54729	10.3888	9.96803	5.51327	5.61596	5.56461	6.0792	4.28994	5.18457	0.253174	0.0573115	0.283897	0.0136574	N	N	0	1	0	1
YMR297W	21.1404	11.8729	16.5067	12.6018	12.4142	12.508	18.8455	19.3047	19.0751	0.120472	0.546723	-0.0628081	0.665838	N	N	0	1	0	1
YMR302C	4.0917	7.79157	5.94164	1.57522	2.36461	1.96992	3.64752	1.60873	2.62812	0.479458	0.266277	0.35426	0.269801	N	N	0	1	0	1
YMR304C-A	1.3639	2.22616	1.79503	0.78761	0.591154	0.689382	0.30396	1.07248	0.688222	0.415612	0.222941	0.416344	0.24577	N	N	1	1	0	2
YMR304W	12.957	13.357	13.157	5.51327	2.66019	4.08673	6.38316	11.2611	8.82212	0.507781	0.0939658	0.173584	0.23004	N	N	0	0	1	1
YMR305C	3.40975	3.33925	3.3745	2.36283	2.66019	2.51151	3.95148	2.68121	3.31635	0.128274	0.0940362	0.00754935	0.445014	N	N	0	1	0	1
YMR307W	17.0487	7.42055	12.2346	6.30088	8.57173	7.4363	17.0218	17.696	17.3589	0.216234	0.496387	-0.15193	0.469715	N	N	0	2	0	2
YMR309C	8.86534	6.30747	7.58641	3.93805	4.43365	4.18585	13.3742	12.8698	13.122	0.258252	0.218648	-0.237965	0.144847	N	N	0	1	0	1
YMR311C	2.7278	2.96822	2.84801	2.36283	0.591154	1.47699	4.86336	2.68121	3.77229	0.285163	0.361531	-0.122063	0.612399	N	N	0	0	1	1
YMR315W	3.40975	4.0813	3.74552	4.72566	4.43365	4.57966	7.599	6.4349	7.01695	-0.0873202	0.206351	-0.272636	0.0226401	N	N	0	1	0	1
YNL003C	1.3639	2.59719	1.98055	2.36283	2.06904	2.21593	1.82376	6.4349	4.12933	-0.0487719	0.768619	-0.319095	0.16465	N	N	0	1	0	1
YNL007C	16.3668	9.27568	12.8212	13.3894	10.0496	11.7195	11.2465	23.0584	17.1525	0.0390213	0.814016	-0.126397	0.25912	N	N	0	1	1	2
YNL016W	6.13755	3.33925	4.7384	4.72566	4.43365	4.57966	7.29504	14.4785	10.8868	0.0147986	0.928166	-0.361268	0.0795194	N	N	1	2	0	3
YNL023C	15.0029	10.0177	12.5103	4.72566	3.8425	4.28408	3.34356	3.21745	3.28051	0.465411	0.178145	0.581327	0.167323	N	N	1	0	0	1
YNL030W	4.0917	1.85514	2.97342	2.36283	2.36461	2.36372	3.64752	6.97114	5.30933	0.0996595	0.682227	-0.251784	0.161364	N	N	0	1	0	1
YNL031C	8.86534	4.0813	6.47332	7.08849	4.13807	5.61328	6.38316	10.1886	8.28588	0.0619104	0.79352	-0.107211	0.441852	N	N	0	1	0	1
YNL032W	0.68195	1.48411	1.08303	0.78761	1.18231	0.984958	1.21584	5.36242	3.28913	0.0412224	0.853083	-0.482441	0.162526	N	N	1	0	0	1
YNL042W	0.68195	0.371027	0.526488	1.57522	0.88673	1.23098	0.60792	0.536242	0.572081	-0.36886	0.255268	-0.0360687	0.888	N	N	0	1	0	1
YNL044W	0.68195	1.48411	1.08303	0.78761	0.295577	0.541593	1.5198	1.07248	1.29614	0.300967	0.388957	-0.0780123	0.843831	N	N	0	0	1	1
YNL048W	2.04585	1.85514	1.95049	1.57522	1.18231	1.37876	2.73564	2.14497	2.4403	0.150655	0.165661	-0.0972996	0.212058	N	N	0	0	1	1
YNL049C	4.77365	5.19438	4.98402	1.57522	2.66019	2.11771	4.86336	5.36242	5.11289	0.371714	0.0858544	-0.0110871	0.429272	N	N	0	0	1	1
YNL051W	0.68195	1.11308	0.897516	1.57522	1.47788	1.52655	1.82376	3.21745	2.52061	-0.230669	0.196135	-0.448463	0.0572346	N	N	0	0	1	1
YNL053W	2.04585	1.85514	1.95049	2.36283	0.295577	1.3292	1.5198	1.60873	1.56426	0.166553	0.65529	0.0958346	0.147882	N	N	1	0	0	1
YNL055C	21.8224	20.4065	21.1144	18.9026	14.7788	16.8407	25.8366	31.6383	28.7374	0.0982186	0.261932	-0.133868	0.0588477	N	N	0	2	1	3
YNL061W	4.77365	5.19438	4.98402	0.78761	2.95577	1.87169	4.86336	3.75369	4.30853	0.425346	0.202766	0.0632505	0.120302	N	N	0	0	1	1
YNL065W	9.54729	11.8729	10.7101	7.08849	6.20711	6.6478	12.7663	6.97114	9.86873	0.207115	0.143627	0.0355315	0.347846	N	N	0	1	0	1
YNL066W	8.1834	5.93644	7.05992	3.15044	3.8425	3.49647	5.16732	12.3336	8.75044	0.30517	0.170087	-0.0932304	0.264084	N	N	0	2	1	3
YNL069C	8.1834	4.0813	6.13235	5.51327	7.685	6.59913	18.5416	14.4785	16.51	-0.0318601	0.864184	-0.430122	0.0904135	N	N	1	1	0	2
YNL070W	2.04585	0.742055	1.39395	0.78761	0.591154	0.689382	1.21584	3.21745	2.21665	0.305788	0.472711	-0.201449	0.256779	N	N	0	1	0	1
YNL071W	17.7307	7.04952	12.3901	5.51327	8.8673	7.19029	11.2465	10.1886	10.7176	0.236329	0.502136	0.0629791	0.778513	N	N	0	0	1	1
YNL074C	3.40975	3.33925	3.3745	3.15044	2.36461	2.75753	3.34356	6.97114	5.15735	0.0876893	0.35934	-0.184218	0.206567	N	N	0	0	1	1
YNL077W	7.50145	5.93644	6.71894	7.8761	2.95577	5.41593	4.86336	4.28994	4.57665	0.0936276	0.690713	0.166753	0.200416	N	N	1	0	0	1
YNL079C	5.4556	7.04952	6.25256	3.93805	5.0248	4.48143	4.86336	8.04363	6.45349	0.144641	0.2243	-0.0137372	0.469624	N	N	0	2	0	2
YNL084C	2.04585	0.742055	1.39395	0.78761	1.47788	1.13275	0.91188	6.97114	3.94151	0.0901149	0.766165	-0.451415	0.189134	N	N	1	1	0	2
YNL085W	8.86534	8.1626	8.51397	3.93805	6.50269	5.22037	8.20692	10.1886	9.19776	0.212431	0.217369	-0.0335497	0.205415	N	N	0	1	1	2
YNL087W	7.50145	9.64671	8.57408	1.57522	5.0248	3.30001	7.29504	8.57987	7.93746	0.414672	0.145443	0.0335061	0.819556	N	N	0	1	0	1
YNL088W	9.54729	5.93644	7.74187	3.15044	4.72923	3.93983	4.25544	4.28994	4.27269	0.293368	0.248521	0.258144	0.306125	N	N	0	0	1	1
YNL094W	11.5931	8.53363	10.0634	6.30088	4.72923	5.51505	6.99108	6.4349	6.71299	0.261194	0.158533	0.175828	0.260751	N	N	0	0	1	1
YNL096C	2.04585	1.48411	1.76498	1.57522	1.47788	1.52655	3.95148	2.68121	3.31635	0.063028	0.550059	-0.27392	0.102318	N	N	0	1	0	1
YNL103W	10.9112	4.82336	7.86727	6.30088	2.95577	4.62832	6.0792	6.97114	6.52517	0.230401	0.47272	0.0812323	0.775753	N	N	0	1	0	1
YNL104C	71.6047	70.4952	71.05	45.6814	61.1844	53.4329	73.5583	99.741	86.6497	0.123755	0.262465	-0.0862031	0.18076	N	N	0	2	0	2
YNL116W	2.7278	1.48411	2.10595	1.57522	3.25134	2.41328	2.12772	2.68121	2.40446	-0.0591592	0.798173	-0.0575696	0.608755	N	N	0	1	0	1
YNL118C	10.9112	7.04952	8.98036	2.36283	5.91154	4.13718	8.51088	8.04363	8.27726	0.336589	0.206928	0.0354073	0.744368	N	N	1	0	0	1
YNL123W	9.54729	6.67849	8.11289	5.51327	4.72923	5.12125	6.68712	7.50739	7.09725	0.1998	0.267651	0.0580854	0.672326	N	N	1	0	0	1
YNL125C	6.13755	9.64671	7.89213	3.15044	5.0248	4.08762	3.95148	8.04363	5.99755	0.285723	0.233605	0.11922	0.718308	N	N	1	2	1	4
YNL130C	1.3639	2.22616	1.79503	3.15044	0.88673	2.01859	2.12772	3.75369	2.94071	-0.0509749	0.878387	-0.21438	0.120473	N	N	1	1	0	2
YNL131W	1.3639	1.11308	1.23849	3.15044	1.47788	2.31416	1.82376	1.07248	1.44812	-0.271501	0.417238	-0.0679124	0.932988	N	N	0	0	1	1
YNL137C	2.04585	2.59719	2.32152	0.78761	1.47788	1.13275	1.82376	5.89866	3.86121	0.31164	0.120669	-0.220951	0.222808	N	N	0	1	0	1
YNL145W	0.68195	0.371027	0.526488	0.78761	0.295577	0.541593	0.30396	0.536242	0.420101	-0.0122844	0.964075	0.0980352	0.811182	N	N	0	1	0	1
YNL149C	1.3639	0.742055	1.05298	0.78761	0.88673	0.83717	1.21584	1.60873	1.41228	0.0996052	0.612921	-0.127503	0.365033	N	N	0	0	1	1
YNL156C	4.77365	0.371027	2.57234	3.15044	0.88673	2.01859	4.5594	2.68121	3.62031	0.105281	0.849704	-0.148417	0.837095	N	N	0	1	0	1
YNL160W	25.9141	12.2439	19.079	13.3894	15.9611	14.6753	24.0128	35.9282	29.9705	0.11397	0.634908	-0.196139	0.258915	N	N	0	2	0	2
YNL161W	4.77365	4.45233	4.61299	1.57522	2.36461	1.96992	3.34356	5.36242	4.35299	0.369534	0.061631	0.0251947	0.713808	N	N	0	0	1	1
YNL169C	5.4556	2.96822	4.21191	1.57522	0.591154	1.08319	2.43168	1.60873	2.0202	0.589776	0.20764	0.319084	0.298119	N	N	0	1	1	2
YNL175C	2.04585	0.742055	1.39395	0.78761	0.591154	0.689382	1.21584	2.14497	1.6804	0.305788	0.472711	-0.0811659	0.569013	N	N	0	1	0	1
YNL176C	5.4556	2.22616	3.84088	4.72566	2.06904	3.39735	1.82376	6.4349	4.12933	0.0532907	0.852306	-0.031449	0.549906	N	N	0	1	0	1
YNL180C	2.04585	3.33925	2.69255	2.36283	0.88673	1.62478	2.43168	2.68121	2.55644	0.219369	0.391861	0.0225269	0.927814	N	N	0	2	0	2
YNL182C	2.04585	1.11308	1.57947	1.57522	1.18231	1.37876	2.12772	3.75369	2.94071	0.0590204	0.745455	-0.269942	0.105965	N	N	0	0	1	1
YNL185C	1.3639	1.11308	1.23849	0.78761	0.591154	0.689382	1.21584	0.536242	0.876041	0.254433	0.0809298	0.150368	0.138523	N	N	0	1	1	2
YNL190W	18.4126	10.0177	14.2152	9.45132	7.09384	8.27258	13.6782	9.65235	11.6653	0.235112	0.379624	0.0858575	0.549479	N	N	3	4	1	8
YNL197C	7.50145	7.04952	7.27548	1.57522	2.95577	2.26549	3.34356	4.28994	3.81675	0.506699	0.0640967	0.280168	0.0102237	N	N	1	0	0	1
YNL199C	2.04585	3.33925	2.69255	2.36283	1.77346	2.06815	1.21584	2.68121	1.94852	0.114582	0.504451	0.140457	0.673179	N	N	1	0	0	1
YNL208W	15.0029	13.728	14.3655	10.2389	12.7098	11.4744	20.6693	15.0148	17.842	0.0975906	0.214161	-0.0941249	0.360449	N	N	1	2	0	3
YNL209W	33.4155	23.3747	28.3951	12.6018	26.3063	19.454	47.1138	46.1168	46.6153	0.164234	0.411373	-0.215285	0.172662	N	N	0	1	0	1
YNL220W	3.40975	4.0813	3.74552	6.30088	3.54692	4.9239	4.86336	4.82618	4.84477	-0.118797	0.546174	-0.11176	0.190011	N	N	0	1	0	1
YNL227C	0.68195	0.742055	0.712002	0.78761	0.88673	0.83717	0.30396	0.536242	0.420101	-0.0703324	0.189957	0.229128	0.105068	N	N	0	1	0	1
YNL234W	2.7278	1.85514	2.29147	2.36283	0.591154	1.47699	0.91188	4.28994	2.60091	0.190736	0.522515	-0.0550112	0.38203	N	N	1	0	0	1
YNL239W	8.86534	5.19438	7.02986	2.36283	2.95577	2.6593	3.64752	6.97114	5.30933	0.42218	0.246048	0.121907	0.717593	N	N	1	0	0	1
YNL241C	31.3697	19.6645	25.5171	18.115	15.6656	16.8903	14.5901	17.696	16.143	0.179193	0.371807	0.198846	0.377195	N	N	1	0	1	2
YNL244C	2.7278	0.742055	1.73493	1.57522	1.77346	1.67434	2.73564	2.68121	2.70843	0.0154374	0.961245	-0.193436	0.510733	N	N	0	1	0	1
YNL248C	2.04585	3.33925	2.69255	3.93805	0.88673	2.41239	5.16732	3.75369	4.46051	0.0477159	0.887542	-0.219221	0.230561	N	N	0	0	1	1
YNL249C	2.04585	1.48411	1.76498	1.57522	0.591154	1.08319	1.21584	1.60873	1.41228	0.212036	0.377863	0.0968179	0.525875	N	N	0	1	0	1
YNL253W	1.3639	1.48411	1.424	0.78761	0.295577	0.541593	1.21584	1.60873	1.41228	0.419838	0.156539	0.00358959	0.544567	N	N	0	1	0	1
YNL258C	4.0917	1.85514	2.97342	2.36283	2.06904	2.21593	2.73564	9.11611	5.92588	0.127699	0.62044	-0.299497	0.159184	N	N	1	1	0	2
YNL261W	2.7278	0.742055	1.73493	0.78761	1.18231	0.984958	2.73564	2.68121	2.70843	0.245863	0.586582	-0.193436	0.510733	N	N	0	1	0	1
YNL268W	11.5931	7.79157	9.69236	14.177	9.16288	11.6699	13.3742	13.406	13.3901	-0.0806387	0.597897	-0.140356	0.301714	N	N	1	0	1	2
YNL271C	51.1462	28.1981	39.6722	12.6018	12.1186	12.3602	8.81484	13.9423	11.3786	0.50646	0.253072	0.542398	0.252261	N	N	0	0	1	1
YNL272C	4.77365	1.48411	3.12888	3.15044	4.43365	3.79205	2.43168	3.21745	2.82457	-0.0834849	0.759358	0.044437	0.958377	N	N	0	0	1	1
YNL273W	2.04585	2.22616	2.13601	2.36283	0.591154	1.47699	1.5198	1.60873	1.56426	0.160225	0.592332	0.135293	0.088142	N	N	0	1	0	1
YNL283C	1.3639	0.371027	0.867463	1.57522	0.88673	1.23098	0.30396	1.60873	0.956343	-0.151998	0.614947	-0.0423625	0.566722	N	N	0	0	1	1
YNL287W	12.957	15.9542	14.4556	10.2389	5.91154	8.07523	10.3346	17.1597	13.7472	0.252881	0.151521	0.0218224	0.703914	N	N	0	2	1	3
YNL300W	0.68195	0.742055	0.712002	0.78761	0.88673	0.83717	1.21584	1.07248	1.14416	-0.0703324	0.189957	-0.206006	0.014918	N	N	0	1	2	3
YNL302C	6.8195	4.45233	5.63591	6.30088	7.98057	7.14073	13.6782	9.11611	11.3972	-0.102778	0.418672	-0.305832	0.106832	N	N	0	2	2	4
YNL307C	2.7278	3.71027	3.21904	7.08849	2.36461	4.72655	3.0396	3.75369	3.39665	-0.166819	0.63759	-0.0233246	0.599086	N	N	0	0	1	1
YNL309W	0.68195	1.48411	1.08303	1.57522	0.88673	1.23098	0.91188	1.07248	0.992182	-0.055609	0.806376	0.038049	0.920042	N	N	0	1	0	1
YNL315C	0.68195	1.85514	1.26854	1.57522	0.88673	1.23098	2.12772	2.14497	2.13634	0.013056	0.961997	-0.226366	0.376937	N	N	0	1	0	1
YNL321W	4.0917	5.93644	5.01407	5.51327	2.66019	4.08673	0.91188	5.36242	3.13715	0.0888142	0.647805	0.203655	0.651337	N	N	0	0	1	1
YNL323W	1.3639	2.22616	1.79503	0.78761	2.95577	1.87169	1.5198	1.60873	1.56426	-0.0181615	0.956196	0.0597624	0.713182	N	N	0	1	0	1
YNL327W	26.596	19.2934	22.9447	9.45132	3.8425	6.64691	9.72672	13.9423	11.8345	0.538063	0.078311	0.287533	0.200505	N	N	0	3	2	5
YNR001C	17.0487	9.64671	13.3477	7.8761	5.32038	6.59824	7.29504	11.7973	9.54618	0.305979	0.297394	0.145578	0.599575	N	N	2	3	0	5
YNR019W	5.4556	6.30747	5.88153	7.8761	4.13807	6.00709	7.599	5.89866	6.74883	-0.00917353	0.957585	-0.0597382	0.538906	N	N	0	1	0	1
YNR021W	1.3639	1.11308	1.23849	0.78761	2.66019	1.7239	5.16732	4.82618	4.99675	-0.143619	0.695426	-0.605795	0.00313992	N	N	0	0	1	1
YNR038W	1.3639	1.85514	1.60952	6.30088	0.88673	3.5938	1.82376	2.68121	2.25248	-0.348859	0.596952	-0.145966	0.121501	N	N	0	0	1	1
YNR039C	2.7278	1.48411	2.10595	2.36283	1.18231	1.77257	2.12772	1.60873	1.86822	0.0748459	0.734975	0.0520201	0.659772	N	N	1	0	0	1
YNR041C	3.40975	3.33925	3.3745	2.36283	2.36461	2.36372	1.21584	2.14497	1.6804	0.154613	0.0221105	0.302795	0.0940788	N	N	0	0	1	1
YNR043W	17.0487	10.0177	13.5332	9.45132	7.09384	8.27258	11.8544	14.4785	13.1665	0.213761	0.358393	0.0119319	0.947957	N	N	0	1	0	1
YNR044W	3.40975	5.93644	4.67309	3.93805	2.95577	3.44691	5.16732	11.7973	8.48232	0.132175	0.502224	-0.25891	0.128315	N	N	1	0	2	3
YNR047W	13.639	13.357	13.498	7.08849	5.0248	6.05665	6.68712	8.57987	7.6335	0.348037	0.082845	0.247546	0.0398231	N	N	1	0	0	1
YNR048W	2.04585	1.11308	1.57947	0.78761	0.88673	0.83717	1.82376	2.68121	2.25248	0.275696	0.354768	-0.154152	0.275711	N	N	1	0	0	1
YNR049C	2.04585	1.48411	1.76498	0.78761	0.591154	0.689382	1.5198	3.21745	2.36863	0.40828	0.132561	-0.127757	0.199908	N	N	0	1	0	1
YNR050C	3.40975	3.33925	3.3745	3.93805	2.36461	3.15133	4.25544	4.82618	4.54081	0.0297149	0.824058	-0.128924	0.0560591	N	N	0	1	0	1
YNR051C	4.77365	3.71027	4.24196	2.36283	1.18231	1.77257	3.34356	2.68121	3.01239	0.378964	0.0909999	0.148656	0.208135	N	N	0	1	2	3
YNR053C	80.4701	56.3962	68.4331	29.1416	29.2621	29.2018	34.3475	31.102	32.7248	0.369856	0.189515	0.32039	0.201311	N	N	0	2	2	4
YNR055C	4.77365	3.71027	4.24196	3.93805	1.18231	2.56018	1.82376	1.60873	1.71624	0.219296	0.423309	0.392988	0.126369	N	N	0	0	1	1
YNR066C	7.50145	5.56541	6.53343	1.57522	2.66019	2.11771	2.12772	0.536242	1.33198	0.489276	0.0844002	0.690643	0.0739542	N	N	1	0	0	1
YNR067C	27.9599	11.1308	19.5454	9.45132	7.98057	8.71595	13.3742	17.1597	15.267	0.35073	0.419297	0.107291	0.760063	N	N	1	1	0	2
YNR074C	3.40975	1.85514	2.63244	0.78761	0.591154	0.689382	1.21584	1.60873	1.41228	0.581899	0.237754	0.270437	0.382784	N	N	0	1	0	1
YOL003C	0.68195	1.48411	1.08303	1.57522	0.295577	0.935398	0.91188	1.60873	1.2603	0.0636437	0.866024	-0.0658347	0.537589	N	N	1	0	0	1
YOL004W	35.4614	41.5551	38.5082	22.8407	15.6656	19.2531	16.1099	14.4785	15.2942	0.301052	0.0573232	0.401027	0.0771103	N	N	0	1	0	1
YOL006C	8.1834	4.82336	6.50338	7.08849	4.43365	5.76107	6.0792	5.36242	5.72081	0.0526356	0.763459	0.0556813	0.668843	N	N	0	1	0	1
YOL007C	0.68195	0.742055	0.712002	1.57522	0.295577	0.935398	0.60792	0.536242	0.572081	-0.118515	0.786166	0.0950238	0.0658286	N	N	1	0	0	1
YOL011W	6.13755	7.79157	6.96456	3.93805	2.66019	3.29912	2.73564	5.89866	4.31715	0.324496	0.0792497	0.207697	0.246384	N	N	1	1	0	2
YOL017W	1.3639	0.742055	1.05298	0.78761	1.18231	0.984958	0.91188	1.07248	0.992182	0.029001	0.873165	0.0258275	0.957875	N	N	0	0	1	1
YOL020W	6.13755	5.93644	6.03699	2.36283	3.54692	2.95488	5.16732	6.4349	5.80111	0.310281	0.112676	0.0173094	0.842485	N	N	0	1	0	1
YOL029C	2.04585	1.85514	1.95049	1.57522	1.47788	1.52655	1.21584	1.07248	1.14416	0.106433	0.0922061	0.231657	0.0459644	N	N	0	0	1	1
YOL034W	2.7278	2.59719	2.66249	2.36283	0.88673	1.62478	1.82376	1.07248	1.44812	0.214494	0.392146	0.264484	0.059786	N	N	1	0	0	1
YOL039W	4.0917	1.48411	2.7879	6.30088	3.25134	4.77611	13.3742	9.65235	11.5133	-0.233797	0.428261	-0.615922	0.0483021	N	N	0	3	1	4
YOL040C	8.86534	5.19438	7.02986	10.2389	10.0496	10.1443	9.72672	13.406	11.5664	-0.159274	0.33843	-0.216251	0.159726	N	N	1	1	0	2
YOL045W	7.50145	7.79157	7.64651	5.51327	4.13807	4.82567	5.77524	3.75369	4.76447	0.199905	0.139556	0.205449	0.0750044	N	N	1	0	0	1
YOL052C-A	1.3639	0.371027	0.867463	0.78761	0.295577	0.541593	1.82376	3.21745	2.52061	0.204578	0.634192	-0.463254	0.0934776	N	N	0	1	0	1
YOL058W	12.957	9.64671	11.3019	15.7522	14.7788	15.2655	19.1495	27.3483	23.2489	-0.130561	0.231089	-0.313252	0.0368973	N	N	1	1	0	2
YOL059W	7.50145	4.82336	6.1624	3.15044	1.77346	2.46195	4.25544	9.11611	6.68578	0.398471	0.174181	-0.0354019	0.438583	N	N	0	0	1	1
YOL062C	6.8195	5.19438	6.00694	3.93805	3.8425	3.89027	3.95148	4.82618	4.38883	0.188673	0.23233	0.136305	0.320801	N	N	0	0	1	1
YOL075C	12.2751	9.64671	10.9609	3.93805	5.0248	4.48143	3.95148	8.04363	5.99755	0.38843	0.0904352	0.261872	0.149171	N	N	1	0	0	1
YOL077C	3.40975	0.742055	2.0759	0.78761	0.88673	0.83717	3.0396	4.82618	3.93289	0.394393	0.523404	-0.277505	0.314294	N	N	1	0	0	1
YOL077W-A	1.3639	0.371027	0.867463	0.78761	0.591154	0.689382	0.60792	1.07248	0.840202	0.0997913	0.781229	0.0138674	0.887926	N	N	1	0	0	1
YOL081W	108.43	86.4494	97.4397	25.9911	26.0108	26.0009	20.9732	27.8846	24.4289	0.573747	0.097177	0.600832	0.0907778	N	N	0	1	2	3
YOL086C	91.3812	54.17	72.7756	51.9823	62.0711	57.0267	106.69	101.35	104.02	0.105908	0.549299	-0.15513	0.353171	N	N	1	0	0	1
YOL087C	18.4126	14.4701	16.4414	7.08849	8.57173	7.83011	8.20692	9.65235	8.92964	0.32217	0.110151	0.265104	0.16145	N	N	0	1	0	1
YOL090W	0.68195	1.11308	0.897516	1.57522	1.47788	1.52655	2.12772	4.28994	3.20883	-0.230669	0.196135	-0.553304	0.0846829	N	N	0	0	1	1
YOL098C	5.4556	7.04952	6.25256	4.72566	3.54692	4.13629	5.16732	6.97114	6.06923	0.179447	0.177124	0.012924	0.803848	N	N	0	0	1	1
YOL105C	7.50145	4.82336	6.1624	2.36283	0.591154	1.47699	1.21584	2.68121	1.94852	0.620372	0.117896	0.500044	0.193607	N	N	0	0	1	1
YOL109W	4.0917	0.742055	2.41688	0.78761	1.18231	0.984958	1.21584	4.28994	2.75289	0.389836	0.548722	-0.0565341	0.631125	N	N	2	2	0	4
YOL115W	19.7765	14.8411	17.3088	3.93805	3.8425	3.89027	1.82376	3.75369	2.78873	0.648287	0.115672	0.792861	0.100435	N	N	0	1	0	1
YOL119C	10.9112	5.56541	8.2383	5.51327	4.13807	4.82567	5.16732	8.04363	6.60547	0.23228	0.414186	0.0959337	0.791483	N	N	0	1	0	1
YOL120C	7.50145	4.45233	5.97689	7.08849	7.685	7.38674	15.502	16.0873	15.7946	-0.0919779	0.522002	-0.422034	0.0941175	N	N	1	2	0	3
YOL123W	4.77365	2.22616	3.49991	2.36283	2.06904	2.21593	3.0396	3.75369	3.39665	0.1985	0.496096	0.0130059	0.962514	N	N	0	1	0	1
YOL127W	7.50145	5.56541	6.53343	11.0265	8.8673	9.94692	22.493	26.8121	24.6526	-0.182548	0.144276	-0.576721	0.00592003	N	N	0	1	1	2
YOL136C	6.8195	2.59719	4.70834	8.66371	0.88673	4.77522	6.0792	7.50739	6.79329	-0.0061252	0.98966	-0.159212	0.450201	N	N	0	1	0	1
YOL139C	4.0917	3.71027	3.90099	1.57522	4.72923	3.15222	7.599	8.57987	8.08944	0.0925573	0.717797	-0.316744	0.00614723	N	N	0	1	0	1
YOL154W	0.68195	0.742055	0.712002	0.78761	0.295577	0.541593	0.91188	1.60873	1.2603	0.118808	0.613827	-0.247994	0.141925	N	N	0	2	0	2
YOL155C	117.977	86.0783	102.028	31.5044	29.5577	30.531	26.4445	27.8846	27.1646	0.523977	0.138593	0.574716	0.134104	N	N	0	1	0	1
YOL159C-A	0.68195	0.371027	0.526488	0.78761	0.591154	0.689382	0.60792	1.07248	0.840202	-0.117071	0.483583	-0.202995	0.16725	N	N	0	1	0	1
YOR001W	4.0917	3.71027	3.90099	3.15044	1.77346	2.46195	3.0396	1.07248	2.05604	0.199895	0.266707	0.278142	0.0979637	N	N	1	1	0	2
YOR002W	4.0917	4.0813	4.0865	3.15044	2.66019	2.90532	6.38316	6.97114	6.67715	0.148158	0.130129	-0.21324	0.0339386	N	N	0	0	1	1
YOR007C	10.9112	11.1308	11.021	6.30088	5.0248	5.66284	12.1584	12.8698	12.5141	0.289187	0.0683617	-0.0551785	0.0252899	N	N	0	1	0	1
YOR008C	9.54729	5.19438	7.37084	2.36283	4.43365	3.39824	6.0792	8.57987	7.32954	0.336263	0.287233	0.00244044	0.834578	N	N	0	2	0	2
YOR020C	4.77365	1.85514	3.31439	5.51327	3.25134	4.38231	7.599	3.75369	5.67635	-0.121299	0.624589	-0.233665	0.517994	N	N	0	1	0	1
YOR034C	8.1834	12.6149	10.3992	11.8141	5.32038	8.56727	8.81484	16.6235	12.7192	0.0841562	0.692295	-0.0874604	0.286763	N	N	0	0	1	1
YOR034C-A	0.68195	0.371027	0.526488	0.78761	0.295577	0.541593	0.91188	1.07248	0.992182	-0.0122844	0.964075	-0.275202	0.17168	N	N	1	0	0	1
YOR037W	1.3639	1.11308	1.23849	1.57522	0.88673	1.23098	1.5198	0.536242	1.02802	0.00264347	0.986391	0.0808907	0.280429	N	N	0	1	0	1
YOR063W	41.5989	23.0037	32.3013	29.1416	30.1488	29.6452	43.4663	46.653	45.0597	0.0372658	0.822885	-0.144568	0.381342	N	N	2	2	3	7
YOR065W	2.7278	1.48411	2.10595	0.78761	1.47788	1.13275	1.82376	0.536242	1.18	0.269316	0.334999	0.251566	0.256616	N	N	0	0	1	1
YOR071C	6.8195	2.22616	4.52283	3.15044	1.77346	2.46195	1.5198	1.60873	1.56426	0.264131	0.529675	0.461101	0.42255	N	N	0	0	1	1
YOR073W	0.68195	0.371027	0.526488	2.36283	0.295577	1.3292	1.21584	0.536242	0.876041	-0.402203	0.578523	-0.221136	0.517545	N	N	1	0	0	1
YOR080W	2.04585	2.96822	2.50703	1.57522	1.77346	1.67434	3.0396	3.21745	3.12853	0.175316	0.311987	-0.0961796	0.383849	N	N	0	0	1	1
YOR081C	3.40975	4.0813	3.74552	3.93805	3.25134	3.5947	2.73564	2.68121	2.70843	0.0178504	0.783219	0.140796	0.196411	N	N	0	1	0	1
YOR085W	4.0917	2.59719	3.34444	1.57522	2.06904	1.82213	4.86336	5.89866	5.38101	0.263745	0.267897	-0.20654	0.171192	N	N	0	2	0	2
YOR086C	14.3209	13.728	14.0245	8.66371	7.685	8.17435	9.72672	11.2611	10.4939	0.234433	0.01747	0.12595	0.0266849	N	N	0	1	2	3
YOR087W	1.3639	1.11308	1.23849	1.57522	0.88673	1.23098	1.82376	3.75369	2.78873	0.00264347	0.986391	-0.352513	0.130044	N	N	0	1	0	1
YOR099W	6.13755	6.30747	6.22251	7.08849	5.32038	6.20444	9.42276	14.4785	11.9506	0.00126304	0.987003	-0.283426	0.11253	N	N	0	2	1	3
YOR101W	0.68195	0.742055	0.712002	0.78761	0.591154	0.689382	1.5198	2.14497	1.83238	0.0140215	0.857493	-0.410535	0.0687408	N	N	0	0	1	1
YOR108W	6.8195	7.04952	6.93451	5.51327	3.25134	4.38231	4.5594	5.36242	4.96091	0.199313	0.26273	0.145454	0.0303288	N	N	1	0	2	3
YOR113W	5.4556	2.59719	4.02639	0.78761	1.47788	1.13275	2.73564	4.28994	3.51279	0.550783	0.278598	0.0592644	0.945002	N	N	0	1	0	1
YOR122C	3.40975	2.22616	2.81796	6.30088	3.54692	4.9239	5.47128	5.89866	5.68497	-0.242375	0.34576	-0.304794	0.11585	N	N	0	1	1	2
YOR124C	12.957	15.5831	14.2701	7.08849	5.61596	6.35222	7.29504	8.57987	7.93746	0.351501	0.0556417	0.254746	0.120618	N	N	0	3	1	4
YOR133W	53.874	44.1523	49.0131	37.0177	37.2427	37.1302	69.6069	78.2913	73.9491	0.120586	0.247042	-0.17862	0.0734788	N	N	0	2	1	3
YOR136W	7.50145	4.45233	5.97689	6.30088	5.32038	5.81063	9.42276	12.8698	11.1463	0.0122518	0.931863	-0.270655	0.10343	N	N	0	2	0	2
YOR137C	7.50145	4.0813	5.79137	2.36283	2.95577	2.6593	2.73564	3.75369	3.24467	0.338014	0.311311	0.251611	0.40442	N	N	1	0	1	2
YOR142W	2.7278	3.33925	3.03352	0.78761	1.47788	1.13275	3.0396	4.28994	3.66477	0.427814	0.0554541	-0.0820993	0.163591	N	N	0	0	1	1
YOR151C	34.0975	26.3429	30.2202	7.08849	10.6408	8.86463	11.8544	15.0148	13.4346	0.532637	0.0734546	0.352073	0.139525	N	N	0	0	1	1
YOR160W	2.7278	3.33925	3.03352	4.72566	2.06904	3.39735	3.0396	4.28994	3.66477	-0.0491929	0.830622	-0.0820993	0.163591	N	N	0	1	0	1
YOR161C	4.0917	1.85514	2.97342	0.78761	1.18231	0.984958	1.21584	1.07248	1.14416	0.479838	0.319246	0.414768	0.343617	N	N	1	0	0	1
YOR167C	2.04585	1.85514	1.95049	2.36283	3.25134	2.80709	3.34356	6.4349	4.88923	-0.158112	0.294043	-0.399096	0.126201	N	N	1	1	0	2
YOR176W	4.0917	2.96822	3.52996	3.15044	3.54692	3.34868	5.77524	4.82618	5.30071	0.0228959	0.803855	-0.176564	0.186095	N	N	0	1	0	1
YOR182C	4.77365	1.11308	2.94336	4.72566	4.13807	4.43187	5.47128	6.97114	6.22121	-0.177743	0.563895	-0.325031	0.285765	N	N	0	1	0	1
YOR185C	2.04585	1.48411	1.76498	2.36283	0.88673	1.62478	2.43168	2.14497	2.28832	0.035945	0.882945	-0.112778	0.342177	N	N	0	2	0	2
YOR186W	0.68195	0.742055	0.712002	0.78761	0.295577	0.541593	0.30396	0.536242	0.420101	0.118808	0.613827	0.229128	0.105068	N	N	0	0	1	1
YOR187W	8.1834	4.45233	6.31786	7.08849	3.54692	5.31771	6.68712	5.89866	6.29289	0.0748459	0.734975	0.00171991	0.924659	N	N	0	1	0	1
YOR195W	2.7278	1.48411	2.10595	0.78761	0.88673	0.83717	2.12772	2.14497	2.13634	0.400635	0.28846	-0.00622231	0.964511	N	N	0	1	0	1
YOR198C	6.13755	4.0813	5.10942	4.72566	2.36461	3.54514	7.599	7.50739	7.55319	0.158739	0.424631	-0.169759	0.255532	N	N	0	2	1	3
YOR204W	23.1863	14.099	18.6427	21.2655	17.7346	19.5	30.396	37.0007	33.6983	-0.0195275	0.883842	-0.257101	0.137181	N	N	0	1	2	3
YOR208W	4.77365	4.82336	4.7985	3.93805	3.25134	3.5947	3.64752	3.75369	3.70061	0.125443	0.175267	0.112833	0.00117732	N	N	0	1	0	1
YOR211C	4.77365	3.71027	4.24196	3.93805	3.54692	3.74249	4.25544	5.36242	4.80893	0.0544065	0.513499	-0.0544818	0.330543	N	N	0	0	1	1
YOR220W	3.40975	2.22616	2.81796	0.78761	3.8425	2.31505	2.73564	6.4349	4.58527	0.0853731	0.800892	-0.211431	0.155306	N	N	0	1	0	1
YOR227W	12.2751	11.5018	11.8885	7.08849	7.09384	7.09117	6.0792	9.11611	7.59766	0.224408	0.0511853	0.194446	0.086668	N	N	0	1	2	3
YOR229W	2.04585	2.59719	2.32152	0.78761	2.06904	1.42832	3.0396	1.60873	2.32416	0.210946	0.376584	-0.000494141	0.518678	N	N	0	0	1	1
YOR241W	3.40975	1.48411	2.44693	2.36283	1.77346	2.06815	3.34356	1.60873	2.47614	0.0730403	0.76296	-0.00515442	0.752055	N	N	0	1	0	1
YOR260W	4.77365	2.96822	3.87093	4.72566	3.54692	4.13629	2.73564	6.97114	4.85339	-0.0287954	0.831749	-0.0982298	0.282979	N	N	0	1	0	1
YOR267C	19.0946	9.64671	14.3707	5.51327	6.50269	6.00798	10.3346	8.57987	9.45726	0.378748	0.324814	0.181711	0.459239	N	N	0	2	2	4
YOR270C	30.0058	19.2934	24.6496	16.5398	12.7098	14.6248	24.9247	20.3772	22.651	0.22672	0.288798	0.0367233	0.662432	N	N	0	2	2	4
YOR272W	0.68195	0.742055	0.712002	0.78761	0.295577	0.541593	2.12772	1.60873	1.86822	0.118808	0.613827	-0.418947	0.0675588	N	N	0	0	1	1
YOR273C	27.278	18.1803	22.7292	13.3894	11.5275	12.4584	16.1099	20.3772	18.2435	0.26112	0.254718	0.0954744	0.587771	N	N	0	2	2	4
YOR275C	3.40975	4.45233	3.93104	2.36283	1.77346	2.06815	3.34356	5.89866	4.62111	0.278926	0.119625	-0.0702391	0.253224	N	N	0	0	1	1
YOR276W	0.68195	0.742055	0.712002	0.78761	0.591154	0.689382	0.91188	1.60873	1.2603	0.0140215	0.857493	-0.247994	0.141925	N	N	0	0	1	1
YOR285W	5.4556	3.33925	4.39742	7.8761	5.0248	6.45045	8.81484	8.57987	8.69736	-0.166392	0.375401	-0.296189	0.154706	N	N	0	1	0	1
YOR293W	4.77365	2.96822	3.87093	4.72566	3.54692	4.13629	8.51088	13.9423	11.2266	-0.0287954	0.831749	-0.462432	0.0445197	N	N	1	1	0	2
YOR294W	0.68195	0.371027	0.526488	2.36283	0.88673	1.62478	1.21584	3.75369	2.48477	-0.489406	0.368813	-0.673897	0.136216	N	N	0	0	2	2
YOR298C-A	13.639	5.93644	9.78772	11.0265	7.09384	9.06019	12.1584	18.7685	15.4634	0.033544	0.886369	-0.198625	0.277902	N	N	1	0	0	1
YOR303W	32.0516	35.6186	33.8351	22.0531	20.6904	21.3717	26.4445	45.5806	36.0125	0.199528	0.0610092	-0.027086	0.365036	N	N	0	1	0	1
YOR304W	9.54729	6.30747	7.92738	2.36283	6.50269	4.43276	6.99108	3.75369	5.37239	0.252456	0.32143	0.168962	0.247704	N	N	0	0	1	1
YOR306C	10.9112	12.6149	11.7631	10.2389	10.3452	10.2921	17.6297	19.841	18.7353	0.0580182	0.333277	-0.202141	0.0265925	N	N	0	0	1	1
YOR310C	5.4556	4.0813	4.76845	5.51327	5.0248	5.26904	6.38316	8.04363	7.21339	-0.0433541	0.59746	-0.179763	0.093241	N	N	0	1	0	1
YOR312C	8.1834	7.79157	7.98748	4.72566	6.79827	5.76196	18.2376	24.6671	21.4524	0.14184	0.268432	-0.429065	0.0641347	N	N	0	0	1	1
YOR321W	12.957	12.6149	12.786	3.93805	8.57173	6.25489	9.72672	11.2611	10.4939	0.310515	0.215388	0.0857973	0.0855819	N	N	0	1	0	1
YOR328W	16.3668	10.3888	13.3778	6.30088	5.61596	5.95842	6.99108	5.89866	6.44487	0.351253	0.240094	0.31717	0.247957	N	N	0	0	1	1
YOR329C	8.86534	5.19438	7.02986	3.93805	3.54692	3.74249	2.73564	4.28994	3.51279	0.273787	0.321534	0.301295	0.328544	N	N	0	0	1	1
YOR335C	28.6419	16.3252	22.4835	10.2389	10.9363	10.5876	20.9732	26.2759	23.6245	0.327066	0.303302	-0.0214988	0.757986	N	N	1	0	0	1
YOR336W	12.957	9.27568	11.1164	6.30088	6.79827	6.54957	7.29504	8.57987	7.93746	0.22975	0.238801	0.146281	0.3584	N	N	0	0	1	1
YOR341W	51.1462	37.8448	44.4955	13.3894	15.0744	14.2319	17.0218	20.3772	18.6995	0.495054	0.132947	0.376487	0.160992	N	N	2	2	1	5
YOR344C	5.4556	4.45233	4.95396	3.15044	2.06904	2.60974	6.68712	10.1886	8.43786	0.278356	0.0869851	-0.23128	0.0731424	N	N	0	1	0	1
YOR350C	2.04585	2.22616	2.13601	2.36283	0.591154	1.47699	2.43168	2.68121	2.55644	0.160225	0.592332	-0.0780339	0.0589456	N	N	0	1	2	3
YOR355W	8.1834	3.33925	5.76132	3.93805	2.36461	3.15133	8.20692	8.57987	8.3934	0.262028	0.467609	-0.163416	0.462344	N	N	0	1	0	1
YOR361C	9.54729	4.0813	6.8143	8.66371	5.91154	7.28762	6.0792	14.4785	10.2789	-0.0291647	0.895523	-0.178524	0.255817	N	N	0	1	1	2
YOR367W	0.68195	1.85514	1.26854	0.78761	1.18231	0.984958	1.21584	1.07248	1.14416	0.109887	0.71487	0.0448177	0.8303	N	N	0	0	1	1
YOR369C	10.9112	9.64671	10.279	7.08849	9.16288	8.12568	24.6208	33.7832	29.202	0.102089	0.24386	-0.453464	0.0527967	N	N	2	0	0	2
YOR370C	11.5931	6.30747	8.9503	4.72566	4.43365	4.57966	6.0792	9.65235	7.86578	0.291005	0.345552	0.0560961	0.954794	N	N	0	1	0	1
YOR373W	2.7278	1.85514	2.29147	0.78761	0.88673	0.83717	1.21584	2.14497	1.6804	0.4373	0.18166	0.1347	0.544271	N	N	1	0	0	1
YOR374W	10.2292	6.30747	8.26835	2.36283	3.8425	3.10266	3.34356	3.21745	3.28051	0.425684	0.199243	0.401478	0.237022	N	N	0	1	1	2
YOR377W	8.1834	5.93644	7.05992	6.30088	6.79827	6.54957	9.1188	12.8698	10.9943	0.0325866	0.72892	-0.192368	0.0830613	N	N	0	0	1	1
YOR384W	9.54729	7.04952	8.29841	0.78761	3.54692	2.16727	3.64752	2.14497	2.89624	0.583083	0.0821552	0.45716	0.112377	N	N	0	0	1	1
YOR386W	4.77365	2.59719	3.68542	1.57522	1.47788	1.52655	2.12772	3.21745	2.67259	0.382775	0.296723	0.139555	0.618395	N	N	0	1	1	2
YPL004C	4.77365	6.30747	5.54056	3.15044	0.591154	1.8708	1.82376	3.21745	2.52061	0.471527	0.160222	0.342048	0.134826	N	N	0	1	1	2
YPL010W	1.3639	1.85514	1.60952	1.57522	1.47788	1.52655	2.43168	3.21745	2.82457	0.0229843	0.793149	-0.244256	0.0504022	N	N	1	0	0	1
YPL016W	2.7278	5.56541	4.1466	2.36283	2.66019	2.51151	3.0396	10.7248	6.88222	0.217758	0.453523	-0.220036	0.201401	N	N	0	2	1	3
YPL019C	5.4556	4.0813	4.76845	1.57522	2.95577	2.26549	6.68712	7.50739	7.09725	0.323214	0.123905	-0.172713	0.145244	N	N	0	1	0	1
YPL028W	16.3668	12.6149	14.4909	14.177	9.45846	11.8177	34.6514	24.6671	29.6593	0.0885606	0.472774	-0.311067	0.0629963	N	N	1	1	0	2
YPL032C	15.6848	8.1626	11.9237	10.2389	3.54692	6.89293	6.99108	13.9423	10.4667	0.238008	0.424116	0.0566027	0.954307	N	N	0	1	0	1
YPL037C	4.77365	4.0813	4.42747	7.08849	4.43365	5.76107	10.6386	9.65235	10.1455	-0.114347	0.493021	-0.360116	0.00870185	N	N	0	1	0	1
YPL040C	7.50145	5.19438	6.34791	3.15044	1.47788	2.31416	3.0396	8.04363	5.54161	0.438237	0.116813	0.0589947	0.818425	N	N	0	0	1	1
YPL048W	9.54729	6.67849	8.11289	9.45132	5.61596	7.53364	5.77524	11.2611	8.51816	0.032171	0.832987	-0.02117	0.465276	N	N	0	1	1	2
YPL054W	0.68195	1.48411	1.08303	3.15044	1.18231	2.16637	0.91188	2.14497	1.52842	-0.301093	0.45847	-0.149604	0.282483	N	N	0	0	1	1
YPL058C	16.3668	11.5018	13.9343	6.30088	4.72923	5.51505	8.20692	5.36242	6.78467	0.402536	0.152537	0.312557	0.168656	N	N	0	3	0	3
YPL066W	4.0917	2.59719	3.34444	1.57522	2.06904	1.82213	3.64752	3.75369	3.70061	0.263745	0.267897	-0.043949	0.698666	N	N	0	0	1	1
YPL075W	13.639	10.0177	11.8284	3.93805	5.61596	4.777	7.599	3.75369	5.67635	0.393769	0.115779	0.318856	0.107435	N	N	0	1	0	1
YPL078C	4.77365	1.48411	3.12888	2.36283	0.88673	1.62478	4.25544	5.36242	4.80893	0.284594	0.523221	-0.18666	0.441211	N	N	0	1	0	1
YPL082C	36.1433	42.2971	39.2202	14.9646	13.0054	13.985	10.0307	13.9423	11.9865	0.447848	0.0563199	0.514818	0.0537901	N	N	0	0	1	1
YPL085W	83.1979	62.7036	72.9507	23.6283	16.2567	19.9425	12.7663	10.7248	11.7456	0.56325	0.0916233	0.793155	0.104036	N	N	0	0	3	3
YPL089C	11.5931	7.79157	9.69236	5.51327	2.95577	4.23452	4.5594	8.57987	6.56964	0.359625	0.157675	0.168888	0.455312	N	N	0	0	2	2
YPL090C	8.1834	8.53363	8.35851	9.45132	6.79827	8.12479	18.2376	16.0873	17.1624	0.0123167	0.889169	-0.31245	0.0261261	N	N	0	0	1	1
YPL091W	7.50145	6.67849	7.08997	5.51327	5.61596	5.56461	4.86336	6.4349	5.64913	0.105209	0.163034	0.0986626	0.207083	N	N	0	1	0	1
YPL095C	33.4155	22.6327	28.0241	27.5663	24.2373	25.9018	58.6643	63.2765	60.9704	0.0342014	0.762877	-0.337587	0.0880316	N	N	0	1	0	1
YPL106C	62.7394	55.2831	59.0112	44.1062	48.179	46.1426	70.2148	77.2188	73.7168	0.106833	0.127162	-0.0966319	0.0974353	N	N	0	0	2	2
YPL112C	2.7278	1.48411	2.10595	2.36283	1.47788	1.92036	3.0396	3.21745	3.12853	0.0400669	0.832656	-0.171891	0.334753	N	N	0	2	0	2
YPL115C	7.50145	8.1626	7.83202	2.36283	5.91154	4.13718	4.86336	9.11611	6.98974	0.277169	0.27642	0.0494132	0.871141	N	N	0	2	0	2
YPL117C	6.8195	2.59719	4.70834	3.15044	1.77346	2.46195	7.29504	10.1886	8.74182	0.281589	0.471847	-0.268734	0.240371	N	N	1	0	0	1
YPL126W	17.0487	9.27568	13.1622	5.51327	4.13807	4.82567	8.51088	9.65235	9.08162	0.435771	0.269773	0.161166	0.507036	N	N	0	1	0	1
YPL127C	1.3639	0.371027	0.867463	1.57522	0.591154	1.08319	0.60792	2.68121	1.64456	-0.0964522	0.786783	-0.2778	0.213079	N	N	0	1	0	1
YPL128C	2.04585	1.48411	1.76498	3.15044	0.88673	2.01859	1.5198	1.60873	1.56426	-0.0583075	0.860603	0.0524298	0.639451	N	N	0	0	1	1
YPL131W	21.8224	14.4701	18.1462	7.8761	15.37	11.623	26.1406	34.8557	30.4981	0.193466	0.33995	-0.225487	0.10151	N	N	2	1	2	5
YPL135W	4.0917	1.85514	2.97342	2.36283	1.18231	1.77257	6.68712	7.50739	7.09725	0.224653	0.468547	-0.377834	0.151136	N	N	1	2	1	4
YPL141C	4.0917	3.33925	3.71547	2.36283	2.06904	2.21593	2.12772	3.75369	2.94071	0.224457	0.121213	0.101562	0.574882	N	N	0	1	0	1
YPL145C	5.4556	6.30747	5.88153	3.93805	2.36461	3.15133	6.99108	8.04363	7.51735	0.270996	0.126629	-0.106575	0.0831577	N	N	1	1	4	6
YPL154C	18.4126	15.9542	17.1834	13.3894	15.9611	14.6753	24.6208	32.1745	28.3976	0.0685236	0.294198	-0.218173	0.0396809	N	N	0	4	0	4
YPL156C	4.77365	0.742055	2.75785	2.36283	2.36461	2.36372	5.47128	4.82618	5.14873	0.0669744	0.877079	-0.271129	0.46716	N	N	1	0	0	1
YPL159C	4.0917	1.48411	2.7879	1.57522	2.06904	1.82213	2.73564	3.75369	3.24467	0.184699	0.592757	-0.0658924	0.681885	N	N	0	0	1	1
YPL160W	66.1491	65.3008	65.725	33.0796	24.2373	28.6585	35.5633	42.3631	38.9632	0.360478	0.0732671	0.227076	0.0328682	N	N	0	1	0	1
YPL179W	9.54729	6.30747	7.92738	14.177	8.57173	11.3744	13.0703	23.5946	18.3325	-0.156797	0.421257	-0.364091	0.0707323	N	N	2	0	0	2
YPL183C	5.4556	6.67849	6.06704	3.93805	2.36461	3.15133	7.29504	4.28994	5.79249	0.284483	0.106725	0.020112	0.404467	N	N	0	1	0	1
YPL184C	6.13755	4.0813	5.10942	3.93805	2.66019	3.29912	5.47128	4.82618	5.14873	0.189974	0.295987	-0.00332812	0.925038	N	N	0	2	1	3
YPL188W	4.0917	1.48411	2.7879	3.93805	2.06904	3.00354	2.43168	3.21745	2.82457	-0.0323562	0.90648	-0.00567397	0.887631	N	N	0	0	1	1
YPL190C	10.2292	7.42055	8.8249	3.93805	3.8425	3.89027	8.51088	6.4349	7.47289	0.355729	0.17615	0.0722209	0.394315	N	N	0	1	0	1
YPL195W	8.1834	3.71027	5.94683	3.15044	2.06904	2.60974	5.16732	5.36242	5.26487	0.357689	0.365885	0.0528982	0.824369	N	N	0	0	1	1
YPL198W	2.04585	1.11308	1.57947	1.57522	0.591154	1.08319	2.12772	3.75369	2.94071	0.163807	0.540497	-0.269942	0.105965	N	N	0	3	2	5
YPL202C	2.04585	2.59719	2.32152	3.15044	0.591154	1.8708	2.43168	2.68121	2.55644	0.0937459	0.785038	-0.041864	0.470758	N	N	0	1	0	1
YPL206C	6.13755	2.59719	4.36737	1.57522	2.36461	1.96992	5.47128	1.07248	3.27188	0.345772	0.397261	0.125422	0.42057	N	N	0	1	0	1
YPL212C	5.4556	3.71027	4.58294	3.93805	5.91154	4.92479	9.1188	4.28994	6.70437	-0.0312442	0.819826	-0.165214	0.607203	N	N	0	1	0	1
YPL216W	4.0917	1.48411	2.7879	1.57522	2.06904	1.82213	2.12772	2.14497	2.13634	0.184699	0.592757	0.115607	0.706651	N	N	0	1	0	1
YPL217C	17.7307	14.099	15.9149	2.36283	4.13807	3.25045	5.16732	9.65235	7.40984	0.689859	0.0504162	0.331994	0.0957318	N	N	0	1	0	1
YPL218W	4.77365	1.85514	3.31439	3.93805	3.8425	3.89027	8.81484	10.7248	9.76984	-0.0695763	0.760715	-0.469484	0.10568	N	N	1	1	0	2
YPL221W	31.3697	41.9261	36.6479	21.2655	20.9859	21.1257	16.7178	18.7685	17.7431	0.239238	0.208456	0.315019	0.175035	N	N	0	2	0	2
YPL224C	2.04585	2.59719	2.32152	0.78761	2.36461	1.57611	0.60792	2.14497	1.37644	0.168185	0.511522	0.227014	0.367914	N	N	1	0	0	1
YPL226W	49.1004	41.5551	45.3277	20.4779	16.8479	18.6629	29.4841	27.8846	28.6844	0.385386	0.0501722	0.198719	0.135311	N	N	2	2	1	5
YPL229W	0.68195	0.742055	0.712002	0.78761	0.295577	0.541593	1.21584	1.60873	1.41228	0.118808	0.613827	-0.29744	0.0581889	N	N	0	1	0	1
YPL234C	3.40975	1.11308	2.26142	1.57522	1.77346	1.67434	2.73564	4.28994	3.51279	0.130537	0.699091	-0.191272	0.373167	N	N	1	0	0	1
YPL235W	3.40975	2.96822	3.18898	1.57522	1.47788	1.52655	3.64752	3.75369	3.70061	0.319941	0.0723729	-0.0646207	0.243773	N	N	1	0	1	2
YPL237W	4.77365	3.71027	4.24196	3.15044	1.77346	2.46195	4.25544	4.28994	4.27269	0.236287	0.185439	-0.00313457	0.95297	N	N	0	0	1	1
YPL242C	6.13755	3.33925	4.7384	0.78761	1.18231	0.984958	3.64752	2.68121	3.16437	0.682213	0.221448	0.175345	0.413432	N	N	0	1	0	1
YPL243W	5.4556	1.48411	3.46985	3.15044	3.25134	3.20089	9.72672	3.75369	6.74021	0.0350401	0.9143	-0.288362	0.553594	N	N	0	1	0	1
YPL247C	9.54729	4.0813	6.8143	1.57522	2.95577	2.26549	2.12772	1.07248	1.6001	0.478258	0.332181	0.629273	0.292231	N	N	0	1	0	1
YPL250C	4.0917	4.0813	4.0865	10.2389	8.8673	9.55312	13.3742	16.6235	14.9989	-0.368794	0.0794369	-0.564707	0.0440281	N	N	0	0	1	1
YPL262W	6.8195	5.19438	6.00694	0.78761	2.95577	1.87169	6.0792	4.28994	5.18457	0.50642	0.101636	0.0639407	0.335526	N	N	0	1	0	1
YPL263C	3.40975	4.82336	4.11655	4.72566	1.77346	3.24956	2.73564	8.57987	5.65776	0.102709	0.666537	-0.138111	0.251756	N	N	1	0	0	1
YPL270W	4.77365	6.67849	5.72607	8.66371	5.61596	7.13983	6.0792	4.28994	5.18457	-0.0958315	0.527178	0.0431441	0.479131	N	N	0	1	0	1
YPL271W	1.3639	1.11308	1.23849	0.78761	1.47788	1.13275	1.82376	3.21745	2.52061	0.0387599	0.813515	-0.308612	0.103362	N	N	0	2	0	2
YPL273W	4.0917	2.96822	3.52996	3.15044	2.95577	3.0531	4.86336	7.50739	6.18537	0.063028	0.550059	-0.243596	0.0646698	N	N	0	0	2	2
YPL274W	12.2751	7.42055	9.84782	3.93805	6.79827	5.36816	10.3346	8.57987	9.45726	0.263515	0.280348	0.017575	0.790833	N	N	1	1	2	4
YPR004C	5.4556	2.59719	4.02639	6.30088	1.77346	4.03717	3.34356	6.97114	5.15735	-0.00116075	0.997212	-0.107511	0.37019	N	N	0	0	1	1
YPR010C-A	0.68195	0.742055	0.712002	0.78761	0.591154	0.689382	0.30396	0.536242	0.420101	0.0140215	0.857493	0.229128	0.105068	N	N	0	1	0	1
YPR016C	3.40975	2.59719	3.00347	4.72566	2.66019	3.69293	5.16732	3.75369	4.46051	-0.0897472	0.625357	-0.171761	0.179366	N	N	0	1	0	1
YPR018W	2.7278	0.742055	1.73493	0.78761	0.88673	0.83717	1.21584	0.536242	0.876041	0.316467	0.531793	0.296757	0.485713	N	N	0	1	0	1
YPR019W	5.4556	3.71027	4.58294	3.15044	2.36461	2.75753	3.34356	3.21745	3.28051	0.220624	0.249273	0.145203	0.368536	N	N	0	0	1	1
YPR021C	3.40975	2.22616	2.81796	3.15044	1.18231	2.16637	1.21584	1.60873	1.41228	0.114201	0.63832	0.300013	0.263416	N	N	1	0	0	1
YPR028W	4.77365	3.71027	4.24196	1.57522	4.72923	3.15222	8.81484	12.3336	10.5742	0.12895	0.613848	-0.396681	0.0322542	N	N	1	1	0	2
YPR035W	13.639	10.0177	11.8284	13.3894	14.4833	13.9363	22.797	23.5946	23.1958	-0.0712232	0.442401	-0.292485	0.0955036	N	N	0	3	0	3
YPR036W	13.639	10.3888	12.0139	13.3894	9.75403	11.5717	15.8059	19.3047	17.5553	0.0162861	0.872989	-0.164725	0.106028	N	N	0	0	1	1
YPR036W-A	21.8224	10.3888	16.1056	14.9646	10.9363	12.9505	35.8673	37.5369	36.7021	0.0946909	0.680079	-0.357715	0.167455	N	N	0	0	1	1
YPR041W	3.40975	4.0813	3.74552	2.36283	1.47788	1.92036	5.16732	4.82618	4.99675	0.290131	0.0893912	-0.125175	0.1608	N	N	0	2	0	2
YPR047W	1.3639	1.11308	1.23849	2.36283	0.591154	1.47699	1.5198	2.68121	2.1005	-0.0764853	0.83283	-0.229431	0.116649	N	N	0	1	0	1
YPR052C	1.3639	0.371027	0.867463	2.36283	0.88673	1.62478	1.5198	1.60873	1.56426	-0.272543	0.494972	-0.256059	0.384305	N	N	0	1	0	1
YPR060C	0.68195	0.371027	0.526488	0.78761	1.18231	0.984958	1.82376	2.14497	1.98436	-0.272029	0.216433	-0.576232	0.0287293	N	N	1	0	1	2
YPR068C	2.7278	0.371027	1.54941	1.57522	0.295577	0.935398	1.5198	1.60873	1.56426	0.219171	0.703236	-0.0041426	0.979974	N	N	0	1	0	1
YPR072W	0.68195	2.22616	1.45406	0.78761	1.18231	0.984958	1.82376	2.68121	2.25248	0.169163	0.651903	-0.19008	0.404304	N	N	0	1	0	1
YPR079W	2.7278	1.11308	1.92044	1.57522	0.591154	1.08319	1.21584	1.60873	1.41228	0.248697	0.48564	0.133479	0.70084	N	N	0	1	0	1
YPR080W	122.069	82.7391	102.404	94.5132	101.678	98.0958	154.412	168.38	161.396	0.0186667	0.863141	-0.197575	0.184952	N	N	2	3	1	6
YPR089W	4.0917	3.71027	3.90099	2.36283	2.06904	2.21593	4.5594	10.1886	7.374	0.245618	0.023344	-0.276529	0.173216	N	N	1	0	0	1
YPR097W	13.639	8.53363	11.0863	3.15044	5.0248	4.08762	5.77524	5.89866	5.83695	0.433316	0.191723	0.278601	0.289584	N	N	0	1	1	2
YPR102C	8.1834	5.56541	6.8744	4.72566	5.91154	5.3186	9.1188	9.11611	9.11746	0.111438	0.431253	-0.122639	0.336381	N	N	1	1	0	2
YPR103W	2.7278	2.59719	2.66249	2.36283	2.06904	2.21593	2.43168	6.4349	4.43329	0.0797321	0.161127	-0.221438	0.219333	N	N	0	1	2	3
YPR113W	2.04585	5.19438	3.62012	1.57522	3.8425	2.70886	6.68712	6.4349	6.56101	0.125936	0.688823	-0.258248	0.318278	N	N	0	0	3	3
YPR114W	12.957	8.53363	10.7453	8.66371	6.20711	7.43541	8.20692	14.4785	11.3427	0.159915	0.350429	-0.0234975	0.516063	N	N	0	1	0	1
YPR124W	2.7278	1.48411	2.10595	2.36283	2.36461	2.36372	3.34356	1.60873	2.47614	-0.0501475	0.749833	-0.0703269	0.941655	N	N	1	0	0	1
YPR127W	2.7278	0.742055	1.73493	0.78761	0.591154	0.689382	2.12772	0.536242	1.33198	0.400821	0.482446	0.114783	0.564972	N	N	0	1	0	1
YPR132W	4.77365	7.42055	6.0971	7.08849	7.685	7.38674	8.20692	10.1886	9.19776	-0.0833298	0.504127	-0.178559	0.192781	N	N	0	0	1	1
YPR144C	0.68195	1.11308	0.897516	0.78761	0.88673	0.83717	1.21584	1.60873	1.41228	0.0302284	0.82705	-0.19688	0.173611	N	N	0	0	1	1
YPR149W	3.40975	2.22616	2.81796	1.57522	2.06904	1.82213	4.86336	4.28994	4.57665	0.189355	0.315912	-0.210613	0.207907	N	N	1	4	2	7
YPR156C	10.2292	7.79157	9.01041	11.8141	8.57173	10.1929	13.3742	13.406	13.3901	-0.0535548	0.622806	-0.172041	0.172481	N	N	0	2	3	5
YPR159W	10.2292	12.986	11.6076	4.72566	7.38942	6.05754	9.72672	11.2611	10.4939	0.282446	0.101579	0.0438055	0.690212	N	N	0	1	1	2
YPR160W	60.6935	28.5691	44.6313	15.7522	16.8479	16.3	21.2772	27.8846	24.5809	0.437451	0.328067	0.259042	0.455507	N	N	0	0	1	1
YPR164W	32.0516	23.3747	27.7132	11.0265	9.75403	10.3903	9.72672	8.04363	8.88518	0.426059	0.149816	0.49402	0.138287	N	N	0	2	1	3
YPR165W	6.13755	5.19438	5.66596	7.8761	2.36461	5.12036	7.29504	6.4349	6.86497	0.0439737	0.875933	-0.0833649	0.249504	N	N	0	1	0	1
YPR169W-A	1.3639	0.371027	0.867463	1.57522	0.591154	1.08319	0.91188	1.07248	0.992182	-0.0964522	0.786783	-0.0583402	0.795938	N	N	0	2	0	2
YPR173C	8.86534	5.56541	7.21538	4.72566	3.25134	3.9885	3.95148	3.75369	3.85259	0.257449	0.268576	0.272507	0.286493	N	N	0	1	0	1
YPR180W	1.3639	1.11308	1.23849	1.57522	0.295577	0.935398	1.82376	2.14497	1.98436	0.121896	0.718515	-0.204729	0.0437468	N	N	1	0	0	1
YPR181C	19.7765	18.9224	19.3495	13.3894	9.75403	11.5717	11.5505	14.4785	13.0145	0.223272	0.130849	0.172241	0.037236	N	N	0	2	1	3
YPR185W	5.4556	6.67849	6.06704	2.36283	3.25134	2.80709	2.73564	3.21745	2.97655	0.334721	0.0583778	0.309265	0.118361	N	N	0	0	1	1
YPR189W	11.5931	6.30747	8.9503	3.15044	5.32038	4.23541	6.68712	8.04363	7.36537	0.324942	0.298452	0.0846429	0.719584	N	N	1	1	0	2
YPR190C	5.4556	1.85514	3.65537	1.57522	2.06904	1.82213	3.0396	2.68121	2.86041	0.302352	0.492296	0.106503	0.709239	N	N	0	0	1	1
YPR191W	2.7278	3.33925	3.03352	1.57522	1.18231	1.37876	2.12772	2.68121	2.40446	0.342457	0.060058	0.100929	0.328965	N	N	1	0	0	1
YPR194C	6.8195	2.22616	4.52283	2.36283	1.18231	1.77257	1.21584	1.07248	1.14416	0.406807	0.435086	0.596923	0.376902	N	N	0	1	0	1
YPR196W	3.40975	1.48411	2.44693	1.57522	0.591154	1.08319	1.5198	2.68121	2.1005	0.353918	0.369472	0.0662976	0.963448	N	N	0	1	0	1
YPR199C	2.7278	0.742055	1.73493	0.78761	0.88673	0.83717	2.43168	0.536242	1.48396	0.316467	0.531793	0.0678586	0.59981	N	N	0	2	0	2
YPR204W	33.4155	24.4878	28.9517	3.93805	5.91154	4.92479	1.82376	7.50739	4.66557	0.769286	0.103806	0.792769	0.0979044	N	N	0	0	0	0
ZOD1	1.3639	0.742055	1.05298	2.36283	0.591154	1.47699	0.60792	1.07248	0.840202	-0.146959	0.717679	0.0980352	0.811182	N	N	0	0	0	0
YPR203W	2.04585	1.48411	1.76498	0.78761	0.591154	0.689382	0.30396	0.536242	0.420101	0.40828	0.132561	0.623386	0.124777	N	N	0	0	0	0
YPR201W	0.68195	0.371027	0.526488	0.78761	0.591154	0.689382	0.30396	1.07248	0.688222	-0.117071	0.483583	-0.11634	0.29357	N	N	0	0	0	0
YPR200C	1.3639	0.371027	0.867463	0.78761	0.295577	0.541593	0.60792	1.07248	0.840202	0.204578	0.634192	0.0138674	0.887926	N	N	0	0	0	0
YPR198W	10.9112	7.42055	9.16587	7.08849	3.25134	5.16992	10.3346	23.5946	16.9646	0.24869	0.264378	-0.267371	0.134098	N	N	0	0	0	0
YPR197C	2.7278	2.96822	2.84801	0.78761	2.06904	1.42832	3.34356	1.07248	2.20802	0.299715	0.260855	0.110538	0.268752	N	N	0	0	0	0
YPR195C	1.3639	0.371027	0.867463	0.78761	0.295577	0.541593	0.30396	0.536242	0.420101	0.204578	0.634192	0.314897	0.575907	N	N	0	0	0	0
YPR193C	1.3639	0.742055	1.05298	0.78761	0.295577	0.541593	0.30396	0.536242	0.420101	0.288746	0.331883	0.399065	0.307746	N	N	0	0	0	0
YPR192W	0.68195	2.59719	1.63957	0.78761	0.591154	0.689382	0.91188	0.536242	0.724061	0.37627	0.50143	0.354955	0.482149	N	N	0	0	0	0
YPR188C	2.04585	0.371027	1.20844	0.78761	1.47788	1.13275	1.5198	0.536242	1.02802	0.0280915	0.944186	0.0702224	0.70089	N	N	0	0	0	0
YPR187W	2.7278	1.11308	1.92044	2.36283	1.77346	2.06815	1.21584	3.75369	2.48477	-0.0321802	0.886949	-0.111885	0.36904	N	N	0	0	0	0
YPR186C	2.7278	0.371027	1.54941	0.78761	0.295577	0.541593	0.91188	2.14497	1.52842	0.456494	0.547006	0.00592335	0.848861	N	N	0	0	0	0
YPR184W	54.556	41.9261	48.241	18.115	18.0302	18.0726	14.2861	23.5946	18.9404	0.426396	0.131349	0.406028	0.114184	N	N	0	0	0	0
YPR183W	2.04585	4.45233	3.24909	4.72566	2.06904	3.39735	1.5198	2.68121	2.1005	-0.0193785	0.941671	0.189438	0.603992	N	N	0	0	0	0
YPR182W	0.68195	0.742055	0.712002	0.78761	1.18231	0.984958	1.21584	0.536242	0.876041	-0.140937	0.394565	-0.0900431	0.978134	N	N	0	0	0	0
YPR179C	0.68195	1.48411	1.08303	0.78761	0.591154	0.689382	0.60792	2.14497	1.37644	0.196181	0.501211	-0.104118	0.346976	N	N	0	0	0	0
YPR178W	0.68195	1.48411	1.08303	1.57522	0.591154	1.08319	1.21584	0.536242	0.876041	-6.30206e-05	0.999826	0.0921158	0.51346	N	N	0	0	0	0
YPR177C	0.68195	0.742055	0.712002	0.78761	0.295577	0.541593	0.30396	0.536242	0.420101	0.118808	0.613827	0.229128	0.105068	N	N	0	0	0	0
YPR176C	4.0917	1.11308	2.60239	3.15044	1.47788	2.31416	2.73564	1.60873	2.17218	0.0509786	0.885111	0.0784759	0.716232	N	N	0	0	0	0
YPR175W	1.3639	1.11308	1.23849	0.78761	0.88673	0.83717	1.5198	2.14497	1.83238	0.170079	0.157194	-0.170124	0.069225	N	N	0	0	0	0
YPR174C	2.04585	1.48411	1.76498	0.78761	0.591154	0.689382	0.91188	0.536242	0.724061	0.40828	0.132561	0.386964	0.126524	N	N	0	0	0	0
YPR172W	0.68195	1.11308	0.897516	0.78761	0.295577	0.541593	0.91188	1.07248	0.992182	0.219369	0.391861	-0.0435492	0.643592	N	N	0	0	0	0
YPR171W	4.0917	2.59719	3.34444	4.72566	0.88673	2.80619	2.12772	1.60873	1.86822	0.0762062	0.829231	0.252895	0.269563	N	N	0	0	0	0
YPR170W-B	2.04585	0.742055	1.39395	1.57522	0.591154	1.08319	1.5198	3.75369	2.63675	0.109544	0.742596	-0.276821	0.173741	N	N	0	0	0	0
YPR170W-A	0.68195	0.371027	0.526488	0.78761	0.295577	0.541593	0.30396	0.536242	0.420101	-0.0122844	0.964075	0.0980352	0.811182	N	N	0	0	0	0
YPR170C	0.68195	0.371027	0.526488	0.78761	0.591154	0.689382	0.30396	1.07248	0.688222	-0.117071	0.483583	-0.11634	0.29357	N	N	0	0	0	0
YPR169W	7.50145	3.71027	5.60586	2.36283	1.47788	1.92036	1.5198	2.68121	2.1005	0.46526	0.290114	0.426319	0.334089	N	N	0	0	0	0
YPR168W	3.40975	2.22616	2.81796	1.57522	0.591154	1.08319	0.30396	1.60873	0.956343	0.415231	0.157124	0.469321	0.186017	N	N	0	0	0	0
YPR167C	4.0917	4.0813	4.0865	3.15044	3.25134	3.20089	10.3346	4.82618	7.58041	0.10608	0.0344187	-0.268341	0.367183	N	N	0	0	0	0
YPR166C	1.3639	0.742055	1.05298	1.57522	0.591154	1.08319	0.91188	0.536242	0.724061	-0.0122844	0.964075	0.162644	0.3912	N	N	0	0	0	0
YPR163C	12.2751	8.1626	10.2188	7.08849	3.25134	5.16992	6.99108	9.65235	8.32172	0.295918	0.215054	0.0891889	0.656452	N	N	0	0	0	0
YPR162C	3.40975	1.11308	2.26142	0.78761	1.18231	0.984958	1.5198	2.14497	1.83238	0.360962	0.462932	0.0913638	0.851785	N	N	0	0	0	0
YPR161C	3.40975	4.0813	3.74552	2.36283	1.77346	2.06815	1.21584	5.89866	3.55725	0.257932	0.065861	0.0223982	0.551914	N	N	0	0	0	0
YPR160W-A	0.68195	0.371027	0.526488	0.78761	0.295577	0.541593	0.30396	0.536242	0.420101	-0.0122844	0.964075	0.0980352	0.811182	N	N	0	0	0	0
YPR160C-A	7.50145	2.22616	4.8638	3.93805	1.18231	2.56018	1.21584	4.82618	3.02101	0.278706	0.541671	0.206824	0.784349	N	N	0	0	0	0
YPR159C-A	0.68195	0.371027	0.526488	0.78761	0.295577	0.541593	0.30396	0.536242	0.420101	-0.0122844	0.964075	0.0980352	0.811182	N	N	0	0	0	0
YPR158W-B	453.496	280.868	367.182	74.0353	87.7863	80.9108	279.643	247.744	263.694	0.656875	0.184486	0.143782	0.418102	N	N	0	0	0	0
YPR158W-A	46.3726	35.6186	40.9956	12.6018	10.6408	11.6213	29.4841	27.3483	28.4162	0.547484	0.106065	0.159171	0.244938	N	N	0	0	0	0
YPR158W	4.0917	1.11308	2.60239	0.78761	1.18231	0.984958	0.60792	3.21745	1.91269	0.421954	0.471708	0.133729	0.98457	N	N	0	0	0	0
YPR158C-D	493.732	323.907	408.819	85.8495	118.231	102.04	296.665	273.483	285.074	0.60276	0.161352	0.156573	0.368439	N	N	0	0	0	0
YPR158C-C	53.1921	44.8943	49.0432	11.8141	13.5965	12.7053	36.4752	35.9282	36.2017	0.586592	0.0619335	0.13185	0.196644	N	N	0	0	0	0
YPR157W	7.50145	2.96822	5.23483	0.78761	2.95577	1.87169	3.0396	2.14497	2.59228	0.446669	0.354038	0.30522	0.42445	N	N	0	0	0	0
YPR155C	2.04585	0.742055	1.39395	1.57522	0.591154	1.08319	1.5198	0.536242	1.02802	0.109544	0.742596	0.132246	0.513774	N	N	0	0	0	0
YPR154W	10.9112	7.04952	8.98036	6.30088	7.09384	6.69736	13.0703	10.1886	11.6294	0.12739	0.441612	-0.112265	0.492478	N	N	0	0	0	0
YPR153W	2.04585	1.11308	1.57947	0.78761	0.591154	0.689382	1.21584	1.60873	1.41228	0.36005	0.297152	0.0485884	0.907029	N	N	0	0	0	0
YPR152C	2.04585	1.85514	1.95049	1.57522	0.295577	0.935398	0.91188	1.07248	0.992182	0.319148	0.353546	0.293553	0.0372216	N	N	0	0	0	0
YPR151C	0.68195	0.371027	0.526488	0.78761	0.295577	0.541593	0.30396	0.536242	0.420101	-0.0122844	0.964075	0.0980352	0.811182	N	N	0	0	0	0
YPR150W	0.68195	0.371027	0.526488	0.78761	0.295577	0.541593	0.30396	0.536242	0.420101	-0.0122844	0.964075	0.0980352	0.811182	N	N	0	0	0	0
YPR147C	1.3639	1.48411	1.424	1.57522	2.66019	2.11771	3.64752	1.07248	2.36	-0.172354	0.420579	-0.219401	0.728724	N	N	0	0	0	0
YPR146C	0.68195	0.371027	0.526488	0.78761	0.88673	0.83717	1.82376	1.60873	1.71624	-0.201425	0.274277	-0.51319	0.0615724	N	N	0	0	0	0
YPR145W	32.7336	31.9084	32.321	20.4779	22.7594	21.6186	31.3079	40.2181	35.763	0.174656	0.0439103	-0.0439498	0.228936	N	N	0	0	0	0
YPR145C-A	6.8195	4.82336	5.82143	5.51327	6.79827	6.15577	8.20692	16.6235	12.4152	-0.0242528	0.80859	-0.328925	0.105822	N	N	0	0	0	0
YPR143W	0.68195	0.371027	0.526488	0.78761	0.295577	0.541593	0.60792	2.14497	1.37644	-0.0122844	0.964075	-0.41737	0.155335	N	N	0	0	0	0
YPR142C	0.68195	0.371027	0.526488	0.78761	0.295577	0.541593	0.60792	1.07248	0.840202	-0.0122844	0.964075	-0.202995	0.16725	N	N	0	0	0	0
YPR141C	3.40975	2.22616	2.81796	1.57522	0.295577	0.935398	0.60792	0.536242	0.572081	0.478938	0.164137	0.692477	0.162495	N	N	0	0	0	0
YPR140W	2.04585	0.371027	1.20844	2.36283	1.47788	1.92036	1.5198	3.21745	2.36863	-0.201158	0.551292	-0.292272	0.274654	N	N	0	0	0	0
YPR139C	0.68195	2.59719	1.63957	1.57522	0.591154	1.08319	0.91188	3.21745	2.06467	0.180027	0.671427	-0.10012	0.482024	N	N	0	0	0	0
YPR137W	2.7278	2.96822	2.84801	3.15044	1.47788	2.31416	2.12772	2.14497	2.13634	0.0901476	0.637831	0.12487	0.106793	N	N	0	0	0	0
YPR137C-B	445.313	304.242	374.778	72.4601	93.9934	83.2268	265.661	254.715	260.188	0.653511	0.144213	0.158487	0.344262	N	N	0	0	0	0
YPR137C-A	45.0087	45.2653	45.137	18.115	11.8231	14.969	35.5633	37.0007	36.282	0.479339	0.0657484	0.0948414	0.0140325	N	N	0	0	0	0
YPR136C	0.68195	0.371027	0.526488	1.57522	0.295577	0.935398	0.60792	0.536242	0.572081	-0.249608	0.637129	-0.0360687	0.888	N	N	0	0	0	0
YPR135W	2.7278	1.48411	2.10595	0.78761	1.18231	0.984958	1.21584	3.75369	2.48477	0.330031	0.30328	-0.0718368	0.37226	N	N	0	0	0	0
YPR134W	1.3639	1.11308	1.23849	1.57522	0.88673	1.23098	0.91188	1.60873	1.2603	0.00264347	0.986391	-0.00758222	0.465744	N	N	0	0	0	0
YPR133W-A	1.3639	0.742055	1.05298	1.57522	0.591154	1.08319	0.91188	2.14497	1.52842	-0.0122844	0.964075	-0.161825	0.215358	N	N	0	0	0	0
YPR133C	3.40975	3.33925	3.3745	1.57522	2.06904	1.82213	2.43168	2.68121	2.55644	0.26763	0.0948586	0.120573	0.0188204	N	N	0	0	0	0
YPR131C	0.68195	0.371027	0.526488	1.57522	1.47788	1.52655	0.60792	1.60873	1.10832	-0.462323	0.0756304	-0.323277	0.128892	N	N	0	0	0	0
YPR130C	2.04585	0.742055	1.39395	0.78761	1.47788	1.13275	0.91188	1.07248	0.992182	0.0901149	0.766165	0.147656	0.67753	N	N	0	0	0	0
YPR129W	0.68195	2.22616	1.45406	3.15044	1.18231	2.16637	1.82376	1.60873	1.71624	-0.173152	0.629293	-0.0719974	0.832205	N	N	0	0	0	0
YPR128C	1.3639	0.371027	0.867463	2.36283	1.18231	1.77257	2.12772	1.60873	1.86822	-0.310352	0.364419	-0.333178	0.316112	N	N	0	0	0	0
YPR126C	1.3639	0.371027	0.867463	0.78761	0.591154	0.689382	0.91188	0.536242	0.724061	0.0997913	0.781229	0.0784759	0.716232	N	N	0	0	0	0
YPR125W	2.7278	1.11308	1.92044	2.36283	0.295577	1.3292	3.34356	2.68121	3.01239	0.159809	0.698566	-0.19551	0.451361	N	N	0	0	0	0
YPR123C	0.68195	0.742055	0.712002	0.78761	0.295577	0.541593	1.21584	0.536242	0.876041	0.118808	0.613827	-0.0900431	0.978134	N	N	0	0	0	0
YPR122W	9.54729	6.30747	7.92738	3.93805	4.72923	4.33364	3.64752	8.04363	5.84557	0.262277	0.255055	0.132302	0.671332	N	N	0	0	0	0
YPR121W	5.4556	3.33925	4.39742	1.57522	3.25134	2.41328	3.0396	1.07248	2.05604	0.26059	0.285505	0.330166	0.185866	N	N	0	0	0	0
YPR120C	0.68195	0.371027	0.526488	0.78761	0.88673	0.83717	0.91188	1.60873	1.2603	-0.201425	0.274277	-0.379086	0.0614572	N	N	0	0	0	0
YPR119W	2.04585	0.742055	1.39395	0.78761	0.88673	0.83717	0.30396	1.60873	0.956343	0.221434	0.549584	0.163634	0.896804	N	N	0	0	0	0
YPR118W	1.3639	0.371027	0.867463	1.57522	2.95577	2.26549	1.5198	1.07248	1.29614	-0.416912	0.254126	-0.174401	0.637546	N	N	0	0	0	0
YPR116W	8.86534	2.96822	5.91678	1.57522	0.88673	1.23098	2.12772	2.14497	2.13634	0.681836	0.354737	0.442414	0.422047	N	N	0	0	0	0
YPR112C	8.86534	4.45233	6.65884	0.78761	2.36461	1.57611	2.73564	2.68121	2.70843	0.625811	0.233212	0.390682	0.323344	N	N	0	0	0	0
YPR111W	2.7278	1.11308	1.92044	0.78761	0.88673	0.83717	2.12772	1.60873	1.86822	0.360587	0.407094	0.0119721	0.859212	N	N	0	0	0	0
YPR110C	2.7278	2.22616	2.47698	3.15044	1.77346	2.46195	4.5594	4.28994	4.42467	0.00264347	0.986391	-0.251958	0.0679207	N	N	0	0	0	0
YPR109W	1.3639	0.371027	0.867463	1.57522	0.88673	1.23098	1.5198	1.60873	1.56426	-0.151998	0.614947	-0.256059	0.384305	N	N	0	0	0	0
YPR108W-A	0.68195	0.371027	0.526488	0.78761	0.295577	0.541593	0.30396	0.536242	0.420101	-0.0122844	0.964075	0.0980352	0.811182	N	N	0	0	0	0
YPR108W	6.13755	2.59719	4.36737	2.36283	2.06904	2.21593	3.0396	4.82618	3.93289	0.294663	0.437284	0.0455082	0.995663	N	N	0	0	0	0
YPR107C	1.3639	0.371027	0.867463	0.78761	0.591154	0.689382	0.60792	0.536242	0.572081	0.0997913	0.781229	0.180794	0.641564	N	N	0	0	0	0
YPR106W	0.68195	0.371027	0.526488	1.57522	0.295577	0.935398	1.82376	1.60873	1.71624	-0.249608	0.637129	-0.51319	0.0615724	N	N	0	0	0	0
YPR105C	3.40975	5.19438	4.30207	1.57522	3.25134	2.41328	5.77524	3.75369	4.76447	0.251069	0.263288	-0.0443373	0.971235	N	N	0	0	0	0
YPR104C	6.8195	3.33925	5.07937	1.57522	0.88673	1.23098	3.34356	2.68121	3.01239	0.615561	0.260394	0.226899	0.42004	N	N	0	0	0	0
YPR101W	0.68195	1.48411	1.08303	0.78761	0.88673	0.83717	0.91188	0.536242	0.724061	0.111827	0.649608	0.174865	0.455379	N	N	0	0	0	0
YPR100W	0.68195	0.371027	0.526488	1.57522	1.18231	1.37876	0.60792	0.536242	0.572081	-0.418101	0.0822674	-0.0360687	0.888	N	N	0	0	0	0
YPR099C	1.3639	0.742055	1.05298	0.78761	0.591154	0.689382	0.91188	1.07248	0.992182	0.183959	0.440346	0.0258275	0.957875	N	N	0	0	0	0
YPR098C	0.68195	0.371027	0.526488	1.57522	1.18231	1.37876	0.91188	2.14497	1.52842	-0.418101	0.0822674	-0.462855	0.098779	N	N	0	0	0	0
YPR096C	0.68195	0.371027	0.526488	0.78761	0.295577	0.541593	0.60792	0.536242	0.572081	-0.0122844	0.964075	-0.0360687	0.888	N	N	0	0	0	0
YPR095C	12.957	19.6645	16.3107	7.08849	4.43365	5.76107	8.81484	8.57987	8.69736	0.451971	0.160343	0.273087	0.262264	N	N	0	0	0	0
YPR094W	2.04585	0.742055	1.39395	0.78761	0.295577	0.541593	0.60792	2.68121	1.64456	0.410574	0.400265	-0.0718032	0.457552	N	N	0	0	0	0
YPR093C	1.3639	1.85514	1.60952	0.78761	0.295577	0.541593	0.30396	0.536242	0.420101	0.473023	0.0916359	0.583342	0.120784	N	N	0	0	0	0
YPR092W	0.68195	0.371027	0.526488	0.78761	0.88673	0.83717	0.30396	0.536242	0.420101	-0.201425	0.274277	0.0980352	0.811182	N	N	0	0	0	0
YPR088C	12.2751	10.0177	11.1464	3.15044	3.25134	3.20089	6.0792	5.36242	5.72081	0.541864	0.0892866	0.289678	0.119268	N	N	0	0	0	0
YPR087W	2.04585	0.371027	1.20844	1.57522	1.18231	1.37876	2.12772	2.14497	2.13634	-0.0572654	0.873029	-0.247447	0.465923	N	N	0	0	0	0
YPR086W	4.77365	3.33925	4.05645	3.93805	2.06904	3.00354	4.86336	5.89866	5.38101	0.130512	0.471112	-0.122718	0.243545	N	N	0	0	0	0
YPR085C	3.40975	1.11308	2.26142	0.78761	1.18231	0.984958	2.12772	2.68121	2.40446	0.360962	0.462932	-0.0266382	0.847182	N	N	0	0	0	0
YPR084W	2.7278	1.85514	2.29147	1.57522	0.591154	1.08319	2.12772	1.60873	1.86822	0.32541	0.209366	0.088685	0.414462	N	N	0	0	0	0
YPR083W	1.3639	1.11308	1.23849	2.36283	0.295577	1.3292	2.12772	1.60873	1.86822	-0.0306987	0.944366	-0.178536	0.109449	N	N	0	0	0	0
YPR082C	0.68195	0.742055	0.712002	0.78761	0.88673	0.83717	0.60792	0.536242	0.572081	-0.0703324	0.189957	0.0950238	0.0658286	N	N	0	0	0	0
YPR081C	5.4556	2.96822	4.21191	2.36283	2.36461	2.36372	3.64752	4.82618	4.23685	0.250882	0.377084	-0.00256411	0.840736	N	N	0	0	0	0
YPR078C	1.3639	0.742055	1.05298	0.78761	0.295577	0.541593	0.30396	1.60873	0.956343	0.288746	0.331883	0.0418052	0.661212	N	N	0	0	0	0
YPR077C	0.68195	0.371027	0.526488	0.78761	0.295577	0.541593	0.30396	0.536242	0.420101	-0.0122844	0.964075	0.0980352	0.811182	N	N	0	0	0	0
YPR076W	1.3639	0.742055	1.05298	1.57522	0.591154	1.08319	0.30396	1.07248	0.688222	-0.0122844	0.964075	0.18469	0.691212	N	N	0	0	0	0
YPR074W-A	0.68195	0.371027	0.526488	0.78761	0.295577	0.541593	0.30396	0.536242	0.420101	-0.0122844	0.964075	0.0980352	0.811182	N	N	0	0	0	0
YPR074C	28.6419	19.6645	24.1532	21.2655	23.055	22.1602	44.3782	37.5369	40.9576	0.0373999	0.734273	-0.22936	0.149993	N	N	0	0	0	0
YPR073C	0.68195	1.48411	1.08303	0.78761	0.591154	0.689382	2.43168	1.60873	2.0202	0.196181	0.501211	-0.270755	0.285738	N	N	0	0	0	0
YPR071W	1.3639	0.742055	1.05298	1.57522	0.88673	1.23098	1.21584	0.536242	0.876041	-0.0678304	0.738471	0.0798944	0.455481	N	N	0	0	0	0
YPR070W	3.40975	1.48411	2.44693	1.57522	2.06904	1.82213	1.5198	3.75369	2.63675	0.128042	0.632604	-0.0324471	0.585043	N	N	0	0	0	0
YPR069C	1.3639	2.22616	1.79503	0.78761	0.88673	0.83717	3.0396	4.82618	3.93289	0.331258	0.265694	-0.34064	0.0532502	N	N	0	0	0	0
YPR067W	2.04585	0.371027	1.20844	0.78761	1.18231	0.984958	1.5198	1.07248	1.29614	0.0888065	0.83484	-0.0304282	0.981704	N	N	0	0	0	0
YPR066W	3.40975	1.85514	2.63244	0.78761	0.88673	0.83717	0.91188	2.14497	1.52842	0.497545	0.258989	0.236115	0.483793	N	N	0	0	0	0
YPR065W	2.7278	1.48411	2.10595	2.36283	1.47788	1.92036	2.12772	2.14497	2.13634	0.0400669	0.832656	-0.00622231	0.964511	N	N	0	0	0	0
YPR064W	0.68195	0.742055	0.712002	0.78761	0.295577	0.541593	0.30396	0.536242	0.420101	0.118808	0.613827	0.229128	0.105068	N	N	0	0	0	0
YPR063C	2.04585	0.742055	1.39395	3.93805	0.591154	2.2646	1.82376	2.14497	1.98436	-0.210744	0.696984	-0.153374	0.489338	N	N	0	0	0	0
YPR062W	2.04585	4.45233	3.24909	2.36283	0.591154	1.47699	1.5198	1.60873	1.56426	0.342384	0.366414	0.317452	0.398757	N	N	0	0	0	0
YPR061C	0.68195	0.371027	0.526488	0.78761	0.295577	0.541593	0.60792	0.536242	0.572081	-0.0122844	0.964075	-0.0360687	0.888	N	N	0	0	0	0
YPR059C	0.68195	0.371027	0.526488	0.78761	0.295577	0.541593	1.5198	0.536242	1.02802	-0.0122844	0.964075	-0.290613	0.486479	N	N	0	0	0	0
YPR058W	1.3639	1.48411	1.424	3.15044	2.36461	2.75753	3.34356	3.21745	3.28051	-0.287008	0.175466	-0.36243	0.00522954	N	N	0	0	0	0
YPR057W	2.04585	1.11308	1.57947	3.15044	1.77346	2.46195	1.5198	1.60873	1.56426	-0.192769	0.412559	0.00420036	0.990409	N	N	0	0	0	0
YPR056W	1.3639	1.11308	1.23849	1.57522	1.47788	1.52655	2.12772	4.28994	3.20883	-0.0908188	0.23054	-0.413454	0.120206	N	N	0	0	0	0
YPR055W	5.4556	5.19438	5.32499	2.36283	1.18231	1.77257	2.73564	10.1886	6.46212	0.477716	0.0920748	-0.0840561	0.352729	N	N	0	0	0	0
YPR054W	1.3639	1.48411	1.424	1.57522	0.591154	1.08319	1.21584	2.68121	1.94852	0.118808	0.613827	-0.136195	0.241024	N	N	0	0	0	0
YPR053C	1.3639	0.742055	1.05298	0.78761	0.591154	0.689382	0.30396	0.536242	0.420101	0.183959	0.440346	0.399065	0.307746	N	N	0	0	0	0
YPR051W	2.04585	1.11308	1.57947	2.36283	0.88673	1.62478	1.21584	0.536242	0.876041	-0.0122844	0.964075	0.255986	0.288042	N	N	0	0	0	0
YPR050C	0.68195	1.11308	0.897516	0.78761	0.591154	0.689382	0.91188	2.14497	1.52842	0.114582	0.504451	-0.231202	0.144358	N	N	0	0	0	0
YPR049C	4.77365	5.93644	5.35504	5.51327	4.43365	4.97346	5.47128	6.4349	5.95309	0.0321043	0.678243	-0.0459797	0.365657	N	N	0	0	0	0
YPR048W	2.7278	1.85514	2.29147	1.57522	1.77346	1.67434	1.21584	3.21745	2.21665	0.13627	0.38341	0.0144174	0.588224	N	N	0	0	0	0
YPR046W	0.68195	0.371027	0.526488	0.78761	0.295577	0.541593	0.30396	1.07248	0.688222	-0.0122844	0.964075	-0.11634	0.29357	N	N	0	0	0	0
YPR045C	4.0917	3.33925	3.71547	3.15044	2.66019	2.90532	4.25544	5.89866	5.07705	0.106821	0.233059	-0.135598	0.0870573	N	N	0	0	0	0
YPR044C	7.50145	4.82336	6.1624	6.30088	7.685	6.99294	9.42276	9.65235	9.53756	-0.0549097	0.652481	-0.189687	0.236249	N	N	0	0	0	0
YPR043W	4.77365	2.96822	3.87093	3.15044	5.0248	4.08762	6.38316	6.4349	6.40903	-0.0236551	0.883075	-0.218977	0.216459	N	N	0	0	0	0
YPR040W	2.04585	1.11308	1.57947	1.57522	0.88673	1.23098	2.73564	1.07248	1.90406	0.108261	0.613365	-0.081171	0.897497	N	N	0	0	0	0
YPR039W	1.3639	0.371027	0.867463	0.78761	0.295577	0.541593	0.30396	0.536242	0.420101	0.204578	0.634192	0.314897	0.575907	N	N	0	0	0	0
YPR038W	1.3639	0.371027	0.867463	0.78761	0.591154	0.689382	0.30396	1.07248	0.688222	0.0997913	0.781229	0.100523	0.983871	N	N	0	0	0	0
YPR037C	3.40975	2.59719	3.00347	0.78761	0.88673	0.83717	1.21584	1.07248	1.14416	0.55481	0.113727	0.419136	0.132101	N	N	0	0	0	0
YPR033C	4.77365	7.79157	6.28261	7.8761	4.72923	6.30266	10.6386	12.8698	11.7542	-0.00138397	0.993497	-0.272053	0.123533	N	N	0	0	0	0
YPR032W	2.7278	4.45233	3.59006	2.36283	1.18231	1.77257	3.34356	2.14497	2.74426	0.306499	0.240169	0.116676	0.396353	N	N	0	0	0	0
YPR031W	3.40975	1.85514	2.63244	2.36283	0.88673	1.62478	0.60792	1.07248	0.840202	0.209564	0.446636	0.495975	0.270646	N	N	0	0	0	0
YPR030W	13.639	10.7598	12.1994	7.08849	3.54692	5.31771	4.25544	8.57987	6.41766	0.360614	0.0994057	0.278962	0.130155	N	N	0	0	0	0
YPR029C	6.13755	2.96822	4.55288	1.57522	3.25134	2.41328	4.86336	8.04363	6.45349	0.275678	0.386321	-0.151508	0.308178	N	N	0	0	0	0
YPR027C	0.68195	0.742055	0.712002	0.78761	0.295577	0.541593	0.60792	0.536242	0.572081	0.118808	0.613827	0.0950238	0.0658286	N	N	0	0	0	0
YPR026W	8.86534	6.67849	7.77192	0.78761	1.77346	1.28054	4.5594	2.68121	3.62031	0.783137	0.0671374	0.331783	0.107963	N	N	0	0	0	0
YPR025C	2.04585	1.11308	1.57947	0.78761	0.88673	0.83717	0.91188	2.14497	1.52842	0.275696	0.354768	0.0142663	0.696602	N	N	0	0	0	0
YPR023C	12.2751	4.82336	8.54922	4.72566	2.36461	3.54514	2.73564	6.4349	4.58527	0.382294	0.394392	0.270562	0.561609	N	N	0	0	0	0
YPR022C	10.9112	7.79157	9.35138	3.93805	1.47788	2.70797	3.95148	5.36242	4.65695	0.538233	0.0848478	0.302774	0.205645	N	N	0	0	0	0
YPR020W	0.68195	0.371027	0.526488	0.78761	0.88673	0.83717	0.60792	1.60873	1.10832	-0.201425	0.274277	-0.323277	0.128892	N	N	0	0	0	0
YPR017C	0.68195	0.742055	0.712002	1.57522	0.88673	1.23098	0.60792	0.536242	0.572081	-0.237768	0.371345	0.0950238	0.0658286	N	N	0	0	0	0
YPR016W-A	0.68195	0.371027	0.526488	0.78761	0.295577	0.541593	0.30396	0.536242	0.420101	-0.0122844	0.964075	0.0980352	0.811182	N	N	0	0	0	0
YPR015C	4.0917	2.96822	3.52996	2.36283	3.8425	3.10266	3.34356	3.21745	3.28051	0.0560349	0.693535	0.0318287	0.704717	N	N	0	0	0	0
YPR014C	0.68195	0.742055	0.712002	0.78761	0.295577	0.541593	0.30396	1.07248	0.688222	0.118808	0.613827	0.0147528	0.540236	N	N	0	0	0	0
YPR013C	4.0917	2.22616	3.15893	3.15044	1.47788	2.31416	2.43168	3.21745	2.82457	0.135146	0.570319	0.0485884	0.907029	N	N	0	0	0	0
YPR012W	0.68195	0.371027	0.526488	0.78761	0.295577	0.541593	0.60792	0.536242	0.572081	-0.0122844	0.964075	-0.0360687	0.888	N	N	0	0	0	0
YPR011C	4.0917	1.48411	2.7879	0.78761	1.47788	1.13275	1.21584	2.14497	1.6804	0.391145	0.415636	0.219864	0.622806	N	N	0	0	0	0
YPR010C	35.4614	34.8766	35.169	20.4779	14.1877	17.3328	19.7574	19.3047	19.5311	0.307292	0.108625	0.255434	0.00436925	N	N	0	0	0	0
YPR009W	2.04585	2.22616	2.13601	3.15044	0.591154	1.8708	3.0396	2.14497	2.59228	0.057576	0.869958	-0.08408	0.478258	N	N	0	0	0	0
YPR008W	15.6848	6.30747	10.9962	5.51327	5.0248	5.26904	9.1188	8.04363	8.58122	0.31951	0.43633	0.107692	0.668991	N	N	0	0	0	0
YPR007C	0.68195	0.742055	0.712002	1.57522	0.591154	1.08319	0.91188	0.536242	0.724061	-0.182222	0.588362	-0.00729386	0.539081	N	N	0	0	0	0
YPR006C	0.68195	1.11308	0.897516	0.78761	0.591154	0.689382	2.43168	1.07248	1.75208	0.114582	0.504451	-0.290512	0.348387	N	N	0	0	0	0
YPR005C	1.3639	1.48411	1.424	0.78761	0.295577	0.541593	1.21584	0.536242	0.876041	0.419838	0.156539	0.210987	0.117602	N	N	0	0	0	0
YPR003C	4.0917	2.22616	3.15893	2.36283	0.88673	1.62478	0.91188	4.28994	2.60091	0.288746	0.331883	0.0844152	0.841233	N	N	0	0	0	0
YPR002W	1.3639	0.371027	0.867463	0.78761	0.591154	0.689382	0.60792	0.536242	0.572081	0.0997913	0.781229	0.180794	0.641564	N	N	0	0	0	0
YPR002C-A	8.1834	1.85514	5.01927	3.93805	2.36461	3.15133	4.25544	2.14497	3.2002	0.202146	0.660105	0.195463	0.592623	N	N	0	0	0	0
YPR001W	0.68195	0.742055	0.712002	0.78761	0.591154	0.689382	1.5198	0.536242	1.02802	0.0140215	0.857493	-0.159521	0.823315	N	N	0	0	0	0
YPL283W-B	4.0917	2.96822	3.52996	0.78761	0.88673	0.83717	0.30396	0.536242	0.420101	0.624956	0.128596	0.924416	0.112787	N	N	0	0	0	0
YPL283W-A	15.0029	12.6149	13.8089	2.36283	2.66019	2.51151	2.12772	1.07248	1.6001	0.740224	0.0633984	0.936012	0.050682	N	N	0	0	0	0
YPL282C	6.8195	2.59719	4.70834	7.8761	8.8673	8.3717	15.198	24.6671	19.9326	-0.249946	0.321556	-0.626695	0.0319064	N	N	0	0	0	0
YPL281C	2.7278	1.48411	2.10595	0.78761	0.591154	0.689382	0.60792	1.07248	0.840202	0.484989	0.256701	0.399065	0.307746	N	N	0	0	0	0
YPL280W	0.68195	1.11308	0.897516	0.78761	0.295577	0.541593	0.60792	0.536242	0.572081	0.219369	0.391861	0.195585	0.355449	N	N	0	0	0	0
YPL279C	0.68195	0.742055	0.712002	0.78761	0.88673	0.83717	0.91188	1.07248	0.992182	-0.0703324	0.189957	-0.14411	0.0284742	N	N	0	0	0	0
YPL278C	0.68195	0.371027	0.526488	0.78761	0.295577	0.541593	0.30396	1.07248	0.688222	-0.0122844	0.964075	-0.11634	0.29357	N	N	0	0	0	0
YPL277C	2.7278	3.33925	3.03352	2.36283	0.591154	1.47699	2.43168	1.60873	2.0202	0.312569	0.308295	0.176552	0.0959932	N	N	0	0	0	0
YPL276W	0.68195	0.371027	0.526488	0.78761	0.295577	0.541593	0.30396	0.536242	0.420101	-0.0122844	0.964075	0.0980352	0.811182	N	N	0	0	0	0
YPL275W	0.68195	0.742055	0.712002	0.78761	0.591154	0.689382	0.30396	0.536242	0.420101	0.0140215	0.857493	0.229128	0.105068	N	N	0	0	0	0
YPL272C	74.3325	66.4139	70.3732	53.5575	56.4552	55.0063	130.703	191.975	161.339	0.106995	0.128378	-0.360331	0.0751809	N	N	0	0	0	0
YPL269W	2.7278	1.11308	1.92044	0.78761	1.18231	0.984958	1.21584	2.14497	1.6804	0.289983	0.446465	0.0579871	0.993958	N	N	0	0	0	0
YPL268W	4.0917	2.59719	3.34444	1.57522	2.06904	1.82213	2.12772	4.82618	3.47695	0.263745	0.267897	-0.0168743	0.507583	N	N	0	0	0	0
YPL267W	1.3639	0.371027	0.867463	1.57522	0.295577	0.935398	0.60792	0.536242	0.572081	-0.0327455	0.9412	0.180794	0.641564	N	N	0	0	0	0
YPL266W	1.3639	1.48411	1.424	0.78761	0.88673	0.83717	3.34356	1.60873	2.47614	0.230698	0.0189463	-0.240264	0.385907	N	N	0	0	0	0
YPL265W	20.4585	13.357	16.9077	9.45132	7.09384	8.27258	17.6297	17.696	17.6628	0.310444	0.223008	-0.0189749	0.863765	N	N	0	0	0	0
YPL264C	2.04585	0.742055	1.39395	1.57522	0.591154	1.08319	0.91188	0.536242	0.724061	0.109544	0.742596	0.284473	0.447024	N	N	0	0	0	0
YPL261C	0.68195	0.371027	0.526488	0.78761	0.295577	0.541593	0.30396	0.536242	0.420101	-0.0122844	0.964075	0.0980352	0.811182	N	N	0	0	0	0
YPL260W	7.50145	4.82336	6.1624	0.78761	2.66019	1.7239	3.34356	5.36242	4.35299	0.553238	0.127116	0.150962	0.500966	N	N	0	0	0	0
YPL259C	3.40975	3.33925	3.3745	0.78761	2.36461	1.57611	3.0396	3.21745	3.12853	0.330622	0.262498	0.0328693	0.0763675	N	N	0	0	0	0
YPL258C	2.04585	4.0813	3.06357	1.57522	0.295577	0.935398	1.21584	1.07248	1.14416	0.515232	0.241644	0.427741	0.305214	N	N	0	0	0	0
YPL257W-B	468.499	310.55	389.525	92.1504	105.225	98.6878	301.528	277.237	289.383	0.596271	0.166693	0.129062	0.406005	N	N	0	0	0	0
YPL257W-A	62.0574	40.813	51.4352	11.8141	16.5523	14.1832	37.995	39.1457	38.5703	0.559486	0.162779	0.125007	0.446373	N	N	0	0	0	0
YPL257W	0.68195	0.371027	0.526488	0.78761	0.591154	0.689382	0.60792	1.07248	0.840202	-0.117071	0.483583	-0.202995	0.16725	N	N	0	0	0	0
YPL256C	2.7278	1.85514	2.29147	1.57522	1.18231	1.37876	0.91188	3.21745	2.06467	0.220624	0.249273	0.045264	0.679516	N	N	0	0	0	0
YPL255W	2.04585	1.11308	1.57947	1.57522	0.295577	0.935398	0.30396	0.536242	0.420101	0.227514	0.508216	0.575156	0.250745	N	N	0	0	0	0
YPL254W	1.3639	1.85514	1.60952	1.57522	0.591154	1.08319	0.60792	1.07248	0.840202	0.171993	0.469081	0.282312	0.186604	N	N	0	0	0	0
YPL253C	3.40975	1.11308	2.26142	1.57522	0.591154	1.08319	0.91188	1.60873	1.2603	0.319677	0.482924	0.253905	0.601832	N	N	0	0	0	0
YPL252C	0.68195	0.742055	0.712002	2.36283	1.47788	1.92036	1.21584	2.68121	1.94852	-0.430901	0.222092	-0.437225	0.140998	N	N	0	0	0	0
YPL251W	0.68195	0.742055	0.712002	0.78761	1.18231	0.984958	0.60792	0.536242	0.572081	-0.140937	0.394565	0.0950238	0.0658286	N	N	0	0	0	0
YPL250W-A	2.04585	1.48411	1.76498	3.93805	2.36461	3.15133	6.38316	6.97114	6.67715	-0.251755	0.306426	-0.577852	0.0115344	N	N	0	0	0	0
YPL249C-A	2.04585	1.11308	1.57947	1.57522	2.95577	2.26549	3.95148	5.89866	4.92507	-0.156653	0.506988	-0.493902	0.0297008	N	N	0	0	0	0
YPL249C	5.4556	9.27568	7.36564	3.93805	4.43365	4.18585	3.64752	7.50739	5.57745	0.245427	0.340735	0.120775	0.748513	N	N	0	0	0	0
YPL248C	5.4556	4.0813	4.76845	0.78761	0.591154	0.689382	1.82376	3.21745	2.52061	0.839917	0.100577	0.276872	0.174736	N	N	0	0	0	0
YPL246C	2.7278	2.96822	2.84801	3.93805	1.18231	2.56018	4.5594	1.07248	2.81594	0.0462711	0.868988	0.00491756	0.486489	N	N	0	0	0	0
YPL245W	2.7278	1.11308	1.92044	2.36283	1.18231	1.77257	1.21584	2.14497	1.6804	0.0347978	0.89711	0.0579871	0.993958	N	N	0	0	0	0
YPL244C	4.0917	1.85514	2.97342	1.57522	1.47788	1.52655	2.12772	2.14497	2.13634	0.289544	0.418581	0.143585	0.592507	N	N	0	0	0	0
YPL241C	0.68195	0.371027	0.526488	1.57522	0.295577	0.935398	2.12772	1.07248	1.6001	-0.249608	0.637129	-0.482759	0.146319	N	N	0	0	0	0
[truncated: 5,144 more rows]
